# Supplementary material for: Analysis of matched primary and recurrent BRCA1/2 mutation-associated tumors identifies recurrence-specific drivers
Source: Research Square preprint supplement (doi:10.21203/rs.3.rs-745248/v1), 2021-08-30
Supplement: Supplementary file 1 [file 2aee67dcd7213d0b3909364f.xlsx]

## Sheet: PrimaryRecurrent_PARP1
Tumor	Patient	Tumor Type	Sample Type	Germline Mutation Gene	Total Copy Number at PARP1 Locus	PARP1 Copy Number Status	Segment of PARP1 Gain or Amplification
1-1	1	Breast	Primary tumor	BRCA1	5	Gain	chr1:164559535-235972867
1-2	1	Breast	Recurrence #1	BRCA1	7	Amplification	chr1:201180500-235972867
2-1	2	Breast	Primary tumor	BRCA1	7	Amplification	chr1:166591270-248814126
2-2	2	Breast	Recurrence #1	BRCA1	7	Amplification	chr1:197515980-248814126
3-1	3	Breast	Primary tumor	BRCA1	2	Neutral	NA
3-2	3	Breast	Recurrence #1	BRCA1	3	Neutral	NA
4-1	4	Breast	Primary tumor	BRCA1	4	Gain	chr1:222646810-227968107
4-2	4	Breast	Recurrence #1	BRCA1	8	Amplification	chr1:211280736-233905654
5-1	5	Breast	Primary tumor	BRCA1	4	Gain	chr1:196148426-249110906
5-2	5	Breast	Recurrence #1	BRCA1	4	Gain	chr1:193218842-227695408
6-1	6	Breast	Primary tumor	BRCA1	2	Neutral	NA
6-2	6	Breast	Recurrence #1	BRCA1	5	Gain	chr1:214656761-227680864
6-3	6	Breast	Recurrence #2	BRCA1	3	Neutral	NA
6-4	6	Breast	Recurrence #3	BRCA1	6	Amplification	chr1:186946637-235078914
7-1	7	Breast	Primary tumor	BRCA1	4	Gain	chr1:223285199-228004967
7-2	7	Breast	Recurrence #1	BRCA1	6	Amplification	chr1:226353520-230713353
8-1	8	Breast	Primary tumor	BRCA1	5	Gain	chr1:201754411-249231048
8-2	8	Breast	Recurrence #1	BRCA1	4	Gain	chr1:215848586-249231048
9-1	9	Breast	Primary tumor	BRCA1	2	Neutral	NA
9-2	9	Breast	Recurrence #1	BRCA1	6	Amplification	chr1:218191083-234617238
9-3	9	Breast	Recurrence #2	BRCA1	4	Gain	chr1:226127442-227148258
10-1	10	Breast	Primary tumor	BRCA2	7	Amplification	chr1:160156026-249211350
10-2	10	Breast	Recurrence #1	BRCA2	3	Neutral	NA
10-3	10	Breast	Recurrence #2	BRCA2	8	Amplification	chr1:159778698-249211350
11-1	11	Breast	Primary tumor	BRCA2	2	Neutral	NA
11-2	11	Breast	Recurrence #1	BRCA2	6	Amplification	chr1:170916645-249149869
11-3	11	Breast	Recurrence #2	BRCA2	6	Amplification	chr1:170339406-249149869
12-1	12	Breast	Primary tumor	BRCA2	6	Amplification	chr1:181018095-249231026
12-2	12	Breast	Recurrence #1	BRCA2	6	Amplification	chr1:204237415-249231094
13-1	13	Breast	Primary tumor	BRCA2	3	Neutral	NA
13-2	13	Breast	Recurrence #1	BRCA2	0	Deletion	NA
14-1	14	Ovary	Primary tumor	BRCA1	2	Neutral	NA
14-2	14	Ovary	Recurrence #1	BRCA1	2	Neutral	NA
15-1	15	Ovary	Primary tumor	BRCA1	5	Gain	chr1:225548349-228033333
15-2	15	Ovary	Recurrence #1	BRCA1	3	Neutral	NA
16-1	16	Ovary	Primary tumor	BRCA1	3	Neutral	NA
16-2	16	Ovary	Recurrence #1	BRCA1	7	Amplification	chr1:200877785-232534776
17-1	17	Ovary	Primary tumor	BRCA1	6	Amplification	chr1:214787129-228210699
17-2	17	Ovary	Recurrence #1	BRCA1	2	Neutral	NA
18-1	18	Ovary	Primary tumor	BRCA1	4	Gain	chr1:180144484-249230943
18-2	18	Ovary	Recurrence #1	BRCA1	4	Gain	chr1:178524794-248637685
19-1	19	Ovary	Primary tumor	BRCA1	2	Neutral	NA
19-2	19	Ovary	Recurrence #1	BRCA1	3	Neutral	NA
19-3	19	Ovary	Recurrence #2	BRCA1	2	Neutral	NA
20-1	20	Ovary	Primary tumor	BRCA1	4	Gain	chr1:148853452-249231048
20-2	20	Ovary	Recurrence #1	BRCA1	4	Gain	chr1:200116953-228033128
20-3	20	Ovary	Recurrence #2	BRCA1	2	Neutral	NA
20-4	20	Ovary	Recurrence #3	BRCA1	4	Gain	chr1:196800857-228033128
20-5	20	Ovary	Recurrence #4	BRCA1	4	Gain	chr1:214786660-227681586
21-1	21	Ovary	Primary tumor	BRCA1	2	Neutral	NA
21-2	21	Ovary	Recurrence #1	BRCA1	1	Loss	NA
21-3	21	Ovary	Recurrence #2	BRCA1	1	Loss	NA
21-4	21	Ovary	Recurrence #3	BRCA1	3	Neutral	NA
21-5	21	Ovary	Recurrence #4	BRCA1	1	Loss	NA
21-6	21	Ovary	Recurrence #5	BRCA1	2	Neutral	NA
22-1	22	Ovary	Primary tumor	BRCA1	3	Neutral	NA
22-2	22	Ovary	Recurrence #1	BRCA1	4	Gain	chr1:191890850-231337786
23-1	23	Ovary	Primary tumor	BRCA1	5	Gain	chr1:226474131-228699477
23-2	23	Ovary	Recurrence #1	BRCA1	2	Neutral	NA
24-1	24	Ovary	Primary tumor	BRCA2	3	Neutral	NA
24-2	24	Ovary	Recurrence #1	BRCA2	3	Neutral	NA
25-1	25	Ovary	Primary tumor	BRCA2	4	Gain	chr1:225528182-249239791
25-2	25	Ovary	Recurrence #1	BRCA2	6	Amplification	chr1:224363369-248814052
26-1	26	Ovary	Primary tumor	BRCA2	2	Neutral	NA
26-2	26	Ovary	Recurrence #1	BRCA2	2	Neutral	NA
27-1	27	Ovary	Primary tumor	BRCA2	2	Neutral	NA
27-2	27	Ovary	Recurrence #1	BRCA2	3	Neutral	NA

## Sheet: TCGA_PARP1
TCGA Tumor	Tumor Type	Tumor Group	Germline Mutation Gene	Build of Tumor + Germline bam file	Total Copy Number at PARP1 Locus	PARP1 Copy Number Status	Segment of PARP1 Gain or Amplification
TCGA-04-1356-01A	Ovarian	gBRCA1/2	BRCA1	GRCh37	0	Deletion	NA
TCGA-AN-A0AL-01A	Breast	gBRCA1/2	BRCA1	GRCh38	1	Loss	NA
TCGA-A2-A04Y-01A	Breast	HR-WT	NA	GRCh38	1	Loss	NA
TCGA-A2-A0EX-01A	Breast	HR-WT	NA	GRCh38	1	Loss	NA
TCGA-A2-A0YF-01A	Breast	HR-WT	NA	GRCh38	1	Loss	NA
TCGA-E2-A10A-01A	Breast	HR-WT	NA	GRCh38	1	Loss	NA
TCGA-E2-A15R-01A	Breast	HR-WT	NA	GRCh38	1	Loss	NA
TCGA-13-0905-01B	Ovarian	HR-WT	NA	GRCh38	1	Loss	NA
TCGA-13-1492-01A	Ovarian	HR-WT	NA	GRCh38	1	Loss	NA
TCGA-25-2391-01A	Ovarian	HR-WT	NA	GRCh38	1	Loss	NA
TCGA-30-1891-01A	Ovarian	HR-WT	NA	GRCh38	1	Loss	NA
TCGA-AO-A03V-01A	Breast	gBRCA1/2	BRCA2	GRCh38	2	Neutral	NA
TCGA-BH-A0B4-01A	Breast	gBRCA1/2	BRCA2	GRCh38	2	Neutral	NA
TCGA-EW-A1P7-01A	Breast	gBRCA1/2	BRCA2	GRCh38	2	Neutral	NA
TCGA-EW-A1PD-01A	Breast	gBRCA1/2	BRCA2	GRCh38	2	Neutral	NA
TCGA-A8-A09W-01A	Breast	gBRCA1/2	BRCA2	GRCh37	2	Neutral	NA
TCGA-A1-A0SD-01A	Breast	HR-WT	NA	GRCh38	2	Neutral	NA
TCGA-A2-A04N-01A	Breast	HR-WT	NA	GRCh38	2	Neutral	NA
TCGA-A2-A04V-01A	Breast	HR-WT	NA	GRCh38	2	Neutral	NA
TCGA-A2-A0CL-01A	Breast	HR-WT	NA	GRCh38	2	Neutral	NA
TCGA-A2-A0CR-01A	Breast	HR-WT	NA	GRCh38	2	Neutral	NA
TCGA-A2-A0D1-01A	Breast	HR-WT	NA	GRCh38	2	Neutral	NA
TCGA-A2-A0EP-01A	Breast	HR-WT	NA	GRCh38	2	Neutral	NA
TCGA-A2-A0ER-01A	Breast	HR-WT	NA	GRCh38	2	Neutral	NA
TCGA-A2-A0ES-01A	Breast	HR-WT	NA	GRCh38	2	Neutral	NA
TCGA-A2-A0EW-01A	Breast	HR-WT	NA	GRCh38	2	Neutral	NA
TCGA-A2-A1FX-01A	Breast	HR-WT	NA	GRCh38	2	Neutral	NA
TCGA-A2-A1G4-01A	Breast	HR-WT	NA	GRCh38	2	Neutral	NA
TCGA-A2-A25F-01A	Breast	HR-WT	NA	GRCh38	2	Neutral	NA
TCGA-A2-A3XV-01A	Breast	HR-WT	NA	GRCh38	2	Neutral	NA
TCGA-A2-A3XW-01A	Breast	HR-WT	NA	GRCh38	2	Neutral	NA
TCGA-A2-A4RY-01A	Breast	HR-WT	NA	GRCh38	2	Neutral	NA
TCGA-A2-A4S0-01A	Breast	HR-WT	NA	GRCh38	2	Neutral	NA
TCGA-A2-A4S3-01A	Breast	HR-WT	NA	GRCh38	2	Neutral	NA
TCGA-A7-A0D9-01A	Breast	HR-WT	NA	GRCh38	2	Neutral	NA
TCGA-A7-A3IY-01A	Breast	HR-WT	NA	GRCh38	2	Neutral	NA
TCGA-A8-A06P-01A	Breast	HR-WT	NA	GRCh38	2	Neutral	NA
TCGA-A8-A07J-01A	Breast	HR-WT	NA	GRCh38	2	Neutral	NA
TCGA-A8-A08H-01A	Breast	HR-WT	NA	GRCh38	2	Neutral	NA
TCGA-A8-A09D-01A	Breast	HR-WT	NA	GRCh38	2	Neutral	NA
TCGA-A8-A0AD-01A	Breast	HR-WT	NA	GRCh38	2	Neutral	NA
TCGA-AC-A2FF-01A	Breast	HR-WT	NA	GRCh38	2	Neutral	NA
TCGA-AC-A2FK-01A	Breast	HR-WT	NA	GRCh38	2	Neutral	NA
TCGA-AC-A2QJ-01A	Breast	HR-WT	NA	GRCh38	2	Neutral	NA
TCGA-AC-A3QP-01A	Breast	HR-WT	NA	GRCh38	2	Neutral	NA
TCGA-AN-A0AT-01A	Breast	HR-WT	NA	GRCh38	2	Neutral	NA
TCGA-AN-A0XV-01A	Breast	HR-WT	NA	GRCh38	2	Neutral	NA
TCGA-AO-A0J6-01A	Breast	HR-WT	NA	GRCh38	2	Neutral	NA
TCGA-AO-A0JC-01A	Breast	HR-WT	NA	GRCh38	2	Neutral	NA
TCGA-AO-A0JI-01A	Breast	HR-WT	NA	GRCh38	2	Neutral	NA
TCGA-AO-A12H-01A	Breast	HR-WT	NA	GRCh38	2	Neutral	NA
TCGA-AQ-A04J-01A	Breast	HR-WT	NA	GRCh38	2	Neutral	NA
TCGA-AR-A0TX-01A	Breast	HR-WT	NA	GRCh38	2	Neutral	NA
TCGA-AR-A5QQ-01A	Breast	HR-WT	NA	GRCh38	2	Neutral	NA
TCGA-B6-A0IC-01A	Breast	HR-WT	NA	GRCh38	2	Neutral	NA
TCGA-B6-A0IK-01A	Breast	HR-WT	NA	GRCh38	2	Neutral	NA
TCGA-B6-A0IM-01A	Breast	HR-WT	NA	GRCh38	2	Neutral	NA
TCGA-B6-A0RT-01A	Breast	HR-WT	NA	GRCh38	2	Neutral	NA
TCGA-B6-A0X4-01A	Breast	HR-WT	NA	GRCh38	2	Neutral	NA
TCGA-B6-A0X5-01A	Breast	HR-WT	NA	GRCh38	2	Neutral	NA
TCGA-BH-A0BW-01A	Breast	HR-WT	NA	GRCh38	2	Neutral	NA
TCGA-BH-A0DE-01A	Breast	HR-WT	NA	GRCh38	2	Neutral	NA
TCGA-BH-A0DH-01A	Breast	HR-WT	NA	GRCh38	2	Neutral	NA
TCGA-BH-A0DZ-01A	Breast	HR-WT	NA	GRCh38	2	Neutral	NA
TCGA-BH-A0E7-01A	Breast	HR-WT	NA	GRCh38	2	Neutral	NA
TCGA-BH-A0EI-01A	Breast	HR-WT	NA	GRCh38	2	Neutral	NA
TCGA-BH-A0H5-01A	Breast	HR-WT	NA	GRCh38	2	Neutral	NA
TCGA-BH-A0H6-01A	Breast	HR-WT	NA	GRCh38	2	Neutral	NA
TCGA-BH-A0W5-01A	Breast	HR-WT	NA	GRCh38	2	Neutral	NA
TCGA-BH-A0W7-01A	Breast	HR-WT	NA	GRCh38	2	Neutral	NA
TCGA-BH-A1FC-01A	Breast	HR-WT	NA	GRCh38	2	Neutral	NA
TCGA-BH-A1FD-01A	Breast	HR-WT	NA	GRCh38	2	Neutral	NA
TCGA-BH-A1FE-01A	Breast	HR-WT	NA	GRCh38	2	Neutral	NA
TCGA-BH-A1FG-01A	Breast	HR-WT	NA	GRCh38	2	Neutral	NA
TCGA-BH-A1FR-01A	Breast	HR-WT	NA	GRCh38	2	Neutral	NA
TCGA-BH-A42V-01A	Breast	HR-WT	NA	GRCh38	2	Neutral	NA
TCGA-BH-A5IZ-01A	Breast	HR-WT	NA	GRCh38	2	Neutral	NA
TCGA-C8-A12M-01A	Breast	HR-WT	NA	GRCh38	2	Neutral	NA
TCGA-C8-A12N-01A	Breast	HR-WT	NA	GRCh38	2	Neutral	NA
TCGA-C8-A12Q-01A	Breast	HR-WT	NA	GRCh38	2	Neutral	NA
TCGA-C8-A12T-01A	Breast	HR-WT	NA	GRCh38	2	Neutral	NA
TCGA-C8-A134-01A	Breast	HR-WT	NA	GRCh38	2	Neutral	NA
TCGA-C8-A137-01A	Breast	HR-WT	NA	GRCh38	2	Neutral	NA
TCGA-C8-A26W-01A	Breast	HR-WT	NA	GRCh38	2	Neutral	NA
TCGA-D8-A1JH-01A	Breast	HR-WT	NA	GRCh38	2	Neutral	NA
TCGA-D8-A1JL-01A	Breast	HR-WT	NA	GRCh38	2	Neutral	NA
TCGA-D8-A4Z1-01A	Breast	HR-WT	NA	GRCh38	2	Neutral	NA
TCGA-E2-A14S-01A	Breast	HR-WT	NA	GRCh38	2	Neutral	NA
TCGA-E2-A155-01A	Breast	HR-WT	NA	GRCh38	2	Neutral	NA
TCGA-E2-A156-01A	Breast	HR-WT	NA	GRCh38	2	Neutral	NA
TCGA-E2-A159-01A	Breast	HR-WT	NA	GRCh38	2	Neutral	NA
TCGA-E2-A15C-01A	Breast	HR-WT	NA	GRCh38	2	Neutral	NA
TCGA-E2-A15O-01A	Breast	HR-WT	NA	GRCh38	2	Neutral	NA
TCGA-E2-A15P-01A	Breast	HR-WT	NA	GRCh38	2	Neutral	NA
TCGA-E2-A1B1-01A	Breast	HR-WT	NA	GRCh38	2	Neutral	NA
TCGA-E2-A1B4-01A	Breast	HR-WT	NA	GRCh38	2	Neutral	NA
TCGA-E2-A1B6-01A	Breast	HR-WT	NA	GRCh38	2	Neutral	NA
TCGA-E2-A1BC-01A	Breast	HR-WT	NA	GRCh38	2	Neutral	NA
TCGA-E2-A1IK-01A	Breast	HR-WT	NA	GRCh38	2	Neutral	NA
TCGA-E2-A1IU-01A	Breast	HR-WT	NA	GRCh38	2	Neutral	NA
TCGA-E2-A1LA-01A	Breast	HR-WT	NA	GRCh38	2	Neutral	NA
TCGA-E2-A1LB-01A	Breast	HR-WT	NA	GRCh38	2	Neutral	NA
TCGA-E2-A1LE-01A	Breast	HR-WT	NA	GRCh38	2	Neutral	NA
TCGA-E9-A1N4-01A	Breast	HR-WT	NA	GRCh38	2	Neutral	NA
TCGA-E9-A1NG-01A	Breast	HR-WT	NA	GRCh38	2	Neutral	NA
TCGA-E9-A1R0-01A	Breast	HR-WT	NA	GRCh38	2	Neutral	NA
TCGA-E9-A228-01A	Breast	HR-WT	NA	GRCh38	2	Neutral	NA
TCGA-E9-A2JT-01A	Breast	HR-WT	NA	GRCh38	2	Neutral	NA
TCGA-E9-A54X-01A	Breast	HR-WT	NA	GRCh38	2	Neutral	NA
TCGA-E9-A5UO-01A	Breast	HR-WT	NA	GRCh38	2	Neutral	NA
TCGA-EW-A1IX-01A	Breast	HR-WT	NA	GRCh38	2	Neutral	NA
TCGA-EW-A1J6-01A	Breast	HR-WT	NA	GRCh38	2	Neutral	NA
TCGA-EW-A1P6-01A	Breast	HR-WT	NA	GRCh38	2	Neutral	NA
TCGA-EW-A1PA-01A	Breast	HR-WT	NA	GRCh38	2	Neutral	NA
TCGA-EW-A3E8-01B	Breast	HR-WT	NA	GRCh38	2	Neutral	NA
TCGA-GM-A2DA-01A	Breast	HR-WT	NA	GRCh38	2	Neutral	NA
TCGA-GM-A2DK-01A	Breast	HR-WT	NA	GRCh38	2	Neutral	NA
TCGA-GM-A3XG-01A	Breast	HR-WT	NA	GRCh38	2	Neutral	NA
TCGA-GM-A5PV-01A	Breast	HR-WT	NA	GRCh38	2	Neutral	NA
TCGA-OL-A5D6-01A	Breast	HR-WT	NA	GRCh38	2	Neutral	NA
TCGA-OL-A5D8-01A	Breast	HR-WT	NA	GRCh38	2	Neutral	NA
TCGA-OL-A66H-01A	Breast	HR-WT	NA	GRCh38	2	Neutral	NA
TCGA-OL-A66J-01A	Breast	HR-WT	NA	GRCh38	2	Neutral	NA
TCGA-10-0931-01A	Ovarian	gBRCA1/2	BRCA1	GRCh38	2	Neutral	NA
TCGA-13-0893-01B	Ovarian	gBRCA1/2	BRCA1	GRCh38	2	Neutral	NA
TCGA-13-1498-01A	Ovarian	gBRCA1/2	BRCA2	GRCh38	2	Neutral	NA
TCGA-13-1499-01A	Ovarian	gBRCA1/2	BRCA2	GRCh38	2	Neutral	NA
TCGA-13-1512-01A	Ovarian	gBRCA1/2	BRCA1	GRCh38	2	Neutral	NA
TCGA-23-1029-01B	Ovarian	gBRCA1/2	BRCA2	GRCh38	2	Neutral	NA
TCGA-23-2079-01A	Ovarian	gBRCA1/2	BRCA1	GRCh38	2	Neutral	NA
TCGA-24-1103-01A	Ovarian	gBRCA1/2	BRCA1	GRCh38	2	Neutral	NA
TCGA-24-1463-01A	Ovarian	gBRCA1/2	BRCA2	GRCh38	2	Neutral	NA
TCGA-24-1470-01A	Ovarian	gBRCA1/2	BRCA1	GRCh38	2	Neutral	NA
TCGA-24-1849-01A	Ovarian	gBRCA1/2	BRCA2	GRCh38	2	Neutral	NA
TCGA-29-1696-01A	Ovarian	gBRCA1/2	BRCA1	GRCh38	2	Neutral	NA
TCGA-42-2582-01A	Ovarian	gBRCA1/2	BRCA1	GRCh38	2	Neutral	NA
TCGA-59-2350-01A	Ovarian	gBRCA1/2	BRCA2	GRCh38	2	Neutral	NA
TCGA-61-2610-02A	Ovarian	gBRCA1/2	BRCA1	GRCh38	2	Neutral	NA
TCGA-13-0793-01A	Ovarian	gBRCA1/2	BRCA2	GRCh37	2	Neutral	NA
TCGA-10-0934-01A	Ovarian	HR-WT	NA	GRCh38	2	Neutral	NA
TCGA-13-0804-01A	Ovarian	HR-WT	NA	GRCh38	2	Neutral	NA
TCGA-13-0807-01B	Ovarian	HR-WT	NA	GRCh38	2	Neutral	NA
TCGA-13-0897-01A	Ovarian	HR-WT	NA	GRCh38	2	Neutral	NA
TCGA-13-0924-01A	Ovarian	HR-WT	NA	GRCh38	2	Neutral	NA
TCGA-13-1412-01A	Ovarian	HR-WT	NA	GRCh38	2	Neutral	NA
TCGA-13-1482-01A	Ovarian	HR-WT	NA	GRCh38	2	Neutral	NA
TCGA-13-1491-01A	Ovarian	HR-WT	NA	GRCh38	2	Neutral	NA
TCGA-13-1511-01A	Ovarian	HR-WT	NA	GRCh38	2	Neutral	NA
TCGA-24-0966-01A	Ovarian	HR-WT	NA	GRCh38	2	Neutral	NA
TCGA-24-0970-01B	Ovarian	HR-WT	NA	GRCh38	2	Neutral	NA
TCGA-24-0980-01A	Ovarian	HR-WT	NA	GRCh38	2	Neutral	NA
TCGA-24-1434-01A	Ovarian	HR-WT	NA	GRCh38	2	Neutral	NA
TCGA-24-1551-01A	Ovarian	HR-WT	NA	GRCh38	2	Neutral	NA
TCGA-24-2254-01A	Ovarian	HR-WT	NA	GRCh38	2	Neutral	NA
TCGA-24-2262-01A	Ovarian	HR-WT	NA	GRCh38	2	Neutral	NA
TCGA-25-1322-01A	Ovarian	HR-WT	NA	GRCh38	2	Neutral	NA
TCGA-25-1328-01A	Ovarian	HR-WT	NA	GRCh38	2	Neutral	NA
TCGA-29-1705-01A	Ovarian	HR-WT	NA	GRCh38	2	Neutral	NA
TCGA-29-1711-01A	Ovarian	HR-WT	NA	GRCh38	2	Neutral	NA
TCGA-29-1785-01A	Ovarian	HR-WT	NA	GRCh38	2	Neutral	NA
TCGA-59-2354-01A	Ovarian	HR-WT	NA	GRCh38	2	Neutral	NA
TCGA-61-1736-01B	Ovarian	HR-WT	NA	GRCh38	2	Neutral	NA
TCGA-61-2002-01A	Ovarian	HR-WT	NA	GRCh38	2	Neutral	NA
TCGA-13-0891-01A	Ovarian	HR-WT	NA	GRCh38	2	Neutral	NA
TCGA-13-0899-01A	Ovarian	HR-WT	NA	GRCh38	2	Neutral	NA
TCGA-13-0904-01A	Ovarian	HR-WT	NA	GRCh38	2	Neutral	NA
TCGA-A1-A0SH-01A	Breast	gBRCA1/2	BRCA1	GRCh38	3	Neutral	NA
TCGA-A2-A25E-01A	Breast	gBRCA1/2	BRCA2	GRCh38	3	Neutral	NA
TCGA-AN-A0FL-01A	Breast	gBRCA1/2	BRCA1	GRCh38	3	Neutral	NA
TCGA-AR-A2LN-01A	Breast	gBRCA1/2	BRCA2	GRCh38	3	Neutral	NA
TCGA-BH-A0AZ-01A	Breast	gBRCA1/2	BRCA2	GRCh38	3	Neutral	NA
TCGA-C8-A12K-01A	Breast	gBRCA1/2	BRCA1	GRCh38	3	Neutral	NA
TCGA-EW-A1P4-01A	Breast	gBRCA1/2	BRCA1	GRCh38	3	Neutral	NA
TCGA-A1-A0SQ-01A	Breast	HR-WT	NA	GRCh38	3	Neutral	NA
TCGA-A2-A0CK-01A	Breast	HR-WT	NA	GRCh38	3	Neutral	NA
TCGA-A2-A0CO-01A	Breast	HR-WT	NA	GRCh38	3	Neutral	NA
TCGA-A2-A0CU-01A	Breast	HR-WT	NA	GRCh38	3	Neutral	NA
TCGA-A2-A0D0-01A	Breast	HR-WT	NA	GRCh38	3	Neutral	NA
TCGA-A2-A0EN-01A	Breast	HR-WT	NA	GRCh38	3	Neutral	NA
TCGA-A2-A0SY-01A	Breast	HR-WT	NA	GRCh38	3	Neutral	NA
TCGA-A2-A0T1-01A	Breast	HR-WT	NA	GRCh38	3	Neutral	NA
TCGA-A2-A0T4-01A	Breast	HR-WT	NA	GRCh38	3	Neutral	NA
TCGA-A2-A0YC-01A	Breast	HR-WT	NA	GRCh38	3	Neutral	NA
TCGA-A2-A0YG-01A	Breast	HR-WT	NA	GRCh38	3	Neutral	NA
TCGA-A2-A0YI-01A	Breast	HR-WT	NA	GRCh38	3	Neutral	NA
TCGA-A2-A0YK-01A	Breast	HR-WT	NA	GRCh38	3	Neutral	NA
TCGA-A2-A0YL-01A	Breast	HR-WT	NA	GRCh38	3	Neutral	NA
TCGA-A2-A1G0-01A	Breast	HR-WT	NA	GRCh38	3	Neutral	NA
TCGA-A2-A25C-01A	Breast	HR-WT	NA	GRCh38	3	Neutral	NA
TCGA-A2-A4S1-01A	Breast	HR-WT	NA	GRCh38	3	Neutral	NA
TCGA-A7-A13D-01B	Breast	HR-WT	NA	GRCh38	3	Neutral	NA
TCGA-A7-A26G-01A	Breast	HR-WT	NA	GRCh38	3	Neutral	NA
TCGA-A7-A3IZ-01A	Breast	HR-WT	NA	GRCh38	3	Neutral	NA
TCGA-A7-A3J0-01A	Breast	HR-WT	NA	GRCh38	3	Neutral	NA
TCGA-A7-A3J1-01A	Breast	HR-WT	NA	GRCh38	3	Neutral	NA
TCGA-A7-A426-01A	Breast	HR-WT	NA	GRCh38	3	Neutral	NA
TCGA-A7-A4SA-01A	Breast	HR-WT	NA	GRCh38	3	Neutral	NA
TCGA-A8-A07I-01A	Breast	HR-WT	NA	GRCh38	3	Neutral	NA
TCGA-A8-A091-01A	Breast	HR-WT	NA	GRCh38	3	Neutral	NA
TCGA-A8-A094-01A	Breast	HR-WT	NA	GRCh38	3	Neutral	NA
TCGA-A8-A096-01A	Breast	HR-WT	NA	GRCh38	3	Neutral	NA
TCGA-A8-A09G-01A	Breast	HR-WT	NA	GRCh38	3	Neutral	NA
TCGA-A8-A09Z-01A	Breast	HR-WT	NA	GRCh38	3	Neutral	NA
TCGA-A8-A0A1-01A	Breast	HR-WT	NA	GRCh38	3	Neutral	NA
TCGA-A8-A0A4-01A	Breast	HR-WT	NA	GRCh38	3	Neutral	NA
TCGA-AC-A2FO-01A	Breast	HR-WT	NA	GRCh38	3	Neutral	NA
TCGA-AC-A3HN-01A	Breast	HR-WT	NA	GRCh38	3	Neutral	NA
TCGA-AC-A3W7-01A	Breast	HR-WT	NA	GRCh38	3	Neutral	NA
TCGA-AN-A0AR-01A	Breast	HR-WT	NA	GRCh38	3	Neutral	NA
TCGA-AN-A0FJ-01A	Breast	HR-WT	NA	GRCh38	3	Neutral	NA
TCGA-AN-A0XR-01A	Breast	HR-WT	NA	GRCh38	3	Neutral	NA
TCGA-AN-A0XS-01A	Breast	HR-WT	NA	GRCh38	3	Neutral	NA
TCGA-AO-A03R-01A	Breast	HR-WT	NA	GRCh38	3	Neutral	NA
TCGA-AO-A03T-01A	Breast	HR-WT	NA	GRCh38	3	Neutral	NA
TCGA-AO-A0J3-01A	Breast	HR-WT	NA	GRCh38	3	Neutral	NA
TCGA-AO-A0JE-01A	Breast	HR-WT	NA	GRCh38	3	Neutral	NA
TCGA-AO-A0JF-01A	Breast	HR-WT	NA	GRCh38	3	Neutral	NA
TCGA-AO-A0JJ-01A	Breast	HR-WT	NA	GRCh38	3	Neutral	NA
TCGA-AO-A1KP-01A	Breast	HR-WT	NA	GRCh38	3	Neutral	NA
TCGA-AQ-A1H3-01A	Breast	HR-WT	NA	GRCh38	3	Neutral	NA
TCGA-AR-A0U2-01A	Breast	HR-WT	NA	GRCh38	3	Neutral	NA
TCGA-AR-A1AP-01A	Breast	HR-WT	NA	GRCh38	3	Neutral	NA
TCGA-AR-A1AU-01A	Breast	HR-WT	NA	GRCh38	3	Neutral	NA
TCGA-AR-A24L-01A	Breast	HR-WT	NA	GRCh38	3	Neutral	NA
TCGA-AR-A24R-01A	Breast	HR-WT	NA	GRCh38	3	Neutral	NA
TCGA-AR-A24T-01A	Breast	HR-WT	NA	GRCh38	3	Neutral	NA
TCGA-AR-A252-01A	Breast	HR-WT	NA	GRCh38	3	Neutral	NA
TCGA-AR-A2LQ-01A	Breast	HR-WT	NA	GRCh38	3	Neutral	NA
TCGA-AR-A2LR-01A	Breast	HR-WT	NA	GRCh38	3	Neutral	NA
TCGA-B6-A0IE-01A	Breast	HR-WT	NA	GRCh38	3	Neutral	NA
TCGA-B6-A0IN-01A	Breast	HR-WT	NA	GRCh38	3	Neutral	NA
TCGA-B6-A0RI-01A	Breast	HR-WT	NA	GRCh38	3	Neutral	NA
TCGA-B6-A0RQ-01A	Breast	HR-WT	NA	GRCh38	3	Neutral	NA
TCGA-B6-A0WT-01A	Breast	HR-WT	NA	GRCh38	3	Neutral	NA
TCGA-B6-A0WY-01A	Breast	HR-WT	NA	GRCh38	3	Neutral	NA
TCGA-B6-A0WZ-01A	Breast	HR-WT	NA	GRCh38	3	Neutral	NA
TCGA-B6-A400-01A	Breast	HR-WT	NA	GRCh38	3	Neutral	NA
TCGA-B6-A40B-01A	Breast	HR-WT	NA	GRCh38	3	Neutral	NA
TCGA-BH-A0B0-01A	Breast	HR-WT	NA	GRCh38	3	Neutral	NA
TCGA-BH-A0BC-01A	Breast	HR-WT	NA	GRCh38	3	Neutral	NA
TCGA-BH-A0BO-01A	Breast	HR-WT	NA	GRCh38	3	Neutral	NA
TCGA-BH-A0BP-01A	Breast	HR-WT	NA	GRCh38	3	Neutral	NA
TCGA-BH-A0BS-01A	Breast	HR-WT	NA	GRCh38	3	Neutral	NA
TCGA-BH-A0C3-01A	Breast	HR-WT	NA	GRCh38	3	Neutral	NA
TCGA-BH-A0DI-01A	Breast	HR-WT	NA	GRCh38	3	Neutral	NA
TCGA-BH-A0DK-01A	Breast	HR-WT	NA	GRCh38	3	Neutral	NA
TCGA-BH-A0DQ-01A	Breast	HR-WT	NA	GRCh38	3	Neutral	NA
TCGA-BH-A0DX-01A	Breast	HR-WT	NA	GRCh38	3	Neutral	NA
TCGA-BH-A0E0-01A	Breast	HR-WT	NA	GRCh38	3	Neutral	NA
TCGA-BH-A0GZ-01A	Breast	HR-WT	NA	GRCh38	3	Neutral	NA
TCGA-BH-A0HI-01A	Breast	HR-WT	NA	GRCh38	3	Neutral	NA
TCGA-BH-A0HO-01A	Breast	HR-WT	NA	GRCh38	3	Neutral	NA
TCGA-BH-A0HP-01A	Breast	HR-WT	NA	GRCh38	3	Neutral	NA
TCGA-BH-A18N-01A	Breast	HR-WT	NA	GRCh38	3	Neutral	NA
TCGA-BH-A1EY-01A	Breast	HR-WT	NA	GRCh38	3	Neutral	NA
TCGA-BH-A201-01A	Breast	HR-WT	NA	GRCh38	3	Neutral	NA
TCGA-BH-A208-01A	Breast	HR-WT	NA	GRCh38	3	Neutral	NA
TCGA-C8-A1HE-01A	Breast	HR-WT	NA	GRCh38	3	Neutral	NA
TCGA-C8-A1HG-01A	Breast	HR-WT	NA	GRCh38	3	Neutral	NA
TCGA-C8-A26V-01A	Breast	HR-WT	NA	GRCh38	3	Neutral	NA
TCGA-C8-A273-01A	Breast	HR-WT	NA	GRCh38	3	Neutral	NA
TCGA-C8-A275-01A	Breast	HR-WT	NA	GRCh38	3	Neutral	NA
TCGA-D8-A1JA-01A	Breast	HR-WT	NA	GRCh38	3	Neutral	NA
TCGA-D8-A1JG-01B	Breast	HR-WT	NA	GRCh38	3	Neutral	NA
TCGA-D8-A1JM-01A	Breast	HR-WT	NA	GRCh38	3	Neutral	NA
TCGA-D8-A1JN-01A	Breast	HR-WT	NA	GRCh38	3	Neutral	NA
TCGA-D8-A1JS-01A	Breast	HR-WT	NA	GRCh38	3	Neutral	NA
TCGA-D8-A27P-01A	Breast	HR-WT	NA	GRCh38	3	Neutral	NA
TCGA-E2-A14Q-01A	Breast	HR-WT	NA	GRCh38	3	Neutral	NA
TCGA-E2-A14Y-01A	Breast	HR-WT	NA	GRCh38	3	Neutral	NA
TCGA-E2-A15L-01A	Breast	HR-WT	NA	GRCh38	3	Neutral	NA
TCGA-E2-A15T-01A	Breast	HR-WT	NA	GRCh38	3	Neutral	NA
TCGA-E2-A1AZ-01A	Breast	HR-WT	NA	GRCh38	3	Neutral	NA
TCGA-E2-A1IG-01A	Breast	HR-WT	NA	GRCh38	3	Neutral	NA
TCGA-E2-A1IL-01A	Breast	HR-WT	NA	GRCh38	3	Neutral	NA
TCGA-E2-A1L6-01A	Breast	HR-WT	NA	GRCh38	3	Neutral	NA
TCGA-E9-A1R4-01A	Breast	HR-WT	NA	GRCh38	3	Neutral	NA
TCGA-E9-A1R6-01A	Breast	HR-WT	NA	GRCh38	3	Neutral	NA
TCGA-E9-A1RH-01A	Breast	HR-WT	NA	GRCh38	3	Neutral	NA
TCGA-E9-A227-01A	Breast	HR-WT	NA	GRCh38	3	Neutral	NA
TCGA-E9-A22A-01A	Breast	HR-WT	NA	GRCh38	3	Neutral	NA
TCGA-E9-A22H-01A	Breast	HR-WT	NA	GRCh38	3	Neutral	NA
TCGA-E9-A245-01A	Breast	HR-WT	NA	GRCh38	3	Neutral	NA
TCGA-E9-A5FL-01A	Breast	HR-WT	NA	GRCh38	3	Neutral	NA
TCGA-EW-A1IW-01A	Breast	HR-WT	NA	GRCh38	3	Neutral	NA
TCGA-EW-A1P0-01A	Breast	HR-WT	NA	GRCh38	3	Neutral	NA
TCGA-EW-A1P3-01A	Breast	HR-WT	NA	GRCh38	3	Neutral	NA
TCGA-EW-A2FW-01A	Breast	HR-WT	NA	GRCh38	3	Neutral	NA
TCGA-GM-A2DI-01A	Breast	HR-WT	NA	GRCh38	3	Neutral	NA
TCGA-HN-A2OB-01A	Breast	HR-WT	NA	GRCh38	3	Neutral	NA
TCGA-LL-A440-01A	Breast	HR-WT	NA	GRCh38	3	Neutral	NA
TCGA-LL-A50Y-01A	Breast	HR-WT	NA	GRCh38	3	Neutral	NA
TCGA-LQ-A4E4-01A	Breast	HR-WT	NA	GRCh38	3	Neutral	NA
TCGA-OL-A5DA-01A	Breast	HR-WT	NA	GRCh38	3	Neutral	NA
TCGA-OL-A5RV-01A	Breast	HR-WT	NA	GRCh38	3	Neutral	NA
TCGA-B6-A0RU-01A	Breast	HR-WT	NA	GRCh38	3	Neutral	NA
TCGA-09-2045-01A	Ovarian	gBRCA1/2	BRCA1	GRCh38	3	Neutral	NA
TCGA-13-0726-01A	Ovarian	gBRCA1/2	BRCA2	GRCh38	3	Neutral	NA
TCGA-20-1685-01A	Ovarian	gBRCA1/2	BRCA2	GRCh38	3	Neutral	NA
TCGA-20-1687-01A	Ovarian	gBRCA1/2	BRCA1	GRCh38	3	Neutral	NA
TCGA-23-1027-01A	Ovarian	gBRCA1/2	BRCA1	GRCh38	3	Neutral	NA
TCGA-24-1417-01A	Ovarian	gBRCA1/2	BRCA2	GRCh38	3	Neutral	NA
TCGA-24-2024-01A	Ovarian	gBRCA1/2	BRCA2	GRCh38	3	Neutral	NA
TCGA-24-2298-01A	Ovarian	gBRCA1/2	BRCA1	GRCh38	3	Neutral	NA
TCGA-25-2404-01A	Ovarian	gBRCA1/2	BRCA2	GRCh38	3	Neutral	NA
TCGA-29-1691-01A	Ovarian	gBRCA1/2	BRCA1	GRCh38	3	Neutral	NA
TCGA-29-1784-01A	Ovarian	gBRCA1/2	BRCA2	GRCh38	3	Neutral	NA
TCGA-59-2348-01A	Ovarian	gBRCA1/2	BRCA1	GRCh38	3	Neutral	NA
TCGA-13-0883-01A	Ovarian	gBRCA1/2	BRCA1	GRCh37	3	Neutral	NA
TCGA-23-1118-01A	Ovarian	gBRCA1/2	BRCA1	GRCh38	3	Neutral	NA
TCGA-04-1343-01A	Ovarian	HR-WT	NA	GRCh38	3	Neutral	NA
TCGA-04-1349-01A	Ovarian	HR-WT	NA	GRCh38	3	Neutral	NA
TCGA-09-0366-01A	Ovarian	HR-WT	NA	GRCh38	3	Neutral	NA
TCGA-09-0369-01A	Ovarian	HR-WT	NA	GRCh38	3	Neutral	NA
TCGA-10-0926-01A	Ovarian	HR-WT	NA	GRCh38	3	Neutral	NA
TCGA-10-0927-01A	Ovarian	HR-WT	NA	GRCh38	3	Neutral	NA
TCGA-13-0755-01A	Ovarian	HR-WT	NA	GRCh38	3	Neutral	NA
TCGA-13-0910-01A	Ovarian	HR-WT	NA	GRCh38	3	Neutral	NA
TCGA-13-1411-01A	Ovarian	HR-WT	NA	GRCh38	3	Neutral	NA
TCGA-13-1477-01A	Ovarian	HR-WT	NA	GRCh38	3	Neutral	NA
TCGA-13-1487-01A	Ovarian	HR-WT	NA	GRCh38	3	Neutral	NA
TCGA-13-1496-01A	Ovarian	HR-WT	NA	GRCh38	3	Neutral	NA
TCGA-13-1497-01A	Ovarian	HR-WT	NA	GRCh38	3	Neutral	NA
TCGA-13-1507-01A	Ovarian	HR-WT	NA	GRCh38	3	Neutral	NA
TCGA-13-A5FT-01A	Ovarian	HR-WT	NA	GRCh38	3	Neutral	NA
TCGA-20-0987-01A	Ovarian	HR-WT	NA	GRCh38	3	Neutral	NA
TCGA-20-0990-01A	Ovarian	HR-WT	NA	GRCh38	3	Neutral	NA
TCGA-23-1022-01A	Ovarian	HR-WT	NA	GRCh38	3	Neutral	NA
TCGA-23-1032-01A	Ovarian	HR-WT	NA	GRCh38	3	Neutral	NA
TCGA-23-1110-01A	Ovarian	HR-WT	NA	GRCh38	3	Neutral	NA
TCGA-23-1116-01A	Ovarian	HR-WT	NA	GRCh38	3	Neutral	NA
TCGA-23-1124-01A	Ovarian	HR-WT	NA	GRCh38	3	Neutral	NA
TCGA-24-0979-01A	Ovarian	HR-WT	NA	GRCh38	3	Neutral	NA
TCGA-24-1425-01A	Ovarian	HR-WT	NA	GRCh38	3	Neutral	NA
TCGA-24-1552-01A	Ovarian	HR-WT	NA	GRCh38	3	Neutral	NA
TCGA-24-1565-01A	Ovarian	HR-WT	NA	GRCh38	3	Neutral	NA
TCGA-24-1843-01A	Ovarian	HR-WT	NA	GRCh38	3	Neutral	NA
TCGA-24-1850-01A	Ovarian	HR-WT	NA	GRCh38	3	Neutral	NA
TCGA-24-2019-01A	Ovarian	HR-WT	NA	GRCh38	3	Neutral	NA
TCGA-24-2030-01A	Ovarian	HR-WT	NA	GRCh38	3	Neutral	NA
TCGA-24-2033-01A	Ovarian	HR-WT	NA	GRCh38	3	Neutral	NA
TCGA-24-2260-01A	Ovarian	HR-WT	NA	GRCh38	3	Neutral	NA
TCGA-24-2289-01A	Ovarian	HR-WT	NA	GRCh38	3	Neutral	NA
TCGA-25-1312-01A	Ovarian	HR-WT	NA	GRCh38	3	Neutral	NA
TCGA-25-1313-01A	Ovarian	HR-WT	NA	GRCh38	3	Neutral	NA
TCGA-25-2393-01A	Ovarian	HR-WT	NA	GRCh38	3	Neutral	NA
TCGA-25-2408-01A	Ovarian	HR-WT	NA	GRCh38	3	Neutral	NA
TCGA-29-1690-01A	Ovarian	HR-WT	NA	GRCh38	3	Neutral	NA
TCGA-30-1853-01A	Ovarian	HR-WT	NA	GRCh38	3	Neutral	NA
TCGA-31-1950-01A	Ovarian	HR-WT	NA	GRCh38	3	Neutral	NA
TCGA-61-1919-01A	Ovarian	HR-WT	NA	GRCh38	3	Neutral	NA
TCGA-61-2092-01A	Ovarian	HR-WT	NA	GRCh38	3	Neutral	NA
TCGA-A2-A0T0-01A	Breast	gBRCA1/2	BRCA2	GRCh38	4	Gain	chr1:208948331-248918526
TCGA-E2-A15S-01A	Breast	gBRCA1/2	BRCA2	GRCh38	4	Gain	chr1:175160809-234410499
TCGA-HN-A2NL-01A	Breast	gBRCA1/2	BRCA2	GRCh38	4	Gain	chr1:214652852-248488626
TCGA-BH-A0BZ-01A	Breast	gBRCA1/2	BRCA2	GRCh37	4	Gain	chr1:192544794-249110906
TCGA-E2-A14N-01A	Breast	gBRCA1/2	BRCA1	GRCh37	4	Gain	chr1:149206383-234040742
TCGA-A1-A0SM-01A	Breast	HR-WT	NA	GRCh38	4	Gain	chr1:207888914-248909506
TCGA-A2-A04W-01A	Breast	HR-WT	NA	GRCh38	4	Gain	chr1:144054586-248855287
TCGA-A2-A0CQ-01A	Breast	HR-WT	NA	GRCh38	4	Gain	chr1:207124138-248918526
TCGA-A2-A0CT-01A	Breast	HR-WT	NA	GRCh38	4	Gain	chr1:219532984-245282943
TCGA-A2-A0EM-01A	Breast	HR-WT	NA	GRCh38	4	Gain	chr1:149482659-247770270
TCGA-A2-A0EQ-01A	Breast	HR-WT	NA	GRCh38	4	Gain	chr1:181715468-229689304
TCGA-A2-A0EU-01A	Breast	HR-WT	NA	GRCh38	4	Gain	chr1:199752829-248856131
TCGA-A2-A0YM-01A	Breast	HR-WT	NA	GRCh38	4	Gain	chr1:225777824-248816707
TCGA-A2-A1FV-01A	Breast	HR-WT	NA	GRCh38	4	Gain	chr1:225838675-248650825
TCGA-A2-A1FW-01A	Breast	HR-WT	NA	GRCh38	4	Gain	chr1:225511978-242365492
TCGA-A2-A1FZ-01A	Breast	HR-WT	NA	GRCh38	4	Gain	chr1:125081163-248816707
TCGA-A2-A3KD-01A	Breast	HR-WT	NA	GRCh38	4	Gain	chr1:143554608-248936569
TCGA-A2-A3XU-01A	Breast	HR-WT	NA	GRCh38	4	Gain	chr1:143498871-248937246
TCGA-A2-A3XY-01A	Breast	HR-WT	NA	GRCh38	4	Gain	chr1:169790228-233671723
TCGA-A2-A4RX-01A	Breast	HR-WT	NA	GRCh38	4	Gain	chr1:149078754-248936765
TCGA-A7-A0CG-01A	Breast	HR-WT	NA	GRCh38	4	Gain	chr1:173188624-248936885
TCGA-A7-A13G-01A	Breast	HR-WT	NA	GRCh38	4	Gain	chr1:200974928-247433951
TCGA-A7-A13H-01A	Breast	HR-WT	NA	GRCh38	4	Gain	chr1:214889400-248936865
TCGA-A7-A26J-01A	Breast	HR-WT	NA	GRCh38	4	Gain	chr1:226297903-234471463
TCGA-A7-A2KD-01A	Breast	HR-WT	NA	GRCh38	4	Gain	chr1:149909310-248937246
TCGA-A7-A4SD-01A	Breast	HR-WT	NA	GRCh38	4	Gain	chr1:125066652-248937246
TCGA-A7-A4SF-01A	Breast	HR-WT	NA	GRCh38	4	Gain	chr1:154859448-248928736
TCGA-A7-A5ZX-01A	Breast	HR-WT	NA	GRCh38	4	Gain	chr1:146964075-248856131
TCGA-A8-A06T-01A	Breast	HR-WT	NA	GRCh38	4	Gain	chr1:214629046-248918526
TCGA-A8-A06Z-01A	Breast	HR-WT	NA	GRCh38	4	Gain	chr1:214483346-230767488
TCGA-A8-A07O-01A	Breast	HR-WT	NA	GRCh38	4	Gain	chr1:220317469-236838732
TCGA-A8-A081-01A	Breast	HR-WT	NA	GRCh38	4	Gain	chr1:214532332-248936569
TCGA-A8-A08O-01A	Breast	HR-WT	NA	GRCh38	4	Gain	chr1:214483353-248855670
TCGA-A8-A08T-01A	Breast	HR-WT	NA	GRCh38	4	Gain	chr1:214613291-248856131
TCGA-A8-A08Z-01A	Breast	HR-WT	NA	GRCh38	4	Gain	chr1:207485161-248847255
TCGA-A8-A090-01A	Breast	HR-WT	NA	GRCh38	4	Gain	chr1:214613093-248083888
TCGA-A8-A099-01A	Breast	HR-WT	NA	GRCh38	4	Gain	chr1:215086808-228317998
TCGA-A8-A09K-01A	Breast	HR-WT	NA	GRCh38	4	Gain	chr1:214483324-227317312
TCGA-A8-A09T-01A	Breast	HR-WT	NA	GRCh38	4	Gain	chr1:214483324-243330605
TCGA-A8-A09X-01A	Breast	HR-WT	NA	GRCh38	4	Gain	chr1:200581432-248650825
TCGA-A8-A0A7-01A	Breast	HR-WT	NA	GRCh38	4	Gain	chr1:214532332-248407139
TCGA-A8-A0A9-01A	Breast	HR-WT	NA	GRCh38	4	Gain	chr1:225708103-248121595
TCGA-AC-A2FB-01A	Breast	HR-WT	NA	GRCh38	4	Gain	chr1:143523597-248855287
TCGA-AC-A2FG-01A	Breast	HR-WT	NA	GRCh38	4	Gain	chr1:143263449-248816707
TCGA-AC-A2FM-01A	Breast	HR-WT	NA	GRCh38	4	Gain	chr1:220791743-248811727
TCGA-AC-A2QI-01A	Breast	HR-WT	NA	GRCh38	4	Gain	chr1:125119761-248816707
TCGA-AC-A3YI-01A	Breast	HR-WT	NA	GRCh38	4	Gain	chr1:143905563-248918260
TCGA-AC-A5XS-01A	Breast	HR-WT	NA	GRCh38	4	Gain	chr1:160486921-248816707
TCGA-AN-A03X-01A	Breast	HR-WT	NA	GRCh38	4	Gain	chr1:214483346-248406068
TCGA-AN-A04A-01A	Breast	HR-WT	NA	GRCh38	4	Gain	chr1:214483353-248816707
TCGA-AN-A0AM-01A	Breast	HR-WT	NA	GRCh38	4	Gain	chr1:173363489-227924420
TCGA-AN-A0FV-01A	Breast	HR-WT	NA	GRCh38	4	Gain	chr1:224371109-245915174
TCGA-AN-A0FY-01A	Breast	HR-WT	NA	GRCh38	4	Gain	chr1:161595914-248812149
TCGA-AN-A0XO-01A	Breast	HR-WT	NA	GRCh38	4	Gain	chr1:225803390-228425351
TCGA-AN-A0XT-01A	Breast	HR-WT	NA	GRCh38	4	Gain	chr1:214613786-248917420
TCGA-AO-A0J5-01A	Breast	HR-WT	NA	GRCh38	4	Gain	chr1:214655089-248349721
TCGA-AO-A0J7-01A	Breast	HR-WT	NA	GRCh38	4	Gain	chr1:214483324-248682054
TCGA-AO-A0J8-01A	Breast	HR-WT	NA	GRCh38	4	Gain	chr1:125180322-248857802
TCGA-AQ-A1H2-01A	Breast	HR-WT	NA	GRCh38	4	Gain	chr1:214613291-228097878
TCGA-AR-A0TS-01A	Breast	HR-WT	NA	GRCh38	4	Gain	chr1:219173848-229448873
TCGA-AR-A0U0-01A	Breast	HR-WT	NA	GRCh38	4	Gain	chr1:149933385-247491973
TCGA-AR-A0U3-01A	Breast	HR-WT	NA	GRCh38	4	Gain	chr1:214613291-240207785
TCGA-AR-A1AI-01A	Breast	HR-WT	NA	GRCh38	4	Gain	chr1:221335818-248847255
TCGA-AR-A1AK-01A	Breast	HR-WT	NA	GRCh38	4	Gain	chr1:146857802-248855287
TCGA-AR-A1AL-01A	Breast	HR-WT	NA	GRCh38	4	Gain	chr1:143377315-248936635
TCGA-AR-A1AN-01A	Breast	HR-WT	NA	GRCh38	4	Gain	chr1:223541586-248773807
TCGA-AR-A1AQ-01A	Breast	HR-WT	NA	GRCh38	4	Gain	chr1:166747968-234467640
TCGA-AR-A1AS-01A	Breast	HR-WT	NA	GRCh38	4	Gain	chr1:143542956-248917420
TCGA-AR-A24U-01A	Breast	HR-WT	NA	GRCh38	4	Gain	chr1:143568407-248917151
TCGA-AR-A24V-01A	Breast	HR-WT	NA	GRCh38	4	Gain	chr1:145574028-248816707
TCGA-AR-A24X-01A	Breast	HR-WT	NA	GRCh38	4	Gain	chr1:125080222-248855287
TCGA-AR-A2LJ-01A	Breast	HR-WT	NA	GRCh38	4	Gain	chr1:143449351-248442094
TCGA-AR-A2LM-01A	Breast	HR-WT	NA	GRCh38	4	Gain	chr1:144104598-248650751
TCGA-AR-A2LO-01A	Breast	HR-WT	NA	GRCh38	4	Gain	chr1:190614022-248918526
TCGA-AR-A5QM-01A	Breast	HR-WT	NA	GRCh38	4	Gain	chr1:147022950-248772997
TCGA-AR-A5QN-01A	Breast	HR-WT	NA	GRCh38	4	Gain	chr1:214532332-248936765
TCGA-AR-A5QP-01A	Breast	HR-WT	NA	GRCh38	4	Gain	chr1:204618460-248928873
TCGA-B6-A0I1-01A	Breast	HR-WT	NA	GRCh38	4	Gain	chr1:226065736-248936765
TCGA-B6-A0I5-01A	Breast	HR-WT	NA	GRCh38	4	Gain	chr1:201383827-228494048
TCGA-B6-A0RH-01A	Breast	HR-WT	NA	GRCh38	4	Gain	chr1:143545262-248855287
TCGA-B6-A0RN-01A	Breast	HR-WT	NA	GRCh38	4	Gain	chr1:143544087-248816707
TCGA-B6-A0RO-01A	Breast	HR-WT	NA	GRCh38	4	Gain	chr1:157678580-228050605
TCGA-B6-A0WV-01A	Breast	HR-WT	NA	GRCh38	4	Gain	chr1:223480273-227706833
TCGA-B6-A0X0-01A	Breast	HR-WT	NA	GRCh38	4	Gain	chr1:209232407-248918526
TCGA-B6-A1KN-01A	Breast	HR-WT	NA	GRCh38	4	Gain	chr1:201391524-248851580
TCGA-B6-A2IU-01A	Breast	HR-WT	NA	GRCh38	4	Gain	chr1:149933385-248916508
TCGA-B6-A40C-01A	Breast	HR-WT	NA	GRCh38	4	Gain	chr1:144109731-248816707
TCGA-BH-A0AV-01A	Breast	HR-WT	NA	GRCh38	4	Gain	chr1:223625596-227411313
TCGA-BH-A0B5-01A	Breast	HR-WT	NA	GRCh38	4	Gain	chr1:183916257-248638596
TCGA-BH-A0B7-01A	Breast	HR-WT	NA	GRCh38	4	Gain	chr1:202733924-241885643
TCGA-BH-A0BL-01A	Breast	HR-WT	NA	GRCh38	4	Gain	chr1:222942766-227434310
TCGA-BH-A0C0-01A	Breast	HR-WT	NA	GRCh38	4	Gain	chr1:214613291-246885532
TCGA-BH-A0DG-01A	Breast	HR-WT	NA	GRCh38	4	Gain	chr1:146764761-248814441
TCGA-BH-A0DT-01A	Breast	HR-WT	NA	GRCh38	4	Gain	chr1:125183674-248855287
TCGA-BH-A0E1-01A	Breast	HR-WT	NA	GRCh38	4	Gain	chr1:200855849-248650825
TCGA-BH-A0EA-01A	Breast	HR-WT	NA	GRCh38	4	Gain	chr1:143449351-248847255
TCGA-BH-A0H0-01A	Breast	HR-WT	NA	GRCh38	4	Gain	chr1:167055210-248816707
TCGA-BH-A0H3-01A	Breast	HR-WT	NA	GRCh38	4	Gain	chr1:125179173-226894149
TCGA-BH-A0HX-01A	Breast	HR-WT	NA	GRCh38	4	Gain	chr1:214533264-248855287
TCGA-BH-A18Q-01A	Breast	HR-WT	NA	GRCh38	4	Gain	chr1:209837178-238492089
TCGA-BH-A18S-01A	Breast	HR-WT	NA	GRCh38	4	Gain	chr1:143542956-248442094
TCGA-BH-A18V-01A	Breast	HR-WT	NA	GRCh38	4	Gain	chr1:220884303-229325568
TCGA-BH-A1EN-01A	Breast	HR-WT	NA	GRCh38	4	Gain	chr1:201228229-228050605
TCGA-BH-A1EV-01A	Breast	HR-WT	NA	GRCh38	4	Gain	chr1:224955007-248858435
TCGA-BH-A1EX-01A	Breast	HR-WT	NA	GRCh38	4	Gain	chr1:204431930-227265050
TCGA-BH-A1F6-01A	Breast	HR-WT	NA	GRCh38	4	Gain	chr1:175045113-227193741
TCGA-BH-A1F8-01A	Breast	HR-WT	NA	GRCh38	4	Gain	chr1:215411758-236885376
TCGA-BH-A1FL-01A	Breast	HR-WT	NA	GRCh38	4	Gain	chr1:182878246-248847255
TCGA-BH-A204-01A	Breast	HR-WT	NA	GRCh38	4	Gain	chr1:205526263-248816707
TCGA-BH-A28Q-01A	Breast	HR-WT	NA	GRCh38	4	Gain	chr1:145404860-248855287
TCGA-BH-A5J0-01A	Breast	HR-WT	NA	GRCh38	4	Gain	chr1:144435240-248937100
TCGA-C8-A12O-01A	Breast	HR-WT	NA	GRCh38	4	Gain	chr1:155814515-248917420
TCGA-C8-A12P-01A	Breast	HR-WT	NA	GRCh38	4	Gain	chr1:199388114-247965938
TCGA-C8-A12U-01A	Breast	HR-WT	NA	GRCh38	4	Gain	chr1:182385714-227919942
TCGA-C8-A12X-01A	Breast	HR-WT	NA	GRCh38	4	Gain	chr1:225831669-228282169
TCGA-C8-A12Y-01A	Breast	HR-WT	NA	GRCh38	4	Gain	chr1:214532767-248441164
TCGA-C8-A12Z-01A	Breast	HR-WT	NA	GRCh38	4	Gain	chr1:153936592-248917420
TCGA-C8-A130-01A	Breast	HR-WT	NA	GRCh38	4	Gain	chr1:214640267-248407139
TCGA-C8-A132-01A	Breast	HR-WT	NA	GRCh38	4	Gain	chr1:149933385-248441096
TCGA-C8-A1HJ-01A	Breast	HR-WT	NA	GRCh38	4	Gain	chr1:206924077-248917420
TCGA-C8-A1HN-01A	Breast	HR-WT	NA	GRCh38	4	Gain	chr1:214532767-248406068
TCGA-C8-A278-01A	Breast	HR-WT	NA	GRCh38	4	Gain	chr1:171092847-248856131
TCGA-C8-A27A-01A	Breast	HR-WT	NA	GRCh38	4	Gain	chr1:125079830-248772173
TCGA-C8-A27B-01A	Breast	HR-WT	NA	GRCh38	4	Gain	chr1:143570744-229042665
TCGA-C8-A3M7-01A	Breast	HR-WT	NA	GRCh38	4	Gain	chr1:175355514-248917420
TCGA-C8-A3M8-01A	Breast	HR-WT	NA	GRCh38	4	Gain	chr1:215782961-248559476
TCGA-D8-A140-01A	Breast	HR-WT	NA	GRCh38	4	Gain	chr1:218787364-248773519
TCGA-D8-A145-01A	Breast	HR-WT	NA	GRCh38	4	Gain	chr1:161626241-248913816
TCGA-D8-A1JE-01A	Breast	HR-WT	NA	GRCh38	4	Gain	chr1:150082591-248855287
TCGA-D8-A1JT-01A	Breast	HR-WT	NA	GRCh38	4	Gain	chr1:174892349-248752910
TCGA-D8-A1XA-01A	Breast	HR-WT	NA	GRCh38	4	Gain	chr1:143267068-248917420
TCGA-D8-A3Z6-01A	Breast	HR-WT	NA	GRCh38	4	Gain	chr1:143499103-248936569
TCGA-E2-A14P-01A	Breast	HR-WT	NA	GRCh38	4	Gain	chr1:215083544-248453832
TCGA-E2-A14T-01A	Breast	HR-WT	NA	GRCh38	4	Gain	chr1:125180079-248441064
TCGA-E2-A150-01A	Breast	HR-WT	NA	GRCh38	4	Gain	chr1:149554309-248650825
TCGA-E2-A152-01A	Breast	HR-WT	NA	GRCh38	4	Gain	chr1:179378696-248857802
TCGA-E2-A158-01A	Breast	HR-WT	NA	GRCh38	4	Gain	chr1:175045113-236981431
TCGA-E2-A15J-01A	Breast	HR-WT	NA	GRCh38	4	Gain	chr1:149029905-248812149
TCGA-E2-A15K-01A	Breast	HR-WT	NA	GRCh38	4	Gain	chr1:223770569-247974711
TCGA-E2-A1B5-01A	Breast	HR-WT	NA	GRCh38	4	Gain	chr1:146646411-248650825
TCGA-E2-A1IJ-01A	Breast	HR-WT	NA	GRCh38	4	Gain	chr1:143605385-248650825
TCGA-E2-A1IO-01A	Breast	HR-WT	NA	GRCh38	4	Gain	chr1:196951017-248855287
TCGA-E2-A1L7-01A	Breast	HR-WT	NA	GRCh38	4	Gain	chr1:145291812-240437922
TCGA-E2-A1LG-01A	Breast	HR-WT	NA	GRCh38	4	Gain	chr1:214605823-246735821
TCGA-E2-A1LK-01A	Breast	HR-WT	NA	GRCh38	4	Gain	chr1:209605427-227747743
TCGA-E2-A2P6-01A	Breast	HR-WT	NA	GRCh38	4	Gain	chr1:125067376-248936711
TCGA-E2-A56Z-01A	Breast	HR-WT	NA	GRCh38	4	Gain	chr1:190618601-248388335
TCGA-E2-A570-01A	Breast	HR-WT	NA	GRCh38	4	Gain	chr1:143471072-248936864
TCGA-E9-A1N5-01A	Breast	HR-WT	NA	GRCh38	4	Gain	chr1:143263449-248856131
TCGA-E9-A1N8-01A	Breast	HR-WT	NA	GRCh38	4	Gain	chr1:145241779-248816707
TCGA-E9-A1RG-01A	Breast	HR-WT	NA	GRCh38	4	Gain	chr1:143555617-248816707
TCGA-E9-A229-01A	Breast	HR-WT	NA	GRCh38	4	Gain	chr1:214464828-248816707
TCGA-E9-A22B-01A	Breast	HR-WT	NA	GRCh38	4	Gain	chr1:143542956-240177864
TCGA-E9-A24A-01A	Breast	HR-WT	NA	GRCh38	4	Gain	chr1:145401079-248816707
TCGA-EW-A1J1-01A	Breast	HR-WT	NA	GRCh38	4	Gain	chr1:214606003-248650422
TCGA-EW-A1J2-01A	Breast	HR-WT	NA	GRCh38	4	Gain	chr1:144054586-229637694
TCGA-EW-A1P8-01A	Breast	HR-WT	NA	GRCh38	4	Gain	chr1:225368153-227493885
TCGA-EW-A1PB-01A	Breast	HR-WT	NA	GRCh38	4	Gain	chr1:224617409-229705511
TCGA-GM-A2D9-01A	Breast	HR-WT	NA	GRCh38	4	Gain	chr1:125179173-248816707
TCGA-GM-A2DC-01A	Breast	HR-WT	NA	GRCh38	4	Gain	chr1:214641227-227493885
TCGA-GM-A2DF-01A	Breast	HR-WT	NA	GRCh38	4	Gain	chr1:149071525-248916897
TCGA-GM-A2DN-01A	Breast	HR-WT	NA	GRCh38	4	Gain	chr1:145840889-248918274
TCGA-GM-A3NW-01A	Breast	HR-WT	NA	GRCh38	4	Gain	chr1:143497018-248928636
TCGA-GM-A3NY-01A	Breast	HR-WT	NA	GRCh38	4	Gain	chr1:143498891-248855287
TCGA-GM-A3XN-01A	Breast	HR-WT	NA	GRCh38	4	Gain	chr1:147022686-248936765
TCGA-GM-A4E0-01A	Breast	HR-WT	NA	GRCh38	4	Gain	chr1:143310260-248857802
TCGA-GM-A5PX-01A	Breast	HR-WT	NA	GRCh38	4	Gain	chr1:143310034-248936765
TCGA-LL-A5YO-01A	Breast	HR-WT	NA	GRCh38	4	Gain	chr1:149935859-248916897
TCGA-OK-A5Q2-01A	Breast	HR-WT	NA	GRCh38	4	Gain	chr1:220581213-248937246
TCGA-OL-A5RZ-01A	Breast	HR-WT	NA	GRCh38	4	Gain	chr1:150274007-248928736
TCGA-OL-A66I-01A	Breast	HR-WT	NA	GRCh38	4	Gain	chr1:178283761-248937246
TCGA-S3-AA10-01A	Breast	HR-WT	NA	GRCh38	4	Gain	chr1:206637785-227493167
TCGA-04-1336-01A	Ovarian	gBRCA1/2	BRCA2	GRCh38	4	Gain	chr1:214483346-248441151
TCGA-04-1367-01A	Ovarian	gBRCA1/2	BRCA2	GRCh38	4	Gain	chr1:225778100-230325333
TCGA-13-0894-01B	Ovarian	gBRCA1/2	BRCA1	GRCh38	4	Gain	chr1:214483353-248917420
TCGA-13-0903-01A	Ovarian	gBRCA1/2	BRCA1	GRCh38	4	Gain	chr1:150552401-248816707
TCGA-13-1404-01A	Ovarian	gBRCA1/2	BRCA1	GRCh38	4	Gain	chr1:214483353-236230337
TCGA-23-2078-01A	Ovarian	gBRCA1/2	BRCA1	GRCh38	4	Gain	chr1:125088087-248847255
TCGA-23-2081-01A	Ovarian	gBRCA1/2	BRCA1	GRCh38	4	Gain	chr1:125088087-232493729
TCGA-24-0975-01B	Ovarian	gBRCA1/2	BRCA2	GRCh38	4	Gain	chr1:196951047-248814441
TCGA-24-2267-01A	Ovarian	gBRCA1/2	BRCA1	GRCh38	4	Gain	chr1:220884396-248855917
TCGA-25-2401-01A	Ovarian	gBRCA1/2	BRCA1	GRCh38	4	Gain	chr1:143497036-248650825
TCGA-29-1775-01A	Ovarian	gBRCA1/2	BRCA1	GRCh38	4	Gain	chr1:197921671-248855287
TCGA-59-A5PD-01A	Ovarian	gBRCA1/2	BRCA2	GRCh38	4	Gain	chr1:222943129-228352841
TCGA-61-2008-01A	Ovarian	gBRCA1/2	BRCA1	GRCh38	4	Gain	chr1:207738411-241993244
TCGA-61-2104-01A	Ovarian	gBRCA1/2	BRCA1	GRCh38	4	Gain	chr1:215086808-248847255
TCGA-61-2109-01A	Ovarian	gBRCA1/2	BRCA1	GRCh38	4	Gain	chr1:214608627-248488626
TCGA-13-0886-01A	Ovarian	gBRCA1/2	BRCA2	GRCh37	4	Gain	chr1:223980964-230781474
TCGA-04-1342-01A	Ovarian	HR-WT	NA	GRCh38	4	Gain	chr1:125128699-248914072
TCGA-04-1348-01A	Ovarian	HR-WT	NA	GRCh38	4	Gain	chr1:157059764-227493167
TCGA-04-1361-01A	Ovarian	HR-WT	NA	GRCh38	4	Gain	chr1:152216443-248406068
TCGA-09-1673-01A	Ovarian	HR-WT	NA	GRCh38	4	Gain	chr1:214532332-227493082
TCGA-10-0930-01A	Ovarian	HR-WT	NA	GRCh38	4	Gain	chr1:222561285-227493082
TCGA-10-0935-01A	Ovarian	HR-WT	NA	GRCh38	4	Gain	chr1:214613291-248650825
TCGA-13-0723-01A	Ovarian	HR-WT	NA	GRCh38	4	Gain	chr1:214532332-248936765
TCGA-13-0724-01A	Ovarian	HR-WT	NA	GRCh38	4	Gain	chr1:156333735-246634672
TCGA-13-0760-01A	Ovarian	HR-WT	NA	GRCh38	4	Gain	chr1:207466349-233054200
TCGA-13-0791-01A	Ovarian	HR-WT	NA	GRCh38	4	Gain	chr1:217648792-248936569
TCGA-13-0884-01B	Ovarian	HR-WT	NA	GRCh38	4	Gain	chr1:214483353-227411313
TCGA-13-0912-01A	Ovarian	HR-WT	NA	GRCh38	4	Gain	chr1:214644512-248936569
TCGA-13-1403-01A	Ovarian	HR-WT	NA	GRCh38	4	Gain	chr1:219532984-233379667
TCGA-13-1405-01A	Ovarian	HR-WT	NA	GRCh38	4	Gain	chr1:214613291-248816968
TCGA-13-1484-01A	Ovarian	HR-WT	NA	GRCh38	4	Gain	chr1:149959621-248638227
TCGA-13-1501-01A	Ovarian	HR-WT	NA	GRCh38	4	Gain	chr1:179341476-248850530
TCGA-13-1506-01A	Ovarian	HR-WT	NA	GRCh38	4	Gain	chr1:215086808-229097029
TCGA-13-1509-01A	Ovarian	HR-WT	NA	GRCh38	4	Gain	chr1:201075619-248473745
TCGA-13-1510-01A	Ovarian	HR-WT	NA	GRCh38	4	Gain	chr1:223792504-230337357
TCGA-13-2060-01A	Ovarian	HR-WT	NA	GRCh38	4	Gain	chr1:156041652-248847255
TCGA-20-1684-01A	Ovarian	HR-WT	NA	GRCh38	4	Gain	chr1:214532332-227492899
TCGA-23-1111-01A	Ovarian	HR-WT	NA	GRCh38	4	Gain	chr1:161230795-248936569
TCGA-23-1117-01A	Ovarian	HR-WT	NA	GRCh38	4	Gain	chr1:220126692-248936765
TCGA-23-1123-01A	Ovarian	HR-WT	NA	GRCh38	4	Gain	chr1:216418660-228316771
TCGA-23-1809-01A	Ovarian	HR-WT	NA	GRCh38	4	Gain	chr1:205579930-248936715
TCGA-24-1416-01A	Ovarian	HR-WT	NA	GRCh38	4	Gain	chr1:161673769-227493774
TCGA-24-1419-01A	Ovarian	HR-WT	NA	GRCh38	4	Gain	chr1:192247687-248816707
TCGA-24-1424-01A	Ovarian	HR-WT	NA	GRCh38	4	Gain	chr1:205598861-248855287
TCGA-24-1431-01A	Ovarian	HR-WT	NA	GRCh38	4	Gain	chr1:143496886-248650751
TCGA-24-1466-01A	Ovarian	HR-WT	NA	GRCh38	4	Gain	chr1:225419441-230325333
TCGA-24-1467-01A	Ovarian	HR-WT	NA	GRCh38	4	Gain	chr1:125128699-248775007
TCGA-24-1474-01A	Ovarian	HR-WT	NA	GRCh38	4	Gain	chr1:224030726-227492904
TCGA-24-1550-01A	Ovarian	HR-WT	NA	GRCh38	4	Gain	chr1:143542956-248100169
TCGA-24-1563-01A	Ovarian	HR-WT	NA	GRCh38	4	Gain	chr1:214532174-248039042
TCGA-24-1842-01A	Ovarian	HR-WT	NA	GRCh38	4	Gain	chr1:210920247-248855287
TCGA-24-1844-01A	Ovarian	HR-WT	NA	GRCh38	4	Gain	chr1:214605987-245858769
TCGA-24-2036-01A	Ovarian	HR-WT	NA	GRCh38	4	Gain	chr1:212796678-248650751
TCGA-24-2281-01A	Ovarian	HR-WT	NA	GRCh38	4	Gain	chr1:205083646-248847255
TCGA-25-1319-01A	Ovarian	HR-WT	NA	GRCh38	4	Gain	chr1:125088087-248442094
TCGA-25-1329-01A	Ovarian	HR-WT	NA	GRCh38	4	Gain	chr1:215580011-248773095
TCGA-25-2398-01A	Ovarian	HR-WT	NA	GRCh38	4	Gain	chr1:153717536-233289042
TCGA-25-2400-01A	Ovarian	HR-WT	NA	GRCh38	4	Gain	chr1:214606003-227052045
TCGA-29-1697-01A	Ovarian	HR-WT	NA	GRCh38	4	Gain	chr1:214532332-248936569
TCGA-29-1701-01A	Ovarian	HR-WT	NA	GRCh38	4	Gain	chr1:205598861-248855287
TCGA-29-1763-01A	Ovarian	HR-WT	NA	GRCh38	4	Gain	chr1:220884084-230839708
TCGA-31-1953-01A	Ovarian	HR-WT	NA	GRCh38	4	Gain	chr1:214330141-248816707
TCGA-59-2352-01A	Ovarian	HR-WT	NA	GRCh38	4	Gain	chr1:125088087-248936594
TCGA-59-2363-01A	Ovarian	HR-WT	NA	GRCh38	4	Gain	chr1:203205792-239052627
TCGA-61-1913-01A	Ovarian	HR-WT	NA	GRCh38	4	Gain	chr1:149812607-248651185
TCGA-61-1995-01A	Ovarian	HR-WT	NA	GRCh38	4	Gain	chr1:125088087-248816707
TCGA-61-1998-01A	Ovarian	HR-WT	NA	GRCh38	4	Gain	chr1:152579808-248917151
TCGA-61-2000-01A	Ovarian	HR-WT	NA	GRCh38	4	Gain	chr1:161230014-248650825
TCGA-61-2016-01A	Ovarian	HR-WT	NA	GRCh38	4	Gain	chr1:201077933-248650825
TCGA-61-2088-01A	Ovarian	HR-WT	NA	GRCh38	4	Gain	chr1:214870827-248816707
TCGA-61-2110-01A	Ovarian	HR-WT	NA	GRCh38	4	Gain	chr1:125088087-248681363
TCGA-13-0795-01A	Ovarian	HR-WT	NA	GRCh38	4	Gain	chr1:224952818-226378904; chr1:226379024-229547517
TCGA-A7-A4SE-01A	Breast	gBRCA1/2	BRCA1	GRCh38	5	Gain	chr1:185306314-248936926
TCGA-A8-A09A-01A	Breast	gBRCA1/2	BRCA2	GRCh38	5	Gain	chr1:214605687-229286446
TCGA-AN-A0FX-01A	Breast	gBRCA1/2	BRCA1	GRCh38	5	Gain	chr1:152018663-248816707
TCGA-AO-A124-01A	Breast	gBRCA1/2	BRCA1	GRCh38	5	Gain	chr1:220618386-226888238
TCGA-AR-A1AM-01A	Breast	gBRCA1/2	BRCA1	GRCh38	5	Gain	chr1:182959887-228493379
TCGA-AR-A24Q-01A	Breast	gBRCA1/2	BRCA1	GRCh38	5	Gain	chr1:214464828-248917151
TCGA-E2-A14Z-01A	Breast	gBRCA1/2	BRCA1	GRCh38	5	Gain	chr1:214608404-248918526
TCGA-E9-A1NE-01A	Breast	gBRCA1/2	BRCA2	GRCh38	5	Gain	chr1:222564138-248918526
TCGA-E9-A244-01A	Breast	gBRCA1/2	BRCA1	GRCh38	5	Gain	chr1:219968727-244610212
TCGA-E9-A3QA-01A	Breast	gBRCA1/2	BRCA1	GRCh38	5	Gain	chr1:152218196-248650448
TCGA-A1-A0SE-01A	Breast	HR-WT	NA	GRCh38	5	Gain	chr1:214305115-228362728
TCGA-A1-A0SF-01A	Breast	HR-WT	NA	GRCh38	5	Gain	chr1:145291636-248650825
TCGA-A1-A0SJ-01A	Breast	HR-WT	NA	GRCh38	5	Gain	chr1:224617409-248858508
TCGA-A1-A0SN-01A	Breast	HR-WT	NA	GRCh38	5	Gain	chr1:156212918-248856376
TCGA-A2-A04X-01A	Breast	HR-WT	NA	GRCh38	5	Gain	chr1:220800546-226753889
TCGA-A2-A0CS-01A	Breast	HR-WT	NA	GRCh38	5	Gain	chr1:149658030-248816707
TCGA-A2-A0CV-01A	Breast	HR-WT	NA	GRCh38	5	Gain	chr1:148122437-247974711
TCGA-A2-A0CW-01A	Breast	HR-WT	NA	GRCh38	5	Gain	chr1:162517939-248812866
TCGA-A2-A0D3-01A	Breast	HR-WT	NA	GRCh38	5	Gain	chr1:201211140-248349465
TCGA-A2-A0D4-01A	Breast	HR-WT	NA	GRCh38	5	Gain	chr1:214483427-248855287
TCGA-A2-A0EO-01A	Breast	HR-WT	NA	GRCh38	5	Gain	chr1:151366093-227493866
TCGA-A2-A0EV-01A	Breast	HR-WT	NA	GRCh38	5	Gain	chr1:206924231-248816707
TCGA-A2-A0EY-01A	Breast	HR-WT	NA	GRCh38	5	Gain	chr1:214613291-227434310
TCGA-A2-A0T5-01A	Breast	HR-WT	NA	GRCh38	5	Gain	chr1:125180489-234467640
TCGA-A7-A0CD-01A	Breast	HR-WT	NA	GRCh38	5	Gain	chr1:125179342-248404228
TCGA-A7-A26I-01A	Breast	HR-WT	NA	GRCh38	5	Gain	chr1:225305142-248855287
TCGA-A7-A425-01A	Breast	HR-WT	NA	GRCh38	5	Gain	chr1:143499103-248936463
TCGA-A8-A06Q-01A	Breast	HR-WT	NA	GRCh38	5	Gain	chr1:214613786-248812149
TCGA-A8-A06U-01A	Breast	HR-WT	NA	GRCh38	5	Gain	chr1:149677384-248773807
TCGA-A8-A07B-01A	Breast	HR-WT	NA	GRCh38	5	Gain	chr1:214613291-227434310
TCGA-A8-A08C-01A	Breast	HR-WT	NA	GRCh38	5	Gain	chr1:145096984-247949613
TCGA-A8-A095-01A	Breast	HR-WT	NA	GRCh38	5	Gain	chr1:224952984-248847255
TCGA-A8-A09C-01A	Breast	HR-WT	NA	GRCh38	5	Gain	chr1:149909097-248914214
TCGA-AC-A23E-01A	Breast	HR-WT	NA	GRCh38	5	Gain	chr1:146574277-248816707
TCGA-AC-A2B8-01A	Breast	HR-WT	NA	GRCh38	5	Gain	chr1:176692092-248816707
TCGA-AC-A2BM-01A	Breast	HR-WT	NA	GRCh38	5	Gain	chr1:147020466-248936765
TCGA-AC-A2QH-01A	Breast	HR-WT	NA	GRCh38	5	Gain	chr1:144426380-248854200
TCGA-AC-A62Y-01A	Breast	HR-WT	NA	GRCh38	5	Gain	chr1:143505479-248811727
TCGA-AN-A04C-01A	Breast	HR-WT	NA	GRCh38	5	Gain	chr1:161984594-248855174
TCGA-AN-A0FS-01A	Breast	HR-WT	NA	GRCh38	5	Gain	chr1:192246911-248855287
TCGA-AO-A03P-01A	Breast	HR-WT	NA	GRCh38	5	Gain	chr1:214532332-227430849
TCGA-AO-A0J9-01A	Breast	HR-WT	NA	GRCh38	5	Gain	chr1:214533264-228349074
TCGA-AO-A12A-01A	Breast	HR-WT	NA	GRCh38	5	Gain	chr1:143600191-248847255
TCGA-AO-A1KT-01A	Breast	HR-WT	NA	GRCh38	5	Gain	chr1:143267068-248816707
TCGA-AQ-A04H-01B	Breast	HR-WT	NA	GRCh38	5	Gain	chr1:217631424-247921678
TCGA-AQ-A54N-01A	Breast	HR-WT	NA	GRCh38	5	Gain	chr1:222519861-230684832
TCGA-AR-A1AH-01A	Breast	HR-WT	NA	GRCh38	5	Gain	chr1:157415980-233259468
TCGA-AR-A24Z-01A	Breast	HR-WT	NA	GRCh38	5	Gain	chr1:217742250-227160425
TCGA-AR-A256-01A	Breast	HR-WT	NA	GRCh38	5	Gain	chr1:209430650-248858435
TCGA-AR-A2LK-01A	Breast	HR-WT	NA	GRCh38	5	Gain	chr1:206116918-248847255
TCGA-B6-A0I2-01A	Breast	HR-WT	NA	GRCh38	5	Gain	chr1:200913787-247990311
TCGA-BH-A0AU-01A	Breast	HR-WT	NA	GRCh38	5	Gain	chr1:204952129-228444018
TCGA-BH-A0AY-01A	Breast	HR-WT	NA	GRCh38	5	Gain	chr1:214532332-248651185
TCGA-BH-A0BT-01A	Breast	HR-WT	NA	GRCh38	5	Gain	chr1:215083544-227265050
TCGA-BH-A0DS-01A	Breast	HR-WT	NA	GRCh38	5	Gain	chr1:167848171-248936765
TCGA-BH-A0DV-01A	Breast	HR-WT	NA	GRCh38	5	Gain	chr1:147113563-248650825
TCGA-BH-A0GY-01A	Breast	HR-WT	NA	GRCh38	5	Gain	chr1:214483353-248854108
TCGA-BH-A0H7-01A	Breast	HR-WT	NA	GRCh38	5	Gain	chr1:155598780-248650825
TCGA-BH-A0HK-01A	Breast	HR-WT	NA	GRCh38	5	Gain	chr1:214613291-227317387
TCGA-BH-A0HY-01A	Breast	HR-WT	NA	GRCh38	5	Gain	chr1:184567036-248816707
TCGA-BH-A0RX-01A	Breast	HR-WT	NA	GRCh38	5	Gain	chr1:196998327-248388335
TCGA-BH-A0W3-01A	Breast	HR-WT	NA	GRCh38	5	Gain	chr1:211173582-247423034
TCGA-BH-A18H-01A	Breast	HR-WT	NA	GRCh38	5	Gain	chr1:175083964-248857397
TCGA-BH-A18J-01A	Breast	HR-WT	NA	GRCh38	5	Gain	chr1:225777824-228743088
TCGA-BH-A1EO-01A	Breast	HR-WT	NA	GRCh38	5	Gain	chr1:143449351-248681363
TCGA-BH-A1FJ-01A	Breast	HR-WT	NA	GRCh38	5	Gain	chr1:201218777-227740789
TCGA-C8-A12W-01A	Breast	HR-WT	NA	GRCh38	5	Gain	chr1:153615731-248858423
TCGA-C8-A135-01A	Breast	HR-WT	NA	GRCh38	5	Gain	chr1:205009514-228830432
TCGA-C8-A138-01A	Breast	HR-WT	NA	GRCh38	5	Gain	chr1:153310702-247606450
TCGA-C8-A1HK-01A	Breast	HR-WT	NA	GRCh38	5	Gain	chr1:143544363-248917420
TCGA-C8-A26Z-01A	Breast	HR-WT	NA	GRCh38	5	Gain	chr1:143267383-248856131
TCGA-D8-A13Z-01A	Breast	HR-WT	NA	GRCh38	5	Gain	chr1:201283737-248387675
TCGA-D8-A1XF-01A	Breast	HR-WT	NA	GRCh38	5	Gain	chr1:145518601-248816707
TCGA-D8-A1XG-01A	Breast	HR-WT	NA	GRCh38	5	Gain	chr1:143228509-248855287
TCGA-D8-A3Z5-01A	Breast	HR-WT	NA	GRCh38	5	Gain	chr1:147019497-248816707
TCGA-E2-A14O-01A	Breast	HR-WT	NA	GRCh38	5	Gain	chr1:144437998-248473814
TCGA-E2-A14V-01A	Breast	HR-WT	NA	GRCh38	5	Gain	chr1:150806330-227626208
TCGA-E2-A15D-01A	Breast	HR-WT	NA	GRCh38	5	Gain	chr1:125179342-248853793
TCGA-E2-A1L8-01A	Breast	HR-WT	NA	GRCh38	5	Gain	chr1:143503369-248916897
TCGA-E2-A1LH-01A	Breast	HR-WT	NA	GRCh38	5	Gain	chr1:214482726-248650825
TCGA-E2-A2P5-01A	Breast	HR-WT	NA	GRCh38	5	Gain	chr1:157596420-248928496
TCGA-E9-A1R5-01A	Breast	HR-WT	NA	GRCh38	5	Gain	chr1:144423393-248914144
TCGA-E9-A247-01A	Breast	HR-WT	NA	GRCh38	5	Gain	chr1:125079715-248918526
TCGA-EW-A1J3-01A	Breast	HR-WT	NA	GRCh38	5	Gain	chr1:177677884-248407139
TCGA-EW-A1J5-01A	Breast	HR-WT	NA	GRCh38	5	Gain	chr1:168087485-227493082
TCGA-EW-A1OZ-01A	Breast	HR-WT	NA	GRCh38	5	Gain	chr1:209608862-241889740
TCGA-EW-A1P5-01A	Breast	HR-WT	NA	GRCh38	5	Gain	chr1:170542462-248816707
TCGA-EW-A1PH-01A	Breast	HR-WT	NA	GRCh38	5	Gain	chr1:224175667-248816707
TCGA-GI-A2C8-01A	Breast	HR-WT	NA	GRCh38	5	Gain	chr1:224030726-248816707
TCGA-JL-A3YX-01A	Breast	HR-WT	NA	GRCh38	5	Gain	chr1:216418660-248936765
TCGA-LL-A5YL-01A	Breast	HR-WT	NA	GRCh38	5	Gain	chr1:215086142-248928636
TCGA-LL-A5YP-01A	Breast	HR-WT	NA	GRCh38	5	Gain	chr1:223542005-248937080
TCGA-OL-A5S0-01A	Breast	HR-WT	NA	GRCh38	5	Gain	chr1:152309182-227434310
TCGA-13-1488-01A	Ovarian	gBRCA1/2	BRCA1	GRCh38	5	Gain	chr1:225406618-227160772
TCGA-23-2084-01A	Ovarian	gBRCA1/2	BRCA2	GRCh38	5	Gain	chr1:156844234-248650751
TCGA-24-2288-01A	Ovarian	gBRCA1/2	BRCA2	GRCh38	5	Gain	chr1:168304962-227493134
TCGA-29-1764-01A	Ovarian	gBRCA1/2	BRCA2	GRCh38	5	Gain	chr1:152356892-248825109
TCGA-29-1781-01A	Ovarian	gBRCA1/2	BRCA1	GRCh38	5	Gain	chr1:220323592-227456622
TCGA-09-2049-01D	Ovarian	HR-WT	NA	GRCh38	5	Gain	chr1:214613291-232493729
TCGA-09-2053-01C	Ovarian	HR-WT	NA	GRCh38	5	Gain	chr1:125088087-230236137
TCGA-10-0933-01A	Ovarian	HR-WT	NA	GRCh38	5	Gain	chr1:168231494-248847255
TCGA-13-0800-01A	Ovarian	HR-WT	NA	GRCh38	5	Gain	chr1:151025365-248061267
TCGA-13-0911-01A	Ovarian	HR-WT	NA	GRCh38	5	Gain	chr1:225921876-226781757
TCGA-13-0920-01A	Ovarian	HR-WT	NA	GRCh38	5	Gain	chr1:222673539-234607491
TCGA-13-1483-01A	Ovarian	HR-WT	NA	GRCh38	5	Gain	chr1:214613093-233261946
TCGA-13-1504-01A	Ovarian	HR-WT	NA	GRCh38	5	Gain	chr1:125088174-248682198
TCGA-20-1683-01A	Ovarian	HR-WT	NA	GRCh38	5	Gain	chr1:214544871-247444340
TCGA-23-1031-01A	Ovarian	HR-WT	NA	GRCh38	5	Gain	chr1:173983400-230693241
TCGA-24-1471-01A	Ovarian	HR-WT	NA	GRCh38	5	Gain	chr1:201874677-248855548
TCGA-24-1549-01A	Ovarian	HR-WT	NA	GRCh38	5	Gain	chr1:224190529-248650825
TCGA-24-1562-01A	Ovarian	HR-WT	NA	GRCh38	5	Gain	chr1:214612847-248650825
TCGA-24-1616-01A	Ovarian	HR-WT	NA	GRCh38	5	Gain	chr1:218302190-248936635
TCGA-24-2271-01A	Ovarian	HR-WT	NA	GRCh38	5	Gain	chr1:152358763-248916897
TCGA-24-2290-01A	Ovarian	HR-WT	NA	GRCh38	5	Gain	chr1:219988516-248816707
TCGA-25-1315-01A	Ovarian	HR-WT	NA	GRCh38	5	Gain	chr1:225831931-239052627
TCGA-25-2042-01A	Ovarian	HR-WT	NA	GRCh38	5	Gain	chr1:143553028-248650825
TCGA-29-1698-01A	Ovarian	HR-WT	NA	GRCh38	5	Gain	chr1:212961622-227411065
TCGA-29-1702-01A	Ovarian	HR-WT	NA	GRCh38	5	Gain	chr1:200120743-248650825
TCGA-29-1710-01A	Ovarian	HR-WT	NA	GRCh38	5	Gain	chr1:125118086-248816707
TCGA-29-1761-01A	Ovarian	HR-WT	NA	GRCh38	5	Gain	chr1:205061987-248936569
TCGA-29-1778-01A	Ovarian	HR-WT	NA	GRCh38	5	Gain	chr1:205619508-239973036
TCGA-61-2101-01A	Ovarian	HR-WT	NA	GRCh38	5	Gain	chr1:214390996-238491580
TCGA-61-2113-01A	Ovarian	HR-WT	NA	GRCh38	5	Gain	chr1:125088087-248847255
TCGA-A2-A0D2-01A	Breast	gBRCA1/2	BRCA1	GRCh38	6	Amplification	chr1:225773681-248650825
TCGA-A8-A097-01A	Breast	gBRCA1/2	BRCA2	GRCh38	6	Amplification	chr1:214613291-227264658
TCGA-BH-A1FN-01A	Breast	gBRCA1/2	BRCA2	GRCh38	6	Amplification	chr1:220467786-230325333
TCGA-D8-A1JD-01A	Breast	gBRCA1/2	BRCA2	GRCh38	6	Amplification	chr1:214605803-248914144
TCGA-E9-A22G-01A	Breast	gBRCA1/2	BRCA1	GRCh38	6	Amplification	chr1:217610467-233161162
TCGA-A1-A0SP-01A	Breast	HR-WT	NA	GRCh38	6	Amplification	chr1:144892532-236250062
TCGA-A2-A04Q-01A	Breast	HR-WT	NA	GRCh38	6	Amplification	chr1:214483122-242100800
TCGA-A2-A0T3-01A	Breast	HR-WT	NA	GRCh38	6	Amplification	chr1:146885552-248650825
TCGA-A2-A0YD-01A	Breast	HR-WT	NA	GRCh38	6	Amplification	chr1:214483182-226427107
TCGA-A2-A0YJ-01A	Breast	HR-WT	NA	GRCh38	6	Amplification	chr1:158034629-248099342
TCGA-A2-A0YT-01A	Breast	HR-WT	NA	GRCh38	6	Amplification	chr1:147111846-248651074
TCGA-A2-A1G1-01A	Breast	HR-WT	NA	GRCh38	6	Amplification	chr1:168183851-228115347
TCGA-A2-A3XS-01A	Breast	HR-WT	NA	GRCh38	6	Amplification	chr1:160681122-248928736
TCGA-A2-A3XZ-01A	Breast	HR-WT	NA	GRCh38	6	Amplification	chr1:125064559-248916897
TCGA-A7-A26F-01A	Breast	HR-WT	NA	GRCh38	6	Amplification	chr1:149933385-248442094
TCGA-A8-A075-01A	Breast	HR-WT	NA	GRCh38	6	Amplification	chr1:214613786-248771626
TCGA-A8-A076-01A	Breast	HR-WT	NA	GRCh38	6	Amplification	chr1:149900351-235172955
TCGA-A8-A07F-01A	Breast	HR-WT	NA	GRCh38	6	Amplification	chr1:214532332-248441241
TCGA-A8-A07Z-01A	Breast	HR-WT	NA	GRCh38	6	Amplification	chr1:214483427-227411065
TCGA-A8-A08F-01A	Breast	HR-WT	NA	GRCh38	6	Amplification	chr1:220796685-230801865
TCGA-A8-A08G-01A	Breast	HR-WT	NA	GRCh38	6	Amplification	chr1:200213604-248914144
TCGA-A8-A08S-01A	Breast	HR-WT	NA	GRCh38	6	Amplification	chr1:214613786-248452742
TCGA-A8-A09E-01A	Breast	HR-WT	NA	GRCh38	6	Amplification	chr1:205351688-248936863
TCGA-AC-A3OD-01B	Breast	HR-WT	NA	GRCh38	6	Amplification	chr1:209830986-248937128
TCGA-AC-A3TM-01A	Breast	HR-WT	NA	GRCh38	6	Amplification	chr1:150226790-248936765
TCGA-AC-A3W5-01A	Breast	HR-WT	NA	GRCh38	6	Amplification	chr1:197347304-247876149
TCGA-AC-A3YJ-01A	Breast	HR-WT	NA	GRCh38	6	Amplification	chr1:151369226-248936569
TCGA-AC-A5EH-01A	Breast	HR-WT	NA	GRCh38	6	Amplification	chr1:143498871-248856006
TCGA-AC-A62X-01A	Breast	HR-WT	NA	GRCh38	6	Amplification	chr1:214483353-248442226
TCGA-AN-A0XN-01A	Breast	HR-WT	NA	GRCh38	6	Amplification	chr1:212614863-228374649
TCGA-AO-A0JD-01A	Breast	HR-WT	NA	GRCh38	6	Amplification	chr1:179366816-248936569
TCGA-AO-A1KR-01A	Breast	HR-WT	NA	GRCh38	6	Amplification	chr1:143542956-248917151
TCGA-AO-A1KS-01A	Breast	HR-WT	NA	GRCh38	6	Amplification	chr1:201448963-235053655
TCGA-AR-A1AJ-01A	Breast	HR-WT	NA	GRCh38	6	Amplification	chr1:147022950-248349335
TCGA-AR-A1AR-01A	Breast	HR-WT	NA	GRCh38	6	Amplification	chr1:222621112-239973526
TCGA-AR-A1AW-01A	Breast	HR-WT	NA	GRCh38	6	Amplification	chr1:148972320-248918526
TCGA-B6-A0I9-01A	Breast	HR-WT	NA	GRCh38	6	Amplification	chr1:210481872-231366564
TCGA-B6-A0IB-01A	Breast	HR-WT	NA	GRCh38	6	Amplification	chr1:211103485-228274056
TCGA-B6-A0RE-01A	Breast	HR-WT	NA	GRCh38	6	Amplification	chr1:209525765-248083484
TCGA-B6-A1KC-01B	Breast	HR-WT	NA	GRCh38	6	Amplification	chr1:177960492-248855259
TCGA-B6-A408-01A	Breast	HR-WT	NA	GRCh38	6	Amplification	chr1:143499103-248928736
TCGA-BH-A0AW-01A	Breast	HR-WT	NA	GRCh38	6	Amplification	chr1:214483324-248816707
TCGA-BH-A0BA-01A	Breast	HR-WT	NA	GRCh38	6	Amplification	chr1:156969274-248703037
TCGA-BH-A0BD-01A	Breast	HR-WT	NA	GRCh38	6	Amplification	chr1:176164020-248855287
TCGA-BH-A0BJ-01A	Breast	HR-WT	NA	GRCh38	6	Amplification	chr1:214483346-248816707
TCGA-BH-A0C7-01B	Breast	HR-WT	NA	GRCh38	6	Amplification	chr1:125179127-227493614
TCGA-BH-A0DD-01A	Breast	HR-WT	NA	GRCh38	6	Amplification	chr1:225906943-236163895
TCGA-BH-A0DL-01A	Breast	HR-WT	NA	GRCh38	6	Amplification	chr1:143600191-248847531
TCGA-BH-A0DO-01B	Breast	HR-WT	NA	GRCh38	6	Amplification	chr1:205724007-229042665
TCGA-BH-A0EE-01A	Breast	HR-WT	NA	GRCh38	6	Amplification	chr1:156969274-248772512
TCGA-BH-A0HQ-01A	Breast	HR-WT	NA	GRCh38	6	Amplification	chr1:201225990-235979270
TCGA-BH-A0HU-01A	Breast	HR-WT	NA	GRCh38	6	Amplification	chr1:214327508-228101195
TCGA-BH-A18I-01A	Breast	HR-WT	NA	GRCh38	6	Amplification	chr1:214613291-248273623
TCGA-BH-A18T-01A	Breast	HR-WT	NA	GRCh38	6	Amplification	chr1:157544300-248857824
TCGA-BH-A1ES-01A	Breast	HR-WT	NA	GRCh38	6	Amplification	chr1:158765490-247921523
TCGA-BH-A1EW-01A	Breast	HR-WT	NA	GRCh38	6	Amplification	chr1:143253208-248650825
TCGA-BH-A1F5-01A	Breast	HR-WT	NA	GRCh38	6	Amplification	chr1:214483353-248812866
TCGA-D8-A1J9-01A	Breast	HR-WT	NA	GRCh38	6	Amplification	chr1:143240179-248917420
TCGA-D8-A1JJ-01A	Breast	HR-WT	NA	GRCh38	6	Amplification	chr1:149476209-248816707
TCGA-E2-A14X-01A	Breast	HR-WT	NA	GRCh38	6	Amplification	chr1:192247099-248918527
TCGA-E2-A15H-01A	Breast	HR-WT	NA	GRCh38	6	Amplification	chr1:146140103-248650825
TCGA-E2-A1IF-01A	Breast	HR-WT	NA	GRCh38	6	Amplification	chr1:125079794-248650600
TCGA-E2-A1II-01A	Breast	HR-WT	NA	GRCh38	6	Amplification	chr1:143265755-227411065
TCGA-E2-A1L9-01A	Breast	HR-WT	NA	GRCh38	6	Amplification	chr1:125079705-227732746
TCGA-E2-A574-01A	Breast	HR-WT	NA	GRCh38	6	Amplification	chr1:149791583-248928736
TCGA-E9-A1N9-01A	Breast	HR-WT	NA	GRCh38	6	Amplification	chr1:145518601-248917151
TCGA-E9-A1NF-01A	Breast	HR-WT	NA	GRCh38	6	Amplification	chr1:225289788-227493774
TCGA-E9-A1RB-01A	Breast	HR-WT	NA	GRCh38	6	Amplification	chr1:168104906-227434310
TCGA-E9-A243-01A	Breast	HR-WT	NA	GRCh38	6	Amplification	chr1:153149694-248650751
TCGA-EW-A1PC-01B	Breast	HR-WT	NA	GRCh38	6	Amplification	chr1:149664976-248919738
TCGA-LL-A5YM-01A	Breast	HR-WT	NA	GRCh38	6	Amplification	chr1:204944142-248937100
TCGA-MS-A51U-01A	Breast	HR-WT	NA	GRCh38	6	Amplification	chr1:144437725-248936765
TCGA-OL-A5D7-01A	Breast	HR-WT	NA	GRCh38	6	Amplification	chr1:205016765-248406068
TCGA-PE-A5DE-01A	Breast	HR-WT	NA	GRCh38	6	Amplification	chr1:143771789-248858201
TCGA-13-0887-01A	Ovarian	gBRCA1/2	BRCA1	GRCh38	6	Amplification	chr1:219986919-227493167
TCGA-23-1021-01B	Ovarian	gBRCA1/2	BRCA2	GRCh38	6	Amplification	chr1:225831931-234471358
TCGA-23-1122-01A	Ovarian	gBRCA1/2	BRCA1	GRCh38	6	Amplification	chr1:125128699-229432890
TCGA-24-2293-01A	Ovarian	gBRCA1/2	BRCA2	GRCh38	6	Amplification	chr1:203483097-248816707
TCGA-25-1314-01A	Ovarian	gBRCA1/2	BRCA2	GRCh38	6	Amplification	chr1:222203435-240493497
TCGA-42-2589-01A	Ovarian	gBRCA1/2	BRCA1	GRCh38	6	Amplification	chr1:208217908-233379667
TCGA-57-1993-01A	Ovarian	gBRCA1/2	BRCA1	GRCh38	6	Amplification	chr1:157515770-248936569
TCGA-04-1346-01A	Ovarian	HR-WT	NA	GRCh38	6	Amplification	chr1:222943580-248936638
TCGA-04-1347-01A	Ovarian	HR-WT	NA	GRCh38	6	Amplification	chr1:224574464-226439373
TCGA-04-1542-01A	Ovarian	HR-WT	NA	GRCh38	6	Amplification	chr1:202596819-244610482
TCGA-13-0889-01A	Ovarian	HR-WT	NA	GRCh38	6	Amplification	chr1:143542956-247444340
TCGA-13-0919-01A	Ovarian	HR-WT	NA	GRCh38	6	Amplification	chr1:157589331-247435768
TCGA-13-1409-01A	Ovarian	HR-WT	NA	GRCh38	6	Amplification	chr1:200989000-228280757
TCGA-13-1410-01A	Ovarian	HR-WT	NA	GRCh38	6	Amplification	chr1:153170804-236322349
TCGA-13-1505-01A	Ovarian	HR-WT	NA	GRCh38	6	Amplification	chr1:155056045-248100324
TCGA-23-2072-01A	Ovarian	HR-WT	NA	GRCh38	6	Amplification	chr1:156955642-230921501
TCGA-24-1418-01A	Ovarian	HR-WT	NA	GRCh38	6	Amplification	chr1:220761738-248816707
TCGA-24-1422-01A	Ovarian	HR-WT	NA	GRCh38	6	Amplification	chr1:156955642-236540548
TCGA-24-1426-01A	Ovarian	HR-WT	NA	GRCh38	6	Amplification	chr1:156384574-230096494
TCGA-24-1436-01A	Ovarian	HR-WT	NA	GRCh38	6	Amplification	chr1:200908657-248855287
TCGA-24-1603-01A	Ovarian	HR-WT	NA	GRCh38	6	Amplification	chr1:183587259-248855917
TCGA-24-2261-01A	Ovarian	HR-WT	NA	GRCh38	6	Amplification	chr1:125088087-240207402
TCGA-25-1316-01A	Ovarian	HR-WT	NA	GRCh38	6	Amplification	chr1:161707113-247424175
TCGA-25-1321-01A	Ovarian	HR-WT	NA	GRCh38	6	Amplification	chr1:152223102-231202218
TCGA-29-1695-01A	Ovarian	HR-WT	NA	GRCh38	6	Amplification	chr1:207089634-248441464
TCGA-29-1699-01A	Ovarian	HR-WT	NA	GRCh38	6	Amplification	chr1:175044799-248916508
TCGA-30-1855-01A	Ovarian	HR-WT	NA	GRCh38	6	Amplification	chr1:206116695-228414959
TCGA-61-1728-01A	Ovarian	HR-WT	NA	GRCh38	6	Amplification	chr1:143550945-248936569
TCGA-61-1734-01B	Ovarian	HR-WT	NA	GRCh38	6	Amplification	chr1:125088087-236981431
TCGA-61-1737-01A	Ovarian	HR-WT	NA	GRCh38	6	Amplification	chr1:222202680-236583143
TCGA-61-1738-01A	Ovarian	HR-WT	NA	GRCh38	6	Amplification	chr1:221702879-248916897
TCGA-61-2094-01A	Ovarian	HR-WT	NA	GRCh38	6	Amplification	chr1:125088087-248145378
TCGA-61-2102-01A	Ovarian	HR-WT	NA	GRCh38	6	Amplification	chr1:225403491-248816707
TCGA-B6-A0RG-01A	Breast	gBRCA1/2	BRCA2	GRCh38	7	Amplification	chr1:214532332-228268446
TCGA-A2-A0CM-01A	Breast	HR-WT	NA	GRCh38	7	Amplification	chr1:163068822-228425137
TCGA-A2-A0SX-01A	Breast	HR-WT	NA	GRCh38	7	Amplification	chr1:226318351-228022478
TCGA-A2-A0YE-01A	Breast	HR-WT	NA	GRCh38	7	Amplification	chr1:215083544-248773210
TCGA-A2-A3XX-01A	Breast	HR-WT	NA	GRCh38	7	Amplification	chr1:143449351-248937246
TCGA-A8-A06O-01A	Breast	HR-WT	NA	GRCh38	7	Amplification	chr1:201384541-248650825
TCGA-A8-A07G-01A	Breast	HR-WT	NA	GRCh38	7	Amplification	chr1:143766929-248847255
TCGA-A8-A08B-01A	Breast	HR-WT	NA	GRCh38	7	Amplification	chr1:215934586-248650825
TCGA-A8-A08X-01A	Breast	HR-WT	NA	GRCh38	7	Amplification	chr1:214483353-248816707
TCGA-A8-A092-01A	Breast	HR-WT	NA	GRCh38	7	Amplification	chr1:214483324-248816707
TCGA-A8-A093-01A	Breast	HR-WT	NA	GRCh38	7	Amplification	chr1:168002740-227493359
TCGA-A8-A0A2-01A	Breast	HR-WT	NA	GRCh38	7	Amplification	chr1:181410109-248890764
TCGA-AC-A3EH-01A	Breast	HR-WT	NA	GRCh38	7	Amplification	chr1:125063737-248855670
TCGA-AC-A5XU-01A	Breast	HR-WT	NA	GRCh38	7	Amplification	chr1:151853514-248930006
TCGA-AN-A0FK-01A	Breast	HR-WT	NA	GRCh38	7	Amplification	chr1:214532767-248650751
TCGA-AN-A0FZ-01A	Breast	HR-WT	NA	GRCh38	7	Amplification	chr1:201009534-248856131
TCGA-AN-A0XP-01A	Breast	HR-WT	NA	GRCh38	7	Amplification	chr1:216046438-248682157
TCGA-AQ-A0Y5-01A	Breast	HR-WT	NA	GRCh38	7	Amplification	chr1:149933385-247966387
TCGA-AQ-A54O-01A	Breast	HR-WT	NA	GRCh38	7	Amplification	chr1:146960523-248913902
TCGA-AR-A1AV-01A	Breast	HR-WT	NA	GRCh38	7	Amplification	chr1:143555617-248816707
TCGA-AR-A2LL-01A	Breast	HR-WT	NA	GRCh38	7	Amplification	chr1:143542956-248855287
TCGA-B6-A0RP-01A	Breast	HR-WT	NA	GRCh38	7	Amplification	chr1:214482726-248855287
TCGA-B6-A401-01A	Breast	HR-WT	NA	GRCh38	7	Amplification	chr1:149754709-248937246
TCGA-B6-A409-01A	Breast	HR-WT	NA	GRCh38	7	Amplification	chr1:145587578-248937100
TCGA-BH-A0B6-01A	Breast	HR-WT	NA	GRCh38	7	Amplification	chr1:179691322-248928636
TCGA-BH-A0BF-01A	Breast	HR-WT	NA	GRCh38	7	Amplification	chr1:125132161-248847255
TCGA-BH-A0BV-01A	Breast	HR-WT	NA	GRCh38	7	Amplification	chr1:186095627-248847255
TCGA-BH-A0DP-01A	Breast	HR-WT	NA	GRCh38	7	Amplification	chr1:125118086-248816707
TCGA-BH-A0E9-01B	Breast	HR-WT	NA	GRCh38	7	Amplification	chr1:145892794-248816707
TCGA-BH-A18F-01A	Breast	HR-WT	NA	GRCh38	7	Amplification	chr1:147031061-248816707
TCGA-BH-A18K-01A	Breast	HR-WT	NA	GRCh38	7	Amplification	chr1:224133934-248816707
TCGA-BH-A18L-01A	Breast	HR-WT	NA	GRCh38	7	Amplification	chr1:125179342-248739512
TCGA-BH-A18P-01A	Breast	HR-WT	NA	GRCh38	7	Amplification	chr1:214483346-248856131
TCGA-BH-A18U-01A	Breast	HR-WT	NA	GRCh38	7	Amplification	chr1:150262257-248650825
TCGA-C8-A12L-01A	Breast	HR-WT	NA	GRCh38	7	Amplification	chr1:216723101-227816138
TCGA-C8-A1HI-01A	Breast	HR-WT	NA	GRCh38	7	Amplification	chr1:149677384-248858423
TCGA-C8-A1HL-01A	Breast	HR-WT	NA	GRCh38	7	Amplification	chr1:218881831-248855287
TCGA-D8-A146-01A	Breast	HR-WT	NA	GRCh38	7	Amplification	chr1:225303212-226894149
TCGA-D8-A1JK-01A	Breast	HR-WT	NA	GRCh38	7	Amplification	chr1:160237299-248404238
TCGA-D8-A1X5-01A	Breast	HR-WT	NA	GRCh38	7	Amplification	chr1:200976725-248855287
TCGA-E2-A154-01A	Breast	HR-WT	NA	GRCh38	7	Amplification	chr1:168104906-248816707
TCGA-E2-A15A-01A	Breast	HR-WT	NA	GRCh38	7	Amplification	chr1:149934519-246335564
TCGA-E2-A15G-01A	Breast	HR-WT	NA	GRCh38	7	Amplification	chr1:125179127-248847255
TCGA-E2-A15M-01A	Breast	HR-WT	NA	GRCh38	7	Amplification	chr1:220696383-227490493
TCGA-E2-A1LI-01A	Breast	HR-WT	NA	GRCh38	7	Amplification	chr1:143264770-247974711
TCGA-E9-A1NA-01A	Breast	HR-WT	NA	GRCh38	7	Amplification	chr1:162803723-230325333
TCGA-E9-A1R3-01A	Breast	HR-WT	NA	GRCh38	7	Amplification	chr1:145454019-248812866
TCGA-E9-A1RC-01A	Breast	HR-WT	NA	GRCh38	7	Amplification	chr1:143554608-248407139
TCGA-E9-A1RF-01A	Breast	HR-WT	NA	GRCh38	7	Amplification	chr1:169824883-248816707
TCGA-E9-A5UP-01A	Breast	HR-WT	NA	GRCh38	7	Amplification	chr1:214483353-227492899
TCGA-EW-A1OY-01A	Breast	HR-WT	NA	GRCh38	7	Amplification	chr1:152219918-248856131
TCGA-EW-A2FR-01A	Breast	HR-WT	NA	GRCh38	7	Amplification	chr1:146960444-248936777
TCGA-EW-A2FS-01A	Breast	HR-WT	NA	GRCh38	7	Amplification	chr1:144104598-248916508
TCGA-23-1114-01B	Ovarian	gBRCA1/2	BRCA2	GRCh38	7	Amplification	chr1:207096512-248650825
TCGA-24-2280-01A	Ovarian	gBRCA1/2	BRCA2	GRCh38	7	Amplification	chr1:224192531-248816707
TCGA-25-2392-01A	Ovarian	gBRCA1/2	BRCA1	GRCh38	7	Amplification	chr1:214532332-248814441
TCGA-59-2351-01A	Ovarian	gBRCA1/2	BRCA2	GRCh38	7	Amplification	chr1:145608292-248773807
TCGA-61-2003-01A	Ovarian	gBRCA1/2	BRCA1	GRCh38	7	Amplification	chr1:152399558-248855917
TCGA-09-0364-01A	Ovarian	HR-WT	NA	GRCh38	7	Amplification	chr1:143545185-247435930
TCGA-09-1670-01A	Ovarian	HR-WT	NA	GRCh38	7	Amplification	chr1:214483122-233382062
TCGA-09-1674-01A	Ovarian	HR-WT	NA	GRCh38	7	Amplification	chr1:200898363-227816045
TCGA-13-0717-01A	Ovarian	HR-WT	NA	GRCh38	7	Amplification	chr1:147167783-247444865
TCGA-13-1495-01A	Ovarian	HR-WT	NA	GRCh38	7	Amplification	chr1:210859617-227626208
TCGA-20-0991-01A	Ovarian	HR-WT	NA	GRCh38	7	Amplification	chr1:207115551-248936715
TCGA-24-1464-01A	Ovarian	HR-WT	NA	GRCh38	7	Amplification	chr1:214483346-248442094
TCGA-24-2038-01A	Ovarian	HR-WT	NA	GRCh38	7	Amplification	chr1:156937088-248816707
TCGA-25-1323-01A	Ovarian	HR-WT	NA	GRCh38	7	Amplification	chr1:190161078-248816707
TCGA-61-1727-01A	Ovarian	HR-WT	NA	GRCh38	7	Amplification	chr1:224236739-229096764
TCGA-61-1740-01A	Ovarian	HR-WT	NA	GRCh38	7	Amplification	chr1:214532332-248914144
TCGA-AC-A3BB-01A	Breast	gBRCA1/2	BRCA2	GRCh38	8	Amplification	chr1:143449351-248928736
TCGA-D8-A147-01A	Breast	gBRCA1/2	BRCA1	GRCh38	8	Amplification	chr1:226146903-233378851
TCGA-E9-A22E-01A	Breast	gBRCA1/2	BRCA1	GRCh38	8	Amplification	chr1:197101566-242288719
TCGA-A2-A0CX-01A	Breast	HR-WT	NA	GRCh38	8	Amplification	chr1:199909041-248084006
TCGA-A2-A0SV-01A	Breast	HR-WT	NA	GRCh38	8	Amplification	chr1:205351299-226438983
TCGA-A2-A0YH-01A	Breast	HR-WT	NA	GRCh38	8	Amplification	chr1:215083544-248917420
TCGA-A7-A26E-01A	Breast	HR-WT	NA	GRCh38	8	Amplification	chr1:214532332-248936765
TCGA-A8-A07W-01A	Breast	HR-WT	NA	GRCh38	8	Amplification	chr1:156957958-248914144
TCGA-A8-A09Q-01A	Breast	HR-WT	NA	GRCh38	8	Amplification	chr1:224661655-229643871
TCGA-A8-A0A6-01A	Breast	HR-WT	NA	GRCh38	8	Amplification	chr1:214483353-248388654
TCGA-A8-A0AB-01A	Breast	HR-WT	NA	GRCh38	8	Amplification	chr1:149197753-248816707
TCGA-AC-A2BK-01A	Breast	HR-WT	NA	GRCh38	8	Amplification	chr1:223112490-227493488
TCGA-AC-A3TN-01A	Breast	HR-WT	NA	GRCh38	8	Amplification	chr1:143497063-248816707
TCGA-AN-A0FW-01A	Breast	HR-WT	NA	GRCh38	8	Amplification	chr1:201325978-230323730
TCGA-AR-A250-01A	Breast	HR-WT	NA	GRCh38	8	Amplification	chr1:143266947-248917151
TCGA-AR-A254-01A	Breast	HR-WT	NA	GRCh38	8	Amplification	chr1:206937590-248650825
TCGA-BH-A0B3-01A	Breast	HR-WT	NA	GRCh38	8	Amplification	chr1:216421963-248936569
TCGA-BH-A0C1-01B	Breast	HR-WT	NA	GRCh38	8	Amplification	chr1:143231426-248857183
TCGA-BH-A42T-01A	Breast	HR-WT	NA	GRCh38	8	Amplification	chr1:190618601-248937100
TCGA-D8-A142-01A	Breast	HR-WT	NA	GRCh38	8	Amplification	chr1:167546034-248816707
TCGA-D8-A1X7-01A	Breast	HR-WT	NA	GRCh38	8	Amplification	chr1:214483018-248917323
TCGA-D8-A27T-01A	Breast	HR-WT	NA	GRCh38	8	Amplification	chr1:143264434-248855287
TCGA-E2-A1IN-01A	Breast	HR-WT	NA	GRCh38	8	Amplification	chr1:143194806-248847255
TCGA-E9-A1NI-01A	Breast	HR-WT	NA	GRCh38	8	Amplification	chr1:175135659-248855287
TCGA-E9-A1RA-01A	Breast	HR-WT	NA	GRCh38	8	Amplification	chr1:224012720-235078484
TCGA-E9-A249-01A	Breast	HR-WT	NA	GRCh38	8	Amplification	chr1:201211033-248682157
TCGA-EW-A3U0-01A	Breast	HR-WT	NA	GRCh38	8	Amplification	chr1:223111185-237926957
TCGA-JL-A3YW-01A	Breast	HR-WT	NA	GRCh38	8	Amplification	chr1:170369505-248936569
TCGA-OL-A66K-01A	Breast	HR-WT	NA	GRCh38	8	Amplification	chr1:143542956-247966002
TCGA-09-2051-01A	Ovarian	gBRCA1/2	BRCA1	GRCh38	8	Amplification	chr1:224175667-248855917
TCGA-29-1688-01A	Ovarian	gBRCA1/2	BRCA1	GRCh38	8	Amplification	chr1:219986809-248441241
TCGA-24-1413-01A	Ovarian	HR-WT	NA	GRCh38	8	Amplification	chr1:214483324-227816138
TCGA-25-2396-01A	Ovarian	HR-WT	NA	GRCh38	8	Amplification	chr1:214483069-247492214
TCGA-61-2009-01A	Ovarian	HR-WT	NA	GRCh38	8	Amplification	chr1:152358763-247833587
TCGA-61-2111-01A	Ovarian	HR-WT	NA	GRCh38	8	Amplification	chr1:125088087-248855917
TCGA-A2-A3XT-01A	Breast	HR-WT	NA	GRCh38	9	Amplification	chr1:152787473-248936765
TCGA-A8-A09I-01A	Breast	HR-WT	NA	GRCh38	9	Amplification	chr1:223394460-228782852
TCGA-AC-A23G-01A	Breast	HR-WT	NA	GRCh38	9	Amplification	chr1:125179849-248811727
TCGA-AN-A0FT-01A	Breast	HR-WT	NA	GRCh38	9	Amplification	chr1:215586637-235813294
TCGA-AO-A12D-01A	Breast	HR-WT	NA	GRCh38	9	Amplification	chr1:224575212-227780406
TCGA-B6-A1KF-01A	Breast	HR-WT	NA	GRCh38	9	Amplification	chr1:214608297-227411264
TCGA-D8-A143-01A	Breast	HR-WT	NA	GRCh38	9	Amplification	chr1:146616947-248848201
TCGA-E2-A1B0-01A	Breast	HR-WT	NA	GRCh38	9	Amplification	chr1:143523597-248816707
TCGA-E2-A1BD-01A	Breast	HR-WT	NA	GRCh38	9	Amplification	chr1:201211043-227298669
TCGA-E9-A226-01A	Breast	HR-WT	NA	GRCh38	9	Amplification	chr1:158524625-248856131
TCGA-WT-AB44-01A	Breast	HR-WT	NA	GRCh38	9	Amplification	chr1:225289788-242975052
TCGA-23-2077-01A	Ovarian	gBRCA1/2	BRCA1	GRCh38	9	Amplification	chr1:220881418-248814441
TCGA-A2-A04U-01A	Breast	HR-WT	NA	GRCh38	10	Amplification	chr1:226297903-230325084
TCGA-AN-A03Y-01A	Breast	HR-WT	NA	GRCh38	10	Amplification	chr1:169733832-227493082
TCGA-AO-A0J4-01A	Breast	HR-WT	NA	GRCh38	10	Amplification	chr1:212619237-248855199
TCGA-AO-A12F-01A	Breast	HR-WT	NA	GRCh38	10	Amplification	chr1:214613291-227845632
TCGA-B6-A0IH-01A	Breast	HR-WT	NA	GRCh38	10	Amplification	chr1:149790448-248848470
TCGA-B6-A0WX-01A	Breast	HR-WT	NA	GRCh38	10	Amplification	chr1:143449351-248814441
TCGA-24-1469-01A	Ovarian	HR-WT	NA	GRCh38	10	Amplification	chr1:225567445-247452056
TCGA-29-1783-01A	Ovarian	HR-WT	NA	GRCh38	10	Amplification	chr1:218436359-237926957
TCGA-E2-A153-01A	Breast	HR-WT	NA	GRCh38	11	Amplification	chr1:144045638-248816707
TCGA-E9-A3X8-01A	Breast	HR-WT	NA	GRCh38	11	Amplification	chr1:143267112-248824965
TCGA-E9-A1R7-01A	Breast	HR-WT	NA	GRCh38	12	Amplification	chr1:224013942-230262699
TCGA-E9-A54Y-01A	Breast	HR-WT	NA	GRCh38	12	Amplification	chr1:214483396-227493579
TCGA-B6-A402-01A	Breast	HR-WT	NA	GRCh38	13	Amplification	chr1:147053939-248181140
TCGA-13-0913-01A	Ovarian	gBRCA1/2	BRCA2	GRCh38	13	Amplification	chr1:223784159-227411378
TCGA-24-0982-01A	Ovarian	HR-WT	NA	GRCh38	13	Amplification	chr1:224955007-226439373
TCGA-29-1770-01A	Ovarian	gBRCA1/2	BRCA1	GRCh38	14	Amplification	chr1:224680893-245763940
TCGA-AN-A0AJ-01A	Breast	HR-WT	NA	GRCh38	No CN reported for locus	No CN reported for locus	NA
TCGA-AN-A0FF-01A	Breast	HR-WT	NA	GRCh38	No CN reported for locus	No CN reported for locus	NA
TCGA-AR-A0TY-01A	Breast	HR-WT	NA	GRCh38	No CN reported for locus	No CN reported for locus	NA
