# Supplementary material for: Analysis of matched primary and recurrent BRCA1/2 mutation-associated tumors identifies recurrence-specific drivers
Source: Research Square preprint supplement (doi:10.21203/rs.3.rs-745248/v1), 2021-08-30
Supplement: Supplementary file 2 [file 558251697cb110829a4ea79e.xlsx]

## Sheet: Survival_analysis_variables
Patient	Cohort	BRCA2-001/Short in Primary Tumor	BRCA2-001/Short in Recurrence	BRCA2-001/Short in Any Tumor	Tumor Type	Germline Mutation Gene	Overall Survival (Months)	Recurred	Age_at_Dx	Stage at Diagnosis	ER Status of Primary Tumor
3	PrimaryRecurrent_cohort_tumors	FALSE	FALSE	FALSE	breast	BRCA1	245.88	Yes	49.88	IIB	ER-
4	PrimaryRecurrent_cohort_tumors	FALSE	FALSE	FALSE	breast	BRCA1	173.28	Yes	26.36	IA	ER-
5	PrimaryRecurrent_cohort_tumors	FALSE	TRUE	TRUE	breast	BRCA1	34.32	Yes	48.78	IIB	ER-
6	PrimaryRecurrent_cohort_tumors	FALSE	TRUE	TRUE	breast	BRCA1	71.16	Yes	57.47	IB	ER-
7	PrimaryRecurrent_cohort_tumors	FALSE	TRUE	TRUE	breast	BRCA1	57.24	Yes	47.42	IIIB	ER-
8	PrimaryRecurrent_cohort_tumors	TRUE	TRUE	TRUE	breast	BRCA1	80.16	Yes	56.44	IIIB	ER-
9	PrimaryRecurrent_cohort_tumors	TRUE	TRUE	TRUE	breast	BRCA1	75.72	Yes	55.79	IIB	ER-
12	PrimaryRecurrent_cohort_tumors	FALSE	FALSE	FALSE	breast	BRCA2	128.76	Yes	47.68	IIA	ER+
13	PrimaryRecurrent_cohort_tumors	FALSE	TRUE	TRUE	breast	BRCA2	46.56	Yes	28.44	IIA	ER-
14	PrimaryRecurrent_cohort_tumors	no_primary_evaluated	FALSE	FALSE	ovary	BRCA1	99	Yes	55.52	IIC	NA
15	PrimaryRecurrent_cohort_tumors	FALSE	TRUE	TRUE	ovary	BRCA1	75.96	Yes	46.25	IIIC	NA
16	PrimaryRecurrent_cohort_tumors	FALSE	FALSE	FALSE	ovary	BRCA1	58.56	Yes	49.95	IIB	NA
17	PrimaryRecurrent_cohort_tumors	TRUE	TRUE	TRUE	ovary	BRCA1	161.52	Yes	44.09	IC	NA
18	PrimaryRecurrent_cohort_tumors	FALSE	TRUE	TRUE	ovary	BRCA1	100.8	Yes	51.83	IIIC	NA
19	PrimaryRecurrent_cohort_tumors	FALSE	TRUE	TRUE	ovary	BRCA1	96.6	Yes	66.28	IV	NA
20	PrimaryRecurrent_cohort_tumors	FALSE	TRUE	TRUE	ovary	BRCA1	132.24	Yes	41.06	III	NA
21	PrimaryRecurrent_cohort_tumors	FALSE	TRUE	TRUE	ovary	BRCA1	28.32	Yes	49.86	Unknown	NA
22	PrimaryRecurrent_cohort_tumors	FALSE	TRUE	TRUE	ovary	BRCA1	93.36	Yes	60.21	IIIC	NA
23	PrimaryRecurrent_cohort_tumors	FALSE	TRUE	TRUE	ovary	BRCA1	196.8	Yes	51.34	IIC	NA
24	PrimaryRecurrent_cohort_tumors	FALSE	TRUE	TRUE	ovary	BRCA2	134.52	Yes	43.67	IIIC	NA
25	PrimaryRecurrent_cohort_tumors	FALSE	FALSE	FALSE	ovary	BRCA2	33.48	Yes	42.41	IIIC	NA
26	PrimaryRecurrent_cohort_tumors	TRUE	no_recurrence_evaluated	TRUE	ovary	BRCA2	39.24	Yes	48.17	III	NA
27	PrimaryRecurrent_cohort_tumors	no_primary_evaluated	FALSE	FALSE	ovary	BRCA2	100.2	Yes	72.96	IIIC	NA
28	PrimaryRecurrent_cohort_tumors	no_primary_evaluated	TRUE	TRUE	ovary	BRCA1	99.48	Yes	32.73	IIIC	NA
29	PrimaryRecurrent_cohort_tumors	no_primary_evaluated	FALSE	FALSE	ovary	BRCA1	86.76	Yes	51.76	IA	NA
30	PrimaryRecurrent_cohort_tumors	no_primary_evaluated	FALSE	FALSE	ovary	BRCA2	234.36	Yes	44.96	IV	NA
31	PrimaryRecurrent_cohort_tumors	no_primary_evaluated	FALSE	FALSE	ovary	BRCA2	35.52	Yes	34.67	IIB	NA
44	PrimaryTumors_forRNAseq	FALSE	no_recurrence_evaluated	FALSE	breast	BRCA1	103	Unknown	Unknown	Unknown	Unknown
45	PrimaryTumors_forRNAseq	FALSE	no_recurrence_evaluated	FALSE	breast	BRCA1	137	No	41.2	I	ER+
46	PrimaryTumors_forRNAseq	FALSE	no_recurrence_evaluated	FALSE	breast	BRCA1	110	No	52.99	IA	ER-
47	PrimaryTumors_forRNAseq	FALSE	no_recurrence_evaluated	FALSE	breast	BRCA1	100	No	36.95	IIA	ER-
48	PrimaryTumors_forRNAseq	TRUE	no_recurrence_evaluated	TRUE	breast	BRCA1	134	No	38.16	I	ER-
49	PrimaryTumors_forRNAseq	FALSE	no_recurrence_evaluated	FALSE	breast	BRCA1	175	No	42.45	III	ER-
50	PrimaryTumors_forRNAseq	FALSE	no_recurrence_evaluated	FALSE	breast	BRCA1	159	No	46.26	II	ER-
51	PrimaryTumors_forRNAseq	FALSE	no_recurrence_evaluated	FALSE	breast	BRCA1	142	No	34.82	II	ER+
52	PrimaryTumors_forRNAseq	TRUE	no_recurrence_evaluated	TRUE	breast	BRCA1	132	No	52.12	IIA	ER-
53	PrimaryTumors_forRNAseq	FALSE	no_recurrence_evaluated	FALSE	breast	BRCA1	126	No	41.16	II	ER-
54	PrimaryTumors_forRNAseq	TRUE	no_recurrence_evaluated	TRUE	breast	BRCA1	117	No	57.49	IA	ER-
55	PrimaryTumors_forRNAseq	TRUE	no_recurrence_evaluated	TRUE	breast	BRCA1	0.5	No	40.25	IV	ER+
56	PrimaryTumors_forRNAseq	FALSE	no_recurrence_evaluated	FALSE	breast	BRCA1	121	No	52.43	IIB	ER-
57	PrimaryTumors_forRNAseq	FALSE	no_recurrence_evaluated	FALSE	breast	BRCA1	96	No	29.29	I	ER-
58	PrimaryTumors_forRNAseq	FALSE	no_recurrence_evaluated	FALSE	breast	BRCA1	71	Yes	32.9	IB	ER+
59	PrimaryTumors_forRNAseq	FALSE	no_recurrence_evaluated	FALSE	breast	BRCA1	103	No	39.45	IIB	ER+
60	PrimaryTumors_forRNAseq	FALSE	no_recurrence_evaluated	FALSE	breast	BRCA1	91	No	54.23	IA	ER+
61	PrimaryTumors_forRNAseq	FALSE	no_recurrence_evaluated	FALSE	breast	BRCA2	239	Yes	38.83	IIB	ER-
62	PrimaryTumors_forRNAseq	FALSE	no_recurrence_evaluated	FALSE	breast	BRCA2	24	Unknown	54.43	IA	ER+
63	PrimaryTumors_forRNAseq	TRUE	no_recurrence_evaluated	TRUE	breast	BRCA2	124	No	33.71	I	ER+
64	PrimaryTumors_forRNAseq	FALSE	no_recurrence_evaluated	FALSE	breast	BRCA2	103	Yes	35.51	IIB	ER+
65	PrimaryTumors_forRNAseq	FALSE	no_recurrence_evaluated	FALSE	breast	BRCA2	75	No	49.56	I	ER-
66	PrimaryTumors_forRNAseq	TRUE	no_recurrence_evaluated	TRUE	breast	BRCA2	87	No	48.13	I	ER+
67	PrimaryTumors_forRNAseq	FALSE	no_recurrence_evaluated	FALSE	breast	BRCA2	57	No	40.28	IIB	ER+
68	PrimaryTumors_forRNAseq	TRUE	no_recurrence_evaluated	TRUE	breast	BRCA2	96	Yes	41.95	I	ER+
70	PrimaryTumors_forRNAseq	FALSE	no_recurrence_evaluated	FALSE	ovary	BRCA1	89	Yes	61.46	IIIC	NA
72	PrimaryTumors_forRNAseq	FALSE	no_recurrence_evaluated	FALSE	ovary	BRCA1	162	No	53.37	IIC	NA
73	PrimaryTumors_forRNAseq	FALSE	no_recurrence_evaluated	FALSE	ovary	BRCA1	39	Yes	53.87	IV	NA
74	PrimaryTumors_forRNAseq	FALSE	no_recurrence_evaluated	FALSE	ovary	BRCA1	15	Yes	24.96	IV	NA
75	PrimaryTumors_forRNAseq	TRUE	no_recurrence_evaluated	TRUE	ovary	BRCA1	124	No	58.87	IIIC	NA
76	PrimaryTumors_forRNAseq	TRUE	no_recurrence_evaluated	TRUE	ovary	BRCA1	33	Yes	57.18	IIIB	NA
77	PrimaryTumors_forRNAseq	FALSE	no_recurrence_evaluated	FALSE	ovary	BRCA1	112	No	50.1	IIIC	NA
78	PrimaryTumors_forRNAseq	FALSE	no_recurrence_evaluated	FALSE	ovary	BRCA1	57	Yes	57.63	IIIC	NA
79	PrimaryTumors_forRNAseq	TRUE	no_recurrence_evaluated	TRUE	ovary	BRCA1	138	Yes	54.58	IIIC	NA
80	PrimaryTumors_forRNAseq	TRUE	no_recurrence_evaluated	TRUE	ovary	BRCA1	106	Yes	57.09	IIIC	NA
81	PrimaryTumors_forRNAseq	TRUE	no_recurrence_evaluated	TRUE	ovary	BRCA2	105	Yes	63.03	IIIC	NA
82	PrimaryTumors_forRNAseq	FALSE	no_recurrence_evaluated	FALSE	ovary	BRCA2	138	No	51.81	IV	NA
83	PrimaryTumors_forRNAseq	FALSE	no_recurrence_evaluated	FALSE	ovary	BRCA2	78	Yes	52.74	IB	NA
84	PrimaryTumors_forRNAseq	FALSE	no_recurrence_evaluated	FALSE	ovary	BRCA2	191	No	69.96	IIIC	NA
85	PrimaryTumors_forRNAseq	FALSE	no_recurrence_evaluated	FALSE	ovary	BRCA2	71	Yes	73.92	IIIC	NA

## Sheet: BRCA2_isoform_exp_bySample
Sample	Patient	Cohort	Germline Mutation Gene	Tissue Origin	Sample Type	BRCA2-001/Short Transcript Abundance	BRCA2-201/Long Transcript Abundance
3-1	3	PrimaryRecurrent_cohort	BRCA1	Breast	Primary Tumor	0	10.9731
3-2	3	PrimaryRecurrent_cohort	BRCA1	Breast	Recurrence #1	0	14.2248
4-1	4	PrimaryRecurrent_cohort	BRCA1	Breast	Primary Tumor	0	9.96563
4-2	4	PrimaryRecurrent_cohort	BRCA1	Breast	Recurrence #1	0	4.12694
5-1	5	PrimaryRecurrent_cohort	BRCA1	Breast	Primary Tumor	0	7.49261
5-2	5	PrimaryRecurrent_cohort	BRCA1	Breast	Recurrence #1	4.82372	0
6-1	6	PrimaryRecurrent_cohort	BRCA1	Breast	Primary Tumor	0	2.87913
6-2	6	PrimaryRecurrent_cohort	BRCA1	Breast	Recurrence #1	4.18901	0
6-3	6	PrimaryRecurrent_cohort	BRCA1	Breast	Recurrence #2	11.2439	0
6-4	6	PrimaryRecurrent_cohort	BRCA1	Breast	Recurrence #3	11.6386	0
7-1	7	PrimaryRecurrent_cohort	BRCA1	Breast	Primary Tumor	0	4.70678
7-2	7	PrimaryRecurrent_cohort	BRCA1	Breast	Recurrence #1	10.6844	0
8-1	8	PrimaryRecurrent_cohort	BRCA1	Breast	Primary Tumor	10.451	0
8-2	8	PrimaryRecurrent_cohort	BRCA1	Breast	Recurrence #1	11.4741	0.000246296
9-1	9	PrimaryRecurrent_cohort	BRCA1	Breast	Primary Tumor	23.0222	0
9-2	9	PrimaryRecurrent_cohort	BRCA1	Breast	Recurrence #1	25.0352	0
12-1	12	PrimaryRecurrent_cohort	BRCA2	Breast	Primary Tumor	0	1.98054
12-2	12	PrimaryRecurrent_cohort	BRCA2	Breast	Recurrence #1	0	1.88398
13-1	13	PrimaryRecurrent_cohort	BRCA2	Breast	Primary Tumor	0	3.07142
13-2	13	PrimaryRecurrent_cohort	BRCA2	Breast	Recurrence #1	8.88544	0
14-2	14	PrimaryRecurrent_cohort	BRCA1	Ovary	Recurrence #1	0	3.65716
15-1	15	PrimaryRecurrent_cohort	BRCA1	Ovary	Primary Tumor	0	3.38677
15-2	15	PrimaryRecurrent_cohort	BRCA1	Ovary	Recurrence #1	4.90848	0
16-1	16	PrimaryRecurrent_cohort	BRCA1	Ovary	Primary Tumor	0	2.51877
16-2	16	PrimaryRecurrent_cohort	BRCA1	Ovary	Recurrence #1	0	2.69148
17-1	17	PrimaryRecurrent_cohort	BRCA1	Ovary	Primary Tumor	12.0152	0
17-2	17	PrimaryRecurrent_cohort	BRCA1	Ovary	Recurrence #1	0	4.56545
18-1	18	PrimaryRecurrent_cohort	BRCA1	Ovary	Primary Tumor	0	6.75504
18-2	18	PrimaryRecurrent_cohort	BRCA1	Ovary	Recurrence #1	14.7427	0
19-1	19	PrimaryRecurrent_cohort	BRCA1	Ovary	Primary Tumor	0	9.54381
19-2	19	PrimaryRecurrent_cohort	BRCA1	Ovary	Recurrence #1	0	9.35399
19-3	19	PrimaryRecurrent_cohort	BRCA1	Ovary	Recurrence #2	10	0
20-1	20	PrimaryRecurrent_cohort	BRCA1	Ovary	Primary Tumor	0	3.34434
20-2	20	PrimaryRecurrent_cohort	BRCA1	Ovary	Recurrence #1	6.03994	0
20-4	20	PrimaryRecurrent_cohort	BRCA1	Ovary	Recurrence #3	4.63884	0
20-5	20	PrimaryRecurrent_cohort	BRCA1	Ovary	Recurrence #4	6.78859	0
21-2	21	PrimaryRecurrent_cohort	BRCA1	Ovary	Recurrence #1	0	3.68289
21-3	21	PrimaryRecurrent_cohort	BRCA1	Ovary	Recurrence #2	6.95071	0.00247924
21-5	21	PrimaryRecurrent_cohort	BRCA1	Ovary	Recurrence #4	0	2.14459
21-6	21	PrimaryRecurrent_cohort	BRCA1	Ovary	Recurrence #5	4.09235	0
22-1	22	PrimaryRecurrent_cohort	BRCA1	Ovary	Primary Tumor	0	9.61056
22-2	22	PrimaryRecurrent_cohort	BRCA1	Ovary	Recurrence #1	7.29013	0
23-1	23	PrimaryRecurrent_cohort	BRCA1	Ovary	Primary Tumor	0	5.73661
23-2	23	PrimaryRecurrent_cohort	BRCA1	Ovary	Recurrence #1	11.0791	0
24-1	24	PrimaryRecurrent_cohort	BRCA2	Ovary	Primary Tumor	0	2.39314
24-2	24	PrimaryRecurrent_cohort	BRCA2	Ovary	Recurrence #1	2.22633	0
25-1	25	PrimaryRecurrent_cohort	BRCA2	Ovary	Primary Tumor	0	2.65494
25-2	25	PrimaryRecurrent_cohort	BRCA2	Ovary	Recurrence #1	0	4.86541
26-1	26	PrimaryRecurrent_cohort	BRCA2	Ovary	Primary Tumor	3.73896	0
27-2	27	PrimaryRecurrent_cohort	BRCA2	Ovary	Recurrence #1	0	3.27743
28-2	28	PrimaryRecurrent_cohort	BRCA1	Ovary	Recurrence #1	2.86918	0
29-2	29	PrimaryRecurrent_cohort	BRCA1	Ovary	Recurrence #1	0	7.26636
30-2	30	PrimaryRecurrent_cohort	BRCA2	Ovary	Recurrence #1	0	3.7712
31-2	31	PrimaryRecurrent_cohort	BRCA2	Ovary	Recurrence #1	0	3.92288
32-0	32	PrimaryRecurrent_cohort	BRCA1	Breast	Normal Tissue	0	1.85194
33-0	33	PrimaryRecurrent_cohort	BRCA1	Breast	Normal Tissue	0	1.71232
34-0	34	PrimaryRecurrent_cohort	BRCA1	Breast	Normal Tissue	0	2.27121
35-0	35	PrimaryRecurrent_cohort	BRCA2	Breast	Normal Tissue	0	1.60722
36-0	36	PrimaryRecurrent_cohort	BRCA2	Breast	Normal Tissue	0	3.12663
37-0	37	PrimaryRecurrent_cohort	BRCA2	Breast	Normal Tissue	0	2.93346
38-0	38	PrimaryRecurrent_cohort	BRCA1	Fallopian tube	Normal Tissue	0	0.779282
39-0	39	PrimaryRecurrent_cohort	BRCA1	Fallopian tube	Normal Tissue	0	0.882418
40-0	40	PrimaryRecurrent_cohort	BRCA2	Fallopian tube	Normal Tissue	0	2.15445
41-0	41	PrimaryRecurrent_cohort	BRCA2	Fallopian tube	Normal Tissue	0	1.49546
42-0	42	PrimaryRecurrent_cohort	BRCA2	Fallopian tube	Normal Tissue	0	1.23306
43-0	43	PrimaryRecurrent_cohort	BRCA2	Fallopian tube	Normal Tissue	0	1.06524
44-1	44	PrimaryTumors_forRNAseq	BRCA1	Breast	Primary Tumor	0	5.77752
45-1	45	PrimaryTumors_forRNAseq	BRCA1	Breast	Primary Tumor	0	6.65976
46-1	46	PrimaryTumors_forRNAseq	BRCA1	Breast	Primary Tumor	0	4.14754
47-1	47	PrimaryTumors_forRNAseq	BRCA1	Breast	Primary Tumor	0	3.81013
48-1	48	PrimaryTumors_forRNAseq	BRCA1	Breast	Primary Tumor	5.66339	0
49-1	49	PrimaryTumors_forRNAseq	BRCA1	Breast	Primary Tumor	0	3.15871
50-1	50	PrimaryTumors_forRNAseq	BRCA1	Breast	Primary Tumor	0	3.57105
51-1	51	PrimaryTumors_forRNAseq	BRCA1	Breast	Primary Tumor	0	10.2299
52-1	52	PrimaryTumors_forRNAseq	BRCA1	Breast	Primary Tumor	8.55084	0
53-1	53	PrimaryTumors_forRNAseq	BRCA1	Breast	Primary Tumor	0	4.61113
54-1	54	PrimaryTumors_forRNAseq	BRCA1	Breast	Primary Tumor	7.40641	0
55-1	55	PrimaryTumors_forRNAseq	BRCA1	Breast	Primary Tumor	6.27548	0
56-1	56	PrimaryTumors_forRNAseq	BRCA1	Breast	Primary Tumor	0	5.03481
57-1	57	PrimaryTumors_forRNAseq	BRCA1	Breast	Primary Tumor	0	5.57096
58-1	58	PrimaryTumors_forRNAseq	BRCA1	Breast	Primary Tumor	0	5.69584
59-1	59	PrimaryTumors_forRNAseq	BRCA1	Breast	Primary Tumor	0	4.53744
60-1	60	PrimaryTumors_forRNAseq	BRCA1	Breast	Primary Tumor	0	3.74444
61-1	61	PrimaryTumors_forRNAseq	BRCA2	Breast	Primary Tumor	0	14.2399
62-1	62	PrimaryTumors_forRNAseq	BRCA2	Breast	Primary Tumor	0	3.97347
63-1	63	PrimaryTumors_forRNAseq	BRCA2	Breast	Primary Tumor	0.00336974	2.36465
64-1	64	PrimaryTumors_forRNAseq	BRCA2	Breast	Primary Tumor	0	1.7011
65-1	65	PrimaryTumors_forRNAseq	BRCA2	Breast	Primary Tumor	0	7.51015
66-1	66	PrimaryTumors_forRNAseq	BRCA2	Breast	Primary Tumor	0.0163486	1.98479
67-1	67	PrimaryTumors_forRNAseq	BRCA2	Breast	Primary Tumor	0	2.79888
68-1	68	PrimaryTumors_forRNAseq	BRCA2	Breast	Primary Tumor	2.60016	0
69-1	69	PrimaryTumors_forRNAseq	BRCA1	Ovary	Primary Tumor	0	4.15655
70-1	70	PrimaryTumors_forRNAseq	BRCA1	Ovary	Primary Tumor	0	3.92696
71-1	71	PrimaryTumors_forRNAseq	BRCA1	Ovary	Primary Tumor	0	6.13666
72-1	72	PrimaryTumors_forRNAseq	BRCA1	Ovary	Primary Tumor	0	8.44473
73-1	73	PrimaryTumors_forRNAseq	BRCA1	Ovary	Primary Tumor	0	6.39671
74-1	74	PrimaryTumors_forRNAseq	BRCA1	Ovary	Primary Tumor	0	3.8233
75-1	75	PrimaryTumors_forRNAseq	BRCA1	Ovary	Primary Tumor	8.11292	0
76-1	76	PrimaryTumors_forRNAseq	BRCA1	Ovary	Primary Tumor	7.57034	0
77-1	77	PrimaryTumors_forRNAseq	BRCA1	Ovary	Primary Tumor	0	2.06956
78-1	78	PrimaryTumors_forRNAseq	BRCA1	Ovary	Primary Tumor	0	2.53413
79-1	79	PrimaryTumors_forRNAseq	BRCA1	Ovary	Primary Tumor	10.3565	0
80-1	80	PrimaryTumors_forRNAseq	BRCA1	Ovary	Primary Tumor	6.47351	0
81-1	81	PrimaryTumors_forRNAseq	BRCA2	Ovary	Primary Tumor	5.46737	0
82-1	82	PrimaryTumors_forRNAseq	BRCA2	Ovary	Primary Tumor	0	2.40613
83-1	83	PrimaryTumors_forRNAseq	BRCA2	Ovary	Primary Tumor	0	2.9325
84-1	84	PrimaryTumors_forRNAseq	BRCA2	Ovary	Primary Tumor	0	1.91123
85-1	85	PrimaryTumors_forRNAseq	BRCA2	Ovary	Primary Tumor	0	5.87819

## Sheet: Cox_PH_model_breast
Call:
coxph(formula = Surv(OS_months, OS_status) ~ ENST00000380152.3_in_any_tumor,
data = brca2.survival.Basser %>% filter(tissue_origin == "breast"))
n= 34, number of events= 34
	coef	exp(coef)	se(coef)	z	Pr(>|z|)
ENST00000380152.3_in_any_tumorTRUE	0.9302	2.535	0.3905	2.382	0.0172 *
---
Signif. codes: 0 ‘***’ 0.001 ‘**’ 0.01 ‘*’ 0.05 ‘.’ 0.1 ‘ ’ 1
	exp(coef)	exp(-coef)	lower .95	upper .95
ENST00000380152.3_in_any_tumorTRUE	2.535	0.3945	1.179	5.45
Concordance= 0.61 (se = 0.044 )
Likelihood ratio test= 5.44 on 1 df, p=0.02
Wald test = 5.67 on 1 df, p=0.02
Score (logrank) test = 6.07 on 1 df, p=0.01

## Sheet: Cox_PH_model_ovary
Call:
coxph(formula = Surv(OS_months, OS_status) ~ ENST00000380152.3_in_any_tumor +
Recurred, data = brca2.survival.Basser %>% filter(tissue_origin == "ovary"))
n= 33, number of events= 33
(2 observations deleted due to missingness)
coef	exp(coef)	se(coef)	z	Pr(>|z|)
ENST00000380152.3_in_any_tumorTRUE	-0.4666	0.6271	0.3914	-1.192	0.2332
RecurredYes	1.0433	2.8384	0.5394	1.934	0.0531	.
---
Signif. codes: 0 ‘***’ 0.001 ‘**’ 0.01 ‘*’ 0.05 ‘.’ 0.1 ‘ ’ 1
	exp(coef)	exp(-coef)	lower .95	upper .95
ENST00000380152.3_in_any_tumorTRUE	0.6271	1.5945	0.2912	1.351
RecurredYes	2.8384	0.3523	0.9861	8.17
Concordance= 0.675 (se = 0.047 )
Likelihood ratio test= 4.32 on 2 df, p=0.1
Wald test = 3.98 on 2 df, p=0.1
Score (logrank) test = 4.09 on 2 df, p=0.1

## Sheet: Glossary
Term	Transcript
BRCA2-001/Short	ENST00000380152.3
BRCA2-201/Long	ENST00000544455.1
