# Supplementary material for: Analysis of matched primary and recurrent BRCA1/2 mutation-associated tumors identifies recurrence-specific drivers
Source: Research Square preprint supplement (doi:10.21203/rs.3.rs-745248/v1), 2021-08-30
Supplement: Supplementary file 4 [file 6faacdd09b2388989ccaaccf.xlsx]

## Sheet: All_TumorVsNormal_GSEA
ID	Description	setSize	enrichmentScore	NES	pvalue	p.adjust	qvalues	rank	leading_edge	core_enrichment	Phenotype
HALLMARK_ALLOGRAFT_REJECTION	HALLMARK_ALLOGRAFT_REJECTION	186	0.53388	2.56668	1e-10	4.16667e-10	1.57895e-10	4698	tags=47%, list=19%, signal=38%	CXCL9/INHBA/MMP9/CXCL13/BCAT1/IL2RB/CDKN2A/CD80/IL1B/CCR1/GZMB/IL12RB1/TNF/CCL11/C2/IL10/STAT1/HLA-DMB/NME1/LCK/CD3D/CD86/IL27RA/TAP1/CAPG/HLA-DQA1/ITGB2/LTB/BCL3/PTPN6/CD3G/SOCS1/TAP2/ICAM1/CXCR3/LY86/GPR65/TPD52/IL2RG/RIPK2/IL11/CSK/PSMB10/TRAF2/CTSS/TAPBP/EIF5A/LY75/GZMA/HLA-DMA/TIMP1/AKT1/LCP2/HLA-DOB/LIF/HLA-DOA/LYN/MTIF2/ST8SIA4/BRCA1/MRPL3/GCNT1/HLA-DRA/IL2RA/IFNAR2/CD74/FASLG/WAS/CCL5/CRT…	Enriched in Tumor
HALLMARK_DNA_REPAIR	HALLMARK_DNA_REPAIR	148	0.494561	2.37242	1e-10	4.16667e-10	1.57895e-10	7456	tags=54%, list=30%, signal=38%	ZWINT/FEN1/SAC3D1/PCNA/TYMS/CMPK2/BOLA2/PNP/NME1/ZNF707/RPA3/PDE6G/ALYREF/RFC4/RALA/POLD1/ADRM1/VPS37D/GUK1/RAD51/POLR2H/RAE1/RFC2/HPRT1/SEC61A1/NCBP2/TAF13/STX3/PRIM1/POLR2G/ITPA/ZNRD1/POLR2K/RFC5/TAF6/TARBP2/ARL6IP1/RFC3/SSRP1/NELFE/POLA2/POLR2D/NME3/NELFCD/POLR2I/BCAP31/POLD3/RBX1/DAD1/CLP1/TMED2/RRM2B/HCLS1/NT5C/SUPT4H1/CANT1/NELFB/GTF2A2/VPS28/POLH/APRT/POLR1C/POLD4/UMPS/COX17/POLR3C/TAF12/E…	Enriched in Tumor
HALLMARK_E2F_TARGETS	HALLMARK_E2F_TARGETS	195	0.762831	3.72358	1e-10	4.16667e-10	1.57895e-10	2631	tags=52%, list=11%, signal=47%	MYBL2/CDCA8/RRM2/MELK/CDK1/KIF18B/BIRC5/SPC25/DEPDC1/AURKB/PLK1/SPC24/ASF1B/CDCA3/ESPL1/DLGAP5/RAD51AP1/PTTG1/KIF2C/CCNE1/GINS1/HMMR/CDC20/CDKN3/CDC25A/MKI67/TOP2A/CENPM/UBE2T/KIF4A/TRIP13/HMGB3/DIAPH3/CKS2/LMNB1/BUB1B/TK1/CHEK1/TCF19/AURKA/TACC3/E2F8/KPNA2/UBE2S/PCNA/CIT/ORC6/RACGAP1/CENPE/CCNB2/MAD2L1/EZH2/HMGA1/DSCC1/SMC4/CDKN2A/GINS4/MCM2/TIMELESS/MTHFD2/RNASEH2A/ATAD2/SPAG5/NCAPD2/PLK4/STMN1…	Enriched in Tumor
HALLMARK_G2M_CHECKPOINT	HALLMARK_G2M_CHECKPOINT	190	0.734771	3.53055	1e-10	4.16667e-10	1.57895e-10	1717	tags=41%, list=7%, signal=38%	MYBL2/UBE2C/TPX2/NEK2/CDK1/BIRC5/CENPA/TTK/AURKB/PBK/PLK1/BUB1/NDC80/ESPL1/EXO1/PTTG1/KIF2C/KIF15/NUSAP1/CDC45/HMMR/CDC20/E2F1/CDKN3/CDC25A/MKI67/TOP2A/TROAP/GINS2/CENPF/KIF4A/KIF11/E2F2/HMGB3/CKS2/LMNB1/POLQ/CHEK1/KIF23/CDC6/AURKA/TACC3/KPNA2/UBE2S/ORC6/RACGAP1/CENPE/CCNB2/PRC1/MAD2L1/STIL/EZH2/HMGA1/SMC4/CDC7/E2F3/CCNA2/MCM2/FBXO5/PLK4/RAD54L/SLC7A5/CCNF/TRAIP/STMN1/DDX39A/INCENP/UCK2/BRCA2/KIF…	Enriched in Tumor
HALLMARK_GLYCOLYSIS	HALLMARK_GLYCOLYSIS	197	0.429596	2.10494	1e-10	4.16667e-10	1.57895e-10	4497	tags=40%, list=18%, signal=33%	CDK1/DEPDC1/CENPA/KIF20A/HMMR/AURKA/EFNA3/TSTA3/PPFIA4/SDC1/SLC16A3/POLR3K/B3GNT3/SLC25A10/PKM/STMN1/TPI1/VEGFA/MIF/CHST2/ISG20/VCAN/SRD5A3/SLC37A4/BIK/B4GALT2/CHST1/ELF3/ENO1/ALDOA/PFKP/PGK1/AGRN/QSOX1/CLN6/CLDN3/LDHA/FKBP4/BPNT1/GALK1/B3GAT3/GLRX/MDH2/PPIA/FAM162A/LDHC/DSC2/EGLN3/CHST6/GALE/STC1/PMM2/PSMC4/DDIT4/G6PD/ARTN/CXCR4/GMPPB/IER3/PGLS/TGFBI/P4HA1/GOT1/NANP/AKR1A1/COPB2/NSDHL/CASP6/MDH1…	Enriched in Tumor
HALLMARK_INTERFERON_ALPHA_RESPONSE	HALLMARK_INTERFERON_ALPHA_RESPONSE	95	0.656431	2.884	1e-10	4.16667e-10	1.57895e-10	5091	tags=61%, list=21%, signal=49%	IFI30/CXCL10/OASL/CXCL11/ISG15/LAMP3/OAS1/IFI27/USP18/RSAD2/IFI44L/RTP4/BATF2/EPSTI1/CMPK2/LY6E/TRIM14/MX1/TAP1/IFI44/ISG20/UBE2L6/LAP3/IFIT3/PSMB9/NMI/IFIH1/PARP9/PARP14/PARP12/RIPK2/PSMB8/IFIT2/IFI35/PSME2/IFITM1/SELL/IRF9/HELZ2/CD74/PNPT1/ADAR/CD47/BST2/MOV10/RNF31/EIF2AK2/IL15/TRIM25/TRIM26/B2M/PSME1/PLSCR1/LGALS3BP/CMTR1/STAT2/GBP4/SAMD9	Enriched in Tumor
HALLMARK_INTERFERON_GAMMA_RESPONSE	HALLMARK_INTERFERON_GAMMA_RESPONSE	198	0.574433	2.82835	1e-10	4.16667e-10	1.57895e-10	4435	tags=49%, list=18%, signal=40%	IFI30/CXCL10/CXCL9/OASL/CXCL11/ISG15/ZBP1/IDO1/IFI27/USP18/OAS2/RSAD2/METTL7B/IFI44L/OAS3/RTP4/UPP1/IL2RB/BATF2/EPSTI1/MTHFD2/CMPK2/LY6E/TRIM14/PNP/STAT1/VAMP8/FCGR1A/MX1/CD86/TAP1/TNFAIP6/NLRC5/HLA-DQA1/IFI44/ISG20/CFB/UBE2L6/LAP3/MX2/IFIT3/IRF5/PSMB9/PTPN6/NMI/PFKP/SOCS1/IFIH1/ICAM1/DDX58/PARP14/PARP12/RIPK2/PSMB8/FPR1/IFIT2/PSMB10/IFI35/PSMB2/IFIT1/SECTM1/TAPBP/PSME2/GZMA/HLA-DMA/TNFAIP2/LCP2/…	Enriched in Tumor
HALLMARK_MITOTIC_SPINDLE	HALLMARK_MITOTIC_SPINDLE	197	0.555447	2.72158	1e-10	4.16667e-10	1.57895e-10	1154	tags=17%, list=5%, signal=16%	TPX2/NEK2/CDK1/BIRC5/ANLN/TTK/PLK1/BUB1/NDC80/ESPL1/DLGAP5/KIF2C/KIF15/NUSAP1/TOP2A/CENPF/KIF4A/KIF11/PIF1/LMNB1/KIF23/ECT2/AURKA/SAC3D1/RACGAP1/CENPE/CCNB2/PRC1/SMC4/FBXO5/INCENP/BRCA2/KIF20B	Enriched in Tumor
HALLMARK_MTORC1_SIGNALING	HALLMARK_MTORC1_SIGNALING	195	0.649753	3.17162	1e-10	4.16667e-10	1.57895e-10	4856	tags=61%, list=20%, signal=49%	IFI30/RRM2/PLK1/BUB1/CDC25A/TRIB3/AURKA/BCAT1/SLC2A1/SDF2L1/PSAT1/TOMM40/GAPDH/SLC7A11/MCM2/MTHFD2/SLC7A5/PNP/CCNF/EBP/MCM4/DDX39A/NFKBIB/TPI1/PSPH/DHCR24/SLC37A4/SQLE/DHCR7/PSMD14/ARPC5L/HSPE1/SRD5A1/FKBP2/ITGB2/ENO1/PDK1/PRDX1/STIP1/DAPP1/ALDOA/EEF1E1/ELOVL6/PGK1/MLLT11/CD9/YKT6/LDHA/POLR3G/PIK3R3/GPI/SCD/GMPS/CACYBP/GLRX/PPIA/RPN1/CORO1A/ACTR3/HPRT1/PPA1/EGLN3/HMBS/ACTR2/STC1/PNO1/PSMA4/SORD/D…	Enriched in Tumor
HALLMARK_MYC_TARGETS_V1	HALLMARK_MYC_TARGETS_V1	194	0.646745	3.13637	1e-10	4.16667e-10	1.57895e-10	7600	tags=78%, list=31%, signal=55%	CDC45/CDC20/KPNA2/PCNA/TYMS/MAD2L1/CCNA2/MCM2/CSTF2/NME1/LSM2/MCM4/HDGF/POLE3/PSMD14/RFC4/HSPE1/CYC1/PRDX4/STARD7/VBP1/RAN/SNRPD1/SRPK1/PGK1/CCT3/SRSF2/LDHA/CBX3/SNRPA1/PSMA7/COX5A/CAD/PSMB2/MCM6/PPIA/MCM5/PSMA6/CTPS1/HPRT1/PABPC1/RANBP1/NOP56/MRPL9/NOLC1/CCT2/USP1/NCBP2/ILF2/MCM7/PSMA4/SRM/SNRPG/PSMC4/TFDP1/XPOT/CDK2/DEK/SET/SSBP1/PSMD8/PHB/PRPS2/LSM7/RPLP0/DDX21/HDAC2/NDUFAB1/TXNL4A/GSPT1/PPM1G…	Enriched in Tumor
HALLMARK_MYC_TARGETS_V2	HALLMARK_MYC_TARGETS_V2	58	0.672873	2.71184	1e-10	4.16667e-10	1.57895e-10	6026	tags=71%, list=24%, signal=54%	PLK1/EXOSC5/PLK4/MCM4/SLC29A2/IPO4/HSPE1/DCTPP1/CBX3/NOP2/MCM5/NOP56/FARSA/NOLC1/PUS1/SORD/SRM/PHB/TBRG4/PPRC1/SLC19A1/TMEM97/WDR43/DUSP2/PPAN/RABEPK/UNG/PES1/MRTO4/AIMP2/HK2/WDR74/HSPD1/NDUFAF4/TCOF1/RRP12/PA2G4/IMP4/MPHOSPH10/TFB2M/DDX18	Enriched in Tumor
HALLMARK_OXIDATIVE_PHOSPHORYLATION	HALLMARK_OXIDATIVE_PHOSPHORYLATION	184	0.478942	2.30867	1e-10	4.16667e-10	1.57895e-10	6599	tags=51%, list=27%, signal=37%	TIMM10/COX8A/COX6C/TIMM8B/TIMM17A/SLC25A5/BAX/MRPS12/TOMM22/ATP6V0B/ATP6V1C1/NDUFA7/MRPL34/CYC1/MRPL15/ATP6V0C/NDUFA9/LDHA/COX6A1/GPI/COX5A/UQCRH/HCCS/COX7A2L/IDH2/MDH2/NDUFB2/UQCRQ/TIMM50/ATP6AP1/COX5B/ATP6V1F/COX7B/UQCRFS1/VDAC2/MRPL11/MTX2/COX6B1/NDUFA1/ALAS1/NDUFB7/NDUFC2/NDUFS8/TCIRG1/NDUFAB1/NDUFB3/NDUFB6/FH/UQCR10/LDHB/VDAC1/NDUFB5/HSD17B10/IMMT/MDH1/COX7A2/PRDX3/ACAA1/NNT/MRPS22/NDUFS3/AI…	Enriched in Tumor
HALLMARK_UNFOLDED_PROTEIN_RESPONSE	HALLMARK_UNFOLDED_PROTEIN_RESPONSE	106	0.523281	2.33096	2.09056e-10	8.04063e-10	3.04697e-10	6553	tags=53%, list=27%, signal=39%	EXOSC4/EXOSC5/PSAT1/MTHFD2/SLC7A5/LSM4/VEGFA/CHAC1/CEBPG/YWHAZ/FKBP14/SRPRB/HYOU1/LSM1/EIF4EBP1/PDIA6/IFIT1/BANF1/YIF1A/NOP56/NOLC1/DKC1/CKS1B/NFYA/EIF4A3/EIF4G1/XPOT/DDIT4/PDIA5/ALDH18A1/PREB/SERP1/SSR1/HSPA5/NABP1/PAIP1/SLC1A4/SEC11A/HSP90B1/EIF2S1/NHP2/EIF4A1/ASNS/CALR/ARFGAP1/NOP14/EDEM1/WIPI1/POP4/KHSRP/HSPA9/CCL2/CEBPB/EXOC2/STC2/KIF5B	Enriched in Tumor
HALLMARK_INFLAMMATORY_RESPONSE	HALLMARK_INFLAMMATORY_RESPONSE	192	0.404595	1.96412	7.9779e-09	2.84925e-08	1.07972e-08	3645	tags=30%, list=15%, signal=26%	CXCL10/CXCL9/CXCL11/CLEC5A/LAMP3/OLR1/INHBA/IL1A/TNFRSF9/CCL20/RTP4/IL2RB/RGS16/IL1B/MSR1/GNA15/LY6E/IL10/LCK/PIK3R5/TNFAIP6/NOD2/CHST2/OSM/ICAM4/P2RY2/SERPINE1/GPR132/NMI/HPN/ICAM1/PLAUR/PTAFR/ADRM1/TNFSF15/RIPK2/SPHK1/FPR1/TAPBP/CD70/IFITM1/CD48/TIMP1/CSF3R/LCP2/CXCL6/SLC7A1/LIF/ROS1/LYN/SELL/LTA/MEFV/CD82/CCL5/MMP14/IRAK2/IL18	Enriched in Tumor
HALLMARK_MYOGENESIS	HALLMARK_MYOGENESIS	194	-0.502728	-1.76052	2.33405e-07	7.78018e-07	2.94828e-07	5445	tags=39%, list=22%, signal=31%	LSP1/RYR1/GPX3/AK1/SH3BGR/CAV3/FABP3/COL6A2/TCAP/BIN1/MAPRE3/MEF2C/MYH3/MYL2/SVIL/SORBS3/MYL1/CDKN1A/TPM2/CRYAB/FST/NOS1/EFS/SPEG/SMTN/GSN/CKB/COL15A1/ACTN3/HSPB8/PGAM2/NCAM1/DTNA/PYGM/CDH13/PKIA/TAGLN/GNAO1/COX7A1/HSPB2/MYLK/KCNH1/ITGA7/IGF1/PPP1R3C/PTGIS/ACTN2/ACTC1/CACNA1H/SGCG/SORBS1/MYH7/SGCA/MYH8/REEP1/MYH4/FGF2/HRC/LAMA2/MYL3/MYH1/MYH2/MYOM1/SOD3/DMD/FHL1/CD36/LDB3/MYOM2/FXYD1/CFD/APOD/TNN…	Enriched in Normal
HALLMARK_PI3K_AKT_MTOR_SIGNALING	HALLMARK_PI3K_AKT_MTOR_SIGNALING	100	0.435759	1.91294	7.68131e-06	2.40041e-05	9.09629e-06	5033	tags=43%, list=20%, signal=34%	CDK1/E2F1/TRIB3/SLC2A1/SFN/LCK/NFKBIB/PPP1CA/CFL1/PDK1/DAPP1/PIK3R3/IL2RG/TRAF2/ACTR3/RPS6KA1/AKT1/CSNK2B/TIAM1/MYD88/ACTR2/ARHGDIA/ARPC3/GSK3B/YWHAB/ARF1/CDK2/CXCR4/PFN1/VAV3/AP2M1/FASLG/CLTC/AKT1S1/PLA2G12A/RIT1/GRB2/SLA/HSP90B1/CALR/NCK1/STAT2/TBK1	Enriched in Tumor
HALLMARK_ESTROGEN_RESPONSE_LATE	HALLMARK_ESTROGEN_RESPONSE_LATE	196	0.321251	1.57165	7.35451e-05	0.000207853	7.87654e-05	2805	tags=29%, list=11%, signal=26%	KIF20A/CDC20/TOP2A/GINS2/S100A9/NMU/CDC6/GAL/STIL/TSTA3/SFN/PPIF/RNASEH2A/PLK4/CA2/SLC7A5/NXT1/BATF/CLIC3/COX6C/PKP3/GJB3/MAPK13/ISG20/TFAP2C/ST14/CCNA1/DHCR7/OPN3/SNX10/LLGL2/PERP/PTPN6/SERPINA1/CYP4F11/FGFR3/CD9/KLK10/LSR/FKBP4/MDK/KCNK5/CELSR2/IDH2/ASS1/SLC16A1/ALDH3B1/HPRT1/FABP5/TIAM1/GALE/KRT19/IMPA2/SERPINA3/SORD/FRK	Enriched in Tumor
HALLMARK_P53_PATHWAY	HALLMARK_P53_PATHWAY	190	0.323217	1.55305	7.48271e-05	0.000207853	7.87654e-05	4867	tags=31%, list=20%, signal=25%	IFI30/IL1A/TRIB3/TRIAP1/PCNA/VDR/RHBDF2/UPP1/KLK8/RGS16/SFN/CDKN2A/SDC1/IRAK1/SLC7A11/BAK1/RAP2B/ZNF365/VAMP8/NUDT15/TAP1/ST14/BAX/HMOX1/DEF6/PERP/SOCS1/CTSD/CDKN2B/SPHK1/FAM162A/SEC61A1/GADD45A/LIF/RNF19B/DDIT4/SAT1/S100A4/SLC3A2/PVT1/CD82/IER3/TNNI1/TM7SF3/LDHB/ABCC5/CYFIP2/RAB40C/TPD52L1/RPS12/MAPKAPK3/RAD9A/SERTAD3/WRAP73/TAX1BP3/HINT1/TM4SF1/EPS8L2/PMM1	Enriched in Tumor
HALLMARK_TNFA_SIGNALING_VIA_NFKB	HALLMARK_TNFA_SIGNALING_VIA_NFKB	196	0.315601	1.54401	0.00013212	0.000347684	0.000131754	2088	tags=18%, list=8%, signal=17%	CXCL10/CXCL11/OLR1/INHBA/IL1A/SLC2A6/TNFRSF9/BCL2A1/CCL20/PLAU/KYNU/CD80/IL1B/TNF/FJX1/NFKBIE/YRDC/PHLDA2/TAP1/TNFAIP6/VEGFA/PLEK/SERPINB8/F2RL1/SERPINE1/BCL3/IFIH1/RELB/ICAM1/PLAUR/CD83/TNIP2/DDX58/RIPK2/SPHK1/IFIT2	Enriched in Tumor
HALLMARK_UV_RESPONSE_UP	HALLMARK_UV_RESPONSE_UP	152	0.314456	1.49626	0.000793171	0.00198293	0.000751425	3522	tags=34%, list=14%, signal=30%	CCNE1/CHRNA5/CTSV/FEN1/GAL/GGH/NPTX2/PPIF/BAK1/FGF18/CA2/EPCAM/TAP1/POLE3/CEBPG/HMOX1/SLC6A12/RFC4/ATP6V1C1/MAPK8IP2/PPAT/STIP1/ALDOA/E2F5/ICAM1/YKT6/CDKN2B/NPTXR/FKBP4/GRINA/POLR2H/RPN1/CDC34/AP2S1/ATP6V1F/MARK2/IGFBP2/DNAJA1/FURIN/LYN/PDAP1/TFRC/WIZ/BCL2L11/CDK2/AGO2/TGFBRAP1/TUBA4A/ALAS1/DDX21/TMBIM6/MMP14	Enriched in Tumor
HALLMARK_IL6_JAK_STAT3_SIGNALING	HALLMARK_IL6_JAK_STAT3_SIGNALING	85	0.375195	1.62487	0.000879624	0.00209434	0.000793646	1925	tags=21%, list=8%, signal=20%	CXCL10/CXCL9/CXCL11/CXCL13/TNFRSF12A/IL1B/CCR1/IL12RB1/TNF/BAK1/STAT1/PIK3R5/IL9R/HMOX1/LTB/SOCS1/CD9/IL2RG	Enriched in Tumor
HALLMARK_KRAS_SIGNALING_DN	HALLMARK_KRAS_SIGNALING_DN	184	-0.418302	-1.46383	0.00192145	0.00436694	0.00165484	5233	tags=34%, list=21%, signal=27%	SLC6A3/NPY4R/BTG2/EDN1/SPRR3/PAX4/TCF7L1/AMBN/RYR2/UGT2B17/CYP39A1/P2RY4/SHOX2/C5/GAMT/MYO15A/NOS1/PCDHB1/KLHDC8A/EFHD1/NTF3/TEX15/COL2A1/HNF1A/KRT15/CACNA1F/PRODH/KRT5/CYP11B2/CDH16/THRB/CLDN8/NR4A2/SOX10/EPHA5/ITIH3/NUDT11/KCNQ2/P2RX6/ABCB11/IL5/SCN10A/CPA2/ACTC1/TENM2/GRID2/SLC16A7/TSHB/KRT1/DCC/PAX3/EGF/KCNMB1/MYH7/KRT13/IRS4/SERPINA10/CPB1/GP2/CNTFR/TFAP2B/PTGFR/ZBTB16	Enriched in Normal
HALLMARK_IL2_STAT5_SIGNALING	HALLMARK_IL2_STAT5_SIGNALING	193	0.276	1.33999	0.00479344	0.010135	0.00384063	3592	tags=26%, list=15%, signal=22%	CXCL10/SPP1/CCNE1/CDC6/TNFRSF18/TNFRSF9/TNFRSF4/IL2RB/RGS16/CDCP1/ETV4/CA2/IL10/PNP/APLP1/BATF/CTLA4/CD86/CAPG/UCK2/SLC29A2/S100A1/SYT11/LTB/SOCS1/PRAF2/CD83/GPR65/MUC1/NOP2/CCR4/IKZF2/CD48/CST7/PDCD2L/TIAM1/TLR7/LIF/CTSZ/NCS1/PUS1/FURIN/SELL/IL2RA/AHCY/SYNGR2/GSTO1/P4HA1/SLC1A5/ODC1	Enriched in Tumor
HALLMARK_UV_RESPONSE_DN	HALLMARK_UV_RESPONSE_DN	138	-0.42611	-1.46108	0.0048648	0.010135	0.00384063	6278	tags=36%, list=25%, signal=27%	ADORA2B/YTHDC1/NR3C1/GRK5/KALRN/MET/FYN/LTBP1/CELF2/MGLL/PLCB4/VLDLR/NRP1/SDC2/PMP22/TGFBR2/PTPN21/SMAD3/PTPRM/CAP2/PDGFRB/NFIB/LPAR1/AKT3/ID1/INPP4B/KCNMA1/CITED2/DUSP1/SNAI2/CDON/IGFBP5/PRKAR2B/DLC1/IRS1/AMPH/EFEMP1/MAGI2/F3/RBPMS/FBLN5/SYNE1/PPARG/TGFBR3/CAV1/CACNA1A/TFPI/MMP16/KIT/PTGFR	Enriched in Normal
HALLMARK_REACTIVE_OXYGEN_SPECIES_PATHWAY	HALLMARK_REACTIVE_OXYGEN_SPECIES_PATHWAY	47	0.445202	1.7271	0.00678158	0.0135632	0.00513972	7481	tags=55%, list=30%, signal=39%	SRXN1/CDKN2D/GLRX2/PRDX4/PRDX1/PFKP/GLRX/NQO1/ABCC1/G6PD/ATOX1/SBNO2/LAMTOR5/FTL/TXN/OXSR1/NDUFS2/PRDX2/TXNRD1/ERCC2/HMOX2/NDUFB4/IPCEF1/GSR/PRDX6/SOD2	Enriched in Tumor
HALLMARK_XENOBIOTIC_METABOLISM	HALLMARK_XENOBIOTIC_METABOLISM	193	-0.389383	-1.36397	0.0117332	0.0225638	0.00855051	4272	tags=24%, list=17%, signal=20%	ALDH2/FABP1/GSTM4/CYP26A1/TTPA/CYP2C18/ARG1/ESR1/HSD11B1/IGFBP4/FETUB/ABHD6/ALDH3A1/HRG/UPB1/PROS1/HSD17B2/AKR1C3/ACOX2/FBLN1/CYP17A1/G6PC/IGF1/AKR1C2/FMO1/PTGDS/HNF4A/FMO3/NDRG2/REG1A/MPP2/ABCD2/PLG/AOX1/PDK4/ACSM1/F10/RBP4/ATOH8/SERPINA6/CD36/MAOA/CDO1/CES1/GSTA3/TAT/ADH1C	Enriched in Normal
HALLMARK_COMPLEMENT	HALLMARK_COMPLEMENT	196	0.261197	1.27785	0.0126758	0.0234737	0.00889531	4447	tags=29%, list=18%, signal=24%	OLR1/S100A9/CTSV/APOC1/RABIF/KYNU/FCER1G/PLA2G7/GZMB/CP/CA2/C2/LCK/PIK3R5/FN1/TMPRSS6/PLEK/CFB/DYRK2/LAP3/SERPINE1/PSMB9/CTSB/SERPINA1/MMP15/PLAUR/PPP4C/CTSD/CTSS/MMP13/SIRT6/GZMA/MSRB1/TIMP1/LCP2/LYN/RCE1/MMP12/SPOCK2/ATOX1/PFN1/WAS/CCL5/MMP14/GPD2/GCA/S100A13/C1QC/CTSC/GNB2/C1QA/HSPA5/DUSP5/GRB2/CASP3/USP14/CTSL	Enriched in Tumor
HALLMARK_BILE_ACID_METABOLISM	HALLMARK_BILE_ACID_METABOLISM	110	-0.425279	-1.43212	0.0150361	0.0268502	0.0101748	5488	tags=30%, list=22%, signal=23%	HSD17B11/HSD3B1/SULT1B1/HAO1/NUDT12/NR1I2/CAT/CH25H/CYP8B1/EFHC1/CYP7B1/TTR/EPHX2/SLC27A2/CYP39A1/ABCA5/CYP7A1/BMP6/RXRG/GC/LIPE/SLC23A1/SOAT2/NR3C2/AKR1D1/NR1H4/AR/ABCD2/ABCA6/ALDH1A1/SERPINA6/ABCA9/ABCA8	Enriched in Normal
HALLMARK_APOPTOSIS	HALLMARK_APOPTOSIS	157	0.26155	1.27989	0.0254644	0.0439042	0.0166374	4689	tags=31%, list=19%, signal=25%	TOP2A/IL1A/TNFRSF12A/PMAIP1/IL1B/TSPO/TNF/GNA15/EBP/TAP1/ISG20/BIK/BAX/CCNA1/HMOX1/SLC20A1/BGN/DAP3/KRT18/LEF1/TIMP1/GADD45A/DNAJA1/VDAC2/ERBB3/BRCA1/SAT1/BCL2L11/CDK2/DFFA/PTK2/IER3/SMAD7/FASLG/PAK1/IL18/CASP6/GPX1/PSEN2/PPT1/BCAP31/CASP3/ENO2/PLCB2/CDC25B/CD2/PEA15/BID/HMGB2	Enriched in Tumor
HALLMARK_SPERMATOGENESIS	HALLMARK_SPERMATOGENESIS	121	0.277729	1.27315	0.0272309	0.0453849	0.0171985	1309	tags=13%, list=5%, signal=13%	NEK2/CDK1/NCAPH/TTK/BUB1/KIF2C/CDKN3/AURKA/SLC2A5/CCNB2/EZH2/CCNA1/ACRV1/RFC4/RPL39L/PCSK1N	Enriched in Tumor

## Sheet: Breast_TumorVsNormal_GSEA
ID	Description	setSize	enrichmentScore	NES	pvalue	p.adjust	qvalues	rank	leading_edge	core_enrichment	Phenotype
HALLMARK_DNA_REPAIR	HALLMARK_DNA_REPAIR	148	0.505438	2.35853	1e-10	6.25e-10	2.63158e-10	6552	tags=48%, list=27%, signal=35%	SAC3D1/FEN1/PCNA/ZWINT/RPA3/TYMS/BOLA2/CMPK2/NME1/RFC4/TAF13/ALYREF/NME3/ZNF707/RFC2/HPRT1/POLR2H/PNP/RALA/ADRM1/RAD51/POLR2F/STX3/POLR2I/ARL6IP1/GUK1/VPS37D/NCBP2/POLR2K/CLP1/POLA2/TAF6/SEC61A1/RRM2B/POLH/CANT1/RFC3/SSRP1/ZNRD1/COX17/POLD3/RAE1/RBX1/RNMT/SUPT4H1/POLD1/MPC2/NELFE/PRIM1/NELFCD/BCAP31/TMED2/SUPT5H/RFC5/CETN2/POLR2G/AK1/DDB1/POLR2J/SF3A3/DGUOK/CSTF3/POLR2D/POLR3C/DGCR8/NT5C/ADA/ERCC…	Enriched in Tumor
HALLMARK_E2F_TARGETS	HALLMARK_E2F_TARGETS	195	0.765748	3.70493	1e-10	6.25e-10	2.63158e-10	4184	tags=66%, list=17%, signal=55%	CDK1/MELK/RRM2/CDCA8/MYBL2/KIF2C/KIF18B/KIF4A/BIRC5/RAD51AP1/DEPDC1/PLK1/PTTG1/CDKN3/DLGAP5/AURKB/UBE2T/E2F8/TOP2A/CDC20/SPC25/HMGB3/GINS1/ESPL1/CCNE1/MKI67/TRIP13/CKS2/SPC24/CDC25A/CDCA3/ASF1B/HMMR/LMNB1/TCF19/CENPM/DIAPH3/TK1/PCNA/KPNA2/AURKA/MAD2L1/UBE2S/DSCC1/TACC3/RNASEH2A/CHEK1/EZH2/RPA3/CENPE/ORC6/STMN1/BUB1B/RAD1/SMC4/CTPS1/ATAD2/RACGAP1/HMGA1/SPAG5/CCNB2/NCAPD2/MTHFD2/POP7/PLK4/ANP32E/CI…	Enriched in Tumor
HALLMARK_G2M_CHECKPOINT	HALLMARK_G2M_CHECKPOINT	190	0.735582	3.53097	1e-10	6.25e-10	2.63158e-10	2796	tags=51%, list=11%, signal=46%	CDK1/NEK2/UBE2C/TPX2/BUB1/NDC80/KIF15/MYBL2/KIF2C/CENPA/KIF4A/BIRC5/PLK1/PBK/TTK/PTTG1/CDKN3/AURKB/NUSAP1/TOP2A/CDC20/CENPF/CDC45/HMGB3/ESPL1/MKI67/CKS2/EXO1/CDC25A/HMMR/TROAP/GINS2/LMNB1/E2F2/KPNA2/AURKA/CDC6/MAD2L1/UBE2S/KIF11/CCNA2/E2F1/SLC7A5/TACC3/KIF23/FBXO5/CDC7/CHEK1/EZH2/POLQ/CENPE/ORC6/PRC1/STMN1/SMC4/STIL/E2F3/RACGAP1/HMGA1/CCNB2/INCENP/BCL3/CCNF/PLK4/RAD54L/SQLE/MCM2/SAP30/SMC2/DDX39A…	Enriched in Tumor
HALLMARK_GLYCOLYSIS	HALLMARK_GLYCOLYSIS	197	0.446663	2.16363	1e-10	6.25e-10	2.63158e-10	4213	tags=38%, list=17%, signal=32%	CDK1/CENPA/DEPDC1/KIF20A/HMMR/AURKA/PPFIA4/STMN1/EFNA3/SLC16A3/SLC25A10/TSTA3/POLR3K/CHST6/CHST1/ISG20/VEGFA/SDC1/GLRX/TPI1/PKM/MIF/BPNT1/SAP30/GMPPB/B4GALT2/LDHC/PFKP/FKBP4/P4HA1/QSOX1/ENO2/PSMC4/LDHA/GALK1/HSPA5/PPIA/STC1/PGK1/CD44/B4GALT4/CXCR4/TXN/SLC37A4/PGM2/CLN6/DSC2/EGLN3/NANP/ELF3/NASP/FAM162A/GALE/VCAN/ALDOA/COPB2/SRD5A3/TPBG/MDH2/PMM2/GFPT1/PLOD1/GOT2/HAX1/LHPP/B3GAT3/NSDHL/ENO1/G6PD/S…	Enriched in Tumor
HALLMARK_INTERFERON_GAMMA_RESPONSE	HALLMARK_INTERFERON_GAMMA_RESPONSE	198	0.461633	2.22517	1e-10	6.25e-10	2.63158e-10	4574	tags=36%, list=19%, signal=30%	CXCL10/CXCL9/IFI30/CXCL11/ISG15/IDO1/OASL/RSAD2/IFI27/OAS2/USP18/GZMA/CMPK2/CD86/FCGR1A/MTHFD2/ZBP1/ISG20/RTP4/UPP1/IFI44L/STAT1/TNFAIP6/TAP1/PFKP/VAMP8/OAS3/NLRC5/CCL5/MX1/EPSTI1/NMI/IFIH1/IFI44/IL2RB/IRF5/PNP/BATF2/DDX58/LAP3/RIPK2/PSMB9/LY6E/PTPN6/PSMB10/HLA-DQA1/TRIM14/IFIT2/PSMB2/FPR1/ST8SIA4/IFIT3/TAPBP/IFNAR2/ADAR/CASP3/NUP93/ICAM1/IL18BP/EIF2AK2/PNPT1/LCP2/CD38/UBE2L6/IFI35/HLA-A/PTPN1/MY…	Enriched in Tumor
HALLMARK_MITOTIC_SPINDLE	HALLMARK_MITOTIC_SPINDLE	197	0.600175	2.90724	1e-10	6.25e-10	2.63158e-10	3762	tags=31%, list=15%, signal=26%	CDK1/NEK2/TPX2/ANLN/BUB1/NDC80/KIF15/KIF2C/KIF4A/BIRC5/PLK1/TTK/DLGAP5/PIF1/NUSAP1/TOP2A/CENPF/ESPL1/SAC3D1/LMNB1/AURKA/ECT2/KIF11/KIF23/FBXO5/CENPE/PRC1/SMC4/RACGAP1/CCNB2/INCENP/KIF20B/KATNB1/BRCA2/RHOF/FSCN1/CKAP5/KPTN/TUBA4A/TUBD1/EZR/CEP72/MID1IP1/KIF3C/KNTC1/MAP1S/ARHGDIA/TIAM1/NCK2/RANBP9/SASS6/ARHGEF11/ARL8A/KIF5B/CEP250/STK38L/SMC1A/CLIP2/MYO9B/RALBP1/CD2AP	Enriched in Tumor
HALLMARK_MTORC1_SIGNALING	HALLMARK_MTORC1_SIGNALING	195	0.640164	3.09732	1e-10	6.25e-10	2.63158e-10	4460	tags=54%, list=18%, signal=44%	RRM2/BUB1/PLK1/IFI30/CDC25A/SLC7A11/AURKA/SLC2A1/PSPH/SLC7A5/FADS2/TOMM40/TRIB3/PSAT1/MTHFD2/CACYBP/SDF2L1/STARD4/CCNF/NFKBIB/STIP1/GAPDH/DHCR7/GLRX/EBP/SQLE/MCM4/BCAT1/TPI1/MCM2/SRD5A1/POLR3G/MLLT11/DDX39A/PSMD14/ARPC5L/PRDX1/TFRC/PIK3R3/P4HA1/HSPE1/YKT6/FKBP2/DAPP1/CALR/HPRT1/GMPS/CD9/PSMC4/PNP/TUBA4A/UCHL5/TMEM97/PSMD12/LDHA/GSK3B/HSPA5/PPIA/STC1/ACTR3/PGK1/PNO1/PDK1/CXCR4/SLC37A4/IDI1/RIT1/RP…	Enriched in Tumor
HALLMARK_MYC_TARGETS_V1	HALLMARK_MYC_TARGETS_V1	194	0.628008	3.04391	1e-10	6.25e-10	2.63158e-10	6573	tags=65%, list=27%, signal=48%	CDC20/CDC45/PCNA/KPNA2/MAD2L1/CCNA2/TYMS/CTPS1/POLE3/LSM2/HDGF/SRPK1/CSTF2/MCM4/PRPS2/NME1/SNRPG/MCM2/RFC4/LSM7/DEK/USP1/SNRPD1/PSMD14/CCT3/RAN/STARD7/HSPE1/PRDX4/HPRT1/MCM6/HDAC2/PSMC4/NOLC1/CBX3/SNRPA1/RANBP1/SRSF2/MCM5/GSPT1/LDHA/SERBP1/PPIA/PGK1/MRPL9/PSMA7/SET/CDK2/NCBP2/TFDP1/PPM1G/BUB3/CAD/CCT2/PSMA4/DDX21/PSMB2/VBP1/ILF2/EIF2S2/PABPC1/NDUFAB1/SNRPD3/MCM7/PSMA6/NOP56/PSMD8/CYC1/PSMD1/EIF3B…	Enriched in Tumor
HALLMARK_INTERFERON_ALPHA_RESPONSE	HALLMARK_INTERFERON_ALPHA_RESPONSE	95	0.548881	2.42037	2.3826e-10	1.32367e-09	5.57334e-10	2951	tags=31%, list=12%, signal=27%	CXCL10/IFI30/LAMP3/CXCL11/ISG15/OASL/OAS1/RSAD2/IFI27/USP18/CMPK2/ISG20/RTP4/IFI44L/TAP1/SELL/MX1/EPSTI1/NMI/IFIH1/IFI44/BATF2/LAP3/RIPK2/PSMB9/LY6E/TRIM14/IFIT2/IFIT3	Enriched in Tumor
HALLMARK_UNFOLDED_PROTEIN_RESPONSE	HALLMARK_UNFOLDED_PROTEIN_RESPONSE	106	0.514425	2.3072	4.89536e-10	2.44768e-09	1.0306e-09	6750	tags=53%, list=27%, signal=39%	EXOSC4/SLC7A5/CEBPG/PSAT1/MTHFD2/LSM4/CHAC1/EXOSC5/VEGFA/YWHAZ/SRPRB/PDIA6/LSM1/NFYA/FKBP14/HYOU1/CALR/DKC1/NOLC1/BANF1/HSPA5/YIF1A/PAIP1/CKS1B/EIF4A3/SLC1A4/PREB/ASNS/EIF4G1/KIF5B/NOP56/HSP90B1/BAG3/SERP1/KDELR3/ALDH18A1/EIF4EBP1/XPOT/DNAJA4/EIF2S1/ARFGAP1/SSR1/WIPI1/KHSRP/EDEM1/EXOSC2/DNAJC3/ZBTB17/NABP1/HSPA9/NOP14/CEBPB/IFIT1/TATDN2/CCL2/PDIA5	Enriched in Tumor
HALLMARK_MYC_TARGETS_V2	HALLMARK_MYC_TARGETS_V2	58	0.628	2.48365	1.25323e-09	5.69652e-09	2.39854e-09	6928	tags=67%, list=28%, signal=48%	PLK1/PLK4/EXOSC5/MCM4/IPO4/HSPE1/PPAN/NOP2/NOLC1/CBX3/TMEM97/MCM5/DCTPP1/SLC29A2/SLC19A1/FARSA/NOP56/PPRC1/PES1/WDR43/PUS1/AIMP2/HSPD1/MPHOSPH10/TBRG4/NIP7/SORD/WDR74/PRMT3/SRM/NDUFAF4/DDX18/LAS1L/TFB2M/TCOF1/HK2/MRTO4/RABEPK/UNG	Enriched in Tumor
HALLMARK_ALLOGRAFT_REJECTION	HALLMARK_ALLOGRAFT_REJECTION	186	0.412665	1.98223	2.49905e-09	1.04127e-08	4.38429e-09	4906	tags=37%, list=20%, signal=30%	INHBA/CXCL9/MMP9/IL1B/GZMA/CD86/BCL3/CD80/HLA-DMB/CXCL13/HLA-DOB/LY75/BCAT1/NME1/STAT1/CDKN2A/TAP1/TIMP1/CCL5/CAPG/CD3D/IL2RB/GPR65/LCK/IL27RA/LY86/CCR1/FGR/LTB/IL12RB1/RIPK2/PTPN6/KLRD1/TPD52/PSMB10/HLA-DQA1/ITGB2/CSK/LYN/TRAF2/LIF/ST8SIA4/CCL11/HLA-DOA/CTSS/GALNT1/TAPBP/IFNAR2/PRKCB/IL2RA/EIF5A/ICAM1/GZMB/ELF4/UBE2D1/CRTAM/GCNT1/LCP2/TGFB1/IGSF6/CD3G/MRPL3/HLA-A/EIF3A/MTIF2/NCK1/CD1D/CD47/AKT1	Enriched in Tumor
HALLMARK_OXIDATIVE_PHOSPHORYLATION	HALLMARK_OXIDATIVE_PHOSPHORYLATION	184	0.403196	1.92961	2.47266e-08	9.51024e-08	4.00431e-08	8183	tags=58%, list=33%, signal=39%	TOMM22/COX6C/COX8A/TIMM17A/ATP6V0C/TIMM10/ATP6V0B/NDUFA7/MRPL34/NDUFA9/MRPL15/BAX/SLC25A5/HCCS/LDHA/POLR2F/ATP6V1C1/FH/TIMM8B/NDUFB2/NDUFS2/GPI/IDH2/BCKDHA/UQCRH/ATP6AP1/ATP6V1F/COX7A2L/COX6A1/NDUFAB1/TIMM50/HSD17B10/MDH2/NDUFA1/CYC1/CYCS/ALAS1/IMMT/GOT2/COX17/MRPS12/UQCRFS1/AFG3L2/MRPS22/NDUFB3/VDAC3/NDUFS3/NDUFS6/COX7B/NNT/VDAC1/TCIRG1/COX5A/NDUFA8/VDAC2/OPA1/ATP1B1/MTX2/AIFM1/COX6B1/UQCR10/MRP…	Enriched in Tumor
HALLMARK_XENOBIOTIC_METABOLISM	HALLMARK_XENOBIOTIC_METABOLISM	193	-0.472253	-1.67281	5.78632e-06	2.06654e-05	8.70123e-06	3781	tags=25%, list=15%, signal=21%	MAN1A1/CYP2C18/ABHD6/ITIH1/GSTM4/HSD11B1/IGFBP4/FBLN1/ENPEP/FBP1/ARG1/CYP1A1/PROS1/AKR1C2/CYP4F2/AKR1C3/NDRG2/HNF4A/ALDH2/FABP1/CYP26A1/PLG/SERPINA6/AOX1/FMO3/PTGDS/HSD17B2/F10/CYP17A1/FMO1/ACOX2/GSTA3/REG1A/G6PC/ESR1/ABCD2/ATOH8/MPP2/CDO1/IGF1/ACSM1/CES1/PDK4/MAOA/CD36/RBP4/ADH1C/TAT	Enriched in Normal
HALLMARK_MYOGENESIS	HALLMARK_MYOGENESIS	194	-0.477301	-1.69032	9.65839e-06	3.21946e-05	1.35556e-05	3536	tags=32%, list=14%, signal=28%	LSP1/MYL1/MYBPC3/PYGM/NAV2/ABLIM1/FST/SGCD/SORBS3/MYF6/VIPR1/STC2/TAGLN/ACSL1/CACNA1H/KCNH1/CAV3/PKIA/TNNI2/PPP1R3C/SSPN/MYLK/COL15A1/ACTN2/RYR1/GSN/MYH3/MYL2/ACTC1/PTGIS/FGF2/COX7A1/HRC/SORBS1/SGCA/DMD/MYOM1/GPX3/LAMA2/SPDEF/HSPB2/MYL3/ITGA7/SOD3/MYH11/MYOM2/MYH7/IGF1/LDB3/FHL1/MYH8/MYH1/CASQ2/MYH2/APOD/MYH4/SGCG/TNNT3/FXYD1/DES/CD36/CFD	Enriched in Normal
HALLMARK_PI3K_AKT_MTOR_SIGNALING	HALLMARK_PI3K_AKT_MTOR_SIGNALING	100	0.412363	1.85303	3.06055e-05	9.56422e-05	4.02704e-05	4909	tags=37%, list=20%, signal=30%	CDK1/SLC2A1/E2F1/TRIB3/NFKBIB/SFN/PIK3R3/DAPP1/CALR/LCK/PPP1CA/CFL1/GSK3B/ARF1/ACTR3/CDK2/PDK1/RPS6KA1/CXCR4/RIT1/TRAF2/ARHGDIA/TIAM1/ACTR2/PFN1/PRKCB/AP2M1/CLTC/HSP90B1/YWHAB/PLA2G12A/CSNK2B/GRB2/MYD88/NCK1/AKT1/ARPC3	Enriched in Tumor
HALLMARK_ADIPOGENESIS	HALLMARK_ADIPOGENESIS	190	-0.446076	-1.57704	0.000232056	0.000682518	0.000287376	2925	tags=16%, list=12%, signal=14%	CMBL/SSPN/MYLK/CD302/COL15A1/ANGPT1/FZD4/ALDH2/MGLL/SORBS1/SPARCL1/SNCG/ENPP2/GPX3/ACADL/ITGA7/PPARG/MRAP/GPAM/REEP6/LIPE/LIFR/LPL/PTGER3/CYP4B1/ITIH5/CD36/CIDEA/FABP4/LEP/ADIPOQ	Enriched in Normal
HALLMARK_INFLAMMATORY_RESPONSE	HALLMARK_INFLAMMATORY_RESPONSE	192	0.303787	1.47936	0.00049028	0.00136189	0.000573427	4055	tags=25%, list=16%, signal=21%	CXCL10/INHBA/CXCL9/OLR1/LAMP3/CXCL11/CLEC5A/IL1A/TNFRSF9/IL1B/MSR1/CCL20/GPR132/SPHK1/NOD2/RTP4/RGS16/CCR7/TNFAIP6/PLAUR/SELL/TIMP1/CCL5/CSF3R/NMI/IL2RB/LCK/CD48/ADRM1/RIPK2/LTA/LY6E/SLC7A1/RASGRP1/LYN/LIF/FPR1/TPBG/TAPBP/CD70/ICAM1/MEFV/OSM/EIF2AK2/IRAK2/LCP2/ATP2C1/SEMA4D	Enriched in Tumor
HALLMARK_TNFA_SIGNALING_VIA_NFKB	HALLMARK_TNFA_SIGNALING_VIA_NFKB	196	0.299365	1.43803	0.000877356	0.00230883	0.00097214	2152	tags=18%, list=9%, signal=16%	CXCL10/INHBA/OLR1/BCL2A1/CXCL11/IL1A/PLAU/CD83/SLC2A6/TNFRSF9/IL1B/CCL20/PHLDA2/SPHK1/BCL3/CD80/YRDC/SERPINB8/VEGFA/KYNU/NFKBIE/RELB/PLEK/TNFAIP6/TNIP2/TAP1/REL/PLAUR/CCL5/IFIH1/FOSL1/DDX58/RIPK2/RNF19B/SAT1	Enriched in Tumor
HALLMARK_KRAS_SIGNALING_DN	HALLMARK_KRAS_SIGNALING_DN	184	-0.42205	-1.49062	0.00133029	0.00332573	0.00140031	4734	tags=34%, list=19%, signal=28%	GAMT/PDK2/KCNQ2/HNF1A/SIDT1/SLC30A3/BTG2/TNNI3/ITIH3/COL2A1/AMBN/PRODH/P2RY4/EDN1/ATP4A/SLC5A5/MYO15A/IGFBP2/SOX10/NR4A2/CDH16/NPY4R/SHOX2/COPZ2/PCDHB1/GRID2/NTF3/RYR1/EPHA5/CLDN16/KRT15/CYP11B2/TSHB/ACTC1/PAX4/P2RX6/KRT13/UGT2B17/SERPINA10/IRS4/ABCB11/AKR1B10/DCC/KRT5/KCNMB1/SCN10A/CNTFR/EGF/KRT1/CPA2/CLDN8/IL5/CACNA1F/PAX3/THRB/SLC16A7/PTGFR/GP2/CPB1/MYH7/TFAP2B/TENM2/ZBTB16	Enriched in Normal
HALLMARK_SPERMATOGENESIS	HALLMARK_SPERMATOGENESIS	121	0.334696	1.50581	0.00139911	0.00333122	0.00140262	1525	tags=19%, list=6%, signal=18%	CDK1/NEK2/BUB1/KIF2C/NCAPH/TTK/CDKN3/AURKA/EZH2/CNIH2/SNAP91/GRM8/CCNB2/ART3/OAZ3/IL12RB2/SLC2A5/PCSK1N/SCG5/RFC4/LDHC/ACRV1/HSPA2	Enriched in Tumor
HALLMARK_UV_RESPONSE_UP	HALLMARK_UV_RESPONSE_UP	152	0.301928	1.41648	0.00148825	0.00338239	0.00142416	3716	tags=32%, list=15%, signal=28%	GAL/CCNE1/CHRNA5/CTSV/FEN1/MAPK8IP2/BAK1/POLE3/GGH/CEBPG/CDC34/EPCAM/STIP1/NPTXR/PPIF/RFC4/TAP1/HMOX1/DNAJA1/FKBP4/TFRC/E2F5/HSPA2/YKT6/POLR2H/ENO2/PPAT/TUBA4A/AGO2/ATP6V1C1/MARK2/CDK2/SLC6A8/RPN1/AMD1/RASGRP1/LYN/DDX21/ASNS/ATP6V1F/ALDOA/CDKN2B/FURIN/PDAP1/BSG/CASP3/ICAM1/CLCN2/ALAS1	Enriched in Tumor
HALLMARK_REACTIVE_OXYGEN_SPECIES_PATHWAY	HALLMARK_REACTIVE_OXYGEN_SPECIES_PATHWAY	47	0.451957	1.71314	0.0015985	0.003475	0.00146316	6566	tags=53%, list=27%, signal=39%	CDKN2D/SRXN1/GLRX2/GLRX/IPCEF1/PFKP/PRDX1/PRDX4/TXN/NDUFS2/LAMTOR5/ABCC1/SBNO2/G6PD/PRDX2/FES/GCLM/TXNRD1/NDUFA6/SOD2/NQO1/NDUFB4/HMOX2/ERCC2/OXSR1	Enriched in Tumor
HALLMARK_PANCREAS_BETA_CELLS	HALLMARK_PANCREAS_BETA_CELLS	34	-0.535141	-1.5579	0.0173694	0.0353857	0.0148992	4569	tags=50%, list=19%, signal=41%	HNF1A/DCX/LMO2/G6PC2/STXBP1/PCSK1/CHGA/GCK/DPP4/IAPP/NEUROD1/SLC2A2/PAX4/FOXO1/ISL1/PAK3/ABCC8	Enriched in Normal
HALLMARK_FATTY_ACID_METABOLISM	HALLMARK_FATTY_ACID_METABOLISM	154	-0.395075	-1.37749	0.0183038	0.0353857	0.0148992	3442	tags=17%, list=14%, signal=15%	HPGD/ACOT2/ACSL1/HSD17B11/PTPRG/XIST/CYP1A1/ACSM3/MGLL/FABP1/INMT/ACADL/FMO1/G0S2/CYP4A11/REEP6/AOC3/ALDH1A1/HMGCS2/MAOA/GPD1/CD36/CA4/AQP7/ADH1C/CIDEA	Enriched in Normal
HALLMARK_ESTROGEN_RESPONSE_LATE	HALLMARK_ESTROGEN_RESPONSE_LATE	196	0.261926	1.25819	0.0189958	0.0353857	0.0148992	2988	tags=26%, list=12%, signal=23%	TOP2A/CDC20/GAL/KIF20A/GINS2/CDC6/S100A9/NMU/SLC7A5/RNASEH2A/SERPINA3/IMPA2/STIL/TSTA3/FGFR3/OPN3/COX6C/ISG20/PLK4/GJB3/DHCR7/PPIF/CLIC3/NXT1/LLGL2/SFN/MAPK13/PERP/SLC16A1/LSR/FKBP4/SNX10/FRK/ST14/HR/HPRT1/CD9/CELSR2/ALDH3B1/PKP3/CD44/PTPN6/KCNK5/IL17RB/TIAM1/IDH2/SLC1A4/FABP5/CCNA1/GALE	Enriched in Tumor
HALLMARK_UV_RESPONSE_DN	HALLMARK_UV_RESPONSE_DN	138	-0.40145	-1.38931	0.0191083	0.0353857	0.0148992	6125	tags=35%, list=25%, signal=26%	PTPRM/NRP1/APBB2/DAB2/MYC/PDGFRB/KALRN/FZD2/NFIB/ITGB3/DBP/FHL2/PRKCE/MET/PTPN21/ADD3/ID1/AMPH/KCNMA1/RND3/NR3C1/CACNA1A/CITED2/SMAD3/MT1E/SYNE1/F3/CDON/IRS1/DLC1/INPP4B/LPAR1/PRKAR2B/TGFBR2/EFEMP1/RBPMS/SNAI2/MAGI2/MGLL/DUSP1/MMP16/TFPI/FBLN5/TGFBR3/CAV1/KIT/PPARG/PTGFR	Enriched in Normal
HALLMARK_BILE_ACID_METABOLISM	HALLMARK_BILE_ACID_METABOLISM	110	-0.415931	-1.4219	0.0201286	0.0359439	0.0151343	4984	tags=28%, list=20%, signal=23%	NR1I2/SLC23A1/CAT/EPHX2/ABCA4/NUDT12/CH25H/ABCA5/ACSL1/HSD17B11/APOA1/HSD3B1/ABCG8/BMP6/SOAT2/NR3C2/RXRG/SERPINA6/CYP7A1/AKR1D1/NR1H4/GC/AR/LIPE/CYP8B1/ABCD2/ABCA6/ABCA9/ALDH1A1/SLCO1A2/ABCA8	Enriched in Normal
HALLMARK_APICAL_SURFACE	HALLMARK_APICAL_SURFACE	43	-0.483855	-1.45815	0.0238095	0.0410509	0.0172846	3526	tags=26%, list=14%, signal=22%	AFAP1L2/CX3CL1/RTN4RL1/GAS1/GSTM3/ATP6V0A4/SCUBE1/SLC22A12/SRPX/PKHD1/SLC2A4	Enriched in Normal

## Sheet: Ovary_TumorVsNormal_GSEA
ID	Description	setSize	enrichmentScore	NES	pvalue	p.adjust	qvalues	rank	leading_edge	core_enrichment	Phenotype
HALLMARK_ALLOGRAFT_REJECTION	HALLMARK_ALLOGRAFT_REJECTION	186	0.590671	2.85102	1e-10	5e-10	2.21053e-10	4942	tags=53%, list=20%, signal=43%	CXCL13/MMP9/CXCL9/TNF/GZMB/IL2RB/C2/IL10/CCR1/CCL11/BCAT1/IL12RB1/SOCS1/CDKN2A/INHBA/IL27RA/INHBB/CD80/CXCR3/LCK/IL2RG/CD3D/HLA-DQA1/CAPG/CD79A/STAT1/NME1/TAP2/CD3G/CCL13/PRKCG/CCR2/IL11/TAP1/MAP4K1/IL1B/ITGB2/ICAM1/CSF1/FASLG/TPD52/PTPN6/CFP/F2R/HLA-DMB/HLA-DMA/RIPK2/AKT1/CD86/LCP2/EIF5A/CTSS/CSK/CD2/BRCA1/MTIF2/NCR1/THY1/CCND3/IRF4/CD74/GCNT1/TAPBP/IL18/TRAF2/FCGR2B/HLA-DRA/LTB/GPR65/CD8B/CD4/S…	Enriched in Tumor
HALLMARK_E2F_TARGETS	HALLMARK_E2F_TARGETS	195	0.721306	3.46915	1e-10	5e-10	2.21053e-10	3343	tags=49%, list=14%, signal=43%	MYBL2/SPC25/CDCA8/BIRC5/KIF18B/AURKB/RRM2/SPC24/DEPDC1/CDCA3/ASF1B/MELK/HMMR/PLK1/ESPL1/GINS1/CENPM/CCNE1/DLGAP5/CDC25A/CDC20/PTTG1/MKI67/CDK1/TOP2A/BUB1B/RAD51AP1/UBE2T/CHEK1/KIF2C/CDKN3/CIT/GINS4/DIAPH3/TRIP13/CCNB2/RACGAP1/TACC3/AURKA/CENPE/LMNB1/CKS2/TK1/KIF4A/ORC6/KPNA2/CDKN2A/HMGA1/TCF19/HMGB3/MCM2/EZH2/PLK4/TIMELESS/SMC4/DCLRE1B/UBE2S/MTHFD2/SPAG5/NME1/MCM4/ATAD2/CHEK2/NCAPD2/PCNA/POLD1/BR…	Enriched in Tumor
HALLMARK_G2M_CHECKPOINT	HALLMARK_G2M_CHECKPOINT	190	0.698156	3.36467	1e-10	5e-10	2.21053e-10	2553	tags=41%, list=10%, signal=37%	MYBL2/UBE2C/BIRC5/TTK/AURKB/TPX2/EXO1/CENPA/PBK/E2F1/HMMR/PLK1/CDC45/ESPL1/NUSAP1/KIF11/GINS2/NEK2/CDC25A/CDC20/PTTG1/MKI67/TROAP/CDK1/TOP2A/CENPF/BUB1/NDC80/POLQ/CHEK1/KIF2C/CDKN3/E2F2/KIF23/KIF15/CCNB2/RACGAP1/CDC6/TACC3/AURKA/CENPE/LMNB1/CKS2/KIF4A/ORC6/KPNA2/STIL/TRAIP/PRC1/HMGA1/UCK2/HMGB3/MCM2/E2F3/EZH2/PLK4/SMC4/UBE2S/CCNF/RAD54L/SLC38A1/BRCA2/DDX39A/CDC7/KIF20B/MAD2L1/FBXO5/KIF22/STMN1/DT…	Enriched in Tumor
HALLMARK_INTERFERON_ALPHA_RESPONSE	HALLMARK_INTERFERON_ALPHA_RESPONSE	95	0.664753	2.87796	1e-10	5e-10	2.21053e-10	5477	tags=64%, list=22%, signal=50%	IFI30/OASL/CXCL10/CXCL11/ISG15/LAMP3/USP18/OAS1/IFI27/IFI44L/TRIM14/BATF2/EPSTI1/RSAD2/RTP4/LY6E/UBE2L6/MX1/IFI44/LAP3/PARP12/TAP1/PARP14/IFIT3/CSF1/PSME2/CMPK2/IFITM1/PSMB8/PARP9/RIPK2/IFI35/IFIH1/PSMB9/NMI/IFIT2/CD74/ISG20/LGALS3BP/HELZ2/STAT2/B2M/PSME1/IRF9/PNPT1/MOV10/SAMD9/HLA-C/CD47/PLSCR1/TRIM26/ADAR/IL15/RNF31/TRIM25/GBP4/TRAFD1/DDX60/CMTR1/EIF2AK2/IFITM3	Enriched in Tumor
HALLMARK_INTERFERON_GAMMA_RESPONSE	HALLMARK_INTERFERON_GAMMA_RESPONSE	198	0.598635	2.84218	1e-10	5e-10	2.21053e-10	5557	tags=59%, list=23%, signal=46%	IFI30/OASL/CXCL10/CXCL11/ISG15/ZBP1/CXCL9/METTL7B/USP18/OAS3/IL2RB/OAS2/IFI27/IFI44L/UPP1/TRIM14/BATF2/PNP/EPSTI1/IDO1/RSAD2/SOCS1/RTP4/LY6E/VAMP8/MX2/TNFAIP6/CFB/HLA-DQA1/UBE2L6/MTHFD2/STAT1/MX1/SLAMF7/TNFAIP2/SECTM1/NLRC5/IFI44/LAP3/PARP12/TAP1/PARP14/IFIT3/ICAM1/IFIT1/PSME2/FCGR1A/CMPK2/PTPN6/PSMB8/HLA-DMA/IRF5/RIPK2/LYSMD2/CD86/LCP2/IFI35/PSMB2/FPR1/IFIH1/APOL6/MYD88/TNFSF10/PSMB9/NMI/VCAM1/D…	Enriched in Tumor
HALLMARK_MITOTIC_SPINDLE	HALLMARK_MITOTIC_SPINDLE	197	0.504657	2.40385	1e-10	5e-10	2.21053e-10	2003	tags=18%, list=8%, signal=17%	BIRC5/TTK/TPX2/ANLN/PLK1/ESPL1/NUSAP1/KIF11/DLGAP5/NEK2/CDK1/TOP2A/CENPF/BUB1/NDC80/KIF2C/KIF23/KIF15/CCNB2/ECT2/RACGAP1/AURKA/CENPE/LMNB1/KIF4A/PRC1/SMC4/PIF1/BRCA2/KNTC1/SAC3D1/KIF20B/FBXO5/KIF22/MID1IP1/INCENP	Enriched in Tumor
HALLMARK_MTORC1_SIGNALING	HALLMARK_MTORC1_SIGNALING	195	0.581694	2.79768	1e-10	5e-10	2.21053e-10	4781	tags=51%, list=19%, signal=42%	IFI30/RRM2/PLK1/CDC25A/TRIB3/BUB1/AURKA/BCAT1/SCD/PNP/MCM2/GAPDH/SDF2L1/EEF1E1/PSAT1/MTHFD2/DHCR24/MCM4/ENO1/CCNF/SLC37A4/TOMM40/DDX39A/CORO1A/DDIT4/EBP/TPI1/ITGB2/PDK1/ALDOA/SLC2A1/PPA1/PSMD14/NFKBIB/CFP/DAPP1/HSPE1/SLC1A5/ARPC5L/SHMT2/FKBP2/GPI/DHCR7/LDHA/PGK1/SQLE/AK4/ELOVL6/PRDX1/SORD/POLR3G/GOT1/SLC7A5/PIK3R3/YKT6/SRD5A1/CD9/PPIA/DHFR/RPN1/ACTR2/ACTR3/GMPS/HMBS/SLA/STC1/CTSC/XBP1/UNG/SSR1/PD…	Enriched in Tumor
HALLMARK_MYC_TARGETS_V1	HALLMARK_MYC_TARGETS_V1	194	0.626468	2.99924	1e-10	5e-10	2.21053e-10	7142	tags=70%, list=29%, signal=50%	CDC45/CDC20/KPNA2/TYMS/MCM2/CSTF2/NME1/MCM4/PCNA/VBP1/CYC1/COX5A/MAD2L1/RPLP0/PSMD14/PRDX4/HSPE1/PHB/SRM/LDHA/PGK1/STARD7/RFC4/SNRPD1/PSMB2/RAN/LSM2/PABPC1/RPS3/PSMA6/PSMA7/SNRPA1/CBX3/SRSF2/XPOT/HDGF/APEX1/PPIA/CAD/NOP56/CCT3/MCM7/CCNA2/NHP2/TXNL4A/ILF2/MRPL9/MCM6/PRDX3/CCT2/SRPK1/SSBP1/PSMA2/MCM5/ODC1/PSMA4/RPS2/PSMD8/RANBP1/G3BP1/NCBP2/POLE3/VDAC1/CLNS1A/NOLC1/POLD2/PA2G4/COPS5/DDX21/EEF1B2/EI…	Enriched in Tumor
HALLMARK_MYC_TARGETS_V2	HALLMARK_MYC_TARGETS_V2	58	0.661514	2.5448	1e-10	5e-10	2.21053e-10	6589	tags=74%, list=27%, signal=54%	PLK1/EXOSC5/PLK4/SLC29A2/MCM4/HSPE1/PHB/DCTPP1/SRM/SORD/CBX3/NOP56/FARSA/PUS1/RABEPK/TBRG4/UNG/NOP2/IPO4/MCM5/HK2/MRTO4/DUSP2/IMP4/WDR43/NOLC1/PA2G4/PPRC1/BYSL/NDUFAF4/WDR74/RRP9/RRP12/AIMP2/PES1/TFB2M/TCOF1/GNL3/DDX18/TMEM97/SLC19A1/SUPV3L1/MPHOSPH10	Enriched in Tumor
HALLMARK_OXIDATIVE_PHOSPHORYLATION	HALLMARK_OXIDATIVE_PHOSPHORYLATION	184	0.502635	2.41727	1e-10	5e-10	2.21053e-10	7382	tags=58%, list=30%, signal=41%	TIMM10/TIMM8B/COX8A/MRPS12/BAX/SLC25A5/ATP6V1C1/CYC1/UQCRQ/COX5A/COX5B/COX6A1/COX6C/GPI/LDHA/TIMM17A/ATP6V0B/MDH2/MRPL15/NDUFC2/UQCRH/NDUFS8/COX7A2L/IDH2/NDUFB6/VDAC2/COX7A2/COX7B/NDUFA7/TIMM50/HCCS/MRPL34/MRPL11/LDHB/NDUFA9/UQCRFS1/ATP6V0E1/COX6B1/UQCR10/ATP6AP1/ATP6V1F/MTX2/MDH1/PRDX3/NDUFB7/MRPS15/NDUFB2/NDUFB5/ECHS1/ACAA1/VDAC1/TOMM22/NDUFB3/TCIRG1/ALAS1/COX4I1/UQCRC1/MRPL35/ATP6V0C/NDUFV1/AC…	Enriched in Tumor
HALLMARK_INFLAMMATORY_RESPONSE	HALLMARK_INFLAMMATORY_RESPONSE	192	0.427698	2.05995	1.0905e-09	4.95681e-09	2.19143e-09	2722	tags=27%, list=11%, signal=24%	CXCL10/CXCL11/CLEC5A/LAMP3/CXCL9/IL1A/GNA15/TNFRSF9/CCL20/IL2RB/IL10/OLR1/CHST2/RGS16/PIK3R5/INHBA/RTP4/LY6E/ROS1/OSM/CXCL6/ICAM4/LCK/TNFAIP6/P2RY2/SERPINE1/PTAFR/TNFSF15/HPN/FZD5/IL1B/ICAM1/CSF1/MSR1/IFITM1/EBI3/RNF144B/RIPK2/NOD2/LCP2/APLNR/CD70/CD82/FPR1/TNFSF10/NMI/RGS1/CYBB/ADRM1/TAPBP/IL18	Enriched in Tumor
HALLMARK_GLYCOLYSIS	HALLMARK_GLYCOLYSIS	197	0.413036	1.96743	5.45783e-09	2.27409e-08	1.00539e-08	4838	tags=40%, list=20%, signal=32%	KIF20A/DEPDC1/CENPA/HMMR/B3GNT3/CDK1/EFNA3/STC2/SDC1/CHST2/AURKA/VCAN/BIK/SRD5A3/TSTA3/CLDN3/ENO1/SLC37A4/PKM/AGRN/ELF3/DDIT4/POLR3K/TPI1/ALDOA/SLC16A3/SLC25A10/VEGFA/MIF/CLN6/B4GALT2/TGFBI/PFKFB1/B3GAT3/STMN1/PPFIA4/DSC2/LDHA/PGK1/AK4/MDH2/GOT1/PGLS/SOX9/ARTN/PPIA/PMM2/ISG20/QSOX1/B3GAT1/FAM162A/IER3/FKBP4/MDH1/STC1/GALK1/CASP6/PFKP/G6PD/AKR1A1/HK2/CLDN9/GALE/BPNT1/EGLN3/TKTL1/GMPPA/IL13RA1/PGAM…	Enriched in Tumor
HALLMARK_UNFOLDED_PROTEIN_RESPONSE	HALLMARK_UNFOLDED_PROTEIN_RESPONSE	106	0.48327	2.1412	4.14133e-08	1.59282e-07	7.04193e-08	7906	tags=63%, list=32%, signal=43%	STC2/EXOSC5/EXOSC4/PSAT1/MTHFD2/DDIT4/EIF4EBP1/IFIT1/VEGFA/FKBP14/LSM4/SLC7A5/XPOT/YWHAZ/NOP56/PDIA5/HYOU1/CKS1B/NHP2/YIF1A/CEBPG/LSM1/XBP1/SSR1/RPS14/SEC11A/SRPRB/NABP1/EIF4G1/ALDH18A1/BANF1/NOLC1/PDIA6/CHAC1/EIF4A3/EIF4A1/POP4/SERP1/NOP14/RRP9/DKC1/EIF2S1/NFYA/WIPI1/PREB/SPCS1/EXOC2/PAIP1/EDEM1/ARFGAP1/SLC1A4/HSP90B1/SDAD1/HSPA9/DCP2/CNOT6/CEBPB/KHSRP/ATP6V0D1/CCL2/ASNS/EXOSC1/PARN/CNOT2/EIF4E/…	Enriched in Tumor
HALLMARK_DNA_REPAIR	HALLMARK_DNA_REPAIR	148	0.432985	1.97824	8.23568e-08	2.94131e-07	1.30037e-07	6450	tags=42%, list=26%, signal=31%	ZWINT/PDE6G/PNP/FEN1/TYMS/NME1/PCNA/POLD1/ZNF707/TARBP2/SAC3D1/RALA/CMPK2/ALYREF/RAE1/RFC4/BOLA2/ITPA/ADRM1/GUK1/BCAM/SEC61A1/POLR2D/RAD51/POLR2G/PRIM1/HCLS1/RFC5/DAD1/NCBP2/CDA/RFC2/POLR2H/VPS37D/HPRT1/RFC3/SSRP1/APRT/NELFCD/STX3/ZNRD1/POLR1C/RBX1/TMED2/BCAP31/UMPS/GTF2A2/NELFE/POLR2K/NELFB/NT5C/VPS28/ARL6IP1/POLD3/RPA3/TAF6/POLA2/POLD4/TAF13/SDCBP/SUPT4H1/TAF12	Enriched in Tumor
HALLMARK_P53_PATHWAY	HALLMARK_P53_PATHWAY	190	0.372128	1.79342	4.39938e-06	1.46646e-05	6.4833e-06	3156	tags=24%, list=13%, signal=21%	IFI30/VDR/IL1A/TRIB3/TRIAP1/KLK8/SFN/ALOX15B/SDC1/UPP1/RGS16/RHBDF2/SOCS1/CDKN2A/NUDT15/IRAK1/INHBB/DEF6/VAMP8/KRT17/GADD45A/ZNF365/S100A4/PCNA/BAX/ST14/RAP2B/DDIT4/TAP1/BLCAP/CTSD/F2R/HMOX1/BAK1/PERP/TNNI1/CDKN2B/CD82/CCND3/LDHB/SEC61A1/TM4SF1/FAM162A/IER3/DCXR	Enriched in Tumor
HALLMARK_MYOGENESIS	HALLMARK_MYOGENESIS	194	-0.481144	-1.70468	5.40629e-06	1.68947e-05	7.46922e-06	5425	tags=41%, list=22%, signal=32%	SCHIP1/MAPK12/MEF2A/AEBP1/IGF1/FABP3/ADCY9/COL15A1/MYH4/GSN/SH3BGR/CLU/CRYAB/CTF1/MEF2C/FST/BIN1/MYL1/KCNH2/COL6A2/DMPK/SGCG/HBEGF/TCAP/ACHE/HSPB2/CD36/MAPRE3/ITGA7/MYH8/SVIL/TPM2/PKIA/COX7A1/CDKN1A/NOS1/TAGLN/CDH13/MYH2/EFS/ACTN3/MYH1/SMTN/MYH7/PYGM/AK1/CKB/DTNA/KCNH1/SPEG/MYLK/PGAM2/NCAM1/HSPB8/GNAO1/PPP1R3C/PTGIS/SORBS1/ACTN2/FHL1/LAMA2/CFD/FGF2/SGCA/ACTC1/MYL3/SOD3/CACNA1H/HRC/MYOM1/APOD/FXYD…	Enriched in Normal
HALLMARK_TNFA_SIGNALING_VIA_NFKB	HALLMARK_TNFA_SIGNALING_VIA_NFKB	196	0.349136	1.66414	1.14659e-05	3.37233e-05	1.49092e-05	3031	tags=24%, list=12%, signal=21%	CXCL10/CXCL11/IL1A/SLC2A6/TNF/KYNU/FJX1/TNFRSF9/CCL20/OLR1/PLAU/INHBA/CXCL1/CXCL6/CD80/TNFAIP6/SERPINE1/BCL2A1/NFKBIE/GADD45A/TNFAIP2/F2RL1/IL23A/YRDC/TAP1/IL1B/ICAM1/CSF1/TNFAIP8/PTX3/VEGFA/PLEK/PHLDA2/RIPK2/IFIH1/DUSP5/TNC/DDX58/ZC3H12A/IFIT2/SERPINB8/TRIB1/EFNA1/IL18/DUSP4/SDC4/IER3	Enriched in Tumor
HALLMARK_IL6_JAK_STAT3_SIGNALING	HALLMARK_IL6_JAK_STAT3_SIGNALING	85	0.433074	1.83887	7.02403e-05	0.000193134	8.53855e-05	5157	tags=46%, list=21%, signal=36%	CXCL10/CXCL11/CXCL13/CXCL9/TNF/TNFRSF12A/CCR1/IL12RB1/IL9R/PIK3R5/SOCS1/CXCL1/IL2RG/STAT1/IL1B/CSF1/EBI3/HMOX1/BAK1/MYD88/TNFRSF21/CD9/ITGA4/LTB/CSF2RB/STAT2/IRF9/IL2RA/CXCL3/LTBR/IL13RA1/CCL7/IFNGR2/TLR2/IFNAR1/TYK2/GRB2/PTPN2/SOCS3	Enriched in Tumor
HALLMARK_ESTROGEN_RESPONSE_LATE	HALLMARK_ESTROGEN_RESPONSE_LATE	196	0.330669	1.57611	7.33909e-05	0.000193134	8.53855e-05	3742	tags=33%, list=15%, signal=28%	KIF20A/GINS2/CDC20/TOP2A/S100A9/CA2/TFAP2C/NMU/SFN/BATF/CDC6/STIL/KLK10/CYP4F11/PPIF/PKP3/TSTA3/PLK4/NXT1/ASS1/SCNN1A/GAL/KRT19/ST14/SERPINA1/CLIC3/MAPK13/PTPN6/FABP5/SNX10/COX6C/KCNK5/PERP/DHCR7/MEST/RET/MDK/OVOL2/SORD/RNASEH2A/SLC7A5/IDH2/RAB31/CD9/KLK11/LLGL2/ISG20/GJB3/SULT2B1/CCNA1/TNNC1/FKBP4/DCXR/PTGER3/SERPINA5/XBP1/LSR/OPN3/MICB/PRSS23/EMP2/BLVRB/SLC2A8/GALE/DUSP2	Enriched in Tumor
HALLMARK_COMPLEMENT	HALLMARK_COMPLEMENT	196	0.323871	1.54371	0.000147507	0.000368767	0.000163034	2485	tags=21%, list=10%, signal=19%	APOC1/S100A9/CA2/KYNU/MMP13/GZMB/MMP12/C2/RABIF/CP/OLR1/PIK3R5/CTSV/CXCL1/DUSP6/LCK/SERPINE1/CFB/SPOCK2/FCER1G/PLA2G7/LAP3/SERPINA1/C1QA/DYRK2/GATA3/TMPRSS6/CTSD/C1QC/PLEK/CASP5/MSRB1/ATOX1/CTSB/PPP4C/LCP2/FN1/CTSS/PSMB9/RCE1/DUSP5	Enriched in Tumor
HALLMARK_PI3K_AKT_MTOR_SIGNALING	HALLMARK_PI3K_AKT_MTOR_SIGNALING	100	0.384252	1.69192	0.000398774	0.000949463	0.000419763	5952	tags=45%, list=24%, signal=34%	E2F1/CDK1/TRIB3/SFN/LCK/IL2RG/VAV3/PPP1CA/CFL1/PDK1/SLC2A1/FASLG/NFKBIB/DAPP1/AKT1/MYD88/PIK3R3/CSNK2B/RPS6KA1/ARPC3/TRAF2/ACTR2/ACTR3/SLA/YWHAB/AKT1S1/STAT2/ARHGDIA/AP2M1/TIAM1/CLTC/GSK3B/PFN1/DDIT3/CXCR4/NCK1/ARF1/GRB2/CAMK4/CDK2/TBK1/MAPKAP1/PLA2G12A/SQSTM1/THEM4	Enriched in Tumor
HALLMARK_IL2_STAT5_SIGNALING	HALLMARK_IL2_STAT5_SIGNALING	193	0.304335	1.46657	0.00120962	0.00274915	0.00121541	3421	tags=25%, list=14%, signal=22%	CXCL10/CCNE1/SPP1/TNFRSF18/CA2/ETV4/TNFRSF9/IL2RB/TNFRSF4/BATF/CCR4/IL10/CDC6/S100A1/RGS16/CDCP1/PNP/SOCS1/UCK2/SLC29A2/CAPG/ICOS/SPRY4/APLP1/CSF1/CTLA4/SLC1A5/CD86/PRAF2/MUC1/CST7/TNFSF10/PDCD2L/TLR7/CTSZ/TNFRSF21/CCND3/IRF4/AHCY/IKZF2/LTB/GPR65/RHOH/PUS1/XBP1/NOP2/ODC1/BCL2L1/GSTO1	Enriched in Tumor
HALLMARK_UV_RESPONSE_UP	HALLMARK_UV_RESPONSE_UP	152	0.314801	1.47182	0.00263007	0.00571753	0.00252775	4275	tags=34%, list=17%, signal=28%	CCNE1/CHRNA5/CA2/FGF18/NPTX2/GGH/IGFBP2/CTSV/FEN1/PPIF/SLC6A12/GAL/ATP6V1C1/TAP1/ALDOA/ICAM1/AP2S1/EPCAM/PPAT/HMOX1/GRINA/BAK1/TGFBRAP1/RFC4/CDKN2B/RET/YKT6/E2F5/TMBIM6/CCND3/RPN1/BCL2L11/ATP6V1F/CREG1/CEBPG/FKBP4/WIZ/PRKCD/BID/PPT1/PDAP1/MGAT1/MMP14/ACAA1/FURIN/POLE3/MARK2/LYN/POLR2H/ALAS1/DDX21/DGAT1	Enriched in Tumor
HALLMARK_UV_RESPONSE_DN	HALLMARK_UV_RESPONSE_DN	138	-0.424345	-1.46197	0.00705381	0.0146954	0.00649693	5464	tags=33%, list=22%, signal=26%	YTHDC1/SCHIP1/INPP4B/GRK5/NFIB/CELF2/SNAI2/PTPN21/NRP1/DUSP1/IGF1R/ADORA2B/PMP22/SDC2/PTPRM/PRKAR2B/PDGFRB/ID1/FYN/CITED2/RGS4/PLCB4/CAP2/PPARG/DLC1/KCNMA1/EFEMP1/CDON/AKT3/VLDLR/IRS1/LTBP1/MAGI2/FBLN5/CAV1/TGFBR3/F3/AMPH/RBPMS/TFPI/IGFBP5/KIT/SYNE1/MMP16/CACNA1A/PTGFR	Enriched in Normal
HALLMARK_APOPTOSIS	HALLMARK_APOPTOSIS	157	0.291148	1.37417	0.00942664	0.0188533	0.00833514	3411	tags=24%, list=14%, signal=21%	IL1A/TOP2A/TNF/TNFRSF12A/GNA15/GUCY2D/BIK/KRT18/GADD45A/BAX/EBP/TAP1/PMAIP1/TSPO/IL1B/SLC20A1/FASLG/ERBB3/F2R/HMOX1/GPX1/DAP3/SMAD7/TNFSF10/CD2/VDAC2/BRCA1/IL18/ISG20/BGN/CCNA1/BCL2L11/IER3/PEA15/BID/PPT1/CASP6/BCL2L1	Enriched in Tumor
HALLMARK_KRAS_SIGNALING_UP	HALLMARK_KRAS_SIGNALING_UP	191	0.277646	1.33377	0.0149903	0.0288275	0.0127448	2723	tags=23%, list=11%, signal=21%	ADAMDEC1/CXCL10/SPP1/MMP9/CA2/MMP11/ETV4/WNT7A/CCL20/MYCN/RGS16/PLAU/INHBA/MMD/DUSP6/IL2RG/CFB/SPON1/FCER1G/F2RL1/ADAM8/YRDC/CBX8/LAPTM5/MAP4K1/LCP1/KCNN4/IL1B/ITGB2/TMEM158/EPHB2/KIF5C/PSMB8/ZNF639/ST6GAL1/TLR8/MAFB/ETV1/CTSS/IKZF1/PCSK1N/SOX9/TRIB1/LAT2	Enriched in Tumor
HALLMARK_REACTIVE_OXYGEN_SPECIES_PATHWAY	HALLMARK_REACTIVE_OXYGEN_SPECIES_PATHWAY	47	0.395635	1.43524	0.0162943	0.0301747	0.0133404	8288	tags=55%, list=34%, signal=37%	SRXN1/CDKN2D/GLRX2/NQO1/PRDX4/ATOX1/PRDX1/FTL/ABCC1/PFKP/G6PD/SBNO2/PRDX6/OXSR1/LAMTOR5/GLRX/MGST1/HMOX2/GPX4/NDUFB4/PRDX2/TXN/ERCC2/GPX3/STK25/SOD2	Enriched in Tumor
