# Supplementary material for: Analysis of matched primary and recurrent BRCA1/2 mutation-associated tumors identifies recurrence-specific drivers
Source: Research Square preprint supplement (doi:10.21203/rs.3.rs-745248/v1), 2021-08-30
Supplement: Supplementary file 6 [file 70ce4bfef9b62a98e54ef89f.xlsx]

## Sheet: PrimaryRecurrent_scores
Tumor	Patient	Tumor Type	Sample Type	Site	Germline Mutation Gene	Germline Mutation (HGVS)	Stage at Diagnosis	ER status	PR status	HER2 status	LOH status	HRD_LST	HRD_NTAI	HRD_LOH	HRD_total	Tumor Mutational Burden	Aneuploidy_score
1-1	1	Breast	Primary tumor	breast	BRCA1	c.1612C>T	unknown	ER-	PR-	HER2-	LOH	43	11	24	78	14.06	15
1-2	1	Breast	Recurrence #1	liver	BRCA1	c.1612C>T	unknown	unknown	unknown	unknown	LOH	45	15	32	92	5.2	12
2-1	2	Breast	Primary tumor	breast	BRCA1	c.5027del	IIA	ER+	PR-	HER2-	LOH	45	8	29	82	3.12	12
2-2	2	Breast	Recurrence #1	lymph_node	BRCA1	c.5027del	IIA	unknown	unknown	unknown	LOH	38	6	30	74	3.88	9
3-1	3	Breast	Primary tumor	breast	BRCA1	c.4357+1G>A	IIB	ER-	PR-	HER2-	LOH	30	13	16	59	80.32	8
3-2	3	Breast	Recurrence #1	local_breast	BRCA1	c.4357+1G>A	IIB	ER-	PR-	HER2-	LOH	20	7	18	45	121.91	22
4-1	4	Breast	Primary tumor	breast	BRCA1	c.5109T>G	IA	ER-	PR-	HER2-	LOH	23	14	25	62	23.52	3
4-2	4	Breast	Recurrence #1	lung	BRCA1	c.5109T>G	IA	ER-	PR-	HER2-	LOH	27	14	22	63	9.55	4
5-1	5	Breast	Primary tumor	breast	BRCA1	c.4327C>T	IIB	ER-	PR-	HER2-	LOH	32	9	24	65	10.88	16
5-2	5	Breast	Recurrence #1	liver	BRCA1	c.4327C>T	IIB	ER-	PR-	HER2-	LOH	22	10	22	54	46.73	15
6-1	6	Breast	Primary tumor	breast	BRCA1	c.3607C>T	IB	ER-	PR-	HER2-	nonLOH	5	3	7	15	6.36	7
6-2	6	Breast	Recurrence #1	lymph_node	BRCA1	c.3607C>T	IB	ER-	PR-	HER2-	LOH	21	9	21	51	2.94	8
6-3	6	Breast	Recurrence #2	lung	BRCA1	c.3607C>T	IB	ER-	PR-	HER2-	LOH	32	13	20	65	7.08	6
6-4	6	Breast	Recurrence #3	brain	BRCA1	c.3607C>T	IB	ER-	PR-	HER2-	LOH	21	6	22	49	7.05	10
7-1	7	Breast	Primary tumor	breast	BRCA1	c.5266dup	IIIB	ER-	PR-	HER2-	LOH	8	7	28	43	6.23	5
7-2	7	Breast	Recurrence #1	brain	BRCA1	c.5266dup	IIIB	ER-	PR-	HER2-	LOH	10	5	30	45	2.95	6
8-1	8	Breast	Primary tumor	breast	BRCA1	c.68_69del	IIIB	ER-	PR-	HER2-	LOH	29	17	28	74	4.53	10
8-2	8	Breast	Recurrence #1	lung	BRCA1	c.68_69del	IIIB	ER-	PR-	HER2-	LOH	28	11	33	72	8.74	9
9-1	9	Breast	Primary tumor	breast	BRCA1	del exons 1-19	IIB	ER-	PR+	HER2-	LOH	27	4	28	59	9.27	4
9-2	9	Breast	Recurrence #1	brain	BRCA1	del exons 1-19	IIB	ER-	PR+	HER2-	LOH	22	12	26	60	5.27	3
9-3	9	Breast	Recurrence #2	brain	BRCA1	del exons 1-19	IIB	unknown	unknown	unknown	LOH	19	14	34	67	3.12	4
10-1	10	Breast	Primary tumor	breast	BRCA2	c.9382C>T	IIB	ER+	PR+	HER2-	LOH	28	3	15	46	2.06	7
10-2	10	Breast	Recurrence #1	liver	BRCA2	c.9382C>T	IIB	unknown	unknown	unknown	nonLOH	19	2	5	26	1.7	10
10-3	10	Breast	Recurrence #2	liver	BRCA2	c.9382C>T	IIB	unknown	unknown	unknown	LOH	37	5	23	65	3.34	9
11-1	11	Breast	Primary tumor	breast	BRCA2	c.9309_9310del	IIA	ER+	PR+	HER2-	nonLOH	13	6	13	32	8.74	17
11-2	11	Breast	Recurrence #1	liver	BRCA2	c.9309_9310del	IIA	unknown	unknown	unknown	nonLOH	25	12	7	44	1.3	11
11-3	11	Breast	Recurrence #2	liver	BRCA2	c.9309_9310del	IIA	unknown	unknown	unknown	LOH	29	10	19	58	1.3	3
12-1	12	Breast	Primary tumor	breast	BRCA2	c.4965C>G	IIA	ER+	PR+	HER2-	nonLOH	25	3	10	38	107.16	6
12-2	12	Breast	Recurrence #1	local_breast	BRCA2	c.4965C>G	IIA	ER+	PR+	HER2-	LOH	21	4	18	43	9.15	6
13-1	13	Breast	Primary tumor	breast	BRCA2	c.3846_3847del	IIA	ER-	PR-	HER2-	LOH	6	1	40	47	2.12	0
13-2	13	Breast	Recurrence #1	lymph_node	BRCA2	c.3846_3847del	IIA	ER-	PR-	HER2-	nonLOH	11	7	40	58	12.77	14
14-1	14	Ovary	Primary tumor	ovary	BRCA1	c.4035delA	IIC	NA	NA	NA	LOH	22	5	26	53	78.03	1
14-2	14	Ovary	Recurrence #1	intra_abdominal	BRCA1	c.4035delA	IIC	NA	NA	NA	LOH	31	8	31	70	16.12	6
15-1	15	Ovary	Primary tumor	ovary	BRCA1	c.68_69del	IIIC	NA	NA	NA	LOH	7	7	28	42	8.95	3
15-2	15	Ovary	Recurrence #1	intra_abdominal	BRCA1	c.68_69del	IIIC	NA	NA	NA	LOH	21	15	27	63	5.72	7
16-1	16	Ovary	Primary tumor	ovary	BRCA1	c.4358-4277_4484+546del	IIB	NA	NA	NA	undetermined	35	9	16	60	3.32	7
16-2	16	Ovary	Recurrence #1	intra_abdominal	BRCA1	c.4358-4277_4484+546del	IIB	NA	NA	NA	undetermined	21	18	17	56	15.36	20
17-1	17	Ovary	Primary tumor	ovary	BRCA1	c.68_69del	IC	NA	NA	NA	LOH	49	18	32	99	9.48	13
17-2	17	Ovary	Recurrence #1	intra_abdominal	BRCA1	c.68_69del	IC	NA	NA	NA	nonLOH	12	0	0	12	2.73	0
18-1	18	Ovary	Primary tumor	ovary	BRCA1	c.3155del	IIIC	NA	NA	NA	LOH	33	13	18	64	5.48	8
18-2	18	Ovary	Recurrence #1	brain	BRCA1	c.3155del	IIIC	NA	NA	NA	LOH	22	7	26	55	48.83	12
19-1	19	Ovary	Primary tumor	ovary	BRCA1	c.4327C>T	IV	NA	NA	NA	LOH	28	5	21	54	23.11	8
19-2	19	Ovary	Recurrence #1	intra_abdominal	BRCA1	c.4327C>T	IV	NA	NA	NA	LOH	26	7	21	54	15.27	3
19-3	19	Ovary	Recurrence #2	liver,spleen	BRCA1	c.4327C>T	IV	NA	NA	NA	LOH	29	5	23	57	5.59	2
20-1	20	Ovary	Primary tumor	ovary	BRCA1	c.4069G>T	III	NA	NA	NA	LOH	28	4	28	60	5.9	20
20-2	20	Ovary	Recurrence #1	intra_abdominal	BRCA1	c.4069G>T	III	NA	NA	NA	LOH	8	7	26	41	23.14	15
20-3	20	Ovary	Recurrence #2	lymph_node	BRCA1	c.4069G>T	III	NA	NA	NA	nonLOH	16	0	0	16	17.78	0
20-4	20	Ovary	Recurrence #3	lymph_node	BRCA1	c.4069G>T	III	NA	NA	NA	LOH	12	6	33	51	24.41	16
20-5	20	Ovary	Recurrence #4	intra_abdominal	BRCA1	c.4069G>T	III	NA	NA	NA	LOH	31	8	40	79	9.12	13
21-1	21	Ovary	Primary tumor	ovary	BRCA1	c.5266dup	unknown	NA	NA	NA	LOH	22	2	19	43	4.15	5
21-2	21	Ovary	Recurrence #1	lymph_node	BRCA1	c.5266dup	unknown	ER+ ovarian	PR- ovarian	HER2- ovarian	LOH	36	8	28	72	15.24	6
21-3	21	Ovary	Recurrence #2	breast	BRCA1	c.5266dup	unknown	ER+ ovarian	PR- ovarian	HER2- ovarian	LOH	31	10	28	69	21.26	5
21-4	21	Ovary	Recurrence #3	intra_abdominal	BRCA1	c.5266dup	unknown	NA	NA	NA	LOH	27	18	20	65	4.24	13
21-5	21	Ovary	Recurrence #4	lymph_node	BRCA1	c.5266dup	unknown	ER+ ovarian	PR- ovarian	HER2- ovarian	LOH	20	6	29	55	2.82	4
21-6	21	Ovary	Recurrence #5	intra_abdominal	BRCA1	c.5266dup	unknown	NA	NA	NA	LOH	8	1	26	35	3.42	4
22-1	22	Ovary	Primary tumor	ovary	BRCA1	c.1687C>T	IIIC	NA	NA	NA	LOH	20	14	15	49	20.77	15
22-2	22	Ovary	Recurrence #1	intra_abdominal	BRCA1	c.1687C>T	IIIC	NA	NA	NA	LOH	25	17	14	56	8.83	10
23-1	23	Ovary	Primary tumor	ovary	BRCA1	c.512dup	IIC	NA	NA	NA	LOH	20	12	15	47	17.52	5
23-2	23	Ovary	Recurrence #1	liver,spleen	BRCA1	c.512dup	IIC	NA	NA	NA	LOH	4	0	22	26	3.64	4
24-1	24	Ovary	Primary tumor	ovary	BRCA2	c.5946del	IIIC	NA	NA	NA	LOH	34	13	19	66	2.22	15
24-2	24	Ovary	Recurrence #1	intra_abdominal	BRCA2	c.5946del	IIIC	NA	NA	NA	LOH	23	13	19	55	10.23	12
25-1	25	Ovary	Primary tumor	ovary	BRCA2	c.3544_3545del	IIIC	NA	NA	NA	nonLOH	25	16	15	56	49.53	16
25-2	25	Ovary	Recurrence #1	intra_abdominal	BRCA2	c.3544_3545del	IIIC	NA	NA	NA	nonLOH	29	14	9	52	133.6	15
26-1	26	Ovary	Primary tumor	ovary	BRCA2	c.5946del	III	NA	NA	NA	LOH	22	5	15	42	8.12	5
26-2	26	Ovary	Recurrence #1	intra_abdominal	BRCA2	c.5946del	III	NA	NA	NA	LOH	12	5	17	34	4.2	4
27-1	27	Ovary	Primary tumor	ovary	BRCA2	c.5279C>G	IIIC	NA	NA	NA	LOH	23	3	23	49	4.76	5
27-2	27	Ovary	Recurrence #1	intra_abdominal	BRCA2	c.5279C>G	IIIC	NA	NA	NA	LOH	31	4	22	57	13.09	3
