# Supplementary material for: Analysis of matched primary and recurrent BRCA1/2 mutation-associated tumors identifies recurrence-specific drivers
Source: Research Square preprint supplement (doi:10.21203/rs.3.rs-745248/v1), 2021-08-30
Supplement: Supplementary file 8 [file 8d1c8da3fb9d80097b5f3c4b.xlsx]

## Sheet: PrimaryRecurrent_cohort_tumors
Tumor	Patient	Tumor Type	Sample Type	Site	Germline Mutation Gene	Germline Mutation (HGVS DNA)	Germline Mutation (HGVS Protein)	Tumor Stage at Diagnosis	ER status	PR status	HER2 status	LOH status	Post-platinums	Post-PARPi	Post-hormonal therapy	Post-chemotherapy	Post-chemotherapy: Microtubule inhibitors	Post-chemotherapy: Nucleoside analogs	Post-chemotherapy: Anthracyclines	Post-chemotherapy: Alkylating agents	Post-chemotherapy: Topoisomerase inhibitors	Post-radiation	Other treatment exposure	Patient Overall Survival (Months)	Patient Age at Diagnosis (Years)	Tumor + germline WES	Tumor + germline targeted sequencing	Tumor RNAseq	Tumor in TMA
1-1	1	Breast	Primary tumor	breast	BRCA1	c.1612C>T	p.Q538Ter	unknown	ER-	PR-	HER2-	LOH	FALSE	FALSE	FALSE	FALSE	NA	NA	NA	NA	NA	FALSE	none	93.24	51.76	TRUE	FALSE	FALSE	FALSE
1-2	1	Breast	Recurrence #1	liver	BRCA1	c.1612C>T	p.Q538Ter	unknown	unknown	unknown	unknown	LOH	FALSE	FALSE	FALSE	TRUE	Docetaxel	NA	NA	NA	NA	FALSE	none	93.24	51.76	TRUE	FALSE	FALSE	FALSE
2-1	2	Breast	Primary tumor	breast	BRCA1	c.5027del	p.Leu1676Ter	IIA	ER+	PR-	HER2-	LOH	FALSE	FALSE	FALSE	TRUE	Taxol	Fluorouracil	Doxorubicin	Cyclophosphamide	NA	FALSE	none	33.96	37.09	TRUE	FALSE	FALSE	FALSE
2-2	2	Breast	Recurrence #1	lymph_node	BRCA1	c.5027del	p.Leu1676Ter	IIA	unknown	unknown	unknown	LOH	TRUE	FALSE	TRUE	TRUE	Taxol	Fluorouracil	Doxorubicin	Cyclophosphamide	NA	FALSE	none	33.96	37.09	TRUE	FALSE	FALSE	FALSE
3-1	3	Breast	Primary tumor	breast	BRCA1	c.4357+1G>A	NA	IIB	ER-	PR-	HER2-	LOH	FALSE	FALSE	FALSE	TRUE	NA	NA	Adriamycin	Cyclophosphamide	NA	TRUE	none	245.88	49.88	TRUE	TRUE	TRUE	FALSE
3-2	3	Breast	Recurrence #1	local_breast	BRCA1	c.4357+1G>A	NA	IIB	ER-	PR-	HER2-	LOH	FALSE	FALSE	FALSE	TRUE	Taxol	NA	Adriamycin	Cyclophosphamide	NA	TRUE	none	245.88	49.88	TRUE	TRUE	TRUE	FALSE
4-1	4	Breast	Primary tumor	breast	BRCA1	c.5109T>G	p.Tyr1703Ter	IA	ER-	PR-	HER2-	LOH	FALSE	FALSE	FALSE	FALSE	NA	NA	NA	NA	NA	FALSE	none	173.28	26.36	TRUE	FALSE	TRUE	FALSE
4-2	4	Breast	Recurrence #1	lung	BRCA1	c.5109T>G	p.Tyr1703Ter	IA	ER-	PR-	HER2-	LOH	FALSE	FALSE	FALSE	TRUE	NA	Methotrexate, Fluorouracil	NA	Cyclophosphamide	NA	FALSE	none	173.28	26.36	TRUE	FALSE	TRUE	FALSE
5-1	5	Breast	Primary tumor	breast	BRCA1	c.4327C>T	p.Arg1443Ter	IIB	ER-	PR-	HER2-	LOH	FALSE	FALSE	FALSE	FALSE	NA	NA	NA	NA	NA	FALSE	none	34.32	48.78	TRUE	FALSE	TRUE	FALSE
5-2	5	Breast	Recurrence #1	liver	BRCA1	c.4327C>T	p.Arg1443Ter	IIB	ER-	PR-	HER2-	LOH	FALSE	FALSE	FALSE	TRUE	Taxol	NA	Adriamycin	Cyclophosphamide	NA	FALSE	none	34.32	48.78	TRUE	FALSE	TRUE	FALSE
6-1	6	Breast	Primary tumor	breast	BRCA1	c.3607C>T	p.Arg1203Ter	IB	ER-	PR-	HER2-	nonLOH	FALSE	FALSE	FALSE	FALSE	NA	NA	NA	NA	NA	FALSE	none	71.16	57.47	TRUE	TRUE	TRUE	TRUE
6-2	6	Breast	Recurrence #1	lymph_node	BRCA1	c.3607C>T	p.Arg1203Ter	IB	ER-	PR-	HER2-	LOH	FALSE	FALSE	FALSE	TRUE	Taxol	NA	Adriamycin	Cyclophosphamide	NA	FALSE	Bevacizumab	71.16	57.47	TRUE	TRUE	TRUE	FALSE
6-3	6	Breast	Recurrence #2	lung	BRCA1	c.3607C>T	p.Arg1203Ter	IB	ER-	PR-	HER2-	LOH	TRUE	FALSE	FALSE	TRUE	Taxol	Gemcitabine	Adriamycin	Cyclophosphamide	NA	TRUE	Bevacizumab	71.16	57.47	TRUE	TRUE	TRUE	TRUE
6-4	6	Breast	Recurrence #3	brain	BRCA1	c.3607C>T	p.Arg1203Ter	IB	ER-	PR-	HER2-	LOH	TRUE	FALSE	FALSE	TRUE	Taxol	Gemcitabine	Adriamycin	Cyclophosphamide	NA	TRUE	Bevacizumab	71.16	57.47	TRUE	TRUE	TRUE	FALSE
7-1	7	Breast	Primary tumor	breast	BRCA1	c.5266dup	p.Gln1756fs	IIIB	ER-	PR-	HER2-	LOH	FALSE	FALSE	FALSE	FALSE	NA	NA	NA	NA	NA	FALSE	none	57.24	47.42	TRUE	TRUE	TRUE	TRUE
7-2	7	Breast	Recurrence #1	brain	BRCA1	c.5266dup	p.Gln1756fs	IIIB	ER-	PR-	HER2-	LOH	FALSE	FALSE	FALSE	TRUE	Taxol	NA	Adriamycin	Cyclophosphamide	NA	TRUE	none	57.24	47.42	TRUE	TRUE	TRUE	TRUE
8-1	8	Breast	Primary tumor	breast	BRCA1	c.68_69del	p.Glu23fs	IIIB	ER-	PR-	HER2-	LOH	FALSE	FALSE	FALSE	FALSE	NA	NA	NA	NA	NA	FALSE	none	80.16	56.44	TRUE	TRUE	TRUE	TRUE
8-2	8	Breast	Recurrence #1	lung	BRCA1	c.68_69del	p.Glu23fs	IIIB	ER-	PR-	HER2-	LOH	TRUE	TRUE	FALSE	TRUE	Taxol, Abraxane	Gemcitabine, Capecitabine	Adriamycin	Cyclophosphamide	NA	TRUE	PD-L1 blockade (with PARPi as part of trial NCT02734004), Trastuzumab	80.16	56.44	TRUE	TRUE	TRUE	FALSE
9-1	9	Breast	Primary tumor	breast	BRCA1	del exons 1-19	NA	IIB	ER-	PR+	HER2-	LOH	FALSE	FALSE	FALSE	FALSE	NA	NA	NA	NA	NA	FALSE	none	75.72	55.79	TRUE	FALSE	TRUE	FALSE
9-2	9	Breast	Recurrence #1	brain	BRCA1	del exons 1-19	NA	IIB	ER-	PR+	HER2-	LOH	FALSE	FALSE	TRUE	TRUE	Paclitaxel	NA	Adriamycin	Cyclophosphamide	NA	TRUE	none	75.72	55.79	TRUE	FALSE	TRUE	TRUE
9-3	9	Breast	Recurrence #2	brain	BRCA1	del exons 1-19	NA	IIB	unknown	unknown	unknown	LOH	FALSE	FALSE	TRUE	TRUE	Paclitaxel	NA	Adriamycin	Cyclophosphamide	NA	TRUE	none	75.72	55.79	TRUE	FALSE	FALSE	FALSE
10-1	10	Breast	Primary tumor	breast	BRCA2	c.9382C>T	p.R3128Ter	IIB	ER+	PR+	HER2-	LOH	FALSE	FALSE	FALSE	FALSE	NA	NA	NA	NA	NA	FALSE	none	119.88	32.73	TRUE	FALSE	FALSE	FALSE
10-2	10	Breast	Recurrence #1	liver	BRCA2	c.9382C>T	p.R3128Ter	IIB	unknown	unknown	unknown	nonLOH	FALSE	FALSE	TRUE	TRUE	NA	Capecitabine	NA	NA	Etoposide	TRUE	none	119.88	32.73	TRUE	FALSE	FALSE	FALSE
10-3	10	Breast	Recurrence #2	liver	BRCA2	c.9382C>T	p.R3128Ter	IIB	unknown	unknown	unknown	LOH	FALSE	FALSE	TRUE	TRUE	NA	Capecitabine	NA	NA	Etoposide	TRUE	none	119.88	32.73	TRUE	FALSE	FALSE	FALSE
11-1	11	Breast	Primary tumor	breast	BRCA2	c.9309_9310del	p.I3103fs	IIA	ER+	PR+	HER2-	nonLOH	FALSE	FALSE	FALSE	TRUE	Docetaxel	NA	Adriamycin	NA	NA	FALSE	Bevacizumab	69.6	34.67	TRUE	FALSE	FALSE	FALSE
11-2	11	Breast	Recurrence #1	liver	BRCA2	c.9309_9310del	p.I3103fs	IIA	unknown	unknown	unknown	nonLOH	FALSE	FALSE	TRUE	TRUE	Docetaxel	NA	Adriamycin	NA	NA	FALSE	Bevacizumab	69.6	34.67	TRUE	FALSE	FALSE	FALSE
11-3	11	Breast	Recurrence #2	liver	BRCA2	c.9309_9310del	p.I3103fs	IIA	unknown	unknown	unknown	LOH	FALSE	FALSE	TRUE	TRUE	Docetaxel	NA	Adriamycin, Myocet	Cyclophosphamide	NA	FALSE	Bevacizumab	69.6	34.67	TRUE	FALSE	FALSE	FALSE
12-1	12	Breast	Primary tumor	breast	BRCA2	c.4965C>G	p.Tyr1655Ter	IIA	ER+	PR+	HER2-	nonLOH	FALSE	FALSE	FALSE	FALSE	NA	NA	NA	NA	NA	FALSE	none	128.76	47.68	TRUE	TRUE	TRUE	FALSE
12-2	12	Breast	Recurrence #1	local_breast	BRCA2	c.4965C>G	p.Tyr1655Ter	IIA	ER+	PR+	HER2-	LOH	FALSE	FALSE	TRUE	TRUE	Taxotere	NA	NA	Cyclophosphamide	NA	FALSE	none	128.76	47.68	TRUE	TRUE	TRUE	TRUE
13-1	13	Breast	Primary tumor	breast	BRCA2	c.3846_3847del	p.Val1283fs	IIA	ER-	PR-	HER2-	LOH	FALSE	FALSE	FALSE	FALSE	NA	NA	NA	NA	NA	FALSE	none	46.56	28.44	TRUE	TRUE	TRUE	FALSE
13-2	13	Breast	Recurrence #1	lymph_node	BRCA2	c.3846_3847del	p.Val1283fs	IIA	ER-	PR-	HER2-	nonLOH	FALSE	FALSE	FALSE	TRUE	Taxol	NA	Adriamycin	Cyclophosphamide	NA	TRUE	none	46.56	28.44	TRUE	TRUE	TRUE	FALSE
14-1	14	Ovary	Primary tumor	ovary	BRCA1	c.4035del	p.Glu1346fs	IIC	NA	NA	NA	LOH	FALSE	FALSE	FALSE	FALSE	NA	NA	NA	NA	NA	FALSE	none	99	55.52	TRUE	TRUE	FALSE	FALSE
14-2	14	Ovary	Recurrence #1	intra_abdominal	BRCA1	c.4035del	p.Glu1346fs	IIC	NA	NA	NA	LOH	TRUE	FALSE	FALSE	TRUE	Paclitaxel	NA	NA	NA	NA	FALSE	none	99	55.52	TRUE	TRUE	TRUE	FALSE
15-1	15	Ovary	Primary tumor	ovary	BRCA1	c.68_69del	p.Glu23fs	IIIC	NA	NA	NA	LOH	FALSE	FALSE	FALSE	TRUE	Taxol	NA	Adriamycin	NA	NA	FALSE	none	75.96	46.25	TRUE	TRUE	TRUE	FALSE
15-2	15	Ovary	Recurrence #1	intra_abdominal	BRCA1	c.68_69del	p.Glu23fs	IIIC	NA	NA	NA	LOH	TRUE	TRUE	FALSE	TRUE	Taxol, Docetaxel	Gemcitabine	Adriamycin, Doxil	Cytoxan	NA	FALSE	none	75.96	46.25	TRUE	TRUE	TRUE	FALSE
16-1	16	Ovary	Primary tumor	ovary	BRCA1	c.4358-4277_4484+546del	p.Ala1453fs	IIB	NA	NA	NA	undetermined	FALSE	FALSE	FALSE	FALSE	NA	NA	NA	NA	NA	FALSE	none	58.56	49.95	TRUE	TRUE	TRUE	TRUE
16-2	16	Ovary	Recurrence #1	intra_abdominal	BRCA1	c.4358-4277_4484+546del	p.Ala1453fs	IIB	NA	NA	NA	undetermined	TRUE	FALSE	FALSE	TRUE	Paclitaxel	NA	NA	NA	NA	FALSE	none	58.56	49.95	TRUE	TRUE	TRUE	TRUE
17-1	17	Ovary	Primary tumor	ovary	BRCA1	c.68_69del	p.Glu23fs	IC	NA	NA	NA	LOH	TRUE	FALSE	FALSE	TRUE	Paclitaxel	NA	NA	NA	NA	FALSE	none	161.52	44.09	TRUE	TRUE	TRUE	FALSE
17-2	17	Ovary	Recurrence #1	intra_abdominal	BRCA1	c.68_69del	p.Glu23fs	IC	NA	NA	NA	nonLOH	TRUE	FALSE	FALSE	TRUE	Paclitaxel	NA	NA	NA	NA	TRUE	none	161.52	44.09	TRUE	TRUE	TRUE	FALSE
18-1	18	Ovary	Primary tumor	ovary	BRCA1	c.3155del	p.Asn1052fs	IIIC	NA	NA	NA	LOH	FALSE	FALSE	FALSE	FALSE	NA	NA	NA	NA	NA	FALSE	none	100.8	51.83	TRUE	FALSE	TRUE	FALSE
18-2	18	Ovary	Recurrence #1	brain	BRCA1	c.3155del	p.Asn1052fs	IIIC	NA	NA	NA	LOH	TRUE	FALSE	FALSE	TRUE	Taxol	Temozolomide	NA	NA	NA	FALSE	Autologous dendritic cell vaccine trial	100.8	51.83	TRUE	FALSE	TRUE	FALSE
19-1	19	Ovary	Primary tumor	ovary	BRCA1	c.4327C>T	p.Arg1443Ter	IV	NA	NA	NA	LOH	FALSE	FALSE	FALSE	FALSE	NA	NA	NA	NA	NA	FALSE	none	96.6	66.28	TRUE	TRUE	TRUE	TRUE
19-2	19	Ovary	Recurrence #1	intra_abdominal	BRCA1	c.4327C>T	p.Arg1443Ter	IV	NA	NA	NA	LOH	TRUE	FALSE	FALSE	TRUE	Paclitaxel	NA	NA	NA	NA	FALSE	none	96.6	66.28	TRUE	TRUE	TRUE	FALSE
19-3	19	Ovary	Recurrence #2	liver,spleen	BRCA1	c.4327C>T	p.Arg1443Ter	IV	NA	NA	NA	LOH	TRUE	TRUE	FALSE	TRUE	Paclitaxel	NA	Doxil	Cytoxan	NA	FALSE	Bevacizumab, Vaccine trial NCT01132014	96.6	66.28	TRUE	TRUE	TRUE	TRUE
20-1	20	Ovary	Primary tumor	ovary	BRCA1	c.4069G>T	p.Glu1357Ter	III	NA	NA	NA	LOH	FALSE	FALSE	FALSE	FALSE	NA	NA	NA	NA	NA	FALSE	none	132.24	41.06	TRUE	TRUE	TRUE	TRUE
20-2	20	Ovary	Recurrence #1	intra_abdominal	BRCA1	c.4069G>T	p.Glu1357Ter	III	NA	NA	NA	LOH	TRUE	FALSE	FALSE	TRUE	Paclitaxel	NA	NA	NA	NA	FALSE	none	132.24	41.06	TRUE	TRUE	TRUE	FALSE
20-3	20	Ovary	Recurrence #2	lymph_node	BRCA1	c.4069G>T	p.Glu1357Ter	III	NA	NA	NA	nonLOH	TRUE	TRUE	FALSE	TRUE	Paclitaxel	NA	Doxil	NA	NA	FALSE	none	132.24	41.06	TRUE	TRUE	FALSE	FALSE
20-4	20	Ovary	Recurrence #3	lymph_node	BRCA1	c.4069G>T	p.Glu1357Ter	III	NA	NA	NA	LOH	TRUE	TRUE	FALSE	TRUE	Paclitaxel	NA	Doxil	NA	NA	FALSE	none	132.24	41.06	TRUE	FALSE	TRUE	FALSE
20-5	20	Ovary	Recurrence #4	intra_abdominal	BRCA1	c.4069G>T	p.Glu1357Ter	III	NA	NA	NA	LOH	TRUE	FALSE	FALSE	TRUE	Paclitaxel	NA	Doxil	NA	NA	FALSE	none	132.24	41.06	TRUE	TRUE	TRUE	TRUE
21-1	21	Ovary	Primary tumor	ovary	BRCA1	c.5266dup	p.Gln1756fs	unknown	NA	NA	NA	LOH	FALSE	FALSE	FALSE	FALSE	NA	NA	NA	NA	NA	FALSE	none	28.32	49.86	TRUE	TRUE	FALSE	TRUE
21-2	21	Ovary	Recurrence #1	lymph_node	BRCA1	c.5266dup	p.Gln1756fs	unknown	ER+ ovarian	PR- ovarian	HER2- ovarian	LOH	FALSE	FALSE	FALSE	FALSE	NA	NA	NA	NA	NA	FALSE	none	28.32	49.86	TRUE	TRUE	TRUE	FALSE
21-3	21	Ovary	Recurrence #2	breast	BRCA1	c.5266dup	p.Gln1756fs	unknown	ER+ ovarian	PR- ovarian	HER2- ovarian	LOH	FALSE	FALSE	FALSE	FALSE	NA	NA	NA	NA	NA	FALSE	none	28.32	49.86	TRUE	TRUE	TRUE	TRUE
21-4	21	Ovary	Recurrence #3	intra_abdominal	BRCA1	c.5266dup	p.Gln1756fs	unknown	NA	NA	NA	LOH	FALSE	FALSE	FALSE	FALSE	NA	NA	NA	NA	NA	FALSE	none	28.32	49.86	TRUE	FALSE	FALSE	FALSE
21-5	21	Ovary	Recurrence #4	lymph_node	BRCA1	c.5266dup	p.Gln1756fs	unknown	ER+ ovarian	PR- ovarian	HER2- ovarian	LOH	TRUE	FALSE	TRUE	TRUE	Paclitaxel	NA	NA	NA	NA	FALSE	none	28.32	49.86	TRUE	TRUE	TRUE	FALSE
21-6	21	Ovary	Recurrence #5	intra_abdominal	BRCA1	c.5266dup	p.Gln1756fs	unknown	NA	NA	NA	LOH	TRUE	FALSE	TRUE	TRUE	Paclitaxel	NA	NA	NA	NA	TRUE	none	28.32	49.86	TRUE	TRUE	TRUE	FALSE
22-1	22	Ovary	Primary tumor	ovary	BRCA1	c.1687C>T	p.Q563Ter	IIIC	NA	NA	NA	LOH	TRUE	FALSE	TRUE	TRUE	Paclitaxel	NA	NA	NA	NA	TRUE	none	93.36	60.21	TRUE	TRUE	TRUE	FALSE
22-2	22	Ovary	Recurrence #1	intra_abdominal	BRCA1	c.1687C>T	p.Q563Ter	IIIC	NA	NA	NA	LOH	TRUE	FALSE	TRUE	TRUE	Paclitaxel	Gemzar	NA	Cytoxan	NA	TRUE	Bevacizumab, Vaccine trials NCT01312376 and NCT01132014	93.36	60.21	TRUE	TRUE	TRUE	FALSE
23-1	23	Ovary	Primary tumor	ovary	BRCA1	c.512dup	p.Gln172Thrfs	IIC	NA	NA	NA	LOH	FALSE	FALSE	FALSE	FALSE	NA	NA	NA	NA	NA	FALSE	none	196.8	51.34	TRUE	FALSE	TRUE	TRUE
23-2	23	Ovary	Recurrence #1	liver,spleen	BRCA1	c.512dup	p.Gln172Thrfs	IIC	NA	NA	NA	LOH	TRUE	FALSE	FALSE	TRUE	Taxol	NA	NA	NA	NA	FALSE	Bevacizumab	196.8	51.34	TRUE	FALSE	TRUE	TRUE
24-1	24	Ovary	Primary tumor	ovary	BRCA2	c.5946del	p.Ser1982fs	IIIC	NA	NA	NA	LOH	FALSE	FALSE	FALSE	FALSE	NA	NA	NA	NA	NA	FALSE	none	134.52	43.67	TRUE	TRUE	TRUE	TRUE
24-2	24	Ovary	Recurrence #1	intra_abdominal	BRCA2	c.5946del	p.Ser1982fs	IIIC	NA	NA	NA	LOH	TRUE	FALSE	TRUE	TRUE	Taxol	NA	NA	NA	NA	FALSE	none	134.52	43.67	TRUE	TRUE	TRUE	TRUE
25-1	25	Ovary	Primary tumor	ovary	BRCA2	c.3544_3545del	p.Phe1182Ter	IIIC	NA	NA	NA	nonLOH	FALSE	FALSE	FALSE	FALSE	NA	NA	NA	NA	NA	FALSE	none	33.48	42.41	TRUE	TRUE	TRUE	TRUE
25-2	25	Ovary	Recurrence #1	intra_abdominal	BRCA2	c.3544_3545del	p.Phe1182Ter	IIIC	NA	NA	NA	nonLOH	TRUE	FALSE	FALSE	TRUE	Docetaxel, Taxol	NA	NA	NA	NA	FALSE	Bevacizumab	33.48	42.41	TRUE	TRUE	TRUE	TRUE
26-1	26	Ovary	Primary tumor	ovary	BRCA2	c.5946del	p.Ser1982fs	III	NA	NA	NA	LOH	TRUE	FALSE	FALSE	TRUE	Paclitaxel	NA	NA	NA	NA	FALSE	none	39.24	48.17	TRUE	TRUE	TRUE	FALSE
26-2	26	Ovary	Recurrence #1	intra_abdominal	BRCA2	c.5946del	p.Ser1982fs	III	NA	NA	NA	LOH	TRUE	TRUE	FALSE	TRUE	Paclitaxel	NA	NA	NA	NA	FALSE	none	39.24	48.17	TRUE	TRUE	FALSE	FALSE
27-1	27	Ovary	Primary tumor	ovary	BRCA2	c.5279C>G	p.Ser1760Ter	IIIC	NA	NA	NA	LOH	FALSE	FALSE	FALSE	FALSE	NA	NA	NA	NA	NA	FALSE	none	100.2	72.96	TRUE	TRUE	FALSE	TRUE
27-2	27	Ovary	Recurrence #1	intra_abdominal	BRCA2	c.5279C>G	p.Ser1760Ter	IIIC	NA	NA	NA	LOH	TRUE	FALSE	FALSE	TRUE	Paclitaxel	NA	NA	NA	NA	FALSE	none	100.2	72.96	TRUE	TRUE	TRUE	TRUE
28-2	28	Ovary	Recurrence #1	intra_abdominal	BRCA1	c.5179A>T	p.Lys1727Ter	IIIC	NA	NA	NA	LOH	TRUE	FALSE	FALSE	TRUE	Paclitaxel	NA	NA	NA	NA	FALSE	none	99.48	32.73	FALSE	FALSE	TRUE	FALSE
29-2	29	Ovary	Recurrence #1	intra_abdominal	BRCA1	c.5266dup	p.Gln1756fs	IA	NA	NA	NA	LOH	TRUE	FALSE	FALSE	TRUE	Taxol	NA	NA	NA	NA	FALSE	none	86.76	51.76	FALSE	FALSE	TRUE	FALSE
30-2	30	Ovary	Recurrence #1	intra_abdominal	BRCA2	c.5946del	p.Ser1982fs	IV	NA	NA	NA	nonLOH	TRUE	FALSE	FALSE	TRUE	Taxol	NA	NA	NA	NA	FALSE	none	234.36	44.96	FALSE	FALSE	TRUE	FALSE
31-2	31	Ovary	Recurrence #1	intra_abdominal	BRCA2	c.5574_5577del	p.Lys1861Ter	IIB	NA	NA	NA	LOH	TRUE	FALSE	FALSE	TRUE	Taxol	NA	NA	NA	NA	FALSE	none	35.52	34.67	FALSE	FALSE	TRUE	FALSE

## Sheet: Normal_tissue_forRNAseq
Sample	Patient	Tissue Origin	Sample Type	Germline Gene Mutated	Germline Mutation (HGVS DNA)	Germline Mutation (HGVS Protein)	History of Cancer	History of Cancer Treatment	Sample + Germline WES	Sample + Germline Targeted Sequencing	Sample RNAseq	Sample in TMA
32-0	32	Breast	Normal Tissue	BRCA1	c.5266dup	p.Gln1756fs	FALSE	FALSE	FALSE	FALSE	TRUE	FALSE
33-0	33	Breast	Normal Tissue	BRCA1	c.68_69del	p.Glu23fs	FALSE	FALSE	FALSE	FALSE	TRUE	FALSE
34-0	34	Breast	Normal Tissue	BRCA1	c.4484G>T	p.Arg1495Met	FALSE	FALSE	FALSE	FALSE	TRUE	FALSE
35-0	35	Breast	Normal Tissue	BRCA2	c.5946del	p.Ser1982fs	FALSE	FALSE	FALSE	FALSE	TRUE	FALSE
36-0	36	Breast	Normal Tissue	BRCA2	c.5609_5610delinsAG	p.Phe1870Ter	FALSE	FALSE	FALSE	FALSE	TRUE	FALSE
37-0	37	Breast	Normal Tissue	BRCA2	c.5946del	p.Ser1982fs	FALSE	FALSE	FALSE	FALSE	TRUE	FALSE
38-0	38	Fallopian tube	Normal Tissue	BRCA1	c.2719_2722del	p.Glu907LysfsTer92	FALSE	FALSE	FALSE	FALSE	TRUE	FALSE
39-0	39	Fallopian tube	Normal Tissue	BRCA1	c.3155del	p.Asn1052Metfs	FALSE	FALSE	FALSE	FALSE	TRUE	FALSE
40-0	40	Fallopian tube	Normal Tissue	BRCA2	c.5946del	p.Ser1982fs	FALSE	FALSE	FALSE	FALSE	TRUE	FALSE
41-0	41	Fallopian tube	Normal Tissue	BRCA2	c.5946del	p.Ser1982fs	FALSE	FALSE	FALSE	FALSE	TRUE	FALSE
42-0	42	Fallopian tube	Normal Tissue	BRCA2	c.4965C>G	p.Tyr1655Ter	FALSE	FALSE	FALSE	FALSE	TRUE	FALSE
43-0	43	Fallopian tube	Normal Tissue	BRCA2	c.1929del	p.Arg645GlufsTer15	FALSE	FALSE	FALSE	FALSE	TRUE	FALSE

## Sheet: PrimaryTumors_forRNAseq
Tumor	Patient	Tumor Type	Sample Type	Germline Mutation Gene	Germline Mutation (HGVS DNA)	Germline Mutation (HGVS Protein)	Tumor Stage at Diagnosis	ER status	Patient Overall Survival (Months)	Patient Age at Diagnosis (Years)	Tumor + germline WES	Tumor + germline targeted sequencing	Tumor RNAseq	Tumor in TMA
81-1	81	Ovary	Primary Tumor	BRCA2	c.1813dup	p.Ile605fs	IIIC	NA	105	63.03	FALSE	FALSE	TRUE	FALSE
57-1	57	Breast	Primary Tumor	BRCA1	c.181T>G	p.Cys61Gly	I	ER-	96	29.29	FALSE	FALSE	TRUE	FALSE
44-1	44	Breast	Primary Tumor	BRCA1	c.2197_2201del	p.Glu733ThrfsTer5	Unknown	Unknown	103	Unknown	FALSE	FALSE	TRUE	FALSE
63-1	63	Breast	Primary Tumor	BRCA2	c.271_272del	p.Tyr91fs	I	ER+	124	33.71	FALSE	FALSE	TRUE	FALSE
47-1	47	Breast	Primary Tumor	BRCA1	c.2934T>G	p.Tyr978Ter	IIA	ER-	100	36.95	FALSE	FALSE	TRUE	FALSE
72-1	72	Ovary	Primary Tumor	BRCA1	c.3668_3671dup	p.Cys1225SerfsTer10	IIC	NA	162	53.37	FALSE	FALSE	TRUE	FALSE
59-1	59	Breast	Primary Tumor	BRCA1	c.3756_3759del	p.Ser1253ArgfsTer10	IIB	ER+	103	39.45	FALSE	FALSE	TRUE	FALSE
66-1	66	Breast	Primary Tumor	BRCA2	c.3847_3848del	p.Val1283fs	I	ER+	87	48.13	FALSE	FALSE	TRUE	FALSE
73-1	73	Ovary	Primary Tumor	BRCA1	c.4035del	p.Glu1346LysfsTer20	IV	NA	39	53.87	FALSE	FALSE	TRUE	FALSE
77-1	77	Ovary	Primary Tumor	BRCA1	c.4158_4162del	p.Ser1387GlufsTer2	IIIC	NA	112	50.1	FALSE	FALSE	TRUE	FALSE
67-1	67	Breast	Primary Tumor	BRCA2	c.4163_4164delinsA	p.Thr1388fs	IIB	ER+	57	40.28	FALSE	FALSE	TRUE	FALSE
60-1	60	Breast	Primary Tumor	BRCA1	c.4186-1787_4357+4122dup	NA	IA	ER+	91	54.23	FALSE	FALSE	TRUE	FALSE
74-1	74	Ovary	Primary Tumor	BRCA1	c.4327C>T	p.Arg1443Ter	IV	NA	15	24.96	FALSE	FALSE	TRUE	FALSE
55-1	55	Breast	Primary Tumor	BRCA1	c.4358-?_5277+?del	NA	IV	ER+	0.5	40.25	FALSE	FALSE	TRUE	FALSE
58-1	58	Breast	Primary Tumor	BRCA1	c.4358-?_5277+?del	NA	IB	ER+	71	32.9	FALSE	FALSE	TRUE	FALSE
56-1	56	Breast	Primary Tumor	BRCA1	c.442-?_547+?del	NA	IIB	ER-	121	52.43	FALSE	FALSE	TRUE	FALSE
79-1	79	Ovary	Primary Tumor	BRCA1	c.5074+1G>A	NA	IIIC	NA	138	54.58	FALSE	FALSE	TRUE	FALSE
45-1	45	Breast	Primary Tumor	BRCA1	c.5074+1G>T	NA	I	ER+	137	41.2	FALSE	FALSE	TRUE	FALSE
54-1	54	Breast	Primary Tumor	BRCA1	c.5074G>C	p.Asp1692fs;Val1665fs	IA	ER-	117	57.49	FALSE	FALSE	TRUE	FALSE
49-1	49	Breast	Primary Tumor	BRCA1	c.5123C>A	p.Ala1708Glu	III	ER-	175	42.45	FALSE	FALSE	TRUE	FALSE
78-1	78	Ovary	Primary Tumor	BRCA1	c.5266dup	p.Gln1756ProfsTer74	IIIC	NA	57	57.63	FALSE	FALSE	TRUE	FALSE
65-1	65	Breast	Primary Tumor	BRCA2	c.5645C>G	p.Ser1882Ter	I	ER-	75	49.56	FALSE	FALSE	TRUE	FALSE
82-1	82	Ovary	Primary Tumor	BRCA2	c.5682C>G	p.Tyr1894Ter	IV	NA	138	51.81	FALSE	FALSE	TRUE	FALSE
83-1	83	Ovary	Primary Tumor	BRCA2	c.5946del	p.Ser1982fs	IB	NA	78	52.74	FALSE	FALSE	TRUE	FALSE
85-1	85	Ovary	Primary Tumor	BRCA2	c.5946del	p.Ser1982fs	IIIC	NA	71	73.92	FALSE	FALSE	TRUE	FALSE
46-1	46	Breast	Primary Tumor	BRCA1	c.68_69del	p.Glu23fs	IA	ER-	110	52.99	FALSE	FALSE	TRUE	FALSE
48-1	48	Breast	Primary Tumor	BRCA1	c.68_69del	p.Glu23fs	I	ER-	134	38.16	FALSE	FALSE	TRUE	FALSE
50-1	50	Breast	Primary Tumor	BRCA1	c.68_69del	p.Glu23fs	II	ER-	159	46.26	FALSE	FALSE	TRUE	FALSE
51-1	51	Breast	Primary Tumor	BRCA1	c.68_69del	p.Glu23fs	II	ER+	142	34.82	FALSE	FALSE	TRUE	FALSE
52-1	52	Breast	Primary Tumor	BRCA1	c.68_69del	p.Glu23fs	IIA	ER-	132	52.12	FALSE	FALSE	TRUE	FALSE
53-1	53	Breast	Primary Tumor	BRCA1	c.68_69del	p.Glu23fs	II	ER-	126	41.16	FALSE	FALSE	TRUE	FALSE
69-1	69	Ovary	Primary Tumor	BRCA1	c.68_69del	p.Glu23fs	IIIB	NA	Unknown	49.88	FALSE	FALSE	TRUE	FALSE
70-1	70	Ovary	Primary Tumor	BRCA1	c.68_69del	p.Glu23fs	IIIC	NA	89	61.46	FALSE	FALSE	TRUE	FALSE
71-1	71	Ovary	Primary Tumor	BRCA1	c.68_69del	p.Glu23fs	Unknown	NA	Unknown	Unknown	FALSE	FALSE	TRUE	FALSE
75-1	75	Ovary	Primary Tumor	BRCA1	c.68_69del	p.Glu23fs	IIIC	NA	124	58.87	FALSE	FALSE	TRUE	FALSE
76-1	76	Ovary	Primary Tumor	BRCA1	c.68_69del	p.Glu23fs	IIIB	NA	33	57.18	FALSE	FALSE	TRUE	FALSE
80-1	80	Ovary	Primary Tumor	BRCA1	c.68_69del	p.Glu23fs	IIIC	NA	106	57.09	FALSE	FALSE	TRUE	FALSE
68-1	68	Breast	Primary Tumor	BRCA2	c.7673_7674del	p.Glu2558fs	I	ER+	96	41.95	FALSE	FALSE	TRUE	FALSE
64-1	64	Breast	Primary Tumor	BRCA2	c.8364G>A	p.Trp2788Ter	IIB	ER+	103	35.51	FALSE	FALSE	TRUE	FALSE
61-1	61	Breast	Primary Tumor	BRCA2	c.8487+1G>A	p.Ile2778_Gln2829del	IIB	ER-	239	38.83	FALSE	FALSE	TRUE	FALSE
62-1	62	Breast	Primary Tumor	BRCA2	c.8904del	p.Val2969fs	IA	ER+	24	54.43	FALSE	FALSE	TRUE	FALSE
84-1	84	Ovary	Primary Tumor	BRCA2	c.8954-1_8955delinsAA	p.Val2985fs	IIIC	NA	191	69.96	FALSE	FALSE	TRUE	FALSE

## Sheet: Glossary
Term	Definition
WES	Whole exome sequencing
Targeted sequencing	High-depth targeted sequencing using custom panel (see Supp. Table 1)
RNAseq	RNA sequencing
Tumor/Sample in TMA	Tumor in tissue microarray used for CODEX and PARP1 IHC
LOH status	Loss of heterozygosity; somatic biallelic BRCA1/2 loss
PARPi	poly(ADP-ribose) polymerase inhibitor
Platinums	platinum-based chemotherapy
"0" sample	normal tissue (i.e., 34-0 is normal tissue from patient 34)
"1" sample	primary tumor (i.e., 1-1 is primary tumor from patient 1)
"2" sample, "3" sample, etc.	successive recurrences from the same patient, in chronological order (i.e., 1-2 is the first recurrence collected from patient 1)
ER status	Estrogen receptor status
PR status	Progesterone receptor status
HER2 status	HER2/ERBB2 status
Other treatment exposure	Any cancer treatment to which the tumor was exposed, if not already captured by other categories
Overall Survival	Time from diagnosis to death or last follow-up, in months
