# Supplementary material for: Analysis of matched primary and recurrent BRCA1/2 mutation-associated tumors identifies recurrence-specific drivers
Source: Research Square preprint supplement (doi:10.21203/rs.3.rs-745248/v1), 2021-08-30
Supplement: Supplementary file 9 [file a358ce0e8d741bc43cc1b5ba.xlsx]

## Sheet: PrimaryTumors_MutSigCV
gene	expr	reptime	hic	N_nonsilent	N_silent	N_noncoding	n_nonsilent	n_silent	n_noncoding	nnei	x	X	p	q
TP53	2069567	213	34	83403	23031	0	22	0	0	50	26	1399275	1.169e-07	0.00220496
BAGE2	NaN	NaN	NaN	22923	6561	0	11	0	0	50	49	3013389	7.72613e-07	0.00728652
HLA-DRB5	1070559	595	14	52110	14553	0	9	0	0	50	12	1723113	0.000143131	0.873737
GYPB	146672	990	-12	18657	5157	0	5	0	0	50	12	1478034	0.00018529	0.873737
RHPN2	458398	356	-12	134217	37422	0	13	1	0	50	20	1652643	0.000727281	1
USP8	325514	203	30	220806	57267	0	20	0	0	18	11	853713	0.000927602	1
OR2J3	155147	738	1	57645	18090	0	7	0	0	23	2	790749	0.00274502	1
KRTAP4-9	NaN	NaN	NaN	40743	10530	0	5	0	0	50	49	3017358	0.00327178	1
DDX11	335562	591	-4	196425	48357	0	20	2	0	50	22	1187001	0.00693169	1
FCGR2A	741254	448	41	62667	16713	0	10	0	0	5	2	170532	0.00886092	1
IER3IP1	148377	504	8	16146	4833	0	4	0	0	50	16	1728297	0.0125053	1
LEAP2	686574	200	66	15417	4347	0	3	0	0	50	19	1216431	0.0155132	1
FRG2B	50016	525	-16	53838	15012	0	6	0	0	50	28	1810053	0.018219	1
RETNLB	129526	941	-3	22059	5967	0	2	0	0	50	10	1567242	0.0193263	1
PRM2	632841	308	37	19980	5373	0	4	0	0	50	36	1663821	0.0215738	1
UGT2B11	18988	929	1	103680	26892	0	4	0	0	50	8	1897857	0.021811	1
SNX29	477277	758	18	85536	22923	0	6	0	0	50	6	1343574	0.0236027	1
C5orf60	NaN	NaN	NaN	52974	16362	0	4	0	0	50	49	3023190	0.024105	1
TMEM37	203559	497	35	35505	11394	0	4	0	0	50	20	1577880	0.0242837	1
NCBP2	754196	306	29	31401	7884	0	4	0	0	50	18	1810539	0.0245605	1
RHOG	425863	258	23	35856	11124	0	4	0	0	50	14	1505223	0.0298826	1
PRR23B	336415	520	11	47331	17307	0	5	1	0	21	6	646947	0.0300842	1
VCX	43100	NaN	-9	39933	10692	0	3	0	0	50	22	2209329	0.0303133	1
NBPF10	NaN	NaN	NaN	712881	177633	0	30	5	0	50	54	3184461	0.0318162	1
PRAMEF1	141239	571	18	90558	26001	0	8	1	0	50	21	1334907	0.0325163	1
CBWD1	230380	398	-4	84213	20763	0	5	0	0	50	15	1589868	0.0327828	1
DEFB126	215351	430	25	21789	6075	0	2	0	0	50	16	1310067	0.0328736	1
HRASLS	141065	851	-4	32886	8991	0	3	0	0	50	25	1439478	0.0329106	1
RAB22A	841935	330	18	39096	10233	0	4	0	0	50	22	1433484	0.0331434	1
S100A7	1140114	279	38	20925	4671	0	2	0	0	50	27	1353699	0.0335828	1
TMEM196	187539	874	-4	33264	9909	0	3	0	0	50	20	1399977	0.0337066	1
ATG5	181529	390	32	56187	13149	0	3	0	0	50	11	1759779	0.0343584	1
RIT1	2096440	179	32	43416	11664	0	6	1	0	50	29	1407564	0.0345192	1
KCTD7	615008	246	43	55377	16389	0	10	2	0	11	7	300348	0.0348207	1
ANAPC10	182708	1139	20	37098	9396	0	3	0	0	50	13	1631070	0.0366973	1
ZNF740	1729009	191	55	39150	9612	0	4	0	0	50	17	1386612	0.0383883	1
BAX	1927185	211	43	48708	14634	0	5	0	0	50	27	1559520	0.0386801	1
OR11H12	141957	747	-11	61344	17955	0	3	0	0	50	13	1747251	0.0387255	1
SAMD7	400118	622	17	86589	24300	0	4	1	0	50	17	1533357	0.0394215	1
CERCAM	1928973	188	64	114156	34398	0	6	0	0	50	14	1802277	0.0395832	1
OCM2	451365	522	25	22491	5211	0	2	0	0	50	13	1797984	0.0410795	1
C11orf86	NaN	NaN	NaN	21789	6885	0	2	0	0	50	49	3013713	0.0421193	1
OR4A16	1067	1102	-42	61803	17982	0	4	0	0	50	8	1511244	0.042322	1
C7orf33	473795	593	-4	33426	10476	0	2	0	0	50	13	1568970	0.0430857	1
ACSM2A	181483	823	6	113130	31536	0	8	0	0	17	7	513405	0.043753	1
OR10Z1	179404	940	1	57834	18387	0	3	0	0	40	9	1380753	0.044752	1
TSEN15	372562	761	8	35235	9315	0	2	0	0	50	22	1883358	0.0459335	1
BCL2L10	540700	195	21	37503	12798	0	2	0	0	50	15	1433484	0.0461273	1
CNTF	284768	644	2	38367	10962	0	4	0	0	50	26	1383723	0.0470475	1
GJB3	548013	580	19	50706	15471	0	4	0	0	50	12	1333125	0.047665	1
CARD17	NaN	NaN	NaN	21843	6102	0	2	0	0	50	49	3012930	0.0481849	1
RASGEF1B	9755	972	9	96309	23085	0	5	0	0	50	26	2305584	0.0484929	1
ADORA1	469029	453	37	61155	18954	0	5	0	0	50	20	1496367	0.0489432	1
GCG	95439	554	7	36801	8802	0	2	0	0	50	14	1533087	0.0490315	1
SLC25A12	443171	185	35	133083	37584	0	7	0	0	50	31	1644435	0.0490349	1
S1PR2	1729517	200	31	63936	22410	0	6	0	0	50	37	1821744	0.0491999	1
TAS2R46	371136	676	4	58833	16497	0	4	1	0	50	24	1541538	0.0498748	1
CMPK2	41287	1132	-4	83079	27567	0	3	0	0	50	5	1719792	0.0504284	1
CLK4	492630	675	17	98415	22437	0	5	0	0	50	24	1702242	0.0506711	1
NBPF15	NaN	NaN	NaN	135135	32778	0	5	1	0	50	50	3039606	0.0510185	1
INHBB	218512	446	15	75222	24408	0	4	0	0	50	17	1662903	0.0513607	1
RND3	53679	438	5	48654	12501	0	2	0	0	50	8	1383507	0.0514031	1
TMEM200B	598249	235	19	53784	21384	0	4	0	0	50	16	1395711	0.0514384	1
TRIM48	981	1138	-38	45441	10935	0	3	0	0	50	16	1606959	0.0519408	1
OR2T4	104321	936	-39	65907	18900	0	4	0	0	50	7	1383291	0.0536325	1
CXXC4	18498	982	18	37557	11286	0	2	0	0	50	16	1685178	0.0541304	1
PPARGC1A	19326	405	2	156357	41688	0	4	0	0	33	1	915948	0.054289	1
KRTAP6-2	22916	1048	-79	12069	3159	0	1	0	0	50	21	1233036	0.0543155	1
PCGF5	190999	410	3	52785	12258	0	2	0	0	50	14	1601613	0.0548689	1
RBMX	275533	NaN	28	84699	17766	0	4	0	0	50	16	1630611	0.0549352	1
KIF22	NaN	NaN	NaN	127008	39366	0	8	0	0	50	49	3046194	0.0562481	1
SLC25A29	412002	237	37	55080	19764	0	4	1	0	50	19	1467288	0.0588236	1
LHCGR	75021	934	-16	134757	38745	0	5	0	0	50	24	1637928	0.058972	1
SPRY3	NaN	NaN	NaN	53919	16308	0	3	0	0	50	49	3023136	0.0593664	1
C5orf52	NaN	NaN	NaN	30942	8748	0	2	0	0	50	49	3015576	0.061078	1
VSNL1	135361	1255	-2	38556	9072	0	2	0	0	50	9	1354077	0.0612792	1
KIT	92734	649	0	193563	50490	0	6	1	0	46	9	1493370	0.0613208	1
DBNDD2	1037999	382	35	35451	10071	0	3	0	0	50	24	1321785	0.061612	1
EXOSC8	176745	650	16	56133	14580	0	2	1	0	50	19	1463319	0.0616497	1
FAM20B	352872	244	1	79029	22545	0	5	0	0	50	29	1914570	0.0622366	1
MAP1LC3B2	292439	337	1	24300	6561	0	2	0	0	50	23	1845126	0.0638712	1
TRIM32	68232	682	-15	121797	37692	0	6	0	0	50	28	2214756	0.0643374	1
DIRAS2	94332	706	13	38664	10260	0	3	0	0	50	18	1501929	0.064699	1
PDCD6	935283	530	28	38691	9747	0	4	0	0	50	31	1372356	0.064895	1
FOXD4L1	528113	595	15	73683	25704	0	4	0	0	50	17	1502037	0.0651773	1
POLG2	1306314	184	23	94581	26109	0	5	0	0	50	23	1802898	0.0656436	1
MYOG	430455	453	42	42444	12879	0	3	1	0	50	20	1492452	0.0657252	1
SLC25A1	487560	277	18	59994	18414	0	3	0	0	50	16	1517022	0.0663097	1
SIRPB1	421731	424	39	146367	44631	0	7	2	0	50	31	1668978	0.0665114	1
POMC	319647	280	37	50895	14877	0	4	0	0	50	18	1397763	0.0670277	1
C1orf54	1213150	197	38	27108	6750	0	2	0	0	50	22	1598130	0.0672765	1
CETN2	201810	NaN	-3	35316	8181	0	2	0	0	50	13	1229715	0.0677055	1
LIN37	1151198	321	30	49707	13230	0	3	0	0	28	7	884844	0.0689163	1
PPT1	873408	387	23	61209	15984	0	3	0	0	50	30	2110887	0.0699035	1
CRIPAK	1018381	507	41	81540	27081	0	7	1	0	50	47	1854738	0.0700138	1
VCX3B	28829	NaN	-28	42417	10962	0	2	0	0	50	30	1898046	0.0702871	1
NPPA	519155	207	43	28944	8802	0	2	0	0	50	26	1418688	0.0707723	1
VPREB1	433352	612	35	28107	7857	0	2	0	0	50	24	1682991	0.0708272	1
HLA-A	983517	596	36	70983	20385	0	5	0	0	50	30	1391580	0.0710255	1
C8G	1979517	188	34	39366	12069	0	3	0	0	50	35	1596213	0.0713841	1
OR8K5	10101	1007	-38	58050	16713	0	2	0	0	50	17	1736694	0.071662	1
SPR	450159	421	23	47925	16551	0	3	0	0	50	15	1788831	0.0723376	1
MYF5	27810	974	-1	48897	13959	0	2	0	0	50	9	1538865	0.0728135	1
QSER1	408746	172	23	331290	94122	0	7	0	0	34	8	1490454	0.0733556	1
CLRN2	271399	912	37	44253	13338	0	3	0	0	50	17	1335042	0.0735176	1
EIF2B4	1245306	182	52	105867	33129	0	4	0	0	50	12	1717038	0.0740022	1
SGSH	674340	219	22	96201	28620	0	8	1	0	50	41	1903824	0.0744597	1
ORM1	206775	425	4	40419	10287	0	2	0	0	50	16	1416690	0.0745057	1
ZBTB34	367308	322	48	95553	26514	0	5	1	0	50	17	1647837	0.0746759	1
GUCA1A	524386	273	43	40014	10044	0	3	0	0	50	27	1688823	0.0747835	1
TAS2R30	371136	676	4	60345	17415	0	3	1	0	50	24	1541538	0.0752812	1
PRAMEF4	118495	792	12	91503	25866	0	3	2	0	50	18	1383696	0.0759974	1
OR52E2	97256	1024	-11	60939	18198	0	2	0	0	50	15	1920699	0.0760247	1
OR2W3	87551	993	-35	57402	18981	0	2	0	0	50	17	1838376	0.0764001	1
PAPD4	260678	684	28	97659	24732	0	5	0	0	50	19	1539540	0.0771079	1
USE1	865138	212	38	51084	14688	0	4	0	0	50	30	1430757	0.0775207	1
ABHD5	103561	437	33	68175	18819	0	3	0	0	50	19	1868265	0.0776997	1
FGF18	300840	347	30	40446	11394	0	4	0	0	50	20	1523583	0.0805879	1
OR4C3	278638	642	-40	61155	18873	0	3	0	0	22	16	868050	0.0809202	1
MMP13	374035	482	-10	93987	23787	0	5	0	0	50	27	1896561	0.0811253	1
BCLAF1	286851	153	21	179469	47898	0	5	1	0	50	18	1958904	0.081217	1
ZNF273	217076	1017	-15	111645	27999	0	5	1	0	50	16	1495422	0.0813184	1
OR5H1	200002	811	-15	59022	17118	0	5	2	0	19	7	472068	0.0814275	1
PSME1	974559	220	41	56592	14202	0	3	0	0	50	33	1863135	0.081804	1
C20orf112	677178	310	61	83970	24489	0	7	1	0	50	22	1323432	0.082149	1
GXYLT1	172471	684	-9	86670	22761	0	4	0	0	50	25	2249019	0.0830474	1
C1orf51	1213150	197	38	72657	22437	0	4	0	0	50	22	1598130	0.0830872	1
ENPP2	255492	552	7	190539	46710	0	9	2	0	50	23	1710369	0.0833167	1
TGIF2LX	8315	NaN	-35	46089	13203	0	2	0	0	50	17	1828710	0.084536	1
PPP1CA	1269888	177	51	66744	18306	0	3	0	0	50	11	1569861	0.0846132	1
FAM136A	671278	370	38	27864	6723	0	2	0	0	13	7	482004	0.084848	1
CEACAM6	1341589	499	16	65610	19845	0	4	0	0	50	15	1478655	0.0852065	1
NSUN3	85578	1378	-9	66393	18090	0	3	0	0	50	17	1830573	0.085219	1
CST7	545344	676	-29	28593	7857	0	2	0	0	50	22	1460052	0.0852403	1
RDH11	479937	260	39	61587	18036	0	3	0	0	50	18	1352943	0.0860381	1
ZBTB8B	NaN	NaN	NaN	94905	26595	0	5	0	0	50	49	3033423	0.0860751	1
PELI3	1941577	194	51	87966	28431	0	6	1	0	50	25	1526067	0.0861979	1
CEPT1	388536	627	27	81378	22545	0	2	0	0	50	14	2216295	0.0864896	1
TUBG1	1884163	177	38	88479	24597	0	4	0	0	50	26	1807083	0.0872428	1
SULT1A2	1141256	269	53	59103	15255	0	9	2	0	8	3	127683	0.0878421	1
UNC119B	1741363	349	42	48816	13716	0	4	0	0	50	34	1428030	0.0878511	1
CYB5A	152675	989	26	28539	6777	0	1	0	0	50	13	1465290	0.0885548	1
WDR37	334592	460	42	97281	27216	0	7	0	0	50	25	1498878	0.0888834	1
TBCE	531741	178	21	105327	28161	0	6	1	0	50	18	1464048	0.0891397	1
HIGD1C	569122	220	40	19332	5049	0	1	0	0	50	28	1512567	0.0892032	1
C5orf58	97631	636	31	20898	5103	0	1	0	0	50	20	1815156	0.0893335	1
TAS2R41	371260	379	1	57564	17280	0	2	0	0	50	13	1538622	0.0895942	1
TRAPPC2L	860087	252	37	28512	7209	0	3	0	0	50	34	1857330	0.0895992	1
CYP2A13	1004808	354	10	96201	26838	0	6	0	0	23	3	470502	0.0897614	1
CYP19A1	263003	535	17	99927	25461	0	4	0	0	50	21	1761129	0.0899905	1
SLC16A6	764688	237	11	99792	29160	0	5	0	0	50	24	1648134	0.0910535	1
MMP27	530224	567	-10	102168	25974	0	3	0	0	50	9	1303263	0.0911286	1
PAG1	185952	441	18	84132	23031	0	4	0	0	50	22	1428219	0.0916303	1
GBAS	760564	642	11	58401	14418	0	3	0	0	50	23	1747764	0.0917545	1
CIDEB	915114	220	38	42093	12987	0	2	0	0	50	21	1598589	0.0919042	1
ZNF678	606105	575	-6	114966	27189	0	4	1	0	43	4	1252044	0.0919529	1
GRXCR1	32225	966	18	56052	15633	0	2	0	0	50	11	1554255	0.0925403	1
CCNH	125767	837	8	65070	16254	0	2	0	0	50	16	1649538	0.0927721	1
IRF8	407770	461	27	83349	22923	0	2	0	0	50	17	1944891	0.0929144	1
PDSS1	339802	540	18	82080	22734	0	4	0	0	50	19	1975050	0.0931595	1
ALDOB	112947	898	-22	71145	20142	0	3	0	0	50	20	1636524	0.0934766	1
CITED1	370863	NaN	50	41202	13068	0	3	1	0	41	31	1238355	0.0934837	1
TP53AIP1	195815	580	-2	20439	6372	0	1	0	0	50	12	1458486	0.0935738	1
MGST3	321831	408	0	30186	8613	0	1	0	0	50	17	1660230	0.0945859	1
ZDHHC17	181943	605	-12	127656	31347	0	4	0	0	50	7	1512918	0.094973	1
GJB4	548013	580	19	49545	15336	0	2	1	0	50	12	1333125	0.0956636	1
YTHDC1	126481	485	0	145449	36639	0	6	0	0	40	15	1357803	0.0957315	1
LINGO1	400940	503	38	114210	37179	0	7	1	0	50	18	1426707	0.0958584	1
JRK	384374	412	23	111294	34425	0	6	0	0	50	22	1773765	0.0961113	1
KCNA4	30326	940	-38	123525	35397	0	4	0	0	50	9	1441881	0.0961134	1
RCOR2	1321109	201	51	100170	30726	0	4	0	0	50	19	1573236	0.0964417	1
IFI27L1	200295	605	47	20439	6696	0	2	0	0	50	28	1459566	0.0964799	1
ZNF133	575071	471	-1	125712	34506	0	5	2	0	50	11	1328724	0.0967752	1
C1orf192	751212	293	30	34533	10179	0	2	0	0	50	23	1674324	0.0967786	1
CALML3	769552	446	17	28458	7992	0	4	1	0	15	6	325323	0.0968694	1
MBD3L3	NaN	NaN	NaN	38880	12393	0	2	1	0	29	20	1122363	0.0970621	1
HTATIP2	168576	547	-6	60075	17685	0	2	1	0	50	12	1520775	0.0972364	1
MBNL1	194580	402	27	84699	21168	0	4	0	0	50	15	1481706	0.0972972	1
AKR1B10	403585	319	21	63612	16335	0	3	0	0	50	13	1750788	0.0976664	1
RGS16	597206	812	-3	39690	10935	0	2	0	0	50	17	1702620	0.0980127	1
NFKBID	1060028	321	47	58779	20115	0	4	0	0	50	25	1463589	0.0985922	1
FGF9	298481	648	37	40095	11340	0	2	0	0	50	15	1333071	0.0989436	1
BTN2A1	384310	375	47	103275	29322	0	4	0	0	50	8	1315656	0.0996181	1
FSCN3	411207	619	-7	95688	27351	0	3	0	0	50	10	1141317	0.09985	1
FOS	855880	154	51	71064	22491	0	7	2	0	13	8	442827	0.099894	1
TRA2A	432206	231	23	54567	16470	0	2	0	0	50	11	1384533	0.0999016	1
DYNLL1	1552470	216	46	18630	4212	0	2	0	0	50	55	1688769	0.100392	1
CALML4	375804	365	28	39042	10125	0	2	0	0	50	18	1474335	0.100395	1
CERK	404043	265	-1	106029	28593	0	4	0	0	50	27	1851093	0.100507	1
S100PBP	1179496	180	20	80217	21681	0	3	0	0	50	20	1435833	0.101333	1
WNT2	331093	392	5	70281	18738	0	2	0	0	50	15	1620999	0.101421	1
CLUL1	449991	486	23	94365	22032	0	3	1	0	50	23	1695789	0.101523	1
CELF1	1011926	219	40	103329	26352	0	5	1	0	50	28	1806354	0.101722	1
HACL1	433102	235	32	115182	30699	0	4	1	0	39	8	1167696	0.10208	1
TRIM74	826724	337	62	48411	13878	0	2	0	0	50	25	1314279	0.102858	1
NME6	1054170	263	37	38394	10773	0	2	0	0	50	32	1378755	0.10311	1
CMAS	605789	955	-13	84672	23463	0	4	0	0	50	15	1424385	0.103539	1
TRIM64B	NaN	NaN	NaN	88263	22707	0	3	0	0	50	49	3029535	0.103756	1
GPAM	166177	679	-13	163593	44334	0	6	0	0	50	21	2049219	0.104087	1
NMNAT2	769970	465	13	66582	17334	0	4	1	0	50	27	1233927	0.104569	1
IFT52	370278	303	11	88317	22329	0	3	0	0	50	21	1689174	0.104633	1
CD274	348920	629	23	57915	14742	0	2	1	0	50	14	1646919	0.104771	1
PROK2	86859	605	6	25353	7209	0	1	0	0	50	13	1572939	0.105135	1
TAS2R14	363803	644	2	59886	17307	0	3	0	0	50	23	1560249	0.10524	1
NARS2	302979	569	17	94635	25731	0	3	0	0	50	21	2130030	0.105699	1
LYPD1	46944	848	8	27729	7425	0	1	0	0	50	14	1805436	0.105989	1
NAA38	72287	922	-13	19305	5238	0	1	0	0	50	19	1925019	0.106165	1
LPAR4	16059	NaN	22	69903	20574	0	2	0	0	50	20	1543968	0.106507	1
EFR3A	99296	999	6	163863	43011	0	6	0	0	32	8	1124658	0.106639	1
OTOP1	178901	584	34	115074	35667	0	6	0	0	17	5	585090	0.106849	1
C1QTNF1	592461	285	15	54621	14877	0	2	0	0	50	11	1531737	0.107012	1
WDR73	341520	263	32	73116	21411	0	4	0	0	50	23	1587654	0.10712	1
PGAM4	549429	NaN	24	48033	13932	0	2	0	0	50	15	1414962	0.10714	1
TMEM70	258047	417	25	49707	15174	0	2	0	0	50	14	1307367	0.107179	1
IFI44L	161560	636	-13	89640	23031	0	2	0	0	50	8	1585089	0.10755	1
PPP1R3B	159748	526	23	55485	14337	0	2	0	0	50	13	1567053	0.10773	1
PVRL4	689033	250	23	96012	30753	0	4	0	0	50	31	1446363	0.107921	1
PPHLN1	174675	545	14	104463	27729	0	4	0	0	50	25	1829466	0.108076	1
INSIG2	190880	537	8	43686	12528	0	2	0	0	50	23	1962495	0.108094	1
KRT8	1781225	288	27	93555	26406	0	5	0	0	50	31	1430973	0.108318	1
OR4C16	1141	1100	-37	58833	16578	0	2	0	0	50	16	1494288	0.108486	1
GATM	465759	445	4	83322	22302	0	2	0	0	50	6	1397682	0.108654	1
MUT	64105	1139	-14	145584	40797	0	5	1	0	50	24	2021382	0.108862	1
THRAP3	742773	170	31	183843	51705	0	11	0	0	42	22	1270134	0.109253	1
DGCR14	487560	277	18	91800	27189	0	4	0	0	50	16	1517022	0.109408	1
GBE1	54244	720	0	140265	35424	0	4	0	0	50	8	1494504	0.109665	1
TSKU	287129	214	42	63018	23328	0	7	1	0	50	32	1380348	0.10983	1
TFCP2L1	240173	568	9	96012	25326	0	4	0	0	50	19	1700568	0.109954	1
MYC	406323	204	23	86184	25029	0	3	1	0	50	13	1646352	0.110201	1
CDK18	679311	268	34	99549	28026	0	5	0	0	50	23	1567917	0.110503	1
POLR3G	84917	780	16	47115	9585	0	2	0	0	50	21	1526121	0.110912	1
CDK15	391799	588	32	77031	20736	0	3	0	0	50	19	1638090	0.111403	1
GNAT3	118115	385	-32	71145	17226	0	2	0	0	50	12	1654722	0.112159	1
FAM167A	483148	520	43	40203	12366	0	2	0	0	50	22	1628046	0.112221	1
GJA3	405200	472	50	80298	25974	0	4	2	0	31	17	991818	0.112767	1
OR2M5	19998	935	-32	58509	17469	0	2	0	0	50	15	1430568	0.112911	1
BRIP1	326357	412	-9	245970	63936	0	7	1	0	50	28	1803357	0.113194	1
IMMP1L	124843	916	-4	33561	8802	0	1	0	0	50	10	1383804	0.113822	1
NDST2	1009357	191	42	167670	51030	0	6	1	0	50	17	1862946	0.114877	1
VCP	782447	350	42	156519	44766	0	6	1	0	32	19	1187352	0.115431	1
SLAMF8	802263	403	6	54216	16578	0	4	0	0	50	29	1185516	0.115479	1
HLA-DRB1	1074109	595	29	51786	14877	0	3	0	0	50	31	1376244	0.115548	1
ZNF565	950699	326	-10	98226	24570	0	5	0	0	50	22	1335447	0.115591	1
MED31	663953	424	9	26973	6075	0	2	0	0	50	23	1388259	0.116136	1
IL1R1	232947	522	20	113292	28458	0	4	1	0	50	17	1638063	0.116181	1
TM9SF1	974559	220	41	116856	35586	0	6	1	0	50	33	1863135	0.117196	1
GOSR2	618151	366	28	53433	13878	0	2	0	0	50	19	1542024	0.117547	1
TMEM54	1019374	232	15	41904	13905	0	2	0	0	50	21	1601613	0.117922	1
DYRK1A	314682	366	47	155466	40797	0	5	0	0	50	12	1471203	0.118006	1
RXRG	291474	623	-10	93501	26622	0	3	0	0	50	23	1585899	0.118169	1
FAM83C	1290513	170	45	136431	46305	0	6	0	0	49	21	1753650	0.118268	1
ANKRD20A4	NaN	NaN	NaN	164835	39933	0	7	3	0	29	22	1149903	0.118813	1
FAM46C	344088	557	16	74439	21141	0	3	0	0	50	19	1969839	0.118886	1
C9orf64	460176	343	2	65691	18387	0	3	0	0	50	15	1424952	0.118956	1
FAM102A	1604109	201	61	74736	22059	0	3	0	0	50	24	1508679	0.118994	1
SLC2A2	167361	735	18	101439	29376	0	3	1	0	50	20	1608795	0.119058	1
HRASLS5	887496	459	31	55458	14202	0	2	0	0	50	26	1710207	0.120284	1
RBM23	1177534	225	34	86319	24813	0	8	0	0	50	34	1226799	0.120389	1
IL1RAP	139316	398	0	159219	42552	0	4	0	0	46	17	1732050	0.120514	1
C9orf78	600401	187	44	58860	14364	0	2	1	0	50	32	1624536	0.120518	1
CTHRC1	428438	615	23	46467	13959	0	3	0	0	50	16	1224882	0.12057	1
GCHFR	1011507	172	46	16794	4671	0	1	0	0	50	29	1756107	0.120794	1
PABPC3	436184	650	30	118665	35073	0	12	4	0	10	4	185679	0.120863	1
CTRB2	612638	171	16	51003	15417	0	2	0	0	50	20	1474659	0.120873	1
DDA1	842088	211	43	20979	5346	0	2	0	0	50	33	1641222	0.120961	1
GJA4	548013	580	19	61452	20034	0	2	0	0	50	12	1333125	0.121211	1
PRPS1	226650	NaN	57	62208	17253	0	2	0	0	50	16	1837350	0.121263	1
APEX1	464497	395	17	61074	17739	0	3	0	0	50	29	1621944	0.121421	1
ZSCAN1	1187584	694	-42	76707	23652	0	4	0	0	32	9	852066	0.121559	1
OR13C5	147494	920	-31	59859	17496	0	2	0	0	50	22	1518156	0.121819	1
DYNLRB2	149480	465	-30	19710	4995	0	1	0	0	50	24	1731051	0.122145	1
SRRM5	NaN	NaN	NaN	138942	38043	0	6	1	0	50	50	3044871	0.122274	1
H3F3C	271605	394	20	24921	8289	0	4	1	0	5	7	236925	0.122649	1
IL10RB	861800	317	87	64935	16389	0	3	0	0	50	30	1724733	0.122776	1
SATB1	67460	883	-6	148419	40473	0	6	0	0	50	19	1760238	0.123117	1
LTB4R	915114	220	38	62424	23679	0	3	1	0	50	21	1598589	0.123378	1
PAPOLA	328369	576	19	148419	39663	0	3	0	0	50	12	1990602	0.123567	1
FOXD4L6	NaN	NaN	NaN	75978	25596	0	2	0	0	50	49	3032424	0.124034	1
PRR15L	1183803	203	21	19980	5616	0	1	0	0	50	18	1620972	0.124363	1
BEND5	25250	886	-8	82026	22464	0	2	0	0	50	22	2258415	0.12463	1
PTTG1IP	690574	213	62	36045	9558	0	2	0	0	50	18	1227393	0.12475	1
CLEC3A	44717	1261	-26	38745	10179	0	2	0	0	50	25	1561005	0.125135	1
GRM8	60921	1082	-8	178254	49761	0	4	0	0	50	10	1798686	0.125459	1
OR5H14	200002	811	-15	58806	16767	0	2	0	0	50	17	1599399	0.125789	1
SGIP1	116994	601	-8	162810	46413	0	4	0	0	50	9	1500012	0.126226	1
SIGLEC10	393294	583	17	132381	40473	0	4	0	0	22	5	1044549	0.126295	1
FRK	230837	693	-4	99468	25758	0	3	0	0	50	12	1527984	0.127027	1
OR6T1	107524	830	-5	59184	19467	0	2	0	0	50	20	1490751	0.127065	1
FLRT2	18925	671	-45	123309	37314	0	7	1	0	26	12	1381374	0.127213	1
EFHC1	396934	431	34	126441	33210	0	4	0	0	50	18	1516617	0.127363	1
SERTAD2	632067	332	25	58833	18036	0	3	0	0	50	34	1978803	0.127441	1
LSG1	370452	255	34	130842	33507	0	5	1	0	50	17	1437129	0.127577	1
NPBWR2	1032302	312	51	59994	21087	0	3	1	0	50	34	1580850	0.127639	1
FANCL	197920	617	9	79920	19548	0	3	0	0	50	29	1646433	0.127939	1
FOXJ2	139049	167	22	111510	31455	0	4	1	0	50	15	1636902	0.128061	1
PPP3R2	112839	1008	-11	33723	8721	0	1	0	0	50	10	1669302	0.128433	1
TCEAL2	132641	NaN	4	44982	10746	0	1	0	0	50	7	1313712	0.128511	1
GNB2	1884430	247	60	66798	18981	0	3	0	0	50	18	1742715	0.128575	1
RALY	873171	398	61	59184	18009	0	4	2	0	20	9	603801	0.128662	1
WWOX	51599	1260	-34	84699	23598	0	3	0	0	50	15	1928691	0.128755	1
PSEN2	428197	373	1	87264	25083	0	3	1	0	50	10	1347273	0.128932	1
ZXDB	80578	NaN	-18	147852	47520	0	6	3	0	46	26	1601397	0.129916	1
ADRBK1	1369264	177	44	138240	35910	0	5	1	0	44	14	1425546	0.130145	1
TTC33	211936	496	-11	51624	13500	0	2	0	0	50	30	1555173	0.130422	1
NR2C2	483299	400	43	120825	33399	0	3	0	0	50	13	1451682	0.130725	1
ANKRD13D	1369264	177	44	117234	34560	0	4	0	0	50	18	1810296	0.130925	1
TNFAIP8L1	921603	203	35	34182	11583	0	3	1	0	18	9	539757	0.131157	1
ZNF48	2338593	142	59	114453	36450	0	5	0	0	50	29	1669356	0.131161	1
CD300LF	NaN	NaN	NaN	56646	16092	0	2	0	0	50	49	3022920	0.131197	1
BTN3A3	384310	375	47	112968	32103	0	3	0	0	50	8	1315656	0.131502	1
ZNF761	361546	876	-58	147447	35127	0	9	0	0	50	21	1446768	0.131528	1
MTMR2	285979	390	-1	126900	34128	0	4	0	0	50	18	1801629	0.131636	1
IGSF8	829863	386	17	111240	39906	0	5	0	0	37	14	1255743	0.132211	1
OR52N2	203856	922	-5	60372	17793	0	2	0	0	50	17	1289817	0.132675	1
TMEM40	487514	176	35	48195	12231	0	2	0	0	50	29	1540836	0.132775	1
ETFDH	171388	429	1	121230	32832	0	4	0	0	50	15	1629990	0.132973	1
SMPD4	349797	593	22	167427	49410	0	5	2	0	50	25	1677564	0.133394	1
C12orf75	NaN	NaN	NaN	13689	3483	0	1	0	0	50	49	3010311	0.133497	1
CCRN4L	332509	361	32	80649	24975	0	3	0	0	50	16	1432512	0.133525	1
ANAPC16	764632	140	40	21465	6480	0	1	0	0	50	26	1597941	0.133874	1
TGFA	715918	463	13	31806	8937	0	2	0	0	50	31	1468449	0.133993	1
RASSF4	75634	905	25	64314	17172	0	3	1	0	50	17	1675566	0.134005	1
STYXL1	1072825	218	49	62856	15957	0	3	0	0	50	29	1630368	0.134027	1
RPS20	344871	489	59	30159	8235	0	2	0	0	50	16	1038285	0.134444	1
SMAD6	580112	197	46	92718	31941	0	4	1	0	50	25	1571211	0.134453	1
RNF6	96737	562	25	130302	37368	0	5	1	0	50	18	1448010	0.134459	1
OR1M1	311030	471	-63	57915	18306	0	4	0	0	50	60	2080728	0.13476	1
PBOV1	341233	545	21	26190	7020	0	1	0	0	50	23	2014902	0.134845	1
ZCCHC13	404685	NaN	26	31671	9072	0	1	0	0	50	11	1863081	0.135127	1
MEF2C	98604	1192	32	101574	28026	0	5	2	0	50	18	1532358	0.135525	1
WDR13	817501	NaN	29	92664	28026	0	4	0	0	50	27	1576125	0.135954	1
DNAJC4	1608193	179	61	46764	13824	0	2	0	0	50	23	1532331	0.136095	1
RPTOR	782748	381	22	261738	73602	0	13	3	0	22	9	776493	0.136514	1
MME	72464	650	-12	152928	36693	0	3	0	0	50	17	1822500	0.137357	1
POP7	1483965	336	46	25974	8613	0	2	0	0	50	55	2125872	0.137522	1
KRTAP25-1	NaN	NaN	NaN	20385	4968	0	1	0	0	50	49	3011796	0.137895	1
ST6GALNAC4	1278941	201	51	58185	17064	0	2	0	0	50	22	1692036	0.138266	1
ASPHD1	NaN	NaN	NaN	70956	24705	0	2	0	0	50	49	3031533	0.138575	1
RBM42	1162794	390	27	89478	30483	0	3	0	0	50	24	1564299	0.138981	1
GAL3ST4	1299015	205	52	89100	29889	0	4	0	0	50	20	1580715	0.139144	1
TIGD2	147602	529	24	101250	26568	0	3	0	0	50	19	1528740	0.139244	1
TTC8	162049	703	-6	103545	26541	0	2	0	0	50	12	1686447	0.139607	1
SCGB1D2	3058870	450	42	18009	4914	0	1	0	0	50	17	1236627	0.139743	1
CLIC1	2513551	176	26	47007	13419	0	3	0	0	50	35	1953639	0.139848	1
ADSL	445026	427	47	96093	25974	0	4	0	0	50	18	1696248	0.140156	1
GJA9	524940	458	24	98253	27459	0	4	0	0	42	20	1154466	0.140296	1
CPA4	424934	212	30	83916	22032	0	5	0	0	42	23	1564272	0.140528	1
ANTXR2	62176	905	6	99333	28080	0	2	0	0	46	7	1304127	0.140539	1
GJA5	NaN	NaN	NaN	67392	20169	0	7	2	0	22	16	746361	0.140855	1
OR2T33	18846	936	-35	59697	18225	0	2	1	0	22	3	531495	0.140943	1
KRTAP13-2	4608	1035	-69	32724	10206	0	2	0	0	50	21	1074573	0.141563	1
CDIPT	NaN	NaN	NaN	41364	12258	0	2	1	0	29	20	1122228	0.141604	1
SLA	NaN	NaN	NaN	62370	17820	0	2	0	0	50	49	3024648	0.1424	1
C1orf162	397300	348	28	30564	8964	0	1	0	0	50	17	1509732	0.142592	1
GPR45	184828	497	0	68202	22437	0	3	1	0	50	16	1549503	0.142836	1
RAD51C	524193	222	17	73683	20844	0	2	0	0	50	10	1479195	0.142855	1
RPS6KB2	1331051	161	52	94284	27783	0	3	0	0	50	10	1535598	0.143127	1
EIF3E	187290	965	6	90774	21654	0	2	0	0	45	9	1456596	0.143343	1
BOD1	255069	371	31	36990	11529	0	1	0	0	50	12	1716579	0.143394	1
ZNF839	1615110	214	35	172449	55485	0	6	0	0	29	6	857709	0.143764	1
YWHAQ	700762	154	40	48708	12690	0	3	0	0	50	27	1494369	0.144012	1
PRR23C	NaN	NaN	NaN	47385	16524	0	2	1	0	50	50	3023352	0.144118	1
IDO1	11280	520	7	79785	21303	0	2	0	0	50	13	1703295	0.1444	1
MAGEC1	17504	NaN	-11	214515	63639	0	5	1	0	50	25	2466369	0.144732	1
CLPP	943949	407	31	53163	16011	0	2	0	0	50	23	1371519	0.144755	1
FABP4	191177	595	1	26784	6669	0	1	0	0	50	21	1549287	0.144778	1
DACH2	49531	NaN	-32	117342	32913	0	3	0	0	30	10	1046142	0.144848	1
UBL3	322680	335	21	24030	5940	0	1	0	0	50	18	1664388	0.145116	1
ZFAND1	158801	681	12	58185	13500	0	2	0	0	50	20	1391499	0.145247	1
THG1L	243382	987	31	59400	14877	0	2	0	0	48	16	1324296	0.145619	1
VIPR2	179290	348	-24	86130	24435	0	3	0	0	50	21	1843101	0.145637	1
MMGT1	253719	NaN	20	25299	7749	0	2	0	0	50	22	1372005	0.145648	1
CPA3	306125	544	-14	84051	20925	0	2	0	0	50	22	1649862	0.146131	1
HNMT	82611	496	-3	72414	17739	0	2	0	0	20	7	919485	0.146161	1
MCM9	116680	856	16	76707	20493	0	2	0	0	50	19	1419660	0.146611	1
PMAIP1	200064	434	48	10584	3105	0	1	0	0	50	27	1933470	0.146778	1
UPK1B	222933	588	0	52515	13176	0	2	0	0	50	22	1553499	0.146849	1
CLEC2B	295505	634	25	30753	6993	0	1	0	0	50	16	1609659	0.147163	1
CCDC134	1384410	199	52	45684	12150	0	2	0	0	50	15	1422765	0.147355	1
ABTB2	769733	368	32	162648	46656	0	7	0	0	41	26	1430325	0.147392	1
LYN	329738	405	50	103248	25299	0	4	0	0	31	7	998595	0.147444	1
ARHGAP28	241496	281	-28	122958	32076	0	4	0	0	40	21	1568565	0.147468	1
SLC24A2	493733	635	-12	128115	35829	0	3	2	0	50	7	1140561	0.1476	1
PPP4C	NaN	NaN	NaN	61020	16416	0	5	0	0	50	49	3023244	0.148105	1
RLN2	385172	605	16	43038	10989	0	1	0	0	50	16	1654722	0.148246	1
MAP1LC3B	583365	363	27	25272	6318	0	2	0	0	50	24	1451115	0.148338	1
RNF187	NaN	NaN	NaN	44523	13797	0	2	0	0	50	49	3020625	0.148561	1
CHCHD6	250457	604	39	46980	12798	0	2	0	0	50	17	1233063	0.14857	1
SUPT4H1	782135	399	22	23922	6210	0	1	0	0	50	26	2216349	0.148618	1
FAM83A	519858	171	22	85887	26703	0	4	0	0	34	14	1042848	0.148657	1
PLCB3	1613996	257	65	240030	69795	0	12	1	0	50	18	1617300	0.14876	1
SNAP25	168916	372	-41	51003	11448	0	1	0	0	50	10	1624320	0.149141	1
HACE1	108074	924	-9	181737	46845	0	4	2	0	50	18	1742688	0.149169	1
SMARCA1	278446	NaN	-7	210978	53163	0	7	0	0	50	23	1577421	0.149218	1
P2RY1	224331	861	8	69876	21006	0	2	0	0	40	18	1254501	0.14922	1
PXK	574675	218	36	115749	30618	0	6	1	0	50	32	1776357	0.14949	1
OAF	323731	198	31	51651	15903	0	2	0	0	50	23	1718550	0.149672	1
CGGBP1	123235	894	-3	31752	9396	0	2	0	0	50	19	1310985	0.1497	1
DCUN1D5	166625	585	-9	49059	11043	0	2	0	0	50	12	1613979	0.14974	1
LRRCC1	99309	1450	-7	207981	48870	0	5	0	0	50	13	1781784	0.150431	1
RRAD	942986	142	34	58104	18603	0	3	0	0	50	43	1633797	0.150665	1
LRRC52	262572	574	-22	58995	17793	0	2	0	0	50	29	1863405	0.150968	1
GAL3ST1	653792	330	28	79218	24462	0	4	0	0	21	8	635607	0.150991	1
DGKE	320339	324	-38	111807	29781	0	3	0	0	50	18	1862406	0.151149	1
PLCXD2	188186	322	-3	76653	21762	0	3	0	0	50	24	1803249	0.151503	1
SLC24A4	368522	642	27	119475	33129	0	3	0	0	50	14	1811295	0.151729	1
NARFL	1207790	194	33	92799	26514	0	6	1	0	50	38	1707129	0.152147	1
CCDC28B	1460758	218	29	39204	11259	0	1	0	0	50	15	1644624	0.152838	1
COQ10A	2878071	171	46	49896	15066	0	2	0	0	50	42	1854360	0.153011	1
TIPARP	407941	502	22	128790	32724	0	3	0	0	50	17	1873557	0.153372	1
FXR1	182655	1058	-2	124065	32265	0	4	0	0	50	13	1279719	0.153647	1
KRTAP8-1	30244	1055	-70	12231	3483	0	1	0	0	50	26	1094499	0.153738	1
HOXD12	242935	874	15	49626	16551	0	2	1	0	50	20	1477413	0.153959	1
C16orf80	898142	292	14	38502	10260	0	2	0	0	45	18	1366389	0.15429	1
CHERP	815495	258	44	179037	49464	0	7	2	0	50	33	1590894	0.154652	1
PDHX	663753	258	6	104112	31806	0	3	1	0	50	42	2219103	0.155215	1
YIPF6	201571	NaN	12	46467	13230	0	2	1	0	25	12	782919	0.155468	1
CCDC71	1855373	203	40	83700	30348	0	7	0	0	50	29	1781433	0.155523	1
SAR1B	887915	177	46	39987	10314	0	2	0	0	50	24	1539945	0.155848	1
RPS5	1900140	270	-14	39852	11664	0	2	1	0	50	28	1521531	0.155896	1
PROK1	403650	479	31	20574	5994	0	1	0	0	50	10	1450980	0.156427	1
FAM118A	461688	277	26	70713	18873	0	4	1	0	30	20	946809	0.15673	1
TBC1D10C	1269888	177	51	83835	27702	0	2	0	0	50	11	1569861	0.156941	1
ME1	173617	711	-13	112698	30753	0	2	0	0	50	14	1872963	0.157527	1
FAS	187494	375	39	68229	16335	0	2	0	0	50	13	1432944	0.157529	1
GNA12	764046	392	30	72765	21033	0	2	0	0	39	12	1236087	0.15754	1
WWC3	169744	NaN	34	210168	62559	0	6	2	0	50	12	1594026	0.158136	1
ZNF770	432995	382	2	134865	33615	0	4	0	0	50	13	1359369	0.158294	1
FLG2	387153	671	6	446499	135405	0	13	7	0	50	20	1358316	0.158329	1
ANGPTL1	NaN	NaN	NaN	96471	24381	0	3	0	0	50	49	3031209	0.158458	1
C1orf100	706923	537	-1	29457	7965	0	1	0	0	50	36	1804923	0.158529	1
IL17A	313277	556	11	29673	9045	0	1	0	0	50	20	1515510	0.158544	1
DDX3X	627364	NaN	54	132516	33777	0	7	2	0	50	36	1598157	0.15873	1
IGSF21	55390	692	31	88857	27783	0	3	0	0	50	19	1613601	0.158982	1
GRAMD4	415189	265	7	115317	31050	0	4	0	0	38	24	1664442	0.159012	1
KRTAP10-9	874480	461	25	55026	16335	0	2	0	0	50	33	1716957	0.159048	1
SPANXD	NaN	NaN	NaN	19629	4995	0	1	0	0	50	49	3011823	0.159359	1
C10orf11	29386	1001	3	39501	10638	0	1	0	0	50	13	1624266	0.159385	1
SLTM	532170	212	23	205173	52974	0	7	0	0	10	1	338931	0.159388	1
ZDHHC11	843639	408	28	81864	22383	0	3	2	0	40	20	1132677	0.159583	1
TCP10L2	NaN	NaN	NaN	68445	19764	0	2	0	0	50	49	3026592	0.159822	1
DHX57	850010	297	25	270243	74250	0	9	2	0	50	30	1721034	0.160002	1
PATL2	NaN	NaN	NaN	107001	30051	0	4	0	0	50	49	3036879	0.16001	1
ZNF813	361546	876	-58	121392	29754	0	7	2	0	43	16	1173123	0.160086	1
DAGLA	1235604	208	58	197775	61830	0	11	1	0	50	30	1918269	0.160401	1
IDH3B	792941	450	48	86346	24138	0	4	0	0	50	33	1930203	0.160753	1
ABRA	113560	708	18	73116	20196	0	2	1	0	50	15	1458459	0.160861	1
FAM26D	261450	479	19	25002	6507	0	1	0	0	50	21	1769418	0.161274	1
MVP	NaN	NaN	NaN	169020	53244	0	6	1	0	50	50	3060072	0.162054	1
LPAR2	768855	418	-10	63828	22194	0	3	0	0	50	18	1303965	0.162058	1
YOD1	434877	155	24	65448	19845	0	2	0	0	50	22	2008503	0.162069	1
LAPTM5	348498	411	35	52083	14256	0	3	0	0	50	25	1479168	0.1621	1
UTP23	483166	504	23	48492	13068	0	2	0	0	50	21	1518561	0.162421	1
WDR26	519341	256	18	128844	36234	0	3	0	0	50	12	1391904	0.162475	1
CSPP1	353616	640	25	252369	62964	0	5	0	0	44	9	1663470	0.162666	1
AMZ2	764688	237	11	71334	18171	0	3	0	0	50	24	1648134	0.162666	1
OR7A5	963401	546	14	59427	18333	0	1	0	0	50	8	1498905	0.162691	1
NEK7	114791	402	-13	61317	15228	0	2	0	0	50	20	1714959	0.162969	1
MEAF6	446254	357	25	41391	10125	0	2	0	0	50	12	1259226	0.163205	1
PUS3	611330	414	14	93366	24732	0	3	0	0	50	22	1541241	0.163338	1
FAM3B	224593	506	24	47547	12069	0	2	0	0	50	24	1510650	0.163446	1
MYCN	169653	1491	-12	86076	27243	0	3	0	0	50	22	1894860	0.163487	1
CDH6	133952	902	-26	152766	42687	0	6	2	0	50	24	1601640	0.163509	1
CNP	2081077	206	23	79461	24057	0	3	0	0	50	33	1744281	0.163765	1
LYPD6	105128	631	-8	33858	9234	0	1	0	0	50	10	1508031	0.163816	1
ULK1	374096	180	23	201420	62721	0	6	0	0	39	14	1607580	0.164304	1
MBNL3	143759	NaN	34	75465	21330	0	3	0	0	33	12	1142046	0.164338	1
ZBTB20	86308	644	10	140292	40986	0	7	2	0	50	26	1836324	0.164345	1
LIPF	145689	327	40	79947	19926	0	3	1	0	22	10	688500	0.164517	1
NEK6	483948	406	41	75195	19008	0	3	1	0	50	26	1957311	0.164762	1
SQSTM1	1610057	359	38	85212	24381	0	5	1	0	50	35	1369467	0.164983	1
PPME1	628196	280	38	78111	20304	0	3	0	0	50	22	1408779	0.165474	1
ERGIC1	502164	179	47	58590	15039	0	2	1	0	50	21	1454841	0.16571	1
CREB1	184506	198	25	66258	19440	0	2	0	0	50	15	1509597	0.165853	1
PRKACG	168122	498	36	66906	18792	0	3	0	0	50	21	1548936	0.166023	1
OTOL1	236814	792	-13	90477	26487	0	2	0	0	50	19	1423143	0.166152	1
MRPL51	2764720	179	42	25353	6642	0	2	0	0	50	36	1967085	0.16618	1
OR10G7	158396	830	-10	57024	18792	0	2	0	0	50	13	1808730	0.166399	1
TMEM182	63440	913	-3	45090	12096	0	2	0	0	50	12	1473498	0.166451	1
KIAA0408	151114	811	-10	136188	33993	0	3	1	0	50	16	1690659	0.166458	1
PDPN	64295	864	9	45198	14661	0	2	0	0	50	22	1868211	0.166627	1
FGF14	82526	937	-2	62424	16308	0	1	0	0	50	6	1544832	0.166637	1
OR10G8	158396	830	-10	57159	18657	0	2	0	0	50	13	1808730	0.166834	1
SLC25A32	430771	673	28	64611	18252	0	2	0	0	34	11	1180143	0.166946	1
LHX2	306688	342	19	77247	22950	0	3	1	0	50	22	1789128	0.167265	1
HEBP2	421773	590	19	40608	10422	0	1	0	0	50	16	1645191	0.167432	1
F9	69360	NaN	0	91611	23085	0	2	0	0	50	10	1689741	0.167457	1
EDDM3A	956361	577	8	29538	6750	0	1	0	0	50	22	1770957	0.167468	1
D2HGDH	960711	380	30	97956	31806	0	5	0	0	50	21	1492290	0.167592	1
RFPL3	413546	556	-16	60102	17496	0	2	1	0	50	21	1680210	0.167679	1
VEGFB	1613996	257	65	39852	12798	0	2	0	0	50	18	1617300	0.16781	1
PABPC1	1141833	276	41	125199	34047	0	13	2	0	21	31	860733	0.16829	1
COG1	221646	251	-11	188055	55026	0	7	0	0	28	10	1019628	0.16863	1
TSNAXIP1	1039476	143	49	131652	33183	0	5	1	0	50	23	1535733	0.168781	1
DEGS2	405420	237	39	60480	19062	0	2	0	0	50	23	1402785	0.168784	1
ARHGEF16	248448	483	21	137106	39960	0	5	2	0	50	25	1722492	0.16897	1
ARHGAP1	939971	176	44	87372	23436	0	3	0	0	50	16	1320516	0.169348	1
ACTL7A	336944	471	9	81621	24327	0	4	1	0	50	18	1512459	0.169373	1
HAAO	344647	338	34	56727	16092	0	2	0	0	50	17	1499364	0.169462	1
FAM47C	71087	NaN	-10	189405	62505	0	5	0	0	11	2	627102	0.169681	1
LYPD6B	132203	698	-3	41958	10530	0	1	0	0	50	14	1512135	0.169709	1
ELFN1	NaN	NaN	NaN	150957	50490	0	6	2	0	50	51	3057318	0.169977	1
ITPRIPL1	904852	213	43	107217	31293	0	5	0	0	37	21	1350189	0.170392	1
SOCS6	64018	264	7	101034	29214	0	3	1	0	35	8	1152711	0.170397	1
TMEM47	7188	NaN	-16	34398	10476	0	1	0	0	50	25	1894131	0.170397	1
CNOT2	156657	609	-17	108702	27621	0	3	0	0	50	19	1807110	0.170511	1
EIF5B	387331	612	25	245700	58455	0	5	0	0	33	5	1060722	0.170913	1
HPGD	62916	536	-11	53730	13095	0	1	0	0	50	20	1914084	0.17097	1
PRKRA	159623	482	29	64503	16497	0	2	0	0	50	28	1815777	0.17142	1
KCTD21	551110	208	23	49626	14121	0	2	0	0	50	26	1785132	0.171875	1
IDH3G	2103463	NaN	30	80919	23652	0	4	0	0	50	23	1587897	0.172342	1
OXCT1	109769	687	11	103572	28215	0	2	0	0	50	20	1886787	0.172518	1
TTC4	615595	343	19	77895	19467	0	2	0	0	50	27	1709127	0.172969	1
SGMS2	144491	683	6	70929	19305	0	2	1	0	50	21	2024163	0.173035	1
GNG3	2425755	248	51	15066	3969	0	1	0	0	50	34	1517427	0.173043	1
SNRNP25	1005761	238	36	26460	7155	0	2	0	0	50	27	1260819	0.173212	1
BTN2A2	378286	330	51	100791	28809	0	4	0	0	50	15	1602774	0.173476	1
OR9G4	384896	828	-34	60966	18657	0	2	0	0	50	33	1446795	0.173581	1
WASL	86898	536	-13	97551	28647	0	2	0	0	50	25	2011635	0.173824	1
TARBP2	1590803	191	55	70038	21735	0	3	0	0	50	18	1481922	0.174064	1
HIST1H2BM	267617	634	32	23841	7182	0	1	0	0	50	15	1176012	0.1743	1
TOB1	1152451	161	15	66312	17928	0	2	0	0	50	15	1299186	0.174466	1
RNF5	2119974	392	28	35694	9909	0	4	0	0	50	40	1803087	0.174548	1
BRD9	875343	491	30	124632	26028	0	5	0	0	50	19	1494369	0.174753	1
ZMPSTE24	627703	373	18	93852	24732	0	3	0	0	50	23	1630368	0.175216	1
HOXD10	242935	874	15	65745	17604	0	2	0	0	50	20	1477413	0.175427	1
PRB4	311837	673	-1	45657	15741	0	2	0	0	50	19	1245834	0.175521	1
PRND	477570	485	26	34020	9315	0	1	0	0	50	22	1711908	0.175558	1
CDCA7L	687019	581	-1	90045	23436	0	4	0	0	50	31	1810242	0.175863	1
DDR1	2223866	223	25	174987	54081	0	8	2	0	50	44	1757160	0.175905	1
THRB	370625	518	-12	91503	23355	0	3	0	0	50	25	1750545	0.175911	1
SLC25A30	680643	296	78	57888	15984	0	2	0	0	50	21	1629990	0.176344	1
ZPBP	135352	917	-13	69687	18441	0	2	0	0	50	20	1593648	0.176623	1
NFKBIZ	550073	421	16	139185	39096	0	4	0	0	50	18	1540215	0.176629	1
KRTAP12-4	874480	461	25	21168	6615	0	1	0	0	50	33	1716957	0.176669	1
S100A2	1454773	186	26	19629	4833	0	1	0	0	50	25	1469583	0.176787	1
CST11	188567	750	-16	28323	6426	0	1	0	0	50	19	1673433	0.17685	1
ACBD3	756400	214	24	102951	28026	0	3	0	0	50	36	1913760	0.177086	1
XPO4	413321	385	42	227043	60183	0	6	0	0	13	3	644625	0.177263	1
CLEC12B	305376	565	19	56700	13608	0	1	0	0	50	11	1984257	0.177361	1
FAM124A	175682	518	37	109242	33723	0	5	1	0	50	20	1413180	0.177618	1
RFXANK	940952	232	17	50787	15228	0	2	0	0	50	23	1565784	0.177684	1
CHRAC1	432697	238	39	26082	6642	0	1	0	0	50	20	1360206	0.177831	1
ICA1L	600089	387	25	98091	24138	0	3	0	0	50	25	1580526	0.178163	1
CRYM	467861	575	37	61047	18090	0	2	0	0	50	23	1467828	0.178249	1
IL17C	802673	189	41	36423	12501	0	2	0	0	50	45	1573749	0.178309	1
FAM71C	100701	906	0	46413	12717	0	1	0	0	50	11	1504737	0.178341	1
SULT1C2	361432	609	-10	66771	15687	0	2	0	0	50	14	1087479	0.178413	1
ICAM1	1729517	200	31	98685	32778	0	4	3	0	29	12	860247	0.178532	1
LIPT1	504421	770	21	72225	19062	0	2	0	0	50	21	1427598	0.178553	1
TRIM62	756335	385	27	90315	26649	0	3	1	0	22	6	803412	0.178559	1
DDI1	NaN	NaN	NaN	74115	22356	0	2	0	0	50	49	3029184	0.178644	1
CLEC18B	475713	278	44	90477	24219	0	2	1	0	50	20	1633176	0.179265	1
DCLRE1B	335231	545	13	100521	29970	0	3	2	0	50	22	1500093	0.179402	1
S100A11	527465	349	35	20763	5643	0	1	0	0	50	27	1637793	0.179481	1
SYNGR1	932556	250	69	57699	16578	0	3	0	0	50	20	1540161	0.179686	1
HSPB7	886121	197	43	32184	10017	0	1	0	0	50	30	1524366	0.179778	1
SS18	167310	632	37	85698	19521	0	2	1	0	50	16	1275345	0.179787	1
FAM154B	382946	701	18	77652	20115	0	2	0	0	50	26	2175633	0.179929	1
FNIP1	346839	637	27	229770	59319	0	3	1	0	50	10	1851066	0.180014	1
CCNL1	365148	610	22	102168	29133	0	3	0	0	50	23	1556523	0.18022	1
PSMD6	161890	582	19	77112	20088	0	3	0	0	50	18	1352079	0.180393	1
TMEM128	146135	584	35	28539	7263	0	1	0	0	50	18	1342818	0.180617	1
SNRPD1	301496	165	46	23436	6696	0	1	0	0	50	22	1303155	0.18082	1
HPR	426658	372	14	67905	18360	0	3	1	0	50	22	1752300	0.181148	1
CARTPT	456944	601	19	22221	6858	0	1	0	0	50	20	1335987	0.18134	1
ISY1	1142757	352	44	58347	14391	0	2	0	0	50	22	1446444	0.181347	1
CD3G	963668	192	48	37422	9153	0	1	0	0	50	28	1582281	0.18148	1
KREMEN1	794944	335	-4	96471	27216	0	4	0	0	50	24	1371546	0.181497	1
C19orf66	1615603	272	8	57591	15795	0	4	1	0	50	33	1471581	0.181661	1
PAIP2B	349503	464	30	25785	5319	0	1	0	0	50	20	1544265	0.182018	1
S100P	501655	278	47	18765	5049	0	1	0	0	50	14	1493343	0.182094	1
ABCD3	459824	348	-8	134784	35235	0	4	0	0	50	23	1727244	0.182355	1
ASB17	140995	603	-11	56889	15849	0	1	0	0	50	7	1740123	0.18238	1
CETN1	483873	521	28	33588	8613	0	2	0	0	38	21	1064556	0.182567	1
CPVL	112083	634	7	95553	24246	0	2	0	0	50	19	1743417	0.182815	1
LY6K	384374	412	23	42579	10395	0	2	0	0	50	22	1773765	0.182969	1
PSG1	394104	283	-23	83889	23922	0	2	0	0	50	25	1819017	0.182983	1
ZDHHC4	946573	387	40	67230	18711	0	3	0	0	50	32	1456272	0.183315	1
IL12A	422983	616	22	49923	13743	0	2	0	0	50	16	1204227	0.183407	1
LEKR1	364723	522	10	138969	33318	0	3	0	0	50	14	1455003	0.183408	1
ZNF765	374515	876	-62	103923	24381	0	5	1	0	50	18	1329750	0.18344	1
CCR5	243983	625	36	66852	19251	0	2	0	0	50	15	1309581	0.183633	1
PIGT	1037999	382	35	110241	34182	0	5	3	0	31	15	786861	0.18364	1
TMEM14B	263716	468	14	23004	6561	0	3	1	0	11	9	254583	0.183748	1
CROT	222199	876	3	128493	32778	0	3	0	0	50	17	1651698	0.183922	1
SLC44A2	2082774	226	33	142614	38826	0	5	1	0	50	24	1363500	0.183986	1
AGPS	378489	434	26	131679	34776	0	2	0	0	40	9	1472823	0.1842	1
ANAPC7	964525	206	50	117693	31590	0	4	1	0	50	28	1466910	0.184437	1
CRY2	429658	271	34	120447	35478	0	3	0	0	35	13	1061694	0.184548	1
STK38	942238	148	37	95094	22356	0	4	0	0	50	25	1652481	0.184674	1
LYZL6	703538	424	31	29673	7506	0	1	0	0	50	23	1677942	0.184755	1
WDR25	410676	215	23	103491	30888	0	3	0	0	50	12	1560033	0.184969	1
KRTAP5-5	NaN	NaN	NaN	44820	13176	0	2	1	0	29	20	1123146	0.185034	1
KRBA2	772200	257	20	95445	24840	0	4	0	0	50	21	1312119	0.185061	1
FAM20C	195067	593	-4	52677	18036	0	2	0	0	50	12	1555038	0.185192	1
SPAG7	1416161	231	30	46224	11286	0	1	0	0	50	18	1416825	0.185257	1
INSL5	335045	692	-16	26460	7074	0	1	0	0	50	17	1355994	0.185408	1
C4orf26	461415	491	19	25353	6966	0	1	0	0	50	21	1550826	0.185652	1
LUC7L	1267639	220	36	73359	20115	0	3	0	0	50	24	1264923	0.185683	1
RBMXL2	354782	922	-11	70740	24759	0	2	1	0	50	13	1346139	0.18607	1
KEL	294033	676	2	143667	40284	0	4	0	0	46	17	1239408	0.186256	1
DDR2	322980	293	9	168021	45171	0	3	1	0	50	15	1713258	0.186333	1
VASH2	315884	412	12	69390	19062	0	3	0	0	50	26	1897290	0.186601	1
SNRPN	NaN	NaN	NaN	45414	15093	0	2	0	0	50	49	3021921	0.186811	1
DCP1A	782208	167	43	111456	33129	0	4	0	0	50	26	1768878	0.186937	1
REG3A	10958	1389	-22	35316	9396	0	2	0	0	50	27	1329426	0.187046	1
EID3	NaN	NaN	NaN	64098	17064	0	3	0	0	50	49	3023892	0.187058	1
CDX4	221528	NaN	-13	54189	15633	0	1	0	0	50	7	1225800	0.187166	1
SSTR3	845055	230	67	75870	26271	0	3	1	0	50	14	1291815	0.187321	1
STX1A	1082063	214	54	60264	13041	0	3	1	0	46	39	1644327	0.187554	1
PPFIA1	514596	530	44	237465	63936	0	9	1	0	50	15	1504305	0.187895	1
ACSL1	311713	515	30	138726	37611	0	6	0	0	13	5	486351	0.188244	1
RHCE	667862	185	32	82782	21870	0	4	1	0	50	24	1460025	0.18833	1
NARS	304947	352	38	109134	28485	0	3	0	0	50	14	1266597	0.188698	1
GMNN	422850	362	40	42282	10692	0	1	0	0	50	21	1830168	0.188803	1
MOSPD3	1884430	247	60	43794	15174	0	2	0	0	50	18	1742715	0.188842	1
TEKT3	266888	359	-53	95310	26271	0	4	0	0	22	8	625617	0.18901	1
FBXW9	1967616	218	15	86724	27891	0	4	0	0	50	27	1932795	0.189083	1
UNC5C	25813	910	-12	179793	51543	0	4	0	0	50	24	2242080	0.189248	1
PRKCE	172588	465	32	145314	38556	0	5	0	0	50	19	1815912	0.189526	1
KRTAP5-1	NaN	NaN	NaN	51975	16146	0	2	0	0	50	49	3022974	0.18954	1
ZNF556	1287128	291	27	89127	23058	0	3	0	0	45	17	1416879	0.189612	1
OR6C6	411183	816	-1	59211	17172	0	2	0	0	50	17	1479168	0.190212	1
PLRG1	59883	1034	20	102843	27000	0	2	1	0	50	11	1450494	0.190263	1
C21orf2	1153513	308	65	48546	15849	0	3	1	0	39	28	986229	0.190461	1
TNNT1	1036976	266	-1	58185	13824	0	2	0	0	50	19	1118016	0.190488	1
NEUROD6	48298	883	-4	65016	17442	0	2	1	0	50	21	1709370	0.191018	1
ST3GAL4	349521	514	31	65583	17847	0	2	0	0	50	23	1858059	0.191305	1
C9orf152	203263	245	32	45252	13392	0	2	1	0	50	21	1355481	0.19134	1
MRPL32	163131	744	-6	36369	10368	0	1	0	0	50	11	1474173	0.19141	1
BMP7	207872	617	-21	83862	23058	0	3	0	0	50	29	1951560	0.191691	1
NACC1	1948449	221	41	100467	29457	0	4	0	0	50	27	1626588	0.191762	1
PTTG1	197504	619	30	39879	11232	0	2	0	0	50	25	1531710	0.191996	1
2021-03-05	429135	317	31	54459	14958	0	3	0	0	17	5	341199	0.192081	1
PI3	842540	324	25	22788	6615	0	1	0	0	50	28	1730187	0.192107	1
PENK	411547	624	-16	52137	13797	0	2	0	0	50	17	1291491	0.192268	1
TMUB2	930750	175	41	59724	19818	0	3	0	0	50	29	1652859	0.192781	1
PARD3	139914	776	0	268407	71955	0	6	0	0	11	0	395685	0.192821	1
MFSD2B	243145	226	33	93582	31320	0	3	0	0	50	16	1371141	0.192962	1
RRP7A	969686	196	65	54783	15606	0	3	0	0	50	22	1360719	0.192963	1
JAKMIP3	146849	592	-12	168102	44037	0	3	0	0	50	7	1694493	0.192988	1
POU4F1	41876	1004	-1	76356	26028	0	1	0	0	50	6	1364040	0.193046	1
C3orf36	548078	520	28	29538	10800	0	1	0	0	50	32	1676673	0.193066	1
SLC35B3	294217	804	-11	79218	21708	0	2	0	0	50	14	1343655	0.193072	1
BTBD7	321756	407	31	220428	63720	0	8	1	0	50	20	1782729	0.193094	1
ZNF805	NaN	NaN	NaN	122094	31482	0	4	0	0	50	49	3038310	0.193154	1
ODF2	1916608	160	35	172233	45333	0	6	1	0	50	26	1732050	0.193214	1
SPAG11B	NaN	NaN	NaN	68904	17766	0	2	0	0	50	49	3024594	0.193222	1
TOP1	383646	129	14	157599	35019	0	5	0	0	50	24	1523043	0.19375	1
ZNF514	223452	616	24	78894	19521	0	2	0	0	50	16	1631799	0.193855	1
ZNF586	680410	849	-50	78516	20061	0	4	0	0	50	25	1366767	0.194015	1
IL3RA	NaN	NaN	NaN	77922	20493	0	3	1	0	50	50	3027321	0.194268	1
POLR3H	1467336	183	66	40959	10800	0	3	0	0	50	32	1572588	0.19429	1
TFG	345618	509	16	77976	21735	0	2	0	0	50	21	1926288	0.194405	1
PSMC2	355264	620	17	86643	22545	0	3	0	0	50	19	1576935	0.194431	1
PACSIN3	1240468	184	31	83592	22599	0	4	1	0	50	37	1624860	0.194585	1
NOB1	1410481	NaN	39	80298	22815	0	4	0	0	41	44	1897344	0.194631	1
GLP2R	76286	212	-53	107757	30753	0	2	0	0	26	5	958635	0.194651	1
HIST1H2AA	272695	635	29	24273	8127	0	1	0	0	50	16	1309365	0.194672	1
OR10X1	179404	940	1	60291	18441	0	1	0	0	40	9	1380753	0.194719	1
TAS1R1	628180	259	38	163647	42741	0	4	2	0	50	24	1709856	0.195078	1
HIST1H3E	390169	544	57	25110	8343	0	5	2	0	14	4	154980	0.195168	1
CYSLTR1	486217	NaN	-9	64935	17685	0	2	0	0	50	18	1546803	0.195462	1
TMPRSS11A	212678	809	4	83862	21600	0	3	0	0	18	5	517077	0.195473	1
ERG	162262	418	4	97605	25596	0	4	0	0	23	5	563247	0.19554	1
STIL	321135	366	6	251478	66933	0	4	0	0	19	1	666144	0.195825	1
COPZ1	664708	190	45	36666	9342	0	2	0	0	50	39	1691901	0.195953	1
NAP1L5	177679	486	8	35343	9126	0	1	0	0	50	15	1540053	0.196236	1
ARL2	3151458	209	52	35991	10422	0	2	0	0	50	44	1801548	0.196358	1
NRAS	600650	472	11	37989	9801	0	2	1	0	10	4	256230	0.196529	1
IL1R2	215759	556	12	77841	21870	0	2	0	0	50	19	1695222	0.196769	1
VPS28	2043455	200	36	52623	13473	0	2	0	0	50	24	1283850	0.196979	1
FAM83F	712106	370	28	94041	29160	0	3	1	0	50	22	1614033	0.197072	1
TSN	227057	517	22	44712	12555	0	1	0	0	50	26	1658043	0.197791	1
ACTR1B	362146	520	25	73521	21330	0	2	0	0	50	16	1944054	0.197812	1
ROMO1	1423559	169	53	15606	4482	0	1	0	0	50	18	1414017	0.198036	1
RSBN1L	262077	795	25	163377	44874	0	4	0	0	28	5	837297	0.198086	1
DNAJC19	182678	1094	-4	24030	6183	0	1	0	0	50	11	1412694	0.198334	1
ETV6	233493	629	31	88209	24138	0	4	0	0	50	15	1196451	0.198654	1
MYEF2	219744	588	-38	120933	30294	0	5	0	0	31	22	1006722	0.198665	1
ZBED6	NaN	NaN	NaN	187407	50571	0	4	1	0	50	50	3057399	0.198705	1
MTERF	512495	617	-7	77166	20682	0	1	0	0	50	6	1339119	0.198728	1
GRIK2	10349	1062	-25	188919	51165	0	5	0	0	19	6	1008045	0.199071	1
HOOK3	478917	475	25	146664	34857	0	4	1	0	50	27	1847610	0.199085	1
ZNF814	NaN	NaN	NaN	168075	40581	0	5	2	0	50	51	3047409	0.199106	1
PHC3	396500	426	32	190242	56484	0	5	0	0	50	17	1516266	0.199106	1
SLC35A5	279107	502	33	82863	22356	0	4	0	0	50	24	1454706	0.199511	1
BEGAIN	402460	304	5	111672	34614	0	3	1	0	50	19	1805436	0.199613	1
RAP1B	439623	356	37	37665	9558	0	2	0	0	50	24	1516995	0.199627	1
CADPS2	61224	1046	-3	261144	66987	0	4	0	0	50	4	1278477	0.199645	1
XAB2	611341	384	33	167481	46683	0	5	0	0	28	6	929016	0.199714	1
CEP170	180288	1024	0	308610	85131	0	8	3	0	50	14	1371816	0.19973	1
FAM98A	116876	865	5	99900	28647	0	4	0	0	16	1	457866	0.199833	1
HIST1H2BN	228884	634	40	23706	7317	0	1	0	0	50	17	1122795	0.199902	1
RAB8A	761374	298	42	42336	10476	0	2	0	0	50	33	1425951	0.199961	1
NBPF7	415110	581	26	83889	20844	0	2	0	0	45	15	1427463	0.200065	1
GRB10	185646	602	-4	118395	31212	0	3	0	0	50	13	1548423	0.200132	1
RNF34	650760	244	38	73737	19737	0	3	0	0	50	29	1885626	0.200258	1
MED30	139000	574	0	34938	9531	0	1	0	0	50	16	1569915	0.200386	1
GLCCI1	179344	405	24	103113	32319	0	3	0	0	50	15	1536894	0.200501	1
CHST8	487426	623	-26	79380	24867	0	3	1	0	50	20	1319274	0.200659	1
ZBED1	NaN	NaN	NaN	131031	38421	0	7	1	0	50	50	3045249	0.200953	1
NCBP1	495483	358	36	160110	39231	0	6	1	0	50	23	1421091	0.200997	1
AGPAT5	130932	475	32	72036	18927	0	2	1	0	50	20	1855008	0.201097	1
RBM28	906031	255	22	152361	38151	0	4	0	0	50	18	1444689	0.201162	1
CHST4	443039	600	18	73197	21168	0	2	0	0	50	19	1390230	0.201168	1
CRISP2	67596	1248	-6	49545	12015	0	1	1	0	50	10	1326564	0.201199	1
LRRC17	749653	456	23	87885	21789	0	2	0	0	50	24	1620162	0.201307	1
HIST1H2BO	228884	634	40	23895	7290	0	1	0	0	50	17	1122795	0.201419	1
DYNC1I1	184459	747	-7	128358	33804	0	3	0	0	50	16	1705239	0.201542	1
ABCD1	1910154	NaN	37	138753	45441	0	6	1	0	50	31	1722681	0.2016	1
FBXO45	1149194	156	30	53703	16686	0	3	0	0	50	22	1455192	0.201637	1
ALDH1L2	244603	334	33	182196	49464	0	7	1	0	50	18	1417932	0.201674	1
RAB6B	530925	520	25	42444	10611	0	2	0	0	50	13	1223937	0.202164	1
C19orf40	481910	448	-16	41661	12123	0	2	0	0	50	16	1413396	0.202166	1
CKMT2	182569	777	30	81243	23733	0	2	0	0	50	15	1654317	0.20228	1
SULT1E1	9735	1009	4	60453	13500	0	1	0	0	50	9	1722897	0.202317	1
LGALS14	1243326	439	23	34398	9018	0	2	0	0	50	25	1349109	0.202575	1
MMP7	524316	359	17	52704	14202	0	2	0	0	50	28	1605717	0.203472	1
KCNIP4	35439	1264	3	59697	14256	0	1	0	0	18	1	621216	0.203561	1
GMDS	160107	647	20	74169	19710	0	2	0	0	50	15	1501335	0.203874	1
TAPBP	1456953	262	30	94122	31671	0	2	0	0	50	15	1588545	0.203893	1
ZC3H18	626708	184	39	183411	53919	0	8	0	0	30	11	948294	0.203973	1
ZBTB8A	1429703	230	21	85752	22545	0	3	0	0	50	28	1601748	0.20399	1
TSLP	205349	738	6	31563	8289	0	1	0	0	50	19	1605825	0.204087	1
BCAS4	421783	191	36	46089	13122	0	1	0	0	50	28	1697868	0.204509	1
TMEM200C	269994	959	-10	111591	39879	0	3	0	0	50	14	1435401	0.204526	1
RARS	413838	432	30	131571	33750	0	2	0	0	50	15	1854846	0.204572	1
PPAN	NaN	NaN	NaN	80271	22518	0	3	0	0	50	49	3029346	0.204691	1
PPIC	183387	519	12	41013	12042	0	1	0	0	50	14	1874772	0.204718	1
CDC123	328303	227	34	69849	16011	0	3	0	0	50	24	1359342	0.204746	1
PRMT1	1733181	195	36	74871	18927	0	4	0	0	50	29	1722627	0.204958	1
BHLHA15	464632	375	26	34587	11907	0	1	0	0	50	15	1439640	0.204961	1
BCL7B	955146	171	48	39636	11313	0	2	0	0	50	23	1713906	0.205707	1
RSF1	577731	354	33	283770	71496	0	12	0	0	8	2	424440	0.205707	1
SSR1	755548	283	24	56700	15309	0	2	0	0	50	33	2017116	0.205814	1
LRRC30	38085	336	-37	55917	17388	0	1	0	0	50	10	1688067	0.206037	1
PDE1B	643658	392	33	110889	29241	0	2	0	0	30	4	788562	0.206161	1
ZNF101	768855	418	-10	85482	21843	0	3	0	0	50	18	1303965	0.206246	1
MC5R	131146	815	8	61128	18090	0	1	0	0	50	15	1550421	0.206312	1
SLC35C1	431496	381	20	66852	22167	0	2	1	0	50	19	1597806	0.206387	1
MEX3A	2005405	213	39	94257	32670	0	3	1	0	50	30	1650969	0.206495	1
HNRNPH3	615189	250	20	69309	17928	0	2	0	0	50	22	1479276	0.206511	1
LIG4	71759	952	-32	175878	46062	0	5	1	0	50	15	1377432	0.20706	1
NCK1	181954	195	20	73926	18900	0	2	0	0	50	20	1547235	0.207073	1
TAS2R43	371136	676	4	59481	16173	0	2	1	0	50	24	1541538	0.207298	1
C19orf70	879991	295	21	23355	6534	0	1	0	0	50	26	1530495	0.20772	1
C2orf42	677043	143	42	110916	31401	0	4	2	0	18	7	557766	0.20777	1
RABL2A	522522	603	16	47547	11016	0	1	0	0	50	15	1492776	0.207813	1
PAX6	172494	631	-11	85833	23922	0	1	0	0	50	9	1844100	0.207893	1
DCAF4L2	26672	994	-27	73521	22869	0	3	1	0	50	33	1938411	0.208106	1
PPM1G	1244404	179	39	107298	28539	0	2	0	0	50	20	1639899	0.208372	1
INPP1	682366	401	33	77031	21789	0	2	0	0	14	2	485568	0.208491	1
ROPN1L	628188	219	21	45360	12231	0	1	0	0	50	26	1612116	0.208721	1
BOC	437186	634	21	212652	64287	0	8	3	0	50	15	1467936	0.208823	1
CSTL1	188567	750	-16	28944	7344	0	1	0	0	50	19	1673433	0.208947	1
WNT7B	498719	270	28	67095	18927	0	4	0	0	34	19	932769	0.209055	1
POP1	635159	368	44	198450	55485	0	7	1	0	26	11	934416	0.209133	1
TCTEX1D4	574317	191	43	39447	15147	0	3	1	0	50	37	1548882	0.209162	1
FBXO30	77282	736	0	142803	39123	0	2	1	0	40	8	1532277	0.209202	1
SESN3	349302	468	13	97335	25380	0	3	0	0	50	20	1428300	0.209442	1
TMIGD1	475180	232	26	52380	13473	0	2	0	0	50	34	1357533	0.20959	1
TYW1	423966	491	32	147177	35802	0	5	1	0	33	7	716229	0.209652	1
NR2E1	334933	436	35	74898	21492	0	2	0	0	50	27	1482246	0.209759	1
OSBPL1A	150936	360	35	193023	46818	0	4	0	0	37	8	1142883	0.210298	1
HIST1H3J	228884	634	40	25083	8370	0	1	0	0	50	17	1122795	0.210919	1
MBTPS2	93093	NaN	16	100278	29322	0	4	0	0	50	23	1530090	0.211094	1
TMEM151A	2133752	236	53	84861	29430	0	6	1	0	50	42	1856763	0.211116	1
TIFAB	625030	509	47	29430	10260	0	1	0	0	50	25	1830735	0.211217	1
AKT1	711772	247	36	96255	24840	0	4	0	0	34	20	1056294	0.211658	1
CEBPG	302640	510	-21	29214	7803	0	1	0	0	50	25	1811970	0.21181	1
DDB2	1274054	198	38	83889	23031	0	2	0	0	50	22	1395738	0.212247	1
EBAG9	134329	623	8	43254	10692	0	1	0	0	50	18	1541295	0.21236	1
PPIL1	836025	244	43	32805	8748	0	2	0	0	50	29	1755864	0.212517	1
OVGP1	397926	461	18	130086	38313	0	2	0	0	43	14	1492236	0.212778	1
ZSWIM2	278175	629	-5	125523	31293	0	3	1	0	50	29	1816020	0.212888	1
GMFB	466180	371	28	29997	6858	0	1	0	0	50	14	1313523	0.212928	1
GRK5	831479	338	30	118422	30051	0	4	1	0	50	28	1516590	0.213095	1
SLC38A8	494952	460	3	82431	26433	0	2	0	0	50	7	1355994	0.213101	1
LEMD1	662921	249	41	21708	5751	0	1	0	0	9	3	337716	0.213313	1
PSPC1	309425	481	34	101925	27999	0	4	0	0	50	25	1414989	0.213607	1
LGALS12	887496	459	31	65232	19494	0	2	0	0	50	26	1710207	0.213678	1
MRPL24	1649536	208	53	42444	12069	0	2	0	0	50	26	1647027	0.213758	1
KIF1C	1399774	343	26	211491	63585	0	9	0	0	6	0	190620	0.213948	1
SMARCA4	1984564	190	40	328212	92097	0	14	3	0	50	28	1687527	0.214171	1
MST1	1551582	271	48	142236	40014	0	6	3	0	50	50	1662741	0.2143	1
FILIP1	441614	325	19	232713	63909	0	5	2	0	50	7	1424709	0.214352	1
SPRY1	98850	613	21	61101	16983	0	1	0	0	50	14	1629018	0.214389	1
EPYC	20238	574	-33	63072	17361	0	2	0	0	50	17	1605204	0.214779	1
C9orf41	95299	649	-13	80973	20925	0	2	0	0	50	13	1735209	0.215277	1
C6orf62	422850	362	40	45765	11421	0	1	0	0	50	21	1830168	0.215344	1
EGFL7	1918290	190	56	53487	15687	0	2	0	0	50	16	1488753	0.215522	1
ISX	234416	597	-76	46602	14148	0	2	0	0	50	58	2100600	0.215626	1
HAVCR1	138350	1207	11	69714	21573	0	2	0	0	50	20	1595376	0.215642	1
RNF121	737476	311	53	65286	17010	0	3	0	0	50	16	1085481	0.215682	1
SPACA4	1597109	242	31	22707	7668	0	1	0	0	50	29	1576125	0.21573	1
PARP15	419536	311	44	136485	37827	0	3	0	0	50	17	1754838	0.215822	1
PRPS1L1	89480	675	-1	60318	17523	0	2	0	0	50	13	1568484	0.21592	1
FXYD4	388267	387	-2	19467	4671	0	1	0	0	50	16	1439937	0.215956	1
CCDC27	249153	341	24	129357	34020	0	4	1	0	50	23	1620864	0.216071	1
N6AMT1	312901	480	6	41580	12447	0	1	0	0	50	15	1636713	0.216078	1
WASF3	149391	643	10	96579	28242	0	3	1	0	50	23	1664226	0.216098	1
EHD2	812020	262	36	102897	30915	0	6	1	0	50	38	1761507	0.216115	1
ARL6IP5	264082	443	20	36558	10017	0	1	0	0	50	26	1749816	0.216187	1
HPN	738570	419	-34	81054	24408	0	4	0	0	33	15	1007856	0.216469	1
MMAB	436841	428	38	49707	14040	0	2	1	0	50	28	1590570	0.21656	1
ZADH2	73586	993	4	69228	22950	0	1	1	0	50	12	1757970	0.21666	1
ERCC6	NaN	NaN	NaN	290790	78732	0	7	1	0	50	50	3085560	0.21707	1
GABRG1	36353	926	-2	91962	23868	0	1	0	0	50	5	1652562	0.217211	1
CDH19	6200	1015	-45	151443	39636	0	4	0	0	50	15	1557495	0.217659	1
PLXDC2	19386	1014	-10	105165	27837	0	3	1	0	50	16	1734993	0.218047	1
KDM6B	2148615	337	24	311310	104139	0	10	5	0	43	31	1712367	0.218134	1
OR2A5	222080	812	-11	57807	17928	0	1	0	0	50	18	1521990	0.218167	1
OR52J3	97256	1024	-11	57159	17928	0	1	0	0	50	15	1920699	0.218195	1
CPEB1	567143	566	19	110457	31131	0	3	1	0	50	21	1406349	0.218674	1
ZFPL1	3267059	207	46	59076	18765	0	3	1	0	47	27	1406592	0.218812	1
OR2T2	112460	903	-20	60021	18954	0	1	0	0	50	21	1675647	0.21883	1
TCEAL6	132641	NaN	4	36099	8937	0	1	0	0	50	7	1313712	0.219002	1
PTEN	259678	300	34	81756	19008	0	2	0	0	50	17	1383210	0.219191	1
MB	936853	205	-13	30807	7992	0	2	0	0	50	24	1357155	0.219342	1
GUCY1B3	43576	643	-1	122526	32346	0	2	0	0	50	11	1609416	0.219372	1
BPHL	444075	435	41	56862	16200	0	2	0	0	50	32	1952208	0.219493	1
NAB2	2026922	199	41	97902	31860	0	3	1	0	50	24	1613250	0.219567	1
NFIB	135826	563	-17	82323	22572	0	3	0	0	50	28	1897182	0.219605	1
TMOD1	523548	420	35	71361	19035	0	3	1	0	27	9	724383	0.219826	1
EDEM3	370601	493	4	185328	47547	0	3	1	0	50	12	1517211	0.220176	1
MOCS3	386595	367	36	82944	29241	0	3	0	0	50	27	1623618	0.220491	1
DUSP22	224772	684	46	37800	9423	0	1	0	0	50	16	1091556	0.220526	1
CDK5	622098	373	41	58725	16038	0	3	1	0	29	16	963900	0.22089	1
FOXK2	2114072	155	26	122499	40716	0	4	2	0	50	35	1884978	0.221013	1
SLC25A10	3745109	205	30	56052	17334	0	5	0	0	50	38	1356858	0.221222	1
PRRT1	2119974	392	28	55242	20331	0	3	0	0	50	40	1803087	0.221279	1
PNMAL2	1099113	393	25	116802	37746	0	5	2	0	18	5	688662	0.221419	1
PCYOX1L	422727	380	28	93933	28134	0	5	1	0	15	6	437697	0.221423	1
OR5W2	4214	1074	-46	58320	17091	0	1	0	0	50	11	1518642	0.221459	1
POU3F2	171189	927	-7	82242	25650	0	2	0	0	50	18	1507707	0.221551	1
ZFR	386475	357	27	208116	59427	0	8	1	0	50	19	1648377	0.221748	1
TMEM106B	114769	532	-9	54864	14229	0	1	0	0	50	16	1702782	0.222044	1
PAF1	1748498	252	32	108054	25434	0	5	0	0	50	42	1775547	0.222529	1
SCRT2	622277	480	42	56808	18360	0	1	0	0	50	31	2134836	0.222996	1
MFSD6L	423397	636	11	107001	35640	0	3	1	0	50	30	1568808	0.22313	1
DCAF4	354097	341	41	100683	24300	0	3	0	0	50	16	1604097	0.223252	1
LILRA1	978578	625	-1	93582	28404	0	6	2	0	34	32	966276	0.223709	1
SPINK9	79210	459	-15	18171	4104	0	1	0	0	50	24	1861434	0.224127	1
FAM26E	261450	479	19	59319	16497	0	2	0	0	50	21	1769418	0.224215	1
NSMCE4A	249185	396	25	76626	20574	0	2	0	0	50	14	1613007	0.224339	1
GPR183	NaN	NaN	NaN	69120	19170	0	2	0	0	50	49	3025998	0.224418	1
MBIP	81955	627	-10	69147	17442	0	1	0	0	50	10	1763343	0.224813	1
ARMC1	145894	455	4	55458	15255	0	2	0	0	14	1	283527	0.225024	1
KCNA3	318208	730	22	106029	33939	0	4	0	0	27	13	1200042	0.225074	1
SCGB1D4	3058870	450	42	16605	4617	0	1	0	0	50	17	1236627	0.225135	1
C5	628273	379	37	334395	86238	0	6	2	0	50	17	1614438	0.225151	1
HTATSF1	374989	NaN	23	151173	35451	0	3	0	0	50	21	1748547	0.225273	1
TP53TG5	1037999	382	35	57105	15228	0	2	0	0	50	24	1321785	0.225462	1
RDH5	1814311	384	26	58698	20115	0	3	0	0	50	21	1209384	0.225639	1
SLC25A11	1416161	231	30	60210	18603	0	2	0	0	50	18	1416825	0.225749	1
MMP16	27285	939	-34	129330	33804	0	3	0	0	26	5	708102	0.22576	1
KCTD4	613630	276	60	49599	13581	0	2	0	0	50	42	1464912	0.226083	1
LCP2	79392	629	34	108486	27756	0	3	0	0	48	19	1454193	0.226151	1
ZNF442	1744621	671	-8	124200	29700	0	5	2	0	24	13	786699	0.226166	1
CYP2E1	563924	525	-10	96525	26271	0	2	0	0	50	8	1347921	0.226202	1
FAM199X	354255	NaN	47	76005	20142	0	1	0	0	50	11	1518642	0.22625	1
PPP1R3D	73597	856	-36	53973	18927	0	3	1	0	8	4	269487	0.226296	1
SDR42E1	207928	635	13	74061	22329	0	2	0	0	50	27	1949157	0.226337	1
CD1E	135429	902	5	76572	19575	0	2	0	0	14	1	383940	0.226419	1
UBQLNL	99343	946	-2	90207	25461	0	1	0	0	50	8	1642221	0.226863	1
SMAP1	169371	764	11	91773	25191	0	2	0	0	50	17	1572372	0.226869	1
OTX1	240308	505	12	66069	20844	0	2	0	0	50	24	1617030	0.227174	1
SDR9C7	2103486	286	26	59454	17820	0	3	1	0	50	41	1850661	0.227651	1
COMMD3	195915	462	23	39798	10260	0	1	0	0	50	19	1334583	0.227657	1
FABP9	191177	595	1	27000	6210	0	1	0	0	50	21	1549287	0.22777	1
TRAM2	421188	378	33	73656	19737	0	2	0	0	50	13	1445337	0.227895	1
JARID2	86503	782	34	240003	68526	0	10	2	0	50	23	1731564	0.22815	1
PGM5	127057	681	-4	109269	31995	0	2	0	0	50	14	1581741	0.22833	1
SIM1	103376	626	0	148149	41472	0	3	1	0	47	9	1601262	0.228416	1
ST8SIA2	288853	578	-30	72333	20655	0	2	1	0	50	33	1910817	0.228433	1
PRR14	2255010	158	60	108945	37179	0	6	0	0	35	29	1316196	0.229198	1
PGAM5	724450	495	35	58023	18360	0	2	0	0	50	31	1896993	0.229403	1
PCDH19	128045	NaN	-15	215298	65529	0	7	1	0	50	10	1409616	0.22956	1
C6orf47	2517236	193	20	53028	18657	0	3	1	0	17	5	356319	0.230073	1
ZNF513	1244404	179	39	100575	32103	0	3	0	0	50	20	1639899	0.230231	1
TUBB1	978901	125	28	86832	23976	0	5	1	0	50	29	1503927	0.230261	1
CD47	288227	650	5	65016	17280	0	2	0	0	50	27	1646676	0.230287	1
FZD1	64493	946	-2	119340	38124	0	2	0	0	50	8	1639332	0.230541	1
KRT86	839631	175	48	93960	27135	0	4	0	0	50	33	1770336	0.230609	1
PDZK1IP1	364960	414	3	22545	6372	0	1	0	0	50	16	1546128	0.230798	1
RFXAP	191525	731	-15	51705	15282	0	1	0	0	50	14	1792989	0.230967	1
C12orf50	152672	507	-36	84888	19521	0	2	1	0	25	13	768933	0.231024	1
ARSA	1073094	203	43	93852	32184	0	3	1	0	50	28	1755891	0.23128	1
THAP8	980636	320	19	50220	17577	0	2	0	0	50	31	1407375	0.23139	1
RAD9A	1269888	177	51	75924	22734	0	2	0	0	50	11	1569861	0.231664	1
ADIPOQ	449980	384	25	46359	13824	0	2	1	0	50	18	1517076	0.232323	1
APOBEC1	237142	672	14	47331	11718	0	1	0	0	50	31	1720251	0.232525	1
INTS9	396951	403	42	129681	36126	0	4	1	0	50	19	1805490	0.232671	1
GPR65	115758	976	-36	64908	17226	0	1	0	0	50	16	1852335	0.232735	1
CCS	1343990	194	62	53595	15660	0	2	0	0	50	31	1517022	0.232973	1
ZNF425	605000	242	27	146313	37638	0	6	1	0	36	25	1391391	0.233126	1
ATXN7	156786	683	8	183870	55242	0	3	0	0	43	18	1891647	0.233167	1
KCTD13	NaN	NaN	NaN	61965	19845	0	2	0	0	50	49	3026673	0.233205	1
MRPS21	1213150	197	38	17685	4347	0	1	0	0	50	22	1598130	0.233205	1
H2AFY2	484729	425	25	72468	20763	0	2	0	0	50	18	1658448	0.233516	1
SERINC3	781823	276	46	92799	25623	0	5	1	0	19	14	611820	0.233613	1
SOBP	288292	592	36	163107	51219	0	7	3	0	33	11	862893	0.233733	1
KIAA1432	311104	473	36	268461	72306	0	5	1	0	50	13	1394631	0.233888	1
HIF1A	252998	315	30	163647	41850	0	5	1	0	50	20	1328805	0.233946	1
MAL2	247332	442	-1	33453	10773	0	1	0	0	50	21	1603800	0.234116	1
CDC25A	1116598	151	36	104355	27756	0	3	0	0	50	29	1803735	0.234494	1
FBXO7	371339	401	3	102438	30402	0	3	0	0	50	14	1448469	0.234496	1
JPH1	236544	478	-15	126360	36288	0	3	1	0	50	24	1641681	0.234575	1
TMEM150A	1158965	170	43	52083	15957	0	2	0	0	32	19	1073790	0.234627	1
GOLIM4	147581	681	-8	141777	32454	0	3	2	0	24	6	920133	0.234732	1
SERPINB12	190401	339	20	80379	20061	0	2	0	0	50	18	1514241	0.234894	1
FCHSD1	771583	353	25	133974	40257	0	4	1	0	50	20	1743795	0.234908	1
NOS1AP	372116	410	2	101250	29079	0	2	1	0	50	13	1561734	0.235066	1
SH3RF3	266032	464	13	142749	47520	0	4	1	0	50	20	1275723	0.235102	1
S100A5	1454773	186	26	22734	5211	0	1	0	0	50	25	1469583	0.235105	1
LOH12CR1	707022	279	27	38583	10260	0	2	0	0	50	32	2050245	0.235303	1
CRIM1	267484	414	-1	203094	54243	0	4	1	0	50	13	1567809	0.235316	1
SH2D1B	363646	391	1	26595	6696	0	1	0	0	50	13	1485729	0.235412	1
HINT2	847663	227	54	31266	10206	0	1	0	0	50	30	1566486	0.235609	1
SSX5	590474	NaN	11	47331	11151	0	2	0	0	50	18	1527930	0.23567	1
WDR53	1180405	156	30	68256	19791	0	2	0	0	50	28	1526715	0.23579	1
UBXN4	511712	403	25	101088	26487	0	3	0	0	22	4	558063	0.235924	1
FOXP2	42204	828	-13	153738	38961	0	3	0	0	50	20	2133108	0.236054	1
DMRTA2	147973	639	-7	62829	24003	0	1	0	0	50	17	1930743	0.236235	1
LY6G6C	2517236	193	20	24192	7236	0	1	0	0	50	59	2083023	0.236355	1
IMPACT	144714	390	16	66015	15228	0	2	0	0	50	18	1330857	0.236513	1
CYLC2	13384	1215	-31	70254	16011	0	1	0	0	50	15	1947672	0.236706	1
ESYT1	2878044	171	40	215757	64908	0	5	2	0	40	12	1218159	0.236718	1
CYP4F11	843515	575	12	103248	28134	0	3	0	0	50	16	1644462	0.23672	1
OXSM	217009	717	-3	86103	26487	0	2	0	0	50	14	1628478	0.236953	1
DPPA5	732413	446	18	22977	6264	0	1	0	0	50	31	1534032	0.236964	1
TMCC1	614377	357	40	124443	35451	0	2	0	0	50	24	1866024	0.237058	1
FXYD5	745516	357	-9	35640	10287	0	2	1	0	50	22	1354320	0.237063	1
TMEM45A	346650	411	7	54216	14472	0	2	0	0	50	18	1358640	0.237063	1
GPR162	2822601	232	32	108405	37071	0	4	0	0	24	10	783486	0.237112	1
CRYGS	676664	501	35	35586	8721	0	1	0	0	50	34	1906497	0.23714	1
SHKBP1	820124	226	40	135621	42093	0	7	2	0	50	35	1606635	0.237317	1
KDM3A	625501	424	22	260226	69120	0	9	1	0	50	33	1799982	0.237435	1
RNF44	607190	318	49	82458	26001	0	2	0	0	47	17	1286928	0.237446	1
CDC37	1956832	207	38	76221	18144	0	3	0	0	50	30	1782108	0.237513	1
HHIPL1	375738	250	21	153360	47682	0	4	1	0	50	14	1630233	0.237582	1
DYRK2	232901	596	-9	113481	33453	0	3	1	0	50	23	1977264	0.237635	1
CHST9	48644	872	-24	88155	21357	0	3	0	0	50	16	1415988	0.237668	1
KLHL2	171218	540	5	121176	30942	0	3	0	0	32	13	947916	0.23772	1
SKA1	277376	392	52	51651	12501	0	1	0	0	40	10	1241622	0.237786	1
CCL4L2	691971	684	13	36396	10422	0	1	0	0	50	19	1574505	0.237913	1
OR10H2	878287	605	13	58185	18927	0	1	0	0	50	13	1598778	0.238022	1
AKR1C4	630098	678	-21	64530	16956	0	2	0	0	50	25	1353105	0.238067	1
FGF23	295315	860	33	47601	14283	0	1	0	0	50	9	1299672	0.23842	1
ADAM12	214443	485	-29	184842	52002	0	5	1	0	50	29	1719252	0.238483	1
ACVR2B	337567	514	28	99711	28350	0	4	0	0	50	25	1824174	0.238645	1
ZNF146	923127	419	-26	57537	13662	0	2	0	0	34	18	1194345	0.238768	1
SLC46A3	167695	629	37	89343	25515	0	2	0	0	50	16	1273995	0.238854	1
SUCNR1	200470	526	2	63936	18117	0	1	0	0	50	23	1794420	0.238856	1
CNTNAP1	1740597	177	36	265086	78921	0	10	1	0	48	28	1610523	0.238931	1
PGK2	67972	1246	2	78489	23085	0	1	0	0	17	0	573345	0.238984	1
SLC35F2	392825	538	12	72522	20871	0	2	0	0	50	30	1527444	0.239086	1
POU5F2	263452	587	3	60264	19845	0	3	0	0	50	33	1617732	0.23926	1
HYI	1044061	239	35	53757	16227	0	3	0	0	50	32	1404594	0.239291	1
BAG2	314024	348	23	41256	10908	0	1	0	0	50	20	1711017	0.239433	1
SLC39A6	365879	399	35	148608	38988	0	5	3	0	26	12	797445	0.239582	1
OR2T29	116628	850	-20	58050	17280	0	2	1	0	24	11	589626	0.239984	1
RSPO2	187803	942	-9	49329	11259	0	1	0	0	50	18	1563786	0.240197	1
ENPP5	62118	819	16	92880	24246	0	2	1	0	50	22	1488159	0.240284	1
FUT6	1217326	294	35	67662	20142	0	5	2	0	22	16	699570	0.240329	1
AMN1	313930	228	11	50841	14040	0	1	0	0	50	15	1548693	0.240421	1
MRPL27	1335838	196	24	28647	8856	0	1	0	0	50	24	1741338	0.240518	1
SPOP	943930	348	28	74925	19116	0	3	0	0	50	33	1429029	0.241251	1
PGPEP1L	217299	248	-20	37557	11610	0	2	0	0	50	34	1669977	0.241315	1
ARL5B	74299	539	-5	36207	9153	0	1	0	0	50	11	1702080	0.241515	1
DYNLT1	623771	306	49	23787	5373	0	1	0	0	50	14	1375758	0.24161	1
QRFP	727815	241	22	24840	8370	0	2	1	0	21	13	603369	0.241619	1
PPP2R3C	640994	321	45	92745	21465	0	2	1	0	50	25	1515375	0.241885	1
SVOPL	256342	480	9	95688	28647	0	2	0	0	50	21	1549422	0.242007	1
SYT10	93167	905	-41	101682	27594	0	2	0	0	50	10	1266732	0.24203	1
NTRK2	17424	692	1	170208	44928	0	3	2	0	48	13	1548234	0.242031	1
CHRM1	2342595	181	71	84483	27864	0	5	0	0	45	32	1685961	0.242047	1
IL6ST	317374	438	51	181548	46629	0	4	0	0	45	19	1699596	0.242331	1
MON1B	60048	1058	-19	100548	34236	0	3	1	0	42	18	1348137	0.242586	1
FSTL4	599945	623	42	162783	46926	0	3	1	0	50	22	1678617	0.242691	1
MMP19	1909014	256	38	97983	28296	0	3	0	0	50	33	1766259	0.243217	1
TKTL2	74744	1164	-26	116856	35505	0	3	0	0	49	27	1621917	0.243352	1
ZMAT1	262044	NaN	16	127116	29943	0	2	0	0	50	22	1754811	0.243462	1
NDUFB2	329944	567	29	21087	5805	0	1	0	0	50	23	1888137	0.243574	1
HOXA9	473864	394	13	51192	15633	0	2	0	0	50	44	1943406	0.24362	1
SPDYE1	1042621	239	49	66744	17091	0	2	0	0	50	28	1470447	0.244187	1
SLC10A3	2163759	NaN	42	85806	30348	0	5	1	0	50	49	1676349	0.244207	1
PLAC8	361292	169	58	23517	5967	0	1	0	0	50	33	1608984	0.244269	1
PLCXD1	NaN	NaN	NaN	62181	18495	0	2	1	0	50	50	3025323	0.244711	1
ELMOD2	125708	752	7	60777	13257	0	1	0	0	50	15	1817397	0.244837	1
NOP14	680459	336	49	170208	44280	0	6	0	0	50	16	1331451	0.244927	1
LRP4	1227153	268	38	374220	100926	0	11	2	0	48	25	1447443	0.245209	1
REPIN1	315538	514	32	115290	37395	0	6	1	0	50	28	1870101	0.245323	1
MED28	271066	989	32	34776	9855	0	1	1	0	45	13	1225611	0.245334	1
PDP1	319459	423	5	113697	31860	0	3	1	0	50	21	1411317	0.245751	1
GRIA1	67092	914	-3	185166	49734	0	3	0	0	50	12	1468395	0.246054	1
TCEA2	1092168	208	49	59211	16605	0	3	0	0	50	33	1639332	0.24622	1
MAFF	1604692	184	68	30213	10530	0	1	0	0	50	27	1710180	0.246356	1
DNTT	780047	804	30	101007	26163	0	2	0	0	29	14	1056240	0.246357	1
EFCAB1	16699	533	-28	43470	9990	0	1	0	0	50	21	1527471	0.24692	1
HDDC2	155442	373	-19	40770	10665	0	1	0	0	50	22	1662687	0.247011	1
PAGE1	355308	NaN	14	29943	7560	0	1	0	0	50	16	1899153	0.247021	1
RBM12B	221692	552	-4	191079	52731	0	5	0	0	30	7	800577	0.247859	1
CASP5	45234	626	-20	89208	22734	0	4	1	0	38	26	1136700	0.248015	1
TMEM39B	1242874	218	24	94446	27945	0	3	0	0	50	17	1616571	0.248539	1
CD79A	1360684	454	23	44064	12393	0	2	1	0	50	30	1418175	0.248633	1
CSNK1E	1550040	181	63	81378	23193	0	3	0	0	50	26	1447902	0.248708	1
SEMA3F	905995	196	40	151902	44928	0	7	1	0	20	12	669006	0.248712	1
CPSF3L	1744013	273	28	118800	32589	0	6	1	0	50	45	1729080	0.248769	1
HIGD1A	369545	396	31	21870	5670	0	1	0	0	50	17	1449738	0.249149	1
MYL7	1151124	282	56	36180	8856	0	1	0	0	50	37	1763073	0.249219	1
RSL1D1	558203	294	37	95904	26163	0	2	0	0	49	15	1377783	0.24939	1
MIXL1	739974	278	21	42039	14823	0	1	0	0	50	25	1700001	0.249434	1
LRP12	36110	1085	15	165618	45306	0	3	0	0	50	16	1737288	0.249639	1
IMPA2	336901	181	48	55566	16929	0	2	0	0	50	26	1347273	0.249782	1
HRG	508316	436	45	102438	27486	0	3	1	0	50	31	2121795	0.250054	1
MAST2	1003923	416	24	341307	105084	0	9	0	0	6	0	357399	0.250157	1
ZNF488	117080	445	21	61938	20925	0	2	0	0	50	14	1540782	0.250239	1
ZNF33A	139504	916	-19	161433	37179	0	4	0	0	50	18	1703214	0.250295	1
AP4M1	1401098	205	46	88236	26784	0	4	0	0	50	26	1890567	0.250516	1
TCEAL5	455954	NaN	17	40662	9963	0	1	0	0	50	20	1738935	0.250543	1
TRIB1	322911	193	40	69174	22113	0	4	2	0	22	12	507924	0.250584	1
ELAC1	189022	332	51	69336	20088	0	2	1	0	50	17	1354266	0.250778	1
FAM84A	58286	1274	-10	54729	16794	0	1	0	0	50	18	1664685	0.250805	1
CASP2	379804	372	21	89667	23652	0	2	0	0	50	17	1687014	0.251155	1
OR10A3	105341	679	6	58698	17766	0	1	0	0	40	13	1625076	0.251373	1
GPR52	NaN	NaN	NaN	68364	19764	0	2	1	0	50	50	3026592	0.251417	1
SLC1A7	509533	391	21	106137	33426	0	3	1	0	50	25	1752111	0.251869	1
YWHAH	531528	344	-1	47520	12825	0	1	0	0	50	23	1506924	0.252066	1
SLC25A28	383678	436	18	68310	21357	0	1	0	0	50	21	1664388	0.252216	1
WFDC12	865186	324	46	22167	5859	0	1	0	0	48	45	1947726	0.252549	1
TNFRSF11B	179358	381	9	79488	19494	0	3	1	0	50	21	1517022	0.25259	1
C17orf72	NaN	NaN	NaN	36801	11151	0	1	0	0	50	49	3017979	0.252655	1
DNAJC28	884788	182	63	76275	18576	0	2	0	0	50	20	1247292	0.253097	1
ORM2	206775	425	4	40419	10287	0	1	0	0	50	16	1416690	0.253118	1
FAM47B	6541	NaN	-14	120339	36801	0	3	3	0	38	20	1339497	0.253159	1
MCOLN1	609287	308	36	112347	33048	0	6	0	0	50	31	1786968	0.253199	1
SMARCB1	637355	196	52	76140	20250	0	4	0	0	50	34	1556415	0.253254	1
CDHR5	1774224	236	57	157707	52407	0	4	0	0	35	10	939492	0.253837	1
ALDH8A1	152922	364	19	93933	26757	0	2	0	0	50	15	1482165	0.253855	1
TBX6	2171952	164	62	81972	26811	0	3	1	0	50	39	1790586	0.253857	1
RFX5	1322568	174	42	115857	36990	0	3	0	0	50	27	1772874	0.254137	1
PRRT2	NaN	NaN	NaN	62991	20844	0	3	0	0	50	49	3027672	0.254146	1
IMPG1	187724	674	-13	157626	41472	0	3	0	0	43	17	1865241	0.254199	1
KRTAP4-7	NaN	NaN	NaN	30024	7884	0	3	1	0	4	1	106839	0.254697	1
PPP1CC	796153	347	50	64503	16173	0	2	0	0	35	25	1204956	0.254785	1
RAMP1	571081	382	23	28350	8505	0	1	0	0	50	30	1700865	0.254862	1
MCTP2	46228	457	-17	179847	46710	0	4	0	0	45	22	1302723	0.255278	1
C7orf31	254281	319	21	116586	29943	0	3	1	0	50	23	1628586	0.255387	1
ECHDC1	120722	889	-4	61722	14904	0	1	1	0	50	24	1665036	0.255507	1
TMEM126A	325720	554	-19	38259	10827	0	1	0	0	50	24	1875285	0.255708	1
DNM1L	307288	308	-5	144720	40527	0	4	1	0	18	11	743526	0.255769	1
GSTA1	539666	498	11	44847	11286	0	2	0	0	50	35	1636794	0.256103	1
HMGB4	131426	852	9	36234	9369	0	1	0	0	50	18	1595349	0.256398	1
TNS1	500812	399	23	329913	101007	0	8	1	0	50	16	1670679	0.256488	1
GZMB	853527	610	-12	48222	13500	0	2	0	0	50	39	1865322	0.256841	1
MCPH1	128440	702	9	164565	43443	0	2	0	0	50	20	2080944	0.256895	1
RPL23A	1695792	208	40	31104	8505	0	1	0	0	50	37	1935387	0.256909	1
DHX30	843941	197	34	227610	70470	0	10	0	0	24	8	729054	0.256967	1
DRD4	1774224	236	57	75222	27972	0	2	0	0	50	15	1355130	0.257079	1
OR4C12	11630	1171	-38	58401	17253	0	1	0	0	50	12	1596294	0.257167	1
NKD1	307084	646	-6	91152	26217	0	3	1	0	50	25	1759185	0.257227	1
NCAM1	68889	524	-1	181440	49329	0	2	1	0	50	15	1801710	0.25738	1
STK17A	655380	310	23	80838	21951	0	2	0	0	50	28	1929582	0.257652	1
TUBA4A	694442	193	44	85644	24921	0	4	1	0	50	39	1737207	0.257763	1
ITPRIP	293891	376	8	102330	31158	0	2	0	0	50	15	1555821	0.257869	1
OR6K6	103627	985	1	64584	19008	0	2	0	0	14	2	315063	0.257978	1
PLA2G2E	437659	348	22	28269	7614	0	1	0	0	50	13	1418391	0.258328	1
MTF1	445066	303	33	144207	42255	0	5	1	0	21	4	546642	0.258401	1
CDX1	1002307	228	49	48870	16578	0	2	0	0	50	30	1508409	0.258491	1
CENPH	422005	232	38	51678	11340	0	1	0	0	50	19	1445337	0.258835	1
AOC2	1631295	190	28	139995	45090	0	3	1	0	50	26	1621728	0.259127	1
TADA2B	459652	426	70	79866	22761	0	6	1	0	50	40	1465614	0.259263	1
POU2F1	399046	569	0	141345	44307	0	3	0	0	23	8	816993	0.259354	1
SGTA	1354357	291	25	63531	16335	0	2	1	0	50	23	1631961	0.259506	1
CPEB4	164298	381	43	141237	39069	0	3	1	0	50	18	1635309	0.259515	1
USP51	92250	NaN	8	135432	37908	0	3	0	0	50	20	1969218	0.259786	1
CXCR1	718028	301	27	65016	20601	0	3	1	0	9	4	354078	0.260078	1
PTPN6	2704950	211	47	128277	34290	0	5	2	0	36	33	1538649	0.260474	1
EVI2A	NaN	NaN	NaN	49788	14040	0	1	0	0	50	49	3020868	0.260629	1
SLCO6A1	132386	647	-12	140400	38772	0	2	0	0	50	12	1832004	0.260672	1
TROVE2	288840	433	-13	109917	28431	0	3	1	0	50	23	1368765	0.260881	1
TDGF1	277267	528	52	37800	10233	0	1	0	0	50	17	1348569	0.26091	1
XPC	308100	258	33	115776	32616	0	4	0	0	50	18	1293435	0.261097	1
PAQR4	1443513	234	49	49491	17739	0	2	0	0	50	35	1437480	0.261106	1
ALDH9A1	321831	408	0	100764	28593	0	2	0	0	50	17	1660230	0.261381	1
SGCB	114535	815	8	63018	16281	0	1	0	0	50	12	1690443	0.261647	1
TRIM13	337743	357	44	79407	20790	0	1	0	0	50	12	1562571	0.261754	1
ATP4B	723091	370	36	58212	14850	0	3	1	0	41	35	1310256	0.261805	1
ZNF22	79469	905	15	44280	10719	0	1	0	0	50	17	1573587	0.261856	1
ZWINT	65824	1191	-19	55512	14796	0	2	0	0	50	34	1681425	0.261867	1
TWSG1	499362	387	43	44874	10854	0	1	0	0	50	18	1550421	0.261933	1
THOC7	153669	826	-6	42444	9639	0	2	0	0	50	22	1466802	0.261943	1
C1GALT1C1	388105	NaN	7	62775	15390	0	2	0	0	50	27	1516968	0.262263	1
SCGB1A1	3053973	413	49	18333	4833	0	1	0	0	50	44	1514727	0.262374	1
GYS2	510830	830	-17	139158	36774	0	4	2	0	50	22	1181250	0.262465	1
KIAA0195	1928925	195	19	262197	77274	0	9	0	0	25	7	890676	0.262852	1
AK1	1278941	201	51	38367	10962	0	1	0	0	50	22	1692036	0.262857	1
CHAC1	1049616	176	50	49383	15822	0	2	0	0	50	35	1644948	0.262873	1
PIGW	416822	556	23	94554	28485	0	3	1	0	50	27	2095794	0.263262	1
FAM8A1	470794	339	13	76788	25110	0	4	1	0	50	30	1794933	0.263546	1
TEKT4	167705	749	-6	83457	24435	0	8	2	0	5	4	149850	0.263646	1
PNPLA2	1799017	232	51	94446	30861	0	3	1	0	50	22	1423089	0.264055	1
CAPS	1166723	392	36	36936	10854	0	1	0	0	50	26	1362528	0.264274	1
COX7B	549293	NaN	19	16308	4185	0	1	0	0	50	32	1805706	0.264367	1
SDS	444479	276	36	62883	19332	0	1	0	0	50	22	1531737	0.264437	1
OR5AC2	200002	811	-15	58023	17145	0	1	0	0	50	17	1599399	0.264512	1
FCRLB	598281	504	20	79299	26244	0	2	0	0	50	26	1418337	0.264589	1
MLC1	909819	215	25	73224	22194	0	2	0	0	50	21	1167453	0.264823	1
TGM1	915114	220	38	156762	46548	0	4	1	0	50	21	1598589	0.26505	1
SDF2L1	521773	194	37	41607	13149	0	1	0	0	50	23	1476414	0.265197	1
RBM27	394957	229	31	206955	57348	0	6	0	0	40	12	1255311	0.265279	1
OTUB1	1322584	277	42	54243	13797	0	3	0	0	50	46	2032209	0.265312	1
USP21	728669	234	37	106758	34668	0	10	2	0	17	12	507141	0.265448	1
BCAS1	163555	415	2	113454	32265	0	2	0	0	27	6	840402	0.265526	1
C8orf74	110362	481	9	56241	16578	0	1	0	0	50	12	1699110	0.265692	1
LSM2	2509866	183	32	19494	5130	0	1	0	0	50	25	1703781	0.26572	1
PLSCR1	123426	671	-12	63936	16173	0	1	0	0	50	16	1973079	0.26573	1
FBXO8	64734	647	-5	63504	15876	0	1	0	0	50	12	1556793	0.265817	1
SPOCK3	7931	1043	-11	89262	20331	0	2	0	0	39	16	1510218	0.266222	1
DNAJC14	1909014	256	38	133380	39393	0	6	1	0	50	33	1766259	0.266327	1
TSSC1	255965	619	-1	76896	19980	0	2	1	0	50	26	1488213	0.266459	1
CLCN3	186100	464	12	170127	44766	0	4	2	0	30	12	987282	0.267349	1
CTSS	1818753	188	35	65907	16956	0	2	0	0	50	25	1772901	0.267471	1
GPR137C	356488	313	14	81540	24894	0	2	0	0	50	20	1727919	0.267645	1
ZNF547	432083	869	-17	78948	19953	0	2	0	0	50	15	1374354	0.267802	1
USP5	2822601	232	32	169128	46089	0	5	1	0	50	25	1567080	0.267827	1
PEX14	819616	392	27	73629	20979	0	3	1	0	21	11	596808	0.26791	1
ZDHHC7	481076	273	28	67473	18873	0	2	1	0	39	21	1238463	0.268087	1
OR1G1	445889	579	-8	58590	17712	0	1	0	0	50	8	1131975	0.268099	1
CSTF2T	NaN	NaN	NaN	113535	36558	0	3	2	0	50	51	3043386	0.268595	1
ZBED2	188186	406	-14	41688	11529	0	1	0	0	50	22	1663065	0.26883	1
CASQ1	841605	386	29	79893	19818	0	3	1	0	50	24	1443933	0.268871	1
RCL1	238716	573	26	72009	21465	0	2	0	0	50	28	1777113	0.269043	1
TRH	329991	389	43	45738	13959	0	1	0	0	50	15	1634823	0.269069	1
SOCS5	630448	252	34	103113	27702	0	6	1	0	50	24	1367874	0.269113	1
FAM180A	470926	386	-1	32940	9990	0	1	0	0	50	10	1258794	0.269383	1
POLR1C	1278255	230	56	74925	21141	0	4	0	0	50	30	1513512	0.269621	1
WDR43	478715	398	26	135405	35019	0	2	1	0	50	21	1835109	0.269815	1
BOLA1	798975	560	17	24840	9018	0	1	0	0	50	20	1737261	0.269836	1
SIAH1	170149	392	3	59400	17226	0	1	0	0	25	2	754353	0.269856	1
C3AR1	142724	300	23	90396	27297	0	2	1	0	50	19	1557873	0.269958	1
AP1G1	460697	NaN	24	163539	44631	0	4	0	0	11	5	611091	0.270003	1
ACN9	146007	987	-9	24408	6534	0	1	0	0	50	18	1550097	0.270091	1
CDC34	1647685	255	-8	46008	12879	0	2	0	0	50	24	1423332	0.27014	1
OR51D1	212267	935	-3	59508	19791	0	1	0	0	50	14	1618677	0.270238	1
ITPA	997984	255	52	39177	10476	0	2	0	0	50	36	1439559	0.270429	1
OR5P3	103028	823	-1	57861	17874	0	1	0	0	50	14	1692468	0.270432	1
PDCD2L	689668	292	2	70173	19332	0	2	0	0	50	52	2227257	0.270564	1
DPH2	875223	214	39	89397	31293	0	4	0	0	19	8	546723	0.27064	1
IFT46	1359480	167	47	72414	17658	0	1	0	0	50	12	1739853	0.270887	1
PLP2	724395	NaN	44	29430	9045	0	2	0	0	50	38	1599480	0.271108	1
TYW3	104029	1055	-14	52542	12582	0	1	0	0	50	31	2027889	0.271263	1
PHF1	1441897	236	31	115506	27054	0	4	0	0	12	3	410346	0.271774	1
MCF2	68546	NaN	-2	210087	49032	0	2	0	0	50	7	1490130	0.271818	1
APBA1	209495	673	-5	162243	45279	0	3	1	0	50	14	1768419	0.271878	1
MBD2	98718	437	6	91044	27945	0	1	0	0	31	3	878931	0.271881	1
INSL6	351963	629	20	41499	11151	0	1	0	0	50	22	1532493	0.272439	1
USF1	689033	250	23	61587	17226	0	2	0	0	50	31	1446363	0.272529	1
GRIN3A	111816	1063	-27	212247	61533	0	4	0	0	12	4	786456	0.272529	1
TADA1	258555	773	-7	65718	18198	0	1	0	0	50	18	1844910	0.272553	1
PDGFA	598406	318	9	42741	11772	0	2	0	0	50	41	2223774	0.272594	1
ZNF552	884988	781	-38	79893	19899	0	2	0	0	50	26	1286793	0.272759	1
FIBIN	176115	648	-17	40014	11502	0	1	0	0	50	30	1938573	0.272829	1
HAO1	67871	715	-23	71820	20763	0	2	0	0	50	30	1568538	0.272979	1
SECTM1	2856070	193	24	47223	14580	0	2	1	0	27	19	780489	0.27301	1
TPST1	551438	412	26	71604	20088	0	2	0	0	50	23	1623078	0.273159	1
ARID5B	81587	388	20	228609	63234	0	3	0	0	42	7	1395117	0.273191	1
TUBA3D	455705	540	29	85752	25299	0	6	0	0	8	1	154116	0.273314	1
CRKL	523674	192	49	57186	17334	0	2	0	0	50	25	1472742	0.273492	1
RGS10	825813	217	22	38178	8397	0	1	0	0	50	14	1102572	0.273612	1
GP5	324325	269	27	100926	35721	0	2	1	0	17	8	683964	0.273639	1
ABTB1	679358	336	45	93123	27000	0	3	0	0	42	21	1461267	0.273804	1
MCAT	624112	241	48	73818	22329	0	2	1	0	29	15	989361	0.273829	1
CTCFL	181464	562	10	131652	32940	0	3	0	0	50	14	1696950	0.273958	1
GRXCR2	394778	568	-4	48573	12582	0	1	0	0	50	12	1238652	0.274052	1
TMEM51	379959	432	16	47601	14445	0	2	0	0	50	19	1541565	0.274091	1
TMEM71	166227	872	-6	59778	15066	0	1	0	0	50	21	1628316	0.274102	1
ACSS1	572146	563	-18	132678	39204	0	3	2	0	50	22	1555767	0.274217	1
DCAF12L1	11311	NaN	-16	85266	27810	0	3	2	0	36	17	1192158	0.274449	1
ACVR2A	90992	951	-2	102087	26055	0	1	0	0	50	9	1554120	0.2747	1
PHF20L1	195342	773	-4	209574	52056	0	3	1	0	50	16	1479546	0.274723	1
PAX4	411207	619	-7	64935	21249	0	1	0	0	50	10	1141317	0.274793	1
GLB1L2	270422	686	5	125874	34749	0	3	0	0	50	21	1595889	0.275248	1
RPS6KA3	242944	NaN	36	148473	38394	0	4	0	0	50	15	1366443	0.275257	1
FAM159A	663153	261	19	37071	10314	0	1	0	0	50	22	1354428	0.275307	1
MMP24	1290513	170	45	108918	30564	0	3	2	0	25	6	701217	0.275356	1
YIPF2	2009333	193	41	60912	19035	0	2	0	0	50	29	1655100	0.275709	1
BCL6	88374	374	24	136269	38124	0	3	0	0	50	12	1556982	0.275759	1
CAPN2	528883	407	2	140940	36288	0	4	0	0	50	21	1554552	0.27583	1
OR10H3	878287	605	13	59292	17577	0	1	0	0	50	13	1598778	0.275911	1
LEPREL1	165372	399	3	137997	38826	0	2	0	0	22	2	693036	0.276	1
LEMD3	299752	577	7	174447	51219	0	6	0	0	27	11	875880	0.276342	1
UPP2	115042	838	-4	73845	20034	0	2	1	0	50	22	1451898	0.276545	1
ERMN	78933	837	8	59643	13743	0	1	0	0	50	15	1800792	0.276559	1
ARRDC1	1197708	478	45	81702	26190	0	3	2	0	24	28	972675	0.276573	1
TMTC1	99753	510	-15	152037	41796	0	4	1	0	50	33	2045736	0.276615	1
TMEM38A	980514	362	41	57996	16686	0	2	0	0	50	36	1644732	0.276665	1
SLC16A1	601487	276	16	94878	28161	0	2	0	0	50	11	1415556	0.276789	1
CENPBD1	1056657	221	35	35829	9855	0	1	0	0	50	35	1243377	0.276834	1
SEMA3C	114018	419	-27	149256	38988	0	4	0	0	39	14	1367064	0.276884	1
TRIM59	435184	513	16	78543	19953	0	2	0	0	50	24	1646136	0.277158	1
SOHLH2	81451	880	-44	84186	22734	0	1	0	0	50	11	1300725	0.277365	1
LBX1	572649	418	43	51975	16875	0	1	0	0	50	26	1833975	0.277463	1
PUM1	498145	189	36	229797	65934	0	7	2	0	50	22	1431675	0.277641	1
GRIK3	361850	626	30	178011	50409	0	3	1	0	50	17	1649511	0.277867	1
ZNF90	NaN	NaN	NaN	118449	28809	0	4	1	0	50	50	3035637	0.277881	1
KRT74	1280474	464	36	101871	29673	0	3	0	0	19	10	717282	0.278171	1
NARF	2583801	179	20	99414	26379	0	4	1	0	50	42	2020950	0.278229	1
NIPSNAP3B	194451	718	-21	49140	12906	0	2	0	0	50	29	1642221	0.278308	1
SNRPD2	950605	194	45	23544	6183	0	1	0	0	50	18	1442475	0.278444	1
CLDN7	1782958	316	21	41472	11016	0	1	0	0	50	22	1260549	0.278655	1
MTRR	66042	1013	-9	141507	39933	0	2	0	0	50	11	1604664	0.278855	1
IL24	467839	385	39	43470	8856	0	2	0	0	50	31	1718442	0.279144	1
ZNF8	1546372	406	-39	110700	30240	0	3	1	0	36	18	1002213	0.279166	1
GNA14	180930	608	-10	70578	17874	0	1	0	0	50	13	1877742	0.279308	1
ACCS	345807	680	3	99036	27324	0	3	0	0	50	25	1632042	0.279389	1
GLYATL2	285727	673	-11	59670	13635	0	1	0	0	50	18	1634850	0.279468	1
NTF3	28523	735	17	51327	15012	0	1	1	0	37	11	1115451	0.279516	1
MCEE	355097	470	40	33804	10179	0	1	0	0	50	24	1505007	0.279583	1
P2RX7	1061231	396	46	118314	30564	0	3	0	0	50	30	1433754	0.279702	1
SOCS2	359700	369	30	37395	11286	0	1	1	0	26	9	699759	0.279786	1
HNRNPUL1	1186597	214	24	166644	46143	0	6	1	0	50	19	1709613	0.279893	1
COMMD1	563800	420	26	36828	10395	0	1	0	0	50	26	1756242	0.280122	1
GATA3	182932	675	-2	83754	25677	0	4	1	0	14	3	342279	0.280693	1
FOXP4	461476	388	43	131598	39069	0	3	0	0	38	10	999810	0.280856	1
ALPPL2	307666	204	37	101466	31455	0	3	0	0	50	20	1240245	0.280955	1
C8orf44	372262	213	38	31131	8397	0	1	0	0	50	26	1478493	0.281183	1
SYT14	223343	547	-5	122580	31158	0	2	0	0	50	19	1627506	0.281467	1
LY6E	795935	470	13	25434	7938	0	1	0	0	50	28	1288575	0.281569	1
YWHAG	850568	195	53	47736	12852	0	2	0	0	50	29	1614924	0.28173	1
CCK	338797	473	29	21870	6966	0	1	0	0	50	23	1651509	0.281785	1
RIMKLB	302894	262	17	74223	21438	0	2	0	0	50	21	1589868	0.28179	1
VEGFC	145765	585	-14	82944	21303	0	1	0	0	50	9	1648593	0.282004	1
ADM	860704	273	12	35127	11043	0	1	0	0	50	29	1833381	0.282026	1
HIST1H2BA	272695	635	29	24111	7155	0	1	0	0	50	16	1309365	0.282046	1
LONP1	935129	225	23	183465	55485	0	6	1	0	50	20	1168695	0.282208	1
AEN	393645	605	14	61614	18576	0	2	0	0	50	26	1664874	0.282356	1
ADIPOR1	421206	389	30	72873	20763	0	1	0	0	50	10	1563462	0.282386	1
FGF19	465152	561	38	40770	12609	0	1	0	0	50	20	1531251	0.28255	1
RNF133	53042	1027	6	71793	19980	0	1	1	0	50	14	1752435	0.282641	1
RWDD2A	153997	734	6	56835	14688	0	1	0	0	50	20	1862595	0.282669	1
SNUPN	594867	165	39	71928	18387	0	1	1	0	50	21	1592811	0.2828	1
SRPR	385871	426	29	124281	35208	0	3	0	0	38	17	1383210	0.283006	1
TANK	207004	370	26	85428	22869	0	2	0	0	50	16	1703214	0.283049	1
TRPC1	414031	437	20	149499	38745	0	3	0	0	50	19	1780704	0.283355	1
FANCF	52076	970	-4	68472	22815	0	1	0	0	50	13	1422576	0.28343	1
BFSP2	342402	497	14	79434	23598	0	2	0	0	50	20	1683396	0.283884	1
VTI1B	479937	260	39	45360	12879	0	2	0	0	50	18	1352943	0.284093	1
TIAM2	120675	362	27	329292	92070	0	7	1	0	50	12	1521693	0.284117	1
NRSN2	879317	185	41	38367	12096	0	2	0	0	50	36	1588923	0.28413	1
ZNF431	173248	1093	-42	114669	26838	0	5	1	0	29	9	793611	0.284151	1
SMAP2	718633	438	37	85185	22383	0	4	0	0	50	40	1488969	0.284255	1
FGF17	584373	219	34	42471	11718	0	2	0	0	50	32	1617732	0.284311	1
RCVRN	63518	366	-41	39555	9936	0	1	0	0	50	11	1533546	0.284772	1
NMUR2	261658	955	4	79353	22707	0	1	0	0	50	15	1838025	0.284808	1
CYB5R3	858524	189	74	67851	18171	0	2	0	0	50	20	1647270	0.284859	1
LCN2	1762678	201	44	39960	10503	0	2	0	0	50	29	1460700	0.28495	1
YPEL5	141747	692	18	23571	6723	0	1	0	0	50	18	1405080	0.284957	1
ZNF467	471461	615	29	111591	34533	0	2	0	0	10	2	653562	0.285043	1
OR51B4	100115	1056	1	58023	17469	0	1	0	0	18	0	344763	0.285056	1
XKR6	125681	704	26	119043	37773	0	2	0	0	42	33	3265920	0.285095	1
SDAD1	486576	399	44	140724	33264	0	2	1	0	50	16	1415232	0.285163	1
MGLL	587659	313	51	60399	18171	0	1	0	0	50	15	1396602	0.285305	1
CD164L2	847257	188	26	34128	9612	0	1	1	0	25	7	451467	0.285452	1
C1orf109	445023	375	27	39528	11340	0	1	0	0	50	20	1465101	0.285998	1
ADAM21	423685	706	22	138294	37395	0	2	0	0	32	9	1427625	0.286085	1
NRP1	360090	488	-9	182790	47817	0	4	0	0	50	30	1961766	0.286128	1
AGTR2	224760	NaN	7	69120	19656	0	2	2	0	25	13	699435	0.286162	1
OLIG3	210173	486	29	50220	16119	0	1	0	0	50	21	1531251	0.286214	1
TPP1	424523	491	17	108189	32913	0	2	0	0	50	20	1711125	0.286236	1
TDRD5	599875	613	-9	191592	52218	0	4	0	0	50	11	1604556	0.286251	1
CCDC140	235091	682	12	30699	9153	0	1	0	0	50	22	1420902	0.286331	1
CYP2W1	765060	346	34	90153	31914	0	3	1	0	50	35	1582146	0.2864	1
RCAN3	470059	348	28	48033	12069	0	1	0	0	11	3	484677	0.286569	1
LYSMD4	173729	507	16	57132	16578	0	1	0	0	50	17	1406997	0.286587	1
CDK16	819569	NaN	38	112185	32886	0	5	0	0	32	12	840267	0.2866	1
ATP5G2	1616455	189	50	37233	12420	0	2	0	0	50	31	1595430	0.286669	1
MMP11	637355	196	52	92691	28566	0	4	1	0	50	34	1556415	0.286684	1
KCNK9	62115	562	5	71064	20709	0	2	0	0	20	8	1022706	0.286692	1
CYLD	279624	792	2	188595	49140	0	4	0	0	41	15	1338417	0.28737	1
DTX4	542222	686	9	116991	36261	0	5	0	0	9	4	396819	0.287598	1
TTC30B	380902	434	27	126576	35424	0	2	0	0	27	6	970299	0.287614	1
RPTN	486922	468	25	155844	35559	0	5	1	0	50	25	1472229	0.287634	1
TMED1	2054203	208	30	43281	13095	0	4	0	0	50	24	1473309	0.287741	1
PML	375211	344	41	227367	71523	0	5	1	0	50	12	1659798	0.287743	1
GNPTG	1211641	215	40	61344	16578	0	4	0	0	46	32	1532709	0.287876	1
STOML1	337765	439	34	74790	24273	0	2	0	0	50	23	1588491	0.287887	1
TTLL2	254009	704	1	113427	31482	0	3	1	0	50	23	1900692	0.287985	1
HDHD2	119441	561	-11	50814	14310	0	1	0	0	50	17	1627884	0.288043	1
CYTH3	NaN	NaN	NaN	81540	19548	0	3	1	0	50	50	3026376	0.288056	1
TSPAN14	308181	588	-12	54108	14337	0	1	1	0	50	12	1146798	0.288136	1
MS4A3	336373	691	4	42012	12177	0	1	0	0	50	30	1625751	0.288156	1
UGT2A2	19584	1065	-8	102654	27513	0	1	0	0	50	9	1755675	0.288232	1
CD300C	698491	504	10	42687	12960	0	1	0	0	50	25	1502226	0.288461	1
NR1H3	1274054	198	38	87102	24678	0	4	0	0	50	22	1395738	0.288482	1
CPXCR1	1148	NaN	-19	58347	15363	0	1	0	0	50	15	1681425	0.288579	1
PPP1R10	2080582	271	32	179685	54810	0	7	2	0	50	29	1640682	0.288717	1
QKI	81134	1131	1	73224	20088	0	1	0	0	15	0	428409	0.288773	1
SPATA3	NaN	NaN	NaN	36612	11259	0	1	0	0	50	49	3018087	0.288781	1
GLIPR1	513848	606	-10	52488	14013	0	1	0	0	50	7	1384344	0.288942	1
GNAI1	94843	475	-34	71064	17469	0	2	0	0	50	19	1597023	0.289023	1
GEMIN8	121538	NaN	35	48141	11880	0	1	0	0	50	23	1572129	0.289087	1
BBX	224591	699	2	186354	47412	0	3	0	0	50	23	1773684	0.289121	1
STAM2	394536	218	24	105084	26946	0	2	0	0	50	11	1533735	0.289483	1
FHL5	116593	1376	3	58185	12690	0	1	0	0	50	8	1701324	0.289498	1
CRYBB2	174680	535	-35	41553	10287	0	1	0	0	50	26	1508139	0.289537	1
SGSM1	365627	308	-21	226368	60939	0	5	2	0	50	23	1717065	0.289573	1
PATE4	NaN	NaN	NaN	20196	4671	0	1	0	0	50	49	3011499	0.289642	1
KCNE3	633655	283	23	19629	5967	0	1	0	0	50	29	1778625	0.289691	1
SLC1A3	376343	436	11	105138	30942	0	3	0	0	50	20	1627506	0.289851	1
C19orf59	688482	384	31	38718	9072	0	1	0	0	50	25	1717794	0.289935	1
TNFSF14	745830	259	29	44982	14877	0	2	0	0	50	25	1742283	0.289938	1
PCDP1	309897	441	17	112131	27918	0	2	0	0	20	5	793341	0.290143	1
PTGS1	343200	635	27	116910	32130	0	2	0	0	50	12	1850472	0.290258	1
PHKA2	182760	NaN	35	243756	66960	0	5	1	0	50	19	1551150	0.290403	1
OR2A25	222080	812	-11	57672	17820	0	2	0	0	50	18	1521990	0.290408	1
TSGA10	504327	770	19	140832	34209	0	4	0	0	50	19	1564947	0.29046	1
GABRB2	11638	1049	7	100386	27189	0	1	0	0	50	13	1966788	0.290491	1
CADM1	29879	993	5	86022	24543	0	1	0	0	50	17	2163834	0.290559	1
DNAJC27	270621	296	35	54729	13959	0	1	0	0	50	13	1393659	0.290649	1
SLC16A2	357915	NaN	14	115533	35289	0	2	0	0	50	17	1767852	0.290682	1
MAPK3	NaN	NaN	NaN	76869	22680	0	2	1	0	50	50	3029508	0.290769	1
TESC	208178	290	16	43686	10827	0	1	0	0	50	19	1204092	0.290965	1
OSGEP	464497	395	17	65502	19386	0	2	1	0	50	29	1621944	0.291021	1
HBEGF	683517	143	39	40068	12339	0	2	0	0	50	28	1544751	0.291095	1
OR10H4	843515	575	12	59319	17631	0	1	1	0	13	4	639603	0.291177	1
ANGPTL2	NaN	NaN	NaN	94689	26649	0	3	0	0	50	49	3033477	0.291463	1
TOMM20L	290701	552	46	30915	7884	0	1	0	0	50	26	1410372	0.29178	1
HNRNPR	1032187	163	25	124686	33345	0	5	0	0	30	20	1070874	0.291783	1
ITGA3	1197823	210	20	213165	63369	0	4	0	0	36	9	1171665	0.291824	1
PIP5K1A	1409327	184	32	110916	30753	0	5	1	0	50	28	1642572	0.291959	1
B3GNTL1	303219	483	14	72333	19683	0	2	0	0	50	23	1503009	0.292022	1
SFT2D2	442995	299	18	32643	8910	0	1	0	0	50	14	1511541	0.292062	1
HOXB7	946208	524	29	41418	11961	0	2	0	0	50	30	1332153	0.292501	1
IL10	464449	357	29	35937	9018	0	1	0	0	27	8	1037529	0.292595	1
AASS	57655	988	-13	183384	49329	0	3	0	0	50	16	1852362	0.292758	1
CPNE1	1423559	169	53	119448	33723	0	3	0	0	50	18	1414017	0.292763	1
RUNX2	54989	416	8	100791	29781	0	2	2	0	50	12	1582335	0.292888	1
DHRS12	252271	384	33	65178	17118	0	1	1	0	50	12	1440018	0.292917	1
PEX11A	880974	190	35	47169	13905	0	1	0	0	50	28	1690254	0.293003	1
FOXM1	495532	443	28	152010	45792	0	5	0	0	14	7	592839	0.293074	1
TRIB2	49360	996	-2	65367	18873	0	2	0	0	50	12	1359477	0.293372	1
NTNG2	361444	509	37	101871	29106	0	3	1	0	50	20	1364742	0.293471	1
CD300LG	1025836	241	19	70767	21735	0	1	0	0	50	17	1648944	0.293503	1
ZBTB49	146158	506	40	149121	39285	0	4	1	0	50	24	1624077	0.29378	1
OR2L2	20939	1015	-27	58914	17469	0	2	0	0	50	30	1718145	0.2938	1
RCE1	1628594	187	29	62424	20196	0	2	0	0	50	26	1551528	0.29392	1
RAB15	521616	387	35	41796	11097	0	2	1	0	5	1	162729	0.29395	1
PLAT	580110	382	45	111699	29322	0	4	1	0	50	30	1616058	0.294106	1
ANAPC1	NaN	NaN	NaN	383697	104166	0	8	2	0	50	51	3110994	0.294293	1
ZCCHC16	65327	NaN	3	58860	16713	0	1	0	0	50	22	2296026	0.294333	1
PCIF1	725555	209	59	137349	38826	0	5	2	0	50	26	1468908	0.294442	1
DEK	467694	497	4	77436	17172	0	2	0	0	50	12	1455840	0.294449	1
ASTE1	313779	586	19	131733	34803	0	2	0	0	50	17	2113533	0.294683	1
C1orf159	2134483	234	21	39339	11610	0	1	0	0	50	33	1624536	0.294747	1
PRR5L	196876	169	-1	71442	20817	0	2	0	0	36	9	1084212	0.294896	1
C4orf19	124686	814	32	60588	16605	0	1	0	0	50	18	1738530	0.294926	1
INCA1	1407967	231	28	46602	12933	0	2	0	0	50	23	1648836	0.294943	1
COQ10B	681973	428	29	46224	13311	0	1	0	0	50	27	1464885	0.294975	1
OR51I2	99042	1030	1	58131	18252	0	1	0	0	15	0	331317	0.295152	1
CPA2	424934	212	30	83403	22221	0	3	0	0	42	23	1564272	0.295181	1
FAM195A	1115707	213	39	30942	9477	0	1	0	0	50	31	1287036	0.295667	1
GCLC	363341	337	24	127494	32400	0	2	1	0	50	21	1742553	0.295726	1
RAB3D	1385739	197	31	43038	11718	0	2	0	0	50	29	1686015	0.295731	1
EPC2	91724	642	7	159084	41634	0	5	0	0	13	3	489483	0.295796	1
MSL1	1573630	202	28	69714	18414	0	2	1	0	47	23	1465344	0.295987	1
POLR2H	1447013	268	44	30483	7668	0	1	0	0	50	61	2129139	0.296073	1
EPB41L3	57432	1036	-5	211545	59967	0	3	0	0	50	7	1329831	0.29608	1
ZNF645	91162	NaN	2	80973	22707	0	2	0	0	49	14	1707939	0.296083	1
MTBP	193807	877	-3	181062	45981	0	5	2	0	50	19	1391256	0.296185	1
FAM198B	123627	849	-14	104571	31266	0	2	0	0	50	18	2197530	0.296336	1
FBXO32	535498	203	19	71091	18009	0	1	0	0	50	14	1497177	0.296546	1
RAB25	2005405	213	39	41040	12258	0	2	0	0	50	30	1650969	0.296892	1
TSPAN8	233516	489	-31	47628	12474	0	1	0	0	50	28	1685151	0.297063	1
PLK3	574317	191	43	123444	38475	0	5	2	0	50	37	1548882	0.297112	1
CAPNS1	978272	326	6	54324	14526	0	3	0	0	29	14	700488	0.297421	1
LRP2BP	224125	422	25	69444	17388	0	1	0	0	50	13	1328994	0.297569	1
CDK5R1	636808	587	14	56781	18063	0	1	0	0	50	19	1530630	0.297647	1
TEX13A	9759	NaN	2	76869	23571	0	1	1	0	50	9	1438425	0.297684	1
XRCC5	597243	384	33	148068	36531	0	2	1	0	50	13	1692495	0.297719	1
PRKD3	482178	231	38	175905	46116	0	3	0	0	50	16	1392552	0.297749	1
AJAP1	5695	921	4	76437	25299	0	1	0	0	49	12	1776762	0.29805	1
PURG	339429	549	-11	73035	20358	0	2	0	0	50	24	1447794	0.298226	1
SAMD3	84835	891	27	105543	25596	0	2	0	0	50	18	1644597	0.298361	1
COX10	96214	985	-54	83781	26055	0	3	2	0	16	5	416907	0.298417	1
FAM76B	298879	467	2	69606	15930	0	1	0	0	50	16	1898370	0.298475	1
LMOD1	743998	168	27	114615	32076	0	8	0	0	50	33	1812780	0.298519	1
RASA2	405454	259	28	171585	42579	0	4	0	0	50	20	1940085	0.298594	1
ADCY7	304156	520	21	208305	62154	0	6	2	0	50	25	1726947	0.29885	1
TNNC1	1078407	229	62	33885	7263	0	1	0	0	50	32	1584765	0.299032	1
OR51Q1	99042	1030	1	59103	18495	0	1	0	0	15	0	331317	0.299248	1
RFC5	639801	584	-3	68391	18360	0	2	1	0	41	23	1558413	0.299401	1
MAP2K4	45834	583	-52	80001	20601	0	3	1	0	50	39	1635120	0.299727	1
GCNT3	521844	172	33	84375	22626	0	3	2	0	17	11	565245	0.300005	1
LDB2	55867	983	2	81162	20979	0	1	0	0	37	7	1117746	0.300239	1
OR10K2	135429	902	5	57672	18225	0	1	0	0	14	1	383940	0.300247	1
TLCD2	NaN	NaN	NaN	48465	16902	0	1	0	0	50	49	3023730	0.30026	1
EXOSC10	577167	408	34	177606	45792	0	5	0	0	50	16	1635039	0.300264	1
FAM120B	366503	600	-4	177066	47547	0	7	1	0	50	19	1237545	0.300267	1
PABPC4L	NaN	NaN	NaN	82377	22194	0	4	0	0	50	49	3029022	0.300493	1
GMPS	345838	388	4	136539	37125	0	4	0	0	23	5	687393	0.300531	1
KCTD11	1911735	206	36	41688	14931	0	2	0	0	50	35	1674000	0.300818	1
NETO1	32720	916	-26	108648	27270	0	2	0	0	50	25	1593108	0.301142	1
KCNJ13	325071	328	33	70011	18360	0	2	0	0	50	18	1449927	0.301215	1
SLC30A4	207518	299	10	83160	23274	0	2	0	0	50	18	1535787	0.301248	1
DNAJB11	592490	436	40	71253	18900	0	2	0	0	50	40	2226447	0.301553	1
CCM2	1090292	235	55	92907	26001	0	4	2	0	22	21	923535	0.30173	1
OR10G4	107524	830	-5	57321	18333	0	1	0	0	50	20	1490751	0.301859	1
GJB7	222729	596	22	43335	11421	0	1	0	0	50	24	1649484	0.301989	1
CDKL5	66108	NaN	25	202338	54513	0	6	1	0	50	24	1411749	0.302142	1
EIF5A	1911735	206	36	36828	9909	0	2	0	0	50	35	1674000	0.302193	1
CAPN1	3317462	168	54	141939	38529	0	5	2	0	39	25	1183788	0.302196	1
MANBAL	666037	571	64	16470	5076	0	1	0	0	50	22	1096848	0.302525	1
P2RX1	561462	215	32	79191	21573	0	3	0	0	46	29	1410615	0.302677	1
HIGD1B	1101543	172	28	19710	5562	0	1	0	0	50	22	1311714	0.302697	1
ASB15	86799	644	-7	114291	31752	0	2	0	0	50	14	1698165	0.30272	1
TMEM87A	595635	394	35	115479	29349	0	4	0	0	50	18	1588248	0.302722	1
CDC42SE1	1614665	165	40	16389	4023	0	1	0	0	50	32	1544913	0.302759	1
PDE7B	283639	392	6	91638	21843	0	3	0	0	50	24	1427544	0.302833	1
SIX2	74076	508	23	54297	16983	0	1	0	0	50	18	1726677	0.302965	1
ZC3H10	2878044	171	40	80055	25974	0	2	0	0	40	12	1218159	0.303099	1
RASSF3	450247	476	17	47466	11907	0	1	0	0	50	19	1578339	0.303343	1
SEC11A	341258	214	52	35667	9693	0	1	0	0	50	34	1472688	0.30358	1
TRAPPC2	135235	NaN	48	36261	8208	0	2	0	0	50	32	1512594	0.303652	1
RBM15	449729	379	28	179280	59184	0	5	0	0	37	14	1190835	0.303797	1
SPEF1	860065	241	43	46386	13149	0	1	0	0	50	30	1824363	0.303903	1
CCL17	749108	159	39	18711	5346	0	1	0	0	50	25	1393497	0.304037	1
AHR	370010	410	2	166239	43308	0	2	0	0	50	13	1587249	0.3044	1
OR52L1	432250	877	-13	60696	19818	0	1	0	0	50	12	1376163	0.304792	1
TMED6	1202748	125	20	47088	12609	0	2	0	0	50	19	1366038	0.304916	1
MFSD8	230666	331	9	101871	28134	0	3	0	0	50	17	1451520	0.305022	1
RRM2	805187	220	47	88722	23706	0	2	1	0	50	27	1756431	0.305074	1
GJB1	728738	NaN	25	52758	16578	0	2	0	0	50	40	2419011	0.305174	1
KRTAP19-1	14979	1035	-68	16821	5130	0	2	1	0	19	5	168777	0.305873	1
EYA2	306082	522	36	106299	29538	0	3	3	0	26	9	611820	0.306446	1
SEMG2	842540	324	25	114210	28269	0	6	0	0	50	28	1730187	0.306496	1
GOLGA5	360146	405	41	143964	37800	0	3	0	0	50	26	1835676	0.306677	1
RPS19	1360684	454	23	28890	8208	0	1	0	0	50	30	1418175	0.306836	1
ZNF684	693560	457	26	75816	17577	0	2	0	0	50	24	1587735	0.306935	1
PDHA2	16119	968	-25	73278	21411	0	2	0	0	47	32	1720575	0.306935	1
XRCC6	1475100	183	50	121689	30429	0	2	0	0	50	16	1436913	0.306973	1
KRTAP13-1	4608	1035	-69	32292	9909	0	1	0	0	50	21	1074573	0.307169	1
C20orf26	228680	750	-3	246672	65178	0	5	0	0	44	18	1457541	0.307247	1
ARSH	218545	NaN	-4	108702	30618	0	2	0	0	50	10	1425546	0.307341	1
EPX	851306	401	14	135675	42201	0	4	0	0	21	4	539487	0.307356	1
APEX2	245504	NaN	8	98631	29268	0	2	0	0	30	8	942300	0.307366	1
PWP1	122461	805	19	101331	25353	0	3	1	0	50	20	1536543	0.307692	1
TMPRSS11E	108503	748	7	83835	22275	0	1	0	0	50	15	1797390	0.30794	1
TUBD1	957047	216	26	90747	22167	0	3	0	0	50	45	1539000	0.308298	1
OR5J2	10101	1007	-38	58428	17469	0	1	0	0	50	17	1736694	0.308301	1
PRAF2	833689	NaN	41	32697	11610	0	1	0	0	50	40	1646919	0.308396	1
AP4B1	335231	545	13	142965	40257	0	4	0	0	41	19	1344573	0.308464	1
CDH2	43239	931	-16	175986	49275	0	4	0	0	50	24	1578177	0.308538	1
OR5L2	4183	1091	-36	57726	18090	0	1	0	0	50	24	1584144	0.308602	1
ESRRB	243524	616	39	97956	28323	0	3	1	0	50	17	1198395	0.308694	1
ARPP19	469724	386	15	22248	5859	0	1	0	0	50	23	1506033	0.308728	1
SPNS3	1297591	273	30	96768	31617	0	3	0	0	26	14	905040	0.308788	1
DEFB123	605825	450	-76	13878	3294	0	1	0	0	50	55	2139453	0.309067	1
SNX12	790100	NaN	37	31941	8964	0	1	0	0	50	37	1881333	0.309393	1
GTF2E2	489611	228	38	58239	14985	0	1	1	0	50	13	1290006	0.309704	1
PBK	406636	229	23	64746	16011	0	1	0	0	50	13	1535949	0.309802	1
SNX33	586224	231	34	110106	30105	0	4	0	0	50	27	1492965	0.309887	1
RNF114	589377	181	48	45495	11934	0	2	0	0	50	29	1435563	0.309903	1
ZNF141	427337	756	5	94284	22275	0	2	0	0	50	20	1880847	0.310006	1
SLC1A1	228047	813	19	101655	29484	0	2	1	0	50	20	1573587	0.310098	1
RPS3A	214920	335	26	53136	13203	0	1	0	0	50	13	1434645	0.310106	1
OR10J5	492825	646	-4	57699	17469	0	1	0	0	50	21	1626264	0.31019	1
WDTC1	854040	162	27	132840	36531	0	4	2	0	50	22	1451844	0.31025	1
C1QTNF9	270913	589	44	62991	19143	0	4	1	0	50	25	1237005	0.310378	1
OR5T3	10317	969	-43	64152	18630	0	1	0	0	50	12	1424952	0.310445	1
FPGS	1194942	179	58	112401	35181	0	3	0	0	50	26	1840590	0.310458	1
HIST2H3A	NaN	NaN	NaN	50058	17172	0	1	0	0	50	49	3024000	0.310518	1
HIST2H3C	NaN	NaN	NaN	50058	17172	0	1	0	0	50	49	3024000	0.310518	1
SRRM2	1717244	210	42	495207	178308	0	37	5	0	20	13	893646	0.310589	1
SLC35A2	834040	NaN	38	84780	25785	0	2	0	0	35	12	804060	0.31062	1
DNAJB6	318088	174	22	67365	17685	0	1	0	0	50	17	1985256	0.31069	1
WDR60	338838	241	3	212490	54567	0	5	1	0	50	18	1730079	0.310864	1
LRRC1	256818	437	30	102735	29052	0	2	0	0	50	28	1720278	0.311019	1
SYT17	766632	275	7	91584	26109	0	6	1	0	50	50	2079702	0.311323	1
CHD6	378513	502	-1	529524	142128	0	12	3	0	50	17	1623186	0.311337	1
TMEM198	548994	487	35	64962	24057	0	2	0	0	50	38	1889325	0.311634	1
CD59	755929	424	15	25596	6723	0	2	1	0	3	3	108459	0.311692	1
SBK1	1139917	221	55	77463	26784	0	3	0	0	50	38	2110401	0.311818	1
DIRC2	423454	412	37	90369	28620	0	2	1	0	50	33	1636551	0.311922	1
CRYBG3	123806	723	0	202743	51840	0	3	0	0	41	10	1188000	0.3123	1
ZNF746	588536	467	17	121041	37881	0	4	1	0	50	21	1509597	0.312318	1
RAB6A	549152	224	37	49518	12447	0	1	0	0	50	28	1672164	0.312357	1
RNF144B	322018	573	-11	59967	16173	0	1	1	0	50	15	1121688	0.312598	1
GYG2	197004	NaN	17	97767	27459	0	3	1	0	50	24	1787103	0.312808	1
KIAA1430	316425	530	37	103194	27621	0	3	1	0	50	15	1299078	0.312846	1
COX18	255276	747	14	62694	20088	0	2	0	0	50	24	1661310	0.312885	1
ATG16L1	427221	155	31	120717	32535	0	4	0	0	21	3	440451	0.31296	1
LRRC57	534369	269	40	46602	13338	0	1	0	0	50	23	1476873	0.313021	1
MYRIP	195545	917	9	167481	46683	0	5	1	0	50	23	1694196	0.313123	1
CDC27	955548	395	18	164592	43173	0	32	6	0	10	16	300861	0.313135	1
ASB2	200153	600	30	111699	33453	0	3	1	0	50	23	1476360	0.313212	1
CENPB	860065	241	43	111186	34614	0	3	0	0	50	30	1824363	0.313267	1
FAHD2A	255441	536	19	60885	17928	0	2	0	0	50	17	1421442	0.313354	1
FBXO4	113456	795	23	77814	20520	0	1	0	0	50	13	1462401	0.313395	1
BAK1	1252332	205	35	40905	12231	0	2	0	0	50	24	1281042	0.31345	1
C5orf20	625030	509	47	44955	14580	0	1	0	0	50	25	1830735	0.313493	1
MYB	150100	410	32	150147	39879	0	3	0	0	50	12	1638900	0.313556	1
KLF12	32882	755	41	77193	23004	0	2	0	0	50	21	1403217	0.31356	1
MPPED2	29166	1075	-21	61938	17037	0	1	0	0	50	20	1553418	0.313705	1
KCNA6	277089	903	16	97308	31482	0	3	1	0	50	23	1514916	0.314261	1
MDP1	974559	220	41	35748	9369	0	1	0	0	50	33	1863135	0.314362	1
TMEM136	290558	173	28	29349	7506	0	1	0	0	50	22	1865160	0.314458	1
PRDM11	145644	592	14	99522	27162	0	2	0	0	50	17	1514322	0.31466	1
AP2S1	1217560	186	44	28728	7317	0	2	0	0	50	43	1773954	0.314843	1
JAK1	269434	396	-5	230904	57537	0	4	1	0	50	12	1551663	0.315323	1
S100A4	1454773	186	26	20655	4779	0	1	0	0	50	25	1469583	0.315725	1
SLC16A4	403650	479	31	94986	26190	0	2	0	0	50	10	1450980	0.315727	1
ZMYM1	767910	390	22	224154	56511	0	4	0	0	50	30	2465478	0.315818	1
JPH3	594064	251	23	139887	43416	0	7	2	0	45	23	1231389	0.316204	1
METTL5	338901	489	35	45522	10773	0	1	0	0	50	15	1184814	0.316359	1
SPATA2L	1090549	219	38	76464	27378	0	3	0	0	36	20	902988	0.316405	1
METTL2A	330776	370	5	75681	19170	0	1	0	0	50	12	1452492	0.316504	1
EPM2A	76860	748	-3	65124	19116	0	1	0	0	50	16	1787049	0.316508	1
ATP1A1	616485	464	18	201150	55944	0	4	1	0	37	11	1139859	0.316564	1
MUC7	264556	861	26	67581	24921	0	1	0	0	50	21	1750275	0.316904	1
HNRNPCL1	NaN	NaN	NaN	56592	15174	0	1	0	0	50	49	3022002	0.316966	1
STX3	395993	494	8	62208	15552	0	2	0	0	50	20	1490670	0.316991	1
UBA3	264082	443	20	94068	24354	0	2	0	0	50	26	1749816	0.317224	1
SP8	109058	730	11	92097	32076	0	1	0	0	50	23	1996272	0.317398	1
TAAR8	178165	618	22	64503	18684	0	2	0	0	50	17	1486647	0.317431	1
LYZL4	342219	527	19	29376	7641	0	1	0	0	50	20	1689687	0.317753	1
KAAG1	390563	612	-3	23625	5292	0	1	0	0	50	23	1543698	0.317849	1
ZC3H4	1263858	179	37	246591	74817	0	7	1	0	50	19	1541727	0.318086	1
PHIP	209556	739	0	361179	94203	0	7	1	0	50	11	1571454	0.318101	1
GRIN2A	109137	922	-9	284067	75816	0	4	3	0	50	18	1842696	0.318296	1
ZNF629	1632278	158	61	164727	47331	0	6	1	0	47	23	1398546	0.31834	1
C3orf58	34520	1009	-6	82863	25110	0	2	1	0	50	12	1440099	0.318365	1
RNF146	113326	889	-6	67095	20385	0	1	1	0	50	22	1659339	0.318464	1
TOP2B	216871	636	-6	324540	80946	0	4	2	0	50	22	1965141	0.318497	1
UPP1	108417	409	26	60750	17091	0	1	0	0	50	18	1608390	0.318555	1
FAM107B	256093	327	36	60156	15741	0	1	0	0	50	14	1467612	0.318711	1
C22orf29	NaN	NaN	NaN	66906	21789	0	2	1	0	50	50	3028617	0.318722	1
SLC38A2	755445	311	14	100980	27081	0	3	0	0	50	35	1871559	0.318921	1
SNX32	3779084	287	42	79677	22383	0	4	1	0	50	38	1497285	0.318953	1
POGK	258555	773	-7	117747	32103	0	3	0	0	21	9	987282	0.318954	1
XPA	484322	358	36	54810	13392	0	1	0	0	50	27	1358937	0.319001	1
KIAA1211	460708	489	17	233442	69012	0	7	2	0	50	18	1652076	0.319149	1
MTPAP	91344	331	12	113400	31023	0	2	0	0	50	17	1611414	0.319263	1
CDK2	2080397	229	31	57429	17172	0	2	0	0	50	23	1539000	0.319528	1
CDV3	391516	327	36	51732	13959	0	1	0	0	50	21	1649511	0.319624	1
ASH2L	671169	258	34	125307	32724	0	3	0	0	50	25	1473660	0.319651	1
S100A16	1454773	186	26	20979	4941	0	1	0	0	50	25	1469583	0.319784	1
P4HA2	371617	246	35	110214	29754	0	3	3	0	40	11	953991	0.319931	1
ZNF160	395233	946	-48	160245	40068	0	5	2	0	50	18	1312551	0.320103	1
ACSBG1	421357	314	52	141156	39393	0	3	0	0	50	16	1528281	0.320119	1
SIRPB2	397239	386	42	65340	19305	0	1	0	0	50	18	1720818	0.320155	1
HMOX1	364892	241	2	55188	16497	0	1	1	0	12	3	488970	0.320451	1
DKKL1	2183690	309	30	46143	14364	0	2	0	0	50	41	1638441	0.320526	1
ADRBK2	149272	580	-13	140643	33264	0	2	0	0	50	10	1714743	0.320623	1
PTBP2	334207	676	-16	104409	29079	0	3	0	0	50	18	1181817	0.320733	1
RMND5A	431437	538	16	77949	19899	0	2	0	0	50	28	1574127	0.320733	1
SYT9	97813	941	-3	95229	26271	0	1	0	0	50	12	1589706	0.3209	1
ACER2	496889	421	24	54027	14661	0	1	0	0	50	20	1763667	0.32093	1
ZP3	870785	220	59	81621	24246	0	3	0	0	50	27	1446714	0.320977	1
INO80E	NaN	NaN	NaN	46926	14877	0	1	0	0	50	49	3021705	0.320999	1
MAGI1	74202	843	-10	298566	82863	0	4	1	0	50	19	2283795	0.321081	1
CPSF4	1327454	288	60	54621	13257	0	3	0	0	50	32	1306233	0.32113	1
HSF4	1101399	150	46	97632	27189	0	2	0	0	50	16	1405080	0.321167	1
TCERG1L	2679	871	-27	111969	34398	0	2	0	0	23	7	792126	0.321171	1
CPSF1	2043455	200	36	280881	82323	0	12	4	0	50	24	1283850	0.321221	1
SMC4	435184	513	16	258147	62532	0	7	2	0	50	24	1646136	0.321446	1
GPR157	890298	264	31	61047	21735	0	2	1	0	50	25	1405809	0.321561	1
CNOT4	579978	407	19	130599	36504	0	2	1	0	50	15	1669383	0.321581	1
TRAF4	1695792	208	40	90423	25974	0	4	0	0	50	37	1935387	0.321686	1
ZFX	615356	NaN	50	162729	40176	0	9	1	0	19	13	676323	0.321824	1
PEPD	302640	598	-23	97119	27459	0	3	0	0	50	30	1847529	0.32186	1
HERC6	434791	389	32	190431	49005	0	4	0	0	28	5	749304	0.322045	1
PHC2	668735	413	31	162702	50409	0	6	0	0	15	5	410265	0.322081	1
CCDC106	1077402	254	-10	54270	15633	0	2	1	0	50	18	1292436	0.322222	1
PKHD1L1	134643	732	6	829926	226314	0	12	4	0	44	12	1714419	0.32225	1
ACAD9	1117839	382	54	122040	34614	0	3	3	0	50	27	1549476	0.322271	1
RET	454068	563	-19	215325	64206	0	5	1	0	50	19	1562409	0.322469	1
UGT2A1	19584	1065	-8	102735	27351	0	1	0	0	50	9	1755675	0.322619	1
TMEM8B	847663	227	54	101250	32319	0	4	1	0	50	30	1566486	0.322772	1
CDK14	127937	1027	7	90099	23949	0	1	0	0	38	10	1473822	0.322856	1
CDADC1	329994	399	53	103059	25002	0	2	0	0	12	4	538461	0.32302	1
OR8H2	9992	1007	-32	58374	17523	0	1	0	0	50	23	1709073	0.323211	1
PACRG	81261	1273	-28	58212	15903	0	2	0	0	50	25	1833219	0.32323	1
TAS2R50	365490	676	-2	57078	16146	0	2	0	0	50	26	1353834	0.323247	1
RPS6	498767	339	12	48843	13851	0	1	0	0	50	32	1916325	0.323377	1
PARP8	76181	1215	14	171315	44874	0	4	0	0	50	19	1568862	0.323497	1
RSPO3	106114	826	-9	54675	12960	0	1	0	0	50	19	1356669	0.323674	1
TMEM119	437636	399	40	51651	17685	0	1	0	0	50	29	1852335	0.323808	1
LYG1	386109	630	24	38448	10557	0	1	0	0	50	16	1767069	0.323953	1
PSMA3	290719	552	26	52758	12852	0	1	1	0	50	25	1657746	0.323963	1
KCND3	320241	623	23	124605	37071	0	4	2	0	45	16	1423872	0.324128	1
NDUFA7	778783	209	14	22005	6831	0	1	0	0	50	29	1740231	0.324234	1
CRISPLD2	444452	243	21	99792	25758	0	1	0	0	50	10	1483137	0.324292	1
TBC1D22A	310166	538	-25	102519	27243	0	3	1	0	50	31	1943541	0.324465	1
ARG1	147816	864	7	62370	18549	0	1	0	0	50	14	1491264	0.324484	1
PTK2	466681	356	35	215973	55296	0	6	0	0	21	6	582606	0.32449	1
GALNT11	286605	586	15	119394	32157	0	4	1	0	41	27	1608552	0.324632	1
MCM10	246179	354	35	172692	46332	0	4	1	0	50	15	1433106	0.324667	1
ENGASE	592461	285	15	142047	43119	0	3	0	0	50	11	1531737	0.324761	1
ERP44	246986	681	19	82674	19791	0	2	0	0	50	18	1598805	0.324943	1
C5orf28	497364	369	1	41121	12015	0	1	0	0	50	22	1645218	0.324964	1
RRAGC	524940	458	24	78894	20412	0	2	0	0	50	28	1416987	0.324968	1
MRAP	436753	379	8	39906	11610	0	2	0	0	50	43	1843047	0.325173	1
EPS8	259826	496	11	163593	42876	0	3	0	0	50	23	1508706	0.325493	1
GLYATL3	NaN	NaN	NaN	55755	16092	0	1	0	0	50	49	3022920	0.325585	1
FAM49A	8240	1427	-4	65826	16146	0	1	0	0	50	8	1669626	0.325626	1
SHC1	1612870	224	35	111537	34182	0	3	1	0	50	16	1402218	0.325715	1
THRA	1573630	202	28	106461	25245	0	4	1	0	50	23	1622808	0.325848	1
ZNF682	468677	845	-59	98955	23436	0	4	1	0	50	19	1291518	0.325908	1
HS2ST1	332598	515	0	71145	17712	0	1	0	0	50	19	1647162	0.325952	1
ADAM2	12694	576	-2	149985	35505	0	3	2	0	44	13	1425195	0.326167	1
RND1	1655612	214	57	45252	12744	0	1	0	0	50	21	1512567	0.326315	1
RPA3	218130	434	16	24678	6102	0	1	0	0	50	23	1561383	0.326336	1
UFD1L	650407	300	16	62775	15633	0	2	0	0	50	17	1544184	0.326395	1
IRF7	1774224	236	57	98280	31887	0	2	0	0	50	15	1355130	0.326407	1
BSG	1647685	255	-8	77058	22248	0	3	0	0	50	24	1423332	0.326623	1
ECT2	301474	239	11	176580	45522	0	3	0	0	50	14	1587465	0.326639	1
HIST1H3A	408919	685	43	25137	8316	0	1	1	0	12	4	226476	0.326647	1
SEC23B	414545	392	23	150849	41931	0	2	0	0	42	12	1261251	0.326706	1
GRIA2	44831	925	-34	181197	48114	0	3	1	0	50	12	1514808	0.326757	1
GIGYF1	1884430	247	60	200475	58725	0	5	1	0	22	7	749385	0.326764	1
LTA	2517285	220	35	38475	12555	0	1	0	0	50	28	1655262	0.326853	1
MTX3	319253	795	31	61857	16956	0	1	0	0	50	7	1405242	0.326891	1
RIMS4	942798	168	40	51732	15498	0	1	0	0	50	22	1796958	0.326916	1
NKX3-1	378220	544	16	43929	13662	0	1	0	0	50	28	1888407	0.327087	1
ADH6	167884	786	-3	73710	20574	0	1	0	0	50	14	1632285	0.327094	1
FGF13	14292	NaN	-5	65016	16713	0	1	0	0	50	11	1442151	0.327145	1
SNPH	441449	468	32	92853	28728	0	2	0	0	25	4	542241	0.32717	1
TFF2	313101	464	90	25920	6642	0	1	0	0	50	33	1291788	0.327356	1
TFB2M	389456	409	4	77733	21006	0	1	0	0	50	15	1566783	0.3275	1
NDUFA4L2	2162032	238	58	17685	4671	0	1	0	0	50	39	1826847	0.327563	1
PIKFYVE	256462	539	10	415611	108459	0	9	2	0	50	18	1706292	0.327654	1
BCAM	920101	196	-3	119880	37827	0	3	0	0	50	25	1342683	0.327755	1
ZNF174	1361831	303	29	83754	22842	0	1	0	0	50	21	1633608	0.32789	1
FGGY	60575	728	4	113859	31293	0	2	0	0	16	2	471906	0.327896	1
ARHGAP11B	220858	693	10	52731	14337	0	2	0	0	50	23	1521990	0.327897	1
TBC1D15	219208	563	-9	148365	35667	0	3	0	0	50	19	1706994	0.327919	1
REXO2	98814	612	-12	47898	11880	0	1	0	0	50	14	1927476	0.32795	1
MRPS10	524386	273	43	40743	10449	0	1	0	0	50	27	1688823	0.328208	1
TMEM176B	734961	689	14	52056	15984	0	1	1	0	50	19	1479681	0.328306	1
CDK13	221361	636	14	285957	85914	0	6	1	0	11	12	970758	0.328699	1
APOL6	936853	205	-13	65070	19170	0	2	0	0	50	24	1357155	0.328702	1
SLC25A38	160739	595	32	58320	17739	0	1	0	0	50	18	1693575	0.328738	1
STK40	636943	212	28	84996	24192	0	3	1	0	45	24	1199448	0.328937	1
HAVCR2	166999	1198	18	58617	16713	0	1	0	0	50	15	1460295	0.32895	1
METTL3	707390	470	30	112725	32022	0	3	1	0	48	23	1772901	0.328962	1
WDR82	1114111	181	50	62991	15903	0	2	0	0	50	36	1521207	0.32908	1
HIST1H4G	390169	544	57	18252	5967	0	1	0	0	50	21	1051380	0.329119	1
EFCAB2	675692	505	10	35883	8505	0	1	0	0	50	29	1580607	0.329207	1
TRAPPC1	1794630	337	33	28539	8073	0	1	0	0	50	35	1491534	0.329222	1
ZNF800	313691	807	-5	129114	34182	0	2	0	0	49	14	1804113	0.329223	1
PPP1R1B	1164935	239	28	40959	10800	0	1	0	0	50	12	1434699	0.329329	1
TAF5L	299238	340	15	112833	32157	0	3	1	0	50	28	1749951	0.329353	1
RABGAP1L	235125	938	7	170937	43065	0	2	0	0	50	16	1694088	0.329416	1
RAB33A	339869	NaN	58	45441	12717	0	3	1	0	16	10	456327	0.329476	1
PAFAH1B1	612041	184	14	81783	21006	0	2	0	0	50	22	1485540	0.329525	1
KCNK6	1467279	253	0	56268	20682	0	3	1	0	50	31	1515915	0.329533	1
HEATR5B	614688	281	16	396954	117882	0	8	2	0	50	12	1460997	0.329565	1
DCDC1	84163	938	-25	69849	18684	0	4	2	0	8	3	223155	0.329626	1
PUS7	403383	192	37	132354	33372	0	3	1	0	50	30	1563867	0.329649	1
UCP3	523442	225	51	60129	18036	0	2	0	0	50	26	1626750	0.329921	1
RRAS	1733181	195	36	42066	12933	0	2	1	0	50	29	1722627	0.330025	1
PABPC5	8224	NaN	-28	72279	20790	0	2	0	0	31	19	1087128	0.330062	1
VAV2	674833	504	29	178632	44523	0	5	3	0	34	19	1040202	0.330072	1
ZNF641	809696	412	16	91800	24840	0	2	0	0	50	19	1503144	0.330174	1
SLC17A8	188107	693	-3	115965	30969	0	2	0	0	50	10	1474659	0.330343	1
HLA-DRA	1070559	595	14	49383	14040	0	1	0	0	50	12	1723113	0.330363	1
ZFP1	647304	162	19	81000	19116	0	2	1	0	50	35	1727676	0.330397	1
PGBD1	273319	502	35	158247	40851	0	4	0	0	46	17	1217862	0.330523	1
OR10C1	404210	854	21	56241	19737	0	1	1	0	50	7	1260225	0.330565	1
BTC	110870	606	3	35370	9666	0	1	0	0	50	17	1673514	0.330629	1
BTBD1	384974	679	27	93744	25893	0	1	0	0	30	10	1365417	0.330709	1
ODF3L1	569836	231	44	52677	15120	0	2	0	0	50	28	1517454	0.330817	1
TM4SF20	248187	164	18	44631	12393	0	1	0	0	50	21	1468314	0.330981	1
NT5C1B	39949	1075	-7	117801	33588	0	1	0	0	50	7	1458054	0.331083	1
COPS6	1503181	254	41	65448	17334	0	4	1	0	50	68	2064717	0.331194	1
PHKG1	738325	642	4	76356	21006	0	5	0	0	50	42	1840104	0.331381	1
FAR2	104924	674	-4	102276	26676	0	2	0	0	50	12	1705887	0.331486	1
FAM173B	623675	325	5	45252	13068	0	2	0	0	50	40	2124333	0.331548	1
GPR142	362227	433	-8	85401	28080	0	2	0	0	50	33	1926126	0.331615	1
ALKBH3	437017	676	6	57726	14931	0	1	0	0	50	17	1233576	0.331683	1
ITK	266925	1180	30	124362	31887	0	2	0	0	50	20	1646892	0.331774	1
PMS1	424679	385	20	184788	45819	0	3	0	0	50	18	1566081	0.331869	1
AIFM2	484729	425	25	71739	21735	0	1	1	0	50	18	1658448	0.331933	1
NKIRAS1	399346	319	6	37989	9882	0	1	0	0	50	16	1694466	0.331947	1
KRT20	1036346	358	5	82971	22734	0	3	0	0	21	5	480249	0.332205	1
MSL2	206721	398	16	109215	31563	0	2	2	0	50	22	1354833	0.332254	1
C17orf66	620019	235	8	113481	29808	0	2	0	0	33	14	1269081	0.332392	1
TSPYL2	884583	NaN	77	136188	34398	0	4	1	0	50	27	1716957	0.332393	1
DNMT3B	675780	173	42	170883	46683	0	10	2	0	50	26	1791396	0.332477	1
TMEM106C	374433	246	47	49383	13878	0	1	0	0	50	22	1351107	0.332845	1
NPFF	1469374	191	55	22059	6453	0	1	0	0	50	24	1415529	0.333067	1
ARHGEF7	405184	579	30	176850	48006	0	6	0	0	25	8	845370	0.333085	1
SRMS	1262904	298	54	92745	28674	0	2	1	0	50	21	1426437	0.333156	1
CYHR1	2043455	200	36	88614	27702	0	4	1	0	50	24	1283850	0.333393	1
RARRES3	854193	303	56	32292	8937	0	1	0	0	50	22	1253421	0.333492	1
MSX1	132550	558	37	54945	19251	0	1	1	0	50	18	1568349	0.333811	1
IL23A	2869106	184	52	36207	10935	0	1	0	0	50	46	1921644	0.333897	1
DCLK1	82515	1033	-14	142398	40500	0	3	0	0	27	6	892134	0.333903	1
TAS2R4	200522	844	14	55782	17118	0	1	0	0	50	19	1341468	0.333972	1
LEPROTL1	387693	231	51	39960	11961	0	1	0	0	50	34	1450791	0.334154	1
LRRC59	1335838	196	24	59265	17523	0	2	0	0	50	24	1741338	0.334346	1
RASEF	119712	813	-45	146232	39015	0	2	0	0	48	14	1714230	0.334663	1
ZPLD1	68082	621	-10	85131	23247	0	2	0	0	50	17	1859922	0.334824	1
OR5H15	200002	811	-15	59076	17064	0	1	0	0	50	17	1599399	0.33516	1
TSHR	214327	492	-10	156681	43065	0	6	2	0	50	34	1571157	0.335387	1
GABBR2	398895	584	32	182520	52218	0	3	0	0	16	0	444096	0.33554	1
TRIM35	353563	561	8	94338	27486	0	2	1	0	50	32	1703673	0.335551	1
GPR4	1029266	194	44	66906	21303	0	1	0	0	50	24	1958607	0.335588	1
UPF2	353958	125	28	254691	61452	0	7	1	0	50	17	1714365	0.336291	1
ERBB4	20702	1173	-5	259065	67932	0	2	0	0	49	6	1483947	0.336365	1
CWF19L2	147499	853	-10	181170	41985	0	3	0	0	50	20	2134242	0.33652	1
MRPL50	112947	898	-22	30537	8586	0	1	0	0	50	20	1636524	0.3366	1
DOLPP1	1428394	206	30	46872	13635	0	1	0	0	50	22	1575072	0.336738	1
ARHGAP26	156598	456	38	163755	41580	0	3	1	0	50	22	1797714	0.336766	1
FITM1	974559	220	41	53163	18684	0	2	0	0	50	33	1863135	0.337088	1
NAAA	483325	429	44	70524	20763	0	1	0	0	50	21	1829925	0.337147	1
KRT32	1445853	325	-22	86346	24867	0	5	0	0	28	15	722601	0.337245	1
IRGC	452493	192	-2	84537	28701	0	2	0	0	50	23	1564812	0.337346	1
KSR2	639801	685	-6	179685	50679	0	3	0	0	50	11	1702242	0.337408	1
ARGFX	289448	613	18	61128	16956	0	1	0	0	50	20	1886328	0.337467	1
RSPH9	1626879	278	43	53622	15309	0	3	0	0	50	63	1860570	0.337681	1
TSGA13	278944	433	9	55188	13824	0	1	0	0	50	19	1520937	0.337754	1
PSMB8	1253457	401	26	61587	18603	0	2	0	0	50	26	1446093	0.337778	1
SLC14A2	374175	438	-8	177849	52110	0	5	3	0	50	32	1929663	0.337786	1
SKIL	368934	202	23	133650	34425	0	2	1	0	50	14	1694817	0.337856	1
CHST11	1030269	419	34	67986	18441	0	2	1	0	50	22	1134648	0.337971	1
ATP6V0E2	438832	686	26	44685	16065	0	1	0	0	50	14	1732239	0.338037	1
RER1	561270	302	24	39420	10395	0	2	0	0	50	31	1438128	0.338165	1
TAGLN2	803074	403	7	39339	10557	0	1	0	0	41	16	1001916	0.338231	1
COMMD7	661510	132	45	41472	9963	0	1	0	0	50	23	1441341	0.338328	1
NUDT18	584373	219	34	59697	19845	0	3	1	0	50	32	1617732	0.338344	1
CHRDL1	108458	NaN	14	92448	22653	0	2	1	0	50	23	1774656	0.338406	1
SERINC1	140855	973	-19	89505	23895	0	2	0	0	50	26	1741635	0.338519	1
RUVBL2	1998663	190	39	91233	26379	0	4	1	0	50	29	1717281	0.338681	1
EXOSC4	2720766	211	27	44982	15606	0	2	1	0	25	13	781110	0.338792	1
RPL15	399346	319	6	38988	11799	0	1	0	0	50	16	1694466	0.338993	1
TMEM82	683349	174	22	62154	23058	0	2	0	0	50	43	1763667	0.33914	1
STAU1	877789	147	49	113697	32103	0	2	0	0	50	31	1810809	0.339299	1
HIST1H4F	390169	544	57	18954	6480	0	1	0	0	50	21	1051380	0.339337	1
FBXO5	164387	538	-5	86805	23355	0	2	0	0	50	14	1746306	0.339461	1
SLC17A5	713348	132	31	96228	27540	0	3	1	0	50	35	1593837	0.339631	1
TMEM30A	394127	423	-3	70713	19197	0	1	0	0	50	16	1583820	0.339982	1
LRWD1	642828	230	65	124038	38124	0	4	0	0	6	0	167130	0.340095	1
CSTF3	588753	326	16	150741	37422	0	3	0	0	50	19	1598211	0.340101	1
OR2L13	24438	1015	-27	59103	17280	0	1	0	0	50	30	1718145	0.340452	1
ZNF189	112947	898	-22	123930	29079	0	2	0	0	50	20	1636524	0.34047	1
KIFAP3	181109	743	2	160461	38394	0	2	0	0	32	3	1047060	0.340618	1
FCF1	886320	184	43	41310	9639	0	1	0	0	50	30	1450710	0.341102	1
UBE2J2	2050211	196	28	54378	14796	0	2	0	0	50	31	1624698	0.34112	1
CTRL	879834	158	50	50895	15606	0	2	1	0	29	18	995814	0.34114	1
CMBL	625000	192	9	49248	12150	0	1	0	0	50	22	1628802	0.341534	1
SIGLEC1	942842	353	32	315981	106029	0	7	3	0	39	30	1399383	0.341651	1
FGL2	312362	639	30	85509	21897	0	2	0	0	50	18	1670544	0.341688	1
FOXD2	190214	478	16	87507	33021	0	2	0	0	23	9	638442	0.341706	1
ABLIM3	339889	423	17	138510	35154	0	3	0	0	22	8	768528	0.341824	1
CASP14	990597	524	16	47844	12987	0	1	1	0	15	2	331614	0.342031	1
FKBP10	1760409	175	35	111294	33291	0	3	1	0	50	27	1590003	0.342134	1
PMM2	401569	247	-2	50193	12258	0	1	0	0	50	26	1919511	0.342247	1
KYNU	48515	369	20	95148	24570	0	1	0	0	50	8	1568430	0.342545	1
ADAT1	449343	354	18	98496	26649	0	2	0	0	50	23	1617759	0.342591	1
TPCN1	429315	206	36	176634	48465	0	5	1	0	50	22	1589409	0.342648	1
IGSF11	197243	714	3	85482	25893	0	1	0	0	50	17	1823904	0.342758	1
REL	635308	439	34	121878	32022	0	3	1	0	50	25	1750491	0.342916	1
GTF2F1	943949	407	31	103707	26055	0	4	1	0	50	23	1371519	0.342973	1
PANX1	367552	774	-16	82080	22977	0	2	1	0	50	16	1228635	0.343125	1
CA4	973133	347	10	61371	17118	0	2	0	0	18	4	403677	0.343132	1
OSBPL5	513529	333	53	171072	49572	0	3	0	0	36	8	1073493	0.343441	1
HEMK1	583785	302	50	66258	19197	0	1	0	0	50	17	1328022	0.343571	1
DAXX	1456953	262	30	143964	43227	0	3	2	0	50	15	1588545	0.34361	1
FAM126A	1063802	413	26	102357	27729	0	2	0	0	50	28	1972458	0.343702	1
HLA-DPA1	1479000	431	28	50463	14418	0	2	1	0	50	27	1357803	0.343882	1
KLHL13	57664	NaN	-2	143775	37908	0	1	0	0	50	5	1539108	0.343987	1
TUBGCP4	823006	415	50	131328	36261	0	4	1	0	28	23	1156788	0.344032	1
ZNF451	372718	348	26	211977	50625	0	4	0	0	34	14	1318734	0.344111	1
ZNF92	300914	894	18	116532	27081	0	2	0	0	50	21	1639656	0.34416	1
BCL2A1	234803	702	28	38232	9720	0	1	0	0	50	30	1651428	0.344334	1
PPP2R2C	480192	540	50	93528	23922	0	2	1	0	50	19	1359288	0.344428	1
ZP4	14616	1051	-30	105003	30186	0	2	0	0	26	10	1003914	0.344499	1
PON3	135737	327	-2	70227	18954	0	1	0	0	50	22	1747953	0.344556	1
NADK	1511678	243	30	87669	24516	0	3	0	0	50	22	1412478	0.344615	1
C2CD4D	NaN	NaN	NaN	61425	24759	0	1	0	0	50	49	3031587	0.344637	1
KLK5	581408	606	29	57186	16200	0	2	1	0	39	28	1134162	0.344805	1
BCO2	389593	362	2	114102	30402	0	1	0	0	50	8	1355130	0.345076	1
SETDB2	413604	343	39	143586	35586	0	3	0	0	50	22	1599183	0.34513	1
ZNF574	886688	438	31	163674	54621	0	6	1	0	50	29	1716066	0.345168	1
IL32	1626425	234	44	38745	9612	0	2	1	0	23	25	618219	0.345245	1
TAX1BP3	504736	354	20	24246	7101	0	1	0	0	50	29	1774359	0.345253	1
NCOA5	595034	381	53	110835	32373	0	3	0	0	50	29	1942434	0.345322	1
RNASE2	1005555	429	4	31104	8586	0	1	0	0	50	26	1344897	0.345326	1
CELF2	96767	864	5	107757	28890	0	2	0	0	17	2	535572	0.345615	1
POLR2F	1370748	203	50	25731	6669	0	1	0	0	50	21	1394118	0.345819	1
RNF144A	40925	1103	7	58212	15255	0	1	0	0	36	7	1232982	0.345931	1
ADPRHL1	808201	223	49	69579	18792	0	2	0	0	50	30	1507923	0.346054	1
HSP90AB1	1037256	312	54	143262	36315	0	6	3	0	44	29	1257795	0.346182	1
BBS2	543900	285	20	140940	39690	0	2	0	0	50	21	1596699	0.346277	1
STRN3	431319	370	14	157113	42309	0	2	2	0	50	22	1740312	0.346754	1
SDF4	2356409	196	27	78570	20655	0	5	0	0	25	36	1152900	0.34676	1
OR8K3	10317	969	-43	58563	17334	0	1	1	0	15	3	448119	0.346984	1
SNAP47	595623	459	1	93825	28728	0	2	0	0	50	17	1283094	0.347011	1
ACTR1A	871726	178	41	73980	20871	0	2	1	0	50	38	1637172	0.347233	1
HSPB9	2171374	206	37	29484	9558	0	2	1	0	50	41	1352457	0.347374	1
HARS2	774470	356	31	99225	27864	0	3	0	0	50	29	1576476	0.347477	1
LRMP	250089	700	17	101358	25650	0	2	0	0	50	17	1493019	0.347756	1
GEM	518471	543	24	57726	15741	0	1	0	0	50	13	1201662	0.347788	1
MS4A6A	336539	784	-2	51651	12825	0	1	0	0	50	19	1678023	0.347816	1
VAPA	405142	172	42	58185	15444	0	2	0	0	50	28	1259604	0.347965	1
TPPP	683895	411	28	41904	12528	0	1	0	0	50	25	1518345	0.348083	1
OR4D10	430021	507	-1	57483	18333	0	1	0	0	50	10	1610982	0.348126	1
METTL11B	NaN	NaN	NaN	55971	14337	0	1	0	0	50	49	3021165	0.348525	1
GPR34	531498	NaN	45	73089	20385	0	2	0	0	50	25	1894860	0.348596	1
RPS3	587975	205	39	46953	14445	0	1	0	0	50	26	1553310	0.348739	1
ALDH3A1	550749	220	-13	88911	24651	0	3	1	0	50	29	1606095	0.348807	1
FAM149A	373525	536	-13	93285	27648	0	2	0	0	50	22	1616760	0.348903	1
SLC29A3	619612	487	40	89262	28755	0	4	2	0	7	3	283716	0.349061	1
ZBTB48	628180	259	38	133542	37287	0	4	1	0	50	24	1709856	0.349109	1
GPR17	NaN	NaN	NaN	67851	22140	0	3	2	0	22	16	748332	0.349255	1
ZNF546	1181917	521	22	164835	40176	0	5	1	0	50	32	1738260	0.349332	1
ZNF521	24828	599	-1	256257	64746	0	3	1	0	50	16	1927503	0.349427	1
ARSD	191640	NaN	18	123687	35964	0	4	1	0	50	17	1571859	0.349498	1
FGFRL1	689217	247	58	94014	30807	0	4	1	0	50	36	1547559	0.349595	1
MOCS2	204924	419	-5	51786	11394	0	1	0	0	50	22	1474929	0.3497	1
WDR35	482678	390	24	236169	59805	0	5	0	0	22	6	739800	0.349741	1
CEACAM18	393294	583	17	76464	21789	0	1	0	0	50	15	1776654	0.34981	1
DPY19L1	112453	935	0	135729	35343	0	1	0	0	50	8	1731321	0.349875	1
TSPAN12	106040	717	3	60885	15741	0	1	1	0	50	15	1605123	0.349945	1
H1FNT	809696	412	16	46629	15579	0	1	0	0	50	19	1503144	0.3501	1
OR52K1	190769	879	-1	58347	18522	0	1	0	0	50	17	1502982	0.350208	1
RIPK4	302894	182	30	146529	46656	0	6	2	0	37	16	1065285	0.350265	1
LRRC14B	836250	543	14	92799	32832	0	2	1	0	50	12	1461834	0.350428	1
GRHL3	893155	198	22	121986	32319	0	3	0	0	50	15	1230147	0.350542	1
VPS45	1181361	309	32	112914	30375	0	2	0	0	15	3	513405	0.350594	1
SLC31A2	448462	456	9	27783	8181	0	1	0	0	50	21	1479654	0.35061	1
C2orf44	243145	226	33	136431	39987	0	3	0	0	50	16	1371141	0.350645	1
LRIT2	216191	860	-17	102681	32022	0	1	0	0	50	16	1918485	0.350664	1
OR6C75	667726	802	-14	58563	17415	0	1	0	0	50	31	1475037	0.350696	1
NCDN	1049488	388	34	134190	45468	0	3	1	0	50	18	1075572	0.351127	1
CYP2F1	1016551	354	11	94473	27999	0	3	0	0	14	2	340308	0.351239	1
SAT1	491139	NaN	46	35343	8073	0	1	0	0	50	19	1714608	0.351253	1
TMEM129	867402	350	39	67824	21357	0	3	0	0	50	40	1605663	0.351282	1
ACTL6B	1884430	247	60	84753	23220	0	1	0	0	50	18	1742715	0.351527	1
TXNL4A	399915	506	36	28647	6750	0	1	0	0	50	19	1387503	0.35171	1
OR5K2	390532	796	2	59589	17361	0	2	0	0	50	21	1480194	0.352077	1
PHF14	139683	990	-2	177687	43605	0	4	2	0	50	17	1485864	0.352194	1
OR10J1	347588	699	-5	59913	18414	0	1	1	0	50	20	1343898	0.352434	1
CSDE1	600480	472	3	166779	44712	0	3	0	0	34	6	919458	0.352517	1
GPD2	116871	496	10	142992	39096	0	3	1	0	50	16	1771875	0.352549	1
IRF2BP1	883734	203	39	104922	37233	0	4	1	0	23	12	776088	0.352703	1
TMEM207	163494	373	9	28620	8559	0	1	0	0	50	22	1578339	0.35277	1
TMEM147	1081638	390	41	44658	12285	0	2	0	0	50	27	1379214	0.352973	1
RAB40B	855855	243	21	53109	16308	0	1	1	0	50	17	1355076	0.353149	1
HYLS1	NaN	NaN	NaN	56754	16470	0	2	0	0	50	49	3023298	0.353199	1
TRDMT1	558326	451	5	78246	20412	0	1	0	0	50	13	1498797	0.353396	1
TFRC	959125	170	52	150498	40257	0	5	2	0	50	33	1589220	0.353433	1
SCML4	294918	581	36	79272	23841	0	2	1	0	50	18	1467126	0.353476	1
ZNF2	223452	616	24	83025	22032	0	2	1	0	50	16	1631799	0.35365	1
BCL10	348743	384	3	44496	13014	0	1	0	0	50	13	1528335	0.353693	1
AKTIP	247554	403	8	58482	15633	0	1	0	0	50	18	1563435	0.353697	1
CCDC90B	308108	414	18	51813	12744	0	1	0	0	50	32	1860165	0.353716	1
RANBP3	1166723	392	36	112158	31050	0	3	1	0	50	26	1362528	0.353765	1
ALG5	176745	650	16	64557	17496	0	1	0	0	50	19	1463319	0.354119	1
PI4K2A	514755	143	54	92556	26838	0	2	0	0	45	31	1377648	0.354153	1
CRIP2	689089	298	41	42066	11151	0	1	0	0	50	27	1600722	0.354201	1
SEMA3G	1078407	229	62	148338	46791	0	7	0	0	27	16	686556	0.354299	1
CYP27C1	354277	226	19	72090	20817	0	1	0	0	50	15	1650483	0.354355	1
FERMT3	1602391	278	57	129600	37260	0	5	0	0	50	25	1582389	0.35445	1
ARHGAP25	385975	470	20	129735	33804	0	2	1	0	50	25	2166912	0.354451	1
SDC1	532338	320	37	58050	18819	0	2	1	0	50	28	1567701	0.354462	1
CCNG2	421623	562	33	68391	17550	0	1	0	0	39	15	1198692	0.354598	1
ANO4	245388	937	-16	185868	46035	0	2	0	0	44	6	1126899	0.35473	1
ERRFI1	387339	207	26	87426	26055	0	2	0	0	50	18	1889433	0.354791	1
NEDD9	228484	418	30	164700	46791	0	4	1	0	50	20	1983609	0.354863	1
PANK3	413558	432	32	72090	20007	0	2	0	0	50	17	1484406	0.35495	1
OR5M8	NaN	NaN	NaN	58860	16956	0	1	0	0	50	49	3023784	0.355383	1
IL20	467839	385	39	35073	9396	0	1	0	0	50	31	1718442	0.355575	1
RAD50	715524	320	48	264789	62046	0	7	0	0	50	20	1408779	0.355575	1
SPESP1	373553	452	33	67230	18387	0	1	0	0	50	16	1434186	0.355748	1
OMP	437413	450	40	30510	9261	0	1	0	0	50	21	1593783	0.356056	1
STMN2	147465	518	-12	36153	9045	0	1	0	0	50	22	1970676	0.356059	1
GABRR1	398929	446	29	95067	24489	0	1	0	0	50	15	1920915	0.356114	1
PRLHR	613868	617	8	66285	24192	0	1	0	0	50	19	1493910	0.356117	1
DNAJC16	636573	188	34	153954	40851	0	4	0	0	11	8	493290	0.356166	1
JAZF1	292385	474	14	47628	12960	0	1	0	0	50	20	1382535	0.356198	1
MRS2	399209	465	7	86832	24300	0	2	1	0	50	17	1435968	0.356502	1
TSSK2	487560	277	18	67689	19548	0	2	0	0	50	16	1517022	0.357296	1
CPNE5	844979	244	43	119097	31887	0	3	0	0	50	29	1754163	0.357367	1
SDHAF2	1404745	245	58	33237	8478	0	1	0	0	50	26	1210329	0.357411	1
EVI2B	NaN	NaN	NaN	84105	25326	0	2	0	0	50	49	3032154	0.357414	1
ZNF367	355218	400	23	66555	20034	0	1	0	0	50	17	1674513	0.357509	1
TULP3	494496	336	35	100008	27162	0	3	0	0	50	32	1607283	0.357751	1
OR8G5	154391	921	-14	65259	18981	0	2	1	0	8	2	239490	0.357941	1
IGFBP4	1202660	149	21	48978	14931	0	1	0	0	50	20	1413180	0.358086	1
EXOSC7	479578	326	41	57456	16092	0	1	0	0	50	18	1513134	0.358375	1
FPR1	436280	690	-24	64827	20790	0	1	0	0	50	16	1256661	0.358443	1
MAP3K2	435982	175	26	123795	31887	0	3	0	0	9	2	370305	0.358454	1
TAAR6	178165	618	22	64989	18927	0	2	1	0	15	4	459135	0.35848	1
TIPIN	505508	307	46	60561	15093	0	1	0	0	50	24	1658961	0.358536	1
PCDHGB7	662513	568	2	173502	54270	0	5	2	0	50	36	1892592	0.358542	1
KIFC1	1441897	236	31	126576	40446	0	3	1	0	50	23	1506438	0.358547	1
LACE1	346225	491	37	96093	24921	0	2	0	0	50	20	1410372	0.358643	1
EIF6	1290513	170	45	56268	14769	0	1	0	0	50	22	1760373	0.35871	1
SRPK1	761613	404	28	131625	32643	0	3	1	0	50	24	1968624	0.358739	1
SYF2	613835	460	36	49464	11934	0	1	0	0	50	30	1804734	0.358782	1
IGF2BP1	820571	174	28	113778	31212	0	4	0	0	50	27	1446849	0.358832	1
MAPRE2	261776	582	11	71415	17685	0	1	0	0	50	21	1483353	0.358918	1
ANXA11	366637	626	7	98388	29106	0	3	1	0	50	23	1514241	0.359173	1
DIRAS3	331080	524	-25	43416	12798	0	1	0	0	50	28	1915758	0.359177	1
ST6GALNAC3	259709	989	-11	60858	15768	0	1	1	0	50	16	1641411	0.359308	1
CDC25B	860065	241	43	113859	32184	0	2	1	0	50	30	1824363	0.359465	1
RRAS2	428878	363	-3	41364	10476	0	1	0	0	50	13	1391418	0.359611	1
DEPDC5	557139	336	19	318708	83943	0	6	5	0	50	27	1675053	0.359613	1
DHX37	1085697	229	46	223533	66447	0	7	2	0	50	30	1572075	0.359731	1
KAL1	16107	NaN	-30	131841	37854	0	3	0	0	16	4	612684	0.359789	1
CLDN10	228898	397	50	57726	16875	0	1	1	0	26	11	780354	0.359894	1
C2CD2L	1390854	195	58	132759	43497	0	4	2	0	50	26	1304127	0.359958	1
FABP1	180956	612	6	26136	6264	0	1	0	0	50	21	1346436	0.360013	1
POLR2D	588745	248	39	28755	7128	0	1	0	0	50	24	1674216	0.360087	1
OPRM1	44509	878	0	139455	38583	0	2	0	0	50	16	1656531	0.360098	1
PRL	13319	831	-2	44334	12690	0	1	0	0	50	15	1687095	0.360149	1
CABP4	1392213	215	53	52623	16227	0	1	1	0	50	19	1172178	0.360233	1
SLC22A2	653647	326	-9	107244	31104	0	2	1	0	50	19	1415772	0.360419	1
2021-09-08	717720	356	59	104571	25515	0	3	0	0	40	19	1110132	0.360479	1
ZNF648	126238	679	-1	106569	32022	0	2	0	0	50	14	1678806	0.360603	1
GOPC	189169	465	9	90045	25056	0	2	0	0	50	27	1719549	0.360757	1
SIGLEC15	384767	380	42	61182	20385	0	1	0	0	50	16	1641303	0.360923	1
PCF11	308252	305	10	299376	83592	0	6	1	0	50	11	1468584	0.361023	1
TAB2	431448	177	42	132921	37665	0	6	0	0	11	12	438480	0.361221	1
OR2AG2	424776	548	8	58077	18954	0	1	0	0	50	28	1500903	0.361464	1
SYT8	916434	481	33	75438	25002	0	3	1	0	48	22	1389663	0.36147	1
CD163L1	931883	567	13	283311	76329	0	4	0	0	24	3	827874	0.361497	1
TMEM135	159214	587	-7	91989	24084	0	1	0	0	50	11	1604691	0.361595	1
C12orf49	228972	411	-2	40959	10395	0	1	0	0	50	15	1550583	0.361635	1
SPDYE3	1430637	204	54	107676	29214	0	3	1	0	50	23	1379322	0.362364	1
PPP6C	951081	168	46	67230	18387	0	1	0	0	50	21	1621458	0.362452	1
NOLC1	1041024	187	45	136863	37125	0	2	0	0	50	28	2179332	0.362501	1
MGAT1	830596	566	25	81837	26541	0	6	2	0	9	8	315630	0.362923	1
FAM47A	7968	NaN	-15	147042	45576	0	4	1	0	30	16	1082646	0.362958	1
CRTC1	1398467	222	29	123768	39123	0	3	0	0	15	5	518454	0.362982	1
IFIT1	253827	213	17	92907	23814	0	3	0	0	50	23	1228797	0.362998	1
FAM168A	521861	311	48	46008	13608	0	1	0	0	50	14	1630746	0.363121	1
CENPJ	481837	639	18	265086	65475	0	5	1	0	50	15	1339227	0.363449	1
P2RX3	923815	191	-3	79596	21006	0	2	0	0	50	29	1362204	0.363461	1
SASH1	77939	454	-8	240030	69390	0	7	3	0	50	21	1507059	0.363467	1
THSD4	312827	505	3	198288	54675	0	3	0	0	50	12	1479546	0.36368	1
REEP2	1196831	209	49	49383	14364	0	2	0	0	50	39	1755378	0.363775	1
FAM83D	263385	581	30	114480	36342	0	2	0	0	50	24	1662606	0.363778	1
POU3F4	12933	NaN	-23	67716	20412	0	2	0	0	50	37	2035503	0.363896	1
FBXW4	764146	385	29	78975	23976	0	2	0	0	50	20	1552554	0.363999	1
PNLDC1	652619	453	26	105867	26568	0	4	0	0	50	32	1623186	0.364391	1
AVPI1	514755	143	54	28188	8424	0	1	0	0	50	35	1499121	0.364529	1
SNX30	573618	453	19	85347	23679	0	2	0	0	50	18	1433835	0.364625	1
SHISA4	736064	208	24	37908	11502	0	1	0	0	50	39	1951884	0.364663	1
RNF167	1416161	231	30	67473	20412	0	2	0	0	50	18	1416825	0.364915	1
C15orf38	969942	239	29	44172	12609	0	2	0	0	50	44	1531494	0.364976	1
TMEM9	572258	333	23	36072	10260	0	1	1	0	34	20	1156545	0.365092	1
DCLRE1A	264051	515	7	202392	53163	0	4	2	0	50	22	1671327	0.36518	1
HAND1	581156	416	29	40338	12474	0	1	0	0	50	28	1531440	0.365273	1
DDX23	1655612	214	57	160326	44199	0	5	0	0	50	21	1512567	0.36535	1
SULT6B1	545763	253	35	54189	12555	0	1	0	0	50	32	1708803	0.365395	1
SHARPIN	2720766	211	27	72549	24651	0	2	1	0	31	16	1025703	0.365454	1
EIF4A3	674340	219	22	81837	21843	0	2	0	0	50	41	1903824	0.365551	1
RBM34	592746	168	26	87372	22302	0	2	0	0	50	15	1347732	0.365656	1
ARHGEF38	233591	486	15	43848	10584	0	1	0	0	50	21	1288521	0.36569	1
DLGAP2	99986	671	-37	187137	53595	0	5	0	0	12	3	664389	0.365811	1
FAM9C	209806	NaN	58	35505	7344	0	1	0	0	50	22	1866510	0.366426	1
PRNP	556280	447	11	48924	13446	0	2	1	0	9	2	232335	0.366476	1
SLC25A6	NaN	NaN	NaN	58914	17712	0	2	0	0	50	49	3024540	0.36654	1
CFH	198896	941	-26	246564	60912	0	7	1	0	50	28	1764612	0.366603	1
MEST	325887	298	31	66825	18387	0	2	0	0	50	23	1534464	0.366644	1
CDK8	96507	578	22	93798	23247	0	2	0	0	50	16	1520343	0.366704	1
OR10H5	808269	590	18	58131	18576	0	1	0	0	50	23	1844019	0.366707	1
CCBL1	1706086	201	24	84510	22167	0	3	1	0	50	40	1892673	0.366882	1
B4GALT4	248430	588	3	67689	17766	0	3	2	0	19	14	535626	0.366916	1
SERPINB5	200746	166	24	74088	19224	0	1	0	0	50	15	1449144	0.366918	1
BAMBI	204133	418	13	50490	13581	0	1	0	0	50	23	1600209	0.366992	1
FOLH1	11046	1009	-19	149040	39285	0	3	1	0	50	21	1622349	0.367275	1
ORAOV1	441431	536	41	28377	6453	0	1	0	0	50	23	1549017	0.36735	1
STRA8	425774	594	40	65664	17199	0	1	0	0	50	26	1711017	0.367407	1
ATF6	407279	420	16	131652	36423	0	3	1	0	50	22	1255959	0.367551	1
EGR2	176901	852	32	87129	29430	0	2	0	0	50	20	1769310	0.367627	1
DUSP23	801453	497	6	27675	9666	0	1	0	0	50	22	1448199	0.36776	1
GRB7	1448852	226	36	103734	30321	0	4	1	0	50	53	2128005	0.367814	1
WISP1	235882	481	12	70929	20115	0	2	0	0	50	25	1399599	0.367847	1
RBM38	181292	604	9	30240	9693	0	2	1	0	7	4	169749	0.367877	1
SETD3	340080	429	-11	120096	31941	0	4	0	0	50	30	1706535	0.368058	1
ZNF117	216422	994	-9	95796	22464	0	1	1	0	50	20	1617705	0.36815	1
MTSS1	481244	561	39	145314	42606	0	3	2	0	50	26	1593675	0.368284	1
CRYBA4	161795	547	-4	39204	10287	0	1	0	0	50	18	1706022	0.368342	1
CMTM6	436595	592	31	35181	10503	0	1	0	0	19	5	535005	0.36856	1
ZC3H14	169650	686	-1	171396	44226	0	2	1	0	50	10	1529415	0.368583	1
PDK4	195488	393	-3	81594	21762	0	1	0	0	50	19	1675809	0.368749	1
EMP1	636324	203	-3	30996	8694	0	1	0	0	50	41	1649862	0.368931	1
BHLHE40	274112	183	33	78543	23112	0	1	1	0	50	14	1324998	0.368988	1
GSS	968413	236	40	91881	27432	0	2	0	0	50	30	1723977	0.369177	1
FNDC5	1019374	232	15	32103	8316	0	1	0	0	50	21	1601613	0.369255	1
TNFRSF21	206419	389	1	124038	36990	0	2	0	0	50	23	2021895	0.369354	1
[truncated: 16,863 more rows]

## Sheet: Recurrences_MutSigCV
gene	expr	reptime	hic	N_nonsilent	N_silent	N_noncoding	n_nonsilent	n_silent	n_noncoding	nnei	x	X	p	q
BAGE2	NaN	NaN	NaN	33960	9720	0	12	0	0	50	60	4464280	3.80337e-08	0.000717391
TP53	2069567	213	34	123560	34120	0	28	0	0	9	2	237320	1.17549e-06	0.0110861
GYPB	146672	990	-12	27640	7640	0	7	0	0	50	14	2189680	1.37472e-05	0.0652614
ACSM2A	181483	823	6	167600	46720	0	15	0	0	50	13	2062840	1.89452e-05	0.0652614
USP8	325514	203	30	327120	84840	0	33	1	0	11	11	786160	2.00101e-05	0.0652614
PCMTD1	63777	905	2	105520	25760	0	14	1	0	50	16	1871000	2.07596e-05	0.0652614
RHPN2	458398	356	-12	198840	55440	0	17	2	0	50	29	2448360	0.000176966	0.476847
FRG2B	50016	525	-16	79760	22240	0	13	1	0	42	24	2034200	0.000367396	0.866227
GXYLT1	172471	684	-9	128400	33720	0	13	1	0	50	35	3331880	0.000840048	1
C5orf60	NaN	NaN	NaN	78480	24240	0	8	1	0	50	61	4478800	0.000983445	1
DDX11	335562	591	-4	291000	71640	0	25	3	0	40	20	1386800	0.00116843	1
HLA-DRB5	1070559	595	14	77200	21560	0	8	0	0	50	39	2552760	0.00123529	1
OR2T5	112460	903	-20	87640	26120	0	7	0	0	50	21	2482440	0.0015178	1
SIGLEC10	393294	583	17	196120	59960	0	12	0	0	22	10	1547480	0.00168077	1
SIRPB1	421731	424	39	216840	66120	0	11	2	0	50	27	2472560	0.00233032	1
STX11	298896	322	23	81360	22800	0	16	1	0	30	19	1481160	0.00293095	1
NUP50	395347	362	-13	135040	37160	0	8	0	0	50	20	2246480	0.00336604	1
PRAMEF1	141239	571	18	134160	38520	0	13	2	0	14	4	478400	0.00387356	1
TYW3	104029	1055	-14	77840	18640	0	6	0	0	50	26	3004280	0.00440345	1
OR2T4	104321	936	-39	97640	28000	0	13	1	0	9	3	274440	0.00540534	1
ING3	105792	514	7	125960	31840	0	7	1	0	25	7	1374360	0.00594015	1
CLEC18B	475713	278	44	134040	35880	0	9	1	0	50	36	2419520	0.00611375	1
NBPF10	NaN	NaN	NaN	1056120	263160	0	44	7	0	50	67	4717720	0.0061751	1
FOXD4L1	528113	595	15	109160	38080	0	10	1	0	50	43	2225240	0.00664757	1
ZCRB1	174511	545	18	66840	15000	0	4	0	0	50	30	2200640	0.007638	1
CBWD1	230380	398	-4	124760	30760	0	7	0	0	50	19	2355360	0.00822669	1
GBE1	54244	720	0	207800	52480	0	8	1	0	23	4	1159800	0.0097022	1
CCS	1343990	194	62	79400	23200	0	7	0	0	50	35	2247440	0.0104134	1
HS6ST1	406221	635	24	114080	34960	0	6	1	0	50	32	2339200	0.0109648	1
TMIGD1	475180	232	26	77600	19960	0	5	0	0	50	26	2011160	0.0113829	1
IER3IP1	148377	504	8	23920	7160	0	3	0	0	50	16	2560440	0.011698	1
ZNF645	91162	NaN	2	119960	33640	0	6	0	0	49	25	2530280	0.0130344	1
FAM105A	514082	380	28	105360	26520	0	6	0	0	50	22	2225320	0.0183783	1
NDUFB2	329944	567	29	31240	8600	0	2	0	0	50	31	2797240	0.0188962	1
OR11H12	141957	747	-11	90880	26600	0	5	0	0	50	18	2588520	0.0190982	1
RAB42	816470	183	25	29320	8840	0	2	0	0	50	33	2317120	0.0196274	1
RFPL3	413546	556	-16	89040	25920	0	6	0	0	50	31	2489200	0.0205503	1
TAS2R30	371136	676	4	89400	25800	0	7	1	0	50	37	2283760	0.0207303	1
GYPA	131210	1033	-8	45080	12160	0	4	0	0	50	21	2267720	0.0213181	1
KRTAP19-2	14979	1035	-68	15120	3720	0	2	0	0	50	33	1591960	0.0214782	1
MCM9	116680	856	16	113640	30360	0	7	2	0	37	15	1350640	0.0222344	1
PPIAL4G	119504	375	34	47160	12480	0	4	0	0	50	21	2283520	0.0226357	1
TCP10L2	NaN	NaN	NaN	101400	29280	0	7	0	0	50	60	4483840	0.0226793	1
CST7	545344	676	-29	42360	11640	0	3	0	0	50	23	2163040	0.0233276	1
MOXD1	188578	673	1	178880	47680	0	5	0	0	50	12	2542200	0.0268463	1
YY2	93077	NaN	16	105680	28600	0	6	1	0	50	16	2266800	0.0271477	1
RGR	216056	869	-4	84280	25400	0	5	1	0	50	24	2201480	0.0296523	1
HLA-DPB1	1479000	431	28	74320	21560	0	4	0	0	50	37	2011560	0.0298027	1
TFDP2	488711	410	27	141920	37840	0	5	0	0	50	27	2535840	0.0298976	1
GDNF	176444	628	4	60080	17080	0	5	0	0	50	23	2169480	0.0310955	1
ZNF814	NaN	NaN	NaN	249000	60120	0	10	2	0	50	62	4514680	0.0325346	1
SAMD3	84835	891	27	156360	37920	0	6	0	0	45	21	2169760	0.0336122	1
BRD9	875343	491	30	184640	38560	0	11	0	0	9	3	417400	0.0344468	1
FCGR2A	741254	448	41	92840	24760	0	8	0	0	5	2	252640	0.0347109	1
ZNF773	459366	828	-31	128840	32080	0	8	1	0	50	31	1848880	0.0359725	1
KRTAP4-9	NaN	NaN	NaN	60360	15600	0	3	0	0	50	60	4470160	0.0362787	1
DMRTA2	147973	639	-7	93080	35560	0	3	0	0	50	9	2860360	0.0366503	1
HRAS	1970020	236	42	61800	17280	0	6	1	0	50	40	2276320	0.0366567	1
KIF22	NaN	NaN	NaN	188160	58320	0	8	0	0	50	60	4512880	0.0371701	1
KLHL2	171218	540	5	179520	45840	0	7	0	0	32	13	1404320	0.0375596	1
SIVA1	711772	247	36	49880	15160	0	3	0	0	50	25	2115800	0.0379626	1
LDHAL6B	NaN	NaN	NaN	107000	30760	0	5	1	0	50	61	4485320	0.0383976	1
OR2J3	155147	738	1	85400	26800	0	4	1	0	50	27	2785280	0.039455	1
PDE4DIP	NaN	NaN	NaN	828640	227480	0	26	5	0	50	65	4682040	0.0415026	1
TMEM60	253754	795	28	37880	10840	0	2	0	0	50	22	2294240	0.0417752	1
ADRA2B	792336	366	41	121040	40240	0	7	1	0	50	43	2914120	0.0422124	1
CREB3L3	2256881	244	42	130080	40560	0	5	0	0	50	37	2414680	0.0429676	1
KCNJ5	194422	602	1	118560	33600	0	6	0	0	50	21	2279160	0.0430137	1
OR10G9	107524	830	-5	84920	27160	0	7	2	0	13	6	410600	0.0432871	1
FMR1NB	96935	NaN	-13	75680	19120	0	3	0	0	50	13	2400800	0.0434442	1
HN1	1511891	168	25	58640	11080	0	4	0	0	50	29	2096560	0.0434776	1
OR51E1	212267	935	-3	87000	28320	0	4	0	0	50	22	2398040	0.0440578	1
OR8B3	149616	857	0	87560	25240	0	4	0	0	50	18	2587800	0.0444719	1
INSL5	335045	692	-16	39200	10480	0	2	0	0	50	16	2008880	0.0448431	1
TRAPPC5	688482	384	31	51400	17360	0	6	0	0	37	21	2020000	0.0461055	1
ACTN2	427180	682	-10	264600	67200	0	7	2	0	50	9	1673440	0.0468109	1
PCMTD2	442044	440	43	104120	28600	0	5	1	0	44	24	2015320	0.0469608	1
CGB7	2070141	200	35	45440	15520	0	3	0	0	50	29	2038520	0.0470926	1
TMEM35	422603	NaN	29	45680	15280	0	3	1	0	47	25	1950520	0.0474632	1
ZBED2	188186	406	-14	61760	17080	0	2	0	0	50	17	2463800	0.0484163	1
ANAPC16	764632	140	40	31800	9600	0	2	0	0	50	30	2367320	0.0502432	1
HS3ST1	74823	1201	3	85360	25520	0	3	1	0	50	23	2480760	0.051013	1
PCP2	611341	384	33	39880	11240	0	2	0	0	50	17	2327040	0.0520403	1
MRPS12	1794625	282	21	38160	12840	0	4	0	0	50	44	2226360	0.0536683	1
RABGAP1L	235125	938	7	253240	63800	0	9	1	0	50	21	2509760	0.0538635	1
HNRNPCL1	NaN	NaN	NaN	83840	22480	0	5	0	0	50	60	4477040	0.0539868	1
CCDC127	1040169	530	24	74920	20000	0	6	0	0	50	37	2096360	0.053997	1
MCFD2	809702	242	33	61640	15040	0	4	0	0	50	43	2084200	0.0544423	1
XAB2	611341	384	33	248120	69160	0	7	1	0	50	17	2327040	0.0549589	1
S100A7	1140114	279	38	31000	6920	0	2	0	0	50	34	2005480	0.0565674	1
NOTCH2	429750	510	14	713520	192240	0	12	0	0	12	0	686160	0.0571092	1
MET	558228	262	2	406000	110840	0	14	1	0	26	15	1350000	0.0591556	1
KIAA1462	184440	520	12	379360	111680	0	8	3	0	43	16	2391240	0.0593509	1
SH3BGRL	137219	NaN	-22	34160	8680	0	2	0	0	50	27	2535240	0.060514	1
BATF3	399829	364	30	36600	10440	0	2	0	0	50	24	2379120	0.0614259	1
AMZ2	764688	237	11	105680	26920	0	5	0	0	50	32	2441680	0.0615915	1
LYZL4	342219	527	19	43520	11320	0	4	0	0	50	34	2503240	0.0621767	1
CLIC6	284989	406	43	191400	58320	0	5	0	0	50	22	2601080	0.062435	1
SOX17	240943	554	-8	113400	36480	0	3	0	0	50	17	2446920	0.0625086	1
C19orf24	NaN	NaN	NaN	35960	13240	0	2	0	0	50	60	4467800	0.0628011	1
ENPP6	256949	424	-5	127240	34880	0	4	1	0	50	20	2308560	0.0649518	1
TMEM200B	598249	235	19	79680	31680	0	4	0	0	50	20	2067720	0.0650048	1
OR10A3	105341	679	6	86960	26320	0	2	0	0	40	13	2407520	0.0654141	1
EXTL3	403198	327	42	255640	77480	0	11	0	0	50	28	2259000	0.0654218	1
HTR1D	956630	169	10	102360	33720	0	5	1	0	50	35	2255560	0.0658687	1
ANAPC1	NaN	NaN	NaN	568440	154320	0	16	4	0	50	64	4608880	0.0659413	1
RNF182	256934	590	20	68440	20840	0	3	0	0	50	23	2079520	0.0664232	1
C9orf106	1220935	283	48	64040	20560	0	4	0	0	10	5	539760	0.0668656	1
FAM104B	214019	NaN	18	49160	10840	0	2	0	0	50	38	2338760	0.067939	1
CMBL	625000	192	9	72960	18000	0	3	0	0	50	19	2413040	0.0684741	1
SLC22A9	1061448	478	28	158160	45600	0	5	0	0	50	37	2625880	0.0684996	1
TCEAL2	132641	NaN	4	66640	15920	0	2	0	0	50	15	1946240	0.0689193	1
FPR1	436280	690	-24	96040	30800	0	3	0	0	50	16	1861720	0.0696205	1
ZNF678	606105	575	-6	170320	40280	0	7	0	0	50	23	2447720	0.0697905	1
C15orf38	969942	239	29	65440	18680	0	5	0	0	50	26	2268880	0.0707184	1
MORN5	220092	528	30	49320	11160	0	3	0	0	50	21	2268920	0.0707403	1
OR4C3	278638	642	-40	90600	27960	0	4	0	0	22	22	1286000	0.0708293	1
FAM177B	221712	236	-4	48000	11160	0	2	0	0	50	27	2532120	0.0709483	1
OR4A16	1067	1102	-42	91560	26640	0	6	0	0	50	24	2238880	0.0713431	1
BAX	1927185	211	43	72160	21680	0	3	0	0	50	40	2310400	0.0718889	1
SLC25A1	487560	277	18	88880	27280	0	3	0	0	50	24	2247440	0.0724159	1
CCL22	716661	153	38	27320	7720	0	2	0	0	50	29	2175920	0.0733806	1
CLDN23	174979	307	34	78640	26840	0	4	1	0	47	23	1876600	0.0733913	1
REG3A	10958	1389	-22	52320	13920	0	2	0	0	50	29	1969520	0.0736244	1
IL17C	802673	189	41	53960	18520	0	3	0	0	50	36	2331480	0.0741549	1
FSCN3	411207	619	-7	141760	40520	0	6	2	0	50	21	1690840	0.0750247	1
SDPR	158359	484	4	120240	33600	0	5	1	0	35	13	1343000	0.0762775	1
CTXN3	284904	682	29	23000	7000	0	1	0	0	50	21	2545320	0.0773011	1
LPL	203407	316	8	139080	36720	0	4	0	0	50	22	2263080	0.0774923	1
APOC3	421374	323	39	29360	8080	0	2	0	0	50	30	2079080	0.077506	1
GP9	1155221	379	52	47440	17120	0	3	0	0	50	33	2221240	0.0780244	1
LAX1	515575	280	39	118720	32000	0	4	0	0	50	24	2086040	0.0782879	1
SDR42E1	207928	635	13	109720	33080	0	4	1	0	50	36	2887640	0.0785463	1
MYL12A	551966	328	55	51640	11720	0	2	0	0	50	32	2213040	0.0791362	1
ZCCHC13	404685	NaN	26	46920	13440	0	2	0	0	50	27	2760120	0.0792293	1
MAK16	91648	507	12	92040	21120	0	3	0	0	50	18	2770800	0.0793805	1
NACC1	1948449	221	41	148840	43640	0	10	2	0	50	46	2409760	0.0799979	1
OR10X1	179404	940	1	89320	27320	0	3	0	0	40	16	2045560	0.0800926	1
RBMX	275533	NaN	28	125480	26320	0	6	1	0	50	28	2415720	0.0805173	1
ADAM21	423685	706	22	204880	55400	0	7	0	0	50	28	2899840	0.0806563	1
SELPLG	448698	280	40	107640	38400	0	5	1	0	50	22	2146600	0.0807991	1
SGMS2	144491	683	6	105080	28600	0	3	0	0	44	17	2588240	0.0817519	1
NKIRAS1	399346	319	6	56280	14640	0	3	0	0	50	30	2510320	0.0820096	1
KLF3	294258	364	39	99320	27640	0	6	1	0	50	17	1941600	0.0821813	1
TIMP1	775214	NaN	38	60960	16560	0	2	0	0	50	33	2647320	0.0831054	1
AADACL4	145424	454	23	114440	33880	0	4	0	0	50	22	2209080	0.0832855	1
PKDCC	210167	164	-5	135160	45560	0	4	0	0	50	20	2318000	0.0839518	1
C15orf59	313132	435	29	81000	25320	0	4	0	0	50	28	2580880	0.0839754	1
LRRC3	893345	411	43	69240	23640	0	6	1	0	35	25	1708880	0.0840136	1
UTS2R	2598845	179	36	100640	39640	0	5	1	0	50	22	2296680	0.0840582	1
OR10G8	158396	830	-10	84680	27640	0	3	0	0	50	19	2679600	0.0842831	1
TMEM190	1028808	209	19	51880	14600	0	2	0	0	50	48	2044480	0.084362	1
ZNF76	682809	264	39	165160	46640	0	6	0	0	50	33	2841280	0.0846305	1
PDPR	1339196	137	19	255840	69120	0	8	3	0	48	24	2183160	0.0846455	1
LRFN2	100435	887	20	213840	71520	0	7	2	0	50	23	2743120	0.0846596	1
BDKRB2	330952	500	10	109640	32440	0	4	0	0	50	26	2360240	0.0848213	1
SOX7	110362	481	9	106120	34640	0	2	0	0	50	14	2517200	0.0848533	1
DEPDC5	557139	336	19	472160	124360	0	9	0	0	35	13	1702280	0.0851457	1
LRP5L	155932	535	-31	72160	20360	0	3	0	0	50	27	2453360	0.0852455	1
PLEKHF1	222973	612	-63	77600	23680	0	7	1	0	50	87	3316920	0.0852919	1
BCLAF1	286851	153	21	265880	70960	0	9	2	0	50	37	2902080	0.0859948	1
TRAPPC6B	314417	166	13	48240	11400	0	2	0	0	50	26	2162000	0.0872053	1
BCL10	348743	384	3	65920	19280	0	2	0	0	50	24	2264200	0.0872913	1
THAP8	980636	320	19	74400	26040	0	3	0	0	50	35	2085000	0.0874289	1
GPR32	652250	593	27	96840	31560	0	4	1	0	24	9	831440	0.0876168	1
NUS1	190019	639	3	83920	23840	0	2	0	0	48	20	2278400	0.0878852	1
CHRNB4	485971	455	45	140240	41800	0	7	0	0	43	25	2093920	0.0889335	1
SNX33	586224	231	34	163120	44600	0	8	1	0	50	27	2211800	0.0893916	1
C21orf2	1153513	308	65	71920	23480	0	3	0	0	50	33	2137840	0.0900273	1
NDRG4	678092	320	0	116040	32280	0	6	0	0	21	14	1133200	0.0908281	1
FTO	215906	604	-13	147520	38480	0	6	0	0	18	4	741040	0.090954	1
MOGAT2	528291	418	45	95360	27520	0	4	0	0	50	43	2812800	0.0910128	1
FAM46D	102816	NaN	-24	111840	29040	0	3	0	0	50	20	2783720	0.0910789	1
TCEAL6	132641	NaN	4	53480	13240	0	2	0	0	50	15	1946240	0.0912985	1
MGST3	321831	408	0	44720	12760	0	2	0	0	50	26	2459600	0.0917022	1
KIAA1644	218812	280	16	57880	16160	0	2	0	0	50	37	2067640	0.0919246	1
PER3	370145	415	23	345680	96640	0	17	5	0	26	17	1131120	0.0925551	1
RNF6	96737	562	25	193040	55360	0	5	2	0	50	23	2145200	0.0925946	1
RALB	221264	444	37	61000	15440	0	2	0	0	50	24	2559000	0.0928401	1
ACTR3B	190917	535	5	123400	32720	0	4	1	0	50	22	2305400	0.0929734	1
EBAG9	134329	623	8	64080	15840	0	3	0	0	50	26	2283400	0.0930814	1
CDC34	1647685	255	-8	68160	19080	0	4	1	0	39	27	1650600	0.0932308	1
AKT1	711772	247	36	142600	36800	0	4	1	0	50	25	2115800	0.0940946	1
UGP2	312741	380	10	147320	40240	0	3	0	0	50	21	2632840	0.0941481	1
OR10G4	107524	830	-5	84920	27160	0	3	1	0	50	22	2208520	0.0946395	1
FAIM	198181	515	26	68240	16720	0	2	0	0	50	22	2273120	0.0960979	1
RNF222	NaN	NaN	NaN	59120	20920	0	3	0	0	50	60	4475480	0.0963676	1
STARD4	181104	636	26	61400	15160	0	2	0	0	50	19	2186920	0.0968851	1
ALX4	301098	575	9	115080	34680	0	4	0	0	50	15	2335440	0.097329	1
PAXIP1	162706	628	-6	314080	80960	0	5	0	0	50	13	2954720	0.097417	1
F2R	257923	372	46	118160	35680	0	3	0	0	50	21	2280800	0.0975183	1
NDEL1	761259	427	18	104920	28160	0	4	1	0	50	33	2611160	0.0978568	1
BEND4	263825	496	24	150520	44000	0	4	1	0	50	21	2152280	0.0981685	1
GFOD2	1157184	136	50	106360	33560	0	5	1	0	50	24	2040320	0.0982092	1
ASPHD2	163136	553	-46	103600	30560	0	6	1	0	50	41	2275400	0.0992034	1
OR10J1	347588	699	-5	88760	27280	0	3	0	0	50	19	1990960	0.0994262	1
IL17A	313277	556	11	43960	13400	0	2	0	0	50	33	2245200	0.0995981	1
SSPN	157088	383	25	68040	21000	0	2	0	0	50	16	2286200	0.0998509	1
SLC10A3	2163759	NaN	42	127120	44960	0	5	1	0	50	35	2483480	0.100089	1
GEMIN7	1135715	208	25	35840	12160	0	3	0	0	50	35	2160680	0.100696	1
S1PR3	248480	646	4	104400	32040	0	3	1	0	50	20	2320800	0.100839	1
SULT1E1	9735	1009	4	89560	20000	0	2	0	0	50	23	2552440	0.101423	1
OR8B2	149616	857	0	87240	25680	0	2	0	0	50	18	2587800	0.101857	1
MYF5	27810	974	-1	72440	20680	0	2	0	0	50	17	2279800	0.102143	1
PRPS1L1	89480	675	-1	89360	25960	0	3	0	0	50	17	2323680	0.102477	1
RIMKLB	302894	262	17	109960	31760	0	3	0	0	50	21	2355360	0.102588	1
OR13C5	147494	920	-31	88680	25920	0	3	0	0	50	26	2249120	0.102955	1
OR51D1	212267	935	-3	88160	29320	0	2	0	0	50	22	2398040	0.10376	1
RPS15	2352825	221	38	42120	12360	0	2	0	0	50	23	2059520	0.103775	1
MID1	117200	NaN	14	192080	52720	0	6	1	0	47	18	2346080	0.104157	1
PENK	411547	624	-16	77240	20440	0	2	0	0	50	30	1913320	0.104604	1
SNAPC2	952640	320	27	90440	32320	0	5	1	0	50	46	2351920	0.104713	1
CEPT1	388536	627	27	120560	33400	0	2	0	0	43	14	2950400	0.106147	1
CCNA1	197057	880	1	133120	38480	0	4	0	0	50	17	2369960	0.106355	1
DEGS2	405420	237	39	89600	28240	0	4	1	0	50	24	2078200	0.106626	1
OSR1	63105	842	-9	74040	23040	0	2	0	0	50	42	3246160	0.107003	1
MNS1	211810	681	12	152240	30640	0	5	0	0	50	23	2132960	0.10741	1
CLEC3A	44717	1261	-26	57400	15080	0	2	0	0	50	37	2312600	0.107547	1
FAM120B	366503	600	-4	262320	70440	0	14	2	0	28	18	998360	0.108173	1
SIGLEC1	942842	353	32	468120	157080	0	12	3	0	46	30	2258000	0.10854	1
RPL10L	10737	1057	-48	60800	17080	0	2	0	0	50	20	2290400	0.108707	1
OR8K5	10101	1007	-38	86000	24760	0	2	0	0	50	21	2572880	0.109369	1
RPRM	22780	737	-11	29920	9680	0	1	0	0	50	32	3413080	0.109525	1
DUSP21	66992	NaN	15	53120	15640	0	3	1	0	19	5	738520	0.109813	1
APOL2	1237332	331	42	94920	28200	0	4	1	0	50	34	2808240	0.110318	1
DBNDD2	1037999	382	35	52520	14920	0	2	0	0	50	27	1958200	0.110532	1
INHBB	218512	446	15	111440	36160	0	3	0	0	26	8	1365880	0.110792	1
OR10C1	404210	854	21	83320	29240	0	2	0	0	50	10	1867000	0.112086	1
ASB17	140995	603	-11	84280	23480	0	2	0	0	50	23	2577960	0.112175	1
B3GNT2	316454	412	38	113400	30360	0	4	0	0	35	14	1614200	0.112208	1
ADIPOR1	421206	389	30	107960	30760	0	3	0	0	50	24	2316240	0.11255	1
CCDC134	1384410	199	52	67680	18000	0	4	0	0	50	30	2107800	0.11315	1
RAD51C	524193	222	17	109160	30880	0	3	0	0	50	12	2191400	0.113226	1
PTH2	2173457	290	44	26600	10720	0	1	0	0	50	37	2230400	0.113505	1
RETNLB	129526	941	-3	32680	8840	0	1	0	0	50	18	2321840	0.113783	1
ZNF696	1657385	389	19	104160	31800	0	8	0	0	50	36	2270640	0.113857	1
PROZ	759371	229	38	115960	32000	0	3	0	0	50	24	2549200	0.114374	1
NR4A3	280636	538	8	186600	55800	0	6	2	0	50	24	2637040	0.114459	1
SPSB4	245950	574	22	73800	25320	0	3	1	0	43	25	1819880	0.114528	1
KCTD7	615008	246	43	82040	24280	0	3	0	0	50	45	2555320	0.114528	1
PIAS3	NaN	NaN	NaN	178240	54680	0	5	2	0	50	62	4509240	0.11475	1
PLAC9	399614	626	2	27840	8880	0	1	0	0	50	31	2580520	0.115509	1
ITPKC	1127178	201	27	192360	57000	0	8	2	0	50	39	2208120	0.115576	1
FBRS	2255010	158	60	126720	44040	0	5	1	0	50	52	2603480	0.116315	1
NFIB	135826	563	-17	121960	33440	0	3	0	0	50	26	2810640	0.116959	1
XRCC6BP1	844463	298	22	72960	18600	0	3	0	0	50	28	2318000	0.117094	1
PARD6B	480540	161	43	105560	29680	0	4	0	0	50	23	1846320	0.117902	1
PARD3	139914	776	0	397640	106600	0	12	1	0	38	22	2020160	0.118144	1
ZXDB	80578	NaN	-18	219040	70400	0	4	0	0	50	18	2613680	0.118315	1
CDHR1	216191	860	-17	263000	78280	0	6	2	0	50	32	2842200	0.118489	1
ZFHX4	72333	731	8	1022840	284080	0	13	6	0	47	24	2876560	0.118577	1
C7	211302	644	5	247960	64040	0	6	0	0	39	14	1752080	0.118828	1
NFATC1	213864	598	6	274200	87840	0	14	6	0	19	10	807040	0.11886	1
ANXA9	1621279	172	30	101320	29000	0	4	0	0	50	30	2178160	0.119104	1
ZNF516	113406	813	18	320680	100400	0	7	2	0	44	14	2025200	0.119322	1
CRLF1	1397040	222	33	118720	37400	0	4	1	0	50	44	2511160	0.120115	1
ENGASE	592461	285	15	210440	63880	0	5	2	0	50	14	2269240	0.120172	1
PRB4	311837	673	-1	67640	23320	0	2	0	0	50	20	1845680	0.12054	1
GNPDA1	696239	321	48	85800	21480	0	3	0	0	50	23	2158880	0.120633	1
ELOF1	1152381	272	31	25400	6280	0	3	0	0	50	60	2201560	0.120694	1
MGAT3	812764	467	76	146160	46440	0	6	2	0	50	37	2167920	0.121	1
NHLRC1	487819	397	-1	106920	35880	0	3	1	0	50	19	2195960	0.121963	1
NRAS	600650	472	11	56280	14520	0	2	0	0	50	29	2362920	0.122118	1
PPOX	728669	234	37	134360	43720	0	3	0	0	50	18	2531280	0.122328	1
TSNARE1	163885	685	12	147280	44000	0	8	2	0	8	2	307200	0.122338	1
SYT6	760371	596	13	122680	34040	0	5	1	0	50	36	2743080	0.123121	1
TUBB	2115149	171	41	126440	35200	0	4	0	0	50	30	2598520	0.123226	1
TGIF2LX	8315	NaN	-35	68280	19560	0	2	0	0	50	22	2709200	0.123325	1
MRPL50	112947	898	-22	45240	12720	0	2	0	0	50	22	2424480	0.123796	1
CRYBB2	174680	535	-35	61560	15240	0	2	0	0	50	25	2234280	0.124211	1
ABHD10	239044	250	10	87640	25040	0	2	0	0	37	11	1773960	0.124469	1
APLP2	624855	203	15	225920	57280	0	6	0	0	41	17	1994880	0.124483	1
EPHX4	260329	242	1	105400	28160	0	3	0	0	50	27	2443160	0.124652	1
OR1L4	409923	553	12	86360	25960	0	3	0	0	36	20	1564000	0.124982	1
KRTAP4-7	NaN	NaN	NaN	44480	11680	0	4	1	0	4	1	158280	0.124985	1
TMEM14B	263716	468	14	34080	9720	0	4	1	0	16	24	594920	0.125428	1
GK2	112173	875	0	154360	45320	0	5	0	0	41	16	2138880	0.125508	1
HDGF	1649536	208	53	90480	23520	0	4	0	0	50	31	2440040	0.125883	1
APBA2	161108	927	-21	217280	58480	0	4	1	0	50	14	2532120	0.125951	1
PLXNA4	314659	746	9	571720	162800	0	11	2	0	40	10	2043280	0.126008	1
CSPP1	353616	640	25	373880	93280	0	7	1	0	50	18	2654880	0.126015	1
OR11H1	69794	916	-70	90840	26640	0	3	0	0	50	35	2104240	0.12653	1
SLC37A3	354350	587	28	161960	40840	0	4	1	0	50	19	2480120	0.127	1
TSPAN8	233516	489	-31	70560	18480	0	2	0	0	50	36	2496520	0.127001	1
FAM19A2	136152	930	-44	39280	10040	0	1	0	0	50	15	1904400	0.127227	1
GRN	1062294	172	38	172600	47000	0	5	1	0	50	31	2671400	0.127283	1
TARBP2	1590803	191	55	103760	32200	0	4	0	0	50	29	2195440	0.127494	1
JKAMP	168237	606	12	90560	24640	0	3	0	0	50	31	2107600	0.127841	1
TMEM186	401809	358	-9	59760	18000	0	3	0	0	50	28	2339400	0.127858	1
ATXN3	356163	415	27	111160	24200	0	3	0	0	50	28	2805720	0.1284	1
DRAM1	340236	238	17	69560	19360	0	2	0	0	50	27	2632840	0.128476	1
HOXB8	946208	524	29	68840	19480	0	2	0	0	50	28	1973560	0.12854	1
C15orf41	74456	598	-16	85600	21200	0	3	0	0	50	26	2560920	0.128601	1
SPC25	173915	724	7	68400	15480	0	2	0	0	50	24	2663840	0.129034	1
VPS26B	270368	601	18	97760	25960	0	2	0	0	50	14	2680440	0.129301	1
JRK	384374	412	23	164880	51000	0	10	0	0	50	33	2627800	0.129325	1
F2	965022	176	48	181240	49760	0	10	2	0	50	22	2059840	0.129372	1
TRPM3	135903	707	-9	505560	135360	0	12	1	0	50	36	3290560	0.129501	1
SOCS4	795059	144	37	126480	32760	0	6	0	0	50	35	2070160	0.129688	1
COX7A2L	251919	375	16	32920	9680	0	2	1	0	14	7	505800	0.129732	1
RAB40AL	208589	NaN	36	77080	23600	0	2	0	0	50	24	1814480	0.130144	1
C15orf48	214586	299	16	25800	6360	0	1	0	0	50	28	1967760	0.13031	1
DEFB114	70183	1258	-7	21000	4560	0	1	0	0	50	22	2188840	0.13056	1
KLK11	490795	632	22	87560	25720	0	3	0	0	50	26	1880800	0.130596	1
ZNRF2	626711	388	42	67840	21560	0	2	0	0	50	37	2714680	0.130874	1
BTG4	383632	485	15	67000	16040	0	2	0	0	50	28	2837120	0.131179	1
OR52N2	203856	922	-5	89440	26360	0	2	0	0	50	14	1910840	0.131492	1
AMOTL2	303429	189	21	216960	68520	0	6	1	0	41	22	2251640	0.131778	1
XCR1	225584	551	54	91720	29000	0	4	1	0	50	26	1858200	0.131935	1
FAM71A	409070	224	26	163800	50400	0	6	1	0	50	26	2414440	0.131942	1
LNX1	116784	492	26	216480	62040	0	7	0	0	50	21	2455080	0.132392	1
GALNT14	94332	876	6	162480	43320	0	4	1	0	39	14	1787440	0.132728	1
SYNPO2L	1042853	166	43	270080	95920	0	7	0	0	33	16	2117160	0.133262	1
ARG2	481915	260	42	101080	30080	0	3	0	0	50	26	1973840	0.133441	1
EIF2B4	1245306	182	52	156840	49080	0	5	0	0	50	25	2543760	0.133718	1
KANK4	280646	378	0	278960	83920	0	5	1	0	50	19	2949800	0.133754	1
FAM20C	195067	593	-4	78040	26720	0	3	0	0	50	21	2303760	0.133784	1
SYNCRIP	393389	384	14	185280	49440	0	5	1	0	50	26	2508240	0.13427	1
DEDD	NaN	NaN	NaN	90400	26360	0	4	0	0	50	60	4480920	0.134333	1
ANGEL1	308800	471	39	190400	55480	0	6	1	0	25	11	1128640	0.13464	1
MANEAL	445096	375	33	129480	37080	0	2	0	0	30	3	1288480	0.134682	1
SHOX2	162819	946	-8	99320	31240	0	2	0	0	50	15	2354280	0.13508	1
C12orf50	152672	507	-36	125760	28920	0	2	0	0	42	17	2055160	0.135127	1
MUC7	264556	861	26	100120	36920	0	2	0	0	31	10	1910440	0.135331	1
DUSP12	447958	504	29	98680	26720	0	2	0	0	26	5	1234840	0.13557	1
OR8D2	154391	921	-14	85720	26480	0	2	0	0	50	18	2175560	0.136045	1
LIMS2	603350	218	42	115760	30280	0	4	0	0	50	32	2170120	0.136124	1
MAD2L1BP	1424296	166	44	90800	27160	0	3	0	0	50	41	2673880	0.136323	1
NTF3	28523	735	17	76040	22240	0	3	1	0	37	20	1652520	0.136531	1
CSNK1A1L	156140	631	31	96440	25240	0	3	0	0	50	23	2499280	0.136591	1
NDST2	1009357	191	42	248400	75600	0	6	1	0	50	28	2759920	0.136694	1
ST6GALNAC5	319154	834	-17	96440	26800	0	3	0	0	22	9	916840	0.136756	1
IGBP1	166319	NaN	1	99440	25360	0	3	0	0	50	32	2773640	0.136879	1
RBM25	456437	274	42	249880	62600	0	10	0	0	50	29	2228440	0.137164	1
OR1N1	373314	646	3	86040	26280	0	5	0	0	50	45	2511160	0.137496	1
DCDC1	84163	938	-25	103480	27680	0	3	0	0	50	32	2627600	0.137714	1
ME3	346701	316	1	173600	50920	0	6	1	0	50	32	2655200	0.137864	1
EMILIN3	383021	309	5	206360	71200	0	6	1	0	50	29	2831760	0.137912	1
CNOT4	579978	407	19	193480	54080	0	3	0	0	50	15	2473160	0.138744	1
DBR1	190056	464	9	158760	40800	0	3	0	0	50	22	2508200	0.138862	1
DPT	358217	440	9	60480	13920	0	2	0	0	50	19	2374400	0.138939	1
ARGLU1	169398	1237	11	78000	22080	0	2	0	0	50	19	2228200	0.139468	1
MRPS16	829738	249	44	38960	11680	0	2	0	0	50	39	2582600	0.139495	1
ARF1	702621	391	5	53200	14240	0	3	1	0	26	23	994240	0.139713	1
OR2T3	112460	903	-20	88320	26520	0	2	0	0	50	21	2482440	0.139881	1
DNAJC30	1197825	214	52	61120	20840	0	2	0	0	50	41	2499480	0.139961	1
PTPN14	464456	404	-8	341560	94280	0	10	4	0	50	33	2313360	0.140559	1
SCTR	211577	497	30	128680	35840	0	3	1	0	50	19	2434560	0.140676	1
ACVRL1	493265	371	27	143400	42360	0	4	2	0	41	13	1382640	0.14081	1
HIST1H3B	408919	685	43	37200	12360	0	1	0	0	50	28	1896800	0.14092	1
METRNL	222738	483	14	85640	28120	0	8	2	0	16	8	469240	0.14099	1
ST6GALNAC3	259709	989	-11	90160	23360	0	3	0	0	50	19	2431720	0.141324	1
SMAD3	444194	194	45	131520	35040	0	5	0	0	50	26	1921560	0.141535	1
DUPD1	231745	298	44	62800	17720	0	2	0	0	50	24	2217720	0.141686	1
NFKBIZ	550073	421	16	206200	57920	0	4	0	0	50	19	2281800	0.142774	1
FAM71C	100701	906	0	68760	18840	0	2	0	0	50	16	2229240	0.142947	1
CDH6	133952	902	-26	226320	63240	0	5	2	0	50	22	2372800	0.143208	1
FBXO48	212087	617	30	46000	11120	0	2	0	0	50	23	1961920	0.143266	1
CSRNP1	213514	500	30	164200	50120	0	3	0	0	50	12	2370760	0.14336	1
NIPA1	352778	529	-8	91080	29880	0	2	0	0	50	27	2547000	0.14386	1
BHLHB9	162942	NaN	27	154080	43200	0	3	0	0	50	32	2841480	0.143898	1
RAB23	314024	348	23	71160	17400	0	2	0	0	50	24	2534840	0.14433	1
CYP4A22	364960	414	3	150960	42000	0	6	2	0	22	18	1223160	0.144503	1
TGM2	565545	141	41	201320	55960	0	5	1	0	50	15	2003920	0.144604	1
TMEM134	1392213	215	53	57160	16520	0	2	0	0	50	34	1736560	0.145071	1
SDHAF2	1404745	245	58	49240	12560	0	2	0	0	50	26	1793080	0.145192	1
DDA1	842088	211	43	31080	7920	0	3	1	0	12	20	520200	0.145757	1
CCDC93	195266	578	-2	191600	46960	0	5	0	0	50	22	2112200	0.145974	1
TBX18	28205	623	-12	169840	52400	0	4	0	0	5	1	538240	0.145976	1
ZNF641	809696	412	16	136000	36800	0	4	0	0	50	26	2226880	0.146132	1
PARS2	578299	343	23	131320	40520	0	4	1	0	50	35	2421960	0.146249	1
IRF7	1774224	236	57	145600	47240	0	4	1	0	50	22	2007600	0.147659	1
ZSCAN1	1187584	694	-42	113640	35040	0	5	1	0	32	18	1262320	0.148288	1
DGKE	320339	324	-38	165640	44120	0	4	0	0	50	33	2759120	0.148391	1
KCNMB2	144490	882	-8	68600	18280	0	2	0	0	50	34	3410040	0.149003	1
AQP1	402058	568	10	98120	31600	0	3	1	0	50	32	2029920	0.149492	1
MRPS23	873797	222	6	55520	15400	0	3	0	0	50	30	2175000	0.149566	1
EIF3A	701340	194	9	402760	105200	0	12	3	0	50	22	2467080	0.149638	1
RQCD1	939398	179	48	85920	25320	0	2	0	0	50	23	2315680	0.149841	1
ACSF2	1332860	200	23	178720	50240	0	5	0	0	50	33	2716680	0.150586	1
KIAA1199	265840	460	2	398480	105280	0	10	2	0	50	24	3034080	0.150739	1
PDE1B	643658	392	33	164280	43320	0	3	0	0	50	22	2346760	0.150854	1
CCL11	40425	871	-32	28280	7960	0	1	0	0	50	34	2243520	0.151165	1
LIPF	145689	327	40	118440	29520	0	2	0	0	50	19	2277640	0.151488	1
DARS	440321	410	30	150560	37360	0	4	0	0	30	11	1283080	0.151833	1
C9	168073	424	-8	164760	41880	0	4	0	0	50	30	2257920	0.152331	1
ACN9	146007	987	-9	36160	9680	0	2	1	0	8	4	304160	0.152343	1
IRF8	407770	461	27	123480	33960	0	3	0	0	50	30	2881320	0.152603	1
RUNDC3B	287293	839	-3	139280	36640	0	3	1	0	27	9	1165480	0.152852	1
CORO2B	396006	603	25	140080	38600	0	4	1	0	44	21	2265240	0.152929	1
TPTE2	288628	778	-16	158920	38960	0	5	0	0	20	10	675520	0.152973	1
MAGT1	549266	NaN	20	108160	28880	0	3	0	0	18	6	858080	0.153304	1
TSGA10	504327	770	19	208640	50680	0	6	0	0	50	25	2318440	0.153472	1
OR4C6	1295	1091	-20	86000	25360	0	2	0	0	50	25	2153120	0.153613	1
SRFBP1	70781	809	-4	126200	32200	0	3	0	0	42	16	1817040	0.153796	1
RNF144A	40925	1103	7	86240	22600	0	2	0	0	36	12	1826640	0.153895	1
KCNAB1	502198	782	4	167560	46160	0	4	0	0	30	13	1500080	0.154122	1
WDR70	302307	592	15	195320	49120	0	4	0	0	22	7	1341040	0.154161	1
PRPH2	975176	194	36	98280	27600	0	5	0	0	50	49	2653640	0.154213	1
ABCB8	622098	373	41	199760	66520	0	6	1	0	46	27	2670240	0.154289	1
PHKG2	1632278	158	61	121040	35080	0	4	0	0	50	32	2645600	0.154438	1
SESN1	385493	465	26	162560	40600	0	4	0	0	50	30	2685800	0.154503	1
TMIE	298503	495	41	45000	12960	0	2	0	0	50	27	2131760	0.154722	1
MICAL1	328699	559	47	304960	91040	0	6	0	0	28	5	1444240	0.154991	1
CPNE5	844979	244	43	176440	47240	0	6	1	0	50	34	2598760	0.155271	1
ANKRD33	570716	438	22	134320	38480	0	2	0	0	50	11	2175280	0.15537	1
SNRNP48	825677	209	14	102280	24200	0	3	0	0	33	22	1654040	0.155975	1
CDC25B	860065	241	43	168680	47680	0	5	1	0	50	34	2702760	0.156071	1
OR2W3	87551	993	-35	85040	28120	0	2	0	0	50	22	2723520	0.156319	1
CDYL	116037	445	26	156440	42640	0	4	1	0	50	20	2485320	0.15646	1
DNAJB11	592490	436	40	105560	28000	0	3	0	0	50	42	3298440	0.156699	1
C14orf177	157823	938	-42	36480	9840	0	1	0	0	50	12	1894560	0.156727	1
TOB2	1480984	187	73	95400	29280	0	4	0	0	50	37	1858520	0.156808	1
OR10S1	107524	830	-5	90480	29040	0	2	1	0	50	22	2208520	0.157017	1
PTGS1	343200	635	27	173200	47600	0	4	0	0	50	17	2741440	0.157165	1
PTGDS	1979517	188	34	56080	15560	0	5	1	0	16	15	650160	0.15722	1
IL18R1	235438	588	7	159400	40280	0	3	0	0	46	28	2554400	0.157746	1
KCNG4	582429	364	12	143160	44760	0	5	0	0	50	30	2662200	0.157893	1
ICA1	176442	544	19	145680	35280	0	3	0	0	50	24	2173440	0.158256	1
MC5R	131146	815	8	90560	26800	0	2	0	0	50	20	2296920	0.158298	1
KLK12	490795	632	22	80160	19320	0	2	0	0	50	26	1880800	0.158639	1
ZFP36L1	543449	259	46	92760	29760	0	3	0	0	50	33	2089680	0.158891	1
XAF1	936146	438	5	89920	21680	0	5	1	0	13	5	382720	0.158924	1
ADAT3	NaN	NaN	NaN	93040	33680	0	5	1	0	50	61	4488240	0.15894	1
RNF168	1173736	125	34	165440	43120	0	5	0	0	38	13	1891520	0.159449	1
DEFB115	562665	594	-29	25840	6680	0	1	0	0	50	28	1927760	0.159464	1
PDP1	319459	423	5	168440	47200	0	6	0	0	24	9	1163840	0.159568	1
SORBS3	757216	224	45	194720	56800	0	6	0	0	18	10	1045680	0.159631	1
ARRB2	1272092	222	28	120600	33720	0	4	1	0	50	39	2684560	0.160317	1
HAAO	344647	338	34	84040	23840	0	3	0	0	18	11	900840	0.160696	1
SPRY1	98850	613	21	90520	25160	0	2	0	0	50	18	2413360	0.160786	1
PTHLH	315469	581	-4	50560	15200	0	2	0	0	50	27	1709280	0.160979	1
PBLD	490115	250	17	92720	26080	0	2	0	0	50	20	2382000	0.161247	1
WDFY2	246186	384	46	119360	30280	0	3	0	0	50	21	2266040	0.161651	1
PLEKHO2	556478	205	50	136440	42720	0	5	1	0	50	31	2073920	0.161747	1
BTN2A2	378286	330	51	149320	42680	0	6	1	0	50	25	2374480	0.161954	1
KRCC1	169985	543	5	76320	17760	0	2	0	0	50	26	2276280	0.16231	1
CST8	188567	750	-16	41440	11000	0	1	0	0	50	15	2479160	0.162505	1
OXGR1	111002	623	-10	94720	27440	0	2	0	0	50	21	2365360	0.162917	1
RIMS2	198819	1035	-8	408320	112000	0	10	0	0	14	2	1053960	0.163136	1
CCDC47	1259976	346	12	145880	34120	0	6	1	0	50	69	2840200	0.163283	1
GABRB1	106512	689	24	137360	37480	0	3	1	0	50	53	5132960	0.163439	1
FAM122C	293030	NaN	27	110840	29680	0	2	0	0	50	22	3006280	0.163682	1
DUSP5	493408	157	51	106080	33960	0	3	0	0	45	21	2038080	0.163999	1
ST8SIA1	401092	910	-22	102360	28080	0	2	0	0	50	14	2019840	0.164131	1
C1orf53	98527	448	-18	41200	12560	0	1	0	0	50	12	2036280	0.164206	1
RCSD1	520615	405	14	118120	34880	0	3	0	0	50	21	2362920	0.164229	1
PRKG1	75025	995	-15	228920	58720	0	4	1	0	50	14	2322120	0.164238	1
WNT16	97501	535	-14	111200	30280	0	3	0	0	50	17	2692560	0.16442	1
RAB24	942017	227	53	61920	15360	0	3	0	0	50	57	2228120	0.164621	1
CLEC1B	305376	565	19	69120	16320	0	2	0	0	50	26	2939640	0.164684	1
KCNA5	160467	896	22	165720	55320	0	3	1	0	50	24	2620200	0.164845	1
PWWP2B	152612	271	-1	161320	54560	0	4	1	0	49	23	2311200	0.164924	1
ZNF705A	172474	438	26	89120	21400	0	2	0	0	50	14	2293320	0.165336	1
KHDRBS3	16039	1124	-24	100800	27960	0	3	0	0	50	34	2566760	0.165523	1
LHFPL5	621095	404	34	62560	18080	0	2	1	0	19	4	673880	0.165626	1
PPP3R2	112839	1008	-11	49960	12920	0	2	0	0	50	19	2473040	0.165631	1
SLC25A39	1036092	172	39	103080	31800	0	3	1	0	50	39	3353840	0.165791	1
CDK15	391799	588	32	114120	30720	0	2	0	0	20	8	1276800	0.165829	1
B4GALT3	728669	234	37	108880	35840	0	2	0	0	50	18	2531280	0.166736	1
KISS1	557652	370	34	38080	12920	0	1	0	0	50	30	2475480	0.167052	1
PRSS42	413835	495	38	83280	24360	0	3	0	0	50	28	1972280	0.168213	1
SLAIN2	310987	328	55	163400	49480	0	6	0	0	50	18	1814440	0.168539	1
MYADML2	NaN	NaN	NaN	81840	29280	0	2	0	0	50	60	4483840	0.168673	1
OCM2	451365	522	25	33320	7720	0	1	0	0	50	17	2663680	0.168741	1
JAM3	270247	601	6	102240	30000	0	3	1	0	50	25	2350200	0.168835	1
OR51G2	65798	1006	-15	85960	27440	0	1	0	0	50	10	2371320	0.168891	1
C1QTNF5	NaN	NaN	NaN	66280	22520	0	2	0	0	50	60	4477080	0.169206	1
CHCHD6	250457	604	39	69600	18960	0	2	0	0	50	15	1826760	0.169668	1
YWHAH	531528	344	-1	70400	19000	0	2	0	0	50	30	2232480	0.169724	1
GPR21	NaN	NaN	NaN	98160	27720	0	2	0	0	50	60	4482280	0.169739	1
COX6C	282641	537	29	22720	6080	0	1	0	0	50	31	2434800	0.169999	1
BCL2	207116	522	60	68080	22760	0	2	0	0	31	14	1221120	0.170018	1
SEC61A2	334974	227	29	144520	41120	0	4	0	0	30	21	2009440	0.170394	1
IRF2BP1	883734	203	39	155440	55160	0	7	3	0	22	17	1063640	0.17041	1
FGD1	299313	NaN	18	271880	82600	0	5	0	0	37	13	2076880	0.170694	1
CRMP1	101380	643	14	200080	58640	0	5	2	0	50	20	2007800	0.170794	1
GLUL	349818	783	5	108800	28720	0	2	0	0	25	8	1611920	0.170831	1
PELI2	315208	818	10	120080	33880	0	3	1	0	17	4	765040	0.171527	1
DDX19B	1317982	139	47	141440	36640	0	4	0	0	50	27	2635880	0.171699	1
FBXO9	450160	386	26	134400	33000	0	4	0	0	50	27	2194560	0.172092	1
CEP135	585468	376	18	339520	83240	0	8	1	0	50	21	2591520	0.17224	1
MTCH2	989876	214	28	90640	24560	0	3	0	0	50	55	2612520	0.172449	1
SPSB1	980939	281	32	75520	23600	0	4	0	0	50	43	2518120	0.172607	1
CDK6	697669	464	26	93800	26800	0	3	1	0	50	27	2380240	0.173082	1
ZRANB2	107389	955	-15	102160	26360	0	2	0	0	50	17	2593680	0.173131	1
S100A4	1454773	186	26	30600	7080	0	1	0	0	50	20	2177160	0.17346	1
CPSF6	758784	353	3	154360	48680	0	5	0	0	25	16	1183520	0.173517	1
OGFRL1	132568	459	-14	131760	33840	0	3	0	0	37	11	1609200	0.174103	1
ZDHHC18	1022828	188	30	109440	34200	0	4	0	0	50	36	2138680	0.174193	1
TMEM155	326547	440	18	37680	10920	0	1	0	0	50	36	2867720	0.174308	1
OR52E6	203856	922	-5	87240	25560	0	2	0	0	50	14	1910840	0.17438	1
C3AR1	142724	300	23	133920	40440	0	5	0	0	17	9	837440	0.174634	1
HEY1	147129	428	30	85480	27680	0	2	0	0	50	28	2516200	0.174925	1
SLC25A4	317559	530	42	85040	24040	0	3	0	0	50	19	1768680	0.175442	1
EDDM3B	956361	577	8	43960	9800	0	2	0	0	50	50	2623640	0.175624	1
GAS2	52076	981	1	92200	24440	0	2	0	0	48	18	2102840	0.175911	1
KRTAP10-5	867542	461	28	75720	22680	0	2	0	0	3	0	422440	0.175923	1
OTUD7A	155907	445	13	257480	81280	0	8	3	0	50	33	2472760	0.176194	1
SPINK2	595179	572	12	25360	6920	0	1	0	0	50	40	2265480	0.176352	1
WDR1	223391	873	42	177160	48080	0	4	1	0	50	13	1976440	0.17636	1
SH3BGRL2	205695	824	2	32480	7840	0	1	0	0	50	17	2468080	0.176759	1
APBB2	227095	394	39	220520	60280	0	3	0	0	50	10	2236640	0.176907	1
SMYD1	175471	543	6	145160	36160	0	3	0	0	50	26	2575320	0.17718	1
KCNA6	277089	903	16	144160	46640	0	4	1	0	22	8	1186360	0.177407	1
RNF114	589377	181	48	67400	17680	0	3	0	0	50	31	2126760	0.17749	1
LARP7	252277	692	39	174040	41600	0	2	0	0	50	11	2288680	0.177821	1
ADD3	349258	424	3	205960	55280	0	3	1	0	50	22	2380200	0.178064	1
STX1A	1082063	214	54	89280	19320	0	4	0	0	50	57	2784200	0.178222	1
NRGN	168652	622	14	22440	6960	0	1	0	0	50	30	2219000	0.178323	1
C7orf72	NaN	NaN	NaN	127360	34520	0	3	0	0	50	60	4489080	0.17835	1
MAPK8	107152	633	31	135360	33480	0	3	0	0	45	20	2449800	0.178408	1
DNAJC5B	270769	377	45	58880	15040	0	2	0	0	50	22	2070160	0.178443	1
TCF7L1	973960	394	18	165880	51680	0	5	2	0	50	45	2515600	0.178602	1
MTNR1B	55111	742	-18	99760	31520	0	3	0	0	21	9	1031880	0.178918	1
ZDHHC16	556333	188	42	109400	31480	0	3	0	0	50	23	2119520	0.17906	1
UNC119B	1741363	349	42	72320	20320	0	3	0	0	50	43	2115600	0.179154	1
SRF	1308754	363	35	139280	46840	0	5	0	0	25	22	1242920	0.179865	1
ATAD3B	1714469	248	27	185520	55560	0	11	0	0	11	12	586160	0.180226	1
VASH1	308800	471	39	103800	30840	0	3	0	0	25	11	1128640	0.180392	1
WDR13	817501	NaN	29	137280	41520	0	5	0	0	50	32	2335000	0.18046	1
ZNF883	519671	575	-11	109400	27160	0	2	0	0	50	16	1955480	0.180507	1
MATN3	501661	150	25	138880	40040	0	3	0	0	50	23	2425680	0.180741	1
PLAA	116221	568	-17	230920	62240	0	5	0	0	50	27	2848040	0.180815	1
FAM19A4	263741	842	-15	42040	10640	0	1	0	0	50	28	2266720	0.181109	1
UBL3	322680	335	21	35600	8800	0	1	0	0	50	22	2465760	0.181167	1
TNFRSF11B	179358	381	9	117760	28880	0	4	0	0	50	20	2247440	0.181281	1
RPL37	212186	526	19	28840	8120	0	1	0	0	50	28	2175920	0.181799	1
PSPH	749444	642	7	65480	18280	0	3	1	0	13	8	537160	0.181933	1
MATN1	286775	493	27	140560	41960	0	4	0	0	50	20	2104000	0.182179	1
MRPL15	268859	464	31	84120	24960	0	3	0	0	37	37	1832160	0.182384	1
EBNA1BP2	1068006	294	30	107600	27520	0	4	0	0	50	40	2280840	0.182411	1
KRTAP23-1	4608	1035	-69	18280	5720	0	1	0	0	50	33	1591960	0.182423	1
CCDC144NL	463169	398	-24	63960	17400	0	2	0	0	50	31	2652640	0.182506	1
ZDHHC11	843639	408	28	121280	33160	0	7	3	0	8	7	343320	0.182578	1
NR4A1	468067	234	41	164680	53840	0	7	4	0	17	6	546440	0.183251	1
KLHL36	567037	187	33	172880	51160	0	7	3	0	25	21	1197320	0.183437	1
OR9G1	NaN	NaN	NaN	84280	25640	0	2	1	0	50	61	4480200	0.183579	1
AURKC	407201	924	-63	90000	25680	0	2	0	0	50	37	2068800	0.183581	1
CLPS	621095	404	34	32760	9120	0	1	0	0	50	25	2499480	0.183807	1
RNPEPL1	837485	485	35	140840	41680	0	5	0	0	34	27	1752200	0.183899	1
AKT2	1005838	400	30	142240	37520	0	4	0	0	50	26	2024600	0.184057	1
PDCD6	935283	530	28	57320	14440	0	2	1	0	29	15	1047040	0.184126	1
PPP4C	NaN	NaN	NaN	90400	24320	0	3	1	0	50	61	4478880	0.18448	1
ZNF438	89942	603	20	235120	66320	0	4	0	0	50	18	2272480	0.184562	1
EBF2	277181	616	-1	168560	46240	0	2	0	0	50	19	2135200	0.18476	1
FMO1	427825	968	-4	153920	41800	0	4	2	0	47	23	2262240	0.185034	1
SSX5	590474	NaN	11	70120	16520	0	2	0	0	50	33	2263600	0.1851	1
UBE2N	380369	364	15	44400	12120	0	1	0	0	50	34	3039920	0.185146	1
C11orf68	3779084	287	42	79720	26840	0	4	1	0	50	32	2218200	0.185215	1
SRRM5	NaN	NaN	NaN	205840	56360	0	9	2	0	50	62	4510920	0.185833	1
TESK1	1202125	248	37	170600	59440	0	6	1	0	36	19	1719480	0.185929	1
CENPH	422005	232	38	76560	16800	0	2	0	0	50	27	2141240	0.186164	1
RAMP2	1633092	190	33	50360	14680	0	1	0	0	50	23	2288920	0.186819	1
BFSP2	342402	497	14	117680	34960	0	2	0	0	16	3	806400	0.187181	1
RHOF	826816	195	43	60560	17920	0	3	0	0	50	38	2130760	0.18724	1
OR5M1	NaN	NaN	NaN	87600	26160	0	2	0	0	50	60	4480720	0.187571	1
DEFB127	215351	430	25	28840	7640	0	1	0	0	50	16	1940840	0.188224	1
BTN2A1	384310	375	47	153000	43440	0	5	1	0	50	20	1949120	0.18823	1
SEC63	290010	481	37	229080	54480	0	3	0	0	42	7	1815120	0.188244	1
AXL	1180169	214	15	256080	75240	0	10	3	0	50	46	2431040	0.188347	1
TMEM50A	671522	270	35	47680	12080	0	2	0	0	50	36	2262640	0.18839	1
ZNF737	NaN	NaN	NaN	156280	38480	0	5	1	0	50	61	4493040	0.188521	1
FREM2	173964	1042	-10	887640	264600	0	12	1	0	19	2	1133600	0.188715	1
IL9	489402	443	19	43120	11240	0	1	0	0	50	12	1833800	0.188951	1
PSMG4	NaN	NaN	NaN	52920	15240	0	2	0	0	50	60	4469800	0.188984	1
ADORA1	469029	453	37	90600	28080	0	4	2	0	14	4	507000	0.189011	1
CC2D2A	163271	420	27	496840	128120	0	6	2	0	50	11	2271520	0.189206	1
ADCK1	427928	517	24	151040	42400	0	3	0	0	50	18	2850760	0.189672	1
FAM47B	6541	NaN	-14	178280	54520	0	9	2	0	35	16	1873880	0.18982	1
KIF5C	87934	682	0	278400	69120	0	5	0	0	36	7	1630480	0.189876	1
KLF13	204790	324	35	78760	25760	0	2	1	0	29	12	1139560	0.189945	1
ATP6AP1L	146069	476	1	64240	18680	0	2	0	0	14	4	583600	0.190241	1
ZBP1	181790	562	-4	130160	37000	0	3	0	0	50	23	2241280	0.190272	1
SLC2A3	122883	305	13	140840	42400	0	3	0	0	41	16	1802760	0.19052	1
PGAM4	549429	NaN	24	71160	20640	0	4	1	0	9	7	401160	0.190523	1
SAA1	601955	371	17	36160	9560	0	1	0	0	50	16	2398400	0.190714	1
IKBKE	504324	300	4	208440	59280	0	4	1	0	50	29	2854960	0.190844	1
PDGFB	1046938	205	60	71640	21000	0	3	0	0	50	54	2268760	0.191001	1
ART1	537999	403	23	91760	28240	0	3	0	0	50	27	2521880	0.191056	1
ORM2	206775	425	4	59880	15240	0	1	1	0	43	13	1780280	0.191171	1
TSSK6	868278	284	7	74000	24640	0	5	1	0	50	33	2152400	0.19145	1
SFTPA2	478276	NaN	11	70440	21120	0	3	0	0	50	46	2774480	0.19159	1
TDRKH	1062482	255	29	163480	45080	0	5	0	0	37	21	1639280	0.191842	1
OLFM1	199862	446	28	136280	35560	0	3	1	0	50	16	2224240	0.191866	1
TMEM128	146135	584	35	42280	10760	0	1	0	0	50	23	1989360	0.191904	1
MIER3	201203	393	41	163840	40160	0	2	0	0	50	13	2481240	0.191952	1
SNX9	255375	169	40	178960	43760	0	4	0	0	46	16	1742440	0.192009	1
ZBTB16	162787	529	-6	192360	53160	0	3	1	0	50	16	2582760	0.192256	1
PNLIPRP1	128161	704	-16	138400	35840	0	2	0	0	29	12	2162640	0.192263	1
CYTH3	NaN	NaN	NaN	120800	28960	0	3	0	0	50	60	4483520	0.192552	1
FABP2	218603	824	-1	39800	9760	0	1	0	0	50	17	2204000	0.19262	1
ZNF572	550341	596	20	156360	35400	0	5	0	0	6	1	294280	0.192781	1
CCDC80	255516	510	24	269400	76320	0	8	2	0	50	21	2381560	0.192852	1
SPACA1	176962	684	32	85520	23560	0	2	0	0	50	26	2456400	0.192973	1
GPR111	176427	691	7	182880	52440	0	3	0	0	50	24	2843440	0.193156	1
ZNF770	432995	382	2	199800	49800	0	3	0	0	34	10	1379400	0.193451	1
IGSF11	197243	714	3	126640	38360	0	2	1	0	50	21	2702080	0.193557	1
MAGEB1	74310	NaN	16	97520	28240	0	3	0	0	28	10	1128040	0.193597	1
GPR97	712945	168	34	156240	47160	0	5	0	0	33	23	1595040	0.193916	1
PCGF5	190999	410	3	78200	18160	0	2	0	0	50	21	2372760	0.19421	1
STX12	726175	202	30	83440	20120	0	3	0	0	50	25	2124640	0.194303	1
TMED8	551151	418	50	93280	26360	0	4	0	0	50	56	2744560	0.194577	1
KPRP	64902	818	18	159840	49440	0	4	0	0	41	15	1920560	0.19458	1
PAGE4	257202	NaN	7	31120	7880	0	1	0	0	50	23	2211760	0.194589	1
SSNA1	1722012	202	36	34680	9480	0	1	0	0	50	40	2547960	0.194657	1
TMEM26	84084	468	-19	104120	31120	0	2	0	0	44	20	2005840	0.194792	1
CBLN4	236365	941	-74	55720	17960	0	3	0	0	50	38	2151320	0.194941	1
ERICH1	106263	889	-34	129000	33480	0	5	1	0	50	26	1838080	0.194967	1
ZNF689	2255010	158	60	138520	42800	0	5	0	0	50	52	2603480	0.195353	1
BTF3L4	658095	315	18	47640	12000	0	1	0	0	50	24	2541640	0.196448	1
ARMC6	1327004	215	24	133960	41120	0	4	1	0	50	34	2490440	0.196491	1
ZMYND11	223637	625	3	183680	42400	0	4	1	0	50	22	2455800	0.19677	1
USP17L2	475312	625	3	149240	41920	0	3	2	0	50	29	2336320	0.196891	1
ARPC4	953772	264	43	50680	12560	0	3	1	0	32	38	1902000	0.197429	1
FAM109B	1321127	363	65	71560	22520	0	2	1	0	50	25	1767240	0.197654	1
ZBTB8A	1429703	230	21	127040	33400	0	3	0	0	50	34	2372960	0.19797	1
PGPEP1L	217299	248	-20	55640	17200	0	2	1	0	21	12	912680	0.198129	1
BLZF1	286300	491	7	115880	31840	0	3	0	0	50	16	2390000	0.198257	1
KLHDC4	594175	251	28	151520	41440	0	5	1	0	17	15	881360	0.198394	1
TUBA3D	455705	540	29	127040	37480	0	6	0	0	20	10	768120	0.198901	1
SND1	566402	650	22	263760	75240	0	7	2	0	50	31	2164680	0.198947	1
SULT1C4	361799	483	-2	91200	20760	0	1	0	0	50	19	2602360	0.199371	1
RFC4	449980	384	25	106880	29440	0	4	1	0	50	28	2247520	0.199493	1
LEP	925335	373	30	47440	14000	0	1	0	0	50	33	2195640	0.199496	1
SNX32	3779084	287	42	118040	33160	0	4	2	0	14	7	527120	0.199736	1
PRKAG2	600611	437	20	165880	46520	0	2	0	0	33	5	1364480	0.199818	1
GJA1	60722	773	-23	107840	30520	0	4	0	0	15	10	628600	0.199978	1
SURF2	1827885	416	28	75120	20280	0	2	0	0	50	30	1926440	0.200014	1
GEM	518471	543	24	85520	23320	0	2	0	0	50	12	1780240	0.200213	1
PRRT1	2119974	392	28	81840	30120	0	2	0	0	18	9	853160	0.200442	1
DYDC1	352963	598	18	54840	12360	0	1	0	0	50	21	2909440	0.200795	1
CPLX4	293564	549	20	48480	10440	0	1	0	0	50	34	2989800	0.200887	1
BAAT	112947	898	-22	117080	35200	0	2	0	0	50	22	2424480	0.201258	1
KAT5	4131934	202	53	157240	45440	0	7	0	0	50	34	2329840	0.2014	1
KLRK1	378365	334	0	67240	14240	0	2	0	0	50	32	2438360	0.20164	1
UPB1	546252	171	51	112320	30600	0	4	0	0	50	36	2072720	0.201694	1
VCX	43100	NaN	-9	59160	15840	0	5	2	0	8	7	332000	0.201992	1
CCDC96	459652	426	70	155080	45320	0	5	0	0	21	6	787000	0.202356	1
LDLRAP1	562107	424	19	90120	24960	0	2	0	0	50	13	2340680	0.202584	1
CSN2	9753	991	-4	65440	19400	0	1	0	0	50	17	2098080	0.20271	1
ZNF385B	65074	927	-3	137920	39080	0	3	0	0	50	17	2459600	0.20286	1
TSPAN4	1799017	232	51	69080	20320	0	2	0	0	50	26	2108280	0.202917	1
MTPAP	91344	331	12	168000	45960	0	3	0	0	50	18	2387280	0.203075	1
TTC27	358024	636	17	248360	64600	0	5	0	0	29	11	1568600	0.203281	1
SPINK13	72574	418	-9	29600	6520	0	1	0	0	50	37	2445920	0.203537	1
BPNT1	638729	613	-6	89720	25360	0	2	0	0	50	25	2456680	0.203583	1
HIST1H2BO	228884	634	40	35400	10800	0	1	0	0	50	15	1663400	0.203603	1
STAP2	2122615	220	27	130840	37400	0	4	1	0	50	56	2680600	0.204001	1
B3GAT2	178636	733	7	89280	29040	0	2	0	0	50	21	2711800	0.204451	1
PTK2	466681	356	35	319960	81920	0	7	1	0	35	13	1385120	0.204479	1
ARF3	1737773	214	55	53080	14360	0	1	0	0	50	15	2086840	0.204642	1
LY6D	427585	373	34	36280	11360	0	1	0	0	50	18	1974520	0.204735	1
2021-03-05	429135	317	31	80680	22160	0	2	0	0	17	2	505480	0.204745	1
VAMP5	1158965	170	43	33360	9960	0	2	0	0	50	43	2209320	0.205146	1
HIST1H2BA	272695	635	29	35720	10600	0	1	0	0	50	18	1939800	0.205149	1
FER	140251	741	20	246720	58440	0	5	0	0	28	8	1409160	0.205397	1
NRN1L	879834	158	50	45440	15520	0	2	0	0	50	36	2670200	0.205694	1
SNURF	233460	1194	-44	21680	5920	0	1	0	0	50	26	2634480	0.205785	1
BCL11A	151287	732	7	247360	67520	0	7	1	0	50	27	2739200	0.205788	1
RBM4	1432488	187	46	102040	30800	0	8	2	0	9	9	615560	0.205897	1
CELA1	504747	239	33	75200	21640	0	3	1	0	12	4	492320	0.206488	1
PSMB11	1261207	185	41	81240	27360	0	3	0	0	50	24	2423920	0.206691	1
TMEM74	275834	891	-14	85200	25440	0	3	0	0	50	22	2055760	0.206785	1
ANP32B	466644	269	42	76400	17200	0	2	0	0	50	29	2217920	0.206977	1
PNOC	311812	229	35	51440	13720	0	3	1	0	11	6	290280	0.207841	1
EHD2	812020	262	36	152440	45800	0	11	2	0	3	2	165440	0.207861	1
RIMS4	942798	168	40	76640	22960	0	2	1	0	50	37	2662160	0.207925	1
PRDM1	162338	278	44	235280	66280	0	10	4	0	16	12	797680	0.207976	1
TRAT1	107009	961	-15	56600	13120	0	1	0	0	50	18	2540760	0.208083	1
COX10	96214	985	-54	124120	38600	0	5	2	0	27	15	1028400	0.208162	1
FAM131B	379715	379	29	103920	28920	0	3	0	0	50	27	2487240	0.208511	1
OSBPL2	990360	252	9	143600	35320	0	5	2	0	50	29	2008440	0.208689	1
TNFSF4	293612	492	-1	52800	14400	0	1	0	0	50	27	2825800	0.209029	1
POU4F1	41876	1004	-1	113120	38560	0	3	0	0	13	2	544360	0.209203	1
BCKDHA	1104034	376	38	128800	35840	0	6	3	0	27	18	950480	0.209305	1
DEFB110	70183	1258	-7	34640	6640	0	1	0	0	50	22	2188840	0.209318	1
CABP4	1392213	215	53	77960	24040	0	3	0	0	50	34	1736560	0.209638	1
CCDC12	489602	371	43	53640	14280	0	1	0	0	50	23	2200520	0.209655	1
FBXO46	929036	203	43	162640	55280	0	6	3	0	50	42	2540840	0.209779	1
HEBP2	421773	590	19	60160	15440	0	1	0	0	50	22	2437320	0.209796	1
UFSP2	173409	422	20	138040	36440	0	4	0	0	50	22	2157360	0.210354	1
IRX3	99177	509	-42	135320	46840	0	3	0	0	11	5	715280	0.210703	1
RBPJ	178487	597	36	152440	40280	0	2	0	0	50	16	2110200	0.210918	1
TMEM220	59041	801	-49	46960	13400	0	1	0	0	50	21	2821440	0.211228	1
DNAJC22	2137968	175	37	93800	29800	0	3	0	0	27	22	1474120	0.211232	1
CTLA4	148748	632	18	65400	16680	0	2	1	0	15	5	526840	0.211367	1
TF	489558	523	26	205680	53640	0	3	1	0	50	16	2127160	0.211371	1
RAD9A	1269888	177	51	112480	33680	0	3	0	0	50	25	2325720	0.211976	1
DHRS7B	409501	382	-18	92000	28480	0	2	0	0	50	28	2509920	0.212164	1
HS3ST5	217498	675	-8	97960	27680	0	2	0	0	50	39	3627960	0.212201	1
TREML4	249047	607	38	58160	16600	0	1	0	0	50	10	1892080	0.212353	1
GRM1	92600	941	-13	340760	100840	0	6	2	0	50	18	2731720	0.212736	1
GRIK3	361850	626	30	263720	74680	0	4	0	0	34	11	1986320	0.212982	1
TREM1	270628	607	34	66520	19760	0	2	0	0	50	17	1687320	0.213004	1
HOXD12	242935	874	15	73520	24520	0	2	1	0	29	7	1007880	0.21327	1
DARC	99569	785	14	92760	32520	0	2	0	0	50	21	2075560	0.213451	1
GPR19	791330	136	44	117040	33200	0	2	0	0	50	25	2282160	0.213495	1
LMAN2	942017	227	53	103000	28880	0	4	2	0	42	41	1716120	0.21412	1
GPR39	46530	849	3	125840	38080	0	6	1	0	19	10	929120	0.214351	1
SYK	126037	542	32	186080	49120	0	4	0	0	50	23	2738000	0.214512	1
CBLL1	513169	515	28	139800	39720	0	4	0	0	38	12	1655840	0.215647	1
NEURL1B	NaN	NaN	NaN	149280	52800	0	6	2	0	50	62	4507360	0.215708	1
GCG	95439	554	7	54520	13040	0	1	0	0	50	14	2271240	0.21591	1
NR5A2	120174	616	-8	156760	41720	0	3	1	0	50	18	2227040	0.216079	1
FAM166A	1724821	399	43	92880	24720	0	4	0	0	50	44	1869280	0.216952	1
GFPT1	481090	144	17	202200	51960	0	4	0	0	43	11	2042680	0.217041	1
SDS	444479	276	36	93160	28640	0	2	1	0	13	2	553560	0.217045	1
PNPLA8	366326	803	-6	226640	59560	0	4	0	0	32	13	1614240	0.217372	1
C9orf66	219110	462	-10	77960	28600	0	2	1	0	50	29	2134640	0.217951	1
C4orf48	NaN	NaN	NaN	35400	12960	0	1	0	0	50	60	4467520	0.218338	1
SLC1A2	643540	263	15	163280	48520	0	2	0	0	50	19	2388320	0.218355	1
FOXJ2	139049	167	22	165200	46600	0	3	0	0	19	8	1010320	0.218429	1
KRT13	1445853	325	-22	130520	38320	0	4	0	0	28	13	1070520	0.218754	1
RAB12	241286	451	11	71400	19200	0	2	0	0	42	31	2123960	0.219075	1
TIGIT	369332	614	19	69280	20600	0	2	0	0	50	25	2283760	0.21908	1
SHROOM3	570950	418	17	550840	172880	0	8	4	0	50	14	2259360	0.21915	1
MRPL1	159162	508	15	97200	24000	0	3	0	0	50	24	2329440	0.219151	1
SLC16A2	357915	NaN	14	171160	52280	0	2	0	0	50	20	2619040	0.219507	1
KLHL29	NaN	NaN	NaN	227040	70320	0	6	2	0	50	62	4524880	0.21978	1
ENOSF1	418492	425	32	148160	36400	0	3	0	0	50	23	2190840	0.219927	1
CRX	881316	336	39	82760	26680	0	3	1	0	50	41	2528640	0.219953	1
DACH2	49531	NaN	-32	173840	48760	0	2	0	0	33	11	1687080	0.219982	1
FBLN7	NaN	NaN	NaN	124880	36880	0	4	1	0	50	61	4491440	0.220026	1
ZNF630	582390	NaN	18	191400	46920	0	3	0	0	42	30	2236200	0.220087	1
NUFIP2	1348501	128	32	198080	54160	0	4	0	0	50	39	2649880	0.220129	1
C17orf97	248876	591	1	27240	9720	0	1	0	0	50	22	2035560	0.220266	1
G6PD	2163759	NaN	42	158560	43760	0	4	2	0	38	27	1942560	0.220387	1
APOBEC4	NaN	NaN	NaN	104560	28400	0	2	0	0	50	60	4482960	0.220408	1
ZC3H12B	321325	NaN	10	238480	65000	0	4	0	0	40	18	2031000	0.22092	1
OR10A6	105341	679	6	87160	26120	0	2	0	0	40	13	2407520	0.221258	1
COL4A3BP	253484	500	37	220040	60160	0	3	1	0	24	3	1071680	0.22151	1
ZBTB44	658636	276	18	130000	35840	0	3	1	0	50	25	2230160	0.221776	1
PURB	1107527	219	54	85640	27280	0	3	0	0	50	56	2921800	0.221786	1
SLC2A7	840956	264	31	143840	46120	0	4	0	0	50	36	2308040	0.222099	1
HNMT	82611	496	-3	107280	26280	0	2	1	0	48	24	2555880	0.222208	1
SIM1	103376	626	0	219480	61440	0	3	1	0	47	16	2372240	0.222522	1
ENTPD6	605543	305	-18	141800	40120	0	4	1	0	50	43	2532880	0.222744	1
ST8SIA5	292667	608	15	109040	29560	0	3	1	0	11	3	628560	0.222985	1
RNF146	113326	889	-6	99400	30200	0	3	0	0	50	38	2458280	0.223052	1
PELI1	379419	441	35	120520	33200	0	3	1	0	34	18	1445840	0.223054	1
TMC1	395593	486	10	228240	55320	0	4	1	0	50	27	2238000	0.223104	1
ZNF699	401242	705	-65	188320	45080	0	4	0	0	29	16	1294600	0.223221	1
TIA1	667934	164	33	116560	28520	0	3	0	0	33	23	1629680	0.223454	1
SIPA1L2	94875	598	-14	490480	139400	0	9	1	0	32	13	1924360	0.223573	1
IL13RA2	166070	NaN	19	114000	27480	0	2	0	0	50	15	1755360	0.223957	1
ZFP1	647304	162	19	120000	28320	0	3	0	0	50	41	2559520	0.223972	1
SAMD4A	653012	376	38	215400	61920	0	5	2	0	50	27	2836320	0.224115	1
ANKRD36	NaN	NaN	NaN	593520	141600	0	13	4	0	50	64	4596160	0.224249	1
GPR157	890298	264	31	90440	32200	0	2	0	0	50	20	2082680	0.22439	1
CAV1	554882	159	0	52120	13520	0	2	0	0	50	39	1977480	0.224476	1
TADA2B	459652	426	70	118320	33720	0	4	2	0	17	5	608600	0.224493	1
EFR3A	99296	999	6	242760	63720	0	5	1	0	32	14	1666160	0.224545	1
DENND5B	300830	361	17	369720	98880	0	5	2	0	50	24	2709640	0.224826	1
YIPF4	396035	325	23	69920	20680	0	1	0	0	50	16	2625360	0.224983	1
ANKH	503265	410	8	141480	41280	0	3	1	0	17	10	1409120	0.225004	1
SLC24A4	368522	642	27	177000	49080	0	2	1	0	38	9	2226600	0.2251	1
SPDYE4	NaN	NaN	NaN	70160	18160	0	2	0	0	50	60	4472720	0.225278	1
EMX2	130702	632	4	72680	19360	0	1	0	0	50	16	2012640	0.226063	1
P4HA1	539936	354	44	165840	42480	0	3	0	0	50	24	2215880	0.227054	1
DOK5	139298	847	-37	90520	23360	0	2	0	0	50	24	2256080	0.227061	1
OR9G4	384896	828	-34	90320	27640	0	2	0	0	50	26	2143400	0.227259	1
EDNRB	63780	954	31	138320	38800	0	3	0	0	12	3	599720	0.227413	1
SNX21	742720	180	48	108400	34640	0	5	1	0	50	25	1730840	0.227445	1
B3GALNT2	536528	350	16	146080	39560	0	4	1	0	50	22	2357680	0.227787	1
AHSG	508316	436	45	103480	32120	0	3	0	0	50	44	3143400	0.227976	1
FABP4	191177	595	1	39680	9880	0	1	0	0	50	27	2295240	0.228362	1
NOP14	680459	336	49	252160	65600	0	6	0	0	39	15	1696440	0.228472	1
S100Z	246938	418	21	30280	7160	0	1	0	0	50	30	2293280	0.228531	1
NAAA	483325	429	44	104480	30760	0	2	0	0	50	29	2711000	0.228727	1
UGT1A8	320853	284	24	150880	42440	0	3	0	0	15	5	867160	0.229149	1
IMMP1L	124843	916	-4	49720	13040	0	1	0	0	50	15	2050080	0.229555	1
AGTR2	224760	NaN	7	102400	29120	0	2	0	0	18	10	941960	0.229712	1
HOXA9	473864	394	13	75840	23160	0	2	0	0	50	44	2879120	0.23003	1
DCUN1D4	70055	766	17	90600	19680	0	2	0	0	50	21	2213400	0.230113	1
MAL2	247332	442	-1	49560	15960	0	1	0	0	50	22	2376000	0.230238	1
MON1A	1289886	170	38	179520	57960	0	5	2	0	50	29	2404680	0.230336	1
GCHFR	1011507	172	46	24880	6920	0	1	0	0	50	43	2601640	0.230358	1
RNF139	472766	476	28	186200	53680	0	9	1	0	33	43	1855320	0.23037	1
WTAP	643775	604	19	116480	30040	0	3	0	0	21	8	965280	0.230475	1
ANKRD10	506421	402	22	119760	34200	0	2	0	0	50	22	2630920	0.231143	1
CD47	288227	650	5	96320	25600	0	2	1	0	50	23	2439520	0.231363	1
MRPS18A	1626879	278	43	56680	16880	0	3	0	0	50	62	2756400	0.231659	1
SLC15A1	334185	409	41	211120	54920	0	3	2	0	31	15	1762880	0.232205	1
PJA1	136194	NaN	39	181000	50840	0	8	1	0	50	34	2118560	0.232728	1
FRRS1	276548	540	-5	184640	48040	0	3	1	0	50	16	2239240	0.232732	1
CD82	211161	551	20	79280	21040	0	4	1	0	29	21	1114320	0.232751	1
PCBD1	327428	592	29	31200	8040	0	1	0	0	50	20	2590160	0.232769	1
ZNF273	217076	1017	-15	165400	41480	0	6	2	0	16	5	484000	0.233178	1
ZFPL1	3267059	207	46	87520	27800	0	3	0	0	50	35	2301440	0.233387	1
MRGPRX4	631291	436	20	87720	28800	0	2	1	0	50	33	2787320	0.233502	1
HNRNPH3	615189	250	20	102680	26560	0	3	0	0	50	28	2191520	0.233578	1
RHBDF1	1005761	238	36	244520	71800	0	5	2	0	50	29	1867880	0.233604	1
STEAP1	128669	1182	-10	98560	26000	0	1	0	0	50	17	2914520	0.233877	1
RAB10	591333	135	44	60040	14720	0	1	0	0	50	13	2157720	0.233885	1
USP28	169458	534	10	316880	82960	0	5	1	0	50	20	2872440	0.234008	1
SIRT5	277510	425	37	93600	27600	0	2	0	0	44	17	2004080	0.234046	1
AFM	331900	594	3	180360	42600	0	3	0	0	25	10	1349400	0.23407	1
SERPINA6	203903	744	-1	115440	32640	0	2	0	0	50	21	2254160	0.234102	1
HIST1H4D	398813	636	53	28040	9640	0	1	0	0	50	30	1532360	0.234383	1
FAM160B2	584373	219	34	193680	57960	0	6	1	0	50	41	2396640	0.2344	1
RHOBTB1	99491	403	-13	201320	53920	0	3	0	0	50	19	2607080	0.234526	1
ATP9A	171625	419	0	304400	85840	0	8	1	0	50	22	2533160	0.234584	1
S1PR1	190734	597	4	105000	32880	0	3	0	0	50	29	2008200	0.235188	1
MLST8	2179404	224	39	96080	25480	0	5	1	0	50	30	2194080	0.23519	1
ATP6V1A	442365	364	33	180280	48920	0	3	0	0	37	7	1440320	0.235407	1
TRIM16	471003	431	-19	162040	43760	0	4	2	0	36	18	1452120	0.23554	1
PCSK1	525524	288	24	223360	59480	0	3	1	0	50	13	1870960	0.235704	1
RANBP9	277023	378	29	209400	59880	0	5	2	0	50	21	2585880	0.235969	1
SCGB1D2	3058870	450	42	26680	7280	0	1	0	0	50	28	1832040	0.236122	1
LAD1	857879	209	26	146080	44720	0	4	0	0	35	16	1167840	0.236284	1
PALM2	276166	485	4	120640	32000	0	2	0	0	50	21	2747960	0.236457	1
C3orf36	548078	520	28	43760	16000	0	1	0	0	34	26	1836200	0.236492	1
TREX2	971101	NaN	7	63360	22320	0	2	1	0	38	20	1228560	0.236654	1
RASL10B	675201	196	3	57120	17280	0	3	1	0	30	24	1453720	0.23728	1
N4BP1	156698	392	1	254600	71200	0	5	0	0	28	22	1883320	0.237356	1
RPRD1A	370331	430	22	91440	24360	0	2	0	0	50	28	2892400	0.237425	1
ZNF460	419642	859	-40	161200	42440	0	8	3	0	20	11	799000	0.238148	1
TMCO1	321853	406	-2	55840	15080	0	1	0	0	50	22	2289000	0.238176	1
EFEMP2	3779084	287	42	129760	34880	0	4	0	0	50	32	2218200	0.23831	1
NAT8	876583	590	16	62960	19600	0	2	0	0	50	50	2989560	0.238454	1
HINT2	847663	227	54	46320	15120	0	2	0	0	50	53	2320720	0.238591	1
AMPD3	777397	378	27	227920	61160	0	4	1	0	50	36	2941720	0.238724	1
ZMAT1	262044	NaN	16	188320	44360	0	4	0	0	50	27	2599720	0.2389	1
CRYGA	321897	440	5	50960	13480	0	1	0	0	50	14	1897680	0.239167	1
ZSWIM4	754888	241	31	274640	87520	0	10	4	0	38	29	1666560	0.239281	1
UQCRFS1	158775	892	-73	75200	24280	0	2	0	0	50	38	2366880	0.239319	1
BTN3A2	378286	330	51	97080	27360	0	3	0	0	50	25	2374480	0.239946	1
ZAP70	358719	582	36	179400	49560	0	7	3	0	19	6	784200	0.240028	1
IGFL4	997099	261	31	37200	9480	0	1	0	0	50	34	2513160	0.240076	1
FBL	1289328	526	23	91920	28080	0	4	0	0	50	42	2386640	0.240199	1
UNC50	260302	696	39	75280	20720	0	1	0	0	50	9	2399840	0.240485	1
ZCCHC24	334525	284	46	69200	19360	0	2	1	0	18	10	809160	0.240515	1
RBM3	817501	NaN	29	47080	12680	0	1	0	0	50	32	2335000	0.240905	1
OR10K2	135429	902	5	85440	27000	0	2	0	0	14	4	568800	0.241233	1
OTOR	76240	856	-21	38480	9640	0	1	0	0	50	31	2378720	0.241292	1
PGAM5	724450	495	35	85960	27200	0	3	0	0	50	35	2810360	0.241455	1
JPH2	526607	344	21	191880	63000	0	5	1	0	50	31	2541520	0.241475	1
DPYSL2	207566	520	26	165560	46960	0	3	2	0	35	8	1420080	0.241734	1
TLR3	355117	414	-13	258000	69720	0	5	1	0	50	30	2362480	0.242021	1
BCKDK	1296884	351	35	118120	35600	0	4	2	0	50	42	2518760	0.242225	1
CPA3	306125	544	-14	124520	31000	0	3	0	0	50	32	2444240	0.242437	1
GAL3ST4	1299015	205	52	132000	44280	0	4	0	0	50	34	2341800	0.24245	1
FAM198B	123627	849	-14	154920	46320	0	3	0	0	50	32	3255600	0.24271	1
TMC3	245396	787	28	319560	86880	0	7	4	0	39	18	1785560	0.242775	1
ADAP1	737267	310	41	110640	29160	0	4	0	0	50	42	2421240	0.242863	1
SELK	128709	552	39	28800	7320	0	1	0	0	50	28	1917080	0.242917	1
IRS2	217826	438	4	356920	125600	0	5	1	0	50	18	2382280	0.24328	1
SLC7A5	604095	133	34	141600	45840	0	2	0	0	24	5	1157840	0.243318	1
SCML1	70191	NaN	15	96160	25880	0	2	0	0	50	29	2542400	0.243369	1
PIWIL3	399624	395	-4	258840	68640	0	4	0	0	26	5	1128920	0.243744	1
SP5	318434	709	28	107040	37080	0	2	0	0	50	23	2442720	0.243895	1
IMPG1	187724	674	-13	233520	61440	0	2	0	0	42	23	2746280	0.243941	1
CRYGN	612907	196	36	54320	13480	0	3	1	0	8	6	375920	0.244113	1
TARM1	NaN	NaN	NaN	76760	23560	0	2	0	0	50	60	4478120	0.244311	1
LRP5	830388	241	53	458320	134240	0	22	7	0	38	20	1477160	0.244348	1
TDP2	419582	373	8	106200	27600	0	3	0	0	50	32	3004960	0.244606	1
TMEM19	259684	393	-11	95600	28120	0	2	0	0	50	20	2269520	0.244927	1
USP20	552898	184	42	267520	73400	0	9	2	0	50	22	2029200	0.245119	1
PRR5L	196876	169	-1	105840	30840	0	2	0	0	36	13	1606240	0.245129	1
ZNF8	1546372	406	-39	164000	44800	0	3	1	0	36	18	1484760	0.245905	1
SOBP	288292	592	36	241640	75880	0	6	2	0	18	5	714080	0.246417	1
TULP4	669285	403	41	430200	131880	0	10	1	0	22	9	1546880	0.246611	1
TMEM31	485629	NaN	43	57680	13240	0	2	0	0	50	31	2063720	0.246797	1
MECOM	215619	985	-10	363280	92240	0	5	1	0	50	18	2597480	0.246914	1
TMOD4	1562281	184	33	102880	26240	0	3	0	0	50	29	2355520	0.246988	1
DNAJC28	884788	182	63	113000	27520	0	5	0	0	22	17	864960	0.247123	1
CTNNB1	305811	448	8	223840	64880	0	3	0	0	41	8	1838440	0.247219	1
MON1B	60048	1058	-19	148960	50720	0	5	0	0	29	15	1335040	0.247411	1
KCNJ1	194422	602	1	111000	30840	0	2	0	0	50	21	2279160	0.24769	1
DDIT3	1347795	303	44	48280	13880	0	2	0	0	50	72	3327560	0.248059	1
CRYAA	687433	279	59	48920	14920	0	2	0	0	50	41	2135200	0.248096	1
RBMXL1	316278	598	5	106960	33800	0	4	2	0	13	7	572480	0.248113	1
SPATA9	305999	216	35	73840	19880	0	2	0	0	50	31	1932320	0.248193	1
ATP6V0D1	1099149	153	45	102920	27400	0	3	0	0	13	8	693400	0.248586	1
PRPS2	208595	NaN	46	92560	26240	0	2	1	0	28	16	1452000	0.24864	1
ZMYM3	728738	NaN	25	395800	111440	0	6	0	0	22	17	1550880	0.248835	1
CETN1	483873	521	28	49760	12760	0	1	0	0	38	13	1577120	0.249162	1
SGCB	114535	815	8	93360	24120	0	2	0	0	50	21	2504360	0.249221	1
ASGR1	1682013	348	15	86680	22280	0	3	0	0	18	7	735120	0.249307	1
PRKRIR	234429	366	57	218400	57840	0	4	0	0	34	11	1223120	0.249307	1
CRADD	375586	385	13	55920	17040	0	1	0	0	50	33	2760240	0.249642	1
OR51L1	97256	1024	-11	86200	27320	0	1	0	0	50	18	2845480	0.249657	1
RRN3	564013	463	22	193360	49760	0	3	0	0	40	13	1792360	0.250008	1
CSGALNACT1	171847	356	17	153960	40800	0	4	1	0	50	27	2118280	0.250075	1
RAB8A	761374	298	42	62720	15520	0	2	1	0	12	3	350800	0.250144	1
TIMM44	960059	320	23	133120	35720	0	8	1	0	50	45	2182080	0.250196	1
SGK1	97901	129	15	190120	49520	0	3	1	0	50	23	2100240	0.251303	1
U2AF1L4	1151198	321	30	70080	12840	0	2	0	0	28	14	1310880	0.251388	1
TYROBP	1060028	321	47	32880	10320	0	1	0	0	50	29	2168280	0.252145	1
PPBP	230379	408	2	37000	10640	0	1	0	0	50	25	2659640	0.252268	1
CDCA7	255854	559	28	132080	34600	0	3	1	0	50	33	2431200	0.252373	1
PCDP1	309897	441	17	166120	41360	0	2	0	0	50	20	2537640	0.252649	1
C3orf67	146530	837	19	166120	42680	0	2	0	0	17	3	955480	0.253055	1
NLRC4	394223	276	21	294360	78360	0	5	1	0	50	19	2677360	0.253147	1
FBXO11	486669	587	27	283720	71480	0	5	0	0	20	5	1129080	0.253212	1
UBASH3B	660955	261	6	188680	51560	0	5	0	0	50	43	3258040	0.253242	1
OR4K13	383274	768	-37	84120	25440	0	2	0	0	20	13	911360	0.253591	1
PC	1649909	187	38	332240	101560	0	12	5	0	50	36	2350080	0.253621	1
GABRG1	36353	926	-2	136240	35360	0	4	0	0	5	1	297320	0.253865	1
SLC41A1	717622	377	37	143720	45640	0	4	1	0	50	30	2829040	0.253885	1
DCT	123751	906	0	160160	43240	0	4	0	0	40	13	1655600	0.253901	1
OR2T33	18846	936	-35	88440	27000	0	2	1	0	22	10	787400	0.253921	1
MAT1A	365795	598	44	113840	32560	0	4	2	0	38	30	1625480	0.254305	1
SMCP	59999	804	12	34960	7640	0	1	0	0	50	31	2422360	0.254675	1
C11orf70	420989	358	-16	68000	17200	0	1	0	0	50	23	2396040	0.254693	1
ZNF92	300914	894	18	172640	40120	0	3	0	0	47	19	2316240	0.254786	1
OTUB1	1322584	277	42	80360	20440	0	3	0	0	50	47	3010680	0.254814	1
BTBD8	220071	406	-6	112680	27840	0	3	0	0	50	29	2351480	0.25487	1
AP2M1	1456939	257	45	131840	30040	0	5	0	0	50	52	2401960	0.255158	1
FAM81B	316501	511	4	135440	32200	0	2	1	0	50	18	2377120	0.255398	1
PTP4A3	170603	382	51	50360	14200	0	1	0	0	50	14	2138720	0.256086	1
FAM26E	261450	479	19	87880	24440	0	2	0	0	50	35	2621360	0.256103	1
AP3M2	580110	382	45	121320	33360	0	3	0	0	50	40	2394160	0.256283	1
AMFR	498079	442	-9	185000	53080	0	4	1	0	50	33	2650880	0.256318	1
CD46	321738	372	8	127680	29520	0	2	0	0	50	13	2244840	0.256436	1
C9orf135	243260	478	-8	68520	17160	0	1	0	0	50	22	2194840	0.256596	1
COG6	73269	761	11	195720	52920	0	3	0	0	50	20	2599120	0.256803	1
BVES	108905	702	-1	106200	27120	0	2	0	0	50	12	2459680	0.257036	1
GGTLC1	159782	930	-48	64720	19040	0	2	0	0	50	25	1936760	0.25713	1
IFIT5	253827	213	17	137960	36400	0	2	0	0	47	22	1698480	0.257414	1
COMMD1	563800	420	26	54560	15400	0	1	0	0	50	25	2601840	0.257519	1
ZBTB48	628180	259	38	197840	55240	0	3	1	0	50	23	2533120	0.257808	1
PLA2G3	731144	218	40	143720	42760	0	2	0	0	50	30	2822760	0.257847	1
CXCR1	718028	301	27	96320	30520	0	2	0	0	50	39	3019440	0.258024	1
RGP1	922448	190	48	121320	38400	0	3	0	0	36	15	1676840	0.258033	1
FAM24B	290558	619	14	27480	7680	0	1	0	0	18	19	812400	0.25827	1
SYTL5	106836	NaN	19	220800	57960	0	3	0	0	50	23	2495200	0.258342	1
WDR33	605495	187	43	421160	119080	0	10	0	0	6	0	351080	0.258396	1
ZNF765	374515	876	-62	153960	36120	0	6	2	0	50	30	1970000	0.258506	1
CDK16	819569	NaN	38	166200	48720	0	4	0	0	50	25	1862520	0.258527	1
HSDL2	458381	341	17	124760	31120	0	3	1	0	50	29	2188520	0.25853	1
PLA2G4F	655295	394	36	243400	71960	0	3	0	0	50	17	2444960	0.258667	1
PSMA8	168448	577	57	75560	19840	0	2	0	0	40	18	1705840	0.258679	1
HAX1	1653296	236	29	81680	22000	0	4	1	0	50	55	2580080	0.258794	1
TRAPPC9	327071	689	16	356240	103480	0	7	2	0	29	5	1564840	0.258845	1
C1orf116	451418	155	25	164800	53360	0	3	0	0	41	21	2215480	0.259266	1
P4HA2	371617	246	35	163280	44080	0	4	1	0	50	23	2116520	0.259375	1
VPREB1	433352	612	35	41640	11640	0	1	0	0	50	27	2493320	0.259583	1
OR7A17	963401	546	14	84920	26440	0	3	2	0	37	33	1454000	0.259869	1
SLC35F2	392825	538	12	107440	30920	0	2	1	0	46	28	1869520	0.260352	1
TMEM38A	980514	362	41	85920	24720	0	2	1	0	50	42	2436640	0.260624	1
ARV1	376655	616	12	80240	20320	0	2	0	0	50	36	2296240	0.260728	1
RCC1	NaN	NaN	NaN	129920	37960	0	3	0	0	50	60	4492520	0.261099	1
RNF165	452638	289	33	99920	28600	0	3	1	0	22	9	852600	0.26168	1
ABHD13	71759	952	-32	95240	26920	0	2	0	0	50	24	2040640	0.261988	1
DOCK8	193637	462	2	633400	169400	0	8	3	0	50	17	2597960	0.262454	1
C2CD4C	NaN	NaN	NaN	112600	39800	0	2	0	0	50	60	4494360	0.262515	1
GDI1	2277674	NaN	40	131600	34480	0	4	1	0	50	37	2311280	0.262818	1
SAE1	1351246	165	36	112240	25400	0	4	1	0	50	46	3009160	0.263071	1
CASP5	45234	626	-20	132160	33680	0	5	0	0	16	6	522360	0.263333	1
WSCD1	283312	593	-11	161520	49200	0	2	0	0	41	11	1740800	0.263401	1
AKR1B15	403585	319	21	103000	26000	0	1	0	0	50	16	2593760	0.263404	1
MAEA	938287	391	37	115560	31440	0	5	0	0	44	26	1856960	0.263428	1
RNH1	2088403	221	50	130600	40520	0	4	1	0	50	39	2386760	0.263444	1
SERPINA5	316239	858	10	115880	32560	0	2	1	0	24	9	1021200	0.26356	1
SCYL1	3988328	197	46	232520	67120	0	6	2	0	50	34	2329840	0.263848	1
DNPEP	604261	335	38	140520	41160	0	3	2	0	30	17	1381880	0.263901	1
THAP1	594393	454	34	64560	13440	0	1	0	0	50	32	2861000	0.264057	1
LHPP	305373	430	22	77560	23120	0	2	0	0	50	37	2374800	0.264579	1
OR8K1	10293	963	-36	89040	25920	0	1	0	0	50	18	2772640	0.264614	1
GPNMB	505224	169	25	165720	45360	0	3	1	0	50	24	2502400	0.264982	1
LRP10	1177534	225	34	193640	66280	0	8	3	0	39	40	1458720	0.26519	1
MLLT11	1614665	165	40	26160	7080	0	1	0	0	50	25	2288760	0.2655	1
NDUFB11	819569	NaN	38	46920	13560	0	1	0	0	50	25	1862520	0.265682	1
HHEX	359162	317	17	76480	22760	0	1	0	0	50	27	2771160	0.265859	1
PSMA1	366243	381	-3	85920	22200	0	1	0	0	50	18	2357120	0.266567	1
CA8	206353	885	-14	85800	22800	0	2	0	0	50	28	2605720	0.266796	1
KRT32	1445853	325	-22	127920	36840	0	3	1	0	28	13	1070520	0.26686	1
FNIP1	346839	637	27	340400	87880	0	3	0	0	50	14	2742320	0.267142	1
LIM2	368509	610	-9	61720	17960	0	1	0	0	50	18	1609160	0.267163	1
SEL1L2	116952	820	-29	207280	50360	0	5	0	0	8	2	447560	0.267298	1
RSL1D1	558203	294	37	142080	38760	0	3	0	0	15	5	740360	0.267395	1
CCDC120	833689	NaN	41	180680	64360	0	5	0	0	37	25	2024000	0.267444	1
PRCC	1649536	208	53	137280	42720	0	3	1	0	50	31	2440040	0.267515	1
TSSK2	487560	277	18	100280	28960	0	11	3	0	5	10	314920	0.268024	1
PRSS16	161388	645	24	143960	46960	0	2	0	0	21	6	1114280	0.268074	1
TCEA3	1050778	163	27	103640	26800	0	3	0	0	50	41	2338560	0.268133	1
MSMP	922448	190	48	39960	11400	0	1	0	0	50	29	2459840	0.268314	1
FBXO41	536944	452	20	239960	80680	0	3	0	0	43	6	1602480	0.26834	1
STXBP6	259495	800	-3	63000	15360	0	1	0	0	50	27	2262800	0.268442	1
ADM	860704	273	12	52040	16360	0	1	0	0	50	39	2716120	0.268455	1
CDH3	777628	299	24	237160	68840	0	3	1	0	25	12	1817960	0.268456	1
MAGEA4	125659	NaN	-21	87880	27080	0	2	0	0	50	21	2272160	0.268721	1
FRS3	429684	341	47	137160	42720	0	3	1	0	50	28	2203200	0.269059	1
GCM1	414446	329	20	126280	32960	0	2	1	0	50	20	2448240	0.269122	1
COQ10A	2878071	171	46	73920	22320	0	3	0	0	50	74	2747200	0.269194	1
ARL6IP6	275277	716	6	63240	19920	0	1	0	0	50	19	2269440	0.269221	1
MYRIP	195545	917	9	248120	69160	0	5	1	0	50	23	2509920	0.26925	1
AURKA	254679	672	-43	117440	31840	0	3	0	0	10	12	741240	0.269338	1
RPAP2	363408	559	0	181120	45680	0	3	1	0	26	9	1367680	0.269342	1
BTBD19	NaN	NaN	NaN	81320	27160	0	2	1	0	50	61	4481720	0.269398	1
LENG8	807048	535	-7	229120	66440	0	10	1	0	20	10	737280	0.269621	1
SNRNP35	1090769	424	50	71160	20280	0	1	0	0	39	16	1712960	0.269808	1
C12orf39	518837	836	-23	35200	9560	0	1	0	0	50	25	1881000	0.270295	1
C16orf62	340032	578	15	286640	75040	0	4	0	0	44	14	2882800	0.270311	1
RPUSD2	892776	192	48	150120	47400	0	2	0	0	11	2	760160	0.270402	1
OLFML2A	1076828	207	26	183560	54880	0	7	3	0	50	45	2208400	0.270716	1
CDX1	1002307	228	49	72400	24560	0	4	2	0	10	13	414880	0.270733	1
LILRB2	717623	458	-6	169720	52160	0	6	1	0	23	17	994840	0.270761	1
SSRP1	926574	191	-11	210320	52480	0	7	2	0	50	28	1971840	0.270889	1
NBPF7	415110	581	26	124280	30880	0	2	0	0	50	23	2351400	0.270907	1
PPY	920082	241	29	26960	8800	0	1	0	0	50	21	1962200	0.270915	1
ADAMTS14	546305	566	37	350000	101800	0	7	2	0	50	33	2718400	0.270922	1
DBN1	1079488	261	50	195080	56440	0	3	0	0	20	3	869920	0.271195	1
TCP10	254009	704	1	94440	26880	0	1	0	0	50	23	2815840	0.271362	1
GORASP1	213514	500	30	124520	38320	0	2	0	0	50	12	2370760	0.271915	1
B3GALT6	2356409	196	27	87240	31800	0	3	1	0	25	45	1708000	0.272372	1
PRELP	529605	314	28	106000	32840	0	5	0	0	9	2	369240	0.272659	1
PVRL3	79394	878	-15	155440	44960	0	2	0	0	50	27	2979280	0.27268	1
PATE3	NaN	NaN	NaN	29920	6920	0	1	0	0	50	60	4461480	0.272707	1
THOC7	153669	826	-6	62880	14280	0	1	0	0	50	25	2173040	0.272857	1
CEP68	647041	340	38	208600	67160	0	4	2	0	39	22	1817600	0.272951	1
H3F3A	866965	237	23	38560	12200	0	1	0	0	50	31	1803640	0.273062	1
RLN2	385172	605	16	63760	16280	0	1	0	0	50	21	2451440	0.273484	1
TCTEX1D4	574317	191	43	58440	22440	0	2	0	0	50	29	2294640	0.273646	1
ARFGAP1	1278630	332	62	125120	31240	0	4	1	0	50	33	1921960	0.273825	1
TAX1BP1	393690	180	16	236160	55920	0	6	0	0	9	4	590120	0.273944	1
RBM15B	538437	536	39	240840	80160	0	10	0	0	21	15	1106080	0.274076	1
GJA4	548013	580	19	91040	29680	0	4	1	0	50	31	1975000	0.274106	1
AP2S1	1217560	186	44	42560	10840	0	2	0	0	50	61	2628080	0.27423	1
SLC19A1	422182	618	40	159960	55560	0	5	2	0	50	31	2312000	0.274498	1
NVL	626336	139	16	250520	68800	0	5	0	0	21	8	830720	0.274656	1
C20orf26	228680	750	-3	365440	96560	0	5	2	0	44	18	2159320	0.27487	1
PCOLCE	1767777	242	60	125920	40160	0	4	0	0	50	37	2461360	0.274881	1
SGK223	132314	199	43	384960	122040	0	8	3	0	35	14	1422960	0.274936	1
FOXN3	111760	684	20	141440	38200	0	2	1	0	50	19	2356880	0.275056	1
STRN3	431319	370	14	232760	62680	0	5	1	0	50	33	2578240	0.275234	1
ASPHD1	NaN	NaN	NaN	105120	36600	0	2	0	0	50	60	4491160	0.275332	1
BCAM	920101	196	-3	177600	56040	0	4	1	0	27	10	1153000	0.275409	1
TMEM64	184765	746	8	101640	36480	0	2	0	0	50	19	2542280	0.275524	1
LRRC32	269123	379	26	177280	62360	0	2	0	0	50	12	2576760	0.275584	1
TXNDC2	431025	168	34	157160	43480	0	6	3	0	17	17	913280	0.275624	1
SNX29	477277	758	18	126720	33960	0	2	1	0	50	13	1990480	0.27611	1
RRP7A	969686	196	65	81160	23120	0	2	0	0	50	43	2015880	0.276234	1
OR51T1	65798	1006	-15	97680	30000	0	1	0	0	50	10	2371320	0.276352	1
DLL1	374629	631	-23	207120	58320	0	6	0	0	24	9	892440	0.276465	1
ZNF583	135115	713	-50	167560	39560	0	2	0	0	16	5	1242600	0.276947	1
BMP10	404215	470	27	120520	32960	0	3	1	0	50	27	2834680	0.276971	1
GTSF1L	395176	374	38	43000	10880	0	1	0	0	50	29	2553040	0.277146	1
LRRC28	272870	380	-1	106280	30520	0	2	0	0	50	22	2821120	0.277326	1
AKTIP	247554	403	8	86640	23160	0	1	0	0	50	13	2316200	0.277435	1
FAM19A3	559669	325	27	51880	11120	0	1	0	0	21	7	965640	0.277734	1
ZSCAN29	823006	415	50	243720	65280	0	6	0	0	35	25	1951520	0.277762	1
STXBP5L	319082	785	-8	347800	92480	0	5	0	0	29	10	1734040	0.277772	1
HIST1H2BI	390169	544	57	35080	10880	0	1	0	0	50	21	1557600	0.277998	1
MS4A7	433906	899	24	69520	20120	0	1	0	0	50	13	2057240	0.278417	1
KLF6	129035	476	2	82520	21160	0	2	0	0	8	0	283080	0.278717	1
CLEC4M	719851	329	21	119480	29920	0	2	1	0	20	12	1134080	0.278742	1
EPHA8	407931	541	25	299000	91360	0	5	0	0	15	4	1136440	0.278931	1
TAF6	1299015	205	52	190720	60320	0	5	1	0	35	19	1439360	0.279243	1
CNOT10	464002	493	28	221120	55720	0	3	0	0	12	1	726840	0.279307	1
LINGO1	400940	503	38	169200	55080	0	7	3	0	34	22	1357120	0.279669	1
RIPPLY2	108781	870	-22	37960	9920	0	1	0	0	50	18	2313720	0.279685	1
PXK	574675	218	36	171480	45360	0	3	2	0	50	38	2631640	0.279697	1
CGNL1	189519	561	10	377160	100560	0	10	0	0	6	0	300360	0.279795	1
POU4F2	38882	987	-10	113240	34840	0	2	1	0	50	27	2641920	0.279994	1
C14orf119	1261207	185	41	39520	11600	0	1	0	0	50	24	2423920	0.280249	1
C5orf52	NaN	NaN	NaN	45840	12960	0	1	0	0	50	60	4467520	0.280437	1
MID2	167346	NaN	49	212640	56640	0	4	0	0	23	7	1062880	0.280486	1
PGPEP1	1294357	210	39	60920	16840	0	2	0	0	50	31	2479520	0.28057	1
PRCP	306726	371	-6	150120	40680	0	2	0	0	50	19	2338440	0.280919	1
FXR1	182655	1058	-2	183800	47800	0	5	1	0	38	13	1383320	0.281322	1
FAM43A	406498	421	39	114400	38240	0	2	0	0	50	27	2518880	0.281533	1
SEC61A1	817705	419	42	136480	40520	0	3	2	0	23	20	1233400	0.281651	1
CDADC1	329994	399	53	152680	37040	0	2	0	0	12	3	797720	0.281733	1
ATP6AP2	456094	NaN	63	101880	28560	0	2	0	0	43	26	1872920	0.281988	1
NME1	NaN	NaN	NaN	51800	14200	0	1	0	0	50	60	4468760	0.282291	1
ZBTB43	247985	252	46	134160	34800	0	3	1	0	50	33	2323040	0.282419	1
C18orf25	413073	142	58	114040	33320	0	2	0	0	26	9	1147520	0.282514	1
CACNB2	74282	408	4	221080	59600	0	7	1	0	8	1	321560	0.282603	1
MKI67	408820	641	-1	913080	266160	0	19	6	0	50	22	2172640	0.282644	1
MCM5	366628	224	3	212560	59720	0	5	1	0	36	21	1830680	0.282714	1
FAM189A2	216587	539	0	128080	39080	0	4	1	0	50	25	2174920	0.282818	1
BTNL9	893236	602	29	152200	45560	0	3	1	0	50	45	2673400	0.283271	1
SSPO	455147	615	28	1468040	436480	0	19	0	0	3	0	652000	0.283282	1
CD58	692758	418	19	74120	18880	0	1	0	0	50	25	2472120	0.283316	1
RBBP8	254087	158	40	273360	59400	0	4	0	0	34	4	1281000	0.283858	1
TTC26	562181	345	38	168960	39000	0	3	0	0	50	26	2329960	0.283874	1
LATS2	446900	192	41	304240	90680	0	9	1	0	50	32	1974160	0.284447	1
FKBP9	375055	235	13	163160	46720	0	2	1	0	29	6	1198240	0.284555	1
FTHL17	77068	NaN	8	51720	14760	0	1	0	0	50	29	2980720	0.284605	1
HNRNPF	368953	270	7	117600	32640	0	3	1	0	39	17	2159440	0.284849	1
TACR2	704483	285	50	112000	33560	0	3	2	0	24	8	858640	0.284875	1
TRIM58	87551	993	-35	136560	41400	0	1	0	0	25	5	1484440	0.285227	1
FBXO8	64734	647	-5	94080	23520	0	2	0	0	50	21	2306360	0.28545	1
CIB2	414873	271	56	56360	13720	0	2	0	0	50	29	1923000	0.285457	1
ZSCAN20	349443	614	31	298800	79920	0	5	0	0	43	18	2592400	0.285497	1
BCL2L10	540700	195	21	55560	18960	0	1	0	0	50	22	2123680	0.285601	1
IGFBP4	1202660	149	21	72560	22120	0	2	0	0	50	24	2093600	0.286127	1
MBD3L3	NaN	NaN	NaN	57600	18360	0	1	0	0	50	60	4472920	0.286178	1
AGTRAP	606580	187	36	63640	8000	0	2	0	0	50	48	2588080	0.286198	1
DDR2	322980	293	9	248920	66920	0	5	0	0	50	21	2538160	0.286231	1
SGSM2	780080	271	29	305080	84680	0	8	1	0	24	20	1485320	0.286454	1
MBTPS1	522600	435	8	304720	84440	0	6	1	0	30	9	1465040	0.286483	1
P2RY6	578209	176	56	88160	30760	0	3	1	0	50	48	2145080	0.286603	1
PRKX	104714	NaN	11	104920	28160	0	2	1	0	50	30	2345120	0.28672	1
MAVS	740484	241	42	148120	49520	0	4	1	0	16	8	856080	0.286936	1
BOD1	255069	371	31	54800	17080	0	1	0	0	50	23	2543080	0.286965	1
SPATA8	93099	986	-46	30480	8640	0	1	0	0	50	20	1982240	0.286965	1
SF3B4	798975	560	17	117480	38160	0	4	1	0	50	50	2573720	0.287024	1
FAM153B	592877	609	19	121080	28920	0	2	0	0	20	7	764120	0.287048	1
DAAM1	156241	405	32	319880	80560	0	5	2	0	50	23	2474120	0.287167	1
ST8SIA4	24350	1122	36	103480	28280	0	2	0	0	50	23	2624720	0.287272	1
TTC21A	213514	500	30	388000	101360	0	5	0	0	50	12	2370760	0.287289	1
MEX3B	229948	844	-8	153320	52360	0	2	0	0	50	20	2493200	0.287462	1
BACE2	197460	530	-6	146800	43880	0	2	0	0	50	14	2446160	0.2876	1
TRIB3	879317	185	41	96360	34080	0	3	0	0	50	34	2353960	0.288302	1
PDLIM1	302337	444	6	95560	26120	0	1	0	0	50	9	2040720	0.288444	1
OPTC	529605	314	28	94240	29000	0	3	0	0	9	2	369240	0.288477	1
TRIM47	1727802	178	35	175120	57560	0	5	1	0	50	33	2565080	0.288595	1
KCTD5	1803069	200	47	67960	19280	0	2	0	0	50	41	2171000	0.288622	1
PLEKHF2	385365	347	60	71320	19160	0	2	0	0	43	26	1899720	0.289237	1
NBPF3	563178	283	37	187480	47000	0	2	1	0	29	10	1479160	0.289437	1
ZFAND2A	774288	346	36	44640	9840	0	1	0	0	50	28	2080320	0.289499	1
SMAP1	169371	764	11	135960	37320	0	1	0	0	50	11	2329440	0.289809	1
LGALS14	1243326	439	23	50960	13360	0	2	0	0	50	37	1998680	0.289988	1
RBP2	232582	754	21	40840	9440	0	2	0	0	50	39	2469480	0.290042	1
CCR1	211405	639	48	98840	29800	0	3	0	0	12	4	462240	0.290051	1
QRFP	727815	241	22	36800	12400	0	1	0	0	50	33	2334600	0.290133	1
PARD3B	51582	973	-1	345560	99160	0	4	0	0	27	5	1348040	0.290636	1
SPACA3	286646	837	-10	62160	18000	0	1	0	0	50	15	2411680	0.291029	1
MMP11	637355	196	52	137320	42320	0	4	2	0	50	49	2305800	0.291341	1
RAB7A	1090310	277	54	61480	15800	0	2	0	0	50	53	2411480	0.291732	1
CHRNA1	414231	577	21	140040	38400	0	4	0	0	14	3	536480	0.291884	1
HIRIP3	NaN	NaN	NaN	159880	43520	0	6	0	0	50	60	4498080	0.291889	1
BYSL	437075	225	41	122880	37680	0	3	0	0	50	24	2072280	0.291943	1
OR10J5	492825	646	-4	85480	25880	0	1	0	0	50	20	2409280	0.291966	1
BCL6	88374	374	24	201880	56480	0	4	1	0	50	24	2306640	0.292118	1
PLEKHO1	1202779	309	41	115800	34440	0	3	1	0	50	38	2820880	0.292189	1
MEX3C	146631	570	45	177960	60120	0	3	1	0	17	6	963000	0.292338	1
DEFB125	86	430	NaN	43960	13040	0	1	0	0	50	19	2080200	0.292659	1
TP53I3	269570	385	38	93600	28680	0	2	0	0	50	15	2262240	0.292914	1
JAG1	165910	431	-28	362240	88600	0	7	2	0	50	32	2556760	0.29336	1
SUV39H2	255711	396	38	102200	26080	0	1	0	0	50	10	2315400	0.293641	1
RFTN1	117533	528	29	166160	46600	0	3	0	0	50	28	2631760	0.293801	1
OR51A4	65798	1006	-15	86400	26400	0	1	0	0	50	10	2371320	0.293809	1
EGFL8	2119974	392	28	85080	24600	0	2	0	0	18	9	853160	0.294229	1
KCNJ3	15788	1135	7	141440	40240	0	2	1	0	40	15	2067600	0.294485	1
USH1G	1045089	223	25	127040	40240	0	5	1	0	50	41	2235000	0.294519	1
LMCD1	92154	581	1	105040	29120	0	1	0	0	20	10	1547560	0.294675	1
DEPDC7	415951	215	25	154960	39200	0	2	0	0	47	18	1831000	0.295098	1
PCK1	181790	562	-4	180160	48440	0	3	2	0	50	23	2241280	0.295337	1
LIPE	704668	235	34	294920	97120	0	5	0	0	28	7	1310040	0.295414	1
EPN1	1050871	254	-11	190840	62120	0	5	1	0	50	28	2004600	0.295577	1
NDUFA10	271696	569	17	105800	26920	0	1	0	0	50	17	3127000	0.295712	1
MED28	271066	989	32	51520	14600	0	1	0	0	49	17	2183000	0.295928	1
TBC1D5	103389	701	9	242920	61640	0	4	0	0	46	24	3149600	0.296009	1
KCNE2	410767	518	61	36040	9080	0	1	0	0	50	13	1537400	0.296393	1
CREBL2	791567	157	32	36200	8800	0	1	0	0	50	35	2630120	0.296397	1
OR4D1	851306	401	14	85240	26480	0	2	0	0	50	37	2036000	0.296744	1
CRHBP	245514	418	17	93560	25600	0	2	0	0	50	25	2292920	0.296918	1
FCGR3A	693228	503	23	84120	22560	0	2	1	0	50	41	2404280	0.296989	1
OR9Q2	637499	828	-25	86560	27320	0	4	1	0	50	26	1869160	0.296997	1
TSPAN2	595238	555	4	65360	18160	0	2	0	0	50	63	3173800	0.297118	1
ANG	NaN	NaN	NaN	41360	12400	0	1	0	0	50	60	4466960	0.29726	1
ATP6V1B1	504483	623	25	149200	42320	0	4	1	0	26	8	776800	0.297451	1
DPP4	153730	528	9	232400	55720	0	3	1	0	50	17	2841760	0.297486	1
OR1A1	506514	628	0	85400	25960	0	1	0	0	50	20	2578880	0.297795	1
PAIP2	835535	177	41	39520	8000	0	1	0	0	50	28	2095960	0.297872	1
RRAD	942986	142	34	86080	27560	0	4	0	0	50	49	2420440	0.297988	1
EDN1	198728	410	27	63040	15560	0	1	0	0	50	11	2314360	0.298114	1
SYS1	1005559	233	36	44040	13920	0	3	1	0	20	21	811160	0.298172	1
YPEL5	141747	692	18	34920	9960	0	2	0	0	50	36	2081600	0.298498	1
HAVCR2	166999	1198	18	86840	24760	0	2	0	0	50	29	2163400	0.298784	1
ACTA1	243405	361	29	108680	30280	0	2	0	0	50	19	2266680	0.298835	1
CORO2A	494263	272	50	152080	42320	0	4	3	0	33	17	1222800	0.299097	1
RNPC3	NaN	NaN	NaN	41680	12200	0	1	0	0	50	60	4466760	0.299311	1
PTGFRN	760797	540	24	246320	74320	0	4	1	0	18	7	1174440	0.299325	1
HDGFRP2	2094827	278	40	195280	54560	0	8	1	0	50	36	2390200	0.299436	1
GOLGA5	360146	405	41	213280	56000	0	3	0	0	31	14	1847920	0.299539	1
FOXP1	99202	675	-1	215240	56800	0	3	1	0	50	20	2318040	0.299701	1
MRPL44	314020	346	23	94200	27360	0	2	0	0	50	25	2567480	0.299728	1
TSPAN17	579630	359	40	96920	26800	0	2	1	0	50	25	2421840	0.299741	1
C17orf98	1198833	207	37	44440	12560	0	2	0	0	50	38	2042800	0.299786	1
ENKUR	159854	276	8	76560	18360	0	1	0	0	50	23	2160280	0.299838	1
BTN3A3	384310	375	47	167360	47560	0	3	1	0	50	20	1949120	0.299963	1
ALPPL2	307666	204	37	150320	46600	0	3	0	0	50	27	1837400	0.300231	1
ELOVL4	151698	913	-14	92640	23160	0	1	0	0	50	18	2209440	0.30026	1
CDHR5	1774224	236	57	233640	77640	0	6	1	0	22	10	953280	0.300293	1
DNAJB1	1008795	204	26	96480	27480	0	2	0	0	50	44	2308640	0.300535	1
TNS1	500812	399	23	488760	149640	0	8	2	0	32	13	1719080	0.300547	1
SUCNR1	200470	526	2	94720	26840	0	3	1	0	41	35	2235040	0.300612	1
CDA	631461	208	35	42840	11520	0	1	0	0	50	43	2456880	0.30087	1
RBP7	744954	240	24	41240	9040	0	1	0	0	46	31	2370400	0.301009	1
WDR46	1456953	262	30	174880	51800	0	3	1	0	50	33	2353400	0.301068	1
NPFF	1469374	191	55	32680	9560	0	1	0	0	50	35	2097080	0.301284	1
WNT2	331093	392	5	104120	27760	0	2	0	0	50	19	2401480	0.301292	1
ZNF517	1454261	384	20	137200	42200	0	5	2	0	50	62	2622200	0.301449	1
FUBP1	373296	256	1	188560	53000	0	4	0	0	38	22	2300880	0.302234	1
TFAP4	944378	161	33	96800	28120	0	4	1	0	50	47	2364320	0.302839	1
2021-09-05	728313	211	8	111160	27320	0	3	0	0	50	28	2522560	0.302928	1
KBTBD2	373657	264	15	177640	47960	0	2	1	0	43	8	1716640	0.30298	1
RAB25	2005405	213	39	60800	18160	0	1	0	0	50	34	2445880	0.303347	1
FAM49B	272194	242	6	97360	24440	0	1	0	0	50	21	2562640	0.303392	1
NOP58	386034	270	50	158360	39160	0	3	0	0	50	22	2203240	0.303684	1
NEU1	2485614	188	36	116200	35960	0	3	0	0	36	14	1502720	0.303701	1
IRGC	452493	192	-2	125240	42520	0	5	2	0	50	39	2318240	0.303974	1
LRRC66	91954	815	7	249280	69560	0	4	0	0	50	17	2443200	0.304927	1
NME7	270055	491	12	112480	28760	0	3	0	0	8	2	365360	0.305109	1
SESTD1	66477	684	11	207160	51920	0	2	0	0	24	7	1367320	0.305193	1
ATP8B4	278209	408	-21	352560	89880	0	5	1	0	50	24	2590000	0.305583	1
CMTM1	777342	214	9	80560	24440	0	3	1	0	50	31	2413360	0.305649	1
LRRC8C	300032	514	7	227000	63400	0	3	0	0	50	17	2369760	0.305835	1
ARHGAP11A	244857	383	1	296800	79880	0	4	0	0	50	27	2964040	0.305966	1
LYPD2	427585	373	34	35240	11560	0	1	1	0	10	1	262480	0.306142	1
TFDP1	729832	370	53	121000	32240	0	3	0	0	50	26	2229000	0.306216	1
THUMPD2	117341	739	-8	148000	38000	0	3	0	0	15	3	632160	0.306221	1
SPINK4	856503	167	38	26320	6920	0	1	0	0	50	41	2384560	0.306262	1
IL25	1220624	456	31	51160	14720	0	2	1	0	50	74	2798200	0.306443	1
GLYATL3	NaN	NaN	NaN	82600	23840	0	2	0	0	50	60	4478400	0.30647	1
GAB3	1737597	NaN	10	168800	47440	0	3	0	0	27	19	1441360	0.306784	1
PLEK	208260	586	23	104720	25480	0	2	0	0	50	29	2405080	0.307037	1
TRIM65	1727802	178	35	143200	45920	0	4	1	0	50	33	2565080	0.307118	1
CELA3B	448600	190	29	78480	22680	0	2	0	0	32	24	1640280	0.307127	1
SSX7	250163	NaN	25	58520	12880	0	2	0	0	50	30	2722800	0.307248	1
TSLP	205349	738	6	46760	12280	0	1	0	0	50	22	2379000	0.307284	1
GLRX	315156	242	52	30800	8680	0	1	0	0	50	34	2331160	0.307457	1
RANBP6	350338	339	24	312400	86000	0	4	1	0	50	21	2568080	0.307906	1
GJA3	405200	472	50	118960	38480	0	4	1	0	47	43	2566960	0.308068	1
POU3F2	171189	927	-7	121840	38000	0	1	0	0	50	13	2233640	0.308399	1
MAN1A1	105366	702	6	188400	52320	0	2	0	0	45	17	2544000	0.308412	1
DAGLB	NaN	NaN	NaN	195880	53120	0	4	1	0	50	61	4507680	0.308427	1
RRH	212757	462	28	98480	26320	0	1	0	0	50	16	2033400	0.308541	1
C2orf40	99910	798	0	43440	11640	0	1	0	0	50	24	2377760	0.308619	1
NDUFC2	556958	209	38	34360	9800	0	1	0	0	50	36	2199920	0.308867	1
VASN	754886	161	41	175840	67280	0	11	1	0	50	32	2233280	0.308876	1
EGR1	1202314	205	51	148560	47760	0	7	2	0	23	23	1117360	0.308953	1
CLDN25	148947	534	4	62640	20160	0	1	1	0	50	16	1953320	0.309078	1
PLIN5	2111443	278	43	129080	41320	0	2	1	0	50	31	2412960	0.309179	1
MSL2	206721	398	16	161800	46760	0	4	1	0	50	37	2007160	0.309261	1
PUF60	2279638	229	25	159680	47440	0	4	2	0	46	89	2965240	0.309382	1
GIT1	719319	383	30	222440	64720	0	5	0	0	31	13	1562000	0.309436	1
FGG	59962	1036	-4	136560	32760	0	2	0	0	22	11	1102080	0.309473	1
OR52L1	432250	877	-13	89920	29360	0	1	0	0	50	18	2038760	0.309615	1
HMBS	1390854	195	58	106040	30520	0	3	0	0	50	34	1932040	0.30963	1
FAM3C	100604	535	-1	69680	16720	0	1	0	0	50	29	2711120	0.309744	1
GJA5	NaN	NaN	NaN	99840	29880	0	3	0	0	50	60	4484440	0.310151	1
SEC14L3	657636	288	48	119160	30720	0	2	0	0	50	28	2208160	0.310165	1
ST7L	561127	355	19	172520	46000	0	2	0	0	50	22	2425640	0.310428	1
SH3GLB1	315130	393	-12	107680	27920	0	2	0	0	50	19	2112480	0.310554	1
HMGB4	131426	852	9	53680	13880	0	1	0	0	50	24	2363480	0.310721	1
PLCL1	627125	907	10	312840	84120	0	4	1	0	14	3	954000	0.311254	1
KLK8	536101	606	25	89160	23640	0	1	0	0	50	21	2241120	0.312098	1
CFHR5	217857	853	-24	167360	42160	0	2	1	0	50	20	2232440	0.312125	1
COL6A5	202934	533	11	732160	196280	0	9	1	0	50	18	2655680	0.31242	1
NIPAL4	266195	1087	41	129440	41080	0	1	0	0	50	11	2018280	0.312422	1
IRX5	100202	762	-46	131240	43960	0	1	0	0	17	5	1262720	0.312544	1
KCND2	49438	962	7	177520	52040	0	5	1	0	11	3	695680	0.312598	1
MICAL2	319572	254	10	326960	90520	0	4	0	0	29	6	1328080	0.313199	1
P2RX7	1061231	396	46	175280	45280	0	4	1	0	50	32	2124080	0.313213	1
TMPRSS11A	212678	809	4	124240	32000	0	2	0	0	49	16	2054440	0.313404	1
OSGEP	464497	395	17	97040	28720	0	2	1	0	50	36	2402880	0.313526	1
PCID2	759371	229	38	121400	29560	0	2	0	0	50	24	2549200	0.313773	1
TAS2R19	365490	676	-2	83040	24840	0	1	1	0	50	17	2005680	0.314236	1
POTEH	66885	909	-64	162280	39200	0	3	1	0	50	38	2497680	0.31446	1
FOLH1	11046	1009	-19	220800	58200	0	4	2	0	50	27	2403480	0.315313	1
MORN3	743586	194	50	72240	16920	0	3	0	0	50	35	1835360	0.315348	1
ARRDC1	1197708	478	45	121040	38800	0	3	1	0	50	75	3146440	0.315493	1
CPA1	419615	298	27	122280	33720	0	6	2	0	19	14	686040	0.315532	1
OR5A1	430021	507	-1	86560	27200	0	1	0	0	50	20	2386640	0.315675	1
B3GALT2	NaN	NaN	NaN	119760	32520	0	2	1	0	50	61	4487080	0.315783	1
MMP3	468929	506	-21	139360	37280	0	3	0	0	50	51	3009200	0.315942	1
PXN	1615004	187	57	170440	47960	0	5	0	0	50	40	2726000	0.316159	1
RIC8B	230956	396	11	149960	41440	0	2	0	0	44	27	2505600	0.316244	1
TMEM14A	531039	498	18	29320	8600	0	1	0	0	50	33	2081720	0.316916	1
MAP3K8	81826	185	39	135000	36840	0	2	1	0	50	25	2335960	0.317072	1
PRAF2	833689	NaN	41	48440	17200	0	1	0	0	50	34	2439880	0.317194	1
PRAP1	386585	472	13	44880	12000	0	1	0	0	50	25	2214920	0.317241	1
ABHD12	608597	348	-3	122760	33840	0	2	0	0	35	18	1618400	0.317456	1
DEF6	682809	264	39	182480	50080	0	4	1	0	27	19	1285800	0.317468	1
SPEF1	860065	241	43	68720	19480	0	1	0	0	50	34	2702760	0.317544	1
STEAP3	176742	558	14	137160	44400	0	3	1	0	50	25	2139560	0.317603	1
EFR3B	NaN	NaN	NaN	239320	65720	0	4	0	0	50	60	4520280	0.318634	1
RAB4A	285692	361	9	65480	16720	0	1	0	0	50	18	2670320	0.318636	1
CLINT1	227687	916	44	183280	47360	0	2	0	0	50	12	2033800	0.318879	1
OR52E2	97256	1024	-11	90280	26960	0	1	0	0	50	18	2845480	0.318942	1
IRAK2	744536	224	49	180080	51280	0	3	0	0	37	21	1738520	0.318998	1
TBL2	955146	171	48	127360	36800	0	2	1	0	44	22	1952400	0.319046	1
TUBB2B	451139	453	37	127000	35000	0	2	0	0	50	22	1946400	0.31915	1
PDCL	433740	487	10	88480	21680	0	2	1	0	48	26	1873640	0.319245	1
FRMD5	929260	504	33	166600	45200	0	2	1	0	40	14	1490400	0.319307	1
KHK	1214097	238	50	104840	30160	0	2	0	0	27	24	1556880	0.319468	1
CREB3L1	801520	158	36	149080	43400	0	3	1	0	50	30	2158880	0.319709	1
LILRA1	978578	625	-1	138640	42080	0	12	4	0	8	23	520440	0.319751	1
FAM161B	443041	158	51	184600	52760	0	4	0	0	50	26	2154200	0.319907	1
C2orf49	198223	381	8	67200	18360	0	1	0	0	50	17	2118080	0.320148	1
STC2	471196	519	41	86200	24320	0	2	1	0	50	46	2633560	0.320566	1
ZNF800	313691	807	-5	191280	50640	0	2	1	0	50	19	2688360	0.320784	1
C20orf166	1191147	NaN	20	34160	9520	0	1	0	0	50	40	2306240	0.321171	1
COPZ1	664708	190	45	54320	13840	0	1	0	0	50	41	2506520	0.321295	1
CCDC19	803074	403	7	163400	40840	0	5	1	0	50	22	1690320	0.321334	1
ZNF311	143617	569	25	194520	48000	0	4	0	0	47	18	2017160	0.321439	1
C22orf15	637355	196	52	43240	12800	0	1	0	0	50	49	2305800	0.321443	1
NMNAT3	224111	848	9	62080	17120	0	1	1	0	50	19	2140040	0.321728	1
ISM1	117713	704	-35	133440	36600	0	3	0	0	9	10	760960	0.321733	1
UBA1	819569	NaN	38	305280	87720	0	9	0	0	25	9	973680	0.321846	1
ZC3H12A	446254	357	25	165600	52800	0	6	1	0	50	19	1865520	0.321912	1
FBXO3	755929	424	15	140040	35760	0	3	0	0	50	22	2155640	0.321971	1
ISG15	1971475	239	15	45520	14960	0	2	0	0	50	64	2865400	0.321996	1
FGF6	291341	908	23	58000	18680	0	1	0	0	50	18	2332400	0.322363	1
CNTN2	655446	431	37	296360	88960	0	6	0	0	29	15	1565840	0.32244	1
FGF8	817474	335	37	69960	20640	0	2	0	0	50	46	2270240	0.322446	1
ANKRD55	248990	402	45	177640	49040	0	2	1	0	50	22	2228280	0.32259	1
GPBP1	177326	375	19	142920	35520	0	4	0	0	48	35	2163840	0.322801	1
FCRLB	598281	504	20	117480	38880	0	2	0	0	50	31	2101240	0.323118	1
GALK2	315919	528	8	135560	36880	0	2	1	0	50	23	2463400	0.323762	1
TRIM45	331822	566	12	164440	47120	0	3	0	0	19	2	622440	0.323803	1
CNTFR	843127	370	55	105680	32320	0	2	1	0	38	16	1418840	0.324123	1
AP3M1	776926	227	49	121920	32760	0	2	0	0	50	24	2167240	0.324139	1
CENPI	426524	NaN	26	226560	55800	0	3	1	0	50	29	2582200	0.324242	1
IMP4	369510	593	29	84080	25120	0	3	0	0	50	17	2356680	0.324333	1
RBM17	576205	399	45	118240	31760	0	4	1	0	50	48	2567760	0.324366	1
DNAJB6	318088	174	22	99800	26200	0	1	0	0	50	27	2941120	0.324398	1
FABP9	191177	595	1	40000	9200	0	1	0	0	50	27	2295240	0.324419	1
BCORL1	389645	NaN	38	489640	159560	0	14	2	0	34	27	1664680	0.324783	1
FAM103A1	452169	683	19	38000	6040	0	1	0	0	50	35	2765520	0.324929	1
LEPR	178338	528	-8	363800	91960	0	3	0	0	43	13	2384160	0.324957	1
CCDC11	211344	300	35	154160	34840	0	3	1	0	29	15	1358200	0.325092	1
ZNF48	2338593	142	59	169560	54000	0	7	0	0	14	7	588240	0.325159	1
NKD1	307084	646	-6	135040	38840	0	4	0	0	50	32	2606200	0.32543	1
TRIM59	435184	513	16	116360	29560	0	2	0	0	16	10	992240	0.325577	1
AMT	1585328	201	32	116920	35720	0	2	0	0	50	24	2134560	0.325703	1
ARF5	411207	619	-7	53080	14720	0	2	0	0	50	21	1690840	0.32576	1
RFXANK	940952	232	17	75240	22560	0	3	0	0	50	47	2319680	0.326027	1
ELK3	267884	525	23	112840	35960	0	2	0	0	30	13	1532400	0.326107	1
RELL1	137374	764	41	78480	22560	0	2	0	0	50	24	2207040	0.326116	1
TOPORS	474275	362	-7	294480	83040	0	10	0	0	27	16	1510880	0.326228	1
CSDE1	600480	472	3	247080	66240	0	6	0	0	32	10	1191480	0.326359	1
RERG	354506	469	3	57640	15800	0	2	0	0	4	3	278320	0.326628	1
ELMO1	63863	859	16	218640	53520	0	4	0	0	36	11	1429560	0.326734	1
SLC29A4	1791782	289	11	149280	47040	0	3	1	0	13	9	923280	0.326882	1
SNRNP70	2041001	200	41	124320	37680	0	4	0	0	50	37	2619800	0.326914	1
DMKN	954618	367	35	168560	48400	0	4	0	0	50	34	2232720	0.327184	1
RTKN2	111669	382	9	179800	45320	0	2	0	0	46	20	2406760	0.327306	1
RNF208	1724821	399	43	70200	24120	0	2	0	0	50	44	1869280	0.327306	1
MARVELD1	NaN	NaN	NaN	46200	16440	0	1	0	0	50	60	4471000	0.327392	1
MED11	1272092	222	28	33720	9960	0	1	0	0	50	39	2684560	0.328025	1
SMAD4	156084	422	41	160560	43320	0	2	1	0	50	26	2786760	0.328107	1
PCDHA11	NaN	NaN	NaN	263720	84400	0	4	2	0	50	62	4538960	0.328273	1
KBTBD6	314264	337	66	188200	54800	0	4	2	0	50	41	2552360	0.328294	1
NOL11	692622	197	7	212080	55520	0	4	0	0	21	11	1128120	0.328299	1
GAGE10	547555	NaN	25	35440	8840	0	1	0	0	50	24	2313560	0.328478	1
ISOC1	38196	985	-2	83840	25960	0	1	0	0	50	19	2016480	0.328491	1
PRM2	632841	308	37	29600	7960	0	1	0	0	50	41	2464920	0.328582	1
HPSE2	147172	933	2	173160	50640	0	2	0	0	17	2	764920	0.328588	1
DDIT4L	193061	795	-8	55200	15600	0	1	1	0	12	3	510280	0.32879	1
ZNF496	352232	742	-15	167640	47400	0	5	3	0	18	5	648400	0.328914	1
MAN2C1	814680	296	43	298960	88040	0	5	1	0	50	33	2227520	0.329186	1
ASMTL	NaN	NaN	NaN	186080	54040	0	4	2	0	50	62	4508600	0.329442	1
PRKACG	168122	498	36	99120	27840	0	3	2	0	26	18	978480	0.329599	1
ADCY3	284877	296	37	328080	93960	0	6	4	0	23	8	879760	0.329607	1
F2RL1	248362	418	25	109720	34040	0	1	1	0	50	11	2121560	0.329852	1
NFATC2	363545	482	28	269720	82600	0	6	2	0	50	27	2540120	0.330043	1
CXCR2	694517	301	27	98640	31800	0	4	1	0	9	9	548640	0.330107	1
FAM183A	1068006	294	30	40720	9800	0	1	0	0	50	40	2280840	0.330151	1
PRRG3	125659	NaN	4	65360	19600	0	1	0	0	50	17	1987680	0.330186	1
PRPF4	426351	312	26	153720	41040	0	4	0	0	44	23	1857280	0.330239	1
GNA12	764046	392	30	107800	31160	0	2	0	0	50	35	2369800	0.330242	1
RNF121	737476	311	53	96720	25200	0	2	0	0	50	21	1608120	0.330406	1
TMPRSS11F	211571	812	-6	128760	33840	0	1	1	0	50	16	2400880	0.330591	1
DCLRE1B	335231	545	13	148920	44400	0	3	1	0	19	3	626080	0.330702	1
OR7E24	398878	582	-50	94560	27840	0	4	0	0	7	4	280000	0.330723	1
CHRNA4	1278630	332	62	173160	55320	0	6	1	0	50	33	1921960	0.330902	1
BDH2	350185	454	27	73680	19200	0	1	0	0	50	22	2647680	0.331079	1
GRHL1	913916	234	40	182480	47560	0	3	0	0	50	37	3020120	0.33111	1
CBX3	915230	445	43	55800	12840	0	1	0	0	34	21	1745680	0.331181	1
CCDC124	1366136	217	36	64480	18080	0	2	0	0	50	43	2727800	0.331188	1
RIMS3	678456	421	20	87360	26760	0	3	0	0	50	35	2536240	0.331411	1
AADACL2	91028	611	-5	115240	31400	0	2	0	0	50	14	2559760	0.331781	1
RFX5	1322568	174	42	171640	54800	0	5	1	0	50	33	2626480	0.331988	1
BAHD1	888588	192	47	212960	71080	0	4	1	0	5	1	554360	0.332002	1
PQBP1	834040	NaN	38	78520	20840	0	4	1	0	46	29	1428120	0.332195	1
FRK	230837	693	-4	147360	38160	0	3	0	0	50	31	2263680	0.332215	1
NPBWR1	99395	697	-19	87040	31280	0	1	0	0	34	18	2146880	0.332261	1
RTP1	425258	445	28	74920	20840	0	2	0	0	50	34	2820280	0.33232	1
SLC7A7	1153069	351	36	144920	43720	0	3	0	0	50	27	1990560	0.332326	1
KDM4B	993857	258	26	313760	91240	0	7	3	0	50	28	2270240	0.3324	1
RNASEH2B	137500	621	34	98440	23240	0	1	0	0	33	11	1436920	0.332443	1
FAM107B	256093	327	36	89120	23320	0	3	1	0	33	14	1227800	0.332454	1
ZNF524	1077402	254	-10	71200	24680	0	2	0	0	50	25	1914720	0.332714	1
ABAT	402778	358	-10	148800	38760	0	3	1	0	50	27	2349240	0.332762	1
BNIPL	1614665	165	40	102840	30360	0	2	0	0	50	25	2288760	0.332923	1
DTX1	562320	387	44	171960	55440	0	5	2	0	46	36	2203400	0.333025	1
KCNJ9	829863	386	17	108200	34120	0	3	1	0	50	42	2401320	0.333539	1
UGT1A9	320853	284	24	151200	42120	0	3	0	0	15	5	867160	0.33371	1
VSX2	652027	358	47	101920	30560	0	2	0	0	33	17	1498280	0.333761	1
MIOS	213895	446	16	253400	66760	0	5	0	0	15	5	871320	0.333883	1
GPR78	96216	471	31	96160	35840	0	2	1	0	50	22	2446680	0.334458	1
SPAG7	1416161	231	30	68480	16720	0	1	0	0	50	31	2099000	0.334605	1
DUSP4	307440	267	42	124000	39080	0	4	0	0	48	25	1883320	0.334774	1
RNF43	782135	399	22	217360	68720	0	6	0	0	4	1	282080	0.334793	1
RNF215	696089	214	57	104680	35240	0	3	0	0	50	47	2556880	0.334802	1
NPY1R	74427	1197	-18	109600	29480	0	2	0	0	50	32	2453400	0.335033	1
VANGL2	987855	526	28	145480	45320	0	4	0	0	49	30	2170800	0.335293	1
FCN2	229567	450	26	90880	25760	0	1	0	0	50	13	1879320	0.335355	1
SLBP	884891	350	36	80800	20120	0	2	0	0	50	50	2722160	0.335356	1
C1orf146	304492	524	-3	54040	13520	0	1	0	0	50	23	2575120	0.33541	1
CNNM3	879415	332	48	191200	67280	0	3	0	0	8	2	695000	0.335434	1
ATP5J2	1327454	288	60	31920	7200	0	1	0	0	50	30	1935160	0.335786	1
NMRAL1	751633	160	39	85520	25120	0	3	0	0	50	31	1960080	0.335998	1
GPLD1	399209	465	7	250000	69200	0	5	1	0	18	7	875920	0.336081	1
UBTD1	560569	169	41	64000	19040	0	1	0	0	50	21	2286560	0.336267	1
NEUROD1	210899	380	17	100800	28200	0	3	0	0	50	34	2006920	0.33641	1
GADD45GIP1	1886809	335	40	61680	19560	0	1	0	0	50	34	2043840	0.336425	1
CCDC132	260737	785	8	293080	72320	0	2	1	0	50	14	2669040	0.336461	1
COPB1	365537	228	11	279360	74160	0	2	0	0	31	4	1434800	0.336538	1
IL10	464449	357	29	53240	13360	0	1	0	0	27	13	1537080	0.336672	1
SUOX	2080397	229	31	150000	48000	0	4	0	0	37	27	1684560	0.336864	1
BIRC2	463959	312	15	180240	45960	0	3	0	0	50	22	2206880	0.337236	1
ZNF574	886688	438	31	242480	80920	0	16	1	0	10	2	410360	0.337363	1
VPS52	1456953	262	30	209200	60560	0	5	1	0	50	33	2353400	0.337382	1
SNRNP27	844060	221	37	46320	12480	0	1	0	0	50	34	1967120	0.337568	1
TAS2R1	349235	840	-18	83520	24480	0	1	1	0	48	20	1940800	0.33758	1
ACTA2	181406	267	30	109960	29960	0	2	0	0	50	22	1954480	0.33775	1
CLDN10	228898	397	50	85520	25000	0	1	0	0	50	16	2405120	0.337896	1
C18orf21	399000	585	15	64400	17080	0	1	0	0	50	23	2477240	0.338068	1
USP19	1898051	203	36	374320	112040	0	10	5	0	33	35	1929680	0.338204	1
CACHD1	213591	581	-6	357880	95240	0	3	2	0	50	12	2288960	0.338268	1
DMBX1	592811	255	23	105880	33680	0	5	0	0	50	31	2093200	0.338348	1
GPATCH2	42648	1015	-18	155000	40000	0	3	0	0	18	11	1030920	0.338508	1
SNAP23	552242	269	39	63760	15920	0	1	0	0	50	22	2353960	0.338595	1
ARPP19	469724	386	15	32960	8680	0	1	0	0	50	26	2231160	0.338711	1
CXCR6	NaN	NaN	NaN	96760	27200	0	2	0	0	50	60	4481760	0.338753	1
OR2T8	87551	993	-35	85760	26680	0	1	0	0	50	22	2723520	0.338945	1
ZNF513	1244404	179	39	149000	47560	0	3	0	0	12	4	607960	0.338948	1
TSPO2	145501	611	37	47200	15800	0	1	1	0	28	11	974680	0.33895	1
EXOSC7	479578	326	41	85120	23840	0	2	0	0	50	30	2241680	0.33905	1
DGCR2	474521	277	16	157960	44720	0	3	1	0	50	20	2247200	0.339056	1
AGPAT9	186399	436	21	126960	34920	0	2	0	0	50	24	2103120	0.339301	1
STMN2	147465	518	-12	53560	13400	0	1	0	0	50	34	2919520	0.339375	1
OLAH	255576	571	28	94000	24200	0	2	0	0	50	34	2490920	0.339535	1
EBI3	2132502	244	39	64760	20200	0	1	0	0	50	35	2304560	0.339672	1
GRB10	185646	602	-4	175400	46240	0	2	0	0	50	15	2293960	0.339899	1
TRIM50	902769	422	52	137040	41520	0	5	1	0	20	10	837040	0.339953	1
HTR3B	182706	555	9	128360	34840	0	2	0	0	50	23	2577400	0.340075	1
CCL26	1012112	255	51	28240	7400	0	1	0	0	50	43	1908160	0.340282	1
THAP5	171249	838	6	114240	29520	0	2	0	0	50	18	2073800	0.340296	1
DAP	630950	435	29	30640	7880	0	1	0	0	50	49	2340240	0.340325	1
ESRRB	243524	616	39	145120	41960	0	2	1	0	50	14	1775400	0.34036	1
TP53I13	760947	353	26	107160	37800	0	3	0	0	50	34	2712040	0.340374	1
KCNE1L	203975	NaN	36	38280	13200	0	1	0	0	50	22	1720880	0.340495	1
C7orf33	473795	593	-4	49520	15520	0	1	0	0	50	29	2324400	0.340613	1
CARTPT	456944	601	19	32920	10160	0	1	0	0	50	38	1979240	0.340755	1
ECT2	301474	239	11	261600	67440	0	4	0	0	14	2	694760	0.340787	1
MAP7D2	263236	NaN	38	224520	61800	0	3	1	0	50	21	2181000	0.340829	1
HAS1	436280	690	-24	157200	53400	0	2	1	0	50	16	1861720	0.340977	1
TECTB	170055	567	-5	98040	25080	0	1	0	0	50	16	2131960	0.341127	1
LIN7C	371553	477	-10	57240	16200	0	1	0	0	50	36	2807080	0.341188	1
NDUFA4L2	2162032	238	58	26200	6920	0	1	0	0	50	54	2706440	0.341203	1
MRAP	436753	379	8	59120	17200	0	1	1	0	28	20	1715520	0.341292	1
NGFRAP1	448080	NaN	32	32920	7880	0	1	0	0	50	22	1891800	0.341343	1
TAGLN	426428	228	46	59400	15240	0	2	1	0	50	23	1945720	0.341393	1
ACPP	210154	765	13	125600	32800	0	1	0	0	28	4	1503320	0.3414	1
ZNF483	437885	309	22	220400	55960	0	2	0	0	50	11	2244680	0.341561	1
ZNF304	432083	869	-17	190880	47680	0	3	0	0	50	19	2036080	0.341709	1
PTK6	1262904	298	54	129160	37160	0	3	1	0	50	34	2113240	0.341712	1
SH3BP4	133390	408	-10	268160	80320	0	10	3	0	29	19	1408840	0.341768	1
ECHS1	386585	472	13	85880	22480	0	1	0	0	50	25	2214920	0.341799	1
SLC1A3	376343	436	11	155760	45840	0	2	0	0	50	16	2411120	0.341953	1
TMEM43	312564	463	27	115760	33880	0	2	2	0	38	19	1623560	0.342263	1
P2RY4	161347	NaN	27	98480	33280	0	2	1	0	18	10	938360	0.342423	1
MRI1	767214	289	6	109920	37080	0	3	0	0	50	53	3129520	0.342554	1
FOXD4L3	118303	887	1	112760	37960	0	2	1	0	14	4	591800	0.342806	1
GRHPR	534559	337	36	94120	28400	0	2	1	0	50	31	2367400	0.343026	1
C2orf74	NaN	NaN	NaN	56880	14760	0	1	0	0	50	60	4469320	0.34321	1
SYT8	916434	481	33	111760	37040	0	2	0	0	15	4	775440	0.343334	1
TINAG	58216	617	4	142320	34200	0	3	1	0	50	38	3111680	0.343421	1
CAPSL	138289	614	0	61600	15320	0	1	0	0	50	25	2156960	0.34352	1
UBE3A	241743	1263	-34	258280	65240	0	4	0	0	39	23	2663440	0.343664	1
COG1	221646	251	-11	278600	81520	0	5	0	0	20	7	925520	0.343667	1
ZBTB5	534559	337	36	190600	53960	0	3	0	0	50	31	2367400	0.34389	1
CRISPLD1	137515	703	-22	150160	36920	0	2	0	0	33	12	1623360	0.344143	1
TBC1D8	333394	406	17	331720	88160	0	6	1	0	24	8	1371120	0.344342	1
CEP97	547972	421	9	249360	67440	0	3	1	0	25	8	1308360	0.344553	1
RECQL4	1755818	291	7	337080	108120	0	7	1	0	16	12	893040	0.344569	1
SP4	105280	643	26	218160	66840	0	2	0	0	50	19	2477440	0.344598	1
RNASE4	709113	577	11	41960	11800	0	1	0	0	50	34	2767320	0.344632	1
PTPN3	352374	431	12	270200	70840	0	5	1	0	43	21	2377720	0.344748	1
GOLGA6B	1113552	419	37	197360	50560	0	3	1	0	50	27	1846840	0.344965	1
SNTA1	539120	237	49	138960	46560	0	3	1	0	50	31	2203240	0.344992	1
IQCF6	NaN	NaN	NaN	30480	8880	0	1	0	0	50	60	4463440	0.345158	1
AAGAB	312039	320	45	93880	24200	0	2	0	0	50	29	2509160	0.345478	1
CD151	1799017	232	51	73960	20840	0	2	0	0	50	26	2108280	0.345528	1
C19orf47	1006719	289	35	100240	31280	0	3	0	0	50	52	2465080	0.345657	1
POU6F1	496692	176	40	84760	26360	0	2	1	0	50	30	1939600	0.345779	1
TTC16	1098647	172	32	251000	70120	0	5	0	0	16	3	696200	0.345809	1
TIGD3	4112809	242	50	128440	41960	0	3	1	0	50	35	2325000	0.34612	1
SIGLEC8	393294	583	17	139120	44000	0	2	0	0	38	15	2167800	0.34623	1
LDHC	599909	176	42	96760	26480	0	1	0	0	50	17	2405280	0.346384	1
RAB40C	1115707	213	39	81360	23040	0	3	1	0	50	36	1906720	0.34645	1
S100A10	769085	225	29	29680	6560	0	1	0	0	24	22	1175120	0.3468	1
BRSK1	1032110	209	12	221200	67880	0	5	0	0	25	10	880720	0.347066	1
CNIH4	628752	256	18	42440	10120	0	1	0	0	50	26	2166360	0.347213	1
PYGM	2261775	230	61	244880	67720	0	7	1	0	50	51	2600640	0.347771	1
VSTM2B	NaN	NaN	NaN	78120	26760	0	2	0	0	50	60	4481320	0.34782	1
VSIG8	803074	403	7	116680	35600	0	3	0	0	41	18	1484320	0.34799	1
ZNF124	374414	704	-12	86040	19800	0	1	0	0	50	16	2220320	0.348137	1
ICT1	1111289	171	31	61080	16080	0	1	0	0	50	31	1947880	0.348295	1
WWC1	413858	343	23	322320	91680	0	5	0	0	33	11	1487800	0.348359	1
ZNF546	1181917	521	22	244200	59520	0	6	0	0	19	6	848280	0.34847	1
SLC39A11	276039	538	-34	97240	30560	0	3	1	0	50	36	2213880	0.348543	1
ADI1	254699	390	16	53200	13280	0	1	0	0	50	23	2417840	0.34866	1
ASCC1	761166	140	40	107000	26200	0	2	1	0	50	34	2406040	0.3487	1
ARHGAP33	1151198	321	30	351640	121640	0	9	2	0	28	14	1310880	0.348842	1
LYRM1	260596	545	33	35280	10200	0	1	0	0	50	53	2420800	0.34894	1
FRZB	330424	450	6	93320	26440	0	1	1	0	47	9	1914480	0.349082	1
MAGEB18	33808	NaN	-25	97800	27000	0	2	0	0	50	37	3194280	0.349097	1
METTL5	338901	489	35	67440	15960	0	1	1	0	9	2	439640	0.349245	1
CAPN5	403200	395	38	184800	51720	0	10	2	0	5	7	455440	0.349539	1
POU2F1	399046	569	0	209400	65640	0	2	0	0	23	6	1210360	0.349674	1
CDKN1A	904665	228	37	45360	15000	0	2	0	0	50	31	2080920	0.349688	1
FAU	3267059	207	46	38520	11880	0	1	0	0	50	35	2301440	0.349827	1
NPM1	300840	347	30	91320	21000	0	2	0	0	50	24	2257160	0.350036	1
CLEC7A	396940	445	-1	78280	17720	0	1	0	0	45	21	2024840	0.35008	1
AGR2	361606	385	-7	53280	13440	0	1	0	0	50	29	2421960	0.350098	1
ING1	560003	274	51	130560	39480	0	4	1	0	50	27	1871800	0.350166	1
PCOLCE2	398812	422	15	120760	32840	0	2	0	0	6	0	321600	0.350282	1
IFFO2	NaN	NaN	NaN	148160	42160	0	4	1	0	50	61	4496720	0.350443	1
CUTC	709789	139	18	79720	22760	0	2	0	0	50	46	2473480	0.350591	1
SMAD2	108087	185	42	137080	36200	0	3	0	0	30	14	1272400	0.350625	1
KLF15	181307	600	34	114840	36240	0	2	0	0	10	6	691800	0.350701	1
RAI1	1199281	260	16	520400	168040	0	20	5	0	50	54	2597280	0.350723	1
LYN	329738	405	50	152960	37480	0	3	0	0	31	12	1479400	0.351152	1
NUDT14	872033	260	25	62360	20080	0	2	0	0	27	21	1425080	0.351241	1
CRHR1	408198	563	16	129760	36680	0	2	0	0	50	14	2704840	0.351249	1
HIST2H3A	NaN	NaN	NaN	74160	25440	0	1	0	0	50	60	4480000	0.351427	1
HIST2H3C	NaN	NaN	NaN	74160	25440	0	1	0	0	50	60	4480000	0.351427	1
FAM3D	497368	503	38	68480	16840	0	2	1	0	47	44	2522240	0.35161	1
CUL3	255624	463	20	227120	56920	0	4	2	0	50	40	2825360	0.351659	1
ACE	874574	267	-20	397200	109560	0	7	1	0	34	26	1660760	0.351852	1
CAMKV	1298303	170	38	143800	41720	0	3	0	0	20	16	1142320	0.3519	1
KRTAP19-5	14979	1035	-68	20120	6040	0	1	1	0	19	9	250040	0.352074	1
FOXF1	70370	416	3	104640	32880	0	2	0	0	12	3	486560	0.352074	1
TAB2	431448	177	42	196920	55800	0	4	1	0	50	30	1979560	0.352108	1
HAVCR1	138350	1207	11	103280	31960	0	2	2	0	33	13	1480400	0.352126	1
DCTN3	731413	298	51	64800	17280	0	1	0	0	50	17	1827120	0.352204	1
FAM179A	471053	404	28	286200	89640	0	6	2	0	50	22	2342160	0.352218	1
OR5L2	4183	1091	-36	85520	26800	0	1	0	0	50	26	2346880	0.35227	1
IFNA14	193208	498	-3	54920	13720	0	2	1	0	18	12	556400	0.352307	1
EVX1	473864	394	13	109880	37960	0	1	0	0	14	2	708720	0.352337	1
PAK6	829569	167	31	189120	60240	0	5	2	0	47	32	2378480	0.352382	1
OR5K4	414958	885	-14	89880	25800	0	1	0	0	50	16	2083200	0.352429	1
NUAK1	143018	473	7	187440	53760	0	2	1	0	50	11	2023640	0.352455	1
OR4A15	1067	1102	-42	96120	27960	0	1	0	0	50	24	2238880	0.352569	1
ZNHIT1	1022626	258	39	45000	12720	0	2	0	0	50	53	2214080	0.35265	1
STAMBPL1	175317	289	20	129320	32800	0	3	0	0	50	33	2085360	0.353087	1
CRISPLD2	444452	243	21	147840	38160	0	2	1	0	50	20	2197240	0.35319	1
THSD7A	138176	906	-11	483920	125440	0	10	1	0	38	23	2629880	0.35319	1
DYRK2	232901	596	-9	168120	49560	0	2	0	0	30	8	1541640	0.353221	1
EXO1	173100	325	-16	245080	66080	0	2	1	0	50	15	2534040	0.353514	1
PAX5	429504	542	34	112400	33040	0	3	1	0	11	4	562440	0.35352	1
ERI3	758083	308	29	98160	27360	0	1	0	0	50	26	2734800	0.353629	1
FAM69A	609398	372	13	124720	31880	0	2	0	0	50	31	2311440	0.353659	1
SULT4A1	157623	473	13	84160	21320	0	1	0	0	50	29	2534040	0.353804	1
SUSD5	496534	256	21	175280	53440	0	2	1	0	50	11	2034120	0.353941	1
KIF5B	360559	166	29	289400	69640	0	4	1	0	50	22	2526200	0.353946	1
OR5F1	4262	1044	-40	86800	26480	0	1	0	0	50	19	2676600	0.353972	1
OVGP1	397926	461	18	192720	56760	0	4	0	0	44	33	2220680	0.354088	1
SECISBP2	163101	627	15	248800	66920	0	4	0	0	8	0	329000	0.35429	1
SDR9C7	2103486	286	26	88080	26400	0	3	0	0	50	46	2741720	0.354525	1
CLEC12B	305376	565	19	84000	20160	0	1	0	0	50	26	2939640	0.354721	1
RNGTT	202476	672	37	178600	43880	0	2	0	0	50	15	2378480	0.354747	1
OR51A2	65798	1006	-15	86640	26160	0	1	0	0	50	10	2371320	0.35483	1
NCOA4	406207	579	41	192400	48200	0	3	1	0	50	38	2580320	0.354929	1
PTGS2	275352	552	-19	175760	46360	0	4	1	0	50	47	2943640	0.355087	1
EFHB	103479	720	-15	241480	64520	0	3	0	0	29	7	1771560	0.355205	1
SRI	157359	454	23	61040	15400	0	1	0	0	50	21	2044320	0.355332	1
FBLN5	333910	440	29	132200	34240	0	3	2	0	9	4	473840	0.35551	1
RAB19	359405	521	24	62920	17240	0	1	0	0	50	26	3117520	0.355718	1
TPST1	551438	412	26	106080	29760	0	2	0	0	50	26	2404560	0.35579	1
DCTN4	1015949	211	43	138520	36440	0	3	0	0	50	34	2654040	0.356248	1
PSCA	384374	412	23	33080	9520	0	1	0	0	50	33	2627800	0.356309	1
DSC2	213526	521	-12	263800	73160	0	4	1	0	50	28	2654480	0.356819	1
CS	2878071	171	46	134080	38840	0	3	0	0	30	14	1496400	0.356835	1
UBE2G2	754837	213	48	50400	12000	0	1	0	0	50	21	1848840	0.357028	1
TPST2	162211	501	-14	105080	33400	0	3	0	0	50	32	2433920	0.357132	1
MFSD5	1677275	191	49	150480	51120	0	3	0	0	27	12	1131200	0.357214	1
VCX2	30870	NaN	-19	39520	11600	0	1	0	0	50	23	2234040	0.357352	1
SLCO2A1	547213	487	21	183840	54240	0	3	1	0	50	21	1934520	0.357397	1
CCDC81	356405	283	12	193720	48080	0	2	1	0	21	6	1109120	0.35769	1
SORBS2	157889	374	-1	422480	116680	0	6	2	0	50	24	2984000	0.357821	1
VSIG2	168652	622	14	91720	29720	0	1	0	0	50	30	2219000	0.358209	1
FAM171A1	211657	716	8	249960	74400	0	6	4	0	28	10	1094040	0.358289	1
MRAP2	54672	813	-16	59800	15800	0	1	0	0	50	25	2829520	0.358724	1
CRY2	429658	271	34	178440	52560	0	4	0	0	50	28	2133640	0.358964	1
ZCCHC11	663395	394	20	482920	123560	0	8	0	0	7	1	487200	0.359013	1
GRPEL1	459652	426	70	62880	17280	0	2	0	0	50	26	2171280	0.359025	1
STRA8	425774	594	40	97280	25480	0	2	1	0	50	37	2534840	0.359171	1
CD99	NaN	NaN	NaN	56760	14520	0	3	1	0	4	1	161120	0.35931	1
RBM24	249340	560	-6	69080	21880	0	1	0	0	50	17	2309360	0.359963	1
OR13C2	147494	920	-31	89200	25520	0	1	0	0	50	26	2249120	0.36032	1
DDX58	426359	362	-12	275640	65880	0	5	1	0	50	26	2474040	0.360384	1
TRNAU1AP	831495	183	26	86520	21240	0	1	1	0	50	25	2075200	0.360424	1
COMMD7	661510	132	45	61440	14760	0	1	0	0	50	25	2135320	0.360512	1
OTX2	191584	1012	-7	83600	24640	0	1	0	0	50	17	2288400	0.361126	1
PEA15	841605	386	29	38600	10000	0	1	0	0	50	30	2139160	0.361271	1
TBC1D22B	516467	376	38	148760	39160	0	3	1	0	50	39	2307760	0.361396	1
NMT2	236087	620	23	147360	37800	0	2	1	0	50	24	2161440	0.361505	1
MYF6	27810	974	-1	68560	20120	0	1	0	0	50	17	2279800	0.361511	1
NEO1	328878	705	14	419440	120320	0	9	2	0	8	2	452160	0.361518	1
ARMC1	145894	455	4	82160	22600	0	2	0	0	14	4	420040	0.361558	1
KIAA1324L	154470	1087	-7	302880	78000	0	3	0	0	33	9	1538040	0.36158	1
TSPAN15	660613	400	40	85520	24040	0	1	0	0	50	35	2986120	0.361751	1
KLHL18	872055	242	49	164480	46840	0	5	0	0	22	22	1585080	0.362264	1
ANXA2	431518	299	14	108160	27200	0	2	0	0	44	18	1920640	0.36258	1
OXA1L	1153069	351	36	140480	42400	0	4	0	0	50	27	1990560	0.362747	1
ZNF716	NaN	NaN	NaN	144520	35480	0	2	0	0	50	60	4490040	0.363074	1
APOA4	419339	326	36	111760	32120	0	3	1	0	50	33	2376920	0.363132	1
TNFSF9	836909	212	21	67360	25640	0	2	0	0	50	29	1897400	0.363304	1
SPATA12	418332	332	46	52280	16480	0	1	0	0	50	29	2274840	0.363349	1
ACOT7	643590	176	26	132960	38760	0	3	1	0	50	29	2099200	0.363378	1
RAB8B	451708	214	44	62840	15640	0	1	0	0	50	31	1992760	0.363532	1
NSDHL	211215	NaN	5	107600	30400	0	3	0	0	50	35	2690360	0.363654	1
KCNE4	279069	585	3	47680	14360	0	1	0	0	50	36	2525360	0.363827	1
CDNF	256031	306	32	54760	14600	0	1	0	0	50	35	2208920	0.363847	1
LCNL1	1979517	188	34	45920	14440	0	1	0	0	50	41	2364760	0.364037	1
C18orf8	329604	164	60	195240	51000	0	3	0	0	26	12	1344120	0.364188	1
IQCD	417427	252	35	99320	26920	0	1	0	0	50	23	2161840	0.364195	1
MGRN1	729674	157	41	171760	49160	0	4	1	0	50	36	2495680	0.364209	1
COQ7	861035	199	8	63440	17680	0	1	0	0	50	30	2158000	0.364387	1
HEATR2	545367	390	14	235000	79400	0	7	0	0	12	5	653840	0.364595	1
CHRM5	409900	384	2	148600	43760	0	3	2	0	50	24	2192400	0.364754	1
RERGL	21334	1070	-35	60840	15480	0	1	0	0	50	22	2509800	0.365085	1
RAB6B	530925	520	25	62880	15720	0	2	1	0	6	2	218320	0.365506	1
ALKBH3	437017	676	6	85520	22120	0	2	0	0	50	33	1827520	0.365534	1
DLX2	534370	295	34	91160	28240	0	2	0	0	16	8	696240	0.365687	1
FHL3	445132	232	42	82280	21280	0	2	0	0	50	26	2014000	0.365694	1
PHTF2	246673	730	25	224880	60720	0	4	0	0	20	8	999240	0.365729	1
PRKCD	845193	192	46	201640	50240	0	8	3	0	23	22	1105040	0.36593	1
FRMD8	4112809	242	50	131240	40720	0	3	0	0	50	35	2325000	0.366099	1
ITM2B	340844	457	36	78400	20120	0	1	0	0	45	24	1966640	0.366132	1
PRR15L	1183803	203	21	29600	8320	0	1	0	0	50	35	2401440	0.366187	1
STC1	321715	555	14	71040	19680	0	1	0	0	18	7	913320	0.366223	1
CLCN6	524980	196	41	263080	61880	0	6	3	0	50	29	1810720	0.366381	1
KRAS	259193	512	16	68560	16520	0	1	0	0	50	22	2305600	0.366545	1
HRASLS2	854193	303	56	45640	14720	0	1	0	0	50	32	1856920	0.36655	1
VEGFB	1613996	257	65	59040	18960	0	4	1	0	19	20	724320	0.366827	1
RCOR3	279632	545	-1	172400	36040	0	2	0	0	50	18	2075000	0.366845	1
HSDL1	550248	435	13	94640	26440	0	2	1	0	50	27	2270520	0.366873	1
PCBD2	727517	696	49	38080	10760	0	1	0	0	50	36	2451640	0.366935	1
LYG1	386109	630	24	56960	15640	0	1	0	0	50	25	2617880	0.367223	1
SLC6A11	225460	545	30	183920	50680	0	3	1	0	50	26	2346800	0.367437	1
UROD	939872	310	20	105240	31560	0	3	0	0	3	1	257760	0.367451	1
VWA3A	577505	269	45	352360	90320	0	7	1	0	50	41	2246960	0.367774	1
RHOXF1	NaN	NaN	NaN	52880	14920	0	1	0	0	50	60	4469480	0.367803	1
PAG1	185952	441	18	124640	34120	0	2	1	0	50	26	2115880	0.367813	1
MAP2K5	449735	377	31	136760	34960	0	1	0	0	21	2	922560	0.36792	1
ALG14	275272	425	-9	61040	18760	0	1	0	0	50	26	2369320	0.368168	1
PTTG2	NaN	NaN	NaN	52960	16040	0	1	0	0	50	60	4470600	0.368196	1
SYT17	766632	275	7	135680	38680	0	8	3	0	7	6	278720	0.368249	1
HOXB9	909944	509	28	70400	20440	0	1	0	0	36	14	1599640	0.368296	1
SLC25A19	1723762	171	31	91600	26840	0	2	0	0	50	40	2197480	0.368316	1
FHDC1	227983	342	25	318520	98360	0	5	0	0	20	4	877920	0.368332	1
ACADL	190249	696	2	126000	33960	0	1	0	0	50	15	2269800	0.368455	1
KCNQ3	163210	970	-6	246640	74360	0	3	2	0	50	19	2189880	0.368675	1
KCNV1	102383	890	-18	139160	42160	0	2	1	0	50	27	2665120	0.368948	1
SIKE1	600310	596	-5	62920	15560	0	1	0	0	50	20	2352880	0.368962	1
MMP20	530118	436	17	141200	37600	0	2	0	0	50	21	1970440	0.36904	1
GTF3C6	320358	372	33	64760	14920	0	1	0	0	50	27	2240680	0.369387	1
RDH13	1125216	432	-26	93440	28960	0	2	1	0	11	5	590920	0.369421	1
TMEM106B	114769	532	-9	81280	21080	0	2	0	0	50	37	2522640	0.369644	1
BCL6B	1696302	360	24	134360	42280	0	4	0	0	11	2	341600	0.369714	1
GSG1	692979	203	5	125880	23880	0	2	1	0	50	31	2389480	0.36993	1
YIPF5	39627	428	1	75400	19880	0	1	0	0	50	20	2305800	0.370092	1
FGF23	295315	860	33	70520	21160	0	1	1	0	50	14	1925440	0.370452	1
SLC25A22	1788356	193	48	91200	29280	0	3	0	0	50	39	2152480	0.370669	1
SLC23A2	476336	464	37	186360	54720	0	2	0	0	20	4	734400	0.370671	1
TRIM35	353563	561	8	139760	40720	0	3	1	0	38	19	1750400	0.370763	1
PCGF1	1019591	315	50	78200	19720	0	2	0	0	12	8	508280	0.370857	1
FCHSD1	771583	353	25	198480	59640	0	6	0	0	5	2	372680	0.371203	1
CCDC126	389945	361	23	40080	11160	0	1	0	0	50	25	2330800	0.37136	1
TMEM88	2148615	337	24	41640	16680	0	2	0	0	50	54	3145600	0.371586	1
LRRC8B	360067	647	5	226480	63920	0	6	2	0	50	43	2495520	0.371613	1
SPG21	705779	185	57	91560	23520	0	2	1	0	50	43	2269000	0.371725	1
FBXO45	1149194	156	30	79560	24720	0	2	0	0	50	31	2155840	0.371818	1
CYP11A1	641004	222	46	149720	42040	0	2	0	0	50	30	2547360	0.371894	1
AKR1B10	403585	319	21	94240	24200	0	1	0	0	50	16	2593760	0.372274	1
MFAP2	678965	221	52	56520	13560	0	2	0	0	50	42	2355000	0.37292	1
VASH2	315884	412	12	102800	28240	0	2	0	0	11	8	642720	0.37321	1
NENF	416515	283	18	48040	15920	0	1	0	0	50	26	2239840	0.373541	1
RAB37	929990	484	15	94080	26520	0	3	0	0	50	35	1911640	0.373547	1
FAM3B	224593	506	24	70440	17880	0	1	0	0	50	19	2238000	0.373726	1
FAM181A	242993	645	15	97240	31040	0	2	0	0	43	31	2828440	0.373736	1
FAS	187494	375	39	101080	24200	0	1	0	0	50	13	2122880	0.373856	1
NEUROG3	824126	519	31	57280	20480	0	1	0	0	50	34	2409400	0.373877	1
OR4C12	11630	1171	-38	86520	25560	0	1	0	0	50	21	2364880	0.37398	1
MORC3	281776	347	63	278160	68160	0	5	3	0	50	30	2126040	0.374031	1
KNCN	608423	266	25	28680	9000	0	1	0	0	50	33	2140160	0.37435	1
SGSM1	365627	308	-21	335360	90280	0	5	1	0	50	29	2543800	0.374518	1
KIF6	77217	940	26	243280	60920	0	2	0	0	40	14	1937120	0.374605	1
TRIP10	736129	272	27	161320	41720	0	4	0	0	36	28	2041360	0.374856	1
CLCN5	75681	NaN	26	233720	66160	0	3	2	0	48	29	2184880	0.375006	1
KCNS2	440962	550	28	133440	39120	0	5	2	0	35	26	1261800	0.37521	1
PLAGL2	1071799	262	51	137040	42360	0	4	0	0	7	1	223600	0.375217	1
ZNF488	117080	445	21	91760	31000	0	2	1	0	50	17	2282640	0.375307	1
ISG20	393645	605	14	50960	16000	0	1	0	0	50	34	2466480	0.375482	1
C10orf2	1020226	247	40	191160	59400	0	6	2	0	50	37	2265160	0.375529	1
TNC	194891	374	0	625760	179440	0	11	4	0	50	25	2788320	0.375599	1
LZTFL1	252915	426	42	90320	22000	0	1	0	0	50	22	2558280	0.375623	1
ADAM23	290387	726	16	248720	63160	0	3	0	0	26	8	1255680	0.37571	1
ZNF44	1474345	671	-10	193920	47040	0	5	0	0	20	12	801720	0.375775	1
ZFAND3	303392	630	32	66920	17560	0	2	1	0	14	7	466440	0.376183	1
C11orf82	307255	371	0	286280	75280	0	2	0	0	31	7	1574360	0.376265	1
ZNF331	605686	808	-54	136160	32320	0	3	0	0	50	33	1916120	0.376267	1
PEBP1	637549	608	17	54040	15080	0	1	0	0	50	29	2141640	0.376534	1
UCK1	609539	272	36	83240	19960	0	1	0	0	50	22	2458440	0.376563	1
NBL1	775439	271	32	62120	17680	0	2	1	0	50	49	2457960	0.376644	1
RASGRP1	97743	604	-5	232160	62800	0	2	0	0	50	14	2579800	0.376872	1
OR1G1	445889	579	-8	86800	26240	0	1	0	0	20	3	679040	0.376892	1
RNASE3	1070609	561	16	44840	13600	0	2	0	0	50	31	1984840	0.376931	1
ANKRD39	822597	392	46	51880	16040	0	1	0	0	50	43	3107480	0.377055	1
STOM	580458	388	39	82960	24200	0	2	0	0	50	35	2534720	0.377145	1
CCR6	149346	696	40	105800	30160	0	1	1	0	33	8	1381560	0.377194	1
ZHX2	426706	533	13	233480	68680	0	8	4	0	14	6	477000	0.377327	1
DDX47	742991	129	27	132120	37560	0	2	0	0	50	31	2506200	0.37738	1
TFCP2	530649	155	40	150520	37280	0	2	0	0	50	19	2000520	0.377541	1
FBXO30	77282	736	0	211560	57960	0	2	0	0	21	4	1071400	0.377886	1
LDOC1L	216551	425	14	63760	22640	0	2	0	0	50	31	2435520	0.377952	1
NKRF	663615	NaN	48	200680	54920	0	3	0	0	16	4	732560	0.378065	1
LEPROTL1	387693	231	51	59200	17720	0	1	0	0	50	25	2149320	0.378081	1
SCG5	244857	383	1	62360	16720	0	1	0	0	50	27	2964040	0.378088	1
MPZL1	546300	319	16	77600	22000	0	1	0	0	50	24	2355240	0.378105	1
OPRM1	44509	878	0	206600	57160	0	3	1	0	14	8	883680	0.378109	1
USP3	617922	178	42	156160	38120	0	2	0	0	50	19	2472840	0.378164	1
DCPS	367696	426	30	96080	28000	0	2	0	0	50	32	2778120	0.378244	1
ZAR1L	NaN	NaN	NaN	91680	25920	0	2	1	0	50	61	4480480	0.378289	1
RAD54L2	647863	387	39	416880	121680	0	5	1	0	36	19	2250280	0.378453	1
CHIC1	319167	NaN	11	66360	17040	0	1	0	0	50	32	2603160	0.378722	1
SP6	1071489	214	29	102960	33240	0	2	0	0	50	34	2117960	0.378782	1
CIAO1	904852	213	43	98400	26880	0	2	1	0	25	21	1171720	0.378857	1
MMAB	436841	428	38	73640	20800	0	2	0	0	50	37	2356400	0.378875	1
AMIGO2	150007	380	-12	145240	43520	0	2	0	0	50	21	2538280	0.378898	1
ANAPC10	182708	1139	20	54960	13920	0	1	0	0	50	31	2416400	0.379072	1
DNAJB7	NaN	NaN	NaN	89360	22240	0	1	0	0	50	60	4476800	0.379388	1
STK39	135182	980	-1	161960	42760	0	3	2	0	26	10	1161240	0.37993	1
SLC22A13	301168	437	22	154960	48320	0	3	1	0	50	45	2498760	0.380008	1
HADHB	642780	250	34	139080	39120	0	3	0	0	50	26	1993400	0.380213	1
ATXN7	156786	683	8	272400	81840	0	3	2	0	50	20	3110120	0.380598	1
NGF	537568	558	6	67160	20440	0	2	0	0	50	58	2921480	0.380836	1
DSTN	568191	347	-5	49160	12040	0	1	0	0	50	26	2236120	0.380959	1
TMEM116	816439	317	43	72160	19760	0	1	0	0	50	37	2362360	0.381088	1
DUXA	311003	924	-64	61520	14920	0	1	0	0	50	39	2113240	0.381109	1
DKK2	48475	1014	-18	74560	20480	0	1	0	0	50	21	2295720	0.381332	1
TNF	2517285	220	35	65320	20360	0	2	0	0	50	43	2452240	0.381502	1
NPHP1	NaN	NaN	NaN	217440	56160	0	3	0	0	50	60	4510720	0.381558	1
AKAP1	413131	258	-6	253880	76360	0	5	2	0	50	37	2731120	0.381669	1
HRASLS	141065	851	-4	48720	13320	0	1	0	0	50	25	2132560	0.381792	1
P2RY1	224331	861	8	103520	31120	0	2	1	0	46	22	2000560	0.381892	1
CCDC27	249153	341	24	191640	50400	0	2	2	0	32	10	1309080	0.381989	1
CUL5	421044	572	14	234360	55440	0	3	1	0	50	22	2176840	0.382012	1
OR10G7	158396	830	-10	84480	27840	0	1	1	0	44	18	2265920	0.382633	1
CENPM	1335011	323	67	55920	16680	0	1	0	0	50	26	1797680	0.382694	1
OR13C3	146816	930	-33	96520	28760	0	1	1	0	50	20	2017520	0.382853	1
DZIP1	229772	438	45	257960	63640	0	6	1	0	30	20	1528640	0.38288	1
A1CF	113129	613	19	183360	51600	0	2	0	0	50	16	2260600	0.382927	1
GRK7	426724	406	30	156960	43920	0	4	2	0	15	4	492480	0.382927	1
ZNF808	546511	1005	-53	261640	65240	0	6	1	0	40	23	1759160	0.382929	1
ASAP2	661229	340	34	296760	78720	0	5	1	0	46	37	3081640	0.382944	1
SCN3B	681725	451	6	63640	17000	0	2	0	0	50	34	2125920	0.382961	1
MYO5B	276079	530	40	543600	140760	0	11	2	0	31	10	1110720	0.38322	1
FAM122A	NaN	NaN	NaN	79120	24560	0	1	0	0	50	60	4479120	0.383284	1
OSGEPL1	398590	452	25	119400	33840	0	1	0	0	50	26	2943840	0.383358	1
POLM	1151124	282	56	139600	43640	0	2	0	0	16	9	667160	0.383452	1
PRDM8	60915	903	-4	188360	61480	0	2	1	0	48	31	2231400	0.383622	1
ACOT8	742720	180	48	93160	26240	0	2	1	0	50	25	1730840	0.383631	1
NAA11	103025	821	-5	65920	17360	0	1	0	0	50	19	2026560	0.383827	1
MYL2	907625	570	47	51360	11880	0	1	0	0	50	41	2880040	0.383878	1
CLDN2	148608	NaN	22	62600	20560	0	1	1	0	44	13	1533440	0.384277	1
CDH22	553454	583	44	229960	73280	0	4	1	0	47	37	2299800	0.384297	1
DCK	267678	690	22	78520	18320	0	1	0	0	50	48	5624240	0.384332	1
SP3	296444	376	27	218720	65680	0	2	0	0	50	13	2491760	0.384381	1
OXSR1	301294	386	31	156240	42000	0	2	0	0	50	28	2491920	0.384552	1
ARID3A	2292363	206	44	165080	52120	0	3	0	0	50	36	2263960	0.384554	1
TAC4	1152179	238	30	33680	9280	0	1	0	0	50	50	2267720	0.385001	1
APOL3	1228837	331	13	111640	34640	0	3	0	0	50	57	2508040	0.385156	1
HIST3H3	626588	351	7	37080	12480	0	1	0	0	50	59	3219160	0.385555	1
ZNF141	427337	756	5	139680	33000	0	3	0	0	39	24	2189200	0.385917	1
NRBF2	219747	715	8	83360	21760	0	1	0	0	50	20	2423240	0.386056	1
NDUFB8	1153157	264	50	55760	13960	0	1	0	0	50	30	2325760	0.38634	1
NIPSNAP3B	194451	718	-21	72800	19120	0	1	0	0	31	9	1314360	0.386578	1
PDGFC	39685	595	-24	99920	27040	0	2	0	0	50	36	2184320	0.386877	1
DDHD1	306643	448	20	260720	72400	0	5	0	0	25	16	1378480	0.386903	1
EDARADD	482656	589	11	68040	16320	0	1	0	0	50	41	2449360	0.387039	1
ANTXR2	62176	905	6	147160	41600	0	2	0	0	33	10	1544880	0.387229	1
AGMAT	656850	162	31	97840	32120	0	2	0	0	6	0	232160	0.387303	1
TNR	177437	738	4	388840	110480	0	8	2	0	32	14	1649840	0.387423	1
STARD10	529647	207	50	84520	23000	0	2	1	0	50	29	2098280	0.387508	1
SLC22A18AS	552601	256	34	69920	22960	0	1	0	0	50	41	2405680	0.387518	1
ZNF511	386585	472	13	73480	20480	0	1	1	0	17	5	738280	0.387585	1
TMEM216	1394229	286	57	43240	12800	0	1	0	0	50	34	2013600	0.387789	1
ZNF280B	201933	683	23	155280	41040	0	3	2	0	24	17	1028360	0.387895	1
NDUFS2	728669	234	37	137040	38400	0	2	0	0	50	18	2531280	0.388068	1
FOXM1	495532	443	28	225200	67840	0	4	1	0	36	27	1750960	0.388072	1
CCDC154	NaN	NaN	NaN	190840	57560	0	3	0	0	50	60	4512120	0.388293	1
INSL4	372067	616	20	39080	12040	0	1	1	0	8	4	274520	0.388299	1
LIMD1	340032	231	45	189520	57800	0	4	2	0	50	26	1963520	0.388402	1
BBS10	563668	507	-10	203960	57400	0	2	0	0	50	14	2207200	0.388626	1
TALDO1	1788356	193	48	98480	26800	0	2	0	0	50	39	2152480	0.388665	1
DNASE1L2	2179404	224	39	84960	25920	0	2	0	0	50	30	2194080	0.388745	1
ZNF133	575071	471	-1	186240	51120	0	3	3	0	50	16	1968480	0.389353	1
ITIH3	1193949	272	49	261800	69280	0	3	1	0	24	9	1102400	0.389521	1
PGAP2	425863	258	23	119440	18680	0	3	1	0	43	21	1786200	0.389603	1
MAP4K3	363056	435	10	272280	66000	0	2	0	0	33	8	1622840	0.389636	1
OR56B1	139577	922	2	89240	27760	0	1	0	0	8	0	360240	0.389769	1
ILVBL	703673	419	1	177560	57520	0	4	3	0	50	29	1987200	0.389777	1
PRLHR	613868	617	8	98200	35840	0	2	0	0	50	28	2213200	0.389779	1
C10orf120	321415	530	1	97440	24960	0	1	0	0	40	23	2169320	0.390258	1
FAM53A	902379	350	33	109160	35920	0	4	3	0	16	11	764240	0.390263	1
C9orf50	886775	205	39	118560	39840	0	2	1	0	50	47	2350960	0.390269	1
GOLT1A	557652	370	34	38320	11480	0	1	0	0	50	30	2475480	0.390593	1
GABRQ	203033	NaN	-1	182080	50120	0	2	0	0	50	27	2678760	0.390753	1
ZBTB7B	1612870	224	35	147440	47920	0	5	0	0	19	11	871720	0.390837	1
SLC18A3	118787	312	32	140320	51560	0	2	2	0	50	21	2346960	0.390848	1
CYP2D6	1296288	363	43	139040	44560	0	3	1	0	50	42	2571840	0.390998	1
EGFR	423489	336	-13	379640	100240	0	7	4	0	50	23	2161240	0.391083	1
CDK17	248700	405	26	159920	40720	0	2	0	0	50	13	2246400	0.391113	1
CHST14	888588	192	47	101160	34560	0	1	0	0	5	1	554360	0.391535	1
ESYT1	2878044	171	40	319640	96160	0	6	2	0	50	29	2328720	0.391688	1
SLC17A5	713348	132	31	142560	40800	0	3	1	0	37	23	1703040	0.391727	1
ST6GALNAC6	1278941	201	51	95400	27720	0	3	0	0	50	37	2506720	0.39175	1
KIF3C	597475	166	40	224040	65160	0	2	0	0	49	17	2457240	0.391882	1
ZC3H7B	1354493	173	58	284360	78280	0	6	4	0	50	29	2162040	0.391911	1
RNF187	NaN	NaN	NaN	65960	20440	0	1	0	0	50	60	4475000	0.391989	1
ZNF774	1110178	139	33	140840	34840	0	2	0	0	50	22	2251840	0.392117	1
MC3R	254407	729	-58	90080	26560	0	2	1	0	12	8	740360	0.392173	1
NTN1	128482	632	-7	172200	48480	0	1	0	0	50	11	2984560	0.392219	1
HSPB3	61471	617	14	41600	12760	0	1	1	0	47	29	2014840	0.392318	1
ZNF445	366436	418	42	296760	77160	0	6	0	0	15	10	1028360	0.392478	1
OR52N5	139577	922	2	90120	27360	0	1	0	0	8	0	360240	0.392725	1
CXADR	100910	366	-17	105520	29120	0	1	0	0	50	16	2162640	0.392814	1
TMPRSS11B	170820	716	-19	123320	31120	0	1	0	0	31	10	1437400	0.393208	1
GGCX	1241734	170	39	217400	62560	0	4	0	0	15	8	838040	0.393269	1
MAPK14	892075	407	36	124800	26880	0	3	1	0	50	33	2040400	0.393339	1
HIATL1	229346	486	34	145040	42760	0	3	2	0	50	36	2346840	0.393354	1
TIFAB	625030	509	47	43600	15200	0	1	0	0	50	55	2712200	0.393441	1
DNAJB9	171249	838	6	66040	15560	0	1	0	0	50	18	2073800	0.393647	1
CTPS2	295447	NaN	30	175000	44960	0	2	0	0	15	5	856800	0.393652	1
NODAL	550900	338	42	97440	29040	0	2	0	0	50	30	2096920	0.394173	1
CACNA1B	286606	675	29	667120	196880	0	9	5	0	50	19	2624440	0.394446	1
PTPRA	807310	396	46	236520	62640	0	7	2	0	21	21	1133800	0.394531	1
CCL24	1013258	255	46	34480	9440	0	1	0	0	50	62	2765120	0.394615	1
PDLIM4	451605	191	40	95120	27160	0	2	1	0	50	32	2100240	0.394646	1
GRIN3A	111816	1063	-27	314440	91160	0	3	1	0	6	1	695760	0.394904	1
EEF1A2	1262904	298	54	131920	38480	0	4	1	0	50	34	2113240	0.394922	1
TRIM27	161027	558	30	148120	40280	0	1	0	0	43	14	2228160	0.395076	1
CLN6	376180	365	33	89040	26160	0	1	0	0	50	15	1965920	0.395448	1
CSNK1D	2856070	193	24	123200	35080	0	5	2	0	27	28	1156280	0.39549	1
NOX3	108543	628	13	166240	44960	0	2	0	0	50	27	2405440	0.39564	1
HHIPL1	375738	250	21	227200	70640	0	3	2	0	50	21	2415160	0.39566	1
SFRP4	100826	683	10	100680	26640	0	1	0	0	37	16	2344800	0.395731	1
ORM1	206775	425	4	59880	15240	0	1	1	0	43	13	1780280	0.396085	1
ADRA2A	285613	547	-1	124800	42960	0	3	3	0	14	5	470120	0.396206	1
PRH2	NaN	NaN	NaN	47160	14760	0	1	0	0	50	60	4469320	0.396496	1
CDC37	1956832	207	38	112920	26880	0	2	0	0	50	50	2640160	0.397064	1
LILRA6	717623	458	-6	135960	40920	0	3	2	0	50	39	2025640	0.39714	1
KIF5A	1347795	303	44	305800	79520	0	5	0	0	5	0	283200	0.397336	1
ZNF436	1032187	163	25	137360	33640	0	3	1	0	30	30	1586480	0.397451	1
ATP5SL	1104034	376	38	82320	18000	0	3	0	0	50	30	1976400	0.397587	1
TPMT	487819	397	-1	74640	17760	0	1	0	0	50	19	2195960	0.397606	1
RAMP1	571081	382	23	42000	12600	0	1	1	0	14	12	731720	0.39767	1
PSMC4	1335888	522	35	122760	33120	0	5	0	0	48	81	3084800	0.397758	1
HNRNPUL1	1186597	214	24	246880	68360	0	5	0	0	11	4	531720	0.397868	1
REG1A	10958	1389	-22	50480	12040	0	1	0	0	50	29	1969520	0.398005	1
EVI2A	NaN	NaN	NaN	73760	20800	0	1	0	0	50	60	4475360	0.398226	1
NDUFB7	1008795	204	26	40280	10840	0	1	0	0	50	44	2308640	0.398254	1
ETFDH	171388	429	1	179600	48640	0	2	1	0	50	22	2414800	0.398306	1
SS18L1	861466	288	-13	117920	30040	0	5	0	0	50	39	2161920	0.398338	1
ALDH8A1	152922	364	19	139160	39640	0	3	1	0	50	31	2195800	0.398359	1
GFI1	370328	580	1	119040	36120	0	2	1	0	50	35	2537000	0.398398	1
TAGLN3	262689	336	14	59160	14760	0	1	0	0	50	38	2200920	0.398449	1
GNB1	1492510	229	26	100000	27560	0	2	1	0	50	25	2118360	0.398641	1
SNRPN	NaN	NaN	NaN	67280	22360	0	1	0	0	50	60	4476920	0.398786	1
KCNK9	62115	562	5	105280	30680	0	2	2	0	7	3	324800	0.398897	1
OSTM1	303865	459	38	96320	26920	0	1	0	0	50	13	1869120	0.398982	1
RNF185	699351	218	41	56920	15440	0	1	0	0	50	28	2612360	0.399019	1
PPIL1	836025	244	43	48600	12960	0	1	0	0	50	37	2601280	0.399149	1
CELF1	1011926	219	40	153080	39040	0	2	0	0	50	35	2676080	0.39924	1
KIFC1	1441897	236	31	187520	59920	0	7	0	0	12	10	607920	0.399298	1
OR5T3	10317	969	-43	95040	27600	0	1	0	0	50	18	2111040	0.399335	1
ARHGAP12	359237	346	25	251000	62560	0	3	1	0	50	27	2616080	0.399439	1
MC4R	44259	929	3	93320	26800	0	1	0	0	28	14	1679760	0.399492	1
BCO2	389593	362	2	169040	45040	0	3	0	0	24	7	856360	0.399521	1
SLC7A8	1257542	168	41	151560	46200	0	2	0	0	21	8	1054040	0.399592	1
CRYBG3	123806	723	0	300360	76800	0	3	0	0	22	5	1005280	0.399777	1
IRF3	1733181	195	36	120920	36760	0	3	0	0	50	40	2552040	0.400017	1
GNA14	180930	608	-10	104560	26480	0	1	1	0	50	19	2781840	0.400298	1
B3GNT6	368988	395	37	103680	35520	0	1	0	0	24	8	1375400	0.400436	1
CCDC155	2178574	290	37	163720	48080	0	3	1	0	50	40	2416120	0.400455	1
HSD17B11	502611	417	16	86240	25000	0	1	0	0	50	16	1979520	0.400463	1
UBE2F	507348	433	27	57120	14160	0	1	0	0	50	34	2558120	0.400527	1
ZNF823	904926	521	-1	177920	43480	0	5	1	0	27	12	871800	0.40056	1
COMMD9	222571	248	-8	57320	16960	0	1	0	0	50	30	2515640	0.400649	1
TOLLIP	1373249	311	46	78800	22600	0	2	0	0	50	64	3324480	0.400898	1
NUF2	130027	852	-9	141360	32280	0	2	0	0	50	32	3158880	0.400927	1
PSD4	630071	479	37	299400	88320	0	6	1	0	50	42	2826560	0.401171	1
SDCBP2	417756	427	36	84120	25200	0	2	0	0	38	26	1906240	0.401265	1
COPA	939853	358	27	361360	98240	0	4	0	0	9	0	430480	0.401272	1
SPN	NaN	NaN	NaN	104920	39920	0	2	0	0	50	60	4494480	0.401379	1
AQP9	242649	602	4	83800	25160	0	1	0	0	50	28	2026560	0.401471	1
PSMA6	452722	188	40	72880	18920	0	1	0	0	50	33	2013600	0.401527	1
FRG1	49764	1059	-15	79360	17960	0	63	4	0	1	4	25400	0.401653	1
OR4D9	430021	507	-1	86200	26960	0	1	0	0	50	20	2386640	0.401854	1
ROBO1	72749	790	-19	482080	135440	0	10	0	0	29	14	1365200	0.402126	1
CD86	557964	715	39	97720	23960	0	2	1	0	45	30	1787160	0.402632	1
OR6V1	314565	676	-1	85600	27320	0	1	0	0	50	18	1882280	0.402838	1
TNNT1	1036976	266	-1	86200	20480	0	2	0	0	50	27	1656320	0.402998	1
CHAD	1332860	200	23	100040	31240	0	1	0	0	50	33	2716680	0.403171	1
NOTUM	3814891	211	28	142360	41360	0	5	1	0	50	38	2005080	0.403583	1
CTRB2	612638	171	16	75560	22840	0	1	0	0	50	17	2184680	0.403809	1
MDM1	354120	575	16	223960	59960	0	1	1	0	50	12	3131640	0.403882	1
SETD3	340080	429	-11	177920	47320	0	4	2	0	33	23	1553400	0.403969	1
ELMOD2	125708	752	7	90040	19640	0	1	0	0	50	22	2692440	0.40406	1
NUP43	425807	234	39	111000	29760	0	2	0	0	50	14	1971520	0.404103	1
C11orf1	437513	221	22	45240	10560	0	1	0	0	50	22	2096680	0.404121	1
PRF1	549339	573	40	152280	49320	0	2	0	0	50	34	2650000	0.404287	1
HNRNPC	730651	357	37	90320	23560	0	2	1	0	50	36	2646640	0.40439	1
UPF2	353958	125	28	377320	91040	0	4	0	0	12	2	840600	0.404435	1
NFE2	753625	205	59	101920	33680	0	2	0	0	47	36	2111680	0.40451	1
LNP1	376655	410	13	52840	13040	0	1	0	0	50	34	2848800	0.404793	1
C7orf26	NaN	NaN	NaN	125800	38600	0	3	1	0	50	61	4493160	0.404831	1
TSPAN31	1160849	344	39	61400	16960	0	1	0	0	50	36	2266920	0.405121	1
TPRX1	881316	336	39	107840	41200	0	4	0	0	6	5	257960	0.405202	1
PIK3CB	281611	424	26	314760	80640	0	4	0	0	14	2	553440	0.405298	1
LBX1	572649	418	43	77000	25000	0	1	0	0	50	31	2717000	0.405343	1
GPS1	3850694	197	34	157560	44160	0	5	3	0	20	14	909200	0.405431	1
GMPR	117199	561	26	100120	28280	0	2	0	0	50	16	2262720	0.40556	1
PAPPA	69253	553	-19	466080	130080	0	6	4	0	37	20	1787760	0.405587	1
C6orf141	NaN	NaN	NaN	65640	22560	0	1	0	0	50	60	4477120	0.405626	1
LHFPL2	214373	434	44	64000	18920	0	1	0	0	50	33	2745760	0.405654	1
TIGD2	147602	529	24	150000	39360	0	2	0	0	24	7	980480	0.405709	1
EXOSC4	2720766	211	27	66640	23120	0	3	1	0	25	30	1157200	0.40572	1
ACTL8	249962	416	27	102200	30880	0	1	0	0	50	16	2308600	0.405721	1
GOT1	277366	575	-5	118880	34000	0	1	0	0	50	18	2060880	0.405806	1
PITX2	64585	758	-15	109800	31440	0	1	0	0	23	8	1313720	0.405818	1
CLDN16	163494	373	9	86800	25280	0	1	0	0	50	23	2338280	0.406202	1
NUDT9	530607	537	23	102960	26760	0	2	0	0	50	20	1983280	0.406257	1
ARVCF	616246	217	37	266680	88640	0	6	2	0	50	37	2556520	0.406575	1
TAS2R50	365490	676	-2	84560	23920	0	2	0	0	50	17	2005680	0.406607	1
PPM1G	1244404	179	39	158960	42280	0	3	0	0	12	4	607960	0.406684	1
IFI44L	161560	636	-13	132800	34120	0	1	0	0	43	10	2043080	0.406742	1
FAM107A	534993	383	31	41960	11680	0	1	0	0	5	1	240560	0.406751	1
LAYN	418517	326	21	108840	29040	0	1	0	0	50	18	2363840	0.407173	1
EPGN	172790	402	18	39720	10200	0	1	0	0	50	32	2007480	0.407409	1
AK7	328475	560	14	215080	53960	0	2	0	0	24	7	1171480	0.407409	1
TMEM169	603452	419	35	83880	23880	0	1	1	0	34	15	1561520	0.407492	1
C16orf54	NaN	NaN	NaN	59880	21360	0	1	0	0	50	60	4475920	0.407558	1
TIGD6	1070181	149	44	148280	40120	0	3	0	0	27	19	1505080	0.407567	1
ADRBK1	1369264	177	44	204800	53200	0	5	1	0	44	34	2111920	0.407592	1
CNKSR2	90158	NaN	-2	304760	78760	0	2	0	0	12	1	835240	0.407814	1
CIRBP	2214581	234	29	51120	14040	0	1	0	0	37	44	1785880	0.408052	1
DDX41	1120311	347	41	182440	49760	0	4	0	0	3	0	214200	0.408061	1
CFL1	3779084	287	42	48760	12800	0	2	1	0	14	7	527120	0.408302	1
AKT3	208930	954	-4	149440	35360	0	2	0	0	50	24	2266720	0.408384	1
MAPK3	NaN	NaN	NaN	113880	33600	0	2	1	0	50	61	4488160	0.408386	1
FOXE1	468629	276	38	98720	35920	0	1	0	0	50	16	2210320	0.408651	1
FTMT	70878	920	-16	67120	20600	0	1	0	0	50	16	2298040	0.40877	1
RXRA	300063	295	42	132560	38440	0	4	2	0	29	14	1155680	0.408818	1
RASD2	378214	227	-30	76040	21040	0	3	1	0	6	2	239160	0.408845	1
PRKRA	159623	482	29	95560	24440	0	1	1	0	41	27	2138520	0.408852	1
MLLT3	85091	575	14	169720	39920	0	2	0	0	50	27	2529600	0.408974	1
TRPM1	277407	497	28	465480	124440	0	5	0	0	29	6	1367560	0.409013	1
FSTL3	1832767	218	10	74560	22640	0	2	0	0	29	44	1910640	0.409129	1
TMED3	259115	736	19	61640	18040	0	1	0	0	50	31	2712880	0.409439	1
ZNF503	173705	547	13	170280	63120	0	2	0	0	41	19	2111000	0.409672	1
MAP2K6	58848	397	-42	100000	25880	0	1	0	0	50	23	2371680	0.409815	1
WNT11	265144	359	38	99920	29800	0	1	0	0	50	17	2051760	0.409828	1
PEX11A	880974	190	35	69880	20600	0	2	0	0	50	46	2504080	0.409889	1
OR9A4	198115	856	-6	87400	26000	0	1	0	0	50	20	2360360	0.410096	1
ANXA5	311234	440	9	95720	25600	0	1	0	0	50	17	2245800	0.410217	1
BLNK	817052	804	34	136480	35720	0	2	1	0	50	34	2397880	0.410267	1
MAP2K4	45834	583	-52	118520	30520	0	6	0	0	2	0	104960	0.41035	1
HNF4G	47353	914	7	132080	33040	0	1	0	0	18	3	927440	0.41055	1
SOS2	778308	166	46	389120	101560	0	5	0	0	42	23	1892480	0.410606	1
NSMCE4A	249185	396	25	113520	30480	0	1	0	0	50	12	2389640	0.410646	1
PREPL	433205	522	29	215480	53440	0	3	0	0	18	4	671160	0.411079	1
CAPG	1067736	180	39	101360	28600	0	3	0	0	50	40	2656400	0.411193	1
UCK2	321876	403	1	76800	20400	0	1	1	0	45	20	2066800	0.411271	1
EBF4	NaN	NaN	NaN	171640	52160	0	3	0	0	50	60	4506720	0.41138	1
SLC22A10	1307417	572	17	153440	46000	0	2	0	0	27	8	986680	0.411432	1
HCFC2	1209623	156	26	228560	63760	0	4	1	0	50	44	2476840	0.411499	1
ZNF227	618477	671	-31	234040	55880	0	3	1	0	50	23	2029760	0.411547	1
SIRPB2	397239	386	42	96800	28600	0	1	0	0	50	29	2549360	0.411569	1
HTATIP2	168576	547	-6	89000	26200	0	1	0	0	50	15	2253000	0.411664	1
MRRF	319049	597	19	78160	19400	0	1	0	0	50	22	2768640	0.411675	1
DCTN5	544239	561	38	54400	14120	0	1	0	0	50	35	2657320	0.411988	1
ERMAP	811934	327	28	135880	40280	0	2	0	0	50	41	2534440	0.412005	1
ASB15	86799	644	-7	169320	47040	0	3	0	0	14	3	578960	0.412041	1
HLA-DPA1	1479000	431	28	74760	21360	0	2	0	0	50	37	2011560	0.412251	1
MGAT1	830596	566	25	121240	39320	0	6	2	0	6	4	279120	0.412333	1
AVL9	371440	595	10	188960	51880	0	6	0	0	38	25	1903200	0.412554	1
PCDHGA12	NaN	NaN	NaN	258920	82600	0	4	2	0	50	62	4537160	0.412568	1
C1orf51	1213150	197	38	107640	33240	0	3	0	0	41	32	1858840	0.412928	1
DSG1	255599	412	15	300040	84680	0	5	1	0	23	8	1045200	0.413049	1
NAGPA	635794	302	9	145760	44560	0	2	0	0	50	37	3002040	0.41319	1
DLEC1	310440	411	28	526160	146680	0	9	2	0	50	25	2882960	0.413256	1
PEX2	66156	757	2	87320	23320	0	1	0	0	17	4	820240	0.413265	1
MAP3K9	247989	426	43	313920	94680	0	5	1	0	27	9	1342680	0.413375	1
PI4K2B	218037	523	28	141240	36600	0	1	1	0	44	11	2013800	0.413625	1
[truncated: 16,863 more rows]
