# Supplementary material for: Analysis of matched primary and recurrent BRCA1/2 mutation-associated tumors identifies recurrence-specific drivers
Source: Research Square preprint supplement (doi:10.21203/rs.3.rs-745248/v1), 2021-08-30
Supplement: Supplementary file 12 [file 55f850c091b5719089ff9e37.xlsx]

## Sheet: PrimaryTumor_LOFMutations_GSEA
NAME	GS<br> follow link to MSigDB	GS DETAILS	SIZE	ES	NES	NOM p-val	FDR q-val	FWER p-val	RANK AT MAX	LEADING EDGE
HALLMARK_EPITHELIAL_MESENCHYMAL_TRANSITION	HALLMARK_EPITHELIAL_MESENCHYMAL_TRANSITION	Details ...	63	0.495722	2.06948	0	0.00709302	0.007	1094	tags=49%, list=25%, signal=64%
HALLMARK_MITOTIC_SPINDLE	HALLMARK_MITOTIC_SPINDLE	Details ...	82	0.435203	1.85952	0	0.0509528	0.098	1115	tags=43%, list=25%, signal=56%
HALLMARK_HYPOXIA	HALLMARK_HYPOXIA	Details ...	59	0.414147	1.73752	0.00202634	0.0836144	0.28	1107	tags=44%, list=25%, signal=58%
HALLMARK_DNA_REPAIR	HALLMARK_DNA_REPAIR	Details ...	34	0.436757	1.70701	0.0115911	0.0897316	0.368	770	tags=29%, list=17%, signal=35%
HALLMARK_UV_RESPONSE_DN	HALLMARK_UV_RESPONSE_DN	Details ...	64	0.411768	1.75822	0.00404858	0.0979755	0.253	952	tags=41%, list=21%, signal=51%
HALLMARK_G2M_CHECKPOINT	HALLMARK_G2M_CHECKPOINT	Details ...	56	0.395862	1.64462	0.0161453	0.127389	0.538	1075	tags=38%, list=24%, signal=49%
HALLMARK_WNT_BETA_CATENIN_SIGNALING	HALLMARK_WNT_BETA_CATENIN_SIGNALING	Details ...	25	0.445777	1.59477	0.0456026	0.159328	0.676	199	tags=12%, list=4%, signal=12%
HALLMARK_MYOGENESIS	HALLMARK_MYOGENESIS	Details ...	76	0.361699	1.5524	0.0210843	0.191151	0.786	1214	tags=39%, list=27%, signal=53%
HALLMARK_ESTROGEN_RESPONSE_EARLY	HALLMARK_ESTROGEN_RESPONSE_EARLY	Details ...	73	0.33729	1.45965	0.0592369	0.265416	0.943	1117	tags=36%, list=25%, signal=47%
HALLMARK_P53_PATHWAY	HALLMARK_P53_PATHWAY	Details ...	48	0.355211	1.44409	0.0747951	0.266895	0.957	1072	tags=29%, list=24%, signal=38%
HALLMARK_APICAL_JUNCTION	HALLMARK_APICAL_JUNCTION	Details ...	78	0.344699	1.48864	0.026026	0.267008	0.908	1125	tags=37%, list=25%, signal=49%
HALLMARK_E2F_TARGETS	HALLMARK_E2F_TARGETS	Details ...	61	0.347594	1.47294	0.0489297	0.268047	0.927	1078	tags=30%, list=24%, signal=38%
HALLMARK_OXIDATIVE_PHOSPHORYLATION	HALLMARK_OXIDATIVE_PHOSPHORYLATION	Details ...	59	0.334682	1.39943	0.0877016	0.321584	0.985	288	tags=19%, list=6%, signal=20%
HALLMARK_ADIPOGENESIS	HALLMARK_ADIPOGENESIS	Details ...	64	0.32202	1.36524	0.105954	0.361875	0.994	1245	tags=38%, list=28%, signal=51%
HALLMARK_HEDGEHOG_SIGNALING	HALLMARK_HEDGEHOG_SIGNALING	Details ...	17	0.389128	1.28577	0.191562	0.509568	1	419	tags=24%, list=9%, signal=26%
HALLMARK_BILE_ACID_METABOLISM	HALLMARK_BILE_ACID_METABOLISM	Details ...	40	0.317589	1.26251	0.210309	0.533279	1	1248	tags=38%, list=28%, signal=52%
HALLMARK_COAGULATION	HALLMARK_COAGULATION	Details ...	35	0.326328	1.24838	0.215707	0.535336	1	330	tags=14%, list=7%, signal=15%
HALLMARK_MTORC1_SIGNALING	HALLMARK_MTORC1_SIGNALING		67	0.254336	1.07373	0.380424	0.678826	1	956	tags=27%, list=21%, signal=34%
HALLMARK_PI3K_AKT_MTOR_SIGNALING	HALLMARK_PI3K_AKT_MTOR_SIGNALING		43	0.25453	1.02032	0.465711	0.686148	1	1023	tags=26%, list=23%, signal=33%
HALLMARK_ALLOGRAFT_REJECTION	HALLMARK_ALLOGRAFT_REJECTION		48	0.25484	1.02797	0.473042	0.695228	1	1251	tags=31%, list=28%, signal=43%
HALLMARK_APOPTOSIS	HALLMARK_APOPTOSIS		41	0.262943	1.04001	0.440083	0.69757	1	694	tags=22%, list=16%, signal=26%
HALLMARK_FATTY_ACID_METABOLISM	HALLMARK_FATTY_ACID_METABOLISM		48	0.264241	1.0754	0.391658	0.702282	1	1238	tags=31%, list=28%, signal=43%
HALLMARK_TNFA_SIGNALING_VIA_NFKB	HALLMARK_TNFA_SIGNALING_VIA_NFKB		40	0.277166	1.0845	0.375	0.711267	1	916	tags=28%, list=21%, signal=34%
HALLMARK_KRAS_SIGNALING_DN	HALLMARK_KRAS_SIGNALING_DN		59	0.260071	1.09416	0.37105	0.719674	1	1246	tags=31%, list=28%, signal=42%
HALLMARK_CHOLESTEROL_HOMEOSTASIS	HALLMARK_CHOLESTEROL_HOMEOSTASIS		20	0.298198	1.04061	0.42671	0.722248	1	1198	tags=35%, list=27%, signal=48%
HALLMARK_UV_RESPONSE_UP	HALLMARK_UV_RESPONSE_UP		40	0.247269	0.974657	0.521516	0.723699	1	1208	tags=33%, list=27%, signal=44%
HALLMARK_GLYCOLYSIS	HALLMARK_GLYCOLYSIS		68	0.258982	1.10343	0.370594	0.729219	1	1214	tags=32%, list=27%, signal=44%
HALLMARK_HEME_METABOLISM	HALLMARK_HEME_METABOLISM		68	0.232282	0.977958	0.539619	0.74145	1	1148	tags=26%, list=26%, signal=35%
HALLMARK_MYC_TARGETS_V2	HALLMARK_MYC_TARGETS_V2		17	0.339871	1.11119	0.365385	0.743525	1	2746	tags=94%, list=62%, signal=244%
HALLMARK_IL2_STAT5_SIGNALING	HALLMARK_IL2_STAT5_SIGNALING	Details ...	59	0.2749	1.13935	0.328974	0.745971	1	927	tags=25%, list=21%, signal=32%
HALLMARK_PROTEIN_SECRETION	HALLMARK_PROTEIN_SECRETION	Details ...	37	0.289055	1.12253	0.346639	0.751553	1	1407	tags=43%, list=32%, signal=63%
HALLMARK_XENOBIOTIC_METABOLISM	HALLMARK_XENOBIOTIC_METABOLISM	Details ...	47	0.280914	1.14602	0.315574	0.76843	1	1234	tags=34%, list=28%, signal=47%
HALLMARK_ESTROGEN_RESPONSE_LATE	HALLMARK_ESTROGEN_RESPONSE_LATE		57	0.223251	0.931023	0.589069	0.776303	1	455	tags=14%, list=10%, signal=15%
HALLMARK_TGF_BETA_SIGNALING	HALLMARK_TGF_BETA_SIGNALING		22	0.261953	0.914014	0.582609	0.781059	1	1999	tags=59%, list=45%, signal=107%
HALLMARK_PEROXISOME	HALLMARK_PEROXISOME		40	0.221445	0.885714	0.62487	0.800171	1	367	tags=13%, list=8%, signal=13%
HALLMARK_UNFOLDED_PROTEIN_RESPONSE	HALLMARK_UNFOLDED_PROTEIN_RESPONSE		30	0.22504	0.851614	0.651014	0.82672	1	1063	tags=27%, list=24%, signal=35%
HALLMARK_COMPLEMENT	HALLMARK_COMPLEMENT		60	0.188877	0.784771	0.781377	0.89312	1	1148	tags=22%, list=26%, signal=29%
HALLMARK_SPERMATOGENESIS	HALLMARK_SPERMATOGENESIS		35	0.194953	0.753746	0.769792	0.903983	1	1113	tags=29%, list=25%, signal=38%
HALLMARK_INTERFERON_GAMMA_RESPONSE	HALLMARK_INTERFERON_GAMMA_RESPONSE		51	0.159985	0.654987	0.870276	0.930821	1	958	tags=22%, list=21%, signal=27%
HALLMARK_INFLAMMATORY_RESPONSE	HALLMARK_INFLAMMATORY_RESPONSE		46	0.169045	0.680577	0.840491	0.932191	1	3340	tags=89%, list=75%, signal=351%
HALLMARK_MYC_TARGETS_V1	HALLMARK_MYC_TARGETS_V1		58	0.148678	0.619616	0.906155	0.934956	1	3281	tags=84%, list=74%, signal=315%
HALLMARK_KRAS_SIGNALING_UP	HALLMARK_KRAS_SIGNALING_UP		49	0.168173	0.692115	0.829939	0.944587	1	1200	tags=27%, list=27%, signal=36%
HALLMARK_ANDROGEN_RESPONSE	HALLMARK_ANDROGEN_RESPONSE		31	0.121738	0.457482	0.968354	0.973009	1	3347	tags=84%, list=75%, signal=334%
HALLMARK_IL6_JAK_STAT3_SIGNALING	HALLMARK_IL6_JAK_STAT3_SIGNALING		21	0.140477	0.491069	0.963004	0.983574	1	916	tags=19%, list=21%, signal=24%

## Sheet: Recurrence_LOFMutations_GSEA
NAME	GS<br> follow link to MSigDB	GS DETAILS	SIZE	ES	NES	NOM p-val	FDR q-val	FWER p-val	RANK AT MAX	LEADING EDGE
HALLMARK_WNT_BETA_CATENIN_SIGNALING	HALLMARK_WNT_BETA_CATENIN_SIGNALING	Details ...	23	0.596678	2.02964	0.00108814	0.00723037	0.008	1332	tags=61%, list=26%, signal=82%
HALLMARK_UV_RESPONSE_DN	HALLMARK_UV_RESPONSE_DN	Details ...	60	0.509301	2.02701	0	0.00408109	0.009	1516	tags=60%, list=30%, signal=85%
HALLMARK_EPITHELIAL_MESENCHYMAL_TRANSITION	HALLMARK_EPITHELIAL_MESENCHYMAL_TRANSITION	Details ...	74	0.486737	1.97389	0	0.00393584	0.013	1380	tags=53%, list=27%, signal=71%
HALLMARK_MYOGENESIS	HALLMARK_MYOGENESIS	Details ...	85	0.467088	1.93105	0	0.00524588	0.023	1508	tags=51%, list=30%, signal=71%
HALLMARK_HEDGEHOG_SIGNALING	HALLMARK_HEDGEHOG_SIGNALING	Details ...	19	0.581571	1.90912	0	0.00548883	0.03	943	tags=53%, list=19%, signal=64%
HALLMARK_MTORC1_SIGNALING	HALLMARK_MTORC1_SIGNALING	Details ...	55	0.461579	1.82779	0.00101215	0.0146283	0.095	893	tags=40%, list=18%, signal=48%
HALLMARK_DNA_REPAIR	HALLMARK_DNA_REPAIR	Details ...	39	0.459228	1.72801	0.0103306	0.0326458	0.217	651	tags=26%, list=13%, signal=29%
HALLMARK_NOTCH_SIGNALING	HALLMARK_NOTCH_SIGNALING	Details ...	16	0.544232	1.71351	0.014756	0.0329054	0.243	1294	tags=56%, list=26%, signal=75%
HALLMARK_MITOTIC_SPINDLE	HALLMARK_MITOTIC_SPINDLE	Details ...	94	0.408147	1.68747	0	0.0385826	0.311	873	tags=32%, list=17%, signal=38%
HALLMARK_COAGULATION	HALLMARK_COAGULATION	Details ...	48	0.413855	1.61023	0.0122324	0.0707484	0.55	1403	tags=46%, list=28%, signal=63%
HALLMARK_COMPLEMENT	HALLMARK_COMPLEMENT	Details ...	71	0.382043	1.57413	0.00906344	0.0859392	0.65	1403	tags=41%, list=28%, signal=56%
HALLMARK_KRAS_SIGNALING_DN	HALLMARK_KRAS_SIGNALING_DN	Details ...	65	0.381194	1.51685	0.0281407	0.12238	0.804	1147	tags=35%, list=23%, signal=45%
HALLMARK_P53_PATHWAY	HALLMARK_P53_PATHWAY	Details ...	61	0.373301	1.48244	0.0380762	0.146586	0.872	1306	tags=33%, list=26%, signal=44%
HALLMARK_GLYCOLYSIS	HALLMARK_GLYCOLYSIS	Details ...	70	0.358763	1.45244	0.0290581	0.165285	0.926	1518	tags=43%, list=30%, signal=60%
HALLMARK_PROTEIN_SECRETION	HALLMARK_PROTEIN_SECRETION	Details ...	26	0.411475	1.45242	0.0912997	0.154266	0.926	1437	tags=46%, list=28%, signal=64%
HALLMARK_G2M_CHECKPOINT	HALLMARK_G2M_CHECKPOINT	Details ...	67	0.356495	1.45159	0.0381143	0.145195	0.926	1512	tags=42%, list=30%, signal=59%
HALLMARK_E2F_TARGETS	HALLMARK_E2F_TARGETS	Details ...	70	0.363225	1.44642	0.0351053	0.141489	0.931	1413	tags=37%, list=28%, signal=51%
HALLMARK_TGF_BETA_SIGNALING	HALLMARK_TGF_BETA_SIGNALING	Details ...	22	0.418202	1.41653	0.104526	0.164009	0.967	2277	tags=77%, list=45%, signal=140%
HALLMARK_OXIDATIVE_PHOSPHORYLATION	HALLMARK_OXIDATIVE_PHOSPHORYLATION	Details ...	57	0.356772	1.40135	0.0666667	0.17046	0.978	1021	tags=33%, list=20%, signal=41%
HALLMARK_PEROXISOME	HALLMARK_PEROXISOME	Details ...	39	0.366167	1.38442	0.105749	0.182035	0.989	1520	tags=44%, list=30%, signal=62%
HALLMARK_BILE_ACID_METABOLISM	HALLMARK_BILE_ACID_METABOLISM		37	0.364463	1.37829	0.101957	0.180187	0.99	1060	tags=35%, list=21%, signal=44%
HALLMARK_APOPTOSIS	HALLMARK_APOPTOSIS		41	0.355732	1.34087	0.12449	0.219288	0.997	1420	tags=41%, list=28%, signal=57%
HALLMARK_ADIPOGENESIS	HALLMARK_ADIPOGENESIS		69	0.334609	1.33986	0.0842528	0.211103	0.997	1483	tags=41%, list=29%, signal=57%
HALLMARK_IL2_STAT5_SIGNALING	HALLMARK_IL2_STAT5_SIGNALING		51	0.327099	1.27904	0.159184	0.284008	1	1149	tags=31%, list=23%, signal=40%
HALLMARK_HEME_METABOLISM	HALLMARK_HEME_METABOLISM		62	0.317366	1.2706	0.161972	0.286168	1	1518	tags=37%, list=30%, signal=52%
HALLMARK_HYPOXIA	HALLMARK_HYPOXIA		70	0.301605	1.22598	0.204614	0.342922	1	1463	tags=36%, list=29%, signal=50%
HALLMARK_ESTROGEN_RESPONSE_EARLY	HALLMARK_ESTROGEN_RESPONSE_EARLY		69	0.291192	1.16999	0.265531	0.424996	1	1034	tags=28%, list=20%, signal=34%
HALLMARK_APICAL_JUNCTION	HALLMARK_APICAL_JUNCTION		86	0.282778	1.16002	0.268537	0.427085	1	1506	tags=34%, list=30%, signal=47%
HALLMARK_UV_RESPONSE_UP	HALLMARK_UV_RESPONSE_UP		52	0.281931	1.09316	0.393145	0.529956	1	1480	tags=35%, list=29%, signal=48%
HALLMARK_ESTROGEN_RESPONSE_LATE	HALLMARK_ESTROGEN_RESPONSE_LATE		59	0.273824	1.07968	0.385238	0.536478	1	1391	tags=31%, list=28%, signal=42%
HALLMARK_ALLOGRAFT_REJECTION	HALLMARK_ALLOGRAFT_REJECTION		48	0.25297	0.976717	0.551863	0.701853	1	429	tags=13%, list=9%, signal=14%
HALLMARK_CHOLESTEROL_HOMEOSTASIS	HALLMARK_CHOLESTEROL_HOMEOSTASIS		26	0.275005	0.965588	0.513713	0.698477	1	1442	tags=31%, list=29%, signal=43%
HALLMARK_INFLAMMATORY_RESPONSE	HALLMARK_INFLAMMATORY_RESPONSE		45	0.246601	0.931856	0.5941	0.731653	1	1202	tags=27%, list=24%, signal=35%
HALLMARK_MYC_TARGETS_V2	HALLMARK_MYC_TARGETS_V2		21	0.272447	0.913556	0.596218	0.738424	1	1149	tags=33%, list=23%, signal=43%
HALLMARK_PI3K_AKT_MTOR_SIGNALING	HALLMARK_PI3K_AKT_MTOR_SIGNALING		42	0.234879	0.897872	0.629857	0.740551	1	2753	tags=69%, list=55%, signal=151%
HALLMARK_TNFA_SIGNALING_VIA_NFKB	HALLMARK_TNFA_SIGNALING_VIA_NFKB		49	0.229404	0.883527	0.64539	0.739446	1	1434	tags=29%, list=28%, signal=40%
HALLMARK_XENOBIOTIC_METABOLISM	HALLMARK_XENOBIOTIC_METABOLISM		65	0.215706	0.870983	0.692771	0.737621	1	853	tags=20%, list=17%, signal=24%
HALLMARK_MYC_TARGETS_V1	HALLMARK_MYC_TARGETS_V1		48	0.213747	0.821295	0.7294	0.782843	1	1029	tags=21%, list=20%, signal=26%
HALLMARK_SPERMATOGENESIS	HALLMARK_SPERMATOGENESIS		36	0.172506	0.637318	0.86189	0.938201	1	1035	tags=22%, list=21%, signal=28%
HALLMARK_UNFOLDED_PROTEIN_RESPONSE	HALLMARK_UNFOLDED_PROTEIN_RESPONSE		28	0.179226	0.632535	0.882229	0.917831	1	953	tags=18%, list=19%, signal=22%
HALLMARK_INTERFERON_GAMMA_RESPONSE	HALLMARK_INTERFERON_GAMMA_RESPONSE		51	0.120441	0.473115	0.965587	0.97164	1	3116	tags=69%, list=62%, signal=178%

## Sheet: PrimaryTumor_CNVGains_GSEA
NAME	GS<br> follow link to MSigDB	GS DETAILS	SIZE	ES	NES	NOM p-val	FDR q-val	FWER p-val	RANK AT MAX	LEADING EDGE
HALLMARK_INTERFERON_ALPHA_RESPONSE	HALLMARK_INTERFERON_ALPHA_RESPONSE	Details ...	97	0.288523	1.44428	0.019	0.136144	0.556	11995	tags=57%, list=43%, signal=99%
HALLMARK_INTERFERON_GAMMA_RESPONSE	HALLMARK_INTERFERON_GAMMA_RESPONSE	Details ...	200	0.284736	1.50892	0.001	0.13962	0.338	11722	tags=56%, list=42%, signal=95%
HALLMARK_TNFA_SIGNALING_VIA_NFKB	HALLMARK_TNFA_SIGNALING_VIA_NFKB	Details ...	200	0.276277	1.47824	0.001	0.142526	0.417	11802	tags=55%, list=42%, signal=94%
HALLMARK_PANCREAS_BETA_CELLS	HALLMARK_PANCREAS_BETA_CELLS	Details ...	40	0.330544	1.45015	0.048583	0.152757	0.532	6341	tags=40%, list=23%, signal=52%
HALLMARK_UV_RESPONSE_UP	HALLMARK_UV_RESPONSE_UP	Details ...	158	0.265771	1.38665	0.023	0.156038	0.76	8932	tags=42%, list=32%, signal=61%
HALLMARK_ANGIOGENESIS	HALLMARK_ANGIOGENESIS	Details ...	36	0.363031	1.53444	0.0295918	0.157378	0.267	9429	tags=53%, list=34%, signal=79%
HALLMARK_NOTCH_SIGNALING	HALLMARK_NOTCH_SIGNALING	Details ...	32	0.33664	1.387	0.0838446	0.174407	0.759	13242	tags=69%, list=47%, signal=130%
HALLMARK_UV_RESPONSE_DN	HALLMARK_UV_RESPONSE_DN	Details ...	144	0.270962	1.40009	0.017	0.175836	0.721	14004	tags=64%, list=50%, signal=127%
HALLMARK_PEROXISOME	HALLMARK_PEROXISOME	Details ...	104	0.267488	1.33492	0.0520521	0.228347	0.896	10888	tags=49%, list=39%, signal=80%
HALLMARK_IL2_STAT5_SIGNALING	HALLMARK_IL2_STAT5_SIGNALING	Details ...	199	0.289141	1.55564	0.001	0.254633	0.227	10657	tags=51%, list=38%, signal=81%
HALLMARK_BILE_ACID_METABOLISM	HALLMARK_BILE_ACID_METABOLISM	Details ...	112	0.259959	1.30821	0.062	0.265541	0.944	10889	tags=51%, list=39%, signal=83%
HALLMARK_MTORC1_SIGNALING	HALLMARK_MTORC1_SIGNALING	Details ...	200	0.237361	1.26046	0.06	0.370711	0.992	9440	tags=43%, list=34%, signal=64%
HALLMARK_TGF_BETA_SIGNALING	HALLMARK_TGF_BETA_SIGNALING	Details ...	54	0.266814	1.2314	0.170512	0.433558	0.998	14233	tags=65%, list=51%, signal=131%
HALLMARK_ESTROGEN_RESPONSE_EARLY	HALLMARK_ESTROGEN_RESPONSE_EARLY	Details ...	200	0.227307	1.2032	0.116	0.504832	0.999	15140	tags=62%, list=54%, signal=134%
HALLMARK_MYC_TARGETS_V1	HALLMARK_MYC_TARGETS_V1	Details ...	200	0.221438	1.18486	0.123	0.544243	1	15372	tags=63%, list=55%, signal=138%
HALLMARK_APOPTOSIS	HALLMARK_APOPTOSIS		161	0.213035	1.11773	0.251	0.546476	1	13641	tags=55%, list=49%, signal=106%
HALLMARK_EPITHELIAL_MESENCHYMAL_TRANSITION	HALLMARK_EPITHELIAL_MESENCHYMAL_TRANSITION		199	0.211841	1.13334	0.206	0.561904	1	13504	tags=55%, list=48%, signal=105%
HALLMARK_P53_PATHWAY	HALLMARK_P53_PATHWAY		200	0.208099	1.11789	0.236	0.569713	1	11836	tags=47%, list=42%, signal=80%
HALLMARK_ALLOGRAFT_REJECTION	HALLMARK_ALLOGRAFT_REJECTION		200	0.205973	1.10422	0.267	0.570856	1	10662	tags=42%, list=38%, signal=67%
HALLMARK_IL6_JAK_STAT3_SIGNALING	HALLMARK_IL6_JAK_STAT3_SIGNALING	Details ...	87	0.236844	1.16807	0.217217	0.576625	1	11353	tags=51%, list=40%, signal=85%
HALLMARK_KRAS_SIGNALING_UP	HALLMARK_KRAS_SIGNALING_UP	Details ...	200	0.212359	1.13562	0.19	0.58037	1	13264	tags=55%, list=47%, signal=103%
HALLMARK_UNFOLDED_PROTEIN_RESPONSE	HALLMARK_UNFOLDED_PROTEIN_RESPONSE		113	0.220292	1.11837	0.279	0.593967	1	13636	tags=55%, list=49%, signal=106%
HALLMARK_E2F_TARGETS	HALLMARK_E2F_TARGETS	Details ...	200	0.212516	1.13954	0.213	0.594608	1	9678	tags=40%, list=34%, signal=61%
HALLMARK_COMPLEMENT	HALLMARK_COMPLEMENT	Details ...	200	0.215929	1.14429	0.198	0.606419	1	11071	tags=45%, list=39%, signal=73%
HALLMARK_SPERMATOGENESIS	HALLMARK_SPERMATOGENESIS		135	0.20784	1.06697	0.35	0.611509	1	11232	tags=45%, list=40%, signal=75%
HALLMARK_CHOLESTEROL_HOMEOSTASIS	HALLMARK_CHOLESTEROL_HOMEOSTASIS	Details ...	74	0.241095	1.14935	0.25677	0.619792	1	11179	tags=46%, list=40%, signal=76%
HALLMARK_FATTY_ACID_METABOLISM	HALLMARK_FATTY_ACID_METABOLISM		158	0.205734	1.06784	0.348	0.629985	1	6808	tags=30%, list=24%, signal=39%
HALLMARK_APICAL_JUNCTION	HALLMARK_APICAL_JUNCTION		200	0.200778	1.07108	0.325	0.640729	1	12060	tags=46%, list=43%, signal=80%
HALLMARK_DNA_REPAIR	HALLMARK_DNA_REPAIR		150	0.206482	1.0753	0.342	0.649909	1	7547	tags=33%, list=27%, signal=44%
HALLMARK_PI3K_AKT_MTOR_SIGNALING	HALLMARK_PI3K_AKT_MTOR_SIGNALING		104	0.207294	1.0395	0.408	0.681515	1	8781	tags=37%, list=31%, signal=53%
HALLMARK_OXIDATIVE_PHOSPHORYLATION	HALLMARK_OXIDATIVE_PHOSPHORYLATION		200	0.193603	1.02556	0.427	0.706845	1	15429	tags=59%, list=55%, signal=130%
HALLMARK_WNT_BETA_CATENIN_SIGNALING	HALLMARK_WNT_BETA_CATENIN_SIGNALING		42	0.226366	0.985146	0.522312	0.771643	1	8839	tags=38%, list=31%, signal=56%
HALLMARK_KRAS_SIGNALING_DN	HALLMARK_KRAS_SIGNALING_DN		200	0.181225	0.967952	0.571	0.780391	1	7117	tags=29%, list=25%, signal=39%
HALLMARK_INFLAMMATORY_RESPONSE	HALLMARK_INFLAMMATORY_RESPONSE		200	0.187201	0.986885	0.546	0.789891	1	10873	tags=41%, list=39%, signal=66%
HALLMARK_ADIPOGENESIS	HALLMARK_ADIPOGENESIS		199	0.175983	0.940902	0.631	0.791022	1	8860	tags=35%, list=32%, signal=50%
HALLMARK_G2M_CHECKPOINT	HALLMARK_G2M_CHECKPOINT		200	0.175689	0.933169	0.649	0.791124	1	13535	tags=51%, list=48%, signal=97%
HALLMARK_GLYCOLYSIS	HALLMARK_GLYCOLYSIS		200	0.182426	0.969491	0.561	0.798049	1	17895	tags=70%, list=64%, signal=192%
HALLMARK_COAGULATION	HALLMARK_COAGULATION		138	0.183853	0.954065	0.6	0.798525	1	10895	tags=42%, list=39%, signal=68%
HALLMARK_ANDROGEN_RESPONSE	HALLMARK_ANDROGEN_RESPONSE		100	0.189533	0.942432	0.601602	0.807643	1	9269	tags=36%, list=33%, signal=54%
HALLMARK_APICAL_SURFACE	HALLMARK_APICAL_SURFACE		44	0.221033	0.987318	0.513105	0.812976	1	10763	tags=43%, list=38%, signal=70%
HALLMARK_PROTEIN_SECRETION	HALLMARK_PROTEIN_SECRETION		96	0.178848	0.885471	0.682	0.861973	1	4799	tags=22%, list=17%, signal=26%
HALLMARK_HEME_METABOLISM	HALLMARK_HEME_METABOLISM		200	0.167864	0.893054	0.743	0.865808	1	14922	tags=56%, list=53%, signal=118%
HALLMARK_MITOTIC_SPINDLE	HALLMARK_MITOTIC_SPINDLE		199	0.163866	0.873421	0.778	0.866569	1	13708	tags=50%, list=49%, signal=96%
HALLMARK_HYPOXIA	HALLMARK_HYPOXIA		200	0.162747	0.857074	0.808	0.87862	1	12025	tags=43%, list=43%, signal=75%
HALLMARK_MYC_TARGETS_V2	HALLMARK_MYC_TARGETS_V2		58	0.180526	0.830839	0.748491	0.882222	1	15425	tags=60%, list=55%, signal=134%
HALLMARK_MYOGENESIS	HALLMARK_MYOGENESIS		200	0.158567	0.840178	0.849	0.887435	1	13446	tags=47%, list=48%, signal=90%
HALLMARK_ESTROGEN_RESPONSE_LATE	HALLMARK_ESTROGEN_RESPONSE_LATE		200	0.14251	0.758361	0.933	0.954359	1	11173	tags=39%, list=40%, signal=64%
HALLMARK_REACTIVE_OXYGEN_SPECIES_PATHWAY	HALLMARK_REACTIVE_OXYGEN_SPECIES_PATHWAY		49	0.151621	0.682426	0.898785	0.970154	1	15102	tags=53%, list=54%, signal=115%
HALLMARK_XENOBIOTIC_METABOLISM	HALLMARK_XENOBIOTIC_METABOLISM		200	0.114982	0.614774	0.987	0.976812	1	17878	tags=62%, list=64%, signal=168%
HALLMARK_HEDGEHOG_SIGNALING	HALLMARK_HEDGEHOG_SIGNALING		36	0.161401	0.684763	0.861963	0.989344	1	22111	tags=86%, list=79%, signal=404%

## Sheet: Recurrence_CNVGains_GSEA
NAME	GS<br> follow link to MSigDB	GS DETAILS	SIZE	ES	NES	NOM p-val	FDR q-val	FWER p-val	RANK AT MAX	LEADING EDGE
HALLMARK_MTORC1_SIGNALING	HALLMARK_MTORC1_SIGNALING	Details ...	200	0.220156	1.5608	0.006	0.238317	0.523	11628	tags=52%, list=41%, signal=89%
HALLMARK_PANCREAS_BETA_CELLS	HALLMARK_PANCREAS_BETA_CELLS	Details ...	40	0.288225	1.5233	0.057754	0.246691	0.645	7907	tags=45%, list=28%, signal=63%
HALLMARK_NOTCH_SIGNALING	HALLMARK_NOTCH_SIGNALING	Details ...	32	0.32124	1.58394	0.038674	0.296116	0.46	8140	tags=50%, list=29%, signal=70%
HALLMARK_UV_RESPONSE_UP	HALLMARK_UV_RESPONSE_UP	Details ...	158	0.233716	1.62506	0.004	0.408053	0.339	10124	tags=47%, list=36%, signal=74%
HALLMARK_IL2_STAT5_SIGNALING	HALLMARK_IL2_STAT5_SIGNALING	Details ...	199	0.188057	1.32563	0.071	0.494339	0.991	10089	tags=44%, list=36%, signal=68%
HALLMARK_INTERFERON_GAMMA_RESPONSE	HALLMARK_INTERFERON_GAMMA_RESPONSE	Details ...	200	0.195772	1.3833	0.037	0.495834	0.953	6859	tags=34%, list=24%, signal=44%
HALLMARK_TNFA_SIGNALING_VIA_NFKB	HALLMARK_TNFA_SIGNALING_VIA_NFKB	Details ...	200	0.187826	1.33521	0.067	0.520238	0.988	13403	tags=56%, list=48%, signal=106%
HALLMARK_WNT_BETA_CATENIN_SIGNALING	HALLMARK_WNT_BETA_CATENIN_SIGNALING	Details ...	42	0.244254	1.29645	0.160883	0.540046	0.996	6657	tags=36%, list=24%, signal=47%
HALLMARK_INTERFERON_ALPHA_RESPONSE	HALLMARK_INTERFERON_ALPHA_RESPONSE	Details ...	97	0.216687	1.39443	0.0824121	0.54686	0.937	6235	tags=33%, list=22%, signal=42%
HALLMARK_PI3K_AKT_MTOR_SIGNALING	HALLMARK_PI3K_AKT_MTOR_SIGNALING	Details ...	104	0.205623	1.3409	0.105105	0.571483	0.985	12055	tags=52%, list=43%, signal=91%
HALLMARK_GLYCOLYSIS	HALLMARK_GLYCOLYSIS	Details ...	200	0.171085	1.2164	0.167	0.740712	0.999	17121	tags=70%, list=61%, signal=177%
HALLMARK_ALLOGRAFT_REJECTION	HALLMARK_ALLOGRAFT_REJECTION	Details ...	200	0.172885	1.22637	0.155	0.760821	0.999	10417	tags=43%, list=37%, signal=68%
HALLMARK_CHOLESTEROL_HOMEOSTASIS	HALLMARK_CHOLESTEROL_HOMEOSTASIS	Details ...	74	0.194645	1.19171	0.236069	0.784652	1	8371	tags=36%, list=30%, signal=52%
HALLMARK_OXIDATIVE_PHOSPHORYLATION	HALLMARK_OXIDATIVE_PHOSPHORYLATION	Details ...	200	0.162718	1.15073	0.244489	0.840933	1	11711	tags=47%, list=42%, signal=80%
HALLMARK_UV_RESPONSE_DN	HALLMARK_UV_RESPONSE_DN	Details ...	144	0.164343	1.11979	0.311311	0.866003	1	14196	tags=56%, list=51%, signal=113%
HALLMARK_ANGIOGENESIS	HALLMARK_ANGIOGENESIS	Details ...	36	0.223078	1.12899	0.314103	0.87894	1	11407	tags=50%, list=41%, signal=84%
HALLMARK_HEME_METABOLISM	HALLMARK_HEME_METABOLISM	Details ...	200	0.162313	1.15228	0.24	0.893018	1	9168	tags=38%, list=33%, signal=56%
HALLMARK_HYPOXIA	HALLMARK_HYPOXIA		200	0.113943	0.807837	0.825651	0.893634	1	4526	tags=19%, list=16%, signal=22%
HALLMARK_XENOBIOTIC_METABOLISM	HALLMARK_XENOBIOTIC_METABOLISM		200	0.107125	0.764725	0.861862	0.908368	1	20828	tags=77%, list=74%, signal=294%
HALLMARK_ESTROGEN_RESPONSE_EARLY	HALLMARK_ESTROGEN_RESPONSE_EARLY		200	0.125066	0.887241	0.685	0.912687	1	11547	tags=43%, list=41%, signal=72%
HALLMARK_APOPTOSIS	HALLMARK_APOPTOSIS		161	0.112473	0.777849	0.818819	0.913457	1	17015	tags=61%, list=61%, signal=154%
HALLMARK_MYC_TARGETS_V2	HALLMARK_MYC_TARGETS_V2		58	0.140126	0.808179	0.744376	0.914605	1	15081	tags=57%, list=54%, signal=123%
HALLMARK_TGF_BETA_SIGNALING	HALLMARK_TGF_BETA_SIGNALING		54	0.14588	0.834968	0.663571	0.916473	1	17690	tags=69%, list=63%, signal=185%
HALLMARK_ANDROGEN_RESPONSE	HALLMARK_ANDROGEN_RESPONSE		100	0.126791	0.816975	0.751509	0.922578	1	10588	tags=39%, list=38%, signal=62%
HALLMARK_MYC_TARGETS_V1	HALLMARK_MYC_TARGETS_V1		200	0.147187	1.05593	0.384	0.923028	1	15035	tags=58%, list=54%, signal=123%
HALLMARK_INFLAMMATORY_RESPONSE	HALLMARK_INFLAMMATORY_RESPONSE		200	0.124712	0.891921	0.707	0.928698	1	10417	tags=38%, list=37%, signal=60%
HALLMARK_KRAS_SIGNALING_UP	HALLMARK_KRAS_SIGNALING_UP		200	0.120959	0.865141	0.733	0.932089	1	7790	tags=30%, list=28%, signal=41%
HALLMARK_FATTY_ACID_METABOLISM	HALLMARK_FATTY_ACID_METABOLISM		158	0.119657	0.837717	0.742743	0.935267	1	13580	tags=47%, list=48%, signal=91%
HALLMARK_COMPLEMENT	HALLMARK_COMPLEMENT	Details ...	200	0.151642	1.07558	0.347	0.941322	1	8784	tags=35%, list=31%, signal=50%
HALLMARK_IL6_JAK_STAT3_SIGNALING	HALLMARK_IL6_JAK_STAT3_SIGNALING		87	0.145629	0.921398	0.598394	0.942885	1	8696	tags=36%, list=31%, signal=51%
HALLMARK_DNA_REPAIR	HALLMARK_DNA_REPAIR		150	0.123485	0.845516	0.737738	0.945495	1	14790	tags=55%, list=53%, signal=116%
HALLMARK_PROTEIN_SECRETION	HALLMARK_PROTEIN_SECRETION		96	0.140738	0.894611	0.646941	0.950448	1	10725	tags=41%, list=38%, signal=65%
HALLMARK_COAGULATION	HALLMARK_COAGULATION		138	0.152416	1.03486	0.442442	0.951228	1	13321	tags=51%, list=47%, signal=96%
HALLMARK_APICAL_JUNCTION	HALLMARK_APICAL_JUNCTION		200	0.126452	0.903297	0.658659	0.959275	1	15168	tags=56%, list=54%, signal=121%
HALLMARK_APICAL_SURFACE	HALLMARK_APICAL_SURFACE		44	0.11678	0.631088	0.896875	0.962423	1	11416	tags=41%, list=41%, signal=69%
HALLMARK_BILE_ACID_METABOLISM	HALLMARK_BILE_ACID_METABOLISM	Details ...	112	0.161793	1.05693	0.413065	0.965562	1	11102	tags=46%, list=40%, signal=75%
HALLMARK_EPITHELIAL_MESENCHYMAL_TRANSITION	HALLMARK_EPITHELIAL_MESENCHYMAL_TRANSITION		199	0.130086	0.923186	0.629	0.968417	1	19704	tags=75%, list=70%, signal=249%
HALLMARK_REACTIVE_OXYGEN_SPECIES_PATHWAY	HALLMARK_REACTIVE_OXYGEN_SPECIES_PATHWAY		49	0.101798	0.561726	0.932844	0.971797	1	20155	tags=73%, list=72%, signal=260%
HALLMARK_MITOTIC_SPINDLE	HALLMARK_MITOTIC_SPINDLE		199	0.132066	0.932976	0.626	0.973759	1	10417	tags=39%, list=37%, signal=62%
HALLMARK_ESTROGEN_RESPONSE_LATE	HALLMARK_ESTROGEN_RESPONSE_LATE		200	0.088278	0.635881	0.961	0.980094	1	14486	tags=50%, list=52%, signal=101%
HALLMARK_E2F_TARGETS	HALLMARK_E2F_TARGETS	Details ...	200	0.153269	1.07917	0.361	0.981134	1	11666	tags=46%, list=42%, signal=77%
HALLMARK_PEROXISOME	HALLMARK_PEROXISOME		104	0.144782	0.942431	0.573589	0.981479	1	13588	tags=52%, list=48%, signal=100%
HALLMARK_SPERMATOGENESIS	HALLMARK_SPERMATOGENESIS		135	0.14465	0.966501	0.549	0.981905	1	10974	tags=42%, list=39%, signal=69%
HALLMARK_G2M_CHECKPOINT	HALLMARK_G2M_CHECKPOINT		200	0.0935169	0.666316	0.946947	0.982016	1	17027	tags=60%, list=61%, signal=150%
HALLMARK_KRAS_SIGNALING_DN	HALLMARK_KRAS_SIGNALING_DN		200	0.137815	0.988028	0.519	1	1	11575	tags=45%, list=41%, signal=75%
HALLMARK_UNFOLDED_PROTEIN_RESPONSE	HALLMARK_UNFOLDED_PROTEIN_RESPONSE		113	0.14915	0.978691	0.511558	1	1	11625	tags=45%, list=41%, signal=77%
HALLMARK_MYOGENESIS	HALLMARK_MYOGENESIS		200	0.135179	0.97166	0.546	1	1	18276	tags=69%, list=65%, signal=195%
HALLMARK_ADIPOGENESIS	HALLMARK_ADIPOGENESIS		199	0.135768	0.968969	0.549	1	1	9117	tags=36%, list=32%, signal=52%
HALLMARK_P53_PATHWAY	HALLMARK_P53_PATHWAY		200	0.132487	0.946202	0.585	1	1	6863	tags=28%, list=24%, signal=36%

## Sheet: PrimaryTumor_CNVLosses_GSEA
NAME	GS<br> follow link to MSigDB	GS DETAILS	SIZE	ES	NES	NOM p-val	FDR q-val	FWER p-val	RANK AT MAX	LEADING EDGE
HALLMARK_HEDGEHOG_SIGNALING	HALLMARK_HEDGEHOG_SIGNALING	Details ...	32	0.440325	1.41353	0.0252016	0.450347	0.363	7888	tags=50%, list=36%, signal=78%
HALLMARK_ANGIOGENESIS	HALLMARK_ANGIOGENESIS	Details ...	26	0.440007	1.37098	0.0633299	0.366818	0.522	6163	tags=46%, list=28%, signal=64%
HALLMARK_REACTIVE_OXYGEN_SPECIES_PATHWAY	HALLMARK_REACTIVE_OXYGEN_SPECIES_PATHWAY	Details ...	37	0.403451	1.32871	0.0620621	0.390398	0.698	7919	tags=51%, list=36%, signal=80%
HALLMARK_CHOLESTEROL_HOMEOSTASIS	HALLMARK_CHOLESTEROL_HOMEOSTASIS	Details ...	52	0.37006	1.26238	0.088	0.634715	0.937	10544	tags=65%, list=48%, signal=126%
HALLMARK_APICAL_JUNCTION	HALLMARK_APICAL_JUNCTION	Details ...	150	0.32832	1.21716	0.052	0.82313	0.991	8732	tags=49%, list=40%, signal=81%
HALLMARK_HEME_METABOLISM	HALLMARK_HEME_METABOLISM	Details ...	156	0.315901	1.17622	0.091	1	0.999	8367	tags=44%, list=38%, signal=71%
HALLMARK_APICAL_SURFACE	HALLMARK_APICAL_SURFACE	Details ...	30	0.359864	1.16223	0.238191	1	1	7030	tags=47%, list=32%, signal=69%
HALLMARK_OXIDATIVE_PHOSPHORYLATION	HALLMARK_OXIDATIVE_PHOSPHORYLATION	Details ...	140	0.305887	1.12744	0.172	1	1	8317	tags=43%, list=38%, signal=69%
HALLMARK_COMPLEMENT	HALLMARK_COMPLEMENT	Details ...	142	0.301283	1.12013	0.186	1	1	8427	tags=43%, list=39%, signal=70%
HALLMARK_PEROXISOME	HALLMARK_PEROXISOME	Details ...	72	0.319538	1.11749	0.257	1	1	5637	tags=33%, list=26%, signal=45%
HALLMARK_ANDROGEN_RESPONSE	HALLMARK_ANDROGEN_RESPONSE	Details ...	72	0.304771	1.0692	0.336	1	1	7596	tags=42%, list=35%, signal=64%
HALLMARK_ESTROGEN_RESPONSE_LATE	HALLMARK_ESTROGEN_RESPONSE_LATE	Details ...	153	0.286808	1.06787	0.321	1	1	11463	tags=61%, list=53%, signal=128%
HALLMARK_PROTEIN_SECRETION	HALLMARK_PROTEIN_SECRETION	Details ...	76	0.299178	1.05801	0.354	1	1	11125	tags=62%, list=51%, signal=126%
HALLMARK_HYPOXIA	HALLMARK_HYPOXIA	Details ...	154	0.283502	1.05584	0.329	1	1	8741	tags=44%, list=40%, signal=73%
HALLMARK_P53_PATHWAY	HALLMARK_P53_PATHWAY	Details ...	152	0.28482	1.04994	0.334	1	1	8723	tags=45%, list=40%, signal=74%
HALLMARK_APOPTOSIS	HALLMARK_APOPTOSIS	Details ...	119	0.276981	1.00799	0.473	1	1	10531	tags=51%, list=48%, signal=99%
HALLMARK_MYC_TARGETS_V1	HALLMARK_MYC_TARGETS_V1	Details ...	161	0.268242	1.00796	0.491	1	1	12127	tags=60%, list=56%, signal=133%
HALLMARK_SPERMATOGENESIS	HALLMARK_SPERMATOGENESIS	Details ...	110	0.279142	1.00608	0.493	1	1	8775	tags=43%, list=40%, signal=71%
HALLMARK_FATTY_ACID_METABOLISM	HALLMARK_FATTY_ACID_METABOLISM	Details ...	119	0.274237	0.98975	0.54	1	1	10570	tags=52%, list=48%, signal=100%
HALLMARK_COAGULATION	HALLMARK_COAGULATION	Details ...	98	0.268932	0.97733	0.55	1	1	7559	tags=38%, list=35%, signal=58%
HALLMARK_MYOGENESIS	HALLMARK_MYOGENESIS		159	0.260297	0.95904	0.629	1	1	7622	tags=35%, list=35%, signal=53%
HALLMARK_DNA_REPAIR	HALLMARK_DNA_REPAIR		117	0.263118	0.958209	0.621	1	1	12106	tags=61%, list=55%, signal=136%
HALLMARK_ESTROGEN_RESPONSE_EARLY	HALLMARK_ESTROGEN_RESPONSE_EARLY		144	0.260104	0.955546	0.632	1	1	11463	tags=57%, list=53%, signal=119%
HALLMARK_XENOBIOTIC_METABOLISM	HALLMARK_XENOBIOTIC_METABOLISM		158	0.255834	0.953768	0.634	1	1	10566	tags=51%, list=48%, signal=99%
HALLMARK_INFLAMMATORY_RESPONSE	HALLMARK_INFLAMMATORY_RESPONSE		151	0.252587	0.937288	0.686	1	1	10297	tags=50%, list=47%, signal=93%
HALLMARK_ALLOGRAFT_REJECTION	HALLMARK_ALLOGRAFT_REJECTION		151	0.246223	0.913027	0.727	1	1	10528	tags=46%, list=48%, signal=89%
HALLMARK_IL2_STAT5_SIGNALING	HALLMARK_IL2_STAT5_SIGNALING		137	0.249773	0.912625	0.744	1	1	10415	tags=47%, list=48%, signal=89%
HALLMARK_GLYCOLYSIS	HALLMARK_GLYCOLYSIS		154	0.241296	0.898323	0.79	1	1	7592	tags=33%, list=35%, signal=50%
HALLMARK_ADIPOGENESIS	HALLMARK_ADIPOGENESIS		143	0.239799	0.879626	0.823	1	1	10575	tags=48%, list=48%, signal=93%
HALLMARK_IL6_JAK_STAT3_SIGNALING	HALLMARK_IL6_JAK_STAT3_SIGNALING		66	0.254496	0.876122	0.751	1	1	10303	tags=50%, list=47%, signal=94%
HALLMARK_MTORC1_SIGNALING	HALLMARK_MTORC1_SIGNALING		143	0.233559	0.858878	0.859	1	1	10857	tags=48%, list=50%, signal=95%
HALLMARK_PANCREAS_BETA_CELLS	HALLMARK_PANCREAS_BETA_CELLS		27	0.275157	0.856263	0.718	1	1	8089	tags=37%, list=37%, signal=59%
HALLMARK_UNFOLDED_PROTEIN_RESPONSE	HALLMARK_UNFOLDED_PROTEIN_RESPONSE		87	0.241209	0.855466	0.815	1	1	10054	tags=46%, list=46%, signal=85%
HALLMARK_KRAS_SIGNALING_DN	HALLMARK_KRAS_SIGNALING_DN		148	0.233293	0.855447	0.875	1	1	11096	tags=51%, list=51%, signal=102%
HALLMARK_EPITHELIAL_MESENCHYMAL_TRANSITION	HALLMARK_EPITHELIAL_MESENCHYMAL_TRANSITION		148	0.229801	0.845645	0.876	1	1	10489	tags=45%, list=48%, signal=85%
HALLMARK_KRAS_SIGNALING_UP	HALLMARK_KRAS_SIGNALING_UP		161	0.226488	0.837174	0.913	1	1	10556	tags=47%, list=48%, signal=90%
HALLMARK_MITOTIC_SPINDLE	HALLMARK_MITOTIC_SPINDLE		158	0.22383	0.825747	0.918	1	1	8595	tags=39%, list=39%, signal=63%
HALLMARK_TGF_BETA_SIGNALING	HALLMARK_TGF_BETA_SIGNALING		40	0.238905	0.788198	0.83651	1	1	6477	tags=30%, list=30%, signal=43%
HALLMARK_NOTCH_SIGNALING	HALLMARK_NOTCH_SIGNALING		22	0.25589	0.784818	0.803046	1	1	5678	tags=23%, list=26%, signal=31%
HALLMARK_UV_RESPONSE_UP	HALLMARK_UV_RESPONSE_UP		116	0.212887	0.775278	0.946	1	1	7562	tags=29%, list=35%, signal=45%
HALLMARK_TNFA_SIGNALING_VIA_NFKB	HALLMARK_TNFA_SIGNALING_VIA_NFKB		142	0.205955	0.759288	0.97	1	1	11424	tags=48%, list=52%, signal=100%
HALLMARK_BILE_ACID_METABOLISM	HALLMARK_BILE_ACID_METABOLISM		79	0.211137	0.746359	0.938	1	1	8615	tags=35%, list=39%, signal=58%
HALLMARK_G2M_CHECKPOINT	HALLMARK_G2M_CHECKPOINT		168	0.195314	0.726943	0.978	1	1	11131	tags=47%, list=51%, signal=95%
HALLMARK_WNT_BETA_CATENIN_SIGNALING	HALLMARK_WNT_BETA_CATENIN_SIGNALING		34	0.224515	0.722021	0.886887	1	1	10064	tags=44%, list=46%, signal=82%
HALLMARK_PI3K_AKT_MTOR_SIGNALING	HALLMARK_PI3K_AKT_MTOR_SIGNALING		81	0.202544	0.714849	0.96	1	1	12098	tags=52%, list=55%, signal=116%
HALLMARK_MYC_TARGETS_V2	HALLMARK_MYC_TARGETS_V2		49	0.207399	0.702035	0.938939	1	1	12510	tags=57%, list=57%, signal=134%
HALLMARK_E2F_TARGETS	HALLMARK_E2F_TARGETS		160	0.179474	0.66356	0.997	1	1	12164	tags=51%, list=56%, signal=114%
HALLMARK_INTERFERON_GAMMA_RESPONSE	HALLMARK_INTERFERON_GAMMA_RESPONSE		149	0.172535	0.633803	0.998	1	1	10291	tags=40%, list=47%, signal=76%
HALLMARK_UV_RESPONSE_DN	HALLMARK_UV_RESPONSE_DN		108	0.162723	0.587003	0.998	1	1	12196	tags=46%, list=56%, signal=104%
HALLMARK_INTERFERON_ALPHA_RESPONSE	HALLMARK_INTERFERON_ALPHA_RESPONSE		73	0.151408	0.536942	0.997	0.996256	1	13694	tags=55%, list=63%, signal=147%

## Sheet: Recurrence_CNVLosses_GSEA
NAME	GS<br> follow link to MSigDB	GS DETAILS	SIZE	ES	NES	NOM p-val	FDR q-val	FWER p-val	RANK AT MAX	LEADING EDGE
HALLMARK_HEDGEHOG_SIGNALING	HALLMARK_HEDGEHOG_SIGNALING	Details ...	33	0.453226	1.5019	0.0170683	0.135163	0.125	7394	tags=55%, list=28%, signal=76%
HALLMARK_ANDROGEN_RESPONSE	HALLMARK_ANDROGEN_RESPONSE	Details ...	92	0.360765	1.32081	0.022	0.572953	0.698	7355	tags=40%, list=28%, signal=56%
HALLMARK_PROTEIN_SECRETION	HALLMARK_PROTEIN_SECRETION	Details ...	90	0.353955	1.30573	0.036	0.463398	0.772	6664	tags=37%, list=26%, signal=49%
HALLMARK_APICAL_SURFACE	HALLMARK_APICAL_SURFACE	Details ...	38	0.361156	1.2202	0.172518	0.934217	0.98	14450	tags=79%, list=55%, signal=177%
HALLMARK_HEME_METABOLISM	HALLMARK_HEME_METABOLISM	Details ...	185	0.31461	1.2162	0.043	0.779402	0.984	9492	tags=42%, list=36%, signal=65%
HALLMARK_CHOLESTEROL_HOMEOSTASIS	HALLMARK_CHOLESTEROL_HOMEOSTASIS	Details ...	72	0.331083	1.19034	0.148	0.863685	0.996	9400	tags=44%, list=36%, signal=69%
HALLMARK_ANGIOGENESIS	HALLMARK_ANGIOGENESIS	Details ...	30	0.342424	1.12578	0.290616	1	1	4112	tags=27%, list=16%, signal=32%
HALLMARK_APICAL_JUNCTION	HALLMARK_APICAL_JUNCTION	Details ...	185	0.287474	1.11496	0.18	1	1	11630	tags=49%, list=45%, signal=88%
HALLMARK_FATTY_ACID_METABOLISM	HALLMARK_FATTY_ACID_METABOLISM	Details ...	147	0.288442	1.10312	0.229	1	1	6396	tags=31%, list=25%, signal=41%
HALLMARK_HYPOXIA	HALLMARK_HYPOXIA	Details ...	190	0.281635	1.09403	0.218	1	1	9294	tags=40%, list=36%, signal=62%
HALLMARK_ESTROGEN_RESPONSE_EARLY	HALLMARK_ESTROGEN_RESPONSE_EARLY	Details ...	182	0.280366	1.0807	0.265	1	1	7379	tags=34%, list=28%, signal=47%
HALLMARK_COMPLEMENT	HALLMARK_COMPLEMENT	Details ...	181	0.278466	1.07345	0.307	1	1	9234	tags=39%, list=35%, signal=59%
HALLMARK_SPERMATOGENESIS	HALLMARK_SPERMATOGENESIS	Details ...	123	0.282125	1.07266	0.299	1	1	7408	tags=35%, list=28%, signal=49%
HALLMARK_MYOGENESIS	HALLMARK_MYOGENESIS	Details ...	183	0.276973	1.07218	0.262	1	1	10686	tags=44%, list=41%, signal=74%
HALLMARK_GLYCOLYSIS	HALLMARK_GLYCOLYSIS	Details ...	187	0.27093	1.05148	0.341	1	1	9461	tags=40%, list=36%, signal=62%
HALLMARK_ALLOGRAFT_REJECTION	HALLMARK_ALLOGRAFT_REJECTION	Details ...	184	0.26406	1.01846	0.441	1	1	10268	tags=41%, list=39%, signal=68%
HALLMARK_MITOTIC_SPINDLE	HALLMARK_MITOTIC_SPINDLE	Details ...	181	0.26022	1.01032	0.458	1	1	9509	tags=38%, list=36%, signal=59%
HALLMARK_REACTIVE_OXYGEN_SPECIES_PATHWAY	HALLMARK_REACTIVE_OXYGEN_SPECIES_PATHWAY	Details ...	47	0.288985	1.00357	0.499499	1	1	5331	tags=26%, list=20%, signal=32%
HALLMARK_COAGULATION	HALLMARK_COAGULATION	Details ...	129	0.264052	0.998982	0.503	1	1	10121	tags=43%, list=39%, signal=69%
HALLMARK_MYC_TARGETS_V1	HALLMARK_MYC_TARGETS_V1	Details ...	182	0.254456	0.983047	0.551	1	1	11450	tags=45%, list=44%, signal=80%
HALLMARK_XENOBIOTIC_METABOLISM	HALLMARK_XENOBIOTIC_METABOLISM		185	0.248324	0.961728	0.611	1	1	14412	tags=59%, list=55%, signal=131%
HALLMARK_PEROXISOME	HALLMARK_PEROXISOME		95	0.259722	0.958575	0.595	1	1	10734	tags=41%, list=41%, signal=70%
HALLMARK_IL2_STAT5_SIGNALING	HALLMARK_IL2_STAT5_SIGNALING		176	0.23693	0.913711	0.754	1	1	11065	tags=43%, list=42%, signal=74%
HALLMARK_KRAS_SIGNALING_UP	HALLMARK_KRAS_SIGNALING_UP		185	0.236773	0.913172	0.756	1	1	14990	tags=62%, list=57%, signal=145%
HALLMARK_PANCREAS_BETA_CELLS	HALLMARK_PANCREAS_BETA_CELLS		34	0.276394	0.912711	0.643574	1	1	4255	tags=18%, list=16%, signal=21%
HALLMARK_EPITHELIAL_MESENCHYMAL_TRANSITION	HALLMARK_EPITHELIAL_MESENCHYMAL_TRANSITION		182	0.236925	0.907201	0.759	1	1	11645	tags=47%, list=45%, signal=85%
HALLMARK_P53_PATHWAY	HALLMARK_P53_PATHWAY		189	0.233942	0.906115	0.766	1	1	6508	tags=25%, list=25%, signal=34%
HALLMARK_ESTROGEN_RESPONSE_LATE	HALLMARK_ESTROGEN_RESPONSE_LATE		189	0.233373	0.906015	0.78	1	1	14274	tags=57%, list=55%, signal=124%
HALLMARK_APOPTOSIS	HALLMARK_APOPTOSIS		154	0.230973	0.881557	0.809	1	1	14220	tags=56%, list=55%, signal=123%
HALLMARK_WNT_BETA_CATENIN_SIGNALING	HALLMARK_WNT_BETA_CATENIN_SIGNALING		40	0.25763	0.876716	0.717588	1	1	13298	tags=58%, list=51%, signal=117%
HALLMARK_MYC_TARGETS_V2	HALLMARK_MYC_TARGETS_V2		54	0.250569	0.870066	0.753	1	1	16892	tags=74%, list=65%, signal=210%
HALLMARK_DNA_REPAIR	HALLMARK_DNA_REPAIR		140	0.228158	0.865816	0.837	1	1	11498	tags=44%, list=44%, signal=78%
HALLMARK_PI3K_AKT_MTOR_SIGNALING	HALLMARK_PI3K_AKT_MTOR_SIGNALING		97	0.230952	0.854514	0.827	1	1	6516	tags=25%, list=25%, signal=33%
HALLMARK_INFLAMMATORY_RESPONSE	HALLMARK_INFLAMMATORY_RESPONSE		183	0.217661	0.841248	0.885	1	1	14433	tags=54%, list=55%, signal=119%
HALLMARK_G2M_CHECKPOINT	HALLMARK_G2M_CHECKPOINT		187	0.216117	0.830742	0.932	1	1	11538	tags=44%, list=44%, signal=79%
HALLMARK_OXIDATIVE_PHOSPHORYLATION	HALLMARK_OXIDATIVE_PHOSPHORYLATION		181	0.213081	0.818756	0.932	1	1	14821	tags=56%, list=57%, signal=130%
HALLMARK_ADIPOGENESIS	HALLMARK_ADIPOGENESIS		179	0.206275	0.789271	0.958	1	1	11257	tags=41%, list=43%, signal=71%
HALLMARK_TGF_BETA_SIGNALING	HALLMARK_TGF_BETA_SIGNALING		49	0.224431	0.779424	0.83984	1	1	15604	tags=63%, list=60%, signal=157%
HALLMARK_KRAS_SIGNALING_DN	HALLMARK_KRAS_SIGNALING_DN		182	0.197424	0.7603	0.98	1	1	15861	tags=62%, list=61%, signal=156%
HALLMARK_UV_RESPONSE_DN	HALLMARK_UV_RESPONSE_DN		134	0.200567	0.758041	0.945	1	1	11181	tags=40%, list=43%, signal=70%
HALLMARK_BILE_ACID_METABOLISM	HALLMARK_BILE_ACID_METABOLISM		101	0.20498	0.753888	0.941	1	1	11239	tags=41%, list=43%, signal=71%
HALLMARK_UNFOLDED_PROTEIN_RESPONSE	HALLMARK_UNFOLDED_PROTEIN_RESPONSE		105	0.200495	0.743501	0.941	1	1	15349	tags=57%, list=59%, signal=138%
HALLMARK_INTERFERON_ALPHA_RESPONSE	HALLMARK_INTERFERON_ALPHA_RESPONSE		90	0.197159	0.725883	0.95	1	1	14111	tags=48%, list=54%, signal=104%
HALLMARK_IL6_JAK_STAT3_SIGNALING	HALLMARK_IL6_JAK_STAT3_SIGNALING		79	0.199687	0.720327	0.946	1	1	14037	tags=52%, list=54%, signal=112%
HALLMARK_E2F_TARGETS	HALLMARK_E2F_TARGETS		190	0.18099	0.701578	0.991	1	1	14182	tags=48%, list=54%, signal=105%
HALLMARK_INTERFERON_GAMMA_RESPONSE	HALLMARK_INTERFERON_GAMMA_RESPONSE		181	0.178434	0.691257	0.997	1	1	16464	tags=61%, list=63%, signal=164%
HALLMARK_MTORC1_SIGNALING	HALLMARK_MTORC1_SIGNALING		180	0.177959	0.686412	0.993	1	1	11101	tags=36%, list=43%, signal=62%
HALLMARK_TNFA_SIGNALING_VIA_NFKB	HALLMARK_TNFA_SIGNALING_VIA_NFKB		185	0.170031	0.656423	0.995	1	1	15153	tags=53%, list=58%, signal=126%
HALLMARK_NOTCH_SIGNALING	HALLMARK_NOTCH_SIGNALING		26	0.205	0.655037	0.905775	1	1	6877	tags=23%, list=26%, signal=31%
HALLMARK_UV_RESPONSE_UP	HALLMARK_UV_RESPONSE_UP		141	0.150606	0.56839	0.998	0.994634	1	14814	tags=49%, list=57%, signal=113%
