# Supplementary material for: Analysis of matched primary and recurrent BRCA1/2 mutation-associated tumors identifies recurrence-specific drivers
Source: Research Square preprint supplement (doi:10.21203/rs.3.rs-745248/v1), 2021-08-30
Supplement: Supplementary file 13 [file 7cac9c2d09c3477dd8a332fa.xlsx]

## Sheet: Primaries_amp_genes.conf_90
cytoband	10q11.21	20q11.21	8q24.21	15q26.1	6p22.2	4p11	1q21.1	7q34	1p36.13	9q13	3q29	17q11.2	6p21.32	12q12	22q11.21	9p13.2	3q26.2	1q21.2	1q21.3	15q26.3	1q42.3	7q21.2	8p23.1	19q12	20p11.1	8q23.1	16p11.2	5p13.2	22q11.1	6p22.1	2p11.1	3p26.1	18p11.21	10q23.31	14q11.2	6q23.2
q value	1.4374e-07	1.4374e-07	1.4374e-07	2.3238e-06	1.0883e-05	1.6507e-05	2.404e-07	0.00010372	0.00019143	0.00027855	0.00049504	0.0034967	0.0044628	0.0092806	0.0081656	0.0077812	0.012244	1.1895e-05	8.5164e-05	0.007305	0.0357	0.040843	0.040843	0.049794	0.031626	0.00010372	0.065376	0.067495	0.057115	0.021497	0.092348	0.10174	0.11678	0.12186	0.16008	0.23136
residual q value	1.4374e-07	1.4374e-07	2.7959e-06	6.2303e-06	1.5473e-05	1.6507e-05	2.2639e-05	0.00010372	0.00019143	0.00041117	0.00061069	0.0034967	0.0080266	0.0092806	0.010296	0.012602	0.015507	0.016314	0.025748	0.028605	0.0357	0.040843	0.040843	0.049794	0.057047	0.063058	0.065376	0.067495	0.075653	0.083036	0.092348	0.10174	0.11678	0.12186	0.16008	0.23136
wide peak boundaries	chr10:38969196-42690684	chr20:26211188-29595819	chr8:124438016-131137178	chr15:93421245-93494449	chr6:26631772-27162991	chr4:49147554-49175480	chr1:143273750-144854179	chr7:142458698-142498707	chr1:16862462-16937657	chr9:67321253-68403260	chr3:195507108-195518329	chr17:29367729-29681310	chr6:32557302-32605256	chr12:40904613-40930138	chr22:20098296-20724111	chr9:36620418-37315460	chr3:167735977-169417458	chr1:147371467-149235965	chr1:151793874-152084404	chr15:102293142-102531392	chr1:230443080-236655436	chr7:91499595-92696755	chr8:12287958-12406713	chr19:27733082-37223818	chr20:25829320-25838175	chr8:95894608-124456639	chr16:31624303-32842696	chr5:33627643-34818426	chr22:1-16913373	chr6:29633117-29911443	chr2:92030152-92031316	chr3:1-10227087	chr18:14167280-14552776	chr10:89543926-90435276	chr14:1-20147317	chr6:133840009-136591190
genes in wide peak	ACTR3BP5	[FRG1B]	hsa-mir-1208	hsa-mir-3175	hsa-mir-3143	[CWH43]	hsa-mir-3118-3	PRSS1	NBPF1	ANKRD20A1	MUC4	EVI2A	HLA-DQA1	[LRRK2]	hsa-mir-1286	PAX5	hsa-mir-551b	GJA8	RORC	hsa-mir-1302-10	hsa-mir-1537	hsa-mir-1285-1	FAM86B2	APLP1	[FAM182B]	hsa-mir-548d-1	ZNF267	AMACR	POTEH	HLA-A	[GGT8P]	CAV3	CYP4F35P	PTEN	POTEG	hsa-mir-548a-2
			hsa-mir-1207	CHD2	HIST1H4I		PDE4DIP	PRSS2	MIR3675	ANKRD20A3		EVI2B	HLA-DRB1		RANBP1	MELK	MECOM	NBPF14	S100A10	OR4F4	hsa-mir-1182	KRIT1	LOC100506990	ATP4A		hsa-mir-2053	TP53TG3	RAI14	OR11H1	HLA-F		FANCD2	POTEC	LIPF	OR11H12	EYA4
			hsa-mir-1205	MIR3175	HIST1H2AG		PPIAL4A	TRY6		FAM27B		NF1			TRMT2A	ZCCHC7	GOLIM4	GPR89B	S100A11	WASH3P	AGT	CDK6		CAPNS1		hsa-mir-548a-3	ZNF720	SLC45A2		HLA-G		GRM7	CXADRP3	RNLS	POTEM	MYB
			hsa-mir-1204	LOC100507217	HIST1H2BJ		FLJ39739					OMG			ZDHHC8	LOC100506710	EGFEM1P	PPIAL4A	TCHH	OR4F6	LYST	CYP51A1		CCNE1		hsa-mir-3151	LOC390705	RXFP3		HLA-H		IL5RA	ANKRD20A5P	ATAD1	LOC642426	SGK1
			ANXA13		ZNF322		NBPF9					MIR4733			DGCR8	MIR4540	MIR551B	NBPF11	THEM4	OR4F15	GNG4	PEX1		CD22		hsa-mir-1273	HERC2P4	ADAMTS12		MOG		IRAK2		LIPJ		TCF21
			MYC		HIST1H2AH		PPIAL4G								RTN4R	MIR4475		NBPF15	TCHHL1	FAM138E	KCNK1	MTERF		CEBPA		hsa-mir-875	TP53TG3C	C1QTNF3		HCG4		ITPR1		CFL1P1		TBPL1
			NDUFB9		HIST1H2BK		SRGAP2P2								DGCR6L	MIR4476		FLJ39739	THEM5	GPCRLTM7	NID1	AKAP9		CEBPG		hsa-mir-3150	LOC729264	C1QTNF3-AMACR		HCG4B		OGG1		KLLN		BCLAF1
			POU5F1B		GUSBP2		PPIAL4B								RIMBP3			PPIAL4D	LOC100132111	DDX11L1	TARBP1	ANKIB1		TBCB		ANGPT1	TP53TG3B			HLA-F-AS1		OXTR				HBS1L
			PVT1		LINC00240		LOC653513								LOC150197			LOC645166	C2CD4D	DDX11L9	TBCE	GATAD1		COX6B1		ATP6V1C1	KIAA0664L3			IFITM4P		SETMAR				PDE7B
			SQLE		LOC100270746		PPIAL4C								LOC284865			PPIAL4B			GPR137B	RBM48		COX7A1		COX6C				ZFP57		VHL				AHI1
			MTSS1		MIR3143		FAM72D								LOC388849			NBPF24			TSNAX	MGC16142		ETV2		DPYS				LOC554223		BRPF1				ALDH8A1
			KIAA0196				LOC728855								TMEM191B			GPR89C			GNPAT	FAM133B		GPI		EXT1						CAMK1				FAM54A
			TRIB1				LOC728875								PI4KAP1			NBPF16			GGPS1	LRRD1		FFAR1		HAS2						BHLHE40				MGC34034
			RNF139				PFN1P2								LOC729444			PDZK1P1			TOMM20	LOC728066		FFAR3		EIF3E						EDEM1				SLC2A12
			ASAP1				LOC100130000								MIR1286			PPIAL4F			CAPN9			FFAR2		KCNS2						SRGAP3				LOC154092
			FAM49B				LOC100286793											PPIAL4E			COG2			HPN		MATN2						ARPC4				HMGA1P7
			TRMT12																		RBM34			LRP3		NOV						TADA3				LINC00271
			WDYHV1																		DISC2			MAG		ODF1						CHL1				MIR3662
			GSDMC																		DISC1			NPHS1		TNFRSF11B						THUMPD3
			TATDN1																		ARID4B			PEPD		ENPP2						TTLL3
			FBXO32																		EGLN1			FXYD1		POLR2K						CNTN6
			ZNF572																		KIAA1383			FXYD3		RAD21						LINC00312
			TMEM65																		ERO1LB			POLR2I		RPL30						LMCD1
			LOC157381																		SIPA1L2			SCN1B		SDC2						C3orf32
			FAM84B																		ARV1			TYROBP		SNTB1						TRNT1
			FAM91A1																		TTC13			UQCRFS1		SPAG1						CRBN
			NSMCE2																		PGBD5			USF2		STK3						ARL8B
			KLHL38																		PCNXL2			ZNF146		TAF2						SETD5
			FER1L6-AS1																		C1orf124			URI1		KLF10						TMEM111
			FER1L6																		NTPCR			PDCD5		TRHR						BRK1
			LOC727677																		KIAA1804			KIAA0355		TRPS1						RAD18
			LOC728724																		C1orf198			ZNF536		COL14A1						LRRN1
			LOC100130231																		C1orf131			MLL4		UQCRB						CIDEC
			MIR1205																		EDARADD			UBA2		YWHAZ						MTMR14
			MIR1206																		SLC35F3			TMEM147		FZD6						CRELD1
			MIR1207																		B3GALNT2			POP4		EIF3H						JAGN1
			MIR1204																		EXOC8			HCST		CCNE2						IL17RC
			MIR1208																		IRF2BP2			UPK1A		EBAG9						C3orf24
			LOC100507117																		FAM89A			SLC7A9		TTC35						IL17RE
			PCAT1																		C1orf31			ZNF507		RIMS2						CPNE9
																					TRIM67			HAUS5		PTDSS1						CIDECP
																					SNRPD2P2			CLIP3		HRSP12						CNTN4
																					SNORA14B			LSM14A		PGCP						SUMF1
																					LOC100287814			GAPDHS		COLEC10						RPUSD3
																					MIR1182			ZBTB32		POP1						PRRT3
																					MIR1537			LSR		ZHX1						LHFPL4
																					LINC00184			FXYD7		ZHX2						LOC401052
																					TSNAX-DISC1			FXYD5		ZFPM2						LOC440944
																					LOC100506795			GPATCH1		DCAF13						EGOT
																					LOC100506810			PSENEN		RNF19A						LOC100288428
																					MIR4753			ZNF302		RGS22						LOC100507582
																					MIR4671			LIN37		SNORA72						ARPC4-TTLL3
																					MIR4427			SLC7A10		PABPC1						MIR4790
																								TSHZ3		KCNV1
																								GRAMD1A		MTBP
																								ZFP14		MRPL13
																								ZNF529		ATAD2
																								HAMP		LRP12
																								PRODH2		RRM2B
																								CHST8		MTERFD1
																								KCTD15		ZNF706
																								PLEKHF1		UBR5
																								RBM42		AZIN1
																								LRFN3		OXR1
																								IGFLR1		WDYHV1
																								LOC80054		LAPTM4B
																								C19orf12		SYBU
																								KIRREL2		ENY2
																								ANKRD27		DEPTOR
																								PDCD2L		DSCC1
																								NFKBID		DERL1
																								CEP89		PLEKHF2
																								ZNF382		NIPAL2
																								ZNF566		BAALC
																								ALKBH6		GRHL2
																								RHPN2		SLC25A32
																								ZNF30		TM7SF4
																								C19orf40		NACAP1
																								TDRD12		NCALD
																								ZNF461		UTP23
																								DMKN		C8orf76
																								DKFZp566F0947		NUDCD1
																								ARHGAP33		FAM83A
																								WDR88		TSPYL5
																								WTIP		MED30
																								ZNF792		MTDH
																								HSPB6		PKHD1L1
																								ZNF565		WDR67
																								DPY19L3		TP53INP1
																								ZNF599		MAL2
																								FAM187B		CSMD3
																								C19orf55		CTHRC1
																								LOC148145		OSR2
																								LOC148189		C8orf38
																								ZNF567		ABRA
																								LGI4		C8orf56
																								C19orf46		ANKRD46
																								THAP8		C8orf37
																								U2AF1L4		VPS13B
																								LOC284395		TMEM74
																								SCGB2B2		SLC30A8
																								WDR62		SNX31
																								ZFP82		C8orf47
																								ZNF181		FBXO43
																								ZNF260		RSPO2
																								VSTM2B		GDF6
																								SBSN		SAMD12
																								RGS9BP		FLJ42969
																								KRTDAP		C8orf85
																								NUDT19		SAMD12-AS1
																								LOC400684		HAS2-AS1
																								LOC400685		C8orf69
																								SCGB1B2P		RAD21-AS1
																								SDHAF1		MIR599
																								LOC644189		MIR875
																								LOC728752		LOC100131726
																								LOC100128675		MIR2053
																								LOC100128682		MIR3150A
																								SCGB2B3P		MIR3151
																								LOC100134317		LOC100499183
																								LOC100505835		LOC100500773
																								LOC100506469		MIR3150B
																								LOC100506930		MIR3610
																								THEG5		ZHX1-C8ORF76
																								LOC100652909		MIR4663
																										MIR4471
																										LOC100616530
																										LINC00536

## Sheet: Primaries_del_genes.conf_90
cytoband	17q11.1	10q11.21	11p15.5	2q21.2	16p11.2	14q32.33	7q22.1	7q11.21	9q13	19p13.3	4p11	15q11.2	2p11.1	9q34.3	14q11.2	4q12	11q12.1	1p11.2	1p36.21	5q22.1	19q13.43	7p22.3	22q13.33	11p15.4	6p11.2	22q11.1	6q27	13q12.11	16p13.3	19q13.2	1p36.13	10q26.3	16q21	20q11.21	20p11.1	7q34	4q35.2	6q21	3p24.3	11p11.2	1p36.32	6p21.32	21q22.3	20p11.1	4p16.3	3q29	8p23.2	5p15.33	7p11.2
q value	3.6131e-18	1.7266e-15	1.6498e-13	9.9646e-11	3.308e-10	3.9181e-08	2.1714e-07	6.2317e-08	3.0852e-06	2.7026e-06	1.9726e-08	2.8092e-05	2.9385e-05	4.7957e-05	8.9379e-05	1.439e-07	2.2404e-05	0.00048933	7.574e-06	0.00072391	0.0012877	0.001995	0.0022579	9.473e-07	0.0042333	0.0060856	0.0067683	0.0073787	0.0075412	0.0084077	0.00025457	0.014237	0.0064257	0.00034106	0.00030852	0.016458	0.01791	0.02762	0.034645	0.00096462	0.00066964	0.045627	0.059312	0.00021533	0.06534	0.073849	0.073944	0.092166	0.0036473
residual q value	3.6131e-18	2.3647e-15	3.4579e-11	9.9646e-11	5.6774e-10	3.9181e-08	2.1714e-07	5.0041e-07	3.0852e-06	3.4687e-06	2.1418e-05	2.7348e-05	2.9385e-05	4.7957e-05	9.0313e-05	0.00022914	0.00022914	0.00048933	0.00056353	0.00074911	0.0012429	0.0020236	0.0023094	0.0028475	0.0041478	0.005831	0.0068106	0.0072221	0.0072221	0.0080746	0.013223	0.014621	0.014621	0.014621	0.015395	0.016544	0.01791	0.02762	0.034645	0.034645	0.04052	0.04433	0.061469	0.061956	0.065787	0.073849	0.073849	0.092317	0.10537
wide peak boundaries	chr17:21209913-25626639	chr10:38681867-42832577	chr11:976121-1247857	chr2:132887944-133489600	chr16:33066606-48122581	chr14:106737530-107349540	chr7:100465079-100676408	chr7:57206822-63721250	chr9:43998515-67024648	chr19:3159007-4239072	chr4:44726888-54968179	chr15:23446681-26095493	chr2:91841937-96012735	chr9:136328658-139309270	chr14:1-20295833	chr4:44996797-55097895	chr11:51403219-55799505	chr1:120611716-142670768	chr1:13104397-13354052	chr5:108516630-110446740	chr19:57522481-57838732	chr7:1-7613797	chr22:43537628-51304566	chr11:4711668-6478813	chr6:57029510-63989609	chr22:1-17072968	chr6:135553955-171115067	chr13:19577508-19999926	chr16:1286179-1368273	chr19:43311976-43857716	chr1:16730309-35449538	chr10:134259575-135534747	chr16:59780733-68886869	chr20:26189081-29651805	chr20:25479059-26059091	chr7:141875672-142610598	chr4:187640967-191154276	chr6:109483336-109696431	chr3:1-27263175	chr11:48346917-48514295	chr1:1542942-7836887	chr6:32525675-32605256	chr21:45757889-46240444	chr20:25773725-29611904	chr4:1-3949274	chr3:195451604-195596906	chr8:1-6263198	chr5:1-5431807	chr7:50859671-56564114
genes in wide peak	KCNJ12	LOC399744	MUC2	hsa-mir-663b	hsa-mir-1826	LINC00226	ACHE	hsa-mir-4283-2	FAM75A7	hsa-mir-637	CNGA1	IPW	MAL	COL5A1	OR11H2	CNGA1	OR5I1	hsa-mir-3118-1	PRAMEF5	hsa-mir-548f-3	AURKC	hsa-mir-589	hsa-mir-3201	APBB1	hsa-mir-548u	POTEH	hsa-mir-1913	TUBA3C	TPSAB1	PSG1	hsa-mir-552	hsa-mir-202	hsa-mir-328	MLLT10P1	ZNF337	EPHB6	FRG1	CCDC162P	hsa-mir-3135	OR4A47	hsa-mir-4252	HLA-DRB1	SUMO3	hsa-mir-663	hsa-mir-943	MUC4	hsa-mir-596	hsa-mir-4277	CCT6A
	FAM27L	ACTR3BP5	MUC6	GPR39	PHKB	LINC00221	MUC12	hsa-mir-3147	KGFLP1	DAPK3	GABRA2	NDN	ZNF2	DBH	POTEG	GABRA2	OR5L2	FCGR1B	PRAMEF3	MAN2A1	ZNF264	hsa-mir-339	hsa-let-7b	CCKBR	PRIM2	OR11H1	hsa-mir-1202	PHF2P1	TPSD1	PSG2	hsa-mir-4254	ADAM8	AGRP	FRG1B	NANP	PRSS1	HSP90AA4P		hsa-mir-563	OR4C45	hsa-mir-551a		TRPM2	NCOR1P1	hsa-mir-571		CLN8	NDUFS6	EGFR
	FLJ36000			LYPD1	DNAJA2		SRRT	ZNF716	FAM74A4	EEF2	GABRA4	SNRPN	MRPS5	SARDH	OR11H12	GABRA4	TRIM48	HIST2H2BA	LOC440563	PJA2	ZNF460	ACTB	hsa-mir-1249	CNGA4	BAG2		hsa-mir-1273c	LINC00442		PSG4	hsa-mir-1976	CYP2E1	CA7		FAM182B	PRSS2	DUX4		hsa-mir-3134		hsa-mir-4251		UBE2G2	FAM182A	ADD1		MYOM2	SDHA	GBAS
	C17orf51			ANKRD30BL	ORC6		UFSP1	ZNF727	LOC442421	MATK	GABRB1	UBE3A	ZNF514	FCN1	OR4Q3	GABRB1	OR4P4	EMBP1	PRAMEF22	TSLP	USP29	GNA12	ACR	HBB	RAB23		hsa-mir-3145	ANKRD26P3		PSG5	hsa-mir-3115	ECHS1	CBFB		LOC100134868	TRPV6	DUX2		hsa-mir-4270		CDK11B		TSPEAR	LOC284801	ADRA2C		DLGAP2	SLC6A3	HPVC1
	KCNJ18			MIR663B	TP53TG3			GUSBP10	FAM27A	NFIC	GABRG1	MKRN3	LOC90499	FCN2	OR4M1	GABRG1	OR4C15	FAM72B		SLC25A46	ZIM3	GPER	ARSA	HBBP1	KHDRBS2		hsa-mir-548a-2	LINC00421		PSG6	hsa-mir-4253	INPP5A	CDH1			PRSS58	ZFP42		hsa-mir-885		DFFB		LRRC3	MIR663A	ATP5I		ARHGEF10	SLC9A3	PHKG1
	MTRNR2L1				VPS35			LOC643955	LOC643648	MAP2K2	SGCB	PAR5	TEKT4	LCN1	POTEM	SGCB	OR4A5			TMEM232	ZNF805	LFNG	TSPO	HBD	GUSBP4		ACAT2			PSG7	hsa-mir-1256	UTF1	CDH3			TRY6	TRIML2		ATP2B2		MEGF6		C21orf90	LOC100134868	CTBP1		KBTBD11	TERT	PSPH
	MIR4522				SHCBP1			ZNF735	FAM74A2	TBXA2R	TEC	SNURF	PROM2	PAEP	LOC642426	TEC	OR4A16			LOC100289673	DUXA	NUDT1	MPPED1	HBE1			CCR6			PSG9	hsa-mir-1290	TUBGCP2	CDH5			LOC730441	LOC339975		BTD		GABRD		KRTAP12-2		DGKQ		FBXO25	TRIP13	COBL
					ITFG1			LOC100287704	FAM75A5	S1PR4	TXK	C15orf2	ACTR3BP2	RXRA		TXK	OR4A15					PDGFA	CHKB	HBG1			ESR1			PSG11	AK2	DUX4	CDH8			MOXD2P	TRIML1		CAV3		GNB1		KRTAP12-1		FGFR3		CSMD1	PDCD6	SEC61G
					NETO2			LOC100287834	FAM27C	APBA3	CORIN	MAGEL2	LOC442028	SNAPC4		CORIN	SPRYD5					PMS2	CPT1B	HBG2			FUCA2			PRG1	ALPL	DUX2	CDH11			MTRNR2L6	LOC401164		DAZL		ZBTB48		KRTAP10-10		GAK		C8orf42	SLC12A7	SUMF2
					GPT2			MIR4283-2		EBI3	DCUN1D4	SNORD107	GGT8P	VAV2		DCUN1D4	OR4C46					PRKAR1B	TYMP	HPX			GPR31			LOC284344	BAI2	VENTX	CDH16				DUX4L4		FANCD2		PEX10		KRTAP10-4		GRK4		ERICH1	TPPP	CHCHD2
					MYLK3			MIR4283-1		HMG20B	CHIC2	PAR1	ANKRD20A8P	BRD3		CHIC2	OR4C16					RAC1	FBLN1	SMPD1			GRM1			PSG10P	C1QA	CALY	CTRL				FRG2		FBLN2		PRKCZ		KRTAP10-6		HTT		ZNF596	EXOC3	MRPS17
					ANKRD26P1			MIR3147		ZFR2	OCIAD1	SNORD108		LHX3		OCIAD1	OR4C11					FSCN1	PPARA	TRIM22			HIVEP2			LOC100289650	C1QB	TTC40	DYNC1LI2				DUX4L6		GRM7		RPL22		KRTAP10-7		HGFAC		LOC286083	PP7080	LANCL2
					LOC146481			LOC100506050		PIP5K1C	COMMD8	SNORD109A		ADAMTSL2		COMMD8	OR4S2					ZNF12	MAPK11	OR52A1			IFNGR1				C1QC	GPR123	E2F4				DUX4L5		HRH1		SKI		KRTAP10-9		IDUA		OR4F21	IRX4	VOPP1
					LOC283914					SNORD37	ATP10D	SNORD109B		PPP1R26		ATP10D	OR4C6					AIMP2	MAPK12	UBQLN3			IGF2R				CAPZB	NKX6-2	HSD11B2				DUX4L3		IL5RA		TP73		KRTAP10-1		LETM1		RPL23AP53	CEP72	VSTM2A
					C16orf87					TJP3	DANCR	SNORD115-1		UBAC1		DANCR	OR5D14					MAFK	SBF1	TRIM34			KIF25				RUNX3	KNDC1	HSF4				DUX4L2		IRAK2		MMP23B		KRTAP10-11		LRPAP1		MIR596	AHRR	POM121L12
					LOC390705					ITGB1BP3	SLAIN2	SNORD64		OLFM1		SLAIN2	OR5L1					MAD1L1	UPK3A	MMP26			LPA				CDA	MTG1	LCAT				LOC100288255		ITPR1		MMP23A		KRTAP10-2		MYL5			MRPL36	LOC285878
					FLJ26245					ZBTB7A	USP46	PAR4		SDCCAG3		USP46	OR5D18					EIF3B	WNT7B	OR51G1			MAS1				CDC42	SYCE1	NFATC3						OGG1		KCNAB2		KRTAP10-5		PDE6B			BRD9	2020-09-14
					UBE2MP1					FZR1	RASL11B	PAR-SN		WDR5		RASL11B	OR7E5P					CYTH3	CELSR1	OR51B4			MAP3K4				CD52	PRAP1	PSKH1						OXTR		TNFRSF25		KRTAP10-8		RGS12			IRX1	ZNF713
					LINC00273					SIRT6	CWH43	LOC653061		SLC2A6		CWH43	OR5AS1					KIAA0415	PPP6R2	OR51B2			MAP3K5				RCC1	ZNF511	PSMB10						PPARG		TNFRSF14		KRTAP10-3		RNF4			ZDHHC11	FKBP9L
					TP53TG3C					PIAS4	FIP1L1	SNORD116-19		GPSM1		FIP1L1	OR10AG1					KDELR2	ZBED4	OR52N1			MLLT4				CNR2	PAOX	RRAD						RAB5A		PLCH2		KRTAP12-3		SH3BP2			LPCAT1	LOC389493
					TP53TG3B					NCLN	LNX1	PWRN1		DKFZP434A062		LNX1	OR5F1					ADAP1	SCO2	OR51G2			NMBR				COL16A1	C10orf125	SLC9A5						RAF1		CEP104		KRTAP12-4		WHSC1			CLPTM1L	FLJ45974
					LOC100130700					C19orf29	OCIAD2	PWRN2		OBP2A		OCIAD2	OR5D13					IQCE	PKDREJ	FAM160A2			OPRM1				DDOST	LOC399829	SLC12A4						RARB		KLHL21		KRTAP10-12		WHSC2			NKD2	LOC650226
										CELF5	SPATA18	SNORD116-1		MRPS2		SPATA18	OR5D16					SUN1	NUP50	TRIM5			PARK2				E2F2	SPRNP1	TK2						RPL15		SLC35E2				ZNF141			C5orf55	SNORA15
										DOHH	NFXL1	SNORD116-2		KCNT1		NFXL1	OR5W2					WIPI2	RABL2B	PRKCDBP			PCMT1				ECE1	FRG2B	TRADD						RPL32		RER1				SLBP			CCDC127
										CREB3L3	NIPAL1	SNORD116-3		CARD9		NIPAL1	LOC440041					INTS1	GRAMD4	TRIM78P			PDCD2				PHC2	SPRN	CES2						SATB1		ACOT7				NOP14			PLEKHG4B
										RAX2	LOC152578	SNORD116-4		C9orf69		LOC152578						EIF2AK1	TTLL12	TRIM6			PEX7				EPB41	MIR202	NAE1						SEC13		CAMTA1				FAM193A			C5orf38
										ATCAY	SCFD2	SNORD116-5		NACC2		SCFD2						SNX8	MLC1	OR52E2			PLAGL1				EPHA8	LOC619207	NOL3						SETMAR		ICMT				MFSD10			IRX2
										MRPL54	COX7B2	SNORD116-6		C9orf116		COX7B2						FTSJ2	KIAA0930	OR52J3			PLG				EPHB2	DUX4L7	SLC7A6						SLC6A1		CHD5				MAEA			ADAMTS16
										MFSD12	GSX2	SNORD116-7		CAMSAP1		GSX2						GET4	MAPK8IP2	OR51L1			PSMB1				EXTL1	DUX4L6	ATP6V0D1						SLC6A6		ARHGEF16				PCGF3			LOC285577
										GIPC3	SLC10A4	SNORD116-8		QSOX2		SLC10A4						CCZ1	PLXNB2	OR51A7			RPS6KA2				EYA3	DUX4L5	NUTF2						SLC6A11		WRAP73				SPON2			SLC6A19
										ANKRD24	FRYL	SNORD116-9		LINC00094		FRYL						RNF216	BRD1	OR51S1			SLC22A1				FABP3	DUX4L3	CTCF						SYN2		HES2				TACC3			LOC340094
										C19orf77	ZAR1	SNORD116-10		GLT6D1		ZAR1						ZNF853	ARHGAP8	OR51F2			SLC22A3				FGR	DUX4L2	CES3						THRB		PANK4				MXD4			SLC6A18
										C19orf29-AS1	LRRC66	SNORD116-11		TMEM8C		LRRC66						CYP2W1	TBC1D22A	OR52R1			SLC22A2				FUCA1	MIR3944	EDC4						TIMP4		DNAJC11				CPLX1			LRRC14B
										MIR637	RPL21P44	SNORD116-12		LCN9		RPL21P44						HEATR2	SAMM50	OR52W1			SOD2				IFI6		PLA2G15						TOP2B		AJAP1				SLC26A1			SDHAP3
										C19orf71	SNORA26	SNORD116-13		LOC401557		SNORA26						ZDHHC4	ATXN10	OR56A4			T				GALE		PLEKHG4						NR2C2		TP73-AS1				FGFRL1			LOC728613
											ERVMER34-1	SNORD116-14		SOHLH1		ERVMER34-1						CHST12	FAM19A5	OR56A1			TBP				GJA4		LRRC29						UBE2E1		PLEKHG5				PIGG			MIR4277
											MIR4449	SNORD116-15		FAM163B		MIR4449						RADIL	SULT4A1	UBQLNL			TCP1				GJB3		TMEM208						UBE2E2		LRRC47				KIAA1530			LOC100506688
												SNORD116-16		DNLZ								PAPOLB	RIBC2	C11orf42			TCP10				GJB5		FHOD1						VHL		PRDM16				ZFYVE28			MIR4457
												SNORD116-17		LOC100130954								C1GALT1	SMC1B	OR56B4			TCTE3				SFN		ZDHHC1						WNT7A		NADK				TNIP2			MIR4456
												SNORD116-18		RNU6ATAC								FAM20C	PARVB	OR52B2			DYNLT1				GPR3		PARD6A						XPC		MMEL1				HAUS3			MIR4635
												SNORD116-20		MIR3689A								RBAK	NCAPH2	OR51F1			THBS2				HCRTR1		CKLF						BRPF1		NOL9				ABCA11P
												SNORD116-21		MIR3689B								C7orf26	GTSE1	OR51B5			TNFAIP3				HDAC1		FAM96B						COLQ		MORN1				MFSD7
												SNORD116-22		LOC100506599								MICALL2	MOV10L1	OR51V1			UTRN				HMGN2		TPPP3						CAMK1		TAS1R1				TMEM175
												SNORD116-23		MIR3689D1								FBXL18	FAM118A	OR52L1			EZR				HMGCL		PRMT7						BHLHE40		ESPN				C4orf42
												SNORD116-24		MIR3689F								TTYH3	TTC38	OR52B6			VIP				HPCA		DUS2L						KAT2B		KIAA1751				TMEM129
												SNORD116-25		MIR4669								USP42	C22orf26	OR56B1			EPM2A				HSPG2		LRRC36						SH3BP5		THAP3				ZNF595
												SNORD115-2		MIR3689C								PSMG3	MIOX	OR52A5			PEX3				HTR1D		FBXL8						VGLL4		LOC115110				FAM53A
												SNORD116-26		MIR3689D2								C7orf50	PRR5	OR51B6			RNASET2				HTR6		SMPD3						EDEM1		TPRG1L				ZNF721
												SNORD116-27		MIR3689E								CARD11	TRMU	OR51M1			STX11				ID3		DDX28						TBC1D5		FAM213B				ZNF718
												SNORD115-3										TNRC18	PANX2	OR51Q1			SYNJ2				STMN1		TSNAXIP1						TATDN2		ACTRT2				CRIPAK
												SNORD115-4										C7orf70	PARVG	OR51I1			MAP7				LCK		THAP11						SRGAP3		MIB2				DOK7
												SNORD115-5										ZFAND2A	CERK	OR51I2			LATS1				MATN1		PDP2						IQSEC1		PHF13				FLJ35424
												SNORD115-6										COX19	EFCAB6	OR52D1			QKI				MFAP2		RANBP10						NR1D2		CCDC27				RNF212
												SNORD115-7										KIAA1908	ALG12	OR52H1			WTAP				NBL1		DPEP2						ARPC4		CALML6				C4orf10
												SNORD115-8										GPR146	CRELD2	OR52N4			AKAP12				OPRD1		DPEP3						TADA3		C1orf86				NAT8L
												SNORD115-9										AMZ1	ADM2	OR52N5			PHACTR2				PAFAH2		ACD						ATG7		NPHP4				C4orf44
												SNORD115-10										TMEM184A	SCUBE1	OR52N2			BCLAF1				PAX7		FAM65A						CHL1		LOC284661				POLN
												SNORD115-11										BRAT1	TRABD	OR52E6			UST				PLA2G2A		ELMO3						CAND2		C1orf174				C4orf48
												SNORD115-12										SDK1	PNPLA3	OR52E8			CITED2				PLA2G5		ESRP2						RFTN1		TMEM52				LOC402160
												SNORD115-13										FOXK1	SELO	OR52E4			PDE10A				PPP1R8		CENPT						NUP210		GPR153				ZNF876P
												SNORD115-14										MMD2	HDAC10	OR56A3			RAB32				PTAFR		C16orf70						PLCL2		HES5				ZNF732
												SNORD115-15										DAGLB	LDOC1L	OR56A5			KATNA1				RAP1GAP		GFOD2						ANKRD28		LOC388588				SCARNA22
												SNORD115-16										CCZ1B	KIAA1644	OR51T1			FGFR1OP				RBBP4		C16orf48						CAPN7		RNF207				MIR943
												SNORD115-17										SLC29A4	SHANK3	OR51A4			SCAF8				RHCE		SLC7A6OS						MKRN2		HES3				LOC100129917
												SNORD115-18										RSPH10B	TUBGCP6	OR51A2			TAB2				RHD		B3GNT9						THUMPD3		FLJ42875				LOC100130872
												SNORD115-19										TFAMP1	LOC90834	TRIM6-TRIM34			SASH1				RPA2		CMTM1						HACL1		MIR551A				LOC100133461
												SNORD115-20										UNCX	LMF2				SYNE1				RPL11		NRN1L						TTLL3		CDK11A				TMED11P
												SNORD115-21										COL28A1	PHF21B				HEBP2				RPS6KA1		CMTM3						CNTN6		SLC35E2B				MIR4800
												SNORD115-22										LOC389458	KLHDC7B				CCDC28A				SDHB		ZFP90						LSM3		LOC728716				HTT-AS1
												SNORD115-23										ELFN1	PNPLA5				MTHFD1L				SRSF4		RLTPR						NKIRAS1		LOC100129534
												SNORD115-25										GRID2IP	LOC150381				IPCEF1				SLC9A1		KCTD19						LINC00312		LOC100133445
												SNORD115-26										ZNF815	C22orf40				TIAM2				TAF12		CMTM4						LMCD1		LOC100133612
												SNORD115-29										RNF216P1	CN5H6.4				C6orf123				TCEA3		CMTM2						C3orf32		TTC34
												SNORD115-30										PMS2CL	LOC284933				FBXO5				TCEB3		BEAN1						TRNT1		MIR4251
												SNORD115-31										FLJ44511	RPL23AP82				RGS17				ZSCAN20		CCDC79						CRBN		MIR4252
												SNORD115-32										LOC442497	LOC339685				PDE7B				SLC30A2		CES4A						C3orf19		MIR4689
												SNORD115-33										MIR339	C22orf34				DLL1				LUZP1		EXOC3L1						GHRL		MIR4417
												SNORD115-34										ZNF890P	CHKB-CPT1B				MRPL18				LAPTM5		LOC283867						OXSM
												SNORD115-35										OCM	LINC00207				CLDN20				PTP4A2		C16orf86						ARL8B
												SNORD115-36										MIR589	MIRLET7BHG				NOX3				ARID1A		MIR328						SETD5
												SNORD115-37										RSPH10B2	FLJ46257				TFB1M				SNHG3		LOC644649						TMEM40
												SNORD115-38										LOC100131257	IL17REL				AIG1				NR0B2		KIAA0895L						NGLY1
												SNORD115-39										LOC100288524	MIRLET7A3				SNX9				FCN3		LOC100505865						TMEM111
												SNORD115-40										RBAK-LOC389458	MIRLET7B				VTA1				YARS		CKLF-CMTM1						BRK1
												SNORD115-41										MIR4648	LINC00229				BRP44L				AKR7A2								RAD18
												SNORD115-42										MIR4655	FAM116B				HECA				ALDH4A1								LRRN1
												SNORD115-43										MIR4656	PIM3				IL20RA				EIF3I								CIDEC
												SNORD115-44											ODF3B				UNC93A				EIF4G3								ZFYVE20
												SNORD116-28											PRR5-ARHGAP8				MTRF1L				MAP3K6								MTMR14
												SNORD116-29											SYCE3				AHI1				SNRNP40								MRPS25
												SNORD115-48											LOC730668				RMND1				C1orf38								CRELD1
												SNORD115-24											LOC100128946				PHF10				SDC3								TMEM43
												SNORD115-27											LOC100144603				C6orf70				CROCC								ZNF385D
												SNORD115-28											LOC100271722				AGPAT4				PUM1								HDAC11
												SNORD115-45											MIR1249				TULP4				ZBTB40								TSEN2
												SNORD115-47											MIR3201				HYMAI				PTPRU								GRIP2
												MIR4508											MIR3619				GPR126				CELA3A								C3orf20
												MIR4715											LOC100506714				KIAA1244				WASF2								JAGN1
																							MIR4763				NHSL1				HNRNPR								GHRLOS2
																							MIR4762				PLEKHG1				SRRM1								IL17RC
																							MIR4535				ARID1B				CNKSR1								EAF1
																											TMEM181				KHDRBS1								OXNAD1
																											ZBTB2				GMEB1								C3orf24
																											C6orf115				NUDC								LRRC3B
																											PBOV1				SRSF10								GALNTL2
																											PERP				RCAN3								KCNH8
																											SMOC2				MST1P2								CHCHD4
																											ULBP3				MST1P9								METTL6
																											C6orf211				PADI2								TAMM41
																											ZDHHC14				LYPLA2								IL17RE
																											ADGB				DNAJC8								SGOL1
																											FRMD1				AKR7A3								PP2D1
																											AGPAT4-IT1				KDM1A								EFHB
																											C6orf208				WDTC1								CPNE9
																											C6orf97				KIAA0090								LOC152024
																											MYCT1				OTUD3								FGD5
																											ULBP2				UBR4								CIDECP
																											ULBP1				ATP13A2								CNTN4
																											LPAL2				CELA3B								LOC285326
																											PPP1R14C				PADI4								SUMF1
																											SF3B5				TMEM50A								RPUSD3
																											RSPH3				KPNA6								PRRT3
																											TTLL2				STX12								LOC285370
																											FBXO30				CLIC4								LOC285375
																											FAM120B				SYF2								DPH3
																											FNDC1				LDLRAP1								LOC339862
																											LRP11				PLA2G2D								COL6A4P1
																											LTV1				RNU11								TPRXL
																											SERAC1				AHDC1								LHFPL4
																											REPS1				SMPDL3B								VENTXP7
																											PPIL4				PRO0611								LOC401052
																											LINC00473				LINC00339								LOC440944
																											SYTL3				PADI1								SNORA7A
																											FAM54A				PLA2G2E								LOC644990
																											SFT2D1				HP1BP3								MIR563
																											C6orf72				ZNF593								MIR885
																											IL22RA2				MECR								EGOT
																											TAGAP				MRTO4								GHRLOS
																											ADAT2				YTHDF2								LOC100129480
																											STXBP5				ZCCHC17								LOC100132526
																											PACRG				PADI3								LOC100288428
																											RAET1E				WNT4								MIR4270
																											LOC153910				RNF186								MIR3714
																											ZC2HC1B				GPN2								FGD5-AS1
																											CNKSR3				MED18								LOC100505696
																											RAET1L				PQLC2								LOC100507582
																											PNLDC1				TRNAU1AP								ARPC4-TTLL3
																											LOC154449				AIM1L								MIR4791
																											OLIG3				BSDC1								MIR4790
																											TXLNB				XKR8								MIR548AC
																											DACT2				TMEM39B								MIR4792
																											C6orf118				ARHGEF10L								MIR4442
																											OSTCP1				TMEM57
																											WDR27				TRIM62
																											SHPRH				CAMK2N1
																											LOC285740				ASAP3
																											LOC285796				PNRC2
																											PRR18				PIGV
																											SLC35D3				NBPF1
																											ZC3H12D				NECAP2
																											ECT2L				IQCC
																											NUP43				RCC2
																											RAET1G				TMEM234
																											SUMO4				FAM54B
																											C6orf120				C1orf63
																											SAMD5				PITHD1
																											IYD				MAN1C1
																											DKFZp451B082				NIPAL3
																											TCP10L2				SEPN1
																											LINC00242				KIF17
																											GTF2H5				KIAA1522
																											FLJ46906				GRHL3
																											LOC441177				DLGAP3
																											LOC645434				IL22RA1
																											RAET1K				GPATCH3
																											MLLT4-AS1				TINAGL1
																											SNORA20				PLA2G2F
																											SNORA29				S100PBP
																											LOC729176				CEP85
																											LOC729178				PINK1
																											TMEM242				MARCKSL1
																											LOC729603				PHACTR4
																											HGC6.3				C1orf135
																											LOC100128176				CCDC28B
																											LOC100129518				NKAIN1
																											C6orf99				MUL1
																											LINC00271				LIN28A
																											LOC100132735				FAM110D
																											LOC100289495				DHDDS
																											NHEG1				ZNF436
																											MIR1913				TAS1R2
																											MIR3145				SYNC
																											MIR3918				ACTL8
																											MIR3939				TSSK3
																											MIR3668				SH3BGRL3
																											MIR3692				SESN2
																											LOC100507462				TMEM222
																											LOC100507489				USP48
																											LOC100507557				NBPF3
																											CAHM				ZDHHC18
																											MIR4466				TRIM63
																											MIR4465				FAM167B
																											MIR4644				CROCCP2
																											LOC100652739				SYTL1
																															IGSF21
																															C1orf94
																															SNHG12
																															C1orf201
																															SPOCD1
																															UBXN11
																															ATPIF1
																															C1orf212
																															ADC
																															TMEM54
																															CSMD2
																															CROCCP3
																															RAB42
																															FAM46B
																															C1orf172
																															IFFO2
																															MYOM3
																															GJB4
																															HMGB4
																															RNF19B
																															KLHDC7A
																															VWA5B1
																															UBXN10
																															C1orf213
																															DCDC2B
																															ZNF362
																															LOC149086
																															PDIK1L
																															IL28RA
																															FAM43B
																															PAQR7
																															FAM76A
																															TXLNA
																															AKR7L
																															FNDC5
																															TMCO4
																															ZNF683
																															MDS2
																															LOC284551
																															LOC284632
																															ESPNP
																															MTMR9LP
																															ZBTB8OS
																															LOC339505
																															SERINC2
																															PADI6
																															CATSPER4
																															TRNP1
																															CD164L2
																															PLA2G2C
																															TMEM200B
																															SH2D5
																															C1orf130
																															LDLRAD2
																															LOC402779
																															MINOS1
																															PEF1
																															LOC644961
																															LOC646471
																															ZBTB8A
																															LOC653160
																															LOC653566
																															SCARNA1
																															SNORA44
																															SNORA61
																															SNORA16A
																															SNORD85
																															SNORD99
																															SNORD103A
																															SNORD103B
																															ZBTB8B
																															LOC729059
																															LOC100128071
																															LOC100129196
																															MIR1976
																															MIR3115
																															MIR4253
																															MIR4254
																															MIR3917
																															MIR3605
																															MIR3675
																															LOC100506730
																															LOC100506801
																															LOC100506963
																															C1orf151-NBL1
																															MIR4695
																															MIR4420
																															MIR4684
																															MIR378F
																															RCAN3AS
[truncated: 10 more columns]

## Sheet: Recurrence_amp_genes.conf_90
cytoband	1q21.1	14q11.2	1p36.13	15q26.3	8q24.22	20q11.21	9q13	4p11	7p11.2	10q11.21	22q11.21	1q21.2	6p21.32	3q26.2	12q12	3q29	17q11.2	8p23.1	18p11.21	2q11.1	9p11.2	15q26.1	1p36.21	16p11.2	22q11.21	2q21.2	20p11.1	2q13	11p11.2	1q21.1	6p22.3	13q14.2	5p13.2	9p13.2	12q14.2	2q24.2	1q42.2	4q35.2	7q36.1	17q24.1	2p21	8q21.13	20q13.33	7p12.1	17p12	2q21.1	7q11.23	6q23.2	16p13.11
q value	7.5577e-13	8.6685e-11	1.0507e-09	8.3838e-10	5.5932e-09	6.8272e-09	3.0488e-09	6.1103e-08	1.2853e-07	4.4722e-06	4.4722e-06	3.0488e-09	8.9915e-06	8.515e-06	2.6363e-05	9.5149e-06	7.2635e-05	7.5689e-05	7.5689e-05	3.5244e-05	2.9771e-06	4.4847e-05	0.00081685	0.0019722	0.0018666	0.003095	0.0028581	0.002951	0.018298	4.0412e-07	0.014904	0.024797	0.029731	0.011319	0.04361	0.032082	0.050031	0.059416	0.060278	0.0051143	0.069637	0.069637	0.073499	0.048598	0.094755	0.027906	0.059416	0.13062	0.17783
residual q value	7.1298e-12	8.6685e-11	1.3803e-09	5.0319e-09	5.5932e-09	1.755e-08	4.5271e-08	6.1103e-08	2.9244e-07	4.4722e-06	6.8127e-06	9.3485e-06	1.101e-05	2.381e-05	2.6363e-05	2.6713e-05	7.2635e-05	7.5689e-05	7.5689e-05	0.0001629	0.00049347	0.00074072	0.0011165	0.0019722	0.002951	0.0061369	0.01099	0.016855	0.018298	0.018475	0.018735	0.024797	0.029731	0.035585	0.04361	0.044937	0.050031	0.059416	0.060278	0.06078	0.069637	0.069637	0.073499	0.07773	0.094755	0.10851	0.11084	0.13062	0.17783
wide peak boundaries	chr1:121484600-143767546	chr14:19488020-19866467	chr1:16768942-16916535	chr15:102242084-102531392	chr8:124443994-137563351	chr20:29537945-29612000	chr9:68397167-68409788	chr4:44986924-49151475	chr7:57710101-57882723	chr10:42400576-42596953	chr22:18769204-19174756	chr1:147121777-148873321	chr6:32487145-32525973	chr3:169639691-169876924	chr12:33486549-40937927	chr3:195676508-195710814	chr17:28303271-29854257	chr8:11891777-12237831	chr18:13106532-14542978	chr2:96024788-96601152	chr9:43304328-66352362	chr15:93379902-93496835	chr1:12907830-13943019	chr16:32163526-32893875	chr22:21414461-21993817	chr2:133018828-133020634	chr20:25829436-25900077	chr2:114213286-114364420	chr11:48639783-49002342	chr1:145687238-146512329	chr6:9893921-24188495	chr13:48661588-49628108	chr5:34187533-34766248	chr9:36634175-37495396	chr12:64805160-65612346	chr2:157194485-175721900	chr1:200860990-248560661	chr4:190878598-191154276	chr7:151971093-152382387	chr17:62397018-63643032	chr2:42499378-48722502	chr8:79649229-86393320	chr20:48892375-63025520	chr7:50125742-53255861	chr17:11817402-12616616	chr2:132284719-132542161	chr7:76245965-76721918	chr6:133840115-136599841	chr16:14345973-15106937
genes in wide peak	hsa-mir-3118-3	POTEG	NBPF1	hsa-mir-1302-10	hsa-mir-30d	FRG1B	[LOC642236]	CNGA1	[ZNF716]	[LOC441666]	GGT3P	GJA5	HLA-DRB5	SEC62	ABCD2	SDHAP1	hsa-mir-3184	FAM86B1	C18orf1	KCNIP3	FAM75A7	hsa-mir-3175	PDPN	TP53TG3	UBE2L3	[ANKRD30BL]	[FAM182B]	hsa-mir-1302-3	LOC120824	PDZK1	hsa-mir-548a-1	RCBTB2	RAI14	PAX5	hsa-mir-548c	ACVR1	hsa-mir-3123	FRG1	XRCC2	hsa-mir-4315-2	hsa-mir-559	CA1	hsa-mir-647	DDC	hsa-mir-744	C2orf27A	POMZP3	hsa-mir-548a-2	hsa-mir-1972-1
	hsa-mir-3118-2		NECAP2	OR4F4	hsa-mir-1208			GABRA2			GSC2	GJA8	HLA-DRB6	GPR160	KIF21A		BLMH	DEFB130	MC2R	FAHD2A	KGFLP1	CHD2	PRAMEF2	SLC6A10P	HIC2			DDX11L2		CD160	E2F3	RB1		GRHPR	GNS	CHN1	hsa-mir-1537	DUX4	MLL3	DDX5	ZFP36L2	CA2	hsa-mir-4326	GRB10	DNAH9	CCDC74A	DTX2P1-UPK3BP1-PMS2P11	EYA4	hsa-mir-3180-1
	hsa-mir-3118-1		CROCCP3	TARSL2	hsa-mir-1207			GABRA4			PRODH	NBPF14		PHC3	ALG10		CPD	USP17L2	MC5R	TRIM43	FAM75A6	MIR3175	LRRC38	LOC390705	POM121L8P			CBWD2		RNF115	EDN1	ITM2B		MELK	WIF1	CHRNA1	hsa-mir-1182	DUX2	FABP5P3	PECAM1	CALM2	CA3	hsa-mir-124-3	IKZF1	MAP2K4	POTEKP	LOC100132832	MYB	hsa-mir-365-1
	LOC375010		MIR3675	WASH3P	hsa-mir-1205			GABRB1			SLC25A1	ACP6		SAMD7	SLC2A13		EVI2A	LOC392196	RNMT	TRIM43B	FAM74A4	LOC100507217	PRAMEF5	HERC2P4	RIMBP3C			FOXD4L1		NBPF11	GCNT2	LPAR6		ZBTB5	XPOT	DLX1	hsa-mir-320b-2	DUX4L4	LOC100128822	AXIN2	EPAS1	E2F5	hsa-mir-133a-2	ZPBP	ZNF18		LOC100133091	SGK1	PARN
	FLJ39739			OR4F6	hsa-mir-1204			GABRG1			DGCR6	GPR89B		LOC100128164	LRRK2		EVI2B	ZNF705D	CEP192		FAM27A		HNRNPCL1	TP53TG3C	YDJC			WASH2P		GPR89A	GMPR	FNDC3A		POLR1E	TBC1D30	DLX2	hsa-mir-664	FRG2		RGS9	MSH6	FABP4	hsa-mir-3195	COBL	MYOCD			TCF21	PLA2G10
	PPIAL4G			OR4F15	ADCY8			TEC			CLTCL1	PPIAL4A			ALG10B		NF1	FAM66D	FAM210A		LOC643648		PRAMEF9	LOC729264	CCDC116			FAM138B		NBPF24	HIVEP1	MED4		ZCCHC7	LEMD3	DYNC1I2	hsa-mir-194-1	DUX4L6		GNA13	FOXN2	FABP5	hsa-mir-1257	FIGNL1	FLJ34690			TBPL1	NPIP
	LOC100130000			FAM138E	ANXA13			TXK			DGCR14	NBPF11			CPNE8		OMG	FAM66A	ZNF519		FAM74A2		PRAMEF10	TP53TG3B	PI4KAP2					GPR89C	ID4	CYSLTR2		LOC100506710	TBK1	DPP4	hsa-mir-3122	DUX4L5		POLG2	EPCAM	IL7	hsa-mir-646	POM121L12	MIR744			BCLAF1	PDXDC1
	LOC100286793			GPCRLTM7	KCNQ3			CORIN			DGCR2	NBPF15			C12orf40		SH3GL1P2	LOC100133267	CYP4F35P		FAM75A5		PRAMEF21		LOC400891					PDZK1P1	JARID2			MIR4540	RASSF3	FAP	hsa-mir-4260	DUX4L3		SMURF2	MSH2	IMPA1	hsa-mir-298	LOC100129427				HBS1L	NOMO1
				DDX11L1	MYC			OCIAD1			TSSK2	FLJ39739			SYT10		SLC6A4		POTEC		CNTNAP3B		PRAMEF8		BCRP2					LOC728989	MAK			MIR4475	FLJ41278	GAD1	hsa-mir-205	DUX4L2		CEP95	PIGF	PMP2	hsa-mir-4325	C7orf72				PDE7B	BFAR
				DDX11L9	NDUFB9			COMMD8			DGCR11	PPIAL4D					GOSR1		CXADRP3		FAM27C		PRAMEF18		RIMBP3B						NEDD9			MIR4476	MIR548C	GALNT3	hsa-mir-29b-2	LOC100288255		LOC146880	PPM1B	TPD52	hsa-mir-1302-5					AHI1	MKL2
					POU5F1B			ATP10D			DGCR9	PPIAL4B					TBC1D29		ANKRD20A5P				PRAMEF17		TMEM191C						PRL				MIR548Z	GCG	hsa-mir-135b			CEP112	PRKCE	STMN2	hsa-mir-3194					ALDH8A1	MIR193B
					PVT1			SLAIN2			DGCR5	NBPF24					CRLF3		LOC100288122				PRAMEF4								ATXN1					GPD2	hsa-mir-1231			AMZ2P1	SIX3	HEY1	ATP5E					FAM54A	ABCC6P2
					ST3GAL1			CWH43			DGCR10	GPR89C					ADAP2		MIR4526				PRAMEF13								SOX4					GRB14	ACTA1			MILR1	SLC3A1	MRPS28	BMP7					MGC34034	MIR365A
					SLA			OCIAD2				NBPF16					TEFM						PRAMEF3								TFAP2A					ITGA6	ACTN2			LRRC37A3	COX7A2L	PAG1	CDH4					SLC2A12	MIR3180-3
					SQLE			NFXL1				PDZK1P1					ATAD5						PRAMEF6								TPMT					ITGB6	ADORA1			PLEKHM1P	CRIPT	SNX16	CHRNA4					LOC154092	MIR3180-1
					TG			NIPAL1				PPIAL4F					NSRP1						LOC440563								DEK					LRP2	PARP1			MIR4315-2	PREPL	ZBTB10	COL9A3					HMGA1P7	MIR3179-2
					WISP1			COX7B2				PPIAL4E					RNF135						PRAMEF7								GCM2					LY75	ADSS			MIR4315-1	SOCS5	ZFAND1	CSTF1					LINC00271	MIR3180-2
					MTSS1			SLC10A4									RAB11FIP4						PRAMEF19								CD83					PDK1	AGT			MIR3064	LRPPRC	LRRCC1	CTSZ					MIR3662	MIR3179-1
					KIAA0196			FRYL									LRRC37BP1						PRAMEF20								NUP153					RBMS1	ARF1			MIR5047	SIX2	CHMP4C	CYP24A1						MIR3179-3
					HHLA1			ZAR1									EFCAB5						LOC649330								RANBP9					SCN1A	ATF3				RHOQ	RALYL	EDN3
					TRIB1												TMIGD1						PRAMEF22								CAP2					SCN2A	ATP2B4				HAAO	SLC10A5	EEF1A2
					NDRG1												SUZ12P						PRAMEF15								SIRT5					SCN3A	AVPR1B				EML4	CA13	GNAS
					KHDRBS3												MIR423						PRAMEF16								MYLIP					SCN7A	C4BPA				DYNC2LI1	C8orf59	NPBWR2
					RNF139												DPRXP4						PRAMEF14								TBC1D7					SCN9A	C4BPB				SRBD1	ZNF704	KCNG1
					EFR3A												MIR3184														NOL7					SP3	CACNA1S				KCNK12	FABP9	KCNQ2
					LRRC6												MIR4733														FAM8A1					SSB	CAPN2				TTC7A	FABP12	LAMA5
					ASAP1-IT1																										DCDC2					WIPF1	CD34				MTA3		MC3R
					ASAP1																										TMEM14C					PKP4	CENPF				THADA		MYT1
					PHF20L1																										GFOD1					HAT1	CHI3L1				ABCG5		NFATC2
					FAM49B																										ELOVL2					SLC25A12	CHIT1				ABCG8		NTSR1
					TRMT12																										CDKAL1					ABCB11	CHML				CAMKMT		OPRL1
					WDYHV1																										PAK1IP1					B3GALT1	LYST				FBXO11		PCK1
					GSDMC																										CCDC90A					PPIG	CHRM3				MCFD2		PFDN4
					ZFAT																										KIF13A					CIR1	CR1				ATP6V1E2		PPP1R3D
					TATDN1																										TMEM14B					CYTIP	CR1L				PPP1R21		PSMA7
					HPYR1																										DTNBP1					TLK1	CR2				PLEKHH2		PTK6
					FBXO32																										ADTRP					CD302	CSRP1				OXER1		PTPN1
					ZNF572																										NRSN1					TANK	CTSE				KCNG3		RPS21
					TMEM71																										MBOAT1					DHRS9	CD55				C2orf61		SRMS
					TMEM65																										HDGFL1					PSMD14	EIF2D				LOC388946		AURKA
					LOC157381																										KDM1B					KBTBD10	ELF3				LOC388948		TAF4
					FAM84B																										RBM24					TBR1	ELK4				UNQ6975		TCEA2
					FAM91A1																										RNF182					RAPGEF4	EPHX1				MIR559		TFAP2C
					NSMCE2																										PHACTR1					GALNT5	EPRS				LOC728819		TPD52L2
					LOC286094																										C6orf228					COBLL1	ESRRG				LOC100129726		ZNF217
					KLHL38																										SYCP2L					PLA2R1	FH				LOC100134259		RAE1
					MIR30B																										LINC00518					GCA	FMOD				MIR548AD		BCAS1
					MIR30D																										RNF144B					GORASP2	GALNT2						STX16
					FER1L6-AS1																										C6orf52					STK39	GNG4						TNFRSF6B
					ZFAT-AS1																										NHLRC1					METTL5	GUK1						DPM1
					FER1L6																										FLJ23152					OLA1	H3F3A						VAPB
					LOC727677																										LINC00340					BAZ2B	HLX						OSBPL2
					LOC728724																										ERVFRD-1					ZAK	HNRNPU						ATP9A
					OC90																										MIR548A1					FIGN	HSD11B1						ARFRP1
					LOC100130231																										LOC729177					SLC4A10	IL10						RGS19
					MIR1205																										TMEM170B					SPC25	IRF6						SYCP2
					MIR1206																										LOC100130275					ERMN	ITPKB						TCFL5
					MIR1207																										LOC100130357					G6PC2	KCNH1						ADRM1
					MIR1204																										LOC100506409					IFIH1	KCNK1						OGFR
					MIR1208																										MIR4639					2020-03-07	KCNK2						DIDO1
					LOC100507117																															SCRN3	KISS1						HRH3
					PCAT1																															FASTKD1	LAD1						ADNP
																																				TTC21B	LAMB3						SPO11
																																				METTL8	LBR						PRPF6
																																				CYBRD1	LGALS8						SS18L1
																																				CSRNP3	MARK1						GTPBP5
																																				DCAF17	CD46						GMEB2
																																				CDCA7	MDM4						MOCS3
																																				TANC1	MTR						SLCO4A1
																																				KCNH7	MYBPH						STMN3
																																				LOC91149	MYOG						SLMO2
																																				DAPL1	PPP1R12B						TH1L
																																				NOSTRIN	NEK2						C20orf43
																																				XIRP2	NID1						RTEL1
																																				BBS5	NVL						SOX18
																																				C2orf77	CDK18						YTHDF1
																																				ACVR1C	PFKFB2						LIME1
																																				UBR3	PIGR						UCKL1
																																				CCDC148	PIK3C2B						C20orf11
																																				MYO3B	PKP1						PCMTD2
																																				KLHL23	PLXNA2						C20orf20
																																				SLC38A11	PPP2R5A						PPP4R1L
																																				WDSUB1	PRELP						RBM38
																																				UPP2	PROX1						BCAS4
																																				GPR155	PSEN2						ZFP64
																																				CERS6	PTPN7						ARFGAP1
																																				METAP1D	PTPN14						DOK5
																																				LOC285084	RAB4A						SLC2A4RG
																																				MLK7-AS1	RABIF						PMEPA1
																																				SP5	RBBP5						CASS4
																																				LOC440925	REN						SALL4
																																				PHOSPHO2	RGS7						RAB22A
																																				LOC554201	RNPEP						ZNF512B
																																				SP9	RYR2						COL20A1
																																				SNORA70F	SNRPE						CDH26
																																				LOC100505695	SRP9						SLC17A9
																																				LOC100506124	AURKAPS1						LOC63930
																																				LOC100506134	TARBP1						FAM217B
																																				LY75-CD302	CNTN2						C20orf195
																																				PHOSPHO2-KLHL23	TBCE						PPDPF
																																				MIR4774	TGFB2						BIRC7
																																				MIR4785	LEFTY2						NPEPL1
																																				LOC100861402	TLR5						DNAJC5
																																					GPR137B						TUBB1
																																					TNNI1						ZBP1
																																					TNNT2						CABLES2
																																					TP53BP2						PARD6B
																																					TRAF5						ZGPAT
																																					TSNAX						PRIC285
																																					USH2A						FAM210B
																																					WNT9A						PHACTR3
																																					ZNF124						BHLHE23
																																					SLC30A1						NKAIN4
																																					BTG2						TSHZ2
																																					HIST3H3						C20orf85
																																					GNPAT						ZNF831
																																					DYRK3						C20orf166
																																					CDC42BPA						GATA5
																																					PPFIA4						ZBTB46
																																					DEGS1						GCNT7
																																					KMO						CBLN4
																																					RAB7L1						CTCFL
																																					TAF1A						SAMD10
																																					EXO1						ABHD16B
																																					FAIM3						LINC00266-1
																																					MAPKAPK2						FAM65C
																																					GPR37L1						C20orf151
																																					GGPS1						LOC149773
																																					SOX13						GNAS-AS1
																																					IKBKE						LSM14B
																																					TMEM63A						APCDD1L
																																					TOMM20						C20orf201
																																					URB2						FAM209A
																																					CEP170						C20orf166-AS1
																																					ZC3H11A						LINC00176
																																					TMCC2						LOC284751
																																					LPGAT1						C20orf197
																																					AKT3						LOC284757
																																					BPNT1						FAM209B
																																					TIMM17A						SUMO1P1
																																					LRRN2						MIR1-1
																																					ZNF238						MIR124-3
																																					LEFTY1						MIR133A2
																																					SPHAR						MIR296
																																					CAPN9						MIR645
																																					KDM5B						MIR647
																																					SDCCAG8						HAR1A
																																					IL24						HAR1B
																																					DUSP10						UCKL1-AS1
																																					COG2						MIR298
																																					PLEKHA6						MIR941-1
																																					RBM34						MIR941-4
																																					KIF21B						MIR941-2
																																					NFASC						MIR941-3
																																					FBXO28						LOC100127888
																																					SRGAP2						DPH3P1
																																					ABCB10						LINC00029
																																					OPN3						LOC100144597
																																					PHLDA3						FLJ16779
																																					DSTYK						MIR1914
																																					RAB3GAP2						MIR1257
																																					LMOD1						MIR4325
																																					TRIM58						MIR3194
																																					INTS7						MIR4326
																																					AHCTF1						MIR3196
																																					NSL1						MTRNR2L3
																																					OR1C1						LOC100505815
																																					OR2M4						LOC100506384
																																					OR2L2						RTEL1-TNFRSF6B
																																					OR2L1P						SLMO2-ATP5E
																																					OPTC						STX16-NPEPL1
																																					RPS6KC1						MIR4756
																																					RNU5F-1						MIR4758
																																					DIEXF						MIR4532
																																					TAF5L						MIR4533
																																					DISC2						MIR5095
																																					DISC1						LOC100652730
																																					FLVCR1
																																					UBE2T
																																					CNIH4
																																					PYCR2
																																					NENF
																																					IL19
																																					G0S2
																																					IL20
																																					RRP15
																																					PPPDE1
																																					ADIPOR1
																																					SCCPDH
																																					TRIM17
																																					KCTD3
																																					DTL
																																					CYB5R1
																																					ARID4B
																																					EGLN1
																																					KIAA1383
																																					LAX1
																																					2020-03-02
																																					SUSD4
																																					KIF26B
																																					GPATCH2
																																					HEATR1
																																					KLHDC8A
																																					ETNK2
																																					TMEM206
																																					YOD1
																																					BATF3
																																					SLC30A10
																																					IARS2
																																					IPO9
																																					HHAT
																																					ENAH
																																					NUP133
																																					RCOR3
																																					C1orf106
																																					SERTAD4
																																					ERO1LB
																																					FMN2
																																					SMYD2
																																					ADCK3
																																					ZNF695
																																					GJC2
																																					CAMK1G
																																					SIPA1L2
																																					ZP4
																																					RHOU
																																					KLHL12
																																					LGR6
																																					TFB2M
																																					GREM2
																																					NUCKS1
																																					ACBD3
																																					SMYD3
																																					2020-03-01
																																					ARV1
																																					AIDA
																																					JMJD4
																																					C1orf116
																																					C1orf35
																																					TTC13
																																					PGBD5
																																					C1orf115
																																					HHIPL2
																																					VASH2
																																					ZNF669
																																					PCNXL2
																																					WDR26
																																					TRAF3IP3
																																					OR2G3
																																					OR2G2
																																					OR2C3
																																					TRIM11
																																					NUAK2
																																					RASSF5
																																					MIXL1
																																					C1orf124
																																					FCAMR
																																					OBSCN
																																					NTPCR
																																					EFCAB2
																																					KIAA1804
																																					LINC00260
																																					LINC00467
																																					ZNF496
																																					C1orf198
																																					PPP1R15B
																																					DISP1
																																					SLC45A3
																																					WNT3A
																																					NAV1
																																					ANGEL2
																																					IGFN1
																																					TMEM183A
																																					HIST3H2A
																																					LEMD1
																																					ZNF670
																																					NLRP3
																																					SLC26A9
																																					FAM36A
																																					SNAP47
																																					C1orf96
																																					LYPLAL1
																																					OR2M5
																																					OR2M3
																																					OR2T12
																																					OR14C36
																																					OR2T4
																																					DNAH14
																																					OR2B11
																																					ARL8A
																																					SYT2
																																					LOC127841
																																					GOLT1A
																																					WDR64
																																					C1orf131
																																					SPATA17
																																					EDARADD
																																					MRPL55
																																					HIST3H2BB
																																					TATDN3
																																					C1orf74
																																					BROX
																																					SLC35F3
																																					LOC148696
																																					LOC148709
																																					PTPRVP
																																					B3GALNT2
																																					MFSD4
																																					PM20D1
																																					C1orf150
																																					LOC148824
																																					CNIH3
																																					LOC149134
																																					SHISA4
																																					EXOC8
																																					RNF187
																																					C1orf227
																																					FAM71A
																																					C1orf55
																																					CNST
																																					C1orf65
																																					PLD5
																																					C1orf100
																																					IBA57
																																					TMEM9
																																					SLC41A1
																																					OR2T6
																																					LOC255654
																																					SYT14
																																					C1orf101
																																					OR2L13
																																					OR14A16
																																					LINC00303
																																					LOC284576
																																					LOC284578
																																					LOC284581
																																					HNRNPU-AS1
																																					LIN9
																																					VN1R5
																																					ZNF678
																																					PRSS38
																																					LOC339529
																																					LOC339535
																																					RD3
																																					OR6F1
																																					OR2W3
																																					OR2T8
																																					IRF2BP2
																																					MIA3
																																					C1orf95
																																					FAM89A
																																					RPS10P7
																																					TMEM81
																																					CAPN8
																																					C1orf31
																																					C1orf229
																																					OR2M1P
																																					OR11L1
																																					OR2L8
																																					OR2AK2
																																					OR2L3
																																					OR2M2
																																					OR2T33
																																					OR2M7
																																					C1orf140
																																					FAM177B
																																					LOC401980
																																					ZNF847P
																																					MIR194-1
																																					MIR205
																																					MIR215
																																					MIR29B2
																																					MIR29C
																																					C1orf186
																																					TRIM67
																																					MAP1LC3C
																																					H3F3AP4
																																					OR2W5
																																					OR13G1
																																					MIR135B
																																					DUSP5P
																																					C1orf133
																																					LOC641515
																																					MIR205HG
																																					FLVCR1-AS1
																																					LOC643723
																																					SNRPD2P2
																																					RPS7P5
																																					TMEM183B
																																					SNORA14B
																																					SNORA36B
																																					SNORA77
																																					SNORA16B
																																					LOC728463
																																					FAM72A
																																					LOC730227
																																					LOC731275
																																					LOC100130093
																																					LOC100130331
																																					LOC100287814
																																					LGALS8-AS1
																																					MIR1182
																																					MIR1537
																																					MIR1231
																																					MIR664
																																					LINC00184
																																					TSNAX-DISC1
																																					MIR320B2
																																					ZBED6
																																					MIR3123
																																					MIR4260
																																					MIR3122
																																					MIR3620
																																					MIR3916
																																					PROX1-AS1
																																					KDM5B-AS1
																																					LOC100506795
																																					LOC100506810
																																					ZNF670-ZNF695
																																					MIR4753
																																					MIR4666A
																																					MIR4677
																																					MIR4671
																																					MIR4427
																																					MIR4742
																																					LINC00538
[truncated: 3 more columns]

## Sheet: Recurrence_del_genes.conf_90
cytoband	10q11.21	17p11.2	11p15.5	4p11	19p13.3	15q11.1	14q11.2	16p11.2	2q21.2	14q32.33	7q22.1	11q12.1	19q11	2p25.1	1q21.1	19q13.2	1p36.13	22q11.21	11p11.2	20q11.21	7p22.3	19q13.42	21q11.2	9q13	2p11.1	2q37.3	4q35.2	4q12	6p11.2	7p11.2	16p13.3	7q11.21	3p24.3	10q11.21	9q13	9q13	18q21.2	6q21	22q13.33	8p23.3	12q24.33	7q36.1	5q13.2	20p11.1	7q22.1	1p36.33	10q24.1	9q34.3	12q12
q value	2.7239e-31	1.3082e-26	4.3091e-18	1.3426e-15	1.5086e-08	1.7849e-08	9.5574e-08	1.5943e-07	4.276e-07	6.7739e-07	1.3961e-07	4.3619e-06	4.9663e-05	5.2955e-05	5.8215e-05	0.00010927	2.1459e-07	0.00026616	4.3744e-05	4.5498e-06	0.00034086	0.00059625	0.00068115	1.8276e-08	0.00098265	0.0013944	0.001069	1.7854e-07	0.0018389	7.0405e-07	0.002921	7.7478e-07	0.0055594	4.9165e-07	3.4384e-07	2.1734e-05	0.015743	0.019934	0.021079	0.0043077	0.030249	0.013748	0.0082364	0.00014328	0.0001794	0.00013066	0.00042983	0.0574	0.0574
residual q value	3.9434e-29	1.3082e-26	4.3091e-18	1.593e-12	1.5086e-08	2.0457e-08	9.5574e-08	1.5943e-07	4.276e-07	6.7739e-07	4.1327e-06	2.3004e-05	4.9663e-05	5.2955e-05	7.495e-05	0.00011168	0.0001794	0.00025777	0.00028769	0.00031487	0.0003493	0.00057028	0.00067807	0.00072205	0.00099119	0.0013699	0.00187	0.00187	0.00187	0.0026748	0.002921	0.0030133	0.0053243	0.0060234	0.0073544	0.014506	0.016076	0.019619	0.020558	0.02162	0.031079	0.031406	0.036012	0.036012	0.05183	0.056115	0.056115	0.058987	0.058987
wide peak boundaries	chr10:38645301-42965635	chr17:21217728-21434288	chr11:985246-1085692	chr4:44720363-54876102	chr19:4800007-4897606	chr15:1-22319173	chr14:1-20228997	chr16:32894006-33961771	chr2:132558336-133472251	chr14:106744208-107349540	chr7:100479168-100680407	chr11:56043703-56467812	chr19:23996204-29282027	chr2:1-11330698	chr1:121116648-144014050	chr19:43094671-43603337	chr1:12550013-148775197	chr22:18513354-19164858	chr11:48346962-48514623	chr20:26189081-30193158	chr7:1577416-2275850	chr19:54694882-54779454	chr21:11098828-14780473	chr9:66500663-68427876	chr2:88879132-95697851	chr2:224813276-243199373	chr4:189065442-190947547	chr4:44996797-54974321	chr6:56475167-63949637	chr7:56217584-57196652	chr16:1252260-1306464	chr7:57485236-63563211	chr3:1-32157054	chr10:38978125-42975392	chr9:44877133-67020089	chr9:67320950-68728894	chr18:48257140-54818661	chr6:108276387-121402301	chr22:44194961-51304566	chr8:1-6271030	chr12:120913395-133851895	chr7:151664623-152382387	chr5:43549750-99897865	chr20:25994704-29611937	chr7:100458796-100613106	chr1:1-12294627	chr10:93619653-122523387	chr9:134404785-141213431	chr12:33021935-41090428
genes in wide peak	HSD17B7P2	KCNJ12	MUC6	CNGA1	PLIN3	hsa-mir-3118-6	OR11H2	TP53TG3	hsa-mir-663b	LINC00226	ACHE	OR8U1	ZNF254	hsa-mir-4261	hsa-mir-3118-3	PSG1	hsa-mir-3118-3	GGT3P	OR4A47	REM1	MAD1L1	RPS9	hsa-mir-3156-3	ANKRD20A1	RPIA	hsa-mir-3133	FRG1	CNGA1	hsa-mir-548u	hsa-mir-4283-1	TPSAB1	hsa-mir-4283-2	hsa-mir-466	ACTR3BP5	FAM75A7	ANKRD20A1	DCC	hsa-mir-3144	hsa-mir-3201	hsa-mir-596	hsa-mir-4304	XRCC2	hsa-mir-583	hsa-mir-663	ACHE	hsa-mir-1273d	hsa-mir-2110	hsa-mir-602	ABCD2
	SEPT7L	KCNJ18		GABRA2	TICAM1	hsa-mir-3118-4	POTEG	LOC390705	GPR39	LINC00221	MUC12	OR8H1	LOC148189	ACP1	hsa-mir-3118-2	PSG2	hsa-mir-3118-2	GSC2	OR4C45	HM13	PSMG3	LILRB5	ANKRD30BP2	LOC286297	LOC90499	hsa-mir-149	HSP90AA4P	GABRA2	DST	DKFZp434L192	TPSG1	ZNF716	hsa-mir-3135	LOC441666	KGFLP1	ANKRD20A3	SMAD4	hsa-mir-548b	hsa-let-7b	CLN8	ACADS	MLL3	hsa-mir-2277	NCOR1P1	TRIP6	hsa-mir-34a	hsa-mir-4295	hsa-mir-4292	KIF21A
	LOC399744			GABRA4		NBEAP1	OR11H12	TP53TG3C	LYPD1		UFSP1	OR8K3	ZNF726	HPCAL1	hsa-mir-3118-1	PSG3	hsa-mir-3118-1	PRODH		DEFB118	KIAA1908	LILRB3	MIR3156-3	AQP7P1	TEKT4	hsa-mir-4269	LOC401164	GABRA4	PRIM2	LOC650226	TPSB2	ZNF727	hsa-mir-563		FAM74A4	LOC642236	ME2	AMD1	hsa-mir-1249	MYOM2	BCL7A	GALNT11	hsa-mir-9-2	FAM182A	SRRT	hsa-mir-4252	hsa-mir-548e	hsa-mir-126	ALG10
	ACTR3BP5			GABRB1		HERC2P3	OR4Q3	TP53TG3B	ANKRD30BL			OR8J1	LOC100101266	ID2	LOC375010	PSG6	hsa-mir-942	DGCR6		MLLT10P1	TMEM184A	TSEN34		ANKRD20A3	ACTR3BP2	hsa-mir-562		GABRB1	BAG2	LOC100130849		LOC643955	hsa-mir-3134		LOC442421	FAM27B	RAB27B	COL10A1	ACR	DLGAP2	SCARB1	FABP5P3	hsa-mir-4280	LOC284801	UFSP1	hsa-mir-551a	hsa-mir-609	ABCA2	SLC2A13
	LOC441666			GABRG1		POTEB	POTEM		MIR663B			OR5R1		KCNF1	FLJ39739	PSG7	hsa-mir-320b-1	DGCR14		LINC00028	TFAMP1	LILRA6		FAM27B	LOC442028	hsa-mir-1471		GABRG1	ZNF451	MIR4283-2		LOC100287704	hsa-mir-4270		FAM27A		TCF4	FOXO3	ARSA	ARHGEF10	EIF2B1	LOC100128822	hsa-mir-582	MIR663A		hsa-mir-4251	hsa-mir-936	ABO	LRRK2
				SGCB		LOC348120	LOC642426					OR5M3		ODC1	PPIAL4G	PSG11	hsa-mir-4256	DGCR2		DEFB115	ELFN1			LOC100133920	GGT8P	hsa-mir-1244-1		SGCB	RAB23	MIR4283-1		LOC100287834	hsa-mir-885		LOC643648		MBD2	FRK	CHKB	KBTBD11	STX2		hsa-mir-449c			hsa-mir-429	hsa-mir-1307	C8G	ALG10B
				TEC		NF1P2						OR5M8		RPS7	EMBP1	PSG8	hsa-mir-197	USP18		DEFB116	MIR4655				ANKRD36BP2	AGXT		TEC	KIAA1586			MIR4283-2	ATP2B2		FAM74A2		TXNL1	FYN	CPT1B	FBXO25	GOLGA3		hsa-mir-581			hsa-mir-1302-2	hsa-mir-146b	CACNA1B	CPNE8
				TXK		CHEK2P2						OR5M11		RRM2	FAM72D	PSG10P	hsa-mir-553	TSSK2		DEFB119					LOC654342	ALPI		TXK	KHDRBS2			MIR4283-1	BTD		FAM75A5		POLI	GPR6	TYMP	CSMD1	GTF2H3		TRIM23			RERE	hsa-mir-3158-1	ENTPD2	C12orf40
				CORIN		LOC646214						OR5AR1		SOX11	LOC100130000	LOC100289650	hsa-mir-137	DGCR11		DEFB121					ANKRD20A8P	ALPP		CORIN	BEND6			LOC100506050	CAV3		FAM27C		WDR7	HDAC2	FBLN1	C8orf42	HPD		ARSB			CA6	hsa-mir-608	CEL	SYT10
				DCUN1D4		CXADRP2						OR5AP2		ADAM17	LOC100286793		hsa-mir-760	DGCR9		DEFB122					MIR4436A	ALPPL2		DCUN1D4	GUSBP4				DAZL				MEX3C	KPNA5	PPARA	ERICH1	MMP17		BHMT			TNFRSF8	hsa-mir-1287	CELP
				OCIAD1		GOLGA6L6						OR8K1		TPO			hsa-mir-186	DGCR5		DEFB123						KIF1A		CHIC2					FANCD2				ELAC1	LAMA4	MAPK11	ZNF596	P2RX4		BTF3			CDK11B	hsa-mir-607	COL5A1
				COMMD8		GOLGA8C						OR5M9		TSSC1			hsa-mir-1262	DGCR10		DEFB124						BOK		OCIAD1					FBLN2				CCDC68	MARCKS	MAPK12	LOC286083	P2RX7		CAST			CLCN6	hsa-mir-3157	DBH
				ATP10D								OR5M10		PXDN			hsa-mir-3117	TUBA8		FRG1B						CHRND		COMMD8					GRM7				MRO	MAN1A1	SBF1	OR4F21	POLE		CCNB1			CORT	ADD3	SARDH
				DANCR								OR5M1		KLF11			hsa-mir-101-1	PEX26		PSIMCT-1						CHRNG		ATP10D					HRH1				STARD6	PLN	UPK3A	RPL23AP53	PSMD9		CCNH			DFFA	ADRA2A	FCN1
				SLAIN2										ASAP2			hsa-mir-3116-2									COL4A3		DANCR					IL5RA				C18orf54	REV3L	WNT7B	MIR596	PXMP2		CDK7			DFFB	ADRB1	FCN2
				USP46										TAF1B			hsa-mir-761									COL4A4		SLAIN2					IRAK2				C18orf26	ROS1	CELSR1	LOC100287015	RAN		CETN3			DVL1	ARL3	FUT7
				RASL11B										ITGB1BP1			hsa-mir-30c-1									COL6A3		USP46					ITPR1				BOD1P	SMPD2	PPP6R2		CLIP1		CHD1			MEGF6	CASP7	RAPGEF1
				CWH43										RNF144A			hsa-mir-4255									DTYMK		RASL11B					OGG1				SNORA37	NR2E1	ZBED4		SFSWAP		CKMT2			ENO1	ENTPD1	GRIN1
				FIP1L1										PDIA6			hsa-mir-552									GBX2		CWH43					OXTR				LOC100287225	TSPYL1	SCO2		HNF1A		ERCC8			MTOR	CHUK	LCN1
				LNX1										YWHAQ			hsa-mir-4254									GPC1		FIP1L1					PPARG				LOC100505474	DDO	PKDREJ		UBC		COX7C			GABRD	ABCC2	NOTCH1
				OCIAD2										MYT1L			hsa-mir-1976									GPR35		LNX1					RAB5A				MIR4529	SNX3	NUP50		ZNF10		CRHBP			GNB1	COL17A1	PAEP
				SPATA18										SH3YL1			hsa-mir-3115									HDLBP		OCIAD2					RAF1					CD164	RABL2B		ZNF26		HAPLN1			ZBTB48	COX15	PTGDS
				NFXL1										GRHL1			hsa-mir-4253									AGFG1		SPATA18					RARB					WISP3	GRAMD4		ZNF84		VCAN			TNFRSF9	CPN1	RALGDS
				NIPAL1										TRAPPC12			hsa-mir-1256									HTR2B		NFXL1					RPL15					WASF1	MLC1		ZNF140		DHFR			MTHFR	CYP2C19	RPL7A
				LOC152578										CPSF3			hsa-mir-1290									SP110		NIPAL1					RPL32					ZBTB24	KIAA0930		CDK2AP1		F2R			NPPA	CYP2C8	RXRA
				SCFD2										SNTG2			ABCA4									INPP5D		LOC152578					SATB1					FIG4	MAPK8IP2		ULK1		F2RL1			NPPB	CYP2C9	SNAPC4
				COX7B2										ADI1			ACADM									IRS1		SCFD2					SEC13					TRAF3IP2	PLXNB2		DENR		F2RL2			PEX10	CYP2C18	SURF1
				SLC10A4										ALLC			ADORA3									KCNJ13		COX7B2					SETMAR					CDK19	BRD1		OASL		FGF10			PEX14	CYP17A1	SURF2
				FRYL										KIDINS220			AGL									NCL		GSX2					SLC6A1					TSPYL4	ARHGAP8		DYNLL1		FOXD1			PGD	CYP26A1	SURF4
				ZAR1										COLEC11			AK2									NDUFA10		SLC10A4					SLC6A6					BRD7P3	TBC1D22A		HCAR3		GLRX			PIK3CD	DNTT	MED22
				LRRC66										NOL10			AK4									2020-09-02		FRYL					SLC6A11					ASF1A	SAMM50		HIP1R		GTF2H2			PLOD1	DUSP5	SURF6
				RPL21P44										RSAD2			ALPL									NEU2		ZAR1					SYN2					SESN1	ATXN10		PIWIL1		GZMA			EXOSC10	EMX2	TRAF2
				SNORA26										CMPK2			ALX3									NPPC		LRRC66					TGFBR2					OSTM1	FAM19A5		CABP1		GZMK			PRKCZ	FGF8	TSC1
				ERVMER34-1										MBOAT2			AMPD1									PDCD1		RPL21P44					THRB					DSE	SULT4A1		NCOR2		HEXB			RPL22	GFRA1	TTF1
				MIR4449										TMEM18			AMPD2									PDE6D		SNORA26					TIMP4					TUBE1	RIBC2		KNTC1		HMGCR			SCNN1D	GOT1	VAV2
														C2orf50			AMY1A									SERPINE2		ERVMER34-1					TOP2B					CDC40	SMC1B		MLEC		HTR1A			SKI	PRLHR	BRD3
														PQLC3			AMY1B									PPP1R7		MIR4449					NR2C2					RWDD1	PARVB		RNF10		IL6ST			SLC2A5	GRK5	LHX3
														LOC150622			AMY1C									PSMD1							UBE2E1					GOPC	NCAPH2		MPHOSPH9		ISL1			SRM	HABP2	GFI1B
														CYS1			AMY2A									PTMA							UBE2E2					MICAL1	GTSE1		CAMKK2		ITGA1			TNFRSF1B	HELLS	SSNA1
														ATP6V1C2			AMY2B									SNORD20							VHL					FAM184A	MOV10L1		ZNF268		ITGA2			TP73	HHEX	EDF1
														RNASEH1			RHOC									SAG							WNT7A					ARMC2	FAM118A		TMED2		KIF2A			TNFRSF4	TLX1	CLIC3
														FAM150B			ATP1A1									CCL20							XPC					RPF2	TTC38		SNRNP35		TNPO1			MMP23B	HPS1	GTF3C5
														IAH1			ATP5F1									SP100							BRPF1					SLC22A16	C22orf26		FZD10		LNPEP			MMP23A	IDE	GTF3C4
														FLJ33534			ATP6V0B									SPP2							COLQ					KIAA1919	MIOX		MLXIP		CD180			KCNAB2	KIF11	MED27
														LOC339788			BAI2									CUL3							EOMES					GTF3C6	PRR5		P2RX2		MAP1B			TNFRSF25	ABLIM1	ADAMTSL2
														LINC00299			BCL9									DGKD							CAMK1					NUS1	TRMU		SETD1B		MEF2C			TNFRSF14	MXI1	PPP1R26
														LOC339822			BMP8B									PER2							BHLHE40					SLC16A10	PANX2		ANKLE2		MAP3K1			TNFRSF18	NDUFB8	SEC16A
														C2orf48			BRDT									LRRFIP1							KAT2B					CCDC162P	PARVG		ABCB9		MOCS2			PER3	NFKB2	TUBB4B
														LOC386597			C1QA									GPR55							SH3BP5					AKD1	CERK		RIMBP2		MSH3			VAMP3	NRAP	UBAC1
														LOC400940			C1QB									TRIP12							SLC4A7					NT5DC1	ALG12		ATP6V0A2		NAIP			H6PD	PAX2	OLFM1
														LINC00487			C1QC									ECEL1							VGLL4					FAM26D	CRELD2		HCAR1		NDUFS4			ISG15	PDE6C	AGPAT2
														FAM110C			C8A									EIF4E2							EDEM1					ZUFSP	ADM2		GALNT9		PCSK1			PLCH2	PGAM1	SDCCAG3
														LOC727982			C8B									HDAC4							TBC1D5					FAM162B	TRABD		ARL6IP4		PDE4D			CEP104	PITX3	NOXA1
														LOC730811			CAPZA1									FARP2							TATDN2					HS3ST5	PNPLA3		POP5		PIK3R1			KLHL21	PNLIP	WDR5
														SNORA80B			CAPZB									ARL4C							SRGAP3					GPRC6A	SELO		ANAPC5		PMCHL2			SLC35E2	PNLIPRP1	C9orf9
														MIR4261			CASP9									RAMP1							IQSEC1					RFX6	HDAC10		RHOF		RAD17			MFN2	PNLIPRP2	ADAMTS13
														LOC100505964			CASQ2									NMUR1							NR1D2					SLC35F1	LDOC1L		SBNO1		RASA1			ANGPTL7	PSD	C9orf7
														LOC100506054			RUNX3									STK25							ARPC4					VGLL2	KIAA1644		ZCCHC8		RASGRF2			UBE4B	ALDH18A1	SLC2A6
														LOC100506274			CD2									COPS8							TADA3					LACE1	SHANK3		CHFR		RPS23			MAD2L2	RBP4	MAN1B1
																	CD53									CAPN10							ATG7					FAM26E	TUBGCP6		DIABLO		SMN1			MASP2	RGS10	SETX
																	CD58									SP140							CHL1					MCM9	LOC90834		PITPNM2		SMN2			UTS2	SCD	PMPCA
																	CDA									PASK							CAND2					CEP57L1	LMF2		EP400		TAF9			RER1	SFRP5	COBRA1
																	CDC20									ATG4B							RFTN1					PPIL6	PHF21B		DHX37		TBCA			PARK7	FBXW4	NELF
																	CDC42									SH3BP4							NUP210					LOC285758	KLHDC7B		FBRSL1		NR2F1			ACOT7	SLC18A2	GPSM1
																	CDKN2C									NGEF							PLCL2					FLJ34503	PNPLA5		DDX55		THBS4			CLSTN1	SLIT1	DKFZP434A062
																	CD52									SNORD82							ANKRD28					DCBLD1	LOC150381		C12orf43		XRCC4			KIF1B	TAF5	GBGT1
																	RCC1									SNED1							CAPN7					LOC285762	C22orf40		VPS33A		SERF1A			CAMTA1	TCF7L2	SNORD36C
																	CHI3L2									GIGYF2							MKRN2					RSPH4A	CN5H6.4		RSRC2		ENC1			TARDBP	TECTB	SNORD36B
																	CLCA1									TRAF3IP1							THUMPD3					LINC00222	LOC284933		AACS		AP3B1			ICMT	TIAL1	SNORD36A
																	CLCNKA									ANO7							HACL1					CEP85L	RPL23AP82		NOC4L		PPAP2A			CHD5	TLL2	SNORD24
																	CLCNKB									PRLH							TTLL3					FAM26F	LOC339685		B3GNT4		PDE8B			NOC2L	WNT8B	NDOR1
																	PLK3									THAP4							CNTN6					GSTM2P1	C22orf34		OGFOD2		HSPB3			FBXO2	XPNPEP1	PHPT1
																	CNN3									ANKMY1							LSM3					RFPL4B	CHKB-CPT1B		VPS37B		HOMER1			FBXO6	SHOC2	ANAPC2
																	CNR2									SCLY							RBMS3					C6orf225	LINC00207		TCTN2		SCAMP1			OR4F3	EIF3A	DPP7
																	COL8A2									ASB1							NKIRAS1					TRAF3IP2-AS1	MIRLET7BHG		RNF34		CARTPT			ARHGEF16	GBF1	OBP2B
																	COL9A2									CAB39							LINC00312					MIR548B	FLJ46257		CCDC92		TTC37			SSU72	LDB1	OBP2A
																	COL11A1									UGT1A10							LMCD1					TPI1P3	IL17REL		PUS1		ZFYVE16			UBIAD1	BTRC	MRPS2
																	COL16A1									UGT1A8							C3orf32					C6orf186	MIRLET7A3		COQ5		EDIL3			WRAP73	PKD2L1	EGFL7
																	CPT2									UGT1A7							TRNT1					BET3L	MIRLET7B		CCDC62		COL4A3BP			SLC45A1	BTAF1	FBXW5
																	CRYZ									UGT1A6							CRBN					LOC100287632	LINC00229		KDM2B		LHFPL2			SDF4	INA	C9orf167
																	CSF1									UGT1A5							C3orf19						FAM116B		UNC119B		CWC27			ERRFI1	PDLIM1	EXD3
																	CSF3R									UGT1A9							GHRL						PIM3		ORAI1		CCNO			MXRA8	SMC3	C9orf86
																	CTBS									UGT1A4							OXSM						ODF3B		C12orf65		NSA2			HES2	NEURL	INPP5E
																	CTH									UGT1A1							ARL8B						PRR5-ARHGAP8		TMEM132C		FST			CASZ1	LGI1	NPDC1
																	CTPS									UGT1A3							SETD5						SYCE3		TMEM132B		POLR3G			CPSF3L	NOLC1	BARHL1
																	CYP2J2									PID1							TMEM40						LOC730668		LOC116437		PLK2			C1orf159	GSTO1	REXO4
																	CYP4A11									ATG16L1							NGLY1						LOC100128946		TMEM132D		IQGAP2			AURKAIP1	BAG3	KCNT1
																	CYP4B1									USP40							TMEM111						LOC100144603		SLC15A4		MRPS30			MRPL20	SH3PXD2A	CARD9
																	DAB1									HJURP							BRK1						LOC100271722		SPPL3		SMA4			ATAD3A	SLK	DDX31
																	DBT									HES6							RAD18						MIR1249		BRI3BP		SMA5			PANK4	ZNF518A	MRPL41
																	GADD45A									DOCK10							LRRN1						MIR3201		FAM101A		ESM1			DNAJC11	DCLRE1A	EHMT1
																	DDOST									C2orf83							CIDEC						MIR3619		ZNF664		ADAMTS6			AJAP1	FRAT1	NTNG2
																	DHCR24									MFF							ZFYVE20						LOC100506714		TMEM120B		RHOBTB3			CTNNBIP1	ACTR1A	KIAA1984
																	DIO1									CXCR7							AZI2						MIR4763		WDR66		ELL2			AGTRAP	SMNDC1	SNHG7
																	DPH2									RNPEPL1							MTMR14						MIR4762		GLT1D1		SV2C			TP73-AS1	NPM3	TMEM141
																	DPYD									NYAP2							MRPS25						MIR4535		PGAM5		MRPS27			PLEKHG5	SORBS1	C9orf37
																	DR1									GAL3ST2							CRELD1								RILPL2		PPWD1			LRRC47	ERLIN1	SAPCD2
																	E2F2									RAB17							TMEM43								DNAH10		OTP			PTCHD2	LBX1	C9orf69
																	ECE1									COPS7B							ZNF385D								LRRC43		SKIV2L2			HES4	MGEA5	UAP1L1
																	S1PR1									MRPL44							HDAC11								GPR133		NNT			MIIP	PRDX3	ARRDC1
																	EDN2									TRPM8							TSEN2								MORN3		SSBP2			PRDM16	VAX1	WDR85
																	PHC2									MLPH							GRIP2								HNF1A-AS1		BHMT2			NMNAT1	SEC23IP	TMEM203
																	CELSR2									IQCA1							C3orf20								DDX51		PART1			VWA1	RAB11FIP2	ZMYND19
																	EPHA2									FAM124B							JAGN1								HCAR2		FAM169A			NADK	CPEB3	NACC2
																	ELAVL4									TM4SF20							GHRLOS2								LOC338799		RNU5E-1			MMEL1	INPP5F	C9orf116
																	EPB41									C2orf54							IL17RC								EP400NL		RNU5D-1			OR4F5	NT5C2	LCN8
																	EPHA8									ARMC9							EAF1								RILPL1		DIMT1			NOL9	PDCD11	FAM69B
																	EPHB2									EFHD1							OXNAD1								IL31		DMGDH			LINC00115	SORCS3	SLC34A3
																	EPS15									SPHKAP							OSBPL10								SETD8		IPO11			MORN1	PPRC1	CAMSAP1
																	EXTL1									SLC19A3							C3orf24								LOC387895		GCNT4			GPR157	RRP12	C9orf163
																	EXTL2									ILKAP							LRRC3B								LOC400084		POLK			SPSB1	TBC1D12	MAMDC4
																	EYA3									ITM2C							GALNTL2								FLJ37505		ERAP1			GLTPD1	DNMBP	LCN6
																	F3									RHBDD1							KCNH8								LOC440117		PELO			TAS1R1	FRAT2	AK8
																	FAAH									ING5							CHCHD4								FLJ31485		DHX29			OR4F16	DPCD	C9orf96
																	FABP3									MGC16025							METTL6								LOC647589		DDX4			CCNL2	SEC31B	QSOX2
																	FCGR1B									DNER							TAMM41								SNORA49		SGTB			ESPN	ATRNL1	LINC00094
																	FGR									B3GNT7							IL17RE								LOC100128554		ARL15			TAS1R3	TCTN3	LCN12
																	FHL3									SP140L							SGOL1								LOC100130238		AGGF1			ATAD3B	C10orf12	C9orf142
																	FOXE3									AGAP1							PP2D1								LOC100190940		WDR41			PLEKHN1	ANKRD2	TPRN
																	FOXD2									TWIST2							EFHB								ZNF605		RIOK2			SLC25A33	CNNM1	GLT6D1
																	FMO5									DIS3L2							CPNE9								MIR4304		DEPDC1B			LZIC	MYOF	PNPLA7
																	FUCA1									NEU4							LOC152024								MIR3612		BDP1			C1orf170	PDCD4	C9orf169
																	IFI6									SPATA3							ZCWPW2								MIR3908		ERBB2IP			KIAA1751	C10orf28	ENTPD8
																	GALE									FBXO36							CMC1								LOC100506668		NLN			KIAA2013	POLL	C9orf171
																	GBP1									MTERFD2							NEK10								LOC100507055		ARRDC3			THAP3	BLNK	LCN15
																	GBP2									UBE2F							FGD5								LOC100507066		ZSWIM6			FBXO44	KCNIP2	C9orf172
																	GBP3									OTOS							CIDECP								LOC100507091		ANKRA2			LOC115110	EXOSC1	LRRC26
																	GFI1									MYEOV2							CNTN4								LOC100507206		MCCC2			RBP7	CALHM2	TMEM8C
																	GJA4									OR6B3							STT3B								ZNF664-FAM101A		CENPK			ACAP3	CUTC	LCN9
																	GJA5									LOC150935							LOC285326								MIR4700		ERAP2			UBE2J2	PLCE1	LOC401557
																	GJA8									LOC151171							SUMF1										RGNEF			PUSL1	SUFU	LCNL1
																	GJB3									LOC151174							RPUSD3										SLC30A5			B3GALT6	ACSL5	C9orf139
																	GJB5									SLC16A14							PRRT3										CENPH			TPRG1L	EXOC6	FAM166A
																	GCLM									LOC151475							LOC285370										GPBP1			FAM213B	CCNJ	SOHLH1
																	GNAI3									LINC00471							LOC285375										PARP8			ACTRT2	2020-03-05	MIR126
																	GNAT2									LOC151484							DPH3										ANKRD55			MIB2	CNNM2	LCN10
																	GNG5									MSL3P1							LOC339862										MCTP1			C1orf127	C10orf26	C9orf173
																	SFN									WDR69							GADL1										PTCD2			SAMD11	C10orf118	NRARP
																	GPR3									C2orf57							ZNF860										ELOVL7			LOC148413	CRTAC1	FAM163B
																	GPX7									TIGD1							COL6A4P1										C5orf44			PHF13	CEP55	FLJ40292
																	GRIK3									LOC200772							TPRXL										ATG10			CCDC27	CWF19L1	TUBBP5
																	GSTM1									C2orf72							LHFPL4										SPATA9			SLC2A7	PI4K2A	RNF224
																	GSTM2									CXXC11							VENTXP7										FAM172A			CALML6	HIF1AN	SNORA17
																	GSTM3									DUSP28							LOC401052										GPR98			TMEM201	FAM178A	SNORA43
																	GSTM4									ESPNL							LOC440944										UTP15			C1orf86	FAM45B	MIR602
																	GSTM5									ECEL1P2							SNORA7A										ZCCHC9			ATAD3C	TDRD1	RNF208
																	GTF2B									LOC348761							LOC644990										ANKRD32			LOC254099	C10orf2	DNLZ
																	GUCA2A									RBM44							LOC645206										ZBED3			TTLL10	TM9SF3	LOC100128593
																	GUCA2B									AQP12A							MIR563										GFM2			NPHP4	ENTPD7	LOC100129722
																	HCRTR1									KLHL30							MIR885										SPZ1			FAM41C	AS3MT	LOC100130954
																	HDAC1									C2orf82							EGOT										NDUFAF2			LOC284661	GPAM	LOC100131193
																	HMGN2									OR6B2							GHRLOS										MRPS36			C1orf174	KIAA1598	FAM157B
																	HMGCL									ASB18							LOC100129480										ATP6AP1L			KLHL17	FAM160B1	RNU6ATAC
																	HMGCS2									FLJ43879							LOC100132526										SNX18			TMEM240	SEMA4G	LOC100289341
																	HPCA									MIR149							LOC100288428										FCHO2			TMEM52	AVPI1	MIR4292
																	HSD3B1									DNAJB3							MIR4270										RAB3C			C1orf187	HPSE2	MIR3621
																	HSD3B2									LOC643387							MIR3714										LYSMD3			AGRN	FAM204A	MIR3689A
																	IGSF3									PRR21							FGD5-AS1										C5orf35			APITD1	MMS19	MIR3689B
																	HSPG2									LOC646736							LOC100505696										IL31RA			GPR153	NOC3L	LOC100506599
																	HTR1D									PRSS56							LOC100507582										EMB			FAM132A	ZDHHC6	MIR3689D1
																	HTR6									AQP12B							ARPC4-TTLL3										JMY			HES5	CUEDC2	MIR3689F
																	ID3									SNORA75							MIR4791										POU5F2			LOC388588	FBXL15	MIR4669
																	CYR61									SCARNA6							MIR4790										TMEM171			RNF207	C10orf76	MIR4673
																	IL12RB2									SCARNA5							MIR548AC										TMEM174			HES3	HPS6	MIR4674
																	INPP5B									D2HGDH							MIR4792										POC5			RNF223	TMEM180	MIR3689C
																	IPP									LOC728323							MIR4442										ACOT12			MIR200A	MCMBP	MIR3689D2
																	JAK1									PP14571																	SREK1			MIR200B	C10orf95	MIR3689E
																	JUN									LOC100286922																	SLC38A9			MIR34A	C10orf81	MIR4479
																	KCNA2									MIR1471																	TMEM167A			FLJ42875	PDZD7
																	KCNA3									MIR1244-1																	MBLAC2			ANKRD65	OBFC1
																	KCNA10									BOK-AS1																	TMEM161B			MIR429	UBTD1
																	KCNC4									MIR1244-3																	MARVELD2			FAM138F	WDR96
																	KCND3									MIR1244-2																	ARSK			LOC643837	TRIM8
																	STMN1									MIR4269																	FAM81B			TMEM88B	KAZALD1
																	LCK									UBE2F-SCLY																	MIER3			C1orf233	SFXN3
																	LEPR									MIR4439																	CDC20B			C1orf200	SLC25A28
																	TACSTD2									MIR4777																	PAPD4			FAM138A	ELOVL3
																	MAGOH									MIR2467																	LIX1			WASH7P	MARVELD1
																	MATN1									MIR4440																	ZNF366			MIR551A	PCGF6
																	MFAP2									MIR4786																	FAM151B			CDK11A	LOXL4
																	MOV10									MIR4441																	S100Z			SLC35E2B	ZDHHC16
																	MPL																										CCDC125			LOC728716	LZTS2
																	MSH4																										C5orf27			LOC729737	LCOR
																	MTF1																										GAPT			OR4F29	MRPL43
																	MUTYH																										CMYA5			LOC100129534	AFAP1L2
																	MYCL1																										ANKRD31			LOC100130417	PYROXD2
																	NASP																										SERINC5			LOC100132062	USMG5
																	NBL1																										LOC257396			LOC100132287	ARHGAP19
																	NDUFS5																										KIAA0825			LOC100133331	ITPRIP
																	NFIA																										GPR150			LOC100133445	LINC00263
																	NFYC																										NBPF22P			LOC100133612	BBIP1
																	NGF																										C5orf64			DDX11L1	OPALIN
																	NHLH2																										RNF180			TTC34	HOGA1
																	NOTCH2																										SREK1IP1			LOC100288069	SORCS1
																	NRAS																										RGMB			NPPA-AS1	PIK3AP1
																	NRD1																										RFESD			MIR4251	MORN4
																	YBX1																										ANKRD34B			MIR4252	ZFYVE27
																	ROR1																										IDAS			ENO1-AS1	FRA10AC1
																	OPRD1																										ACTBL2			APITD1-CORT	SFXN2
																	ORC1																										MTX3			MIR4689	PDZD8
																	OVGP1																										HCN1			MIR4632	C10orf32
																	PAFAH2																										MAST4			MIR4417	GSTO2
																	PRDX1																										RNF138P1				SFR1
																	PAX7																										RGS7BP				CALHM3
																	PDE4B																										MIR9-2				PNLIPRP3
																	PDZK1																										CRSP8P				SFXN4
																	PGM1																										FLJ42709				C10orf129
																	PIN1P1																										GPX8				TRUB1
																	PLA2G2A																										FLJ35946				VTI1A
																	PLA2G5																										MIR449A				LOC143188
																	POU3F1																										LOC642366				FGFBP3
																	PPP1R8																										C5orf43				C10orf82
																	PPT1																										LOC644936				C10orf46
																	PRKAA2																										LINC00461				NKX2-3
																	PRKAB2																										LOC647859				SLC35G1
																	PRKACB																										GUSBP3				CCDC147
																	PKN2																										GTF2H2B				EMX2OS
																	PSMA5																										SCARNA18				PPAPDC1A
																	PSMB2																										SNORA47				CALHM1
																	PTAFR																										MIR449B				CASC2
																	PTGER3																										MIR581				HSPA12A
																	PTGFR																										MIR583				PIPSL
																	PTGFRN																										GTF2H2C				BLOC1S2
																	PTPRF																										SERF1B				RBM20
																	ABCD3																										LOC728723				LOC282997
																	RAB3B																										GTF2H2D				O3FAR1
																	RABGGTB																										GUSBP9				KCNK18
																	RAP1A																										LOC100129716				CYP26C1
																	RAP1GAP																										LRRC70				VWA2
																	RBBP4																										LOC100131067				NANOS1
																	RHCE																										FAM159B				NHLRC2
																	RHD																										LOC100133050				C10orf96
																	RLF																										LOC100170939				CC2D2B
																	SNORD21																										LOC100272216				ENO4
																	RPA2																										LOC100289230				GUCY2GP
																	RPE65																										NCRUPAR				FLJ41350
																	RPL5																										LOC100303749				GOLGA7B
																	RPL11																										MIR2277				FAM45A
																	RPS6KA1																										MIR449C				C10orf62
																	RPS8																										MIR4280				MIR146B
																	RSC1A1																										MTRNR2L2				SNORA19
																	SORT1																										MIR3607				RPL13AP6
																	SARS																										MIR3660				SNORA12
																	SCP2																										LOC100505894				MIR608
																	SDHB																										OCLN				MIR609
																	SFPQ																										MIR4804				LOC728558
																	SRSF4																										MIR3977				LOC729020
																	ST3GAL3																										MIR4803				TLX1NB
																	STIL																														MIR936
																	SLC1A7																														C10orf131
																	SLC2A1																														LOC100128054
																	SLC6A9																														DNMBP-AS1
																	SLC9A1																														LOC100289509
																	SLC16A1																														MIR1287
																	STXBP3																														MIR1307
																	SYCP1																														MIR2110
																	TAF12																														MIR3157
																	TAF13																														MIR3158-1
																	TAL1																														MIR4295
																	TBX15																														MIR3158-2
																	TCEA3																														MIR3663
																	TCEB3																														LOC100505540
																	TGFBR3																														LOC100505761
																	TIE1																														LOC100505839
																	TSHB																														LOC100505933
																	TTC4																														MARK2P9
																	UQCRH																														C10orf32-AS3MT
																	UROD																														ARHGAP19-SLIT1
																	USP1																														MIR4680
																	VCAM1																														MIR4483
																	WNT2B																														MIR4682
																	ZSCAN20																														MIR4482-1
																	ZBTB17																														MIR4681
																	SLC30A2																														MIR4685
																	LUZP1
																	PRDM2
																	DNALI1
																	LRP8
																	LAPTM5
																	BSND
																	CSDE1
																	EVI5
																	PTP4A2
																	ARID1A
																	CDC7
																	BCAR3
																	SNHG3
																	NR0B2
																	RAD54L
																	TTF2
																	PIK3R3
																	ITGA10
																	LMO4
																	FCN3
																	CDC14A
																	YARS
																	MKNK1
																	AKR7A2
																	PPAP2B
																	RTCD1
																	PTCH2
																	ALDH4A1
																	EIF3I
																	EIF4G3
																	B4GALT2
																	PABPC4
																	FPGT
																	PEX11B
																	FUBP1
																	EIF2B3
																	BCL10
																	ARTN
																	MAP3K6
																	DIRAS3
																	SLC16A4
																	KCNQ4
																	ZMYM4
																	ZMYM6
																	DHRS3
																	SRSF11
																	ZFYVE9
																	CD101
																	2020-09-15
																	ZRANB2
																	SNRNP40
																	ARHGAP29
																	C1orf38
																	TMEM59
																	SEC22B
																	CHD1L
																	CLCA3P
																	CLCA2
																	HS2ST1
																	PDE4DIP
																	IPO13
																	SDC3
																	KDM4A
																	CROCC
																	PUM1
																	RIMS3
																	KIAA0494
																	DNAJC6
																	LRIG2
																	LPPR4
																	ZBTB40
																	RBM8A
																	THRAP3
																	INSL5
																	PIGK
																	PTPRU
																	TSPAN2
																	TSPAN1
																	CELA3A
																	PDZK1IP1
																	WASF2
																	INADL
																	HNRNPR
																	SRRM1
																	CNKSR1
																	ZMPSTE24
																	BCAS2
																	AKR1A1
																	WARS2
																	CEPT1
																	PIAS3
																	TESK2
																	PPIE
																	VAV3
																	PPIH
																	CAP1
																	LRRC41
																	HBXIP
																	IFI44
																	POLR3C
																	TXNIP
																	PDPN
																	KHDRBS1
																	GMEB1
																	AP4B1
																	NUDC
																	PHTF1
																	AHCYL1
																	SRSF10
																	WDR3
																	MAN1A2
																	SF3A3
																	IFI44L
																	EBNA1BP2
																	KIF2C
																	DNAJB4
																	ADAM30
																	RCAN3
																	FAF1
																	CD160
																	GLMN
																	HHLA3
																	MST1P2
																	DDX20
																	MST1P9
																	PADI2
																	LYPLA2
																	CTRC
																	CLCA4
																	MTF2
																	DNAJC8
																	NTNG1
																	FOXJ3
																	WDR47
																	SCMH1
																	AKR7A3
																	TTC39A
																	SPEN
																	KDM1A
																	USP33
																	WDTC1
																	KIAA0090
																	MAST2
																	NCDN
																	CLCC1
																	SLC35D1
																	PLEKHM2
																	OTUD3
																	KAZN
																	LPHN2
																	KIAA1107
																	ZCCHC11
																	SZT2
																	DNAJC16
																	UBR4
																	USP24
																	ATP13A2
																	ITGB3BP
																	CELA3B
																	SLC35A3
																	MACF1
																	LRRC8B
																	LPAR3
																	PADI4
																	DDAH1
																	TMEM50A
																	KPNA6
																	SSBP3
																	STX12
																	NBPF14
																	CLIC4
																	SYF2
																	RWDD3
																	PARS2
																	MMACHC
																	ZZZ3
																	ACOT11
																	C1orf144
																	LDLRAP1
																	SERBP1
																	PTPN22
																	PHGDH
																	PLA2G2D
																	AK5
																	MYCBP
																	HEYL
																	EIF2C1
																	SNORA66
																	SNORD45B
																	SNORD45A
																	SNORD55
																	RNU11
																	RNF11
																	FOXD3
																	TRAPPC3
																	HSPB7
																	CHIA
																	AHDC1
																	RNF115
																	TEKT2
																	SMPDL3B
																	ANGPTL3
																	PRO0611
																	LINC00339
																	GNL2
																	GPSM2
																	ALG6
																	PADI1
																	SLC25A24
																	PLA2G2E
																	DNTTIP2
																	HP1BP3
																	TMED5
																	CELA2B
																	ZNF593
																	ZNF691
																	TXNDC12
																	TNNI3K
																	SH3GLB1
																	MECR
																	UTP11L
																	MRTO4
																	HAO2
																	ACP6
																	TMEM69
																	MRPL37
																	HOOK1
																	SNX7
																	HPCAL4
																	YTHDF2
																	GPR89B
																	ZCCHC17
																	TRIM33
																	DPH5
																	HSPB11
																	PADI3
																	CMPK1
																	GPR88
																	WNT4
																	YIPF1
																	FBXO42
																	CCDC76
																	RNF186
																	SPATA6
																	L1TD1
																	RSBN1
																	ZNHIT6
																	GPN2
																	LEPROT
																	FBLIM1
																	MED18
																	TRIT1
																	GIPC2
																	GDAP2
																	FAM46C
																	PALMD
																	FNBP1L
																	ST7L
																	PQLC2
																	RHBDL2
																	ADPRHL2
																	TRNAU1AP
																	C1orf109
																	C1orf123
																	TTC22
																	AIM1L
																	TMEM51
																	BSDC1
																	XKR8
																	TMEM39B
																	PRPF38B
																	CDCA8
																	LRRC8D
																	ARHGEF10L
																	PRMT6
																	RNF220
																	FAM176B
																	TMEM57
																	TRIM62
																	RAVER2
																	ECHDC2
																	FGGY
																	MCOLN3
																	SLC22A15
																	CAMK2N1
																	RNPC3
																	ASAP3
																	POMGNT1
																	PNRC2
																	LRRC40
																	DEPDC1
																	PIGV
																	NBPF1
																	MAP7D1
																	TMEM48
																	NECAP2
																	IQCC
																	LRIF1
																	CTTNBP2NL
																	RCC2
																	FAM212B
																	DMAP1
																	GNG12
																	TMEM234
																	FAM54B
																	CCBL2
																	TMEM167B
																	OLFML3
																	C1orf63
																	PITHD1
																	MAN1C1
																	NIPAL3
																	SEPN1
																	AMIGO1
																	ODF2L
																	KIAA1324
																	LRRC7
																	KIF17
																	ZSWIM5
																	KIAA1522
																	CACHD1
																	MIER1
																	GRHL3
																	PTBP2
																	DNASE2B
																	DLGAP3
																	IL22RA1
																	HIVEP3
																	GPBP1L1
																	CELA2A
																	GPATCH3
																	DMRTB1
																	DMRTA2
																	CLSPN
																	OXCT2
																	RRAGC
																	ELTD1
																	TINAGL1
																	LEPRE1
																	PLA2G2F
																	HIAT1
																	SMAP2
																	ATPAF1
																	S100PBP
																	MEAF6
																	RBM15
																	DEM1
																	CEP85
																	ELOVL1
																	DCLRE1B
																	MRPS15
																	PINK1
																	MARCKSL1
																	PRAMEF1
																	PRAMEF2
																	ZNF643
																	SELRC1
																	PHACTR4
																	C1orf135
																	ERI3
																	C1orf50
																	WDR77
																	CCDC28B
																	EFHD2
																	RSG1
																	DLEU2L
																	NKAIN1
																	EPS8L3
																	MUL1
																	TMEM53
																	AKIRIN1
																	HECTD3
																	BEND5
																	VTCN1
																	YRDC
																	ZYG11B
																	PPCS
																	LIN28A
																	SH3D21
																	TTLL7
																	SNIP1
																	AGMAT
																	WDR78
																	ZMYM1
																	RPAP2
																	FAM110D
																	KIAA0319L
																	DHDDS
																	DENND2D
																	WLS
																	RPF1
																	SIKE1
																	ZC3H12A
																	TRIM45
																	ZNF436
																	TAS1R2
																	GJA9
																	SYNC
																	ACTL8
																	ANKRD13C
																	TSSK3
																	VANGL1
																	ST6GALNAC5
																	HYI
																	SH3BGRL3
																	SESN2
																	GPR61
																	STK40
																	TM2D1
																	REG4
																	TMEM222
																	SYDE2
																	ZNF644
																	USP48
																	ZMYND12
																	NBPF3
																	LRRC8C
																	ZDHHC18
																	SGIP1
																	POLR3GL
																	DDI2
																	PROK1
																	EFCAB7
																	NT5C1A
																	TRIM63
																	PSRC1
																	FAM167B
																	MGC12982
																	CROCCP2
																	HPDL
																	ATP1A1OS
																	AGBL4
																	MFSD2A
																	ATG4C
																	PRPF38A
																	SYTL1
																	IGSF21
																	LSM10
																	C1orf94
																	SNHG12
																	FAM40A
																	DOCK7
																	C1orf201
																	SPOCD1
																	ZNF697
																	BTF3L4
																	UBXN11
																	NEXN
																	C1orf158
																	ATPIF1
																	SNORD46
																	SNORD38A
																	SNORD38B
																	DNAJA1P5
																	MED8
																	KTI12
																	C1orf212
																	ADC
																	TMEM54
																	HENMT1
																	TOE1
																	ERMAP
																	CSMD2
																	MYSM1
																	GNRHR2
																	CROCCP3
																	FHAD1
																	OSBPL9
																	OMA1
																	RAB42
																	LRRC42
																	GBP4
																	GBP5
																	FAM46B
																	SSX2IP
																	OLFM3
																	CCDC163P
																	C1orf172
																	LRRC38
																	AADACL3
																	WDR63
																	MAB21L3
																	IFFO2
																	SLC44A3
																	ATXN7L2
																	C1orf194
																	ASB17
																	TYW3
																	C1orf173
																	LRRIQ3
																	MYOM3
																	DMBX1
																	TMCO2
																	ZNF684
																	TCEANC2
																	PODN
																	LRRC39
																	GJB4
																	HMGB4
																	RNF19B
																	C1orf122
																	OSCP1
																	C1orf216
																	KLHDC7A
																	VWA5B1
																	UBXN10
																	C1orf87
																	LIX1L
																	HSD3BP4
																	KLF17
																	TMEM125
																	ARHGEF19
																	DRAM2
																	C1orf88
																	C1orf162
																	SYT6
																	SAMD13
																	C1orf52
																	TMEM56
																	NBPF4
																	UBE2U
																	HFE2
																	ANKRD35
																	SLC30A7
																	C1orf213
																	KNCN
																	MOB3C
																	GLIS1
																	MGC27382
																	DCDC2B
																	ZNF362
																	LOC149086
																	MANEAL
																	IL23R
																	PDIK1L
																	CLDN19
																	WDR65
																	C1orf210
																	CCDC24
																	BTBD19
																	CCDC17
																	C1orf64
																	RP11-165H20.1
																	DENND2C
																	GBP6
																	LPPR5
																	FNDC7
																	IL28RA
																	CYP4Z2P
																	CITED4
																	FLJ40434
																	C1orf177
																	KANK4
																	SASS6
																	FAM43B
																	PPIAL4A
																	HFM1
																	PAQR7
																	UBL4B
																	PDIA3P
																	EIF2C3
																	EIF2C4
																	ALG14
																	FAM76A
																	LINC00466
																	C1orf168
																	TMEM61
																	CYP4Z1
																	CDCP2
																	SLC5A9
																	CC2D1B
																	NBPF11
																	NUDT17
																	TXLNA
																	TCTEX1D1
																	SPAG17
																	SLFNL1
																	C1orf126
																	HIPK1
																	SLC44A5
																	AKR7L
																	AKR7A2P1
																	FNDC5
																	EPHX4
																	AKNAD1
																	TMCO4
																	MCOLN2
																	COL24A1
																	PCSK9
																	ST6GALNAC3
																	ZNF683
																	NEGR1
																	MDS2
																	CYP4X1
																	MAGI3
																	BEST4
																	FAM19A3
																	CYP4A22
																	C1orf185
																	LOC284551
																	NBPF15
																	FAM102B
																	SYPL2
																	CYB561D1
																	ANKRD34A
																	LOC284632
																	RSPO1
																	EPHA10
																	ZNF326
																	BTBD8
																	RIMKLA
																	SLC25A34
																	ESPNP
																	PPM1J
																	HIST2H2BA
																	FAM151A
																	LOC339442
																	MTMR9LP
																	ZBTB8OS
																	TFAP2E
																	LOC339505
																	LOC339524
																	C1orf228
																	ZNF642
																	AADACL4
																	PRAMEF5
																	HNRNPCL1
																	PRAMEF9
																	PRAMEF10
																	CCDC18
																	MYBPHL
																	BARHL2
																	HSP90B3P
																	NBPF7
																	TCTEX1D4
																	SERINC2
																	FAM159A
																	FAM131C
																	PADI6
																	BMP8A
																	SPATA21
																	CCDC23
																	ATPAF1-AS1
																	HEATR8
																	FAM73A
																	LOC375010
																	CATSPER4
																	NSUN4
																	TMEM82
																	TRNP1
																	CD164L2
																	LOC388630
																	LDLRAD1
																	GBP7
																	C1orf146
																	FAM69A
																	SLC6A17
																	NOTCH2NL
																	FLJ39739
																	PRAMEF12
																	PRAMEF21
																	PRAMEF8
																	PRAMEF18
																	PRAMEF17
																	PLA2G2C
																	SKINTL
																	UOX
																	FRRS1
																	TMEM200B
																	PRAMEF4
																	PRAMEF13
																	SH2D5
																	C1orf130
																	LOC400752
																	C1orf141
																	GBP1P1
																	FLJ27354
																	MIR137HG
																	NBPF9
																	PRAMEF3
																	LDLRAD2
																	LOC402779
																	MIR101-1
																	MIR137
																	MIR186
																	MIR197
																	MIR30C1
																	MIR30E
																	LHX8
																	C1orf180
																	PRAMEF11
																	PRAMEF6
																	LOC440563
																	UQCRHL
																	MINOS1
																	FLJ32224
																	FAM183A
																	ZYG11A
																	FLJ31662
																	LOC440600
																	BCL2L15
																	PRAMEF7
																	PGCP1
																	GEMIN8P4
																	RBMXL1
																	LURAP1
																	PEF1
																	CYB5RL
																	SRG7
																	CYMP
																	KIAA0754
																	LOC643441
																	LOC644242
																	PPIAL4G
																	LOC644961
																	PPIAL4D
																	PRAMEF19
																	PRAMEF20
																	LOC646471
																	LOC646626
																	EMBP1
																	SRGAP2P2
																	LOC648740
																	LOC649330
																	ZBTB8A
																	NBPF6
																	LOC653160
																	PPIAL4B
																	LOC653513
																	GPR89A
																	LOC653566
																	PPIAL4C
																	PRAMEF22
																	PRAMEF15
																	FAM72B
																	PRAMEF16
																	SCARNA2
																	SCARNA1
																	SNORA44
																	SNORA55
																	SNORA61
																	SNORA59B
																	SNORA59A
																	SNORA16A
																	SNORD45C
																	SNORD85
																	SNORD99
																	SNORD103A
																	SNORD103B
																	MIR548D1
																	MIR553
																	ZBTB8B
																	LOC728431
																	PPIEL
																	CCDC30
																	FAM72D
																	LOC728855
																	LOC728875
																	NBPF24
																	GPR89C
																	NBPF16
																	PDZK1P1
																	PPIAL4F
																	RPS15AP10
																	LOC728989
																	LOC729041
																	LOC729059
																	HSD52
																	PRAMEF14
																	FLJ37453
																	LOC729970
																	LOC729987
																	PPIAL4E
																	PFN1P2
																	MIR942
																	MIR760
																	LOC100128071
																	LOC100128787
																	LOC100129046
																	LOC100129138
																	LOC100129196
																	LOC100129269
																	LOC100129620
																	LOC100129924
																	LOC100130000
																	LOC100130197
																	LOC100130557
																	LOC100131060
																	LOC100131564
																	NBPF10
																	ZRANB2-AS1
																	LOC100132774
																	LOC100286793
																	LOC100287722
																	LOC100289178
																	LOC100289211
																	MIR320B1
																	MIR1976
																	MIR1262
																	MIR761
																	MIR3115
																	MIR3117
																	MIR4255
																	MIR4253
																	MIR4256
																	MIR4254
																	MIR3659
																	MIR3917
																	MIR3605
																	MIR3671
																	MIR548AA1
																	MIR3675
																	LOC100505768
																	ZMYM6NB
																	LOC100506343
																	LOC100506730
																	LOC100506801
																	LOC100506963
																	LOC100507178
																	LOC100507423
																	LOC100507564
																	LOC100507634
																	FPGT-TNNI3K
																	GJA9-MYCBP
																	HEATR8-TTC4
																	TMEM56-RWDD3
																	C1orf151-NBL1
																	MIR4695
																	MIR4420
																	MIR4422
																	MIR4781
																	MIR4794
																	MIR4684
																	MIR4711
																	MIR2682
																	MIR4423
																	MIR378F
																	RCAN3AS
																	NEGR1-IT1
																	ZRANB2-AS2
[truncated: 23 more columns]

## Sheet: BreastOvarian_intersections
Group A	Group B	GISTIC dataset compared	Intersection	Union	Jaccard statistic	n_intersections
Breast tumors	Ovarian tumors	90% CI Amplifications	24813322	277532807	0.0894068	8
Breast tumors	Ovarian tumors	90% CI Deletions	133677051	585313196	0.228385	16

## Sheet: Breast_amp_genes.conf_90
cytoband	20q11.21	3q29	8p23.1	1q21.1	1q21.1	15q26.1	1p36.13	17q11.2	15q26.3	4p11	14q11.2	9q13	1q21.2	18p11.21	16p11.2	22q11.21	22q11.21	7p11.2	1p36.21	10q11.21	6p23	12p13.33	9p13.2	22q11.21	2q11.1	17q24.1	5p13.2	1q42.3	2q13	2q21.2	13q14.2	21p11.2	8q24.21	22q13.33	11q13.2	6q23.2	6p21.32	2q21.1	10p15.1	6q13	11p15.2	11p11.12	3p25.3	4p11	7q36.3	4q35.2	22q11.1	7q11.23	17p12
q value	8.4697e-11	6.4723e-10	1.5779e-07	6.4723e-10	4.6726e-10	1.3356e-06	2.8273e-06	3.6499e-06	3.1772e-06	5.9543e-07	1.6719e-05	1.6719e-05	2.8628e-08	4.979e-05	5.2855e-05	1.6719e-05	1.6719e-05	4.979e-05	0.00024643	0.00059628	4.979e-05	0.0008263	0.00062737	0.0012822	0.00019156	0.0059183	0.0064659	0.0067395	0.00066504	0.0067395	0.009509	0.0119	0.013219	0.017391	0.029607	0.031694	0.024068	0.01063	0.036256	0.039927	0.050137	0.050137	0.052825	0.0008263	0.080966	0.089171	0.055241	0.025273	0.12817
residual q value	8.4697e-11	6.4723e-10	1.5779e-07	3.7666e-07	1.0413e-06	2.2992e-06	2.8273e-06	3.6499e-06	4.7921e-06	1.3111e-05	1.6719e-05	3.0857e-05	4.979e-05	4.979e-05	5.2855e-05	7.3072e-05	7.3072e-05	7.4485e-05	0.00024643	0.00059628	0.00063229	0.0008263	0.0015063	0.0021702	0.0023983	0.0059183	0.0064659	0.0067395	0.0071587	0.0091357	0.009509	0.0119	0.013219	0.017391	0.029607	0.031694	0.033402	0.036256	0.036256	0.044453	0.050137	0.050137	0.052825	0.062986	0.080966	0.089171	0.10165	0.11311	0.12817
wide peak boundaries	chr20:29449503-29612125	chr3:195505980-195552524	chr8:12032587-12237831	chr1:121484494-143767777	chr1:145272622-145516321	chr15:93409895-93498928	chr1:16793506-16943042	chr17:29152435-29852345	chr15:102267489-102531392	chr4:48994139-49175238	chr14:1-20137967	chr9:67320930-68372630	chr1:147751332-148908496	chr18:13966507-14542889	chr16:32120118-32256071	chr22:20245540-20734618	chr22:21414418-21993809	chr7:57712310-57882723	chr1:12932941-13046401	chr10:42394580-42596953	chr6:12286310-24188769	chr12:149511-244029	chr9:36620592-37496565	chr22:18718181-18879946	chr2:96024494-96595109	chr17:61447299-77085498	chr5:33742121-34849661	chr1:233895771-235725420	chr2:114213286-114364420	chr2:133018828-133020719	chr13:48661588-49628108	chr21:1-10775344	chr8:99137236-146364022	chr22:49237186-49662351	chr11:67507659-67741189	chr6:133840115-136592479	chr6:32539719-32548666	chr2:132284263-132543721	chr10:1073696-11915175	chr6:73586995-74325881	chr11:11364052-16847457	chr11:48639783-55072350	chr3:1-10986866	chr4:49147238-49505108	chr7:156786921-157327966	chr4:189299764-190396615	chr22:1-16906827	chr7:74230436-74499450	chr17:11817372-12616493
genes in wide peak	FRG1B	MUC4	FAM86B1	hsa-mir-3118-3	PEX11B	hsa-mir-3175	NBPF1	EVI2A	hsa-mir-1302-10	CWH43	POTEG	ANKRD20A1	NBPF14	ZNF519	HERC2P4	RTN4R	UBE2L3	[ZNF716]	PRAMEF10	[LOC441666]	hsa-mir-548a-1	IQSEC3	PAX5	GGT3P	KCNIP3	hsa-mir-4316	AMACR	GNG4	hsa-mir-1302-3	[ANKRD30BL]	RCBTB2	TEKT4P2	hsa-mir-1234	LOC100128946	FAM86C2P	hsa-mir-548a-2	HLA-DRB1	C2orf27A	hsa-mir-3155	hsa-mir-4282	hsa-mir-4299	FOLH1	hsa-mir-885	[CWH43]	MNX1	HSP90AA4P	POTEH	PMS2P5	hsa-mir-744
			DEFB130	hsa-mir-3118-2	RBM8A	CHD2	CROCCP3	EVI2B	OR4F4		OR11H12	ANKRD20A3	PPIAL4A	CYP4F35P		DGCR6L	HIC2		PRAMEF8		E2F3		GRHPR		FAHD2A	hsa-mir-636	RAI14	TARBP1	DDX11L2		RB1	MIR3687	hsa-mir-939			EYA4		CCDC74A	ADARB2	EEF1A1	ARNTL	TRIM48	ATP2B2		UBE3C	LOC401164	OR11H1	WBSCR16	DNAH9
			FAM66A	hsa-mir-3118-1	TXNIP	MIR3175	MIR3675	NF1	WASH3P		POTEM	FAM27B	NBPF15	POTEC		RIMBP3	POM121L8P		PRAMEF4		EDN1		MELK		TRIM43	hsa-mir-635	SLC45A2	TBCE	CBWD2		ITM2B	MIR3648	hsa-mir-661			MYB		POTEKP	ATP5C1	MTO1	CALCA	OR4A5	CAV3		DNAJB6			GTF2IRD2	MAP2K4
			LOC100133267	LOC375010	POLR3GL	LOC100507217		OMG	OR4F6		LOC642426		FLJ39739	CXADRP3		TMEM191B	RIMBP3C		PRAMEF6		GMPR		ZBTB5		TRIM43B	hsa-mir-548d-2	RXFP3	GGPS1	FOXD4L1		LPAR6		hsa-mir-937			SGK1			CALML3	SLC17A5	CALCB	OR4C46	FANCD2		LOC645249			GATSL1	ZNF18
				FLJ39739	GNRHR2			ADAP2	OR4F15				PPIAL4D	ANKRD20A5P		PI4KAP1	YDJC		PRAMEF7		ID4		POLR1E			hsa-mir-634	ADAMTS12	TOMM20	WASH2P		FNDC3A		hsa-mir-1302-7			TCF21			AKR1C4	DDX43	COPB1	LOC120824	GRM7					STAG3L2	MYOCD
				PPIAL4G	LIX1L			TEFM	FAM138E				PPIAL4B			LOC729444	CCDC116		PRAMEF22		JARID2		ZCCHC7			hsa-mir-4315-2	C1QTNF3	RBM34	FAM138B		MED4		hsa-mir-151			TBPL1			KLF6	KCNQ5	PDE3B	OR4C13	IL5RA						FLJ34690
				LOC100130000	HFE2			ATAD5	GPCRLTM7				NBPF16				PI4KAP2				PRL		LOC100506710			AANAT	TTC23L	ARID4B			CYSLTR2		hsa-mir-30d			BCLAF1			AKR1C1	KHDC1	PSMA1	OR4C12	IRAK2						MIR744
				LOC100286793	ANKRD34A			RNF135	DDX11L1				PPIAL4F				LOC400891				ATXN1		MIR4540			ACOX1	C1QTNF3-AMACR	SLC35F3					hsa-mir-1208			HBS1L			AKR1C2	MB21D1	PTH	LOC283116	ITPR1
					NOTCH2NL			RAB11FIP4	DDX11L9				PPIAL4E				BCRP2				SOX4		MIR4475			BIRC5		B3GALNT2					hsa-mir-1207			PDE7B			GATA3	C6orf221	TEAD1	LOC440040	OGG1
					NBPF10			DPRXP4									RIMBP3B				TPMT		MIR4476			APOH		IRF2BP2					hsa-mir-1205			AHI1			GDI2	DPPA5	MICAL2	LOC440041	OXTR
								MIR4733									TMEM191C				DEK					CACNG1		C1orf31					hsa-mir-1204			ALDH8A1			IDI1	C6orf147	SPON1	LOC441601	SEC13
																					CD83					CD79B		SNORA14B					hsa-mir-548d-1			FAM54A			IL2RA	OOEP	C11orf58	TRIM64C	SETMAR
																					NUP153					CDK3		LINC00184					hsa-mir-2053			MGC34034			IL15RA	KHDC1L	RRAS2	LOC646813	SLC6A11
																					RANBP9					CSH1		LOC100506795					hsa-mir-548a-3			SLC2A12			ITIH2	MIR4282	DKK3		VHL
																					CAP2					CSH2		LOC100506810					hsa-mir-3151			LOC154092			PFKFB3		USP47		BRPF1
																					SIRT5					CSHL1		MIR4753					hsa-mir-1273			HMGA1P7			PFKP		SOX6		CAMK1
																					MYLIP					CYB561		MIR4671					hsa-mir-875			LINC00271			PRKCQ		PARVA		BHLHE40
																					TBC1D7					ACE							ADCY8			MIR3662			AKR1C3		FAR1		EDEM1
																					NOL7					DDX5							ANGPT1						USP6NL		BTBD10		TATDN2
																					FAM8A1					ERN1							ANXA13						NET1		MICALCL		SRGAP3
																					DCDC2					EVPL							ATP6V1C1						PITRM1		CYP2R1		ARPC4
																					GFOD1					BPTF							BAI1						CELF2		PLEKHA7		TADA3
																					CDKAL1					FDXR							COX6C						WDR37		CSNK2A1P		CHL1
																					CCDC90A					FOXJ1							CYC1						KIN		GALNTL4		THUMPD3
																					KIF13A					GALK1							CYP11B1						CALML5		INSC		TTLL3
																					DTNBP1					GH1							CYP11B2						ANKRD16		RASSF10		CNTN6
																					NRSN1					GH2							DPYS						FAM208B		MIR4299		LINC00312
																					MBOAT1					GRB2							EEF1D						IDI2-AS1		LOC100506305		LMCD1
																					HDGFL1					GRIN2C							EXT1						SFMBT2				C3orf32
																					KDM1B					H3F3B							GLI4						ECHDC3				TRNT1
																					RBM24					ICAM2							GML						ASB13				CRBN
																					RNF182					ICT1							GPR20						TUBAL3				GHRL
																					PHACTR1					ITGB4							GPT						ITIH5				ARL8B
																					RNF144B					KCNJ2							GRINA						AKR1E2				SETD5
																					NHLRC1					KCNJ16							HAS2						TAF3				TMEM111
																					FLJ23152					KPNA2							HSF1						FBXO18				BRK1
																					LINC00340					LGALS3BP							EIF3E						RBM17				RAD18
																					MIR548A1					LLGL2							KCNQ3						UCN3				LRRN1
																					LOC729177					MAP3K3							KCNS2						SFTA1P				CIDEC
																					LOC100130357					PECAM1							LY6E						LOC219731				MTMR14
																					MIR4639					PRKAR1A							LY6H						LOC254312				CRELD1
																										PRKCA							MYC						C10orf47				JAGN1
																										MAP2K6							NDUFB9						LOC282980				GHRLOS2
																										PRPSAP1							TONSL						LOC338588				IL17RC
																										PSMC5							NOV						AKR1CL1				C3orf24
																										PSMD12							ODF1						tAKR				IL17RE
																										RPL38							TNFRSF11B						LINC00200				CPNE9
																										SCN4A							ENPP2						LOC399708				CIDECP
																										SEC14L1							PLEC						LOC399715				CNTN4
																										SRSF2							POLR2K						FLJ45983				SUMF1
																										SMARCD2							POU5F1B						LOC439949				RPUSD3
																										SUMO2							PTK2						LOC439950				PRRT3
																										SOX9							PVT1						ADARB2-AS1				LOC285370
																										SRP68							RAD21						LOC100216001				LHFPL4
																										SSTR2							RPL8						MIR3155A				LOC401052
																										TIMP2							ST3GAL1						LOC100507034				LOC440944
																										TK1							SLA						LOC100507127				MIR885
																										AXIN2							SNTB1						MIR3155B				EGOT
																										DNAH17							SPAG1										GHRLOS
																										RGS9							SQLE										LOC100288428
																										GALR2							STK3										LOC100507582
																										SPHK1							TAF2										ARPC4-TTLL3
																										SOCS3							TG										MIR4790
																										SLC16A6							KLF10
																										SLC16A5							TRHR
																										SYNGR2							TRPS1
																										CYTH1							TSTA3
																										SLC9A3R1							COL14A1
																										COG1							YWHAZ
																										RECQL5							ZNF7
																										PGS1							ZNF16
																										KIAA0195							PSCA
																										HELZ							FZD6
																										DCAF7							LY6D
																										ABCA10							JRK
																										ABCA9							EIF3H
																										ABCA8							DGAT1
																										ATP5H							GPAA1
																										ST6GALNAC2							WISP1
																										GNA13							FOXH1
																										2020-09-09							EBAG9
																										CD300C							RECQL4
																										POLG2							LRRC14
																										CD300A							TTC35
																										TMC6							RIMS2
																										DDX42							MTSS1
																										ARSG							ZNF623
																										GGA3							KIAA0196
																										JMJD6							HHLA1
																										EXOC7							TRIB1
																										ABCA6							NDRG1
																										ABCA5							COLEC10
																										KCTD2							KHDRBS3
																										WBP2							POP1
																										CDC42EP4							PTP4A3
																										NOL11							RNF139
																										TANC2							ZHX1
																										NAT9							PUF60
																										PITPNC1							ZHX2
																										CACNG5							DENND3
																										CACNG4							ZC3H3
																										SAP30BP							EFR3A
																										NT5C							ARC
																										CDR2L							BOP1
																										MRPS7							ZFPM2
																										HN1							SCRIB
																										TACO1							LRRC6
																										AMZ2							DCAF13
																										SDK2							RNF19A
																										FAM20A							RGS22
																										TMEM104							FBXL6
																										C17orf80							OPLAH
																										WIPI1							PABPC1
																										ST6GALNAC1							KCNV1
																										TEX2							MTBP
																										GPRC5C							EIF2C2
																										CCDC47							COMMD5
																										MIF4GD							MRPL13
																										CASKIN2							ATAD2
																										USP36							ASAP1-IT1
																										TNRC6C							CPSF1
																										SLC25A19							LRP12
																										UBE2O							RRM2B
																										DNAI2							CYHR1
																										SMURF2							ASAP1
																										ENGASE							FAM135B
																										MRPL38							PHF20L1
																										MFSD11							ZNF706
																										ARMC7							VPS28
																										RHBDF2							FAM203A
																										NUP85							KCNK9
																										MYO15B							C8orf55
																										LIMD2							UBR5
																										KCNH6							FAM49B
																										QRICH2							AZIN1
																										FAM104A							CHRAC1
																										MGC16275							EXOSC4
																										FBF1							LY6K
																										UNK							TRMT12
																										CEP95							OXR1
																										TRIM47							WDYHV1
																										STRADA							SLC39A4
																										C17orf72							SYBU
																										OTOP2							GSDMC
																										TTYH2							ENY2
																										CYGB							SLURP1
																										RNF157							SLC45A4
																										C1QTNF1							ZFAT
																										FTSJ3							ZNF250
																										METTL23							DEPTOR
																										CANT1							PYCRL
																										USH1G							C8orf33
																										CD300LB							LYNX1
																										KIF19							C8orf51
																										AFMID							DSCC1
																										MGAT5B							DERL1
																										RBFOX3							GPR172A
																										CD300LF							GSDMD
																										C17orf77							NIPAL2
																										TCAM1P							BAALC
																										LOC146880							ZNF696
																										TMC8							GRHL2
																										CEP112							ARHGAP39
																										SLC39A11							ZNF34
																										AMZ2P1							SLC25A32
																										TRIM65							TM7SF4
																										UNC13D							SHARPIN
																										LINC00469							EPPK1
																										FADS6							SCRT1
																										C17orf28							TRAPPC9
																										TSEN54							TATDN1
																										FAM100B							NACAP1
																										TMEM235							NCALD
																										C17orf58							MAF1
																										MILR1							UTP23
																										RAB37							PARP10
																										CD300E							C8orf76
																										OTOP3							TIGD5
																										GPR142							NUDCD1
																										ZACN							FAM83A
																										LRRC37A3							PPP1R16A
																										BTBD17							MED30
																										KCNJ2-AS1							ZNF251
																										LINC00511							KIFC2
																										LOC400620							PKHD1L1
																										FLJ45079							NAPRT1
																										MXRA7							WDR67
																										PLEKHM1P							HPYR1
																										LOC440461							MFSD3
																										CPSF4L							MAL2
																										C17orf109							CSMD3
																										LINC00338							RHPN1
																										SCARNA16							FBXO32
																										SNORA76							CTHRC1
																										SNORD1A							OSR2
																										SNORD1B							TOP1MT
																										SNORD1C							ZNF572
																										SNORD104							ABRA
																										MIR634							LYPD2
																										MIR635							TMEM71
																										MIR636							TMEM65
																										LOC729683							LOC157381
																										PRCD							C8orf56
																										SNORA38B							ANKRD46
																										C17orf110							FAM84B
																										LOC100131096							VPS13B
																										CD300LD							TMEM74
																										TEN1							FAM91A1
																										C17orf99							SLC30A8
																										LOC100287042							COL22A1
																										MIR4316							SNX31
																										MIR4315-2							ADCK5
																										MIR4315-1							TSNARE1
																										LOC100499466							MAPK15
																										LOC100499467							NSMCE2
																										MIR3678							ZNF707
																										MIR3615							BREA2
																										LOC100507218							FAM83H
																										LOC100507246							LOC286094
																										LOC100507351							ZNF252
																										LOC100507410							TMED10P1
																										TEN1-CDK3							C8orf77
																										MIR4738							C8orf31
																										MIR4524A							ZFP41
																										MIR3064							FBXO43
																										MIR5047							GPIHBP1
																										LOC100653515							KLHL38
																																	NRBP2
																																	ZNF517
																																	KIAA1875
																																	C8ORFK29
																																	RSPO2
																																	SPATC1
																																	FLJ43860
																																	MAFA
																																	SAMD12
																																	MIR30B
																																	MIR30D
																																	C8orf82
																																	FER1L6-AS1
																																	FLJ42969
																																	C8orf85
																																	LRRC24
																																	SAMD12-AS1
																																	ZFAT-AS1
																																	HAS2-AS1
																																	LINC00051
																																	C8orf73
																																	SCXB
																																	RAD21-AS1
																																	FER1L6
																																	MIR599
																																	MIR661
																																	LOC727677
																																	HEATR7A
																																	LOC728724
																																	OC90
																																	LOC731779
																																	MIR875
																																	MIR937
																																	MIR939
																																	LOC100128338
																																	SCXA
																																	LOC100130231
																																	CCDC166
																																	LOC100131726
																																	LOC100133669
																																	LOC100288181
																																	MIR1205
																																	MIR1206
																																	MIR1207
																																	MIR1204
																																	MIR1234
																																	MIR2053
																																	MIR1208
																																	MIR3151
																																	LOC100499183
																																	MIR3610
																																	LOC100507117
																																	ZHX1-C8ORF76
																																	MIR4663
																																	MIR4472-1
																																	MIR4664
																																	MIR4471
																																	PCAT1
																																	LINC00536
[truncated: 10 more columns]

## Sheet: Breast_del_genes.conf_90
cytoband	10q11.21	16p11.2	17p11.2	14q11.2	2q21.2	11p15.5	7p11.2	15q11.1	14q32.33	22q11.1	4p11	20q11.21	7q22.1	1p36.32	7q11.21	11p11.2	2q37.3	10q26.3	19p13.3	1p11.2	6p11.1	17p11.2	11q24.1	19p12	2p25.1	4q35.2	11p15.4	19q13.32	8p23.1	10q23.31	1p36.13	2p11.1	14q32.33	12q13.13	10q11.23	13q12.11	4p16.2	9q13	20p11.1	9q34.3	5q35.3	7q34	9q34.11	6p22.1	19q13.42	8p23.1	15q21.1	8q24.3	18q23
q value	1.8728e-19	1.746e-13	7.131e-17	2.4398e-10	4.9674e-10	1.1646e-11	1.2746e-06	8.6396e-06	4.7458e-09	5.5285e-05	8.912e-05	1.3658e-05	0.00013687	3.0841e-06	2.3769e-05	0.00055436	0.0021388	0.0003677	0.0027392	0.0031084	0.0037082	5.132e-11	0.0045546	0.004946	0.0076436	0.0082146	7.882e-06	0.0084065	0.0053235	0.010878	4.0239e-05	0.012329	2.2443e-07	0.015716	0.0077533	0.019035	0.024166	0.0045997	0.0032316	0.0025281	0.083224	0.08621	0.0098345	0.11861	0.017419	0.049517	0.025677	0.13592	0.13592
residual q value	3.1637e-19	1.746e-13	9.7222e-13	2.4398e-10	4.9674e-10	1.2957e-09	1.7858e-05	2.3083e-05	2.7508e-05	5.6051e-05	9.1039e-05	0.00011358	0.00013452	0.00017777	0.00039212	0.0019838	0.0022376	0.0027241	0.0027392	0.0031084	0.0038111	0.0038111	0.0045131	0.0048663	0.0076436	0.0085303	0.0098345	0.010135	0.010847	0.010847	0.011573	0.012123	0.012123	0.01637	0.017963	0.019244	0.023375	0.023375	0.057118	0.073797	0.083401	0.08674	0.1015	0.11677	0.11677	0.12465	0.12465	0.13592	0.13592
wide peak boundaries	chr10:38740383-42831642	chr16:33066606-33965710	chr17:21217597-21436435	chr14:1-20228301	chr2:132553370-133472251	chr11:991558-1078333	chr7:56178026-56708024	chr15:1-22376302	chr14:106429909-106940305	chr22:1-17075981	chr4:48900040-53476753	chr20:26189081-29642007	chr7:100458796-100612944	chr1:2494616-2940089	chr7:57523869-63205652	chr11:48346962-48514623	chr2:237167400-238236025	chr10:134259575-135534747	chr19:1-6216112	chr1:120928089-143767521	chr6:57029473-63988797	chr17:20799120-21285075	chr11:111279294-135006516	chr19:23780926-29282027	chr2:1-9000688	chr4:187640856-191154276	chr11:1001525-89968472	chr19:41195132-51816148	chr8:7278935-8090412	chr10:89493100-91162580	chr1:16775832-16890920	chr2:89082566-95698771	chr14:106741815-107349540	chr12:45586260-61625022	chr10:50745121-51557228	chr13:1-19999926	chr4:1-10079771	chr9:44790454-67018201	chr20:25507269-25995425	chr9:134405746-141213431	chr5:177473342-180915260	chr7:131240219-159138663	chr9:110249759-141213431	chr6:29795137-29910339	chr19:54674827-54755910	chr8:12254568-12583418	chr15:31057725-60714704	chr8:7199296-146364022	chr18:74979668-78077248
genes in wide peak	ACTR3BP5	hsa-mir-1826	KCNJ12	OR11H2	hsa-mir-663b	MUC6	DKFZp434L192	hsa-mir-3118-6	ADAM6	POTEH	SGCB	MLLT10P1	ACHE	MMEL1	hsa-mir-4283-2	OR4A47	COPS8	hsa-mir-202	hsa-mir-7-3	hsa-mir-3118-3	hsa-mir-548u	MAP2K3	hsa-mir-3167	ZNF254	ACP1	FRG1	hsa-mir-3166	hsa-mir-150	hsa-mir-548i-3	ACTA2	CROCCP3	LOC90499	LINC00226	hsa-mir-26a-2	CHAT	TUBA3C	hsa-mir-548i-2	FAM75A7	ZNF337	hsa-mir-602	hsa-mir-340	hsa-mir-595	hsa-mir-602	HLA-H	RPS9	FAM90A25P	hsa-mir-2116	hsa-mir-1234	NFATC1
		TP53TG3	KCNJ18	POTEG	GPR39		LOC389493	hsa-mir-3118-4	LINC00226	OR11H1	DCUN1D4	FRG1B	TRIP6	FAM213B	LOC643955	OR4C45	CXCR7	ADAM8	hsa-mir-637	hsa-mir-3118-2	PRIM2	TMEM11	hsa-mir-100	LOC148189	ID2	HSP90AA4P	hsa-mir-4300	hsa-mir-4324	DEFB4A	FAS	MIR3675	TEKT4	LINC00221	hsa-mir-616	SLC18A3	PHF2P1	hsa-mir-95	KGFLP1	NANP	hsa-mir-4292	hsa-mir-1229	hsa-mir-153-2	hsa-mir-4292	HCG4B	LILRB3	FAM86B2	hsa-mir-628	hsa-mir-939	CTDP1
		LOC390705		OR11H12	LYPD1		LOC650226	NBEAP1		CCT8L2	CWH43		SRRT	ACTRT2	LOC100287704		IQCA1	CYP2E1	hsa-mir-4321	hsa-mir-3118-1	BAG2	USP22	hsa-mir-4301	ZNF681	RPS7	DUX4	hsa-mir-708	hsa-mir-220c	SPAG11B	IFIT2		ACTR3BP2		hsa-mir-1228	PARG	ANKRD20A9P	hsa-mir-4274	FAM74A4	FAM182B	hsa-mir-126	CANX	hsa-mir-671	hsa-mir-126		TSEN34	LOC100506990	hsa-mir-1266	hsa-mir-661	TXNL4A
		LINC00273		OR4Q3	ANKRD30BL			HERC2P3			SPATA18		UFSP1	TTC34	LOC100287834			ECHS1	hsa-mir-1909	LOC375010	RAB23	DHRS7B	hsa-mir-34c	ZNF675	SOX11	DUX2	hsa-mir-326	hsa-mir-3191	DEFB103B	IFIT3		LOC442028		hsa-mir-148b	OGDHL	LINC00442	hsa-mir-943	LOC442421		ABCA2	FLT4	hsa-mir-1975	hsa-mir-219-2		MBOAT7		hsa-mir-147b	hsa-mir-937	ADNP2
		TP53TG3C		POTEM	MIR663B			POTEB			LRRC66				MIR4283-2			INPP5A	hsa-mir-3187	FLJ39739	KHDRBS2	C17orf103	ACRV1	RPSAP58	TPO	ZFP42	hsa-mir-139	hsa-mir-320e	DEFB104A	LIPA		GGT8P		hsa-mir-615	C10orf53	ANKRD26P3	hsa-mir-571	FAM27A		ABO	GRM6	hsa-mir-548f-4	hsa-mir-3154		LILRA6		hsa-mir-1282	hsa-mir-1302-7	KCNG2
		TP53TG3B		LOC642426				LOC348120							MIR4283-1			UTF1	hsa-mir-1302-11	EMBP1	GUSBP4		APLP2	ZNF726	TSSC1	TRIML2	hsa-mir-3165	hsa-mir-769	DEFB105A	PTEN		LOC654342		hsa-mir-196a-2	AGAP7	LINC00421	ADD1	LOC643648		C8G	HNRNPAB	hsa-mir-490	hsa-mir-2861				hsa-mir-627	hsa-mir-151	SALL3
								OR4M2										TUBGCP2	AES	LOC100130000			APOA1	LOC100101266	PXDN	LOC339975	hsa-mir-548k	hsa-mir-642	DEFB106A	LIPF		ANKRD20A8P		hsa-mir-1293	AGAP8		ADRA2C	FAM74A2		CACNA1B	HNRNPH1	ABP1	hsa-mir-181b-2				hsa-mir-4310	hsa-mir-30d	RBFA
								NF1P2										DUX4	AMH	LOC100286793			APOA4		RNF144A	TRIML1	hsa-mir-3164	hsa-mir-4323	DEFB107A	CH25H		MIR4436A		hsa-mir-1291	LOC728407		ATP5I	FAM75A5		ENTPD2	LTC4S	AKR1B1	hsa-mir-601				hsa-mir-626	hsa-mir-1208	PQLC1
								CHEK2P2										DUX2	ATP5D				APOC3		MYT1L	LOC401164	hsa-mir-3163	AP2A1	DEFB103A	RNLS				ACCN2			CRMP1	FAM27C		CEL	MGAT1	BPGM	hsa-mir-600				hsa-mir-1233-2	hsa-mir-1207	PARD6G
								LOC646214										VENTX	AZU1				ARCN1		SH3YL1	DUX4L4	hsa-mir-612	APOC1	FAM90A13	STAMBPL1				ACVR1B			CTBP1			CELP	MAPK9	BRAF	hsa-mir-147				hsa-mir-1233-1	hsa-mir-1205	ATP9B
								CXADRP2										CALY	HCN2				FXYD2		TRAPPC12	FRG2	hsa-mir-194-2	APOC1P1	FAM90A7	ATAD1				ACVRL1			DGKQ			COL5A1	ZNF354A	CALD1	hsa-mir-455				hsa-mir-211	hsa-mir-1204	HSBP1L1
								GOLGA6L6										TTC40	BSG				CXCR5		SNTG2	DUX4L6	hsa-mir-1237	APOC2	FAM90A8	ANKRD22				ADCY6			DRD5			DBH	SQSTM1	CASP2	hsa-mir-32				ACTC1	hsa-mir-548d-1	LOC100130522
								LOC727924										GPR123	CAPS				CBL		ADI1	DUX4L5	hsa-mir-1908	APOC4	FAM90A18	LIPJ				AMHR2			EVC			SARDH	ADAMTS2	CDK5	ABCA2				ADAM10	hsa-mir-2053
								GOLGA8C										NKX6-2	CDC34				CD3D		ALLC	DUX4L3	hsa-mir-3162	APOE	FAM90A9	CFL1P1				APOF			FGFR3			FCN1	MAML1	CHRM2	ABL1				ANXA2	hsa-mir-548a-3
																		KNDC1	CIRBP				CD3E		KIDINS220	DUX4L2	hsa-mir-130a	KLK3	FAM90A10	LIPM				AQP2			GAK			FCN2	GFPT2	CLCN1	ABO				AQP9	hsa-mir-3151
																		MTG1	CNN2				CD3G		COLEC11	LOC100288255	hsa-mir-3161	ATP1A3	DEFB107B	IFIT1B				AQP5			GRK4			FUT7	GNB2L1	DPP6	AK1				B2M	hsa-mir-1273
																		SYCE1	CSNK1G2				CHEK1		RSAD2		hsa-mir-3160-2	AXL	DEFB104B	LIPK				AQP6			HTT			RAPGEF1	BTNL3	EN2	ALAD				BNIP2	hsa-mir-875
																		PRAP1	DAPK3				CRYAB		CMPK2		hsa-mir-129-2	BAX	DEFB106B	LIPN				ARF3			HGFAC			GRIN1	MGAT4B	EPHA1	AMBP				BUB1B	hsa-mir-3150
																		ZNF511	CFD				DDX6		TMEM18		hsa-mir-610	BCAT2	DEFB105B	KLLN				ATF1			HMX1			LCN1	TBC1D9B	EPHB6	ASS1				CAPN3	hsa-mir-3149
																		PAOX	ARID3A				DLAT		LOC150622		hsa-mir-3159	BCKDHA	DEFB109P1B	FAS-AS1				ATP5B			IDUA			NOTCH1	N4BP3	EZH2	C5				CHRM5	hsa-mir-2052
																		C10orf125	EEF2				DPAGT1		RNASEH1		hsa-mir-4299	BCL3	FAM90A14	MIR4679-1				ATP5G2			LETM1			PAEP	OR4F3	GBX1	C8G				CHRNA7	hsa-mir-124-2
																		LOC399829	EFNA2				DRD2		FAM150B		hsa-mir-302e	CEACAM1	SPAG11A	MIR4679-2				CACNB3			LRPAP1			PTGDS	ZNF354C	MNX1	CACNA1B				CKMT1B	hsa-mir-486
																		SPRNP1	ELANE				ETS1		LOC339788		hsa-mir-483	C5AR1	FAM90A19					CCNT1			MSX1			RALGDS	C5orf45	HTR5A	CCBL1				CYP19A1	hsa-mir-3148
																		FRG2B	FUT3				FLI1		LINC00299		hsa-mir-675	CA11	FAM66E					CD63			MYL5			RPL7A	NHP2	INSIG1	TNFSF8				DUT	hsa-mir-4288
																		SPRN	FUT5				SLC37A4		LOC339822		hsa-mir-4298	CALM3	LOC100132396					CDK2			PDE6B			RXRA	RNF130	KCNH2	ENTPD2				EPB42	hsa-mir-4287
																		MIR202	FUT6				GRIK4		LOC386597		ACP2	CD33	MIR548I3					CDK4			PPP2R2C			SNAPC4	CLK4	KEL	CDK9				FBN1	hsa-mir-548h-4
																		LOC619207	GAMT				H2AFX		LOC400940		ACTN3	CD37						COL2A1			RGS12			SURF1	CNOT6	NDUFB2	CEL				FGF7	hsa-mir-320a
																		DUX4L7	GNA11				HMBS		LINC00487		ADM	CD79A						CS			RNF4			SURF2	GMCL1P1	NOS3	CELP				GABPB1	hsa-mir-548v
																		DUX4L6	GNA15				HSPA8		FAM110C		ADRBK1	CEACAM5						CYP27B1			S100P			SURF4	RMND5B	CNOT4	COL5A1				GALK2	hsa-mir-383
																		DUX4L5	GNG7				HSPB2		LOC727982		APLNR	CGB						DGKA			SH3BP2			MED22	BTNL8	PIP	SLC31A1				GANC	hsa-mir-598
																		DUX4L3	MKNK2				HTR3A		LOC730811		ALDH3B1	CEACAM3						DDIT3			WFS1			SURF6	ZFP2	PRSS1	SLC31A2				GATM	hsa-mir-1322
																		DUX4L2	GPX4				IL10RA		LOC100505964		ALDH3B2	CEACAM7						EIF4B			WHSC1			TRAF2	RUFY1	PRSS2	CRAT				GCHFR	hsa-mir-4286
																		MIR3944	GZMM				IL18		LOC100506054		AMPD3	CEACAM8						CELA1			WHSC2			TSC1	OR4F16	TAS2R38	DBC1				PDIA3	hsa-mir-124-1
																			MATK				STT3A		LOC100506274		APBB1	CEACAM4						ERBB3			ZNF141			TTF1	TRIM7	PTN	DBH				GTF2A2	hsa-mir-597
																			GADD45B				KCNJ1				RHOG	CKM						B4GALNT1			SLBP			VAV2	TRIM52	PTPRN2	SARDH				HDC	hsa-mir-548i-3
																			NFIC				KCNJ5				ARHGAP1	AP2S1						BLOC1S1			ACOX3			BRD3	AGXT2L2	RARRES2	DNM1				ONECUT1	NAT1
																			NRTN				VWA5A				PHOX2A	CLPTM1						GLI1			CPZ			LHX3	TRIM41	RHEB	TOR1A				ITPKA	NAT2
																			OAZ1				MCAM				ARL2	CRX						GPD1			NOP14			GFI1B	COL23A1	SHH	LPAR1				IVD	ADCY8
																			PALM				MLL				ARNTL	CYP2A6						NCKAP1L			FAM193A			SSNA1	SCGB3A1	SLC4A2	MEGF9				LIPC	ADRA1A
																			POLR2E				NCAM1				ARRB1	CYP2A7						NR4A1			KIAA0232			EDF1	ZNF354B	SMARCD3	ENDOG				LTK	ADRB3
																			POLRMT				NFRKB				ART1	CYP2A13						HNRNPA1			C4orf6			CLIC3	OR2Y1	AKR1D1	ENG				MAP1A	ANGPT1
																			MAP2K2				NNMT				ASCL2	CYP2B6						HOXC4			MFSD10			GTF3C5	BTNL9	SSBP1	STOM				MEIS2	ANK1
																			PRTN3				NRGN				BAD	CYP2B7P1						HOXC5			MAEA			GTF3C4	RASGEF1C	TBXAS1	FCN1				MFAP1	ANXA13
																			PTBP1				OPCML				BBS1	CYP2F1						HOXC6			PCGF3			MED27	OR2V2	VIPR2	FCN2				TRPM1	ASAH1
																			PTPRS				PAFAH1B2				CCND1	DBP						HOXC8			SPON2			ADAMTSL2	ZNF454	XRCC2	FPGS				MYO1E	ASPH
																			RFX2				PPP2R1B				BDNF	DMPK						HOXC9			TACC3			PPP1R26	C5orf60	ZYX	NR5A1				MYO5A	ATP6V1B2
																			RPS15				PTS				SERPING1	DMWD						HOXC10			MXD4			SEC16A	ZNF879	ARHGEF5	FUT7				NEDD4	ATP6V1C1
																			SAFB				PVRL1				CAPN5	MEGF8						HOXC11			CPLX1			TUBB4B	MIR340	ZNF212	NR6A1				PLCB2	BAI1
																			SGTA				RPS25				C11orf2	EMP3						HOXC12			SLC26A1			UBAC1	SNORD95	ZNF282	GGTA1P				MAPK6	BLK
																			SH3GL1				SC5DL				MRPL49	ERCC1						HOXC13			MAN2B2			OLFM1	SNORD96A	CUL1	GLE1				RAB27A	BMP1
																			STK11				SCN2B				ZNHIT2	ERCC2						IGFBP6			D4S234E			AGPAT2	ZFP62	TRIM24	GNG10				RAD51	POLR3D
																			TBXA2R				SCN4B				MPPED2	ERF						INHBC			GPR78			SDCCAG3	CBY3	MGAM	GOLGA1				RYR3	BNIP3L
																			TCF3				SDHD				C11orf9	FCGRT						ITGA5			STX18			NOXA1	AACSP1	DGKI	GOLGA2				SCG5	OSGIN2
																			THOP1				ST3GAL4				C11orf10	FLT3LG						ITGA7			FGFRL1			WDR5	LOC729678	ACCN3	GPR21				SLC12A1	CA1
																			TLE2				SORL1				DAGLA	FOSB						ITGB7			CYTL1			C9orf9	OR4F29	PDIA4	RAPGEF1				SORD	CA2
																			MADCAM1				SRPR				CALCA	FTL						KIF5A			SH3TC1			ADAMTS13	LOC100132062	UBE3C	GRIN1				SPINT1	CA3
																			SF3A2				ST14				CALCB	FUT1						KRT1			PIGG			C9orf7	LOC100132287	FAM131B	GSN				SRP14	CA8
																			RANBP3				TAGLN				CAPN1	FUT2						KRT2			CNO			SLC2A6	LOC100133331	FAM115A	HSPA5				TCF12	CALB1
																			PPAP2C				TECTA				CARS	GIPR						KRT3			STK32B			MAN1B1	MIR1229	DNAJB6	TNC				THBS1	RUNX1T1
																			S1PR4				THY1				CAT	GPR4						KRT4			LYAR			SETX	MIR4638	ABCF2	LCN1				TP53BP1	CDH17
																			AP3D1				UPK2				SERPINH1	GPR32						KRT5			SLC2A9			PMPCA	LOC100859930	FASTK	LCN2				TYRO3	CEBPD
																			LONP1				ZBTB16				CCKBR	GRIK5						KRT6A			TBC1D14			COBRA1		ABCB8	LMX1B				SLC30A4	CHRNA2
																			APBA3				ZNF202				CD5	GRIN2D						KRT6B			SORCS2			NELF		PAXIP1	MUSK				EIF3J	CHRNB3
																			SAFB2				BARX2				CD6	ARHGAP35						KRT7			KIAA1530			GPSM1		SSPO	NDUFA8				JMJD7-PLA2G4B	CLU
																			MED16				ZNF259				MS4A1	GSK3A						KRT8			ZFYVE28			DKFZP434A062		NUP205	NOTCH1				SNAP23	COX6C
																			CHAF1A				USP2				MS4A3	GYS1						KRT18			AFAP1			GBGT1		CLEC5A	ODF2				ALDH1A2	CRH
																			EBI3				PCSK7				CD44	FOXA3						KRT81			TNIP2			SNORD36C		MKRN1	ORM1				USP8	CTSB
																			PLIN3				HTR3B				CD59	HRC						KRT82			HAUS3			SNORD36B		CNTNAP2	ORM2				CCNB2	CYC1
																			FSTL3				ZW10				CD81	PRMT1						KRT83			ABCA11P			SNORD36A		GIMAP2	PAEP				SLC28A2	CYP7A1
																			APC2				UBE4A				CDKN1C	IRF3						KRT84			GRPEL1			SNORD24		OR2F1	PAPPA				CCPG1	CYP11B1
																			ABCA7				EI24				CFL1	KCNA7						KRT85			MFSD7			NDOR1		SLC13A4	PDCL				GCNT3	CYP11B2
																			HMG20B				FEZ1				CTSC	KCNC3						KRT86			TMEM175			PHPT1		TPK1	PBX3				COPS2	ADAM3A
																			SEMA6B				ARHGAP32				CHKA	KCNJ14						LALBA			ABLIM2			ANAPC2		DENND2A	PPP2R4				TGM5	DECR1
																			UQCR11				C2CD2L				CHRM1	KCNN4						LRP1			AFAP1-AS1			DPP7		ZNF777	PPP6C				PIGB	DEFB4A
																			SBNO2				RBM7				CHRM4	KLK1						MARS			TMEM128			OBP2B		TMEM176B	PSMB7				PPIP5K1	DPYS
																			KDM4B				MPZL2				TPP1	KLK2						METTL1			C4orf42			OBP2A		HIPK2	PSMD5				AQR	DPYSL2
																			ZFR2				HYOU1				CLNS1A	LHB						MIP			TMEM129			MRPS2		WDR91	PTGDS				SECISBP2L	DUSP4
																			PIP5K1C				ATP5L				CNGA4	LIG1						MMP19			MRFAP1			EGFL7		REPIN1	PTGS1				ARHGAP11A	E2F5
																			HMHA1				ADAMTS8				CNTF	LIPE						MYL6			LOC93622			FBXW5		ATP6V0A4	PTPN3				LCMT2	EEF1D
																			SHC2				TREH				COPB1	BCAM						MYO1A			TADA2B			C9orf167		TAS2R3	RALGDS				SLC12A6	EGR3
																			RPL36				CEP164				COX8A	MYBPC2						NAB2			HTRA3			EXD3		TAS2R4	RGS3				BCL2L10	EIF4EBP1
																			TIMM13				IGSF9B				CPT1A	CEACAM6						NACA			MRFAP1L1			C9orf86		PRKAG2	RPL7A				RASGRP1	EPB49
																			DAZAP1				PHLDB1				CRY2	NOVA2						NFE2			EVC2			INPP5E		LUC7L2	RPL12				SERF2	EPHX2
																			SNORD37				SIK2				CST6	NPAS1						SLC11A2			OTOP1			NPDC1		MRPS33	RXRA				GNB5	EXT1
																			FGF22				NCAPD3				CSTF3	NTF4						PA2G4			ZNF595			BARHL1		NUB1	SET				ARPP19	EXTL3
																			TJP3				ARHGEF12				CTNND1	NUCB1						PCBP2			JAKMIP1			REXO4		TAS2R5	SNAPC4				SLC27A2	EYA1
																			ITGB1BP3				SIK3				CTSD	PAFAH1B3						PDE1B			FAM53A			KCNT1		CHPF2	SPTAN1				GPR176	FABP4
																			UHRF1				VSIG2				CTSW	PLAUR						PFDN5			METTL19			CARD9		NCAPG2	STXBP1				CHP	FABP5
																			SLC39A3				BACE1				DDB1	POLD1						PFKM			ZBTB49			DDX31		CHCHD3	SURF1				OIP5	PTK2B
																			THEG				TRIM29				DDB2	POU2F2						POU6F1			ZNF721			MRPL41		WDR60	SURF2				BAHD1	FDFT1
																			ZBTB7A				CADM1				DHCR7	PPP5C						PPP1R1A			ZNF718			EHMT1		TMEM140	SURF4				FAN1	FGFR1
																			FZR1				POU2F3				DLG2	PRRG2						PRIM1			CCDC96			NTNG2		GIMAP4	MED22				CEP152	FGL1
																			SIRT6				HINFP				DUSP8	KLK7						PRKAG1			CRIPAK			KIAA1984		GIMAP5	SURF6				MAPKBP1	FNTA
																			PIAS4				REXO2				EEF1G	KLK6						PRPH			LOC285484			SNHG7		TMEM176A	TLR4				GOLGA8A	ADAM2
																			LSM7				OR8G2				EIF4G2	KLK10						RAB5B			DOK7			TMEM141		TRPV6	TRAF1				RTF1	GATA4
																			MBD3				OR8B8				ELF5	PSG1						RARG			FLJ35424			C9orf37		AGK	TRAF2				MGA	GEM
																			MIER2				OR8G1				MARK2	PSG2						RBMS2			RNF212			SAPCD2		TRPV5	TSC1				DMXL2	GFRA2
																			PCSK4				TIMM8B				CTTN	PSG3						RDH5			C4orf10			C9orf69		ZC3HAV1	TTF1				VPS39	GLI4
																			C19orf24				OR8B2				ESRRA	PSG4						RPL41			NAT8L			UAP1L1		AKR1B10	TXN				AP4E1	GML
																			PLEKHJ1				ACAD8				EXT2	PSG5						RPS26			C4orf44			ARRDC1		ACTR3B	UGCG				CCNDBP1	GNRH1
																			FEM1A				B3GAT1				F2	PSG6						TSPAN31			FAM86EP			WDR85		KIAA1147	VAV2				EID1	NPBWR1
																			STAP2				DCPS				FANCF	PSG7						SCN8A			POLN			TMEM203		ESYT2	ZFP37				C15orf63	GPR20
																			BTBD2				ZBTB44				FAU	PSG9						SHMT2			USP17L6P			ZMYND19		ZNF398	ZNF79				TMEM87A	GPT
																			RNF126				THYN1				MS4A2	PSG11						PMEL			USP17			NACC2		KIAA1549	BRD3				RPAP1	GRINA
																			CCDC94				DDX25				FEN1	PTGIR						SMARCC2			C4orf48			C9orf116		MLL3	NUP214				PYGO1	GSR
																			C19orf10				NTM				FGF3	PVR						SMARCD1			LOC402160			LCN8		EXOC4	LHX3				PLDN	GTF2E2
																			NCLN				CDON				FGF4	PVRL2						SP1			ZNF876P			FAM69B		GALNT11	GFI1B				GREM1	HAS2
																			SPPL2B				SIDT2				FKBP2	RELB						STAT2			DEFB131			SLC34A3		LMBR1	IKBKAP				FOXB1	NRG1
																			DUS3L				TRAPPC4				FOLH1	RPL18						STAT6			LOC650293			CAMSAP1		LINC00244	SSNA1				RPUSD2	HNF4G
																			SHD				SPA17				FOLR1	RPS11						SUOX			ZNF732			C9orf163		NOM1	EDF1				TUBGCP4	HSF1
																			WDR18				FXYD6				FOLR2	RPS19						TAC3			SCARNA22			MAMDC4		PARP12	CTNNAL1				SCG3	IKBKB
																			REXO1				SIAE				FOLR3	RRAS						TARBP2			LOC728369			LCN6		CREB3L2	DPM2				TMOD3	IL7
																			ZNF77				C11orf71				FSHB	RTN2						TMBIM6			LOC728373			AK8		LRRC61	FUBP3				TMOD2	IMPA1
																			C19orf29				ROBO4				FTH1	CLEC11A						TFCP2			LOC728379			C9orf96		C7orf49	CLIC3				EHD4	IDO1
																			CELF5				BTG4				LRRC32	SEPW1						VDR			USP17L5			QSOX2		ZNF767	PRPF4				DUOX2	EIF3E
																			FSD1				FAM55D				GAS2	SLC1A5						WNT1			LOC728393			LINC00094		TTC26	GTF3C5				MYEF2	KCNQ3
																			TLE6				TTC12				GIF	SLC8A2						WNT10B			LOC728400			LCN12		JHDM1D	GTF3C4				NDUFAF1	KCNS2
																			LPPR3				C11orf57				GNG3	SNRNP70						MAP3K12			LOC728405			C9orf142		TMUB1	LHX2				RSL24D1	LOXL2
																			ZNF556				FOXRED1				GRM5	SNRPA						TUBA1A			FLJ36777			TPRN		SLC37A3	MED27				NUSAP1	LPL
																			UBXN6				SCN3B				GSTP1	SNRPD2						MLL2			PSAPL1			GLT6D1		KRBA1	PTGES				TMEM85	LY6E
																			OR4F17				VPS11				GTF2H1	SPIB						AAAS			MIR943			PNPLA7		SLC35B4	ATP6V1G1				SPTBN5	LY6H
																			ACSBG2				TEX12				HBB	SULT2B1						SOAT2			LOC100129917			C9orf169		OR6W1P	RALGPS1				CTDSPL2	LYN
																			FAM108A1				CRTAM				HBBP1	SULT2A1						RDH16			LOC100129931			ENTPD8		ADCK2	ADAMTSL2				KLF13	MATN2
																			DOHH				TMPRSS4				HBD	TGFB1						NPFF			LOC100130872			C9orf171		PLXNA4	PPP1R26				DUOX1	MCM4
																			KLF16				IFT46				HBE1	TULP2						HSD17B6			LOC100133461			LCN15		ZC3HAV1L	SEC16A				DLL4	MMP16
																			DOT1L				PRDM10				HBG1	NR1H2						ENDOU			MIR548I2			C9orf172		LOC93432	TNFSF15				INO80	MOS
																			KISS1R				DSCAML1				HBG2	VASP						TIMELESS			TMED11P			LRRC26		C7orf29	PTBP3				FAM63B	MSR1
																			CREB3L3				GRAMD1B				SLC29A2	XRCC1						KRT75			MIR4274			TMEM8C		AGAP3	SH2D3C				RNF111	MSRA
																			HDGFRP2				USP28				HPX	ZNF45						SCAF11			LOC100507266			LCN9		C7orf13	RABEPK				ZNF280D	MYBL1
																			LMNB2				PKNOX2				DNAJC4	ZNF221						SLC16A7			MIR378D1			LOC401557		OR9A4	LAMC3				TRPM7	MYC
																			RAX2				TP53AIP1				IGF2	ZNF222						DDX23			MIR4800			LCNL1		OR9A2	TUBB4B				PPP1R14D	NBN
																			MUM1				ABCG4				IGHMBP2	ZNF155						SLC4A8			MIR4798			C9orf139		C7orf34	UBAC1				MTMR10	NDUFB9
																			MPND				ROBO3				ILK	ZNF180						ESPL1			HTT-AS1			FAM166A		TMEM139	OLFM1				ZNF770	NEFM
																			ATCAY				C11orf1				INCENP	ZNF223						DAZAP2						SOHLH1		NOBOX	ZER1				FLJ10038	NEFL
																			MIDN				RNF26				INS	ZNF224						KIAA0748						MIR126		OR2A14	AGPAT2				HAUS2	TONSL
																			DPP9				FAM118B				INPPL1	ZNF225						ZBTB39						LCN10		OR6B1	POMT1				FAM82A2	NKX3-1
																			R3HDM4				NLRX1				CD82	ZNF226						PAN2						C9orf173		OR2F2	ZBTB6				DNAJC17	NOV
																			C19orf6				C11orf61				KCNA4	ZNF227						TROAP						NRARP		ZNF786	NEK6				MNS1	ODF1
																			TPGS1				ALG9				KCNC1	ZFP112						TSFM						FAM163B		PRSS37	SDCCAG3				NOP10	TNFRSF11B
																			REEP6				CLMP				KCNJ11	ZNF229						CTDSP2						FLJ40292		SVOPL	NOXA1				MYO5C	OPRK1
																			IZUMO4				PDZD3				KCNQ1	ZNF230						RNF41						TUBBP5		MTPN	USP20				FAM214A	PCM1
																			SCAMP4				C11orf63				KRTAP5-9	SYMPK						GDF11						RNF224		LRGUK	ACTL7B				C15orf24	PDE7A
																			ADAT3				CCDC15				LDHA	MIA						CNPY2						SNORA17		ASB10	ACTL7A				PAK6	PDGFRL
																			ZNF554				TMPRSS5				LDHC	TEAD2						TUBA1B						SNORA43		PRSS58	SLC27A4				DTWD1	ENPP2
																			GRIN3B				PUS3				FADS1	PPFIA3						RAPGEF3						MIR602		RNF32	CNTRL				CASC5	PENK
																			MRPL54				MFRP				FADS3	PLA2G4C						MCRS1						RNF208		TRY6	WDR5				AVEN	PLAG1
																			LRG1				JAM3				LMO1	NAPA						DCTN2						DNLZ		LOC154761	C9orf9				GJD2	PLAT
																			C19orf70				BCO2				LMO2	PGLYRP1						AVIL						LOC100128593		CLEC2L	ADAMTS13				STARD9	PLEC
																			TMIGD2				TMPRSS13				LRP4	ARHGEF1						PTGES3						LOC100129722		C7orf55	C9orf7				VPS18	PNOC
																			TNFAIP8L1				KIRREL3				LRP5	CYTH2						OS9						LOC100130954		LOC154822	SLC2A6				SQRDL	PMP2
																			ZNF57				BUD13				LSP1	ZNF235						ATF7						LOC100131193		TMEM213	AKAP2				ZFP106	POLB
																			JSRP1				TMEM25				LTBP3	NAPSA						BAZ2A						FAM157B		GIMAP8	RPL35				RFX7	POLR2K
																			MOB3A				RPUSD4				CAPRIN1	KLK4						GALNT6						RNU6ATAC		CRYGN	MAN1B1				SPATA5L1	POU5F1B
																			MFSD12				TBRG1				MAP6	DHX34						NXPH4						LOC100289341		ZNF425	DOLK				CHAC1	PPP2CB
																			GIPC3				UBASH3B				MDK	SAE1						GPR182						MIR4292		LOC155060	PTGR1				C15orf29	PPP2R2A
																			NDUFA11				DIXDC1				MEN1	TOMM40						COPZ1						MIR3621		ZNF746	TRIM32				SLTM	PPP3CC
																			C19orf21				GLB1L2				SCGB2A1	RABAC1						R3HDM2						MIR3689A		ATP6V0E2	FNBP1				ATP8B4	PKIA
																			PLK5				ESAM				SCGB2A2	ZNF234						FAIM2						MIR3689B		RBM33	SETX				WDR76	PRKDC
																			C2CD4C				FDXACB1				MAP3K11	PPP1R13L						DDN						LOC100506599		GALNTL5	ZBTB43				TMEM62	PTK2
																			TICAM1				C11orf52				MUC2	CD3EAP						TMEM194A						MIR3689D1		GIMAP7	PMPCA				SEMA6D	PVT1
																			CIRBP-AS1				VPS26B				MUC6	RUVBL2						ESYT1						MIR3689F		ZNF467	ASTN2				SPG11	PEX2
																			ZNRF4				GLB1L3				MYBPC3	KDELR1						TENC1						MIR4669		GIMAP1	FKBP15				ELL3	RAB2A
																			C19orf25				TIRAP				MYO7A	KLK11						KCNH3						MIR4673		LOC202781	KIAA0368				POLR2M	RAD21
																			ATP8B3				C1QTNF5				MYOD1	HNRNPUL1						CBX5						MIR4674		C7orf33	EXOSC2				C15orf48	RP1
																			DIRAS1				PANX3				NAP1L4	CLASRP						ANP32D						MIR3689C		FABP5P3	NCS1				C15orf41	RPL7
																			ZNF555				APOA5				NDUFC2	KPTN						SMUG1						MIR3689D2		UBN2	ANGPTL2				SPPL2A	RPL8
																			PRR22				TMEM45B				NDUFS3	KLK8						PRPF40B						MIR3689E		TAS2R39	NUP188				ZFYVE19	RPL30
																			ANKRD24				PIH1D2				NDUFV1	PNKP						METTL7A						MIR4479		TAS2R40	RABGAP1				CGNL1	RPS20
																			C19orf26				FAM55A				NDUFS8	ATF5						LETMD1								TAS2R41	C9orf5				FRMD5	SDC2
																			CSNK1G2-AS1				FAM55B				NELL1	CARD8						METTL21B								CNPY1	C9orf4				DISP2	SDCBP
																			PLAC2				AMICA1				NUCB2	CYP2G1P						ZNF385A								LOC285889	CIZ1				ULK4P3	SFRP1
																			TMEM146				LAYN				NUMA1	CIC						SNORD59A								FLJ40852	DFNB31				ULK4P1	SFTPC
																			C19orf77				TTC36				NUP98	ZC3H4						GLS2								LOC285965	COBRA1				ATPBD4	ST3GAL1
																			MIR7-3HG				PATE1				OMP	FBXO46						RND1								FAM115C	NELF				C15orf57	SLA
																			ODF3L2				ADAMTS15				SLC22A18	ETHE1						ORMDL2								ZNF775	GPSM1				C15orf23	SLC7A2
																			ADAMTSL5				MPZL3				SLC22A18AS	RPL13A						RACGAP1								LOC285972	DKFZP434A062				BMF	SLC18A1
																			TMPRSS9				C11orf45				OSBP	SYNGR4						SENP1								ATG9B	GAPVD1				SHF	SLC20A2
																			NDUFS7				HYLS1				OVOL1	PRG1						DHH								FLJ40288	PHF19				DUOXA1	SNAI2
																			C19orf35				TMEM218				P2RX3	CBLC						FKBP11								TAS2R60	FBXW2				LDHAL6B	SNTB1
																			HSD11B1L				SLC37A2				P2RY2	NUP62						KRT76								CTAGE6P	OR1J4				CHST14	SPAG1
																			WASH5P				OR8B12				P2RY6	PPP1R15A						CSAD								AGBL3	OR2K2				CASC4	SQLE
																			ONECUT3				OR8G5				PAK1	EML2						BIN2								OR6V1	GBGT1				TGM7	STAR
																			MEX3D				OR10G8				PAX6	KLK5						LIMA1								OR2A12	LHX6				CATSPER2	STC1
																			FLJ45445				OR10G9				PC	PRKD2						IL23A								OR2A1	OR1L3				LEO1	STK3
																			PRSS57				OR10S1				PDE2A	ZNF473						HDAC7								STRA8	OR1L1				PLA2G4E	TACC1
																			VMAC				OR6T1				PDE3B	KLK13						GPR84								KLRG2	OR1J2				TRIM69	TAF2
																			C19orf29-AS1				OR4D5				PGA5	CCDC9						SLC38A2								WDR86	SNORA65				C15orf43	TCEA1
																			MIR7-3				TBCEL				PIK3C2A	IRF2BP1						PRR13								LOC349160	SNORD62A				LOC145663	TCEB1
																			PLIN5				TMEM136				PLCB3	FGF21						KANSL2								GSTK1	SNORD36C				FAM81A	TERF1
																			FAM138F				SPATA19				POLR2G	SNORD35A						SLC38A4								FAM180A	SNORD36B				GCOM1	TG
																			LINGO3				HEPACAM				PPP1CA	SNORD34						SLC48A1								OR2A25	SNORD36A				LOC145783	KLF10
																			ARRDC5				OAF				PPP2R5B	SNORD33						LMBR1L								OR2A5	SNORD24				FLJ27352	TPD52
																			FAM138A				ANKK1				PRCP	SNORD32A						NDUFA4L2								RAB19	TRUB2				LOC145845	TRHR
																			MIR637				RNF214				PRG2	ZNF285						SMAGP								OR2A7	ST6GALNAC4				TMCO5A	TRPS1
																			PLIN4				LOC283143				PRKRIR	SIGLEC7						DIP2B								OR2A20P	NDOR1				ZSCAN29	TSTA3
																			C19orf71				BCL9L				PSMA1	LYPD3						CALCOCO1								LOC401431	TOR1B				TTBK2	TTPA
																			LOC100131094				FOXR1				PSMC3	BBC3						NCKAP5L								OR2A42	TOR2A				CDAN1	UBE2V2
																			LOC100288123				CCDC153				PTH	DKKL1						NEUROD4								MIR153-2	METTL11A				STRC	COL14A1
																			MIR1909				OR8D1				PTPRCAP	SIGLEC9						C12orf10								AKR1B15	PHPT1				DYX1C1	UQCRB
																			MIR1227				OR8D2				PTPRJ	GPR77						C12orf44								CTAGE15P	ANAPC2				CSNK1A1P1	VDAC3
																			MIR3187				OR8B4				PYGM	DHDH						ARHGAP9								OR2A9P	PKN3				OTUD7A	WRN
																			MIR4321				KIRREL3-AS3				RAB3IL1	SLC6A16						IKZF4								OR2A2	DPP7				SPRED1	YWHAZ
																			MIR4747				LOC283174				RAB6A	CYP2S1						SLC26A10								ARHGEF35	SLC2A8				PGBD4	ZNF7
																			MIR4746				LOC283177				MAP4K2	STRN4						SPATS2								GIMAP6	OBP2B				ADAL	ZNF16
																			MIR4745				CCDC84				RAD9A	GLTSCR2						TMEM106C								WEE2	OBP2A				EXD1	FZD3
																							TMEM225				RAG1	GLTSCR1						OBFC2B								MIR490	ST6GALNAC6				FSIP1	TUSC3
																							OR8D4				RAG2	EHD2						RPAP3								ZNF862	2020-12-01				RHOV	UBXN8
																							LOC341056				RAPSN	KLK14						PIP4K2C								LOC645249	MRPS2				C15orf33	KAT6A
																							C11orf34				RARRES3	KLK12						DNAJC22								C7orf73	COQ4				UBR1	PSCA
																							BSX				RBM4	SHANK1						SLC38A1								ACTR3C	CERCAM				PATL2	FZD6
																							OR6X1				RCN1	NOSIP						CSRNP2								MIR595	EGFL7				LPCAT4	NSMAF
																							OR6M1				RELA	HSD17B14						INHBE								LOC728377	PRRX2				PLA2G4F	LY6D
																							OR10G4				DPF2	VRK3						FAM186B								LOC728743	C9orf114				LRRC57	RGS20
																							OR10G7				SNORD15A	PTOV1						WIBG								LOC730441	RAB14				LYSMD2	JRK
																							OR8B3				ROM1	RAB4B						SARNP								LUZP6	C9orf78				C15orf55	TNKS
																							OR8A1				MRPL23	TRPM4						TUBA1C								MIR671	POLE3				WDR72	EIF3H
																							C11orf88				RPL27A	QPCTL						ZC3H10								LOC100124692	FBXW5				HMGN2P46	DGAT1
																							MIR100HG				RPS3	FAM83E						SPRYD3								LOC100128264	RC3H2				SLC24A5	GPAA1
																							PATE2				RPS6KB2	RASIP1						MFSD5								CTAGE4	EPB41L4B				PRTG	ADAM18
																							PATE4				RPS13	TMEM160						C12orf62								LOC100128822	TBC1D13				LOC283663	ADAM9
																							FLJ39051				RRM1	PIH1D1						DNAJC14								LOC100129148	BSPRY				LOC283710	ADAM7
																							SNX19				SAA1	ATP5SL						CCDC65								LOC100130880	C9orf167				FAM98B	RIPK2
																							MIRLET7A2				SAA2	C19orf73						LACRT								LOC100131176	EXD3				PLA2G4D	TNFRSF10D
																							MIR100				SAA3P	PNMAL1						FMNL3								LOC100132707	FAM206A				GLDN	TNFRSF10C
																							MIR125B1				SAA4	TMEM143						CERS5								LOC100134229	STRBP				FMN1	TNFRSF10B
																							MIR34B				SIPA1	KLK15						XRCC6BP1								LOC100134713	C9orf86				MRPL42P5	TNFRSF10A
																							MIR34C				SLC1A2	SMG9						FAM113B								MOXD2P	CDK5RAP2				USP50	FGF17
																							BLID				SLC3A2	IRGC						2020-03-09								ZNF783	LRRC8A				TEX9	GGH
																							LINC00167				SMPD1	CABP5						COQ10A								MIR548F3	INPP5E				C15orf52	WISP1
																							HEPN1				SPI1	SPHK2						KRT71								MIR548I4	NPDC1				TNFAIP8L3	CPNE3
																							CLDN25				SPTBN2	EXOSC5						LARP4								MIR548F4	BARHL1				SHC4	FOXH1
																							LOC649133				TRIM21	MEIS3						MBD6								MIR548T	SH3GLB2				CTXN2	CHRNA6
																							RPL23AP64				SSRP1	CEACAM19						ARHGEF25								MTRNR2L6	REXO4				C15orf53	TRPA1
																							LOC100128239				ST5	SLC17A7						AGAP2								MIR3907	DOLPP1				C15orf54	DOK2
																							LOC100132078				STIM1	CD177						DCD								LOC100505483	KCNT1				DUOXA2	ASH2L
																							PATE3				STX3	RCN3						MUCL1								LOC100506585	ZBTB26				MIR211	MTMR7
																							LOC100288346				STX5	PNMAL2						FAM186A								LOC100507421	DENND1A				GOLGA8B	CCNE2
																							BACE1-AS				ABCC8	PRR12						OR10P1								GIMAP1-GIMAP5	GPR107				EIF2AK4	EBAG9
																							MIR4301				TAF10	PLEKHA4						SDR9C7								MIR4468	SLC46A2				CATSPER2P1	MSC
																							MIR3167				TCN1	MARK4						LRIG3									LINC00474				UNC13C	MFHAS1
																							LOC100499227				TEAD1	SCAF1						RHEBL1									C9orf80				CKMT1A	KCNB2
																							MIR3656				TH	TSKS						C12orf54									PRDM12				SERINC4	RECQL4
																							LOC100507392				THRSP	DMRTC2						ZNF641									CARD9				C15orf62	CYP7B1
																							LOC100526771				TM7SF2	ELSPBP1						OR10AD1									SUSD1				C15orf56	BAG4
																							HSPB2-C11orf52				TNNI2	LIN7B						SP7									DDX31				PHGR1	ENTPD4
																							FXYD6-FXYD2				TNNT3	HIF3A						GTSF1									FAM129B				LOC645212	MTFR1
																							MIR4697				TPH1	ZNF574						OR10A7									MRPL41				HSP90AB4P	LRRC14
																							MIR4493				TRAF6	TRAPPC6A						KRT74									C9orf16				MIR626	TTC35
																							MIR4492				TRPC2	FKRP						ASB8									MAPKAP1				MIR627	RIMS2
																							LOC100652768				TSG101	ZNF576						MYL6B									EHMT1				MIR628	ST18
																											PHLDA2	TBC1D17						KRT72									SVEP1				ANP32AP1	TOX
																											TUB	GEMIN7						BCDIN3D									PTGES2				LOC728758	MTSS1
																											TYR	MYH14						KRT80									AKNA				OIP5-AS1	PTDSS1
																											UCP2	ADCK4						GRASP									MIR600HG				MIR147B	PHYHIP
																											UCP3	FUZ						KRT78									URM1				LOC100129387	RB1CC1
																											SCGB1A1	OPA3						DTX3									ARPC5L				LOC100131089	ZNF623
																											UVRAG	ITPKC						METTL7B									HDHD3				ANKRD63	KIAA0196
																											VEGFB	B9D2						ANO6									AIF1L				LOC100132724	HHLA1
																											BEST1	RSPH6A						ARID2									UCK1				JMJD7	SORBS3
																											WEE1	MED25						STAC3									GARNL3				PLA2G4B	TRIB1
																											WNT11	BCL2L12						OR6C74									HSDL2				ULK4P2	HRSP12
																											WT1	TEX101						OR6C3									NTNG2				LOC100288615	NPM2
																											SF1	GRWD1						LOC255411									PRRC2B				MIR1233-1	DLC1
																											ZFPL1	CCDC8						LOC283332									PPAPDC3				MIR1266	NDRG1
																											ZNF143	ZNF541						LOC283335									ZDHHC12				MIR1282	PGCP
																											ZNF195	SYT3						ZNF740									FAM73B				LOC100306975	SPAG11B
																											ZNF214	AKT1S1						OR6C6									FIBCD1				MIR2116	LYPLA1
																											ZNF215	CNFN						ANKRD52									KIAA1984				MIR1233-2	NCOA2
																											CSRP3	SNORD35B						SLC39A5									SNHG7				MIR4310	ARFGEF1
																											PDHX	C19orf48						SPRYD4									TMEM141				MIR3942	COLEC10
																											FOSL1	CEACAM21						LOC283403									C9orf37				LOC100505648	KHDRBS3
																											PICALM	CCDC97						LOC283404									COL27A1				LOC100507466	DCTN6
																											FZD4	EXOC3L2						TMPRSS12									FAM125B				SERF2-C15ORF63	PNMA2
																											BBOX1	CTU1						KRT6C									WDR34				DYX1C1-CCPG1	ADAM28
																											PPFIBP2	CCDC114						KRT73									SAPCD2				MIR4510	POP1
																											PPFIA1	DKFZp434J0226						C1QL4									C9orf69				MIR4716	AP3M2
																											SLC43A1	ACPT						KRT79									LRSAM1				MIR4713	COPS5
																											DGKZ	CGB5						ANKRD33									UAP1L1				MIR4712	RBPMS
																											CHST1	CGB7						OR6C2									MRRF				TMCO5B	WWP1
																											API5	LRRC4B						OR6C4									RBM18				MYZAP	STMN2
																											MADD	CGB8						H1FNT									ARRDC1					PTP4A3
																											OR7E2P	GNG8						OR8S1									WDR85					ERLIN2
																											OR6A2	EGLN2						AMIGO2									TMEM203					LZTS1
																											DCHS1	FAM71E1						KRT77									KIF12					PROSC
																											EIF3F	PTH2						C12orf68									PALM2					RNF139
																											CTSF	SIGLEC11						OR6C1									SLC25A25					ZHX1
																											EED	CGB1						OR6C75									WDR31					PUF60
																											FADD	CGB2						OR6C76									ZNF618					ZHX2
																											BANF1	LMTK3						OR6C70									ZMYND19					DENND3
																											RPS6KA4	ZNF526						LOC400027									RNF183					XPO7
																											BRSK2	CEACAM20						LOC400043									NACC2					TRIM35
																											AIP	JOSD2						FIGNL2									C9orf116					ZC3H3
																											SYT7	IZUMO2						OR6C65									LCN8					EFR3A
																											SART1	CPT1C						OR6C68									FAM69B					RRS1
																											SLC6A5	ALDH16A1						MIR196A2									PTRH1					SULF1
																											FIBP	NTN5						MIR26A2									PIP5KL1					RHOBTB2
																											MTA2	IRGQ						FLJ12825									OR1L8					ARC
																											UBE2L6	ZNF428						TMEM198B									OR1N2					BOP1
																											SNORD29	PPM1N						OR9K2									OR1N1					DDHD2
																											SNORD31	KLC3						MIR148B									ASB6					KIF13B
																											SNORD30	IGSF23						HIGD1C									SLC34A3					PSD3
																											SNORD28	LYPD4						GLYCAM1									DAB2IP					ZFPM2
																											SNORD27	CCDC155						HNRNPA1P10									CAMSAP1					HEY1
																											SNORD26	DACT3						SNORA2A									C9orf163					TRAM1
																											SNORD25	SIX5						SNORA2B									MAMDC4					LEPROTL1
																											SNORD22	IGFL2						SNORA34									LCN6					SCRIB
																											SLC22A6	ZNF296						SNORD59B									AK8					KIAA0146
																											SLC22A8	DEDD2						MIR615									OR1Q1					SLC39A14
																											NRXN2	ZNF114						HOTAIR									TTLL11					LRRC6
																											LPXN	SPACA4						LOC100130776									TTC16					LY96
																											PEX16	CADM4						LOC100233209									ZNF483					SGK3
																											FADS2	C19orf76						LOC100240734									C9orf84					RAD54B
																											MAPK8IP1	PRR24						LOC100240735									KIAA1958					DCAF13
																											TP53I11	NAPSB						LOC100286844									C9orf96					RNF19A
																											PITPNM1	IL4I1						MIR1228									OLFML2A					GPR124
																											RIN1	C19orf54						MIR1293									QSOX2					KIAA1429
																											MTL5	PRR19						MIR1291									ZNF883					C8orf71
																											MICAL2	TMEM145						LOC100335030									C9orf91					RGS22
																											CTR9	CXCL17						LOC100506844									NAIF1					FBXL6
																											ATG13	LOC284344						BLOC1S1-RDH5									CDC26					PTTG3P
																											SPCS2	ZNF575						MIR4701									LOC253039					FGF20
																											CKAP5	LYPD5						MIR3198-2									PHYHD1					SNORA72
																											ARHGEF17	ZNF283						MIR4698									MORN5					SNORD54
																											GAB2	PPP1R37						LOC100652999									OR1L4					OPLAH
																											TRIM66	NKPD1															TXNDC8					PABPC1
																											FCHSD2	TPRX1															C9orf43					KCNV1
																											FGF19	MAMSTR															LINC00094					STAU2
																											CCS	IZUMO1															CRB2					MTBP
																											RCE1	C19orf63															SCAI					DKK4
																											NAALAD2	MGC45922															C9orf117					EIF2C2
																											NAALADL1	KLK9															LCN12					LSM1
																											KCNE3	SIGLECP3															C9orf142					ADAMDEC1
																											NR1H3	C19orf75															TPRN					BHLHE22
																											IL18BP	MYPOP															LINC00256A					MRPS28
																											DPP3	NANOS2															FAM78A					COMMD5
																											TSPAN32	ZNF404															GPR144					MRPL13
																											TSSC4	ZNF284															QRFP					ATAD2
																											USH1C	C19orf81															OR1J1					ASAP1-IT1
																											KCNK7	ZNF233															OR1B1					MRPL15
																											HIPK3	B3GNT8															GLT6D1					CNOT7
																											PRMT3	IGFL1															SWI5					CPSF1
																											RASGRP2	CEACAM22P															C9orf50					PURG
																											GLYAT	CEACAM16															PNPLA7					LRP12
																											CDK2AP2	BLOC1S3															C9orf169					RRM2B
																											TCIRG1	LOC388553															ENTPD8					CYHR1
																											RTN3	IGFL3															LOC389791					ASAP1
																											MRVI1	LOC390940															IER5L					MTERFD1
																											TRIM22	SIGLEC16															C9orf171					PI15
																											PRG3	FLJ26850															LCN15					FAM135B
																											SPON1	MIR150															C9orf172					ZC2HC1A
																											RBM14	PSG8															LRRC26					PHF20L1
																											CDC42EP2	MIR330															TMEM8C					LACTB2
																											EIF3M	IGFL4															OR1L6					FAM82B
																											NXF1	ASPDH															OR5C1					ZNF706
																											KAT5	KLKP1															OR1K1					GOLGA7
																											IPO7	TMEM91															LCN9					VPS28
																											SSSCA1	PSG10P															FAM102A					ZDHHC2
																											HTATIP2	PHLDB3															C9orf152					FAM203A
																											DRAP1	SEC1															SNX30					KCNK9
																											TRIM3	SNORD23															WDR38					SLC25A37
																											TAF6L	SNORD88A															LOC401557					C8orf55
																											SCGB1D2	SNORD88B															LCNL1					UBR5
																											SCGB1D1	SNORD88C															C9orf139					SCARA3
																											CELF1	MIR642A															FAM166A					FAM49B
																											POLD3	RPL13AP5															SOHLH1					AZIN1
																											OR5I1	CCDC61															ZBTB34					ATP6V1H
																											STARD10	MIR769															MIR126					OTUD6B
																											OR7E14P	SNAR-G1															MIR147A					TMEM66
																											OR7E12P	SNAR-F															MIR181A2					CHRAC1
																											NEU3	SNAR-A1															MIR181B2					SNTG1
																											ME3	SNAR-A2															MIR199B					GDAP1
																											LYVE1	SNAR-A12															MIR219-2					EXOSC4
																											YIF1A	BSPH1															MIR32					PDP1
																											EHD1	SNAR-A3															C9orf106					CNGB3
																											C11orf58	SNAR-A5															LCN10					LY6K
																											STIP1	SNAR-A7															C9orf173					KCTD9
																											CLP1	SNAR-A11															NRARP					ESRP1
																											KCNQ1OT1	SNAR-A9															PALM2-AKAP2					WHSC1L1
																											SF3B2	SNAR-A4															DNAJC25					IMPAD1
																											CCDC85B	SNAR-A6															DNAJC25-GNG10					TMEM70
																											B3GNT1	SNAR-A8															MIR455					PINX1
																											PRSS23	SNAR-A13															NRON					TRMT12
																											PLA2G16	SNAR-A10															FAM163B					OXR1
																											HPS5	SNAR-B2															FLJ40292					WDYHV1
																											PTGDR2	SNAR-C2															TUBBP5					PIWIL2
																											SLCO2B1	SNAR-C4															RNF224					ELP3
																											RRAS2	SNAR-E															C9orf29					THAP1
																											ZP1	SNAR-C5															SNORA17					ARMC1
																											SHANK2	SNAR-B1															SNORA43					INTS10
																											KDM2A	SNAR-C1															SNORD62B					CCDC25
																											SWAP70	SNAR-C3															SNORD90					UBE2W
																											ATG2A	SNAR-D															MIR600					BRF2
																											GANAB	SNAR-G2															MIR601					LAPTM4B
																											FAM168A	SRRM5															MIR602					C8orf39
																											DTX4	C19orf69															RNF208					TMEM55A
																											DENND5A	SNAR-A14															DNLZ					SLC39A4
																											NUP160	LOC100287177															SNORA70C					CHD7
																											FNBP4	LOC100289650															LINC00256B					SYBU
																											RRP8	LOC100379224															LOC100128505					INTS8
																											CLCF1	MIR3191															LOC100128593					INTS9
																											OR52A1	MIR3190															LOC100129034					CSGALNACT1
																											FAM89B	MIR320E															LOC100129722					HR
																											SNHG1	MIR4324															LOC100130954					PAG1
																											ARFIP2	MIR4323															LOC100131193					PBK
																											POLA2	MIR642B															FAM157B					ZNF395
																											RAB38	LOC100505495															RNU6ATAC					DEFB103B
																											FLRT1	LOC100505622															LOC100272217					BIN3
																											MTCH2	LOC100505681															LOC100288842					TEX15
																											FJX1	LOC100505715															LOC100289019					GSDMC
																											C11orf41	LOC100505812															LOC100289341					C8orf44
																											PRDX5	LOC100506012															MIR181A2HG					JPH1
																											ABTB2	LOC100506033															MIR4292					C8orf4
																											BRMS1	LOC100506068															MIR3154					ENY2
																											C11orf20	LOC100507003															MIR2861					CPA6
																											CHRDL2	MIA-RAB4B															MIR3134					SLURP1
																											PAMR1	RAB4B-EGLN2															MIR3621					SLC45A4
																											C11orf51	APOC4-APOC2															MIR3689A					MTUS1
																											ZDHHC5	MIR4749															MIR3911					KIAA1456
																											ATL3	MIR4750															MIR3689B					ZFAT
																											TSKU	MIR4531															LOC100505478					KIAA1967
																											C2CD3	MIR4751															LOC100506100					ZNF250
																											DAK																LOC100506190					PLEKHA2
																											ODZ4																LOC100506599					SH2D4A
																											DKFZP434K028																MIR4668					PRDM14
																											B3GAT3																MIR3689D1					SNX16
																											FBXO3																MIR3689F					NECAB1
																											SERGEF																MIR4669					PDLIM2
																											EHF																MIR4673					SOX17
																											OR5L2																MIR3960					EBF2
																											OR5E1P																MIR4674					FAM160B2
																											PPP1R14B																MIR4478					DEPTOR
																											OR10A3																MIR3689C					PYCRL
																											FXC1																MIR2964A					C8orf33
																											TIMM10																MIR3689D2					ZBTB10
																											MYEOV																MIR4672					LYNX1
																											BSCL2																MIR3689E					MTMR9
																											ELP4																MIR4479					DUSP26
																											CHORDC1																					C8orf51
																											DKK3																					DSCC1
																											RBMXL2																					DERL1
																											RAB30																					CHCHD7
																											PGAP2																					GPR172A
																											PRPF19																					HMBOX1
																											C11orf67																					EFCAB1
																											MACROD1																					PPP1R3B
																											SLC43A3																					PLEKHF2
																											COMMD9																					ZMAT4
																											C11orf21																					ZFAND1
																											PACSIN3																					ZFHX4
																											TRPM5																					GSDMD
																											SAC3D1																					NIPAL2
																											SNX15																					RNF122
																											RHOD																					CSPP1
																											EFEMP2																					BAALC
																											NOX4																					NUDT18
																											UBQLN3																					ZNF696
																											KCNK4																					GRHL2
																											RNF141																					DOCK5
																											UBXN1																					FLJ14107
																											APIP																					VCPIP1
																											TMX2																					ZNF703
																											GAL																					TTI2
																											SUV420H1																					RAB11FIP1
																											HSD17B12																					PREX2
																											IGF2-AS1																					REEP4
																											TMEM216																					ARHGAP39
																											CHCHD8																					ZNF34
																											SLC15A3																					SLC25A32
																											PHF21A																					TM7SF4
																											MS4A4A																					STMN4
																											WT1-AS																					RNF170
																											PPME1																					SLCO5A1
																											CABP2																					SHARPIN
																											C11orf73																					EPPK1
																											TRMT112																					SCRT1
																											TMEM138																					SOX7
																											PCF11																					FAM167A
																											MRPL48																					SLC35G5
																											CYB5R2																					LINC00208
																											RSF1																					C8orf12
																											C11orf24																					CRISPLD1
																											TRIM34																					TRAPPC9
																											TOLLIP																					TM2D2
																											ZDHHC13																					TATDN1
																											WDR74																					NACAP1
																											TRIM44																					NCALD
																											SYTL2																					SGK196
																											MS4A12																					MAF1
																											MRPL16																					UTP23
																											SDHAF2																					GINS4
																											SSH3																					HOOK3
																											TMEM132A																					PPAPDC1B
																											HRASLS2																					MAK16
																											LAMTOR1																					TRIM55
																											USP47																					FUT10
																											VPS37C																					PARP10
																											ANO1																					C8orf76
																											TRIM68																					TIGD5
																											NADSYN1																					NUDCD1
																											FAM86C1																					FAM83A
																											NAT10																					PPP1R16A
																											CCDC87																					FAM86B1
																											PPP6R3																					LRRCC1
																											UEVLD																					TSPYL5
																											RNF121																					DNAJC5B
																											LIN7C																					PSKH2
																											ACER3																					FAM110B
																											SLC35C1																					MED30
																											TCP11L1																					ERI1
																											LGR4																					ZNF251
																											KCNQ1DN																					KIFC2
																											SOX6																					TMEM67
																											CDC42BPG																					LONRF1
																											OTUB1																					CHMP7
																											AMBRA1																					MTDH
																											PACS1																					CHMP4C
																											KBTBD4																					PKHD1L1
																											PARVA																					NAPRT1
																											TTC17																					WDR67
																											TMEM126B																					HPYR1
																											SLC22A11																					RP1L1
																											MMP26																					TP53INP1
																											AKIP1																					TGS1
																											C11orf16																					MFSD3
																											TMEM9B																					MAL2
																											NRIP3																					XKR4
																											ASCL3																					CSMD3
																											GPR137																					RHPN1
																											C11orf30																					FBXO32
																											PRDM11																					C8orf40
																											CABP4																					SLC26A7
																											CHRNA10																					PCMTD1
																											SLC17A6																					CTHRC1
																											TRIM49																					OSR2
																											CD248																					C8orf34
																											CORO1B																					TOP1MT
																											SCYL1																					CLDN23
																											USP35																					ZNF572
																											CARNS1																					GOT1L1
																											SYT13																					FAM92A1
																											LRRC4C																					VPS37A
																											SCUBE2																					C8orf38
																											POLD4																					TMEM68
																											KRTAP5-8																					ABRA
																											PLEKHB1																					LYPD2
																											MS4A7																					NKX2-6
																											ZBED5																					TMEM71
																											CREBZF																					SGCZ
																											CCDC90B																					ADHFE1
																											CCDC81																					UBXN2B
																											ALX4																					PXDNL
																											MRPL17																					AGPAT6
																											FAM111A																					UNC5D
																											ANO3																					LETM2
																											MS4A6A																					DCAF4L2
																											MS4A5																					RALYL
																											KLC2																					HGSNAT
																											TUT1																					DEFB104A
																											MRPL11																					LOC157273
																											TMEM135																					SGK223
																											STK33																					PEBP4
																											KCTD14																					CDCA2
																											C11orf95																					TMEM65
																											LRFN4																					LOC157381
																											AHNAK																					RDH10
																											ALG8																					C8orf56
																											PRRG4																					ANKRD46
																											TMEM223																					ESCO2
																											TMEM109																					FBXO16
																											CCDC86																					LOC157627
																											C11orf48																					FAM84B
																											C11orf49																					C8orf37
																											TRIM48																					VPS13B
																											OR51G1																					SLC7A13
																											OR51B4																					TDH
																											OR51B2																					TMEM74
																											OR52N1																					FAM91A1
																											RIC3																					C8orf48
																											C11orf80																					C8orf45
																											NARS2																					CLVS1
																											E2F8																					NKX6-3
																											ZNF408																					KCNU1
																											NAA40																					C8orf84
																											QSER1																					CNBD1
																											AGBL2																					SLC30A8
																											ZBTB3																					COL22A1
																											CPSF7																					SNX31
																											PRR5L																					TMEM64
																											ASRGL1																					IDO2
																											MOGAT2																					SDR16C5
																											TMEM134																					ADCK5
																											MUS81																					TSNARE1
																											PAAF1																					R3HCC1
																											INTS5																					PRSS55
																											ZFP91																					C8orf74
																											OR8J3																					HTRA4
																											OR51G2																					ADAM32
																											OR51E2																					C8orf47
																											OR4P4																					LGI3
																											OR4C15																					MAPK15
																											OR4A5																					DEFB105A
																											OR4A16																					DEFB106A
																											OR4A15																					DEFB107A
																											OR10W1																					DEFB109P1
																											OR10V2P																					DEFB130
																											MOB2																					ATP6V0D2
																											GDPD5																					NEIL2
																											CLPB																					YTHDF3
																											UNC93B1																					C8orf46
																											SBF2																					LOC254896
																											RAB1B																					REXO1L1
																											KIF18A																					ADAM5P
																											C11orf68																					FLJ10661
																											MS4A8B																					XKR6
																											FERMT3																					NSMCE2
																											TRPT1																					LOC286059
																											RBM4B																					ZNF707
																											FRMD8																					BREA2
																											FAM160A2																					FAM83H
																											RNASEH2C																					LOC286094
																											FAR1																					EFHA2
																											TMEM126A																					ZNF252
																											BTBD10																					TMED10P1
																											EIF1AD																					C8orf77
																											NUDT22																					LOC286114
																											ARFGAP2																					C8orf31
																											SYVN1																					ZFP41
																											DGAT2																					SCARA5
																											ACCS																					LOC286135
																											MS4A14																					RNF5P1
																											SPRYD5																					C8orf83
																											PTPN5																					DPY19L4
																											MICALCL																					FBXO43
																											RELT																					LOC286177
																											LGALS12																					NKAIN3
																											TRIM5																					LOC286184
																											TNKS1BP1																					LOC286186
																											GAL3ST3																					PPP1R42
																											NAV2																					LOC286189
																											ATG16L2																					LOC286190
																											SYT8																					GPIHBP1
																											TSPAN18																					LOC340357
																											CREB3L1																					KLHL38
																											DKFZp761E198																					NRBP2
																											CCDC34																					ZNF517
																											SLC39A13																					KIAA1875
																											DEPDC7																					C8ORFK29
																											SYT12																					RSPO2
																											ACY3																					POTEA
																											INTS4																					SLC10A5
																											GLYATL1																					SPATC1
																											PRKCDBP																					USP17L2
																											CDCA5																					CA13
																											RPLP0P2																					FAM90A25P
																											SAAL1																					LOC389641
																											SLC22A9																					C8orf80
																											SNORD15B																					C8orf86
																											OSBPL5																					FAM150A
																											C1QTNF4																					XKR9
																											PTPMT1																					LOC389676
																											BATF2																					RBM12B
																											SLC22A12																					FLJ43860
																											MRGPRD																					MAFA
																											MRGPRE																					LOC392196
																											MRGPRF																					LOC392232
																											ART5																					GDF6
																											ARAP1																					LOC401463
																											CATSPER1																					C8orf59
																											MRGPRX2																					SAMD12
																											MRGPRX3																					MIR124-1
																											MRGPRX4																					MIR124-2
																											HRASLS5																					MIR30B
																											TRIM78P																					MIR30D
																											TRIM6																					MIR320A
																											OR52E2																					DEFB103A
																											OR52J3																					C8orf82
																											OR51L1																					FER1L6-AS1
																											OR51A7																					FAM90A13
																											OR51S1																					FAM90A7
																											OR51F2																					FAM90A8
																											OR52R1																					FAM90A18
																											C11orf74																					FAM90A9
																											OR4C46																					FAM90A10
																											OR4X2																					FLJ39080
																											OR4B1																					FLJ46284
																											OR52M1																					FLJ42969
																											OR52K2																					C8orf85
																											OR5P2																					LRRC24
																											OR5P3																					C8orf22
																											GYLTL1B																					MIR383
																											TRIM64																					LINC00293
																											CYP2R1																					DEFB107B
																											DBX1																					DEFB104B
																											DNAJC24																					DEFB106B
																											C11orf46																					DEFB105B
																											OR8I2																					C8orf58
																											OR2D3																					LINC00251
																											OR2D2																					SAMD12-AS1
																											OR52W1																					ZFAT-AS1
																											OR56A4																					HAS2-AS1
																											OR56A1																					DEFB135
																											LOC120824																					DEFB136
																											SYT9																					DEFB134
																											LDLRAD3																					ZNF704
																											OR52B4																					C8orf69
																											C11orf40																					C8orf75
																											OR52I2																					MBOAT4
																											OR51E1																					LINC00051
																											XRRA1																					MIR486
																											UBQLNL																					DEFB109P1B
																											MUC15																					SNHG6
																											C11orf94																					SNORD87
																											C11orf84																					C8orf73
																											PLEKHA7																					SCXB
																											SPTY2D1																					LINC00535
																											TMEM86A																					UG0898H09
																											OR10A5																					RAD21-AS1
																											OR2AG1																					FAM90A14
																											DNHD1																					FABP9
																											SLC5A12																					FABP12
																											LDHAL6A																					FAM86B2
																											C11orf42																					SPAG11A
																											GPHA2																					FER1L6
																											B3GNT6																					MIR597
																											METTL15																					MIR598
																											IMMP1L																					MIR599
																											OR56B4																					MIR661
																											ANO5																					LOC727677
																											OR8U1																					HEATR7A
																											OR4C16																					LOC728024
																											OR4C11																					LOC728724
																											OR4S2																					FAM90A19
																											OR4C6																					ZNF705D
																											OR5D14																					OC90
																											OR5L1																					LOC731779
																											OR5D18																					MIR875
																											OR7E5P																					MIR937
																											OR5AS1																					MIR939
																											OR8K5																					LOC100127983
																											OR5T2																					LOC100128126
																											OR8H1																					LOC100128338
																											OR8K3																					LOC100128750
																											OR8J1																					LOC100128993
																											OR5R1																					TCF24
																											OR5M3																					SCXA
																											OR5M8																					LOC100130155
																											OR5M11																					LOC100130231
																											OR5AR1																					CCDC166
																											OR5AK4P																					LOC100130298
																											LRRC55																					LOC100130301
																											SMTNL1																					LRRC69
																											YPEL4																					LOC100130964
																											MED19																					LOC100131726
																											FOLH1B																					ZNF705G
																											MRPL21																					FAM66E
																											TPCN2																					LOC100132396
																											OR6Q1																					LOC100132891
																											OR9I1																					FAM66D
																											OR9Q1																					FAM66A
																											OR9Q2																					SBF1P1
																											OR1S2																					LOC100133267
																											OR1S1																					LOC100133669
																											OR10Q1																					LOC100192378
																											OR5B17																					LOC100287846
																											OR5B21																					LOC100288181
																											GLYATL2																					REXO1L2P
																											MPEG1																					LOC100288748
																											OR5A2																					DEFB4B
																											OR5A1																					MIR1205
																											OR4D6																					MIR1322
																											OR4D11																					MIR1206
																											PATL1																					MIR1207
																											PLAC1L																					MIR1204
																											MS4A15																					MIR548I3
																											VWCE																					MIR1234
																											CYBASC3																					MIR2053
																											PPP1R32																					MIR2052
																											GDPD4																					MIR1208
																											C11orf82																					MIR4287
																											CCDC83																					MIR3148
																											ORAOV1																					MIR4288
																											LRTOMT																					MIR3150A
																											TIGD3																					MIR3151
																											FAM181B																					LOC100499183
																											CCDC89																					LOC100500773
																											LRRN4CL																					MIR3926-2
																											HNRNPUL2																					MIR3622A
																											ALKBH3																					MIR3926-1
																											LOC221122																					MIR3622B
																											MS4A6E																					MIR3150B
																											DEFB108B																					MIR3610
																											PELI3																					LOC100505659
																											LOC254100																					LOC100505676
																											EHBP1L1																					LOC100505718
																											SNX32																					LOC100506990
																											TSGA10IP																					LOC100507117
																											RNF169																					LOC100507156
																											CNIH2																					LOC100507341
																											ZDHHC24																					LOC100507632
																											C11orf86																					LOC100507651
																											NUDT8																					C8orf44-SGK3
																											LOC255512																					ZHX1-C8ORF76
																											OR52B2																					MIR4469
																											OR4C3																					MIR378D2
																											OR4S1																					MIR548O2
																											EML3																					MIR4661
																											TMEM151A																					MIR4663
																											OR51F1																					MIR4472-1
																											SVIP																					MIR4664
																											MRGPRX1																					MIR4660
																											NPAS4																					MIR4471
																											C11orf31																					MIR4470
																											AQP11																					LOC100616530
																											OR51B5																					PCAT1
																											OR10AG1																					LINC00536
																											OR5J2																					FSBP
																											OR4C13
																											OR4C12
																											KRT8P41
																											LOC283104
																											CSNK2A1P
																											OR51V1
																											LOC283116
																											H19
																											C11orf85
																											SLC25A45
																											NEAT1
																											OR9G4
																											LOC283194
																											LINC00301
																											P4HA3
																											PGM2L1
																											KLHL35
																											LOC283214
																											KCTD21
																											CCDC88B
																											TTC9C
																											SLC22A24
																											RCOR2
																											HARBI1
																											LINC00294
																											IGSF22
																											OR10A4
																											OLFML1
																											LOC283299
																											C11orf36
																											NLRP10
																											NLRP14
																											LUZP2
																											LOC338651
																											OR5F1
																											OR5AP2
																											ANKRD13D
																											ANKRD42
																											LOC338739
																											OR52L1
																											OR2AG2
																											OR52B6
																											DCDC1
																											MS4A10
																											OR2AT4
																											OR10A2
																											OVCH2
																											TBX10
																											RTN4RL2
																											GALNTL4
																											B7H6
																											DKFZp779M0652
																											FAM111B
																											TMEM179B
																											TBC1D10C
																											DNAJB13
																											MALAT1
																											ZFP91-CNTF
																											MRGPRG
																											KRTAP5-1
																											KRTAP5-3
																											KRTAP5-4
																											KRTAP5-10
																											SLC22A25
																											FAM99A
																											OR56B1
																											GVINP1
																											INSC
																											FIBIN
																											C11orf96
																											SLC22A10
																											SPDYC
																											LIPT2
																											OR52K1
																											OR52I1
																											OR51D1
																											OR52A5
																											OR51B6
																											OR51M1
																											OR51Q1
																											OR51I1
																											OR51I2
																											OR52D1
																											OR52H1
																											OR52N4
																											OR52N5
																											OR52N2
																											OR52E6
																											OR52E8
																											OR52E4
																											OR56A3
																											OR56A5
																											OR10A6
																											ACCSL
																											OR4X1
																											OR5D13
																											OR5D16
																											OR5W2
																											OR8H2
																											OR8H3
																											OR5T3
																											OR5T1
																											OR8K1
																											OR5M9
																											OR5M10
																											OR5M1
																											OR9G1
																											OR5AK2
																											OR5B2
																											OR5B12
																											OR5AN1
																											OR4D10
																											OR4D9
																											OR10V1
																											LRRC10B
																											GPR152
																											DOC2GP
																											GUCY2E
																											TRIM77P
																											NAV2-AS4
																											HNRNPKP3
																											FAM180B
																											PCNXL3
																											FLJ42102
																											LOC399939
																											LOC399940
																											OR51T1
																											OR51A4
																											OR51A2
																											IFITM10
																											OR4A47
																											OR4C45
																											SCGB1D4
																											MIR129-2
																											MIR130A
																											MIR139
																											MIR192
																											MIR194-2
																											KRTAP5-5
																											KRTAP5-2
																											KRTAP5-6
																											TMEM41B
																											LOC440028
																											DKFZp686K1684
																											LOC440040
																											LOC440041
																											SLC22A20
																											KRTAP5-7
																											KRTAP5-11
																											LOC441601
																											OR5B3
																											MIR326
																											TRIM6-TRIM34
																											CCDC73
																											LOC494141
																											BDNF-AS1
																											MS4A13
																											OR8U8
																											OR9G9
																											MIR483
																											SNORA3
																											TRIM64B
																											TRIM53P
																											TRIM49L2
																											UBTFL1
																											BTBD18
																											PGA3
																											PGA4
																											LOC644656
																											RASSF10
																											FAM86C2P
																											TRIM64C
																											LOC646813
																											LOC650368
																											SNORA23
																											SNORA45
																											SNORA54
																											SNORD67
																											SNORA57
																											SNORD97
																											MIR610
																											MIR611
																											MIR612
																											INS-IGF2
																											MUC5B
																											LOC729013
																											TRIM49L1
																											LOC729799
																											METTL12
																											C11orf83
																											MIR675
																											MIR708
																											LOC100126784
																											LOC100129216
																											MRVI1-AS1
																											LOC100130348
																											LOC100130987
																											C11orf91
																											FAM99B
																											LOC100133315
																											MRPL23-AS1
																											MIR1908
																											MIR1237
																											MIR548K
																											MIR670
																											SNORA70E
																											MIR4300
																											MIR3160-2
																											MIR3160-1
																											MIR3162
																											MIR3165
																											MIR4298
																											MIR4299
																											MTRNR2L8
																											MIR3654
																											MIR3664
																											MIR3680-1
																											LOC100500938
																											LOC100506233
																											LOC100506305
																											LOC100506368
																											LOC100506540
																											DCDC5
																											LOC100507050
																											LOC100507205
																											LOC100507300
																											LOC100507401
																											RBM14-RBM4
																											TMX2-CTNND1
																											SAA2-SAA4
																											ARL2-SNX15
																											NDUFC2-KCTD14
																											HNRNPUL2-BSCL2
																											MIR4486
																											MIR4686
																											MIR4485
																											MIR4489
																											MIR4690
																											MIR3973
																											MIR4688
																											MIR4696
																											MIR4691
																											MIR4692
																											MIR4694
																											MIR1343
																											MIR4687
																											MIR4488
[truncated: 10 more columns]

## Sheet: Ovary_amp_genes.conf_90
cytoband	8q24.21	8p11.21	10q11.21	1q21.1	1p36.13	9q13	12q12	20q11.21	14q11.2	4p11	6p21.32	7q34	3q26.2	15q26.3	20p11.1	22q11.1	15q26.1	1q21.2	6p25.1	2p11.2	3q29	10q23.31	2q21.2	9p11.2	22q11.21	2q24.2	18p11.21	17q11.2	2q11.1	5p15.1	17q24.1	22q11.21	20q13.33	7q21.2	7q36.1	11q25	12q13.13	1q42.2	2p21	12q14.2	1p36.33	3q29	8q21.13	10q26.13
q value	2.3124e-14	6.7004e-11	9.2966e-10	5.7435e-11	2.3407e-07	3.824e-08	8.2114e-07	5.0809e-07	1.0332e-06	1.7643e-06	3.9855e-06	5.0344e-06	3.5448e-06	7.7342e-07	2.9804e-05	7.172e-05	7.492e-06	4.2342e-07	0.0027255	0.0019577	0.0027255	0.0056846	0.0034581	0.0013943	0.0131	0.013776	0.04363	0.045398	0.026739	0.059709	0.062128	0.040273	0.079759	0.093038	0.051511	0.11201	0.096661	0.13432	0.18693	0.15022	0.18062	0.016179	0.11784	0.22009
residual q value	2.3124e-14	8.8038e-11	9.2966e-10	1.3509e-08	2.5201e-07	3.0248e-07	8.8068e-07	9.115e-07	1.0332e-06	1.7643e-06	3.9855e-06	8.9485e-06	1.6624e-05	1.7628e-05	5.5902e-05	0.00011744	0.0001906	0.00067826	0.0027255	0.0037556	0.0048424	0.0056846	0.0061417	0.019211	0.019849	0.021139	0.04363	0.045398	0.059408	0.059709	0.062128	0.062128	0.079759	0.093038	0.10193	0.11201	0.11201	0.13432	0.18693	0.18885	0.19853	0.20199	0.20586	0.22009
wide peak boundaries	chr8:118173731-136645121	chr8:43092953-43094839	chr10:42400260-42597033	chr1:121484600-144854593	chr1:16862822-16916535	chr9:68397167-68410043	chr12:40907398-40931654	chr20:29537046-29595806	chr14:19482255-19866467	chr4:44986924-49151475	chr6:32552367-32605273	chr7:142460213-142470499	chr3:167757651-169417231	chr15:102242029-102531392	chr20:25829436-25848642	chr22:1-16953722	chr15:93421245-93493907	chr1:147121777-148873321	chr6:1-6162058	chr2:89301881-90118564	chr3:196545461-198022430	chr10:89543926-90433918	chr2:133018828-133020452	chr9:43843692-65983238	chr22:18769204-19174756	chr2:153723519-200255210	chr18:14153808-14542978	chr17:29225255-29709448	chr2:92031845-96601152	chr5:16867800-21466125	chr17:57954245-67713549	chr22:20097554-20753718	chr20:50772672-63025520	chr7:90737475-92697237	chr7:151971093-152560445	chr11:126959304-135006516	chr12:53298441-53413424	chr1:233506786-234744249	chr2:37005072-68362288	chr12:64804661-64969513	chr1:1110493-1647752	chr3:184674089-195596906	chr8:52274437-90845929	chr10:102106864-135534747
genes in wide peak	hsa-mir-30d	[HGSNAT]	[LOC441666]	hsa-mir-3118-3	NBPF1	[LOC642236]	[LRRK2]	[FRG1B]	POTEG	CNGA1	HLA-DQA1	PRSS1	hsa-mir-551b	hsa-mir-1302-10	[FAM182B]	POTEH	hsa-mir-3175	GJA5	BPHL	[MIR4436A]	hsa-mir-922	PTEN	[ANKRD30BL]	FAM75A7	GGT3P	hsa-mir-3129	CYP4F35P	EVI2A	MAL	CDH18	hsa-mir-635	hsa-mir-1286	hsa-mir-647	hsa-mir-1285-1	XRCC2	APLP2	EIF4B	KCNK1	hsa-mir-216b	XPOT	CDK11B	hsa-mir-570	hsa-mir-3149	hsa-mir-202
	hsa-mir-1208			hsa-mir-3118-2	MIR3675					GABRA2	HLA-DRB1		MECOM	OR4F4		OR11H1	CHD2	GJA8	SERPINB1		BDH1	LIPF		KGFLP1	GSC2	hsa-mir-1245	POTEC	EVI2B	ZNF2	MYO10	hsa-mir-548d-2	RANBP1	hsa-mir-4326	KRIT1	ACTR3B	ETS1	KRT8	TARBP1	hsa-mir-559	TBK1	DVL1	hsa-mir-3137	hsa-mir-2052	hsa-mir-378c
	hsa-mir-1207			hsa-mir-3118-1						GABRA4			GOLIM4	TARSL2			MIR3175	NBPF14	F13A1		DLG1	RNLS		FAM74A4	PRODH	hsa-mir-561	CXADRP3	NF1	KCNIP3	BASP1	hsa-mir-634	ZNF74	hsa-mir-124-3	CDK6	MLL3	FLI1	KRT18	KIAA1804	ACYP2		SCNN1D	hsa-mir-944	hsa-mir-124-2	hsa-mir-4297
	hsa-mir-1205			PDE4DIP						GABRB1			EGFEM1P	WASH3P			LOC100507217	ACP6	FOXF2		MFI2	ATAD1		FAM27A	SLC25A1	hsa-mir-1258	ANKRD20A5P	OMG	FAHD2A	LOC285696	hsa-mir-4315-2	TRMT2A	hsa-mir-133a-2	CYP51A1	FABP5P3	KCNJ1		SLC35F3	ZFP36L2		TNFRSF4	hsa-mir-28	ASPH	hsa-mir-4296
	hsa-mir-1204			PPIAL4A						GABRG1			MIR551B	OR4F6				GPR89B	FOXC1		PAK2	LIPJ		LOC643648	DGCR6	hsa-mir-3128		ADAP2	MRPS5	LOC401177	hsa-mir-633	ZDHHC8	hsa-mir-3195	PEX1	LOC100128822	KCNJ5		IRF2BP2	CALM2		MMP23B	hsa-mir-1248	CA1	hsa-mir-2110
	hsa-mir-548d-1			LOC375010						TEC				OR4F15				PPIAL4A	GMDS		RPL35A	CFL1P1		FAM74A2	CLTCL1	hsa-mir-1246		TEFM	ZNF514	GUSBP1	APOH	DGCR8	hsa-mir-1257	CDK14		NFRKB		C1orf31	CYP1B1		MMP23A	AHSG	CA2	hsa-mir-4295
	ADCY8			FLJ39739						TXK				FAM138E				NBPF11	IRF4		KIAA0226	KLLN		FAM75A5	DGCR14	hsa-mir-10b		RNF135	LOC90499		CA4	RTN4R	hsa-mir-646	MTERF		OPCML		LOC100506795	EPAS1		TNFRSF18	APOD	CA3	hsa-mir-548e
	ANXA13			NBPF9						CORIN				GPCRLTM7				NBPF15	NQO2		NCBP2			CNTNAP3B	DGCR2	hsa-mir-933		DPRXP4	TRIM43		CACNG1	DGCR6L	hsa-mir-298	FZD1		ST14		MIR4671	EFEMP1		SSU72	BCL6	CA8	hsa-mir-609
	EXT1			PPIAL4G						OCIAD1				DDX11L1				FLJ39739	SERPINB6		PIGZ			FAM27C	TSSK2	ACVR1		MIR4733	TEKT4		CD79B	RIMBP3	hsa-mir-4325	AKAP9		BARX2		MIR4427	FSHR		SDF4	CPN2	CRH	hsa-mir-936
	HAS2			SRGAP2P2						COMMD8				DDX11L9				PPIAL4D	SERPINB9		IQCG				DGCR11	ATP5G3			PROM2		CSH1	LOC150197	ATP5E	ANKIB1		ARHGAP32			MSH6		MXRA8	CRYGS	CYP7A1	hsa-mir-1307
	KCNQ3			PPIAL4B						ATP10D								PPIAL4B	TUBB2A		FYTTD1				DGCR9	CHN1			ACTR3BP2		CSH2	LOC284865	BMP7	GATAD1		ADAMTS8			FOXN2		CPSF3L	DGKG	E2F5	hsa-mir-146b
	MYC			LOC653513						SLAIN2								NBPF24	RIPK1		LRCH3				DGCR5	CHRNA1			LOC442028		CSHL1	LOC388849	CDH4	RBM48		IGSF9B			LHCGR		AURKAIP1	EHHADH	EYA1	hsa-mir-3158-1
	NDUFB9			PPIAL4C						CWH43								GPR89C	PRPF4B		LMLN				DGCR10	COL3A1			TRIM43B		CYB561	TMEM191B	CHRNA4	MGC16142		NCAPD3			EPCAM		MRPL20	EIF4A2	FABP4	hsa-mir-608
	NOV			FAM72D						OCIAD2								NBPF16	CDYL		LOC152217					COL5A2			ANKRD20A8P		ACE	PI4KAP1	COL9A3	FAM133B		ACAD8			MDH1		ATAD3A	ETV5	FABP5	ACADSB
	TNFRSF11B			LOC728855						NFXL1								PDZK1P1	ECI2		SENP5					ATF2					DDX5	LOC729444	CSTF1	LRRD1		B3GAT1			MEIS1		VWA1	FGF12	NPBWR1	ADAM8
	ENPP2			LOC728875						NIPAL1								PPIAL4F	FARS2		LOC220729					DLX1					ERN1	MIR1286	CTSZ	LOC728066		ZBTB44			MSH2		GLTPD1	GP5	HNF4G	ADD3
	POU5F1B			PFN1P2						COX7B2								PPIAL4E	RPP40		ANKRD18DP					DLX2					BPTF		CYP24A1			THYN1			MTIF2		CCNL2	HRG	IL7	ADRA2A
	PVT1			LOC100130000						SLC10A4									FAM50B		FAM157A					DYNC1I2					GH1		EDN3			NTM			OTX1		TAS1R3	HES1	IMPA1	ADRB1
	ST3GAL1			LOC100286793						FRYL									NRN1		MIR922					DPP4					GH2		EEF1A2			PRDM10			PEX13		ATAD3B	IL1RAP	LYN	ARL3
	SLA									ZAR1									EXOC2		MFI2-AS1					FAP					ICAM2		GNAS			TP53AIP1			VIT		ACAP3	KNG1	MMP16	BNIP3
	SNTB1																		WRNIP1		LOC100507086					FRZB					KPNA2		NPBWR2			JAM3			PIGF		UBE2J2	LPP	MOS	CASP7
	SQLE																		DUSP22		MIR4797					GAD1					MAP3K3		KCNQ2			GLB1L2			PPM1B		PUSL1	MUC4	MYBL1	COL17A1
	TAF2																		LYRM4							GALNT3					PECAM1		LAMA5			VPS26B			PRKCE		B3GALT6	OPA1	OPRK1	CTBP2
	TG																		SLC22A23							GCG					PRKAR1A		MC3R			GLB1L3			EIF2AK2		MIB2	PPP1R2	PDE7A	CYP2E1
	COL14A1																		FOXQ1							MSTN					PRKCA		MYT1			TMEM45B			RAB1A		LOC148413	MASP1	PENK	CYP17A1
	WISP1																		HUS1B							GLS					MAP2K6		NTSR1			ADAMTS15			REL		ATAD3C	RFC4	PLAG1	DMBT1
	MTSS1																		C6orf195							GPD2					PSMC5		OPRL1			C11orf45			RPS27A		TTLL10	SNORA63	PMP2	DOCK1
	KIAA0196																		PXDC1							GRB14					PSMD12		PCK1			SPATA19			SRSF7		TMEM240	TRA2B	PKIA	DUSP5
	HHLA1																		MGC39372							HOXD1					RPS6KB1		PFDN4			LOC283174			SIX3		FAM132A	ST6GAL1	PEX2	ECHS1
	TRIB1																		FAM217A							HOXD3					SCN4A		PPP1R3D			LOC283177			SLC1A4		ANKRD65	SST	RAB2A	EMX2
	NDRG1																		LOC285768							HOXD4					SMARCD2		PSMA7			SNX19			SLC3A1		TMEM88B	TP63	RP1	FGF8
	COLEC10																		MYLK4							HOXD8					TBX2		PTK6			LINC00167			SLC8A1		C1orf233	CLDN1	RPL7	FGFR2
	KHDRBS3																		TUBB2B							HOXD9					AXIN2		RPS21			LOC100128239			SOS1		CDK11A	MAP3K13	RPS20	GFRA1
	RNF139																		PSMG4							HOXD10					PPM1D		SRMS			LOC100507392			SPTBN1		SLC35E2B	ADIPOQ	SDCBP	PRLHR
	ZHX1																		DKFZP686I15217							HOXD11					RGS9		AURKA			MIR4697			STRN			TNK2	TCEA1	GPR26
	ZHX2																		C6orf201							HOXD12					SLC16A6		TAF4						UGP2			IGF2BP2	TCEB1	GRK5
	EFR3A																		PPP1R3G							HOXD13					TBX4		TCEA2						VRK2			CLDN16	TERF1	HABP2
	LRRC6																		MIR3691							HSPD1					MRC2		TFAP2C						XPO1			VPS8	TPD52	HMX2
	MTBP																		LOC100507194							HSPE1					HELZ		TPD52L2						MAP4K3			ACAP2	TTPA	TLX1
	MRPL13																		LOC100508120							INPP1					MED13		ZNF217						COX7A2L			FETUB	NSMAF	INPP5A
	ATAD2																		MIR4645							ITGA6					DCAF7		RAE1						NRXN1			DNAJB11	RGS20	ABLIM1
	ASAP1-IT1																									ITGA4					ABCA10		BCAS1						CRIPT			TBCCD1	RIPK2	MGMT
	ASAP1																									ITGAV					ABCA9		STX16						PREPL			LEPREL1	GGH	MKI67
	PHF20L1																									ITGB6					ABCA8		TNFRSF6B						SOCS5			LSG1	CPNE3	MXI1
	FAM49B																									KCNJ3					APPBP2		VAPB						USP34			HRASLS	TRPA1	NDUFB8
	TRMT12																									LRP2					GNA13		OSBPL2						SERTAD2			SENP2	MSC	NFKB2
	WDYHV1																									LY75					TLK2		ARFRP1						ACTR2			RTP4	KCNB2	NRAP
	GSDMC																									MYO1B					POLG2		RGS19						LRPPRC			ATP13A3	CYP7B1	OAT
	ZFAT																									NAB1					DDX42		SYCP2						CEBPZ			ATP13A4	MTFR1	PAX2
	DEPTOR																									NEUROD1					ARSG		TCFL5						C1D			MGC2889	ST18	PITX3
	DSCC1																									NFE2L2					ABCA6		ADRM1						CCT4			TMEM41A	TOX	PNLIP
	DERL1																									NR4A2					ABCA5		OGFR						CDC42EP3			TMEM44	RB1CC1	PNLIPRP1
	TATDN1																									PDE1A					NOL11		DIDO1						B3GNT2			RPL39L	LYPLA1	PNLIPRP2
	C8orf76																									PDK1					TANC2		HRH3						SIX2			LRRC15	NCOA2	HTRA1
	FAM83A																									PLCL1					PITPNC1		SPO11						GPR75			FAM43A	ARFGEF1	PSD
	MED30																									PMS1					CACNG5		PRPF6						GTF2A1L			TMEM207	COPS5	PTPRE
	WDR67																									RBMS1					CACNG4		SS18L1						STON1			RTP1	WWP1	RGS10
	HPYR1																									SCN1A					RNFT1		GTPBP5						CEP68			MB21D2	STMN2	SCD
	MAL2																									SCN2A					TUBD1		GMEB2						PSME4			XXYLT1	RRS1	FBXW4
	FBXO32																									SCN3A					TACO1		SLCO4A1						EHBP1			CCDC50	SULF1	SLC18A2
	ZNF572																									SCN7A					AMZ2		STMN3						RHOQ			PYDC2	HEY1	TAF5
	TMEM71																									SCN9A					FAM20A		SLMO2						HAAO			LIPH	TRAM1	TCF7L2
	TMEM65																									SP3					BCAS3		TH1L						PRKD3			MUC20	LY96	TECTB
	LOC157381																									SSB					WIPI1		C20orf43						QPCT			LOC253573	SGK3	TIAL1
	FAM84B																									SSFA2					TEX2		RTEL1						ERLEC1			UTS2D	C8orf71	UROS
	FAM91A1																									STAT1					CCDC47		SOX18						EML4			C3orf70	PTTG3P	WNT8B
	SLC30A8																									STAT4					INTS2		YTHDF1						LGALSL			TPRG1	SNORD54	XPNPEP1
	NSMCE2																									TFPI					HEATR6		LIME1						WDPCP			LOC339926	STAU2	SHOC2
	LOC286094																									TTN					SMURF2		UCKL1						ASB3			LPP-AS2	BHLHE22	ADAM12
	KLHL38																									WIPF1					LIMD2		C20orf11						VPS54			LOC344887	MRPS28	UTF1
	SAMD12																									SDPR					KCNH6		PCMTD2						DYNC2LI1			RTP2	MRPL15	EIF3A
	MIR30B																									PKP4					BRIP1		C20orf20						BCL11A			OSTN	PI15	GBF1
	MIR30D																									HAT1					USP32		PPP4R1L						ETAA1			ATP13A5	ZC2HC1A	LDB1
	FER1L6-AS1																									AGPS					CEP95		RBM38						HEATR5B			FLJ42393	LACTB2	BTRC
	SAMD12-AS1																									PRKRA					STRADA		ZFP64						AFTPH			FLJ34208	FAM82B	INA
	ZFAT-AS1																									SLC25A12					C17orf72		ARFGAP1						FANCL			SNORD2	ATP6V1H	SMC3
	HAS2-AS1																									ABCB11					FTSJ3		DOK5						SRBD1			SNORA4	GDAP1	NEURL
	FER1L6																									B3GALT1					C17orf64		SLC2A4RG						C2orf56			C3orf65	CNGB3	BUB3
	LOC727677																									STK17B					TCAM1P		PMEPA1						CCDC88A			GMNC	IMPAD1	NOLC1
	LOC728724																									GTF3C3					EFCAB3		CASS4						KCNK12			LOC647323	TMEM70	GSTO1
	OC90																									PPIG					LOC146880		RAB22A						RPL23AP32			SNORA81	ARMC1	BAG3
	LOC100130231																									CIR1					2020-03-10		ZNF512B						RTN4			MIR570	UBE2W	SH3PXD2A
	LOC100131726																									CYTIP					CEP112		COL20A1						PELI1			SDHAP2	CHD7	FAM53B
	MIR1205																									TLK1					AMZ2P1		CDH26						TTC7A			MIR944	PAG1	SLK
	MIR1206																									CD302					C17orf58		SLC17A9						SMEK2			LOC100128023	C8orf44	DCLRE1A
	MIR1207																									TANK					MILR1		LOC63930						MTA3			LOC100131551	JPH1	ACTR1A
	MIR1204																									DHRS9					METTL2A		FAM217B						THADA			LOC100131635	CPA6	SMNDC1
	MIR1208																									CALCRL					NACA2		C20orf195						ATL2			SNAR-I	PRDM14	NPM3
	LOC100507117																									PSMD14					LRRC37A3		PPDPF						ABCG5			MIR1248	SNX16	GLRX3
	ZHX1-C8ORF76																									KBTBD10					C17orf82		BIRC7						ABCG8			LOC100507391	SOX17	DPYSL4
	MIR4663																									UBE2E3					TBC1D3P2		NPEPL1						PAPOLG				ZBTB10	TACC2
	PCAT1																									MTX2					PLEKHM1P		DNAJC5						CAMKMT				CHCHD7	LBX1
																										TBR1					LOC440461		TUBB1						GEMIN6				ZFAND1	MGEA5
																										NCKAP1					LOC645638		ZBP1						FBXO11				ZFHX4	TUBGCP2
																										RAPGEF4					TBC1D3P1-DHX40P1		CABLES2						THUMPD2				CSPP1	PRDX3
																										GALNT5					LOC653653		ZGPAT						FAM161A				VCPIP1	VAX1
																										COBLL1					SCARNA20		PRIC285						KIAA1841				PREX2	ATE1
																										PLA2R1					SNORA76		FAM210B						PNPT1				SLCO5A1	SEC23IP
																										SATB2					SNORD104		PHACTR3						MCFD2				CRISPLD1	RAB11FIP2
																										SF3B1					MIR634		BHLHE23						ATP6V1E2				TRIM55	INPP5F
																										TMEFF2					MIR635		NKAIN4						DHX57				LRRCC1	DUX4
																										GCA					LOC729683		TSHZ2						PKDCC				DNAJC5B	NT5C2
																										MOB4					SNORA38B		C20orf85						HNRPLL				PSKH2	PDCD11
																										GORASP2					MIR548W		ZNF831						CCDC104				FAM110B	SORCS3
																										HIBCH					MIR4315-2		C20orf166						CCDC85A				CHMP4C	PPRC1
																										STK39					MIR4315-1		GATA5						WDR92				TGS1	FAM175B
																										METTL5					LOC100499466		ZBTB46						PPP1R21				XKR4	DPCD
																										OLA1					MIR4737		GCNT7						C2orf73				PCMTD1	SEC31B
																										BAZ2B					MIR4524A		CBLN4						C2orf63				C8orf34	ATRNL1
																										SLC40A1					MIR3064		CTCFL						PLEKHH2				TMEM68	C10orf137
																										PDE11A					MIR5047		SAMD10						GALM				ADHFE1	DUX2
																										GULP1							ABHD16B						TMEM178				UBXN2B	PDCD4
																										FKBP7							LINC00266-1						AHSA2				PXDNL	VENTX
																										ZAK							C20orf151						COMMD1				DCAF4L2	POLL
																										DNAJC10							LOC149773						PUS10				RALYL	KCNIP2
																										ASNSD1							GNAS-AS1						LINC00309				RDH10	CUZD1
																										MFSD6							LSM14B						FAM82A1				SLC7A13	CALY
																										FIGN							APCDD1L						OXER1				C8orf45	CALHM2
																										ZC3H15							C20orf201						KCNG3				CLVS1	CHST15
																										DNAH7							FAM209A						TMEM17				C8orf84	SUFU
																										RPRM							C20orf166-AS1						SPRED2				CNBD1	ACSL5
																										SLC39A10							LINC00176						CCDC75				SDR16C5	ZRANB1
																										SLC4A10							C20orf197						C2orf61				ATP6V0D2	TTC40
																										SPC25							LOC284757						CYP1B1-AS1				YTHDF3	NSMCE4A
																										ERMN							FAM209B						STON1-GTF2A1L				C8orf46	CNNM2
																										HECW2							SUMO1P1						LOC339803				REXO1L1	C10orf26
																										CWC22							MIR1-1						C2orf74				LOC286177	C10orf118
																										G6PC2							MIR124-3						LOC339807				NKAIN3	HIF1AN
																										PCGEM1							MIR133A2						CDKL4				LOC286184	WDR11
																										IFIH1							MIR296						PRORSD1P				LOC286186	FAM178A
																										OSGEPL1							MIR647						LOC375196				PPP1R42	DHX32
																										2020-03-07							HAR1A						LOC388942				LOC286189	PPP2R2D
																										OBFC2A							HAR1B						LOC388946				LOC286190	FAM45B
																										PLEKHA3							UCKL1-AS1						LOC388948				SLC10A5	TDRD1
																										BOLL							MIR298						TSPYL6				CA13	BCCIP
																										SCRN3							MIR941-1						SULT6B1				FAM150A	C10orf2
																										FASTKD1							MIR941-4						LOC400950				XKR9	AS3MT
																										TTC21B							MIR941-2						UNQ6975				LOC392232	GPAM
																										METTL8							MIR941-3						EML6				LOC401463	KIAA1598
																										CYBRD1							LOC100127888						FLJ30838				C8orf59	FAM160B1
																										CSRNP3							DPH3P1						FLJ16341				MIR124-2	SEMA4G
																										PGAP1							LINC00029						LOC400958				FLJ39080	PLEKHA1
																										DCAF17							LOC100144597						MIR216A				LINC00251	FAM204A
																										COQ10B							FLJ16779						MIR217				ZNF704	LHPP
																										KIAA1715							MIR1914						CHAC2				SNHG6	IKZF5
																										CDCA7							MIR1257						LOC644838				SNORD87	ZDHHC6
																										WDR75							MIR4325						MIR559				UG0898H09	CUEDC2
																										C2orf88							MIR4326						LOC728730				FABP9	FBXL15
																										TANC1							MIR3196						LOC728819				FABP12	C10orf76
																										KCNH7							MTRNR2L3						MORN2				LOC100128126	HPS6
																										LOC91149							LOC100505815						SNORA70B				TCF24	TMEM180
																										SESTD1							LOC100506384						MIR216B				LOC100130155	MCMBP
																										ANKRD44							RTEL1-TNFRSF6B						LOC100128590				LOC100130298	C10orf95
																										ZNF804A							SLMO2-ATP5E						LOC100129726				LOC100130301	C10orf81
																										TTC30A							STX16-NPEPL1						LOC100132215				LOC100132891	PDZD7
																										DAPL1							MIR4756						LOC100134259				SBF1P1	OBFC1
																										MARS2							MIR4758						DBIL5P2				LOC100192378	C10orf88
																										ORMDL1							MIR4532						ARHGEF33				REXO1L2P	WDR96
																										GALNT13							MIR4533						GPR75-ASB3				MIR2052	LRRC27
																										OSBPL6							MIR5095						MIR3682				LOC100505659	TRIM8
																										NOSTRIN							LOC100652730						LOC100505876				LOC100505676	KAZALD1
																										DIRC1													MIR4426				LOC100505718	SFXN3
																										NUP35													MIR4434				LOC100507632	ELOVL3
																										XIRP2													MIR4778				LOC100507651	PCGF6
																										RBM45													MIR4432				C8orf44-SGK3	GPR123
																										BBS5													MIR548AD				MIR4470	LZTS2
																										C2orf77																		NKX6-2
																										RFTN2																		MRPL43
																										ACVR1C																		AFAP1L2
																										UBR3																		USMG5
																										CCDC148																		KNDC1
																										MYO3B																		ITPRIP
																										DUSP19																		LINC00263
																										ANKAR																		MTG1
																										TTC30B																		BBIP1
																										ZSWIM2																		FANK1
																										ZNF385B																		SYCE1
																										KLHL23																		SORCS1
																										PPP1R1C																		PRAP1
																										SLC38A11																		ZNF511
																										WDSUB1																		C10orf90
																										UPP2																		BTBD16
																										GPR155																		FAM24A
																										FAM171B																		PSTK
																										HNRNPA3																		MMP21
																										CERS6																		SFXN2
																										METAP1D																		PDZD8
																										CCDC150																		C10orf32
																										CCDC141																		GSTO2
																										LOC285084																		SFR1
																										MLK7-AS1																		CALHM3
																										EVX2																		CTAGE7P
																										LOC375295																		CLRN3
																										CERKL																		PNLIPRP3
																										SP5																		SFXN4
																										LOC401022																		CPXM2
																										FSIP2																		TRUB1
																										C2orf66																		VTI1A
																										MIR10B																		LOC143188
																										LOC440925																		C10orf82
																										PHOSPHO2																		C10orf46
																										DFNB59																		CCDC147
																										LOC554201																		C10orf91
																										MIR561																		PWWP2B
																										MIR933																		EMX2OS
																										LOC100130452																		PPAPDC1A
																										LOC100130691																		PAOX
																										TMEM194B																		FAM24B
																										SP9																		EBF3
																										LOC100144595																		CALHM1
																										MIR1246																		CASC2
																										MIR548N																		TCERG1L
																										MIR1258																		HSPA12A
																										MIR1245A																		C10orf125
																										SNORA70F																		JAKMIP3
																										MIR3128																		STK32C
																										MIR3129																		RBM20
																										MIR3606																		LOC282997
																										LOC100505695																		LOC283038
																										LOC100506124																		LOC283089
																										LOC100506134																		KCNK18
																										LOC100506783																		VWA2
																										LOC100506866																		NANOS1
																										LY75-CD302																		HMX3
																										PHOSPHO2-KLHL23																		NHLRC2
																										HSPE1-MOB4																		C10orf96
																										MIR4437																		FLJ46361
																										MIR1245B																		ENO4
																										MIR4774																		ARMS2
																										MIR4785																		C10orf122
																										MIR4444-1																		LOC387723
																										LOC100861402																		GUCY2GP
																																												NKX1-2
																																												FLJ41350
																																												C10orf120
																																												LOC399815
																																												METTL10
																																												FLJ37035
																																												FOXI2
																																												FLJ46300
																																												LOC399829
																																												SPRNP1
																																												FAM45A
																																												FRG2B
																																												SPRN
																																												MIR146B
																																												MIR202
																																												NPS
																																												LOC619207
																																												SNORA19
																																												FAM196A
																																												RPL13AP6
																																												DUX4L7
																																												DUX4L6
																																												DUX4L5
																																												DUX4L3
																																												MIR608
																																												MIR609
																																												DUX4L2
																																												LOC729020
																																												TLX1NB
																																												MIR936
																																												LOC100169752
																																												LOC100289509
																																												MIR1307
																																												MIR2110
																																												MIR378C
																																												MIR4297
																																												MIR3158-1
																																												MIR4295
																																												MIR3158-2
																																												MIR4296
																																												MIR3941
																																												MIR3663
																																												MIR3944
																																												LOC100505761
																																												LOC100505839
																																												LOC100505933
																																												C10orf32-AS3MT
																																												FAM24B-CUZD1
																																												MIR4680
																																												MIR4483
																																												MIR4682
																																												MIR4482-1
																																												MIR4484
																																												MIR4681

## Sheet: Ovary_del_genes.conf_90
cytoband	17p11.2	11p15.5	7q22.1	16p11.2	8q11.21	4p11	2q21.2	19p13.3	11q12.1	15q11.2	19q13.2	7p22.3	2p11.1	10q11.21	7p11.2	16p13.3	14q32.33	10p11.1	3p25.1	1q21.1	14q11.2	6p11.2	2p25.1	5q21.3	9q13	4q12	22q13.33	1p36.13	12q24.33	19q11	6q21	11p11.2	19p13.2	11q23.3	6q27	19q13.42	15q26.3	2q36.3	1p36.11	9q13	9q34.3	1p36.32	9q13	18q21.2	6p21.32	21q22.3	18q11.2	3p12.3	10q24.32
q value	2.7986e-27	2.1232e-21	1.0109e-12	1.3943e-12	2.6299e-11	8.3809e-16	4.3133e-10	2.6299e-11	1.7428e-10	6.904e-10	9.1862e-08	5.5091e-07	3.4498e-06	4.7257e-08	6.0109e-06	6.7459e-06	1.9318e-05	2.6098e-07	4.2134e-05	0.00011675	0.00013555	0.00017204	0.00020889	3.2456e-05	9.0535e-10	7.6626e-11	0.00073224	1.6227e-06	0.0013837	0.001436	0.0018029	1.5973e-05	4.9952e-06	0.0039886	0.0042963	0.0015597	0.0059229	0.0071106	8.9223e-06	6.8482e-09	0.0093775	0.00041042	1.185e-05	0.015471	0.015149	0.017701	0.020117	0.024359	0.012849
residual q value	5.1856e-27	2.1232e-21	1.0109e-12	1.3943e-12	2.6299e-11	2.648e-11	4.7939e-10	2.1608e-09	1.1655e-08	6.7018e-08	9.1862e-08	5.5091e-07	3.8029e-06	4.7035e-06	6.0109e-06	6.5299e-06	1.982e-05	2.1823e-05	4.2134e-05	0.00011856	0.00013555	0.00019779	0.00020892	0.00041042	0.00061262	0.00069868	0.00072794	0.00091634	0.0013402	0.001436	0.0018641	0.0026584	0.0029307	0.0039886	0.0042932	0.0057529	0.0060928	0.0072701	0.0077545	0.0079535	0.009194	0.014656	0.015471	0.015471	0.016736	0.018105	0.020671	0.024606	0.027638
wide peak boundaries	chr17:21107619-21312743	chr11:976435-1085692	chr7:100479168-100680233	chr16:33038905-33965588	chr8:42405866-48654913	chr4:44720363-54968179	chr2:132880943-133489600	chr19:1-4239072	chr11:51411740-55864847	chr15:1-22900997	chr19:43095652-43901482	chr7:1647885-6026774	chr2:91843778-96012735	chr10:38989899-42975392	chr7:56564378-57196652	chr16:1266318-1306464	chr14:106437081-107349540	chr10:38645301-42965635	chr3:1-27259752	chr1:120611716-143905690	chr14:1-20228997	chr6:56476457-63931380	chr2:1-23975153	chr5:108516630-110448752	chr9:66500521-68427876	chr4:44996797-55097895	chr22:43537073-51304566	chr1:16730309-16946416	chr12:122987493-133851895	chr19:22497974-29567045	chr6:109483336-109762062	chr11:48346682-48512473	chr19:7084527-8652005	chr11:114093309-115050667	chr6:139200382-171115067	chr19:55141239-55441743	chr15:102294464-102531392	chr2:220505005-243199373	chr1:17183488-31186253	chr9:45363885-67020117	chr9:136328658-139311066	chr1:1544092-6530350	chr9:67320950-68735214	chr18:48248556-54821092	chr6:32525647-32605256	chr21:45868805-48129895	chr18:14823296-19194040	chr3:75244886-77644199	chr10:93648906-112258400
genes in wide peak	MAP2K3	MUC6	ACHE	TP53TG3	CEBPD	CNGA1	hsa-mir-663b	hsa-mir-637	OR5I1	hsa-mir-1268	PSG1	hsa-mir-589	MAL	LOC441666	hsa-mir-4283-1	TPSAB1	LINC00226	HSD17B7P2	hsa-mir-3135	hsa-mir-3118-3	OR11H2	hsa-mir-548u	hsa-mir-3125	hsa-mir-548f-3	ANKRD20A1	CNGA1	hsa-mir-3201	NBPF1	hsa-mir-4304	ZNF91	CD164	OR4A47	ELAVL1	NNMT	hsa-mir-1913	FCAR	hsa-mir-1302-10	hsa-mir-3133	hsa-mir-1976	FAM75A7	COL5A1	hsa-mir-4252	ANKRD20A1	DCC	HLA-DRB1	ADARB1	hsa-mir-3156-2	hsa-mir-4273	hsa-mir-609
	C17orf103		MUC12	LOC390705	CHRNB3	GABRA2	GPR39	hsa-mir-4321	OR5L2	hsa-mir-3118-6	PSG2	ACTB	ZNF2		LOC100130849	TPSG1	LINC00221	SEPT7L	hsa-mir-563	hsa-mir-3118-2	POTEG	DST	hsa-mir-4262	MAN2A1	LOC286297	GABRA2	hsa-let-7b	NECAP2	SCARB1	ZNF99	CCDC162P	OR4C45	FCER2	RBM7	hsa-mir-1202	KIR2DL1	OR4F4	hsa-mir-149	hsa-mir-3115	KGFLP1	DBH	hsa-mir-551a	ANKRD20A3	SMAD4		PTTG1IP	ROCK1	hsa-mir-1324	hsa-mir-936
			UFSP1	LINC00273	FNTA	GABRA4	LYPD1	hsa-mir-1909	TRIM48	hsa-mir-3118-4	PSG3	GNA12	MRPS5		MIR4283-2	TPSB2		LOC399744	hsa-mir-3134	hsa-mir-3118-1	OR11H12	PRIM2	hsa-mir-548s	PJA2	AQP7P1	GABRA4	hsa-mir-1249	CROCCP3	EIF2B1	ZNF254			INSR	REXO2	hsa-mir-1273c	KIR2DL3	WASH3P	hsa-mir-4269	hsa-mir-4253	FAM74A4	SARDH	hsa-mir-4251	LOC642236	ME2		COL6A1	GREB1L	LOC401074	hsa-mir-1307
				TP53TG3C	CHRNA6	GABRB1	ANKRD30BL	hsa-mir-3187	OR4P4	NBEAP1	PSG4	LFNG	ZNF514		MIR4283-1			ACTR3BP5	hsa-mir-4270	FCGR1B	OR4Q3	BAG2	hsa-mir-4261	TSLP	ANKRD20A3	GABRB1	ACR	MIR3675	STX2	ZNF492			MYO1F	C11orf71	ACAT2	KIR2DL4	OR4F6	hsa-mir-562	hsa-mir-1256	LOC442421	FCN1	CDK11B	FAM27B	RAB27B		COL6A2	ESCO1	FLJ20518	hsa-mir-146b
				TP53TG3B	KIAA0146	GABRG1	MIR663B	hsa-mir-1302-11	OR4C15	TUBGCP5	PSG5	NUDT1	LOC90499					LOC441666	hsa-mir-885	HIST2H2BA	POTEM	ZNF451	ACP1	SLC25A46	FAM27B	GABRG1	ARSA		GOLGA3	LOC148145			HNRNPM	FAM55D	CCR6	KIR2DS4	OR4F15	hsa-mir-1471	hsa-mir-1290	FAM27A	FCN2	DFFB		TCF4		PRMT2	LOC644669	FAM86DP	hsa-mir-3158-1
					THAP1	SGCB		AES	OR4A16	OR4N4	PSG6	FSCN1	TEKT4						ATP2B2	LOC375010	LOC642426	RAB23	APOB	TMEM232	LOC100133920	SGCB	TSPO		GTF2H3	LOC148189			NDUFA7	FAM55A	ESR1	KIR3DL1	FAM138E	hsa-mir-1244-1	ALPL	LOC643648	LCN1	MEGF6		MBD2		ITGB2	MIR3156-2	ZNF717	hsa-mir-608
					RNF170	TEC		AMH	OR4A15	HERC2P3	PSG7	MAD1L1	PROM2						BTD	FLJ39739		KIAA1586	RHOB	LOC100289673		TEC	MPPED1		MMP17	ZNF98			MAP2K7	FAM55B	FUCA2	KIR3DL2	GPCRLTM7	hsa-mir-4268	C1QA	FAM74A2	PAEP	GABRD		TXNL1		LSS		FRG2C	hsa-mir-1287
					SGK196	TXK		ATP5D	SPRYD5	GOLGA6L1	PSG9	EIF3B	ACTR3BP2						CAV3	PPIAL4G		KHDRBS2	DDX1			TXK	CHKB		POLE	ZNF681			RPS28		GPR31	NCR1	DDX11L1	AGXT	C1QB	FAM75A5	RXRA	GNB1		POLI		PCNT		MIR1324	hsa-mir-607
					HOOK3	CORIN		AZU1	OR4C46	POTEB	PSG11	KIAA0415	LOC442028						DAZL	EMBP1		BEND6	E2F6			CORIN	CPT1B		PXMP2	ZNF675			CCL25		GRM1	LILRB1	DDX11L9	ALPI	C1QC		SNAPC4	PEX10		WDR7		S100B		MIR4273	hsa-mir-3157
					HGSNAT	DCUN1D4		HCN2	OR8I2	LOC348120	PRG1	IQCE	GGT8P						FANCD2	FAM72B		GUSBP4	HPCAL1			DCUN1D4	TYMP		RAN	RPSAP58			SNAPC2		HIVEP2	LILRB4		ALPP	CAPZB		VAV2	PRKCZ		MEX3C		SLC19A1		MIR4444-1	ADD3
					POTEA	CHIC2		BSG	OR4C16	OR4M2	CD177	WIPI2	ANKRD20A8P						FBLN2	LOC100130000			ID2			CHIC2	FBLN1		SFSWAP	LOC440518			STXBP2		IGF2R	LILRP2		ALPPL2	RUNX3		BRD3	RPL22		ELAC1		SUMO3			ARL3
					LINC00293	OCIAD1		CDC34	OR4C11	OR4N3P	LOC284344	SNX8							GRM7	LOC100286793			KCNF1			OCIAD1	PPARA		UBC	ZNF724P			RAB11B		KIF25	KIR3DL3		KIF1A	CDA		LHX3	SKI		CCDC68		UBE2G2			ENTPD1
					LOC100287846	COMMD8		CIRBP	OR4S2	NF1P2	PSG8	FTSJ2							HRH1				KCNS3			COMMD8	MAPK11		ZNF10	ZNF726			CLEC4M		LPA			BOK	CDC42		ADAMTSL2	TP73		MRO		MCM3AP			CHUK
					MIR4469	ATP10D		CNN2	OR4C6	CHEK2P2	PSG10P	CCZ1							IL5RA				MATN3			ATP10D	MAPK12		ZNF26	LOC100101266			TIMM44		MAS1			CHRND	CD52		PPP1R26	MMP23B		STARD6		FTCD			ABCC2
						DANCR		CSNK1G2	OR5D14	LOC646214	LOC100289650	RNF216							IRAK2				MYCN			DANCR	SBF1		ZNF84	LOC100505835			PNPLA6		MAP3K4			CHRNG	RCC1		UBAC1	MMP23A		C18orf54		DIP2A			COL17A1
						SLAIN2		DAPK3	OR5L1	CXADRP2		CHST12							ITPR1				ODC1			SLAIN2	UPK3A		ZNF140				ARHGEF18		MLLT4			COL4A3	CNR2		OLFM1	KCNAB2		C18orf26		POFUT2			COX15
						USP46		CFD	OR5D18	REREP3		RADIL							OGG1				RPS7			USP46	WNT7B		CDK2AP1				CD209		NMBR			COL4A4	DDOST		SDCCAG3	TNFRSF25		BOD1P		PCBP3			CPN1
						RASL11B		ARID3A	OR7E5P	GOLGA6L6		PAPOLB							OXTR				RRM2			RASL11B	CELSR1		ULK1				ANGPTL4		OPRM1			COL6A3	E2F2		WDR5	TNFRSF14		SNORA37		C21orf58			CYP2C19
						CWH43		EEF2	OR5AS1	LOC727924		RBAK							PPARG				SDC1			CWH43	PPP6R2		DENR				2020-03-02		PARK2			DTYMK	ECE1		SLC2A6	PLCH2		LOC100287225		YBEY			CYP2C8
						FIP1L1		EFNA2	OR10AG1	GOLGA8C		FBXL18							RAB5A				SOX11			FIP1L1	ZBED4		HCAR3				CD320		PCMT1			EPHA4	EPB41		GPSM1	CEP104		LOC100505474		TSPEAR			CYP2C9
						LNX1		ELANE	OR5F1	GOLGA8DP		TTYH3							RAF1				ADAM17			LNX1	SCO2		HIP1R				RETN		PDCD2			ACSL3	EPHA8		DKFZP434A062	SLC35E2		MIR4529		COL18A1			CYP2C18
						OCIAD2		GAMT	OR5D13	MIR4509-1		CARD11							RARB				TPO			OCIAD2	PKDREJ		PIWIL1				XAB2		PLAGL1			GBX2	EPHB2		OBP2A	RER1				LRRC3			CYP17A1
						SPATA18		GNA11	OR5D16	MIR4509-2		TNRC18							RPL15				TSSC1			SPATA18	NUP50		NCOR2				MCOLN1		PLG			GPC1	EXTL1		MRPS2	ACOT7				C21orf56			CYP26A1
						NFXL1		GNA15	OR5W2	MIR4509-3		AMZ1							RPL32				VSNL1			NFXL1	RABL2B		KNTC1				CAMSAP3		PSMB1			GPR35	EYA3		KCNT1	ICMT				C21orf67			DNTT
						NIPAL1		GNG7	LOC440041			BRAT1							SATB1				PXDN			NIPAL1	GRAMD4		MPHOSPH9				CERS4		RPS6KA2			HDLBP	FGR		CARD9	CHD5				FAM207A			FGF8
						LOC152578		MKNK2				SDK1							SEC13				KLF11			LOC152578	TTLL12		ZNF268				LRRC8E		SLC22A1			AGFG1	FUCA1		C9orf69	ARHGEF16				C21orf90			GOT1
						SCFD2		GPX4				FOXK1							SETMAR				ASAP2			SCFD2	MLC1		TMED2				FLJ22184		SLC22A3			HTR2B	IFI6		NACC2	WRAP73				MCM3AP-AS1			HELLS
						COX7B2		GZMM				MMD2							SLC6A1				TAF1B			COX7B2	KIAA0930		SNRNP35				PRAM1		SLC22A2			SP110	GALE		C9orf116	HES2				LINC00315			HHEX
						GSX2		MATK				SLC29A4							SLC6A6				ITGB1BP1			GSX2	MAPK8IP2		FZD10				ZNF414		SOD2			INPP5D	SFN		CAMSAP1	PANK4				KRTAP12-2			TLX1
						SLC10A4		GADD45B				RSPH10B							SLC6A11				ROCK2			SLC10A4	PLXNB2		P2RX2				FBN3		T			IRS1	GPR3		QSOX2	AJAP1				KRTAP12-1			HPS1
						FRYL		NFIC				TFAMP1							SYN2				GREB1			FRYL	BRD1		ANKLE2				PEX11G		TBP			KCNJ13	HMGN2		LINC00094	TP73-AS1				KRTAP10-10			IDE
						ZAR1		OAZ1				LOC389458							THRB				LAPTM4A			ZAR1	ARHGAP8		ABCB9				EVI5L		TCP1			NCL	HMGCL		GLT6D1	LRRC47				LINC00162			KIF11
						LRRC66		PALM				ELFN1							TIMP4				RNF144A			LRRC66	TBC1D22A		RIMBP2				TRAPPC5		TCP10			NDUFA10	HSPG2		TMEM8C	PRDM16				COL18A1-AS1			MXI1
						RPL21P44		POLR2E				ZNF815							TOP2B				PDIA6			RPL21P44	SAMM50		ATP6V0A2				PCP2		TCTE3			2020-09-02	HTR1D		LCN9	NADK				KRTAP10-4			NDUFB8
						SNORA26		POLRMT				RNF216P1							NR2C2				MYCNOS			SNORA26	ATXN10		HCAR1				ZNF358		DYNLT1			NEU2	HTR6		LOC401557	MMEL1				KRTAP10-6			NFKB2
						ERVMER34-1		MAP2K2				ZNF890P							UBE2E1				YWHAQ			ERVMER34-1	FAM19A5		GALNT9				C19orf59		THBS2			NPPC	ID3		SOHLH1	MORN1				KRTAP10-7			PAX2
						MIR4449		PRTN3				OCM							UBE2E2				MYT1L			MIR4449	SULT4A1		ARL6IP4				KANK3		UTRN			PAX3	STMN1		FAM163B	ESPN				KRTAP10-9			PDE6C
								PTBP1				MIR589							VHL				LPIN1				RIBC2		SBNO1				CLEC4G		EZR			PDCD1	MFAP2		DNLZ	KIAA1751				KRTAP10-1			PGAM1
								RPS15				RSPH10B2							WNT7A				PUM2				SMC1B		CHFR				C19orf45		VIP			PDE6D	NBL1		LOC100130954	LOC115110				KRTAP10-11			PITX3
								SGTA				RBAK-LOC389458							XPC				NTSR2				PARVB		PITPNM2				LOC388499		EPM2A			SERPINE2	OPRD1		RNU6ATAC	TPRG1L				KRTAP10-2			PSD
								STK11				MIR4648							BRPF1				SH3YL1				NCAPH2		EP400				CTXN1		PEX3			PPP1R7	PAFAH2		MIR3689A	FAM213B				KRTAP10-5			ALDH18A1
								TBXA2R				MIR4655							COLQ				TRIB2				GTSE1		DHX37				CLEC4GP1		RNASET2			PSMD1	PAX7		MIR3689B	ACTRT2				KRTAP10-8			RBP4
								TCF3				MIR4656							CAMK1				GRHL1				MOV10L1		FBRSL1				LOC100128573		STX11			PTMA	PLA2G2A		LOC100506599	MIB2				KRTAP10-3			SCD
								THOP1											BHLHE40				TRAPPC12				FAM118A		DDX55				C19orf79		SYNJ2			SNORD20	PLA2G5		MIR3689D1	CCDC27				KRTAP12-3			SFRP5
								TLE2											KAT2B				NBAS				TTC38		RSRC2				LOC100507567		LATS1			SAG	PPP1R8		MIR3689F	CALML6				KRTAP12-4			FBXW4
								MADCAM1											SH3BP5				CPSF3				C22orf26		AACS				LOC100507588		QKI			CCL20	PTAFR		MIR4669	C1orf86				KRTAP10-12			SLIT1
								SF3A2											VGLL4				SNTG2				MIOX		NOC4L						WTAP			SP100	RAP1GAP		MIR3689C	NPHP4				LOC642852			TAF5
								PPAP2C											EDEM1				ADI1				PRR5		OGFOD2						AKAP12			SPP2	RHCE		MIR3689D2	LOC284661				LINC00163			TLL2
								S1PR4											TBC1D5				ALLC				TRMU		VPS37B						PHACTR2			SCG2	RHD		MIR3689E	C1orf174				SSR4P1			WNT8B
								AP3D1											TATDN2				KIDINS220				PANX2		TCTN2						UST			CUL3	RPA2			TMEM52				LOC100129027			XPNPEP1
								APBA3											SRGAP3				WDR35				PARVG		CCDC92						CITED2			DGKD	RPL11			GPR153				LOC100505746			GBF1
								MED16											IQSEC1				RDH14				CERK		PUS1						PDE10A			PER2	RPS6KA1			HES5							LDB1
								EBI3											NR1D2				C2orf43				EFCAB6		CCDC62						RAB32			LRRFIP1	SDHB			LOC388588							BTRC
								FSTL3											ARPC4				HS1BP3				ALG12		C12orf65						KATNA1			GPR55	SRSF4			RNF207							PKD2L1
								APC2											TADA3				COLEC11				CRELD2		TMEM132C						FGFR1OP			TRIP12	SLC9A1			HES3							BTAF1
								ABCA7											ATG7				SMC6				ADM2		TMEM132B						SCAF8			ECEL1	TAF12			FLJ42875							INA
								HMG20B											CHL1				NOL10				SCUBE1		LOC116437						TAB2			EIF4E2	TCEA3			MIR551A							PDLIM1
								UQCR11											CAND2				FAM49A				TRABD		TMEM132D						SASH1			HDAC4	TCEB3			CDK11A							NEURL
								SBNO2											RFTN1				RSAD2				PNPLA3		SLC15A4						SYNE1			FARP2	SLC30A2			SLC35E2B							LGI1
								ZFR2											NUP210				NT5C1B				SELO		BRI3BP						MTHFD1L			FARSB	LUZP1			LOC728716							NOLC1
								PIP5K1C											PLCL2				KLHL29				HDAC10		FAM101A						IPCEF1			ARL4C	ARID1A			LOC100129534							GSTO1
								HMHA1											ANKRD28				CMPK2				LDOC1L		ZNF664						TIAM2			RAMP1	SNHG3			LOC100133445							SH3PXD2A
								SHC2											CAPN7				MBOAT2				KIAA1644		GLT1D1						C6orf123			NMUR1	NR0B2			LOC100133612							SLK
								TIMM13											MKRN2				TMEM18				SHANK3		PGAM5						FBXO5			STK25	FCN3			TTC34							ZNF518A
								DAZAP1											THUMPD3				OSR1				TUBGCP6		RILPL2						RGS17			COPS8	AKR7A2			MIR4251							FRAT1
								SNORD37											HACL1				TTC32				LOC90834		DNAH10						DLL1			CAPN10	ALDH4A1			MIR4252							ACTR1A
								FGF22											TTLL3				C2orf50				LMF2		GPR133						MRPL18			SP140	EIF4G3			MIR4689							SMNDC1
								TJP3											CNTN6				PQLC3				PHF21B		DDX51						CLDN20			PASK	MAP3K6			MIR4417							NPM3
								ITGB1BP3											LSM3				LOC150622				KLHDC7B		HCAR2						NOX3			ATG4B	C1orf38										SORBS1
								SLC39A3											NKIRAS1				FAM84A				PNPLA5		EP400NL						TFB1M			SH3BP4	CROCC										ERLIN1
								THEG											LINC00312				GDF7				LOC150381		RILPL1						AIG1			KCNE4	ZBTB40										LBX1
								ZBTB7A											LMCD1				CYS1				C22orf40		SETD8						SNX9			NGEF	PTPRU										MGEA5
								FZR1											C3orf32				ATP6V1C2				CN5H6.4		LOC387895						VTA1			SNORD82	CELA3A										CPEB3
								SIRT6											TRNT1				RNASEH1				LOC284933		LOC400084						BRP44L			SNED1	WASF2										NT5C2
								PIAS4											CRBN				FAM150B				RPL23AP82		FLJ37505						HECA			GIGYF2	HNRNPR										PDCD11
								LSM7											C3orf19				IAH1				LOC339685		LOC440117						UNC93A			TRAF3IP1	SRRM1										SORCS3
								MBD3											GHRL				FLJ33534				C22orf34		FLJ31485						MTRF1L			ANO7	CNKSR1										PPRC1
								MIER2											OXSM				LOC339788				CHKB-CPT1B		LOC647589						RMND1			PRLH	GMEB1										RRP12
								PCSK4											ARL8B				LINC00299				LINC00207		SNORA49						PHF10			THAP4	NUDC										TBC1D12
								C19orf24											SETD5				LOC339822				MIRLET7BHG		LOC100128554						C6orf70			ANKMY1	SRSF10										DNMBP
								PLEKHJ1											TMEM40				MSGN1				FLJ46257		LOC100130238						AGPAT4			SCLY	RCAN3										FRAT2
								BTBD2											NGLY1				GEN1				IL17REL		LOC100190940						TULP4			ASB1	PADI2										DPCD
								RNF126											TMEM111				C2orf48				MIRLET7A3		ZNF605						HYMAI			CAB39	LYPLA2										SEC31B
								NCLN											BRK1				LOC386597				MIRLET7B		MIR4304						GPR126			UGT1A10	DNAJC8										TCTN3
								SPPL2B											RAD18				LOC400940				LINC00229		MIR3612						PLEKHG1			UGT1A8	AKR7A3										C10orf12
								WDR18											LRRN1				LINC00487				FAM116B		MIR3908						ARID1B			UGT1A7	KDM1A										ANKRD2
								REXO1											CIDEC				FLJ12334				PIM3		LOC100507055						TMEM181			UGT1A6	WDTC1										CNNM1
								ZNF77											ZFYVE20				FAM110C				ODF3B		LOC100507091						ZBTB2			UGT1A5	KIAA0090										MYOF
								C19orf29											MTMR14				LOC645949				PRR5-ARHGAP8		LOC100507206						C6orf115			UGT1A9	OTUD3										C10orf28
								CELF5											MRPS25				LOC727982				SYCE3		ZNF664-FAM101A						SMOC2			UGT1A4	UBR4										POLL
								TLE6											CRELD1				RAD51AP2				LOC730668								ULBP3			UGT1A1	ATP13A2										BLNK
								LPPR3											TMEM43				LOC730811				LOC100128946								C6orf211			UGT1A3	CELA3B										KCNIP2
								ZNF556											ZNF385D				SNORA80B				LOC100144603								ZDHHC14			PID1	PADI4										EXOSC1
								OR4F17											HDAC11				MIR4261				LOC100271722								ADGB			ATG16L1	TMEM50A										CALHM2
								FAM108A1											TSEN2				MIR3125				MIR1249								FRMD1			USP40	STX12										CUTC
								DOHH											GRIP2				MIR4262				MIR3201								AGPAT4-IT1			HJURP	CLIC4										PLCE1
								KLF16											C3orf20				LOC100505964				MIR3619								C6orf208			HES6	SYF2										SUFU
								DOT1L											JAGN1				LOC100506054				LOC100506714								C6orf97			DOCK10	LDLRAP1										EXOC6
								KISS1R											GHRLOS2				LOC100506274				MIR4763								MYCT1			C2orf83	PLA2G2D										CCNJ
								CREB3L3											IL17RC				LOC100506474				MIR4762								ULBP2			MFF	RNU11										2020-03-05
								LMNB2											EAF1				NT5C1B-RDH14				MIR4535								ULBP1			CXCR7	AHDC1										CNNM2
								RAX2											OXNAD1				MIR4757												LPAL2			RNPEPL1	SMPDL3B										C10orf26
								MUM1											C3orf24				MIR4429												PPP1R14C			WDFY1	LINC00339										CRTAC1
								ATCAY											LRRC3B																SF3B5			NYAP2	PADI1										CEP55
								MIDN											GALNTL2																RSPH3			GAL3ST2	PLA2G2E										CWF19L1
								R3HDM4											KCNH8																TTLL2			RAB17	HP1BP3										PI4K2A
								C19orf6											CHCHD4																FBXO30			COPS7B	ZNF593										HIF1AN
								TPGS1											METTL6																FAM120B			MRPL44	MECR										FAM178A
								REEP6											TAMM41																FNDC1			TRPM8	MRTO4										C10orf2
								IZUMO4											IL17RE																LRP11			MLPH	YTHDF2										TM9SF3
								SCAMP4											SGOL1																LTV1			IQCA1	PADI3										ENTPD7
								ADAT3											PP2D1																SERAC1			FAM124B	WNT4										AS3MT
								ZNF554											EFHB																REPS1			TM4SF20	RNF186										SEMA4G
								GRIN3B											CPNE9																PPIL4			C2orf54	GPN2										AVPI1
								MRPL54											LOC152024																LINC00473			ARMC9	MED18										HPSE2
								ZNF57											FGD5																SYTL3			EFHD1	PQLC2										MMS19
								JSRP1											CIDECP																SFT2D1			SPHKAP	TRNAU1AP										NOC3L
								MOB3A											CNTN4																C6orf72			SLC19A3	AIM1L										CUEDC2
								MFSD12											LOC285326																TAGAP			ILKAP	XKR8										FBXL15
								GIPC3											SUMF1																ADAT2			ITM2C	ARHGEF10L										C10orf76
								C19orf21											RPUSD3																STXBP5			RHBDD1	TMEM57										HPS6
								PLK5											PRRT3																PACRG			ING5	CAMK2N1										TMEM180
								C2CD4C											LOC285370																RAET1E			MGC16025	ASAP3										C10orf95
								CIRBP-AS1											LOC285375																LOC153910			DNER	PNRC2										PDZD7
								C19orf25											DPH3																ZC2HC1B			B3GNT7	PIGV										OBFC1
								ATP8B3											LOC339862																CNKSR3			SP140L	RCC2										UBTD1
								DIRAS1											COL6A4P1																RAET1L			MOGAT1	FAM54B										WDR96
								ZNF555											TPRXL																PNLDC1			AGAP1	C1orf63										TRIM8
								ANKRD24											LHFPL4																LOC154449			TWIST2	PITHD1										KAZALD1
								C19orf26											VENTXP7																TXLNB			DIS3L2	MAN1C1										SFXN3
								CSNK1G2-AS1											LOC401052																DACT2			NEU4	NIPAL3										SLC25A28
								C19orf77											LOC440944																C6orf118			AP1S3	SEPN1										ELOVL3
								ODF3L2											SNORA7A																OSTCP1			SGPP2	KIF17										MARVELD1
								ADAMTSL5											LOC644990																WDR27			SPATA3	GRHL3										PCGF6
								TMPRSS9											MIR563																SHPRH			FBXO36	IL22RA1										LOXL4
								NDUFS7											MIR885																LOC285740			MTERFD2	GPATCH3										ZDHHC16
								C19orf35											EGOT																LOC285796			UBE2F	PLA2G2F										LZTS2
								WASH5P											GHRLOS																PRR18			OTOS	CEP85										LCOR
								ONECUT3											LOC100129480																ZC3H12D			MYEOV2	PINK1										MRPL43
								MEX3D											LOC100132526																NUP43			OR6B3	PHACTR4										PYROXD2
								FLJ45445											LOC100288428																RAET1G			LOC150935	C1orf135										USMG5
								PRSS57											MIR4270																SUMO4			LOC151171	MUL1										ARHGAP19
								C19orf29-AS1											MIR3714																C6orf120			LOC151174	LIN28A										ITPRIP
								FAM138F											FGD5-AS1																SAMD5			CCDC140	FAM110D										LINC00263
								LINGO3											LOC100505696																IYD			SLC16A14	DHDDS										OPALIN
								FAM138A											LOC100507582																DKFZp451B082			LOC151475	ZNF436										HOGA1
								MIR637											ARPC4-TTLL3																TCP10L2			LINC00471	TAS1R2										SORCS1
								C19orf71											MIR4791																LINC00242			LOC151484	ACTL8										PIK3AP1
								LOC100288123											MIR4790																GTF2H5			MSL3P1	SH3BGRL3										MORN4
								MIR1909											MIR548AC																LOC441177			WDR69	SESN2										ZFYVE27
								MIR1227											MIR4792																LOC645434			C2orf57	TMEM222										FRA10AC1
								MIR3187											MIR4442																RAET1K			TIGD1	USP48										SFXN2
								MIR4321																											MLLT4-AS1			LOC200772	NBPF3										C10orf32
								MIR4745																											SNORA20			C2orf72	ZDHHC18										GSTO2
																																			SNORA29			CXXC11	TRIM63										SFR1
																																			LOC729176			DUSP28	SYTL1										CALHM3
																																			LOC729178			ESPNL	IGSF21										C10orf129
																																			TMEM242			ECEL1P2	SNHG12										FGFBP3
																																			LOC729603			LOC348761	C1orf201										NKX2-3
																																			HGC6.3			RBM44	UBXN11										SLC35G1
																																			LOC100128176			AQP12A	ATPIF1										CCDC147
																																			LOC100129518			KLHL30	RAB42										CALHM1
																																			C6orf99			C2orf82	FAM46B										PIPSL
																																			LOC100132735			OR6B2	C1orf172										BLOC1S2
																																			LOC100289495			ASB18	IFFO2										O3FAR1
																																			MIR1913			FLJ43879	MYOM3										CYP26C1
																																			MIR3918			MIR149	KLHDC7A										CC2D2B
																																			MIR3939			DNAJB3	VWA5B1										FLJ41350
																																			MIR3668			LOC643387	UBXN10										GOLGA7B
																																			MIR3692			PRR21	C1orf213										C10orf62
																																			LOC100507489			LOC646736	PDIK1L										MIR146B
																																			LOC100507557			PRSS56	IL28RA										SNORA12
																																			CAHM			AQP12B	FAM43B										MIR608
																																			MIR4466			SNORA75	PAQR7										MIR609
																																			MIR4465			SCARNA6	FAM76A										LOC728558
																																			MIR4644			SCARNA5	AKR7L										LOC729020
																																			LOC100652739			D2HGDH	TMCO4										TLX1NB
																																						LOC728323	ZNF683										MIR936
																																						PP14571	MDS2										C10orf131
																																						LOC100286922	LOC284632										LOC100128054
																																						MIR1471	LOC339505										DNMBP-AS1
																																						MIR1244-1	PADI6										LOC100289509
																																						BOK-AS1	CATSPER4										MIR1287
																																						MIR1244-3	TRNP1										MIR1307
																																						MIR1244-2	CD164L2										MIR3157
																																						MIR4268	PLA2G2C										MIR3158-1
																																						MIR4269	TMEM200B										MIR3158-2
																																						UBE2F-SCLY	SH2D5										LOC100505540
																																						MIR4439	C1orf130										LOC100505761
																																						MIR4777	LDLRAD2										LOC100505839
																																						MIR2467	MINOS1										LOC100505933
																																						MIR4440	LOC644961										MARK2P9
																																						MIR4786	LOC646471										C10orf32-AS3MT
																																						MIR4441	LOC653566										ARHGAP19-SLIT1
																																							SCARNA1										MIR4482-1
																																							SNORA44										MIR4685
																																							SNORA61
																																							SNORA16A
																																							SNORD99
																																							LOC729059
																																							MIR1976
																																							MIR3115
																																							MIR4253
																																							MIR3917
																																							MIR3675
																																							LOC100506730
																																							LOC100506801
																																							LOC100506963
																																							C1orf151-NBL1
																																							MIR4695
																																							MIR4684
																																							MIR378F
																																							RCAN3AS
[truncated: 28 more columns]
