# Supplementary material for: Analysis of matched primary and recurrent BRCA1/2 mutation-associated tumors identifies recurrence-specific drivers
Source: Research Square preprint supplement (doi:10.21203/rs.3.rs-745248/v1), 2021-08-30
Supplement: Supplementary file 14 [file f9eedcd7fbd0340f415283d4.xlsx]

## Sheet: Module1_DownInTumor_Genes
geneSymbol
POM121L7
POM121L4P
POM121L8P
AC008132.13
TRPM6
KLKB1
RBM20
TDRP
F3
RADIL
NAP1L5
TMOD2
CCDC149
WNK4
PRDM5
GSTM3
SLC22A17
TF
NXPE3
CECR2
SEMA6A
ABCC8
SLC4A10
NPY1R
APOD
TFPI
ABLIM3
CACNA1D
AGR2
TOX3
SPINK8
MAEL
FBLN7
SNORD73
OR1L3
MPV17L
GPHN
SLC19A2
EFHD1
GULP1
ARRB1
ARHGEF26
GREB1L
NEDD4
KITLG
GCOM1
AGPAT9
PTPN20B
PTPN20A
PTPN20CP
RP11-363L24.2
UBE2Q2P1
PIWIL4
TUBB2BP1
TCF7L1
ZHX3
PON3
MAPT
AFF3
RHOJ
ANGPT1
TRPC1
CACNA2D1
SVILP1
C5
AKAP7
XXyac-YX155B6.2
HLX
RNF138P1
PHLDB2
KCNJ8
CDH5
MFAP4
CCND2
TOM1L2
IL18R1
GNG11
SRP14
ITM2B
RBP7
EDNRB
SHE
RP11-122A3.2
PDE1C
TCF4
LDB2
ERG
HGF
PPFIA2
DKK3
TMEM47
FLT1
SRPX
NID1
LAMA4
CD248
TBX18
RP11-799N11.1
VEGFC
CDH13
PRRX1
FSTL1
FRMD6
TIMP3
ENPP1
PTPRD
FIBIN
EDNRA
MIR605
ZEB2
CXCL12
RBMS1P1
RP11-212I21.4
LPAR6
TGFBR3
BMPR1APS1
LEPR
SH3D19
ADH1A
NR3C2
SPARCL1
MYH11
SYNPO2
FHL1
PDE8B
PJA2
ECM2
ARHGAP10
TANGO6
MAP7D3
EPB41L2
ZFP90
POLK
LPL
CDR1
CAV2
MITF
CYBRD1
FGF10
AGTR1
TACC1
PLA2R1
ABCA8
ABCA6
ABCA9
ABCA10
STARD9
LAMA2
SNORD114-25
FAT3
AOX1
GPRASP2
GPRASP1
PLN
ZC2HC1A
PTPRM
CNTN4
TPM1
FGF7
ARMCX1
RBPMS
LMOD1
SYTL4
IGFN1
ZDBF2
RNASEL
STOM
EPB41L3
ITGA1
ELTD1
GPR116
RP1-142L7.5
MMRN1
SYNE1
PTPRB
CCL14
MCAM
CD93
GABARAPL1
ENTPD1
COL15A1
ANXA6
PLA2G2A
MEOX2
DPT
ARHGAP24
SHISA6
CITED2
SPTA1
STARD13
KL
EPAS1
STEAP4
NOVA1
ALDH2
TPSB2
TPSAB1
HDC
COL21A1
IL1RL1
CPA3
MS4A2
FRY
EPS8
ITPR1
GATA2
KLF2
HIC1
PLIN1
CFD
KIF26A
DCLK1
SORBS3
FTO
NFIC
ABR
CXorf36
ACVRL1
VSTM4
ARHGEF15
KLF4
GRASP
TAGLN
ACTA2
MYL9
MSRB3
IGFBP7
TIMP2
TGFB1I1
FAM198B
ZFHX4
FILIP1L
LIMA1
CCDC80
ANGPTL2
COLEC12
SFRP4
MAP1A
SLIT3
EHD2
DCHS1
COL14A1
SERPINF1
LRP1
DCN
LRFN5
IGFBP6
ILK
CNN1
SVEP1
ABI3BP
TSHZ3
SLIT2
MYLK
BNC2
NRP1
MEF2C
SLC16A7
ANTXR2
RAB3IL1
ATP8B4
THBD
PMP22
SPRR2B
KRT1
CMTM5
C21orf88
B3GALT5
PPARGC1A
GRIN3A
COL4A4
PPP1R12BP1
PCDH11Y
PCDH11X
SCN1A
SFTPA2
NIM1
KIAA0408
MBP
TACC2
CNNM1
C16orf52
ANKRD18CP
TMPRSS2
CXXC4
PPM1L
MAPRE3
SHC3
FOXC2
USH1C
SLC16A11
RASSF6
NRG2
KLF15
DMTN
RPL12P33
2021-03-02
SESN1
HABP4
DNM1P51
PKP4P1
HNRNPA3P13
RP11-419M24.4
ST13P11
L1TD1
PKIA
NRN1
RP11-266O15.3
GAS2
C16orf96
CAGE1
MARK1
AC004899.3
TDRD10
SDPR
KIAA1456
ETS2
ATOH8
RP11-160E2.16
AC007952.4
CPO
PPP1R1A
HEPACAM
SKOR1
MEP1B
PLCH2
EFCAB5
SYTL3
CCDC28A
CRB1
AC079781.1
WDR93
FAM71D
TTLL2
FOXE1
RP3-339A18.3
AGTR2
OR2H5P
OR2H2
RP11-7G23.4
FAM27C
RP11-12A20.4
FAM27E2
FAM27A
PCDH20
C12orf79
XIRP2
GRIA4
EGF
BX088645.3
TFAP2B
MYBPC1
FAM90A25P
AC105342.1
RP11-481K9.4
TSSC2
NAP1L2
CTC-360J11.4
OR4F3
OR4F29
OR4F16
OR4F28P
OR4F7P
OR4F2P
OR4F8P
OR4F1P
CLRN1
ZNF812
ZNF209P
CTD-3116E22.6
OR4F14P
USH2A
HNRNPA1P6
ZNF402P
RP1-131F15.2
FZD4
CADPS2
CDKL1
CCDC39
RAPGEF4
PLCL1
SLC25A27
FAM86B2
SNX29P1
MTMR7
HHIPL1
RPL21P10
ZNF501
CTD-2501E16.1
FOXN3
CC2D2B
RASA1
CTC-428H11.2
FAM35CP
SLC9C1
AC105020.1
AP000322.54
RP11-527B17.2
RP11-419L20.2
BTF3P2
RP4-717I23.2
RP1-228H13.1
ZNF826P
MUM1L1
RP11-829H16.5
HNRNPA1P76
RPL9P2
MLLT3
AFF1
FAM69A
CTD-2010I16.1
CTD-2265D6.2
LINC00341
HTR1F
NPHP3
FAM120B
TTC21B
THSD1
NOSTRIN
SNRPGP4
ABCA5
MTUS1
BBS2
DHRS12
RPL23AP60
AC138031.1
SLC26A3
RP11-48B14.1
ABHD12B
SULT1C4
ACADL
NAALAD2
MICU3
RP11-89N17.1
LYVE1
TVP23CP2
AC005517.3
PTPRT
NEK10
BTD
CRISP2
ANGPTL5
CES1P2
RHAG
RERGL
PLCZ1
ZNF540
CDO1
CSGALNACT1
RBMS3
CAV1
JAM2
DIXDC1
ABCB5
SLC8A3
MYOM2
ZNF280D
PRRT2
PRMT10
PDE5A
GAB1
FGF2
NEK1
SPG20
NECAB1
PRRG3
PALMD
CACNB2
CCSER2
AKT3
LONRF1
FAM172A
L3MBTL4
CCDC147
AC022596.6
HAND2-AS1
HAND2
PRELP
CEACAM5
TMEFF2
CSMD1
SCN3A
SCN2A
CHST9
OR51E2
ELMOD1
NELL1
GLT1D1
CWH43
SLITRK3
DGKB
SUPT20HL2
SUPT20HL1
MYOCD
FHL5
ZNF699
PNRC1
OR11H7
PHC1P1
PHC1
USP17L23
PAPPA2
COL4A5
PREX2
CC2D2A
ZNF334
RRN3P2
RRN3P1
SAMD4A
CEP112
ARL15
SLC9A9
DPYD
ERAP1
NR3C1
PLCL2
CREBRF
NFATC2
BIN1
VWF
ENPP2
DARC
CLDN5
TGFBR2
CD36
MAF
TXNIP
SEPP1
CTA-134P22.2
DTHD1
COL4A6
LRCH2
AC006355.3
N4BP2L1
LRRK2
ITM2A
IL16
GYPC
CLIC2
MAN1C1
ADRB2
ZNF300P1
HSPA1L
TEX9
PLEKHA5
PLAGL1
TRABD2B
FZD8
LRRC18
CXorf57
OR10A5
OR10A2
LGI4
ABCD2
ATRNL1
CTNNA3
ANK2
SOGA3
MIR497HG
SDK1
COL6A6
TPTEP1
SNORA16B
BX088651.1
RP11-434D2.9
RP1-37N7.3
GATM
ADAM22
JAM3
ARHGAP44
SHROOM4
PSD3
PKD1L1
MIPOL1
SLC16A2
C14orf37
SNRPGP9
HOXA2
SOBP
PDE7B
MAGEE2
FILIP1
SALL1
CCDC176
ZNF423
ADAM3B
RPL36AP40
RP11-294L13.1
RP11-16E18.1
HOXA9
HOXA10
HOXA7
ABCC9
HOXA6
HOXA5
HOXA-AS3
HOXA4
HOXA3
TIE1
SMOC2
APBB1
GCNT4
C16orf45
ARHGAP28
TPO
AVPR1A
INPP4B
FSIP1
SERPINB6
LAMA3
TNNT3
AADACL2
SLC14A2
ART4
ENOX1
C1QTNF1
CDK15
PDE10A
ADAM23
PARK2
NEGR1
PDE1A
ADAMTS5
PDGFRL
GLT8D2
BMP4
FAM21FP
MYH2
MYH1
MYH8
MYH4
MIR1295A
NAP1L3
FMO1
XG
WISP2
GALNT15
MROH9
FMO3
LAYN
AMYP1
CNTN3
AMPH
SNORD114-7
SNORD114-3
SNORD114-2
SNORD113-8
SNORD113-3
MEG8
SNORD113-5
MIR329-1
SNORA70G
SCARNA18
SNORD114-21
SNORD113-1
RTL1
MEG3
MIR370
SNORD114-6
PLK1S1
SNORD114-9
SNORD113-4
SNORD114-20
SNORD114-17
SNORD114-10
AL132709.8
SNORD113-2
SNORD114-4
ZEB1
NEXN
CALD1
SNORD113-9
SSC5D
FLRT2
NRK
LHCGR
SNORD114-23
SNED1
ARHGEF25
ADAMTSL3
ELN
CDKN1A
MRVI1
GLI2
PDLIM4
TRPA1
CLMP
PHLDB1
TRPC6
GUCY1A2
MEDAG
PRKG1
KIAA1462
SRPX2
COL6A2
COL6A1
CACNA1C
GFPT2
PDGFRA
IGFBP4
PTGIS
PODN
SNAI2
BICC1
VGLL3
PTRF
DLC1
CRISPLD2
PDGFRB
FBN1
TGFB3
TRANK1
FAS
CYP1B1
SERPING1
OLFML3
FMOD
PRKD1
FERMT2
TSHZ2
OLFML1
CPED1
TEK
FAT4
UTRN
PROCR
NT5E
ADAMTSL1
NHSL2
PLA2G4A
GUCY1A3
RP11-325E14.5
RP11-296E7.1
S100B
CRYAB
TBC1D4
NFIB
FAM129A
SHC4
PTPRZ1
SYNM
CTD-3080F16.3
SFRP1
SORBS2
RYR3
PROM1
MMP20
RP11-280O24.3
AK3P5
AC022173.2
SHMT1P1
IGKV1OR-3
IGKV1OR-2
RP11-15J10.3
CDH8
ATP13A4
UPP2
CTB-92J24.3
ZCCHC18
SDK2
MUC15
ZFAND5
CTB-50E14.5
RPL7L1P2
OLAH
ALX4
RP11-290L7.3
LHX6
RP11-292B8.1
CNTNAP3B
CNTNAP3
PLD1
RP11-111G23.1
AL953854.2
RP11-203I2.1
RP11-144A16.1
PTGFR
STAC2
SLC26A4
DDX53
ZNF286B
CLEC4F
ARID5A
COLGALT2
ANKRD35
AREGB
AREG
RP11-452D12.1
DYNC1I1
RP1L1
RP11-34P13.7
WNK2
NPM2
EMILIN3
MIR938
MIR604
SVIL
KALRN
TUBE1
EPM2A
ZMAT1
FAM184A
RSPH4A
CAPS2
MAOB
F10
TTLL11
MAMDC2
RP11-513D4.1
KCNJ13
GARNL3
SMTN
MPDZ
PPP1R12B
UNC80
CTC-265F19.1
PRSS48
FAM161B
FAM90A2P
FERMT1
PCDHB18
PCDHB15
ARIH2P1
AC006024.4
RP11-379B18.5
COL28A1
NME9
KBTBD12
MYO15A
CCDC122
AC115115.3
GABBR1
FGF14
TSPYL4
TSPYL6
PKD1L3
RP13-228J13.8
CTA-246H3.11
RDH12
GK3P
RP11-381O7.3
AC129778.2
AQP7P1
AQP7P4
AQP7P3
HLF
RP11-236F9.2
AL445665.1
NALCN
IGKV1OR-1
AC128677.4
ACSM1
AC116050.1
MUC6
RP11-45H22.1
INSRR
POLI
ANO3
ZFP37
BCAS2P2
ZNF596
TMEM220
RP5-1052I5.1
RP11-104O19.2
GLIPR1L1
MRPL50P2
OR1L6
OR1L4
TTC19
AC002553.1
RP11-667K14.8
SNORD93
GPM6B
RP11-182J1.14
DMD
PLEKHH2
DLG2
REV3L
BBS9
AHI1
RP3-509I19.1
ACKR4
AC068587.2
AC068587.1
MIR548I3
PEAK1
GPR17
ADAMTSL4-AS1
ADAMTSL4
RP11-510H23.1
GNAQP1
RP11-1396O13.2
XIST
TSIX
TPTE2
DCHS2
ALS2CR11
ZC3H12B
PDE6C
RP11-93O14.2
AP001468.1
FAM106CP
FAM106A
AC107982.4
LRRC19
CRYBG3
ODF3
FCF1P7
BHLHB9
ZNF484
AC004893.10
RP4-635E18.8
MASP2
SUGT1P3
FAM175A
RPL34P26
SCARNA7
CENPCP1
SUMO2P8
PGM5P2
DSEL
C9orf84
ASB14
RP11-392B6.1
SLC26A5
RP11-89F17.5
SLC25A15P5
PARP4P3
ZNF658B
CTD-2173L22.4
ZNF658
ANKRD20A4
CCDC168
OLFM4
HPSE2
SNTG1
SLC3A1
EYS
RP11-417J8.6
MIR648
RP11-782C8.5
RP11-435B5.3
RP11-782C8.2
RP11-435B5.5
ANKRD20A17P
RP11-146D12.2
CR848007.2
ANKRD20A3
ANKRD20A2
ANKRD20A1
ANKRD20A8P
ANKRD20A7P
PGM5P1
LIPE
PKDREJ
RNF39
AC011242.6
NFIX
CHST3
PRSS12
SORBS1
OGN
GNAL
DTWD1
SPATA7
SCN4B
MAFF
FAM149A
TTC33
RP11-213G2.3
EGFR
NR1D1
ZBTB20
SPTBN1
NDRG2
RGMA
KLHL13
APBA1
SLC1A1
LCA5L
KBTBD3
RPL17P25
CCDC30
CCDC146
RFX3
PTCH1
TMEM133
GRIA3
STOX2
OLFM2
EPHA4
SPATA18
CCT6B
RP11-1055B8.7
IL3RA
CPNE8
ASTN2
SH3BGR
USP6
DZIP1L
GP6
CNTNAP1
ANKRD24
RP5-1163L11.2
GKAP1
DUSP18
RN7SL673P
RN7SL469P
PRICKLE2-AS3
SUCLA2P1
RP3-393E18.1
RP11-269M20.1
OR1B1
RP11-254A17.1
AC092664.1
ST13P4
SEPT10P1
RP11-1018J11.1
PIK3R1
DST
RAB8B
PCSK1
WASF3
AKR1C3
RP11-475I24.1
PRR16
FAM46A
RHOBTB3
HSPD1P11
AKR1C2
AKR1C1
RHOT1P3
ZNF521
SHANK3
PTCHD1
PIK3C2G
VIT
EXOC6B
SETD7
PLCB4
MID2
MGP
SULF2
CALB2
FAM133CP
PRKAR2B
ARHGAP42
CYYR1
MUSK
LINGO3
TINAGL1
P2RY14
PRMT8
PHYHIP
TDGF1
ALOX15
OR2U1P
OR14J1
OR12D3
OR2J4P
OR2J2
OR2J3
OR2J1
TSKS
RP11-133G22.1
RP11-99I9.2
GOLGA6L11P
RP11-589P10.7
NBEAP1
RP5-1092L12.2
FMO6P
HSD3BP4
GLI3
GPC3
CSRP1
GRIN2B
CHADL
SNCAIP
LPHN2
RP11-563J2.2
AF131215.4
RP11-611O2.6
CPM
RNU6-4P
RNU6-36P
RNU6-3P
RNU6-33P
RNU6-9
MRC1L1
MRC1
LPAR1
FMN2
CPE
VIM
DDR2
PID1
PARVA
PRICKLE2
NAV3
NLGN4Y
NLGN4X
ZNF273
ECT2L
RP11-440K22.1
OR7E29P
RP11-344L21.1
CTD-3236F5.1
RP11-97C18.1
HMGN3P1
ZNF962P
ZNF355P
RP11-754I20.3
NKAPL
BIN2P1
RAMP2-AS1
BMX
TIMP4
AQPEP
APOB
GPD1
AQP7P2
RBP4
LEP
TNMD
FIGF
TNN
PTHLH
TCEAL7
SLC7A14
TGM4
LGALS12
CIDEC
TUSC5
ADIPOQ
CIDEA
CD300LG
GPAM
HEPACAM2
GLYAT
GDF10
COL17A1
MAS1L
KLB
OVCH2
OR10AB1P
OR5P3
OR5P2
OR5E1P
OR5P1P
SPHKAP
AL353791.1
HEPN1
RELN
KCNA1
WSCD1
TNFSF18
UNC13C
LIPJ
UTS2B
CCL27
SYT6
SGCZ
IGSF5
DLK1
WIF1
RP11-494M8.1
PRR21
SMARCE1P6
RP11-795H16.2
OR7E7P
KRT39
SMAD5
CDC14A
IGKV1OR10-1
ST6GALNAC3
CNTFR
SLC38A11
ZPBP
GJC2
LRRC17
ASXL3
RP11-114H24.2
CXCL17
GPR42
FFAR3
THSD7B
PDZD4
KCNIP2
VCX3B
FRMD7
ADAMTS19
SLC22A16
PCOLCE2
ADAMTS18
TNS4
FUT6
ITGA10
CX3CL1
PYGO1
FHOD3
AMOTL1
PDGFA
GEM
BACH2
PDZRN3
CNTN1
EFS
WDR35
CCDC158
ZIM2
PEG3
THRA
MAML3
ZNF132
MXI1
FAM150B
CCDC73
LYSMD4
AKAP6
FAM86B1
EGFL8
SLC25A14P1
CYP2U1
RHOT1P2
ANKRD20A11P
RP11-329A14.1
SERHL2
SERHL
AC124890.1
RPA4
CCSER1
HDAC1P2
BBS5
KLHL41
SLC2A2
KDM4E
OSR1
DPYSL2
AQP1
RP11-161M6.2
KIT
RP11-1220K2.2
MIR568
CEACAM8
CAPN6
CES1P1
CES1
ARRDC4
TTYH1
CDH19
MRGPRX3
DCX
OR7C1
HS3ST4
CCDC129
SMOC1
PROX1
SYT14
DNER
LPPR1
GABRA2
CLCA4
C1QTNF9
OR2M5
OR2M3
MORC1
OR5V1
OR2M1P
OR2L13
OR3A3
OR3A2
RORB
TBX22
HCN1
TMPRSS11F
KRT12
GRM1
PLD5
GRIA1
CADM2
SPATA22
PAK7
KCNJ2
BAAT
RP11-216L13.17
ZNF230
PAK3
CYP2F1
ZNF221
ZNF155
PCDHB12
PCDHB11
PCDHB10
PCDHB4
PCDHB17
PCDHB14
PCDHB7
SLITRK6
NPIPB15
TBX3
KRT13
ZNF70
RRP7B
DDI1
SH3BP5
ELMSAN1
SNRNP70
LTBP4
KRTAP5-11
KRTAP4-9
FRG2B
SIGLEC17P
PRDM16
OSBPL5
C15orf59
AC055876.2
TCTEX1D1
RP11-309L24.6
ASIC4
SLC45A1
PCDHGA2
RP1-37M3.8
SLC1A7
NUDT11
RBPMS2
COL25A1
MYLKP1
CTD-2206N4.4
MCC
FREM1
SMAD9
KCNMB1
FRZB
CCDC3
SEMA3D
BMP2
NUMB
BDH2
KDR
CD34
EBF1
PCDH18
GRID1
PAPPA
ARHGAP6
RUNX1T1
FOXP2
ZNF385D
PI15
NRG1
EPHA3
DENND2A
RP11-14N7.2
NOS3
ESAM
HRH2
FAM74A5
FAM74A1
FAM74A2
RGR
TPH2
CYP2C9
ZNF645
MYT1L
RP11-632K20.6
AC026150.6
KRT8P42
CRYM
CALCR
TAC1
DRD1
PTPN5
SOAT2
DHH
GFRA2
SCN4A
OTOGL
ANXA8L2
ANXA8
ANXA8L1
AL603965.1
MUC13
CLNK
RP11-680G10.1
OR2A5
HOXD10
C12orf42
LA16c-366D3.1
AC002398.11
RAB9B
BRSK2
KIAA0319
CHGB
PPP4R4
C14orf105
ENPP3
ARHGEF33
RP11-627G1.1
AGBL4
KRTAP5-1
C2orf71
TRIM9
FAM189A2
HAP1
CACNB4
UPB1
KIF19
VWA8P1
KRT222
TNFRSF10C
ALMS1P
ST3GAL5
APOBEC3H
PPM1K
HNRNPA1P9
PCBP3
DACT3
TBX5
RASL10A
DMRT2
PI16
BX649563.4
TPSD1
CTSG
HOXC8
HOXC6
SRCIN1
MMP16
ANO1
TBX1
NPDC1
PRND
PPIAP25
RPS6KL1
N6AMT2
AC123768.1
COLCA2
APH1B
SLC18A2
MLTK
ADCY1
WHAMMP2
RP11-147L13.7
SLC16A14
NR5A2
PPARG
POM121L1P
OLFM1
CTB-78O21.1
KCNH1
LTBP1
ADCY2
SLC24A3
DHFRL1
CCPG1
TRIM53CP
PRAMEF1
OR10G9
TOPAZ1
OR4K5
KIF2B
U85056.3
OR5T3
AC008132.1
OR5M1
OR4C46
TRIM51CP
OR5M10
RP11-626K17.5
GAGE2B
GAGE12I
GAGE2A
GAGE2D
GAGE2C
TAAR1
GAGE13
OR4M1
AHSP
FLJ45079
UGT1A10
UGT1A1
OR5H1
OR2M2
OR51A4
GAGE1
TRIM64EP
SLC9B1P4
HHLA1
GPR149
TRIM64B
OR5H14
KRT3
HYAL4
FAM9A
CHRNB3
SLC5A7
AL163636.6
RPE65
OR3A4P
UBTFL7
HMGB1P9
KRTAP3-2
RP11-468N14.4
OR10Q2P
RP11-23E10.4
KRTAP10-9
SMYD1
PPIAP14
CTD-3049M7.1
TRIM53AP
TRIM49C
TRIM53BP
RAG2
SLC17A3
MBD3L2
CTB-25J19.1
KRTAP10-5
OR5AS1
AKR1D1
AGXT2
C8A
BTG4
SLC9B1P2
OR6P1
FRG2
XKR3
OR1G1
OR6C70
FAM230A
NPY2R
SHCBP1L
FAM90A18P
FAM90A17P
FAM90A8P
FAM90A9P
C2orf57
PRAMEF2
FAM138D
CXorf64
TMEM212
FAM138E
AC215219.1
TECRL
OR7G3
GPRC6A
CNBD1
UGT2B4
GALNTL6
OR5AK2
HTR2C
CTAGE14P
CSH2
CSH1
KRTAP5-4
KRTAP5-3
HNRNPA1P1
OR10H2
KRTAP10-7
AC091565.1
AC131280.1
AC091304.1
KRTAP6-1
RP11-313I2.10
AC013269.5
TAS1R2
KRTAP12-2
OR4Q3
OR2G2
TCP11X3P
OR8J3
KRTAP19-3
SSXP5
IL9RP4
SLC10A2
OR6Y1
SSX9
IL17F
OR14C36
FAM26D
OR4A5
C8orf22
OR4N1P
OR4K2
UGT3A1
SSX7
KRT76
CYP11B2
OR9G1
OR10A7
AP003062.1
OR2T1
OR10H3
IFNA14
VSTM2A
OR4A16
TMEM132D
RP11-1396O13.13
AFP
DCAF8L1
RP11-707M1.1
OCSTAMP
TGM6
RP11-450I1.2
ATP1B4
RP11-244H18.1
DAO
XAGE1C
XAGE1B
XAGE1A
XAGE1E
XAGE1D
GAGE2E
GAGE12J
TRIM49
MAGEB6P1
OR2T11
WI2-2994D6.1
RP13-221M14.3
TCP10L2
TRIM49B
SLC6A5
KRTAP4-4
NBPF22P
TRIM64DP
OR4D10
OR10AG1
ACTR3BP2
T
RP11-583F24.5
SCN10A
KRTAP10-3
NLRP13
GABRR3
AC140481.2
RP11-72M10.2
UGT2A3
SSTR5
PRAMEF19
PRAMEF18
SSX3
RP5-845O24.3
PRAMEF12
PLSCR5
OR5D16
OR6C2
RP11-434D2.3
CSHL1
OR51A2
GJA10
SSX2B
SSX2
OR52R1
RXFP2
NLRP5
AMBN
MT1B
CUBNP1
RP11-163O19.10
KRTAP19-5
KRTAP9-4
KRT26
BMP15
PDILT
CYLC1
PAGE1
BMP10
TRIM64C
MC2R
TMPRSS11B
MIR519A2
OR6Q1
CYP2A13
CYP1A2
RP11-382F24.2
OR5R1
OR4C3
ANKRD30BP2
FAM47C
RP11-738O11.9
OR10Q1
SSX4B
SSX4
FAM47B
OR5L1
GALNTL5
OR5L2
CCDC63
PRAMEF10
KRTAP4-12
OR4K15
OR6C3
OR4C10P
MMP26
SI
ATXN3L
KRTAP10-10
OR5M9
KRT25
KRTAP13-2
C1orf68
NR1H4
DRD5P2
TAAR6
NR2E1
AF213884.1
TRIM51HP
SLC17A6
DEFB103B
DEFB103A
PPIAP23
OR13C5
OR13C2
OR13C9
OR13C8
TCP11X2
TCP11X1
NXF2B
NXF2
POM121L2
OR2T12
OR2F2
OR2F1
IRS4
GUCY2F
OR4N4
OR4N3P
GNAT3
SPATA31A5
SPATA31A3
SPATA31A4
SPATA31A7
SPATA31A2
SPATA31A1
SPATA31A6
TRPM1
KLHL33
ZNF705G
REXO1L3P
REXO1L1
REXO1L2P
REXO1L8P
MUC17
CLCA1
RFPL4AL1
RFPL4A
RP11-150O12.3
MAGEB10
OR7E15P
KRTAP10-8
BRINP3
MUC7
SLITRK1
GPR128
UNC5D
EPHA5
ZNF804B
DACH2
PPP1R2P9
DYTN
ISL1
OR2H1
OR12D2
OR2L3
OR7A1P
GH2
SLC17A8
RP11-93O17.2
RP11-536C10.11
POTEB2
POTEB
POTED
SLC7A3
HSPB3
MAGEC1
MAS1
ITLN1
BMP3
FAM47A
OR4N2
FGA
OR8H2
OR10H4
KRTAP16-1
OR10G3
KRTAP20-1
LCE1A
RP11-763B22.7
GNAT1
PRAMEF14
PRAMEF13
OR2T27
SEMG1
AC138749.1
AC097374.2
RFPL4B
KRTAP9-9
KRTAP9-2
FAM9B
AC011718.3
CFC1B
CFC1
XX-FW84067D5.2
RP11-219C24.6
PRAMEF21
PRAMEF20
OR4C5
PRAMEF17
PRAMEF16
OR4D11
SEL1L2
IFNA17
VN1R2
PPP1R3A
AC005255.5
OR10K1
MC3R
TRIM49D2P
TRIM49D1
NLRP8
ACSM2B
CDH9
UGT2B28
FAM74A6
FAM74A4
OR10G8
FAM74A3
DUX4L19
DUX4L18
DUX4L17
DUX4L16
DUX4L9
REXO1L11P
REXO1L10P
REXO1L9P
PRAMEF5
PRAMEF26
PRAMEF6
PRAMEF9
PRAMEF15
PRAMEF4
PRAMEF11
PRAMEF25
RP11-647F2.2
FBXO40
OR2T5
OR2T29
HTR1A
FSCB
OR6T1
OR1D3P
OR1A1
RP4-610C12.2
OR2W5
OR2G3
C18orf63
AC005255.6
SPPL2C
IYD
DUX4L12
DUX4L11
DUX4L13
MYL1
SLC17A4
ANKRD26P1
RP11-363G10.2
RP11-114H20.1
ADAM18
TGIF2LX
PRAMEF22
KRTAP9-8
NEUROD4
SSX5
PRAMEF3
TRIM51GP
TECTB
GRXCR1
SLC32A1
KRT28
ADAM6
TBC1D3P4
F9
CABS1
NOX3
OR5D18
OR4K11P
ACSM2A
SMCO1
C1orf94
AFM
IGHV1OR15-9
DPPA2P2
OR2T10
GRXCR2
SLC9B1P3
DCAF8L2
AC007679.1
RP11-129B22.1
ASMT
OR4M2
HNRNPA1P13
TRIM48
OR10J1
USP29
OR2T4
IFNA16
OR7E16P
STATH
SPATS1
CSF3
OR7E109P
AP005901.1
PAX4
OR5H5P
LCE2B
EVX2
TMEM225
RP11-169D4.1
KRT27
ADAD1
SERPINB11
RP11-754I20.1
IGHV1OR21-1
XX-FW84067D5.1
PRAMEF7
PRAMEF8
TRIM51FP
CFHR2
CFHR5
OR7E5P
MRGPRX2
GALR1
RP11-728C8.1
POTEH-AS1
G6PC
F13B
TMPRSS7
UBTFL5
PDHA2
OR5B12
NLRP4
RPSAP1
DEFB105B
DEFB105A
DNTT
KIR2DS4
TRIM55
HNF4A
OPN1MW2
OPN1MW
OPN1LW
RPTN
AL137798.1
C10orf71
RP11-1118M6.1
AC084121.16
TRIM51JP
NBPF18P
OR11H6
OR11H4
OR11H2
OR11H1
OR11H12
OR4F5
OR4F17
OR4F4
KRT20
FEZF1
CREB3L3
APOA4
POTEA
KRT74
CRYAA
CLDN19
CLCN1
CATSPER4
NAT2
CT62
UGT2B15
AC104634.2
FAM177B
CLEC9A
OR5B21
ATP13A4-AS1
MDS2
CLEC4M
TAC3
PROKR2
ZNF734P
ZNF733P
ZNF479
POM121L3P
ZNF679
ZNF716
RP11-561N12.2
TPTE
OR8B12
OR8A1
OR8G5
OR8G1
[truncated: 2,716 more rows]

## Sheet: Module1_DownInTumor_GO
query	significant	p_value	term_size	query_size	intersection_size	precision	recall	term_id	source	term_name	effective_domain_size
query_1	TRUE	0.0113885	8	345	6	0.0173913	0.75	CORUM:6163	CORUM	BBSome	3624
query_1	TRUE	2.97012e-73	2327	2716	673	0.247791	0.289214	GO:0003008	GO:BP	system process	18092
query_1	TRUE	3.43318e-59	8065	2716	1611	0.593152	0.199752	GO:0032501	GO:BP	multicellular organismal process	18092
query_1	TRUE	2.45499e-48	1465	2716	437	0.160898	0.298294	GO:0050877	GO:BP	nervous system process	18092
query_1	TRUE	1.93523e-46	396	2716	182	0.0670103	0.459596	GO:0050911	GO:BP	detection of chemical stimulus involved in sensory perception of smell	18092
query_1	TRUE	6.34041e-44	424	2716	186	0.0684831	0.438679	GO:0007608	GO:BP	sensory perception of smell	18092
query_1	TRUE	1.06227e-43	512	2716	209	0.0769514	0.408203	GO:0050906	GO:BP	detection of stimulus involved in sensory perception	18092
query_1	TRUE	6.50659e-43	970	2716	317	0.116716	0.326804	GO:0007600	GO:BP	sensory perception	18092
query_1	TRUE	2.32868e-42	445	2716	189	0.0695876	0.424719	GO:0050907	GO:BP	detection of chemical stimulus involved in sensory perception	18092
query_1	TRUE	4.66008e-40	482	2716	195	0.0717968	0.404564	GO:0009593	GO:BP	detection of chemical stimulus	18092
query_1	TRUE	9.83854e-40	496	2716	198	0.0729013	0.399194	GO:0007606	GO:BP	sensory perception of chemical stimulus	18092
query_1	TRUE	1.29045e-36	687	2716	239	0.0879971	0.347889	GO:0051606	GO:BP	detection of stimulus	18092
query_1	TRUE	1.40412e-34	1361	2716	380	0.139912	0.279206	GO:0007186	GO:BP	G protein-coupled receptor signaling pathway	18092
query_1	TRUE	3.0104e-21	4834	2716	945	0.347938	0.19549	GO:0042221	GO:BP	response to chemical	18092
query_1	TRUE	1.10276e-18	6745	2716	1235	0.454713	0.183099	GO:0032502	GO:BP	developmental process	18092
query_1	TRUE	5.89534e-18	6210	2716	1147	0.422312	0.184702	GO:0048856	GO:BP	anatomical structure development	18092
query_1	TRUE	8.63133e-18	6864	2716	1248	0.459499	0.181818	GO:0023052	GO:BP	signaling	18092
query_1	TRUE	3.36885e-17	4440	2716	859	0.316274	0.193468	GO:0030154	GO:BP	cell differentiation	18092
query_1	TRUE	3.37321e-17	6882	2716	1247	0.459131	0.181197	GO:0007154	GO:BP	cell communication	18092
query_1	TRUE	1.27933e-16	5718	2716	1061	0.390648	0.185554	GO:0007275	GO:BP	multicellular organism development	18092
query_1	TRUE	3.1296e-16	4518	2716	866	0.318851	0.191678	GO:0048869	GO:BP	cellular developmental process	18092
query_1	TRUE	3.49716e-16	646	2716	183	0.0673785	0.283282	GO:0003013	GO:BP	circulatory system process	18092
query_1	TRUE	4.37137e-16	562	2716	165	0.0607511	0.293594	GO:0008015	GO:BP	blood circulation	18092
query_1	TRUE	6.55976e-16	5151	2716	966	0.35567	0.187536	GO:0048731	GO:BP	system development	18092
query_1	TRUE	2.35155e-15	2865	2716	586	0.215758	0.204538	GO:0009653	GO:BP	anatomical structure morphogenesis	18092
query_1	TRUE	3.00833e-14	477	2716	142	0.0522828	0.297694	GO:0003012	GO:BP	muscle system process	18092
query_1	TRUE	3.00833e-14	368	2716	118	0.0434462	0.320652	GO:0006936	GO:BP	muscle contraction	18092
query_1	TRUE	6.95342e-14	4194	2716	799	0.294183	0.19051	GO:0065008	GO:BP	regulation of biological quality	18092
query_1	TRUE	3.78654e-13	313	2716	103	0.0379234	0.329073	GO:0072001	GO:BP	renal system development	18092
query_1	TRUE	3.28759e-12	625	2716	167	0.0614875	0.2672	GO:0007610	GO:BP	behavior	18092
query_1	TRUE	3.8037e-12	3770	2716	719	0.264728	0.190716	GO:0048513	GO:BP	animal organ development	18092
query_1	TRUE	4.69609e-12	2161	2716	448	0.164948	0.207311	GO:0009888	GO:BP	tissue development	18092
query_1	TRUE	5.33196e-12	2337	2716	478	0.175994	0.204536	GO:0006928	GO:BP	movement of cell or subcellular component	18092
query_1	TRUE	6.93062e-12	304	2716	98	0.0360825	0.322368	GO:0001822	GO:BP	kidney development	18092
query_1	TRUE	8.76192e-12	1494	2716	329	0.121134	0.220214	GO:0007155	GO:BP	cell adhesion	18092
query_1	TRUE	9.74812e-12	1501	2716	330	0.121502	0.219853	GO:0022610	GO:BP	biological adhesion	18092
query_1	TRUE	1.01954e-11	351	2716	108	0.0397644	0.307692	GO:0001655	GO:BP	urogenital system development	18092
query_1	TRUE	1.27795e-11	450	2716	129	0.0474963	0.286667	GO:0042391	GO:BP	regulation of membrane potential	18092
query_1	TRUE	1.47967e-11	2161	2716	445	0.163844	0.205923	GO:0048468	GO:BP	cell development	18092
query_1	TRUE	1.47967e-11	632	2716	166	0.0611193	0.262658	GO:0044057	GO:BP	regulation of system process	18092
query_1	TRUE	1.47967e-11	6353	2716	1126	0.41458	0.177239	GO:0007165	GO:BP	signal transduction	18092
query_1	TRUE	2.21215e-11	1748	2716	372	0.136966	0.212815	GO:0007267	GO:BP	cell-cell signaling	18092
query_1	TRUE	4.17017e-10	1698	2716	357	0.131443	0.210247	GO:0009719	GO:BP	response to endogenous stimulus	18092
query_1	TRUE	1.34809e-09	543	2716	142	0.0522828	0.26151	GO:0010817	GO:BP	regulation of hormone levels	18092
query_1	TRUE	1.55192e-09	978	2716	225	0.0828424	0.230061	GO:0014070	GO:BP	response to organic cyclic compound	18092
query_1	TRUE	1.9972e-09	1106	2716	248	0.0913108	0.224231	GO:0009887	GO:BP	animal organ morphogenesis	18092
query_1	TRUE	1.9972e-09	736	2716	179	0.0659057	0.243207	GO:0099537	GO:BP	trans-synaptic signaling	18092
query_1	TRUE	2.28592e-09	727	2716	177	0.0651694	0.243466	GO:0007268	GO:BP	chemical synaptic transmission	18092
query_1	TRUE	2.28592e-09	727	2716	177	0.0651694	0.243466	GO:0098916	GO:BP	anterograde trans-synaptic signaling	18092
query_1	TRUE	4.03045e-09	1219	2716	267	0.0983063	0.219032	GO:0072359	GO:BP	circulatory system development	18092
query_1	TRUE	5.40391e-09	1178	2716	259	0.0953608	0.219864	GO:0035295	GO:BP	tube development	18092
query_1	TRUE	5.95725e-09	306	2716	91	0.0335052	0.297386	GO:1903522	GO:BP	regulation of blood circulation	18092
query_1	TRUE	6.75375e-09	1627	2716	338	0.124448	0.207744	GO:0030030	GO:BP	cell projection organization	18092
query_1	TRUE	6.75375e-09	252	2716	79	0.0290869	0.313492	GO:0003018	GO:BP	vascular process in circulatory system	18092
query_1	TRUE	8.47669e-09	760	2716	181	0.0666421	0.238158	GO:0099536	GO:BP	synaptic signaling	18092
query_1	TRUE	9.19712e-09	538	2716	138	0.05081	0.256506	GO:0048871	GO:BP	multicellular organismal homeostasis	18092
query_1	TRUE	1.13109e-08	929	2716	212	0.078056	0.228202	GO:0030001	GO:BP	metal ion transport	18092
query_1	TRUE	2.28668e-08	281	2716	84	0.0309278	0.298932	GO:0098742	GO:BP	cell-cell adhesion via plasma-membrane adhesion molecules	18092
query_1	TRUE	2.6256e-08	1434	2716	301	0.110825	0.209902	GO:0071495	GO:BP	cellular response to endogenous stimulus	18092
query_1	TRUE	2.79512e-08	598	2716	148	0.0544919	0.247492	GO:0007423	GO:BP	sensory organ development	18092
query_1	TRUE	3.09817e-08	1391	2716	293	0.107879	0.21064	GO:0043269	GO:BP	regulation of ion transport	18092
query_1	TRUE	4.82775e-08	148	2716	53	0.019514	0.358108	GO:0055123	GO:BP	digestive system development	18092
query_1	TRUE	4.82775e-08	1205	2716	259	0.0953608	0.214938	GO:0006812	GO:BP	cation transport	18092
query_1	TRUE	4.82775e-08	1586	2716	326	0.120029	0.205549	GO:0120036	GO:BP	plasma membrane bounded cell projection organization	18092
query_1	TRUE	6.52425e-08	595	2716	146	0.0537555	0.245378	GO:0034762	GO:BP	regulation of transmembrane transport	18092
query_1	TRUE	6.57661e-08	590	2716	145	0.0533873	0.245763	GO:0034765	GO:BP	regulation of ion transmembrane transport	18092
query_1	TRUE	1.15499e-07	295	2716	85	0.031296	0.288136	GO:0060047	GO:BP	heart contraction	18092
query_1	TRUE	1.15499e-07	1115	2716	241	0.0887334	0.216143	GO:0007167	GO:BP	enzyme linked receptor protein signaling pathway	18092
query_1	TRUE	1.47425e-07	2506	2716	479	0.176362	0.191141	GO:0007399	GO:BP	nervous system development	18092
query_1	TRUE	2.77692e-07	975	2716	214	0.0787923	0.219487	GO:0035239	GO:BP	tube morphogenesis	18092
query_1	TRUE	2.79572e-07	305	2716	86	0.0316642	0.281967	GO:0003015	GO:BP	heart process	18092
query_1	TRUE	2.9184e-07	168	2716	56	0.0206186	0.333333	GO:0003341	GO:BP	cilium movement	18092
query_1	TRUE	3.22464e-07	231	2716	70	0.0257732	0.30303	GO:0042445	GO:BP	hormone metabolic process	18092
query_1	TRUE	3.22464e-07	933	2716	206	0.0758468	0.220793	GO:0009725	GO:BP	response to hormone	18092
query_1	TRUE	3.30475e-07	259	2716	76	0.0279823	0.293436	GO:0008016	GO:BP	regulation of heart contraction	18092
query_1	TRUE	3.30475e-07	824	2716	186	0.0684831	0.225728	GO:0030029	GO:BP	actin filament-based process	18092
query_1	TRUE	3.30629e-07	9469	2716	1562	0.57511	0.164959	GO:0050896	GO:BP	response to stimulus	18092
query_1	TRUE	3.47828e-07	440	2716	113	0.0416053	0.256818	GO:0006816	GO:BP	calcium ion transport	18092
query_1	TRUE	3.54792e-07	522	2716	129	0.0474963	0.247126	GO:0023061	GO:BP	signal release	18092
query_1	TRUE	3.84017e-07	1244	2716	261	0.0960972	0.209807	GO:0048878	GO:BP	chemical homeostasis	18092
query_1	TRUE	4.20432e-07	242	2716	72	0.0265096	0.297521	GO:0006814	GO:BP	sodium ion transport	18092
query_1	TRUE	4.29081e-07	136	2716	48	0.017673	0.352941	GO:0048565	GO:BP	digestive tract development	18092
query_1	TRUE	4.29081e-07	730	2716	168	0.0618557	0.230137	GO:0034330	GO:BP	cell junction organization	18092
query_1	TRUE	5.06664e-07	813	2716	183	0.0673785	0.225092	GO:0032989	GO:BP	cellular component morphogenesis	18092
query_1	TRUE	5.59533e-07	207	2716	64	0.0235641	0.309179	GO:0035637	GO:BP	multicellular organismal signaling	18092
query_1	TRUE	6.72246e-07	142	2716	49	0.0180412	0.34507	GO:0001508	GO:BP	action potential	18092
query_1	TRUE	7.23258e-07	817	2716	183	0.0673785	0.22399	GO:0030855	GO:BP	epithelial cell differentiation	18092
query_1	TRUE	9.03581e-07	106	2716	40	0.0147275	0.377358	GO:0002027	GO:BP	regulation of heart rate	18092
query_1	TRUE	1.03845e-06	449	2716	113	0.0416053	0.25167	GO:0034329	GO:BP	cell junction assembly	18092
query_1	TRUE	1.1536e-06	262	2716	75	0.0276141	0.28626	GO:0007187	GO:BP	G protein-coupled receptor signaling pathway, coupled to cyclic nucleotide second messenger	18092
query_1	TRUE	1.62665e-06	73	2716	31	0.0114138	0.424658	GO:0010517	GO:BP	regulation of phospholipase activity	18092
query_1	TRUE	2.22983e-06	101	2716	38	0.0139912	0.376238	GO:0060191	GO:BP	regulation of lipase activity	18092
query_1	TRUE	2.32645e-06	1235	2716	255	0.0938881	0.206478	GO:0048646	GO:BP	anatomical structure formation involved in morphogenesis	18092
query_1	TRUE	2.55046e-06	2033	2716	391	0.143962	0.192327	GO:0042592	GO:BP	homeostatic process	18092
query_1	TRUE	3.16868e-06	1063	2716	224	0.0824742	0.210724	GO:0000902	GO:BP	cell morphogenesis	18092
query_1	TRUE	3.16868e-06	2055	2716	394	0.145066	0.191727	GO:0040011	GO:BP	locomotion	18092
query_1	TRUE	3.25773e-06	1361	2716	276	0.10162	0.202792	GO:0060429	GO:BP	epithelium development	18092
query_1	TRUE	3.47411e-06	1391	2716	281	0.103461	0.202013	GO:0034220	GO:BP	ion transmembrane transport	18092
query_1	TRUE	4.11713e-06	404	2716	102	0.0375552	0.252475	GO:0150063	GO:BP	visual system development	18092
query_1	TRUE	4.57412e-06	410	2716	103	0.0379234	0.25122	GO:0048880	GO:BP	sensory system development	18092
query_1	TRUE	4.57412e-06	7840	2716	1305	0.480486	0.166454	GO:0051716	GO:BP	cellular response to stimulus	18092
query_1	TRUE	4.62699e-06	400	2716	101	0.037187	0.2525	GO:0001654	GO:BP	eye development	18092
query_1	TRUE	4.78521e-06	129	2716	44	0.0162003	0.341085	GO:0035296	GO:BP	regulation of tube diameter	18092
query_1	TRUE	4.78521e-06	457	2716	112	0.0412371	0.245077	GO:0007389	GO:BP	pattern specification process	18092
query_1	TRUE	4.78521e-06	129	2716	44	0.0162003	0.341085	GO:0097746	GO:BP	blood vessel diameter maintenance	18092
query_1	TRUE	6.13316e-06	130	2716	44	0.0162003	0.338462	GO:0035150	GO:BP	regulation of tube size	18092
query_1	TRUE	6.4534e-06	152	2716	49	0.0180412	0.322368	GO:0051592	GO:BP	response to calcium ion	18092
query_1	TRUE	6.45848e-06	126	2716	43	0.0158321	0.34127	GO:0070252	GO:BP	actin-mediated cell contraction	18092
query_1	TRUE	7.63174e-06	144	2716	47	0.0173049	0.326389	GO:0072073	GO:BP	kidney epithelium development	18092
query_1	TRUE	8.20543e-06	349	2716	90	0.033137	0.25788	GO:0043010	GO:BP	camera-type eye development	18092
query_1	TRUE	8.90829e-06	1366	2716	274	0.100884	0.200586	GO:0051094	GO:BP	positive regulation of developmental process	18092
query_1	TRUE	8.90829e-06	847	2716	183	0.0673785	0.216057	GO:0001944	GO:BP	vasculature development	18092
query_1	TRUE	9.95949e-06	882	2716	189	0.0695876	0.214286	GO:0098660	GO:BP	inorganic ion transmembrane transport	18092
query_1	TRUE	1.13015e-05	418	2716	103	0.0379234	0.246411	GO:0060537	GO:BP	muscle tissue development	18092
query_1	TRUE	1.14348e-05	224	2716	64	0.0235641	0.285714	GO:0031424	GO:BP	keratinization	18092
query_1	TRUE	1.16139e-05	362	2716	92	0.0338733	0.254144	GO:0051480	GO:BP	regulation of cytosolic calcium ion concentration	18092
query_1	TRUE	1.17009e-05	87	2716	33	0.0121502	0.37931	GO:0007193	GO:BP	adenylate cyclase-inhibiting G protein-coupled receptor signaling pathway	18092
query_1	TRUE	1.17491e-05	36	2716	19	0.00699558	0.527778	GO:0086010	GO:BP	membrane depolarization during action potential	18092
query_1	TRUE	1.21752e-05	201	2716	59	0.0217231	0.293532	GO:0008217	GO:BP	regulation of blood pressure	18092
query_1	TRUE	1.22929e-05	1175	2716	240	0.0883652	0.204255	GO:0048666	GO:BP	neuron development	18092
query_1	TRUE	1.2544e-05	169	2716	52	0.0191458	0.307692	GO:0007156	GO:BP	homophilic cell adhesion via plasma membrane adhesion molecules	18092
query_1	TRUE	1.26998e-05	594	2716	136	0.0500736	0.228956	GO:0007507	GO:BP	heart development	18092
query_1	TRUE	1.35043e-05	814	2716	176	0.0648012	0.216216	GO:0050801	GO:BP	ion homeostasis	18092
query_1	TRUE	1.42355e-05	2903	2716	528	0.194404	0.181881	GO:0032879	GO:BP	regulation of localization	18092
query_1	TRUE	1.4305e-05	1639	2716	319	0.117452	0.194631	GO:0055085	GO:BP	transmembrane transport	18092
query_1	TRUE	1.66784e-05	912	2716	193	0.0710604	0.211623	GO:0098655	GO:BP	cation transmembrane transport	18092
query_1	TRUE	1.69581e-05	485	2716	115	0.0423417	0.237113	GO:0070838	GO:BP	divalent metal ion transport	18092
query_1	TRUE	2.0132e-05	769	2716	167	0.0614875	0.217165	GO:0000904	GO:BP	cell morphogenesis involved in differentiation	18092
query_1	TRUE	2.35621e-05	399	2716	98	0.0360825	0.245614	GO:0030198	GO:BP	extracellular matrix organization	18092
query_1	TRUE	2.36317e-05	810	2716	174	0.0640648	0.214815	GO:0001568	GO:BP	blood vessel development	18092
query_1	TRUE	2.36818e-05	191	2716	56	0.0206186	0.293194	GO:0007416	GO:BP	synapse assembly	18092
query_1	TRUE	2.59509e-05	400	2716	98	0.0360825	0.245	GO:0043062	GO:BP	extracellular structure organization	18092
query_1	TRUE	2.59509e-05	173	2716	52	0.0191458	0.300578	GO:0035725	GO:BP	sodium ion transmembrane transport	18092
query_1	TRUE	2.64958e-05	137	2716	44	0.0162003	0.321168	GO:0034754	GO:BP	cellular hormone metabolic process	18092
query_1	TRUE	2.74984e-05	411	2716	100	0.0368189	0.243309	GO:0010959	GO:BP	regulation of metal ion transport	18092
query_1	TRUE	2.82971e-05	235	2716	65	0.0239323	0.276596	GO:0007188	GO:BP	adenylate cyclase-modulating G protein-coupled receptor signaling pathway	18092
query_1	TRUE	3.4294e-05	492	2716	115	0.0423417	0.23374	GO:0072511	GO:BP	divalent inorganic cation transport	18092
query_1	TRUE	3.99127e-05	1445	2716	283	0.104197	0.195848	GO:0030182	GO:BP	neuron differentiation	18092
query_1	TRUE	4.02099e-05	139	2716	44	0.0162003	0.316547	GO:0045667	GO:BP	regulation of osteoblast differentiation	18092
query_1	TRUE	4.15699e-05	478	2716	112	0.0412371	0.23431	GO:0055074	GO:BP	calcium ion homeostasis	18092
query_1	TRUE	4.20493e-05	272	2716	72	0.0265096	0.264706	GO:0032412	GO:BP	regulation of ion transmembrane transporter activity	18092
query_1	TRUE	4.64161e-05	328	2716	83	0.0305596	0.253049	GO:0007204	GO:BP	positive regulation of cytosolic calcium ion concentration	18092
query_1	TRUE	4.6694e-05	76	2716	29	0.0106775	0.381579	GO:0060193	GO:BP	positive regulation of lipase activity	18092
query_1	TRUE	4.81255e-05	283	2716	74	0.0272459	0.261484	GO:0022898	GO:BP	regulation of transmembrane transporter activity	18092
query_1	TRUE	5.2799e-05	249	2716	67	0.0246686	0.269076	GO:0045444	GO:BP	fat cell differentiation	18092
query_1	TRUE	5.50762e-05	465	2716	109	0.0401325	0.234409	GO:0006874	GO:BP	cellular calcium ion homeostasis	18092
query_1	TRUE	5.6503e-05	2894	2716	521	0.191826	0.180028	GO:0051239	GO:BP	regulation of multicellular organismal process	18092
query_1	TRUE	6.2567e-05	285	2716	74	0.0272459	0.259649	GO:0007411	GO:BP	axon guidance	18092
query_1	TRUE	6.32963e-05	128	2716	41	0.0150957	0.320312	GO:0001539	GO:BP	cilium or flagellum-dependent cell motility	18092
query_1	TRUE	6.32963e-05	128	2716	41	0.0150957	0.320312	GO:0060285	GO:BP	cilium-dependent cell motility	18092
query_1	TRUE	6.36785e-05	336	2716	84	0.0309278	0.25	GO:0009914	GO:BP	hormone transport	18092
query_1	TRUE	6.36785e-05	183	2716	53	0.019514	0.289617	GO:0006941	GO:BP	striated muscle contraction	18092
query_1	TRUE	6.43256e-05	1722	2716	328	0.120766	0.190476	GO:0022008	GO:BP	neurogenesis	18092
query_1	TRUE	6.43256e-05	115	2716	38	0.0139912	0.330435	GO:0010927	GO:BP	cellular component assembly involved in morphogenesis	18092
query_1	TRUE	6.56776e-05	188	2716	54	0.0198822	0.287234	GO:0030323	GO:BP	respiratory tube development	18092
query_1	TRUE	6.82852e-05	489	2716	113	0.0416053	0.231084	GO:0007409	GO:BP	axonogenesis	18092
query_1	TRUE	6.82852e-05	286	2716	74	0.0272459	0.258741	GO:0097485	GO:BP	neuron projection guidance	18092
query_1	TRUE	6.90102e-05	680	2716	148	0.0544919	0.217647	GO:0048812	GO:BP	neuron projection morphogenesis	18092
query_1	TRUE	6.94412e-05	1856	2716	350	0.128866	0.188578	GO:0051674	GO:BP	localization of cell	18092
query_1	TRUE	6.94412e-05	1856	2716	350	0.128866	0.188578	GO:0048870	GO:BP	cell motility	18092
query_1	TRUE	6.97336e-05	1599	2716	307	0.113034	0.191995	GO:0048699	GO:BP	generation of neurons	18092
query_1	TRUE	7.0067e-05	363	2716	89	0.0327688	0.245179	GO:1904062	GO:BP	regulation of cation transmembrane transport	18092
query_1	TRUE	7.09446e-05	62	2716	25	0.00920471	0.403226	GO:0060042	GO:BP	retina morphogenesis in camera-type eye	18092
query_1	TRUE	7.09446e-05	62	2716	25	0.00920471	0.403226	GO:0010518	GO:BP	positive regulation of phospholipase activity	18092
query_1	TRUE	7.09446e-05	184	2716	53	0.019514	0.288043	GO:0030324	GO:BP	lung development	18092
query_1	TRUE	7.47445e-05	1798	2716	340	0.125184	0.189099	GO:0042127	GO:BP	regulation of cell population proliferation	18092
query_1	TRUE	7.4992e-05	103	2716	35	0.0128866	0.339806	GO:0001823	GO:BP	mesonephros development	18092
query_1	TRUE	7.70617e-05	534	2716	121	0.0445508	0.226592	GO:0061564	GO:BP	axon development	18092
query_1	TRUE	7.70617e-05	682	2716	148	0.0544919	0.217009	GO:0009611	GO:BP	response to wounding	18092
query_1	TRUE	7.70617e-05	671	2716	146	0.0537555	0.217586	GO:0071417	GO:BP	cellular response to organonitrogen compound	18092
query_1	TRUE	8.16493e-05	298	2716	76	0.0279823	0.255034	GO:0032409	GO:BP	regulation of transporter activity	18092
query_1	TRUE	8.2233e-05	672	2716	146	0.0537555	0.217262	GO:0055065	GO:BP	metal ion homeostasis	18092
query_1	TRUE	8.2233e-05	95	2716	33	0.0121502	0.347368	GO:0034308	GO:BP	primary alcohol metabolic process	18092
query_1	TRUE	8.2233e-05	258	2716	68	0.0250368	0.263566	GO:0003007	GO:BP	heart morphogenesis	18092
query_1	TRUE	8.33149e-05	617	2716	136	0.0500736	0.220421	GO:0048667	GO:BP	cell morphogenesis involved in neuron differentiation	18092
query_1	TRUE	8.64011e-05	355	2716	87	0.0320324	0.24507	GO:0050817	GO:BP	coagulation	18092
query_1	TRUE	8.70384e-05	723	2716	155	0.0570692	0.214385	GO:0030036	GO:BP	actin cytoskeleton organization	18092
query_1	TRUE	8.70384e-05	723	2716	155	0.0570692	0.214385	GO:0048514	GO:BP	blood vessel morphogenesis	18092
query_1	TRUE	8.79645e-05	768	2716	163	0.0600147	0.21224	GO:0098771	GO:BP	inorganic ion homeostasis	18092
query_1	TRUE	9.47806e-05	553	2716	124	0.0456554	0.224231	GO:0042060	GO:BP	wound healing	18092
query_1	TRUE	9.49092e-05	48	2716	21	0.00773196	0.4375	GO:0042572	GO:BP	retinol metabolic process	18092
query_1	TRUE	9.66408e-05	377	2716	91	0.0335052	0.241379	GO:0010038	GO:BP	response to metal ion	18092
query_1	TRUE	9.86732e-05	521	2716	118	0.0434462	0.226488	GO:0072507	GO:BP	divalent inorganic cation homeostasis	18092
query_1	TRUE	0.000106758	321	2716	80	0.0294551	0.249221	GO:0070588	GO:BP	calcium ion transmembrane transport	18092
query_1	TRUE	0.000106758	2091	2716	387	0.142489	0.185079	GO:0008283	GO:BP	cell population proliferation	18092
query_1	TRUE	0.000106758	12801	2716	2022	0.744477	0.157956	GO:0065007	GO:BP	biological regulation	18092
query_1	TRUE	0.000118287	327	2716	81	0.0298233	0.247706	GO:0046879	GO:BP	hormone secretion	18092
query_1	TRUE	0.000120494	694	2716	149	0.0548601	0.214697	GO:0120039	GO:BP	plasma membrane bounded cell projection morphogenesis	18092
query_1	TRUE	0.000123249	212	2716	58	0.0213549	0.273585	GO:0007626	GO:BP	locomotory behavior	18092
query_1	TRUE	0.000124195	155	2716	46	0.0169367	0.296774	GO:0030048	GO:BP	actin filament-based movement	18092
query_1	TRUE	0.000128739	146	2716	44	0.0162003	0.30137	GO:0060078	GO:BP	regulation of postsynaptic membrane potential	18092
query_1	TRUE	0.000128739	146	2716	44	0.0162003	0.30137	GO:0072006	GO:BP	nephron development	18092
query_1	TRUE	0.000131329	757	2716	160	0.0589102	0.211361	GO:0055080	GO:BP	cation homeostasis	18092
query_1	TRUE	0.000133472	1830	2716	343	0.126289	0.187432	GO:0051049	GO:BP	regulation of transport	18092
query_1	TRUE	0.000140377	303	2716	76	0.0279823	0.250825	GO:0048562	GO:BP	embryonic organ morphogenesis	18092
query_1	TRUE	0.000145586	1178	2716	233	0.0857879	0.197793	GO:1901698	GO:BP	response to nitrogen compound	18092
query_1	TRUE	0.000158577	1034	2716	208	0.0765832	0.201161	GO:0031175	GO:BP	neuron projection development	18092
query_1	TRUE	0.000160107	698	2716	149	0.0548601	0.213467	GO:0048858	GO:BP	cell projection morphogenesis	18092
query_1	TRUE	0.000162093	1774	2716	333	0.122607	0.187711	GO:1901700	GO:BP	response to oxygen-containing compound	18092
query_1	TRUE	0.000166218	279	2716	71	0.0261414	0.25448	GO:0046883	GO:BP	regulation of hormone secretion	18092
query_1	TRUE	0.000166811	274	2716	70	0.0257732	0.255474	GO:0007611	GO:BP	learning or memory	18092
query_1	TRUE	0.000168453	46	2716	20	0.00736377	0.434783	GO:0010863	GO:BP	positive regulation of phospholipase C activity	18092
query_1	TRUE	0.000174644	383	2716	91	0.0335052	0.237598	GO:0007018	GO:BP	microtubule-based movement	18092
query_1	TRUE	0.000176722	616	2716	134	0.0493373	0.217532	GO:0048598	GO:BP	embryonic morphogenesis	18092
query_1	TRUE	0.000179497	39	2716	18	0.00662739	0.461538	GO:0030049	GO:BP	muscle filament sliding	18092
query_1	TRUE	0.000179497	39	2716	18	0.00662739	0.461538	GO:0033275	GO:BP	actin-myosin filament sliding	18092
query_1	TRUE	0.000180252	672	2716	144	0.0530191	0.214286	GO:0061061	GO:BP	muscle structure development	18092
query_1	TRUE	0.000184805	347	2716	84	0.0309278	0.242075	GO:0007596	GO:BP	blood coagulation	18092
query_1	TRUE	0.000187099	437	2716	101	0.037187	0.231121	GO:0050808	GO:BP	synapse organization	18092
query_1	TRUE	0.000192206	29	2716	15	0.00552283	0.517241	GO:0061440	GO:BP	kidney vasculature development	18092
query_1	TRUE	0.000192206	82	2716	29	0.0106775	0.353659	GO:0042310	GO:BP	vasoconstriction	18092
query_1	TRUE	0.000192206	29	2716	15	0.00552283	0.517241	GO:0061437	GO:BP	renal system vasculature development	18092
query_1	TRUE	0.000195514	144	2716	43	0.0158321	0.298611	GO:0060048	GO:BP	cardiac muscle contraction	18092
query_1	TRUE	0.000195777	158	2716	46	0.0169367	0.291139	GO:0060041	GO:BP	retina development in camera-type eye	18092
query_1	TRUE	0.000196533	374	2716	89	0.0327688	0.237968	GO:0007178	GO:BP	transmembrane receptor protein serine/threonine kinase signaling pathway	18092
query_1	TRUE	0.000197354	668	2716	143	0.052651	0.214072	GO:0051046	GO:BP	regulation of secretion	18092
query_1	TRUE	0.000198103	454	2716	104	0.0382916	0.229075	GO:0019932	GO:BP	second-messenger-mediated signaling	18092
query_1	TRUE	0.000198753	348	2716	84	0.0309278	0.241379	GO:0007517	GO:BP	muscle organ development	18092
query_1	TRUE	0.000200223	2648	2716	475	0.17489	0.179381	GO:0050793	GO:BP	regulation of developmental process	18092
query_1	TRUE	0.000200223	182	2716	51	0.0187776	0.28022	GO:0050954	GO:BP	sensory perception of mechanical stimulus	18092
query_1	TRUE	0.000203265	66	2716	25	0.00920471	0.378788	GO:0032835	GO:BP	glomerulus development	18092
query_1	TRUE	0.000203265	901	2716	184	0.0677467	0.204218	GO:0098609	GO:BP	cell-cell adhesion	18092
query_1	TRUE	0.000211368	520	2716	116	0.0427099	0.223077	GO:0050878	GO:BP	regulation of body fluid levels	18092
query_1	TRUE	0.000211368	608	2716	132	0.0486009	0.217105	GO:1903530	GO:BP	regulation of secretion by cell	18092
query_1	TRUE	0.000219803	122	2716	38	0.0139912	0.311475	GO:0120254	GO:BP	olefinic compound metabolic process	18092
query_1	TRUE	0.000237749	654	2716	140	0.0515464	0.214067	GO:0032870	GO:BP	cellular response to hormone stimulus	18092
query_1	TRUE	0.000247337	79	2716	28	0.0103093	0.35443	GO:0001895	GO:BP	retina homeostasis	18092
query_1	TRUE	0.000257014	997	2716	200	0.0736377	0.200602	GO:0008284	GO:BP	positive regulation of cell population proliferation	18092
query_1	TRUE	0.000271116	894	2716	182	0.0670103	0.203579	GO:0045597	GO:BP	positive regulation of cell differentiation	18092
query_1	TRUE	0.000278392	485	2716	109	0.0401325	0.224742	GO:0008544	GO:BP	epidermis development	18092
query_1	TRUE	0.000281332	595	2716	129	0.0474963	0.216807	GO:0006875	GO:BP	cellular metal ion homeostasis	18092
query_1	TRUE	0.000290365	44	2716	19	0.00699558	0.431818	GO:0016339	GO:BP	calcium-dependent cell-cell adhesion via plasma membrane cell adhesion molecules	18092
query_1	TRUE	0.00029768	352	2716	84	0.0309278	0.238636	GO:0007599	GO:BP	hemostasis	18092
query_1	TRUE	0.000301767	368	2716	87	0.0320324	0.236413	GO:0009913	GO:BP	epidermal cell differentiation	18092
query_1	TRUE	0.000301767	368	2716	87	0.0320324	0.236413	GO:0031589	GO:BP	cell-substrate adhesion	18092
query_1	TRUE	0.000317579	48	2716	20	0.00736377	0.416667	GO:1900274	GO:BP	regulation of phospholipase C activity	18092
query_1	TRUE	0.000329164	76	2716	27	0.00994109	0.355263	GO:0035082	GO:BP	axoneme assembly	18092
query_1	TRUE	0.000344869	428	2716	98	0.0360825	0.228972	GO:0001503	GO:BP	ossification	18092
query_1	TRUE	0.000350833	68	2716	25	0.00920471	0.367647	GO:0030239	GO:BP	myofibril assembly	18092
query_1	TRUE	0.000351614	89	2716	30	0.0110457	0.337079	GO:0051899	GO:BP	membrane depolarization	18092
query_1	TRUE	0.000358643	847	2716	173	0.0636966	0.20425	GO:0055082	GO:BP	cellular chemical homeostasis	18092
query_1	TRUE	0.000366052	41	2716	18	0.00662739	0.439024	GO:0007190	GO:BP	activation of adenylate cyclase activity	18092
query_1	TRUE	0.000381304	717	2716	150	0.0552283	0.209205	GO:0032990	GO:BP	cell part morphogenesis	18092
query_1	TRUE	0.000381304	627	2716	134	0.0493373	0.213716	GO:0001525	GO:BP	angiogenesis	18092
query_1	TRUE	0.000384453	107	2716	34	0.0125184	0.317757	GO:0071869	GO:BP	response to catecholamine	18092
query_1	TRUE	0.000384453	107	2716	34	0.0125184	0.317757	GO:0071867	GO:BP	response to monoamine	18092
query_1	TRUE	0.000393245	81	2716	28	0.0103093	0.345679	GO:0033555	GO:BP	multicellular organismal response to stress	18092
query_1	TRUE	0.000408824	792	2716	163	0.0600147	0.205808	GO:0098662	GO:BP	inorganic cation transmembrane transport	18092
query_1	TRUE	0.000410719	267	2716	67	0.0246686	0.250936	GO:0030072	GO:BP	peptide hormone secretion	18092
query_1	TRUE	0.000413269	192	2716	52	0.0191458	0.270833	GO:2001257	GO:BP	regulation of cation channel activity	18092
query_1	TRUE	0.000413269	1538	2716	290	0.106775	0.188557	GO:0022414	GO:BP	reproductive process	18092
query_1	TRUE	0.000413269	501	2716	111	0.0408689	0.221557	GO:0072503	GO:BP	cellular divalent inorganic cation homeostasis	18092
query_1	TRUE	0.000426219	227	2716	59	0.0217231	0.259912	GO:0019935	GO:BP	cyclic-nucleotide-mediated signaling	18092
query_1	TRUE	0.000426219	1094	2716	215	0.0791605	0.196527	GO:0010243	GO:BP	response to organonitrogen compound	18092
query_1	TRUE	0.000426219	135	2716	40	0.0147275	0.296296	GO:0009799	GO:BP	specification of symmetry	18092
query_1	TRUE	0.000426219	222	2716	58	0.0213549	0.261261	GO:0090276	GO:BP	regulation of peptide hormone secretion	18092
query_1	TRUE	0.000445858	399	2716	92	0.0338733	0.230576	GO:0014706	GO:BP	striated muscle tissue development	18092
query_1	TRUE	0.000461268	8	2716	7	0.00257732	0.875	GO:0060872	GO:BP	semicircular canal development	18092
query_1	TRUE	0.000469264	1541	2716	290	0.106775	0.188189	GO:0000003	GO:BP	reproduction	18092
query_1	TRUE	0.000495995	122	2716	37	0.013623	0.303279	GO:0006805	GO:BP	xenobiotic metabolic process	18092
query_1	TRUE	0.000503303	520	2716	114	0.0419735	0.219231	GO:0090066	GO:BP	regulation of anatomical structure size	18092
query_1	TRUE	0.000521139	688	2716	144	0.0530191	0.209302	GO:0048729	GO:BP	tissue morphogenesis	18092
query_1	TRUE	0.0005451	234	2716	60	0.0220913	0.25641	GO:0006836	GO:BP	neurotransmitter transport	18092
query_1	TRUE	0.0005451	199	2716	53	0.019514	0.266332	GO:0009566	GO:BP	fertilization	18092
query_1	TRUE	0.0005451	837	2716	170	0.062592	0.203106	GO:0060322	GO:BP	head development	18092
query_1	TRUE	0.00055181	46	2716	19	0.00699558	0.413043	GO:0010463	GO:BP	mesenchymal cell proliferation	18092
query_1	TRUE	0.000556131	275	2716	68	0.0250368	0.247273	GO:0090596	GO:BP	sensory organ morphogenesis	18092
query_1	TRUE	0.000560972	661	2716	139	0.0511782	0.210287	GO:0006935	GO:BP	chemotaxis	18092
query_1	TRUE	0.00057288	13	2716	9	0.0033137	0.692308	GO:0032429	GO:BP	regulation of phospholipase A2 activity	18092
query_1	TRUE	0.000576486	151	2716	43	0.0158321	0.284768	GO:0009582	GO:BP	detection of abiotic stimulus	18092
query_1	TRUE	0.000588383	690	2716	144	0.0530191	0.208696	GO:0006873	GO:BP	cellular ion homeostasis	18092
query_1	TRUE	0.000601865	190	2716	51	0.0187776	0.268421	GO:0061138	GO:BP	morphogenesis of a branching epithelium	18092
query_1	TRUE	0.000614062	205	2716	54	0.0198822	0.263415	GO:0048839	GO:BP	inner ear development	18092
query_1	TRUE	0.000614062	161	2716	45	0.0165685	0.279503	GO:0007605	GO:BP	sensory perception of sound	18092
query_1	TRUE	0.000638016	92	2716	30	0.0110457	0.326087	GO:0001656	GO:BP	metanephros development	18092
query_1	TRUE	0.000638016	92	2716	30	0.0110457	0.326087	GO:0014068	GO:BP	positive regulation of phosphatidylinositol 3-kinase signaling	18092
query_1	TRUE	0.000638016	39	2716	17	0.0062592	0.435897	GO:0086091	GO:BP	regulation of heart rate by cardiac conduction	18092
query_1	TRUE	0.000638767	452	2716	101	0.037187	0.223451	GO:0050804	GO:BP	modulation of chemical synaptic transmission	18092
query_1	TRUE	0.000638767	261	2716	65	0.0239323	0.249042	GO:0090257	GO:BP	regulation of muscle system process	18092
query_1	TRUE	0.000655098	743	2716	153	0.0563328	0.205922	GO:0071363	GO:BP	cellular response to growth factor stimulus	18092
query_1	TRUE	0.000657297	726	2716	150	0.0552283	0.206612	GO:1901699	GO:BP	cellular response to nitrogen compound	18092
query_1	TRUE	0.000657956	709	2716	147	0.0541237	0.207334	GO:0045596	GO:BP	negative regulation of cell differentiation	18092
query_1	TRUE	0.000670053	22	2716	12	0.00441826	0.545455	GO:0044241	GO:BP	lipid digestion	18092
query_1	TRUE	0.000674208	16	2716	10	0.00368189	0.625	GO:0072176	GO:BP	nephric duct development	18092
query_1	TRUE	0.000674208	231	2716	59	0.0217231	0.255411	GO:0043583	GO:BP	ear development	18092
query_1	TRUE	0.00067429	138	2716	40	0.0147275	0.289855	GO:0046683	GO:BP	response to organophosphorus	18092
query_1	TRUE	0.00067429	453	2716	101	0.037187	0.222958	GO:0099177	GO:BP	regulation of trans-synaptic signaling	18092
query_1	TRUE	0.00067429	272	2716	67	0.0246686	0.246324	GO:0001894	GO:BP	tissue homeostasis	18092
query_1	TRUE	0.00067429	1695	2716	314	0.115611	0.185251	GO:0045595	GO:BP	regulation of cell differentiation	18092
query_1	TRUE	0.00067429	211	2716	55	0.0202504	0.260664	GO:0060541	GO:BP	respiratory system development	18092
query_1	TRUE	0.000675241	356	2716	83	0.0305596	0.233146	GO:0003002	GO:BP	regionalization	18092
query_1	TRUE	0.000675241	43	2716	18	0.00662739	0.418605	GO:0045494	GO:BP	photoreceptor cell maintenance	18092
query_1	TRUE	0.000679361	267	2716	66	0.0243004	0.247191	GO:0097305	GO:BP	response to alcohol	18092
query_1	TRUE	0.000685502	293	2716	71	0.0261414	0.242321	GO:0021700	GO:BP	developmental maturation	18092
query_1	TRUE	0.000692417	410	2716	93	0.0342415	0.226829	GO:0030900	GO:BP	forebrain development	18092
query_1	TRUE	0.000694915	665	2716	139	0.0511782	0.209023	GO:0042330	GO:BP	taxis	18092
query_1	TRUE	0.000696939	129	2716	38	0.0139912	0.294574	GO:0003014	GO:BP	renal system process	18092
query_1	TRUE	0.000711985	148	2716	42	0.0154639	0.283784	GO:0009581	GO:BP	detection of external stimulus	18092
query_1	TRUE	0.000711985	148	2716	42	0.0154639	0.283784	GO:0061337	GO:BP	cardiac conduction	18092
query_1	TRUE	0.000718967	242	2716	61	0.0224595	0.252066	GO:0001505	GO:BP	regulation of neurotransmitter levels	18092
query_1	TRUE	0.000731367	134	2716	39	0.0143594	0.291045	GO:0009855	GO:BP	determination of bilateral symmetry	18092
query_1	TRUE	0.000733329	153	2716	43	0.0158321	0.281046	GO:0014074	GO:BP	response to purine-containing compound	18092
query_1	TRUE	0.000744119	593	2716	126	0.0463918	0.212479	GO:0071407	GO:BP	cellular response to organic cyclic compound	18092
query_1	TRUE	0.000744119	207	2716	54	0.0198822	0.26087	GO:0031032	GO:BP	actomyosin structure organization	18092
query_1	TRUE	0.000770381	125	2716	37	0.013623	0.296	GO:0007368	GO:BP	determination of left/right symmetry	18092
query_1	TRUE	0.000790757	168	2716	46	0.0169367	0.27381	GO:0031960	GO:BP	response to corticosteroid	18092
query_1	TRUE	0.000822197	98	2716	31	0.0114138	0.316327	GO:0001657	GO:BP	ureteric bud development	18092
query_1	TRUE	0.000822197	149	2716	42	0.0154639	0.281879	GO:0051384	GO:BP	response to glucocorticoid	18092
query_1	TRUE	0.000822197	107	2716	33	0.0121502	0.308411	GO:0001523	GO:BP	retinoid metabolic process	18092
query_1	TRUE	0.000824011	295	2716	71	0.0261414	0.240678	GO:0060485	GO:BP	mesenchyme development	18092
query_1	TRUE	0.000824011	316	2716	75	0.0276141	0.237342	GO:0050890	GO:BP	cognition	18092
query_1	TRUE	0.000838158	1079	2716	210	0.0773196	0.194625	GO:0007417	GO:BP	central nervous system development	18092
query_1	TRUE	0.000848115	1156	2716	223	0.082106	0.192907	GO:0051270	GO:BP	regulation of cellular component movement	18092
query_1	TRUE	0.000848115	771	2716	157	0.0578056	0.203632	GO:0070848	GO:BP	response to growth factor	18092
query_1	TRUE	0.000875245	11	2716	8	0.00294551	0.727273	GO:0097105	GO:BP	presynaptic membrane assembly	18092
query_1	TRUE	0.000925972	1075	2716	209	0.0769514	0.194419	GO:0044703	GO:BP	multi-organism reproductive process	18092
query_1	TRUE	0.000935883	265	2716	65	0.0239323	0.245283	GO:0051924	GO:BP	regulation of calcium ion transport	18092
query_1	TRUE	0.000949777	204	2716	53	0.019514	0.259804	GO:0001763	GO:BP	morphogenesis of a branching structure	18092
query_1	TRUE	0.000963556	56	2716	21	0.00773196	0.375	GO:0050819	GO:BP	negative regulation of coagulation	18092
query_1	TRUE	0.000965943	676	2716	140	0.0515464	0.207101	GO:0030003	GO:BP	cellular cation homeostasis	18092
query_1	TRUE	0.00098519	99	2716	31	0.0114138	0.313131	GO:0072164	GO:BP	mesonephric tubule development	18092
query_1	TRUE	0.00098519	99	2716	31	0.0114138	0.313131	GO:0072163	GO:BP	mesonephric epithelium development	18092
query_1	TRUE	0.00102544	694	2716	143	0.052651	0.206052	GO:0048589	GO:BP	developmental growth	18092
query_1	TRUE	0.00104955	113	2716	34	0.0125184	0.300885	GO:0072009	GO:BP	nephron epithelium development	18092
query_1	TRUE	0.00104955	113	2716	34	0.0125184	0.300885	GO:0016101	GO:BP	diterpenoid metabolic process	18092
query_1	TRUE	0.00105137	73	2716	25	0.00920471	0.342466	GO:0019226	GO:BP	transmission of nerve impulse	18092
query_1	TRUE	0.00105445	127	2716	37	0.013623	0.291339	GO:0071466	GO:BP	cellular response to xenobiotic stimulus	18092
query_1	TRUE	0.00105876	210	2716	54	0.0198822	0.257143	GO:1901654	GO:BP	response to ketone	18092
query_1	TRUE	0.00106129	37	2716	16	0.00589102	0.432432	GO:2000310	GO:BP	regulation of NMDA receptor activity	18092
query_1	TRUE	0.00106129	37	2716	16	0.00589102	0.432432	GO:0042311	GO:BP	vasodilation	18092
query_1	TRUE	0.00106275	104	2716	32	0.011782	0.307692	GO:1901890	GO:BP	positive regulation of cell junction assembly	18092
query_1	TRUE	0.00106435	95	2716	30	0.0110457	0.315789	GO:0060021	GO:BP	roof of mouth development	18092
query_1	TRUE	0.00109335	298	2716	71	0.0261414	0.238255	GO:0046942	GO:BP	carboxylic acid transport	18092
query_1	TRUE	0.001126	82	2716	27	0.00994109	0.329268	GO:0060395	GO:BP	SMAD protein signal transduction	18092
query_1	TRUE	0.00115939	325	2716	76	0.0279823	0.233846	GO:0090287	GO:BP	regulation of cellular response to growth factor stimulus	18092
query_1	TRUE	0.00116696	455	2716	100	0.0368189	0.21978	GO:0048568	GO:BP	embryonic organ development	18092
query_1	TRUE	0.00116696	123	2716	36	0.0132548	0.292683	GO:0006721	GO:BP	terpenoid metabolic process	18092
query_1	TRUE	0.00119243	17	2716	10	0.00368189	0.588235	GO:0072224	GO:BP	metanephric glomerulus development	18092
query_1	TRUE	0.00122935	114	2716	34	0.0125184	0.298246	GO:0006939	GO:BP	smooth muscle contraction	18092
query_1	TRUE	0.00124161	49	2716	19	0.00699558	0.387755	GO:0030195	GO:BP	negative regulation of blood coagulation	18092
query_1	TRUE	0.00124161	49	2716	19	0.00699558	0.387755	GO:0110151	GO:BP	positive regulation of biomineralization	18092
query_1	TRUE	0.00124266	53	2716	20	0.00736377	0.377358	GO:0050873	GO:BP	brown fat cell differentiation	18092
query_1	TRUE	0.00125172	268	2716	65	0.0239323	0.242537	GO:0061448	GO:BP	connective tissue development	18092
query_1	TRUE	0.00126209	87	2716	28	0.0103093	0.321839	GO:1903351	GO:BP	cellular response to dopamine	18092
query_1	TRUE	0.00134406	9	2716	7	0.00257732	0.777778	GO:0072239	GO:BP	metanephric glomerulus vasculature development	18092
query_1	TRUE	0.00134406	9	2716	7	0.00257732	0.777778	GO:0060693	GO:BP	regulation of branching involved in salivary gland morphogenesis	18092
query_1	TRUE	0.00138842	27	2716	13	0.00478645	0.481481	GO:0072012	GO:BP	glomerulus vasculature development	18092
query_1	TRUE	0.00150201	134	2716	38	0.0139912	0.283582	GO:0009410	GO:BP	response to xenobiotic stimulus	18092
query_1	TRUE	0.00153135	173	2716	46	0.0169367	0.265896	GO:0006937	GO:BP	regulation of muscle contraction	18092
query_1	TRUE	0.0015443	120	2716	35	0.0128866	0.291667	GO:0046660	GO:BP	female sex differentiation	18092
query_1	TRUE	0.00155696	88	2716	28	0.0103093	0.318182	GO:1903350	GO:BP	response to dopamine	18092
query_1	TRUE	0.00159071	42	2716	17	0.0062592	0.404762	GO:0008207	GO:BP	C21-steroid hormone metabolic process	18092
query_1	TRUE	0.00159071	144	2716	40	0.0147275	0.277778	GO:0030534	GO:BP	adult behavior	18092
query_1	TRUE	0.00161254	125	2716	36	0.0132548	0.288	GO:0010811	GO:BP	positive regulation of cell-substrate adhesion	18092
query_1	TRUE	0.00161254	75	2716	25	0.00920471	0.333333	GO:0050818	GO:BP	regulation of coagulation	18092
query_1	TRUE	0.00161714	111	2716	33	0.0121502	0.297297	GO:0006821	GO:BP	chloride transport	18092
query_1	TRUE	0.00162472	46	2716	18	0.00662739	0.391304	GO:0022602	GO:BP	ovulation cycle process	18092
query_1	TRUE	0.00162472	54	2716	20	0.00736377	0.37037	GO:0003044	GO:BP	regulation of systemic arterial blood pressure mediated by a chemical signal	18092
query_1	TRUE	0.00163605	50	2716	19	0.00699558	0.38	GO:1900047	GO:BP	negative regulation of hemostasis	18092
query_1	TRUE	0.00165838	329	2716	76	0.0279823	0.231003	GO:0002791	GO:BP	regulation of peptide secretion	18092
query_1	TRUE	0.00165838	130	2716	37	0.013623	0.284615	GO:0003206	GO:BP	cardiac chamber morphogenesis	18092
query_1	TRUE	0.00171281	174	2716	46	0.0169367	0.264368	GO:0003205	GO:BP	cardiac chamber development	18092
query_1	TRUE	0.00171281	71	2716	24	0.00883652	0.338028	GO:0042698	GO:BP	ovulation cycle	18092
query_1	TRUE	0.00171281	179	2716	47	0.0173049	0.26257	GO:0007269	GO:BP	neurotransmitter secretion	18092
query_1	TRUE	0.00171281	179	2716	47	0.0173049	0.26257	GO:0099643	GO:BP	signal release from synapse	18092
query_1	TRUE	0.0017824	107	2716	32	0.011782	0.299065	GO:0001578	GO:BP	microtubule bundle formation	18092
query_1	TRUE	0.0018196	67	2716	23	0.00846834	0.343284	GO:0030193	GO:BP	regulation of blood coagulation	18092
query_1	TRUE	0.00183518	98	2716	30	0.0110457	0.306122	GO:0035249	GO:BP	synaptic transmission, glutamatergic	18092
query_1	TRUE	0.00183518	98	2716	30	0.0110457	0.306122	GO:0061326	GO:BP	renal tubule development	18092
query_1	TRUE	0.00187894	35	2716	15	0.00552283	0.428571	GO:0003351	GO:BP	epithelial cilium movement involved in extracellular fluid movement	18092
query_1	TRUE	0.00187894	21	2716	11	0.00405007	0.52381	GO:0030728	GO:BP	ovulation	18092
query_1	TRUE	0.00187894	21	2716	11	0.00405007	0.52381	GO:0033141	GO:BP	positive regulation of peptidyl-serine phosphorylation of STAT protein	18092
query_1	TRUE	0.00189369	205	2716	52	0.0191458	0.253659	GO:0099504	GO:BP	synaptic vesicle cycle	18092
query_1	TRUE	0.00189528	585	2716	122	0.044919	0.208547	GO:0010035	GO:BP	response to inorganic substance	18092
query_1	TRUE	0.00189528	12	2716	8	0.00294551	0.666667	GO:0072178	GO:BP	nephric duct morphogenesis	18092
query_1	TRUE	0.00189528	12	2716	8	0.00294551	0.666667	GO:0097090	GO:BP	presynaptic membrane organization	18092
query_1	TRUE	0.00189528	241	2716	59	0.0217231	0.244813	GO:0071695	GO:BP	anatomical structure maturation	18092
query_1	TRUE	0.00189528	63	2716	22	0.00810015	0.349206	GO:0019229	GO:BP	regulation of vasoconstriction	18092
query_1	TRUE	0.00189528	12	2716	8	0.00294551	0.666667	GO:0097104	GO:BP	postsynaptic membrane assembly	18092
query_1	TRUE	0.00191756	236	2716	58	0.0213549	0.245763	GO:0048762	GO:BP	mesenchymal cell differentiation	18092
query_1	TRUE	0.00191756	262	2716	63	0.0231959	0.240458	GO:0090092	GO:BP	regulation of transmembrane receptor protein serine/threonine kinase signaling pathway	18092
query_1	TRUE	0.00191756	76	2716	25	0.00920471	0.328947	GO:0003407	GO:BP	neural retina development	18092
query_1	TRUE	0.00192199	103	2716	31	0.0114138	0.300971	GO:0071870	GO:BP	cellular response to catecholamine stimulus	18092
query_1	TRUE	0.00192199	103	2716	31	0.0114138	0.300971	GO:0071868	GO:BP	cellular response to monoamine stimulus	18092
query_1	TRUE	0.00193211	117	2716	34	0.0125184	0.290598	GO:0060294	GO:BP	cilium movement involved in cell motility	18092
query_1	TRUE	0.00199944	28	2716	13	0.00478645	0.464286	GO:0072376	GO:BP	protein activation cascade	18092
query_1	TRUE	0.00199944	28	2716	13	0.00478645	0.464286	GO:0072378	GO:BP	blood coagulation, fibrin clot formation	18092
query_1	TRUE	0.00199944	28	2716	13	0.00478645	0.464286	GO:0060219	GO:BP	camera-type eye photoreceptor cell differentiation	18092
query_1	TRUE	0.00200333	413	2716	91	0.0335052	0.220339	GO:0032970	GO:BP	regulation of actin filament-based process	18092
query_1	TRUE	0.00204542	43	2716	17	0.0062592	0.395349	GO:0001709	GO:BP	cell fate determination	18092
query_1	TRUE	0.0020818	564	2716	118	0.0434462	0.20922	GO:0015672	GO:BP	monovalent inorganic cation transport	18092
query_1	TRUE	0.00210351	196	2716	50	0.0184094	0.255102	GO:0071248	GO:BP	cellular response to metal ion	18092
query_1	TRUE	0.00210351	300	2716	70	0.0257732	0.233333	GO:0050708	GO:BP	regulation of protein secretion	18092
query_1	TRUE	0.00211156	191	2716	49	0.0180412	0.256545	GO:0050796	GO:BP	regulation of insulin secretion	18092
query_1	TRUE	0.00213107	525	2716	111	0.0408689	0.211429	GO:0001501	GO:BP	skeletal system development	18092
query_1	TRUE	0.00216065	354	2716	80	0.0294551	0.225989	GO:0048545	GO:BP	response to steroid hormone	18092
query_1	TRUE	0.00217738	227	2716	56	0.0206186	0.246696	GO:0099003	GO:BP	vesicle-mediated transport in synapse	18092
query_1	TRUE	0.00217823	68	2716	23	0.00846834	0.338235	GO:1900046	GO:BP	regulation of hemostasis	18092
query_1	TRUE	0.00220843	222	2716	55	0.0202504	0.247748	GO:0050953	GO:BP	sensory perception of light stimulus	18092
query_1	TRUE	0.002269	1000	2716	193	0.0710604	0.193	GO:0051093	GO:BP	negative regulation of developmental process	18092
query_1	TRUE	0.0023434	95	2716	29	0.0106775	0.305263	GO:0072080	GO:BP	nephron tubule development	18092
query_1	TRUE	0.00242161	1019	2716	196	0.0721649	0.192345	GO:0010562	GO:BP	positive regulation of phosphorus metabolic process	18092
query_1	TRUE	0.00242161	1019	2716	196	0.0721649	0.192345	GO:0045937	GO:BP	positive regulation of phosphate metabolic process	18092
query_1	TRUE	0.00242749	25	2716	12	0.00441826	0.48	GO:0048745	GO:BP	smooth muscle tissue development	18092
query_1	TRUE	0.00249589	372	2716	83	0.0305596	0.223118	GO:0032956	GO:BP	regulation of actin cytoskeleton organization	18092
query_1	TRUE	0.00256536	768	2716	153	0.0563328	0.199219	GO:0007169	GO:BP	transmembrane receptor protein tyrosine kinase signaling pathway	18092
query_1	TRUE	0.00257101	56	2716	20	0.00736377	0.357143	GO:0086002	GO:BP	cardiac muscle cell action potential involved in contraction	18092
query_1	TRUE	0.00257101	56	2716	20	0.00736377	0.357143	GO:0099172	GO:BP	presynapse organization	18092
query_1	TRUE	0.00264927	40	2716	16	0.00589102	0.4	GO:0010737	GO:BP	protein kinase A signaling	18092
query_1	TRUE	0.00264927	52	2716	19	0.00699558	0.365385	GO:0050982	GO:BP	detection of mechanical stimulus	18092
query_1	TRUE	0.00264927	148	2716	40	0.0147275	0.27027	GO:0033135	GO:BP	regulation of peptidyl-serine phosphorylation	18092
query_1	TRUE	0.00264927	792	2716	157	0.0578056	0.198232	GO:0007420	GO:BP	brain development	18092
query_1	TRUE	0.00264927	40	2716	16	0.00589102	0.4	GO:0030501	GO:BP	positive regulation of bone mineralization	18092
query_1	TRUE	0.00268484	158	2716	42	0.0154639	0.265823	GO:0048754	GO:BP	branching morphogenesis of an epithelial tube	18092
query_1	TRUE	0.00269117	48	2716	18	0.00662739	0.375	GO:0070169	GO:BP	positive regulation of biomineral tissue development	18092
query_1	TRUE	0.0027081	1435	2716	265	0.09757	0.184669	GO:0007010	GO:BP	cytoskeleton organization	18092
query_1	TRUE	0.00276267	96	2716	29	0.0106775	0.302083	GO:0048704	GO:BP	embryonic skeletal system morphogenesis	18092
query_1	TRUE	0.00276267	219	2716	54	0.0198822	0.246575	GO:0007601	GO:BP	visual perception	18092
query_1	TRUE	0.00276267	219	2716	54	0.0198822	0.246575	GO:0034764	GO:BP	positive regulation of transmembrane transport	18092
query_1	TRUE	0.00276267	434	2716	94	0.0346097	0.21659	GO:0002790	GO:BP	peptide secretion	18092
query_1	TRUE	0.00276267	219	2716	54	0.0198822	0.246575	GO:0034767	GO:BP	positive regulation of ion transmembrane transport	18092
query_1	TRUE	0.00279012	78	2716	25	0.00920471	0.320513	GO:0048844	GO:BP	artery morphogenesis	18092
query_1	TRUE	0.00285598	22	2716	11	0.00405007	0.5	GO:0086012	GO:BP	membrane depolarization during cardiac muscle cell action potential	18092
query_1	TRUE	0.00303816	402	2716	88	0.0324006	0.218905	GO:0071692	GO:BP	protein localization to extracellular region	18092
query_1	TRUE	0.00311136	106	2716	31	0.0114138	0.292453	GO:0046545	GO:BP	development of primary female sexual characteristics	18092
query_1	TRUE	0.00311136	106	2716	31	0.0114138	0.292453	GO:0097722	GO:BP	sperm motility	18092
query_1	TRUE	0.00311136	353	2716	79	0.0290869	0.223796	GO:0043271	GO:BP	negative regulation of ion transport	18092
query_1	TRUE	0.00311136	106	2716	31	0.0114138	0.292453	GO:0030317	GO:BP	flagellated sperm motility	18092
query_1	TRUE	0.00314029	10	2716	7	0.00257732	0.7	GO:0001993	GO:BP	regulation of systemic arterial blood pressure by norepinephrine-epinephrine	18092
query_1	TRUE	0.00320937	33	2716	14	0.00515464	0.424242	GO:0048730	GO:BP	epidermis morphogenesis	18092
query_1	TRUE	0.00320937	33	2716	14	0.00515464	0.424242	GO:0042759	GO:BP	long-chain fatty acid biosynthetic process	18092
query_1	TRUE	0.00323854	611	2716	125	0.0460236	0.204583	GO:0030031	GO:BP	cell projection assembly	18092
query_1	TRUE	0.00326738	97	2716	29	0.0106775	0.298969	GO:0051591	GO:BP	response to cAMP	18092
query_1	TRUE	0.00330097	19	2716	10	0.00368189	0.526316	GO:0036158	GO:BP	outer dynein arm assembly	18092
query_1	TRUE	0.00336496	53	2716	19	0.00699558	0.358491	GO:0099054	GO:BP	presynapse assembly	18092
query_1	TRUE	0.00341902	37	2716	15	0.00552283	0.405405	GO:0070286	GO:BP	axonemal dynein complex assembly	18092
query_1	TRUE	0.0034704	49	2716	18	0.00662739	0.367347	GO:0048546	GO:BP	digestive tract morphogenesis	18092
query_1	TRUE	0.0034704	242	2716	58	0.0213549	0.239669	GO:0001649	GO:BP	osteoblast differentiation	18092
query_1	TRUE	0.0035622	26	2716	12	0.00441826	0.461538	GO:0021952	GO:BP	central nervous system projection neuron axonogenesis	18092
query_1	TRUE	0.0035622	306	2716	70	0.0257732	0.228758	GO:0030216	GO:BP	keratinocyte differentiation	18092
query_1	TRUE	0.0035622	471	2716	100	0.0368189	0.212314	GO:0050673	GO:BP	epithelial cell proliferation	18092
query_1	TRUE	0.0035622	26	2716	12	0.00441826	0.461538	GO:0010738	GO:BP	regulation of protein kinase A signaling	18092
query_1	TRUE	0.00361497	1016	2716	194	0.0714286	0.190945	GO:0030334	GO:BP	regulation of cell migration	18092
query_1	TRUE	0.00364372	201	2716	50	0.0184094	0.248756	GO:0048017	GO:BP	inositol lipid-mediated signaling	18092
query_1	TRUE	0.00369583	196	2716	49	0.0180412	0.25	GO:0035265	GO:BP	organ growth	18092
query_1	TRUE	0.00405979	89	2716	27	0.00994109	0.303371	GO:0050886	GO:BP	endocrine process	18092
query_1	TRUE	0.00408448	340	2716	76	0.0279823	0.223529	GO:0060562	GO:BP	epithelial tube morphogenesis	18092
query_1	TRUE	0.00418606	197	2716	49	0.0180412	0.248731	GO:0048015	GO:BP	phosphatidylinositol-mediated signaling	18092
query_1	TRUE	0.00425044	223	2716	54	0.0198822	0.242152	GO:0010810	GO:BP	regulation of cell-substrate adhesion	18092
query_1	TRUE	0.00442778	1020	2716	194	0.0714286	0.190196	GO:0003006	GO:BP	developmental process involved in reproduction	18092
query_1	TRUE	0.00443307	937	2716	180	0.0662739	0.192102	GO:0033993	GO:BP	response to lipid	18092
query_1	TRUE	0.00450158	50	2716	18	0.00662739	0.36	GO:0045778	GO:BP	positive regulation of ossification	18092
query_1	TRUE	0.00450158	85	2716	26	0.0095729	0.305882	GO:0071277	GO:BP	cellular response to calcium ion	18092
query_1	TRUE	0.00450158	50	2716	18	0.00662739	0.36	GO:0043268	GO:BP	positive regulation of potassium ion transport	18092
query_1	TRUE	0.00452694	76	2716	24	0.00883652	0.315789	GO:0061045	GO:BP	negative regulation of wound healing	18092
query_1	TRUE	0.00452694	76	2716	24	0.00883652	0.315789	GO:0086001	GO:BP	cardiac muscle cell action potential	18092
query_1	TRUE	0.00461308	358	2716	79	0.0290869	0.22067	GO:0048638	GO:BP	regulation of developmental growth	18092
query_1	TRUE	0.00461308	944	2716	181	0.0666421	0.191737	GO:0042327	GO:BP	positive regulation of phosphorylation	18092
query_1	TRUE	0.00461308	46	2716	17	0.0062592	0.369565	GO:0045214	GO:BP	sarcomere organization	18092
query_1	TRUE	0.00461308	38	2716	15	0.00552283	0.394737	GO:0006858	GO:BP	extracellular transport	18092
query_1	TRUE	0.00461308	46	2716	17	0.0062592	0.369565	GO:0017144	GO:BP	drug metabolic process	18092
query_1	TRUE	0.00478358	739	2716	146	0.0537555	0.197564	GO:0097435	GO:BP	supramolecular fiber organization	18092
query_1	TRUE	0.00478422	104	2716	30	0.0110457	0.288462	GO:0015837	GO:BP	amine transport	18092
query_1	TRUE	0.00488649	1172	2716	219	0.0806333	0.18686	GO:0051704	GO:BP	multi-organism process	18092
query_1	TRUE	0.00488649	1118	2716	210	0.0773196	0.187835	GO:0040012	GO:BP	regulation of locomotion	18092
query_1	TRUE	0.00500058	163	2716	42	0.0154639	0.257669	GO:0007338	GO:BP	single fertilization	18092
query_1	TRUE	0.00517477	8	2716	6	0.00220913	0.75	GO:0060638	GO:BP	mesenchymal-epithelial cell signaling	18092
query_1	TRUE	0.00517477	8	2716	6	0.00220913	0.75	GO:0061438	GO:BP	renal system vasculature morphogenesis	18092
query_1	TRUE	0.00517477	8	2716	6	0.00220913	0.75	GO:0061439	GO:BP	kidney vasculature morphogenesis	18092
query_1	TRUE	0.0051815	573	2716	117	0.0430781	0.204188	GO:1901615	GO:BP	organic hydroxy compound metabolic process	18092
query_1	TRUE	0.0051815	27	2716	12	0.00441826	0.444444	GO:0030318	GO:BP	melanocyte differentiation	18092
query_1	TRUE	0.0051815	27	2716	12	0.00441826	0.444444	GO:0001945	GO:BP	lymph vessel development	18092
query_1	TRUE	0.00519452	596	2716	121	0.0445508	0.20302	GO:0120031	GO:BP	plasma membrane bounded cell projection assembly	18092
query_1	TRUE	0.00523165	20	2716	10	0.00368189	0.5	GO:0043046	GO:BP	DNA methylation involved in gamete generation	18092
query_1	TRUE	0.00529265	86	2716	26	0.0095729	0.302326	GO:0014031	GO:BP	mesenchymal cell development	18092
query_1	TRUE	0.00535627	55	2716	19	0.00699558	0.345455	GO:0038084	GO:BP	vascular endothelial growth factor signaling pathway	18092
query_1	TRUE	0.00535627	55	2716	19	0.00699558	0.345455	GO:0007215	GO:BP	glutamate receptor signaling pathway	18092
query_1	TRUE	0.00546431	129	2716	35	0.0128866	0.271318	GO:0007613	GO:BP	memory	18092
query_1	TRUE	0.0054883	174	2716	44	0.0162003	0.252874	GO:0071772	GO:BP	response to BMP	18092
query_1	TRUE	0.0054883	174	2716	44	0.0162003	0.252874	GO:0071773	GO:BP	cellular response to BMP stimulus	18092
query_1	TRUE	0.00552411	105	2716	30	0.0110457	0.285714	GO:0060840	GO:BP	artery development	18092
query_1	TRUE	0.00552411	169	2716	43	0.0158321	0.254438	GO:0007519	GO:BP	skeletal muscle tissue development	18092
query_1	TRUE	0.00561548	91	2716	27	0.00994109	0.296703	GO:1903035	GO:BP	negative regulation of response to wounding	18092
query_1	TRUE	0.00596056	96	2716	28	0.0103093	0.291667	GO:1902476	GO:BP	chloride transmembrane transport	18092
query_1	TRUE	0.00596056	96	2716	28	0.0103093	0.291667	GO:0051952	GO:BP	regulation of amine transport	18092
query_1	TRUE	0.00599327	269	2716	62	0.0228277	0.230483	GO:0021537	GO:BP	telencephalon development	18092
query_1	TRUE	0.00602924	17	2716	9	0.0033137	0.529412	GO:0070593	GO:BP	dendrite self-avoidance	18092
query_1	TRUE	0.00602924	17	2716	9	0.0033137	0.529412	GO:0007158	GO:BP	neuron cell-cell adhesion	18092
query_1	TRUE	0.00602924	17	2716	9	0.0033137	0.529412	GO:0030299	GO:BP	intestinal cholesterol absorption	18092
query_1	TRUE	0.00613587	395	2716	85	0.031296	0.21519	GO:0035592	GO:BP	establishment of protein localization to extracellular region	18092
query_1	TRUE	0.00617537	3438	2716	582	0.214286	0.169284	GO:0070887	GO:BP	cellular response to chemical stimulus	18092
query_1	TRUE	0.00622038	340	2716	75	0.0276141	0.220588	GO:0015849	GO:BP	organic acid transport	18092
query_1	TRUE	0.00622038	60	2716	20	0.00736377	0.333333	GO:0048008	GO:BP	platelet-derived growth factor receptor signaling pathway	18092
query_1	TRUE	0.00622273	1076	2716	202	0.0743741	0.187732	GO:2000145	GO:BP	regulation of cell motility	18092
query_1	TRUE	0.00628841	201	2716	49	0.0180412	0.243781	GO:0019933	GO:BP	cAMP-mediated signaling	18092
query_1	TRUE	0.00628841	275	2716	63	0.0231959	0.229091	GO:0045165	GO:BP	cell fate commitment	18092
query_1	TRUE	0.00633319	1684	2716	302	0.111193	0.179335	GO:0016477	GO:BP	cell migration	18092
query_1	TRUE	0.0063501	669	2716	133	0.0489691	0.198804	GO:0031344	GO:BP	regulation of cell projection organization	18092
query_1	TRUE	0.00639805	24	2716	11	0.00405007	0.458333	GO:0033139	GO:BP	regulation of peptidyl-serine phosphorylation of STAT protein	18092
query_1	TRUE	0.00639805	78	2716	24	0.00883652	0.307692	GO:0003151	GO:BP	outflow tract morphogenesis	18092
query_1	TRUE	0.00645827	407	2716	87	0.0320324	0.213759	GO:0006631	GO:BP	fatty acid metabolic process	18092
query_1	TRUE	0.00656779	92	2716	27	0.00994109	0.293478	GO:0014033	GO:BP	neural crest cell differentiation	18092
query_1	TRUE	0.00661651	56	2716	19	0.00699558	0.339286	GO:0086065	GO:BP	cell communication involved in cardiac conduction	18092
query_1	TRUE	0.00662004	233	2716	55	0.0202504	0.236052	GO:0048705	GO:BP	skeletal system morphogenesis	18092
query_1	TRUE	0.00682497	176	2716	44	0.0162003	0.25	GO:0001659	GO:BP	temperature homeostasis	18092
query_1	TRUE	0.00701763	223	2716	53	0.019514	0.237668	GO:0030073	GO:BP	insulin secretion	18092
query_1	TRUE	0.00701763	65	2716	21	0.00773196	0.323077	GO:0051965	GO:BP	positive regulation of synapse assembly	18092
query_1	TRUE	0.00703395	161	2716	41	0.0150957	0.254658	GO:0014065	GO:BP	phosphatidylinositol 3-kinase signaling	18092
query_1	TRUE	0.00703395	161	2716	41	0.0150957	0.254658	GO:0048592	GO:BP	eye morphogenesis	18092
query_1	TRUE	0.00704719	74	2716	23	0.00846834	0.310811	GO:0050805	GO:BP	negative regulation of synaptic transmission	18092
query_1	TRUE	0.00710107	151	2716	39	0.0143594	0.258278	GO:1904064	GO:BP	positive regulation of cation transmembrane transport	18092
query_1	TRUE	0.00742265	107	2716	30	0.0110457	0.280374	GO:0003073	GO:BP	regulation of systemic arterial blood pressure	18092
query_1	TRUE	0.00742265	48	2716	17	0.0062592	0.354167	GO:0001754	GO:BP	eye photoreceptor cell differentiation	18092
query_1	TRUE	0.0074503	277	2716	63	0.0231959	0.227437	GO:0015850	GO:BP	organic hydroxy compound transport	18092
query_1	TRUE	0.00758145	288	2716	65	0.0239323	0.225694	GO:0007548	GO:BP	sex differentiation	18092
query_1	TRUE	0.00766698	6	2716	5	0.00184094	0.833333	GO:0035931	GO:BP	mineralocorticoid secretion	18092
query_1	TRUE	0.00766698	6	2716	5	0.00184094	0.833333	GO:0048752	GO:BP	semicircular canal morphogenesis	18092
query_1	TRUE	0.00766698	6	2716	5	0.00184094	0.833333	GO:2000858	GO:BP	regulation of aldosterone secretion	18092
query_1	TRUE	0.00766698	6	2716	5	0.00184094	0.833333	GO:2000855	GO:BP	regulation of mineralocorticoid secretion	18092
query_1	TRUE	0.00766698	6	2716	5	0.00184094	0.833333	GO:0035932	GO:BP	aldosterone secretion	18092
query_1	TRUE	0.00766698	224	2716	53	0.019514	0.236607	GO:0071241	GO:BP	cellular response to inorganic substance	18092
query_1	TRUE	0.00767968	696	2716	137	0.0504418	0.196839	GO:0043270	GO:BP	positive regulation of ion transport	18092
query_1	TRUE	0.00768477	117	2716	32	0.011782	0.273504	GO:0051588	GO:BP	regulation of neurotransmitter transport	18092
query_1	TRUE	0.00772864	167	2716	42	0.0154639	0.251497	GO:0060402	GO:BP	calcium ion transport into cytosol	18092
query_1	TRUE	0.00772864	167	2716	42	0.0154639	0.251497	GO:1903034	GO:BP	regulation of response to wounding	18092
query_1	TRUE	0.00778595	122	2716	33	0.0121502	0.270492	GO:0055002	GO:BP	striated muscle cell development	18092
query_1	TRUE	0.00779783	162	2716	41	0.0150957	0.253086	GO:0007286	GO:BP	spermatid development	18092
query_1	TRUE	0.00785033	127	2716	34	0.0125184	0.267717	GO:0002576	GO:BP	platelet degranulation	18092
query_1	TRUE	0.00785033	410	2716	87	0.0320324	0.212195	GO:0050678	GO:BP	regulation of epithelial cell proliferation	18092
query_1	TRUE	0.00809574	188	2716	46	0.0169367	0.244681	GO:0055001	GO:BP	muscle cell development	18092
query_1	TRUE	0.0082014	103	2716	29	0.0106775	0.281553	GO:0007200	GO:BP	phospholipase C-activating G protein-coupled receptor signaling pathway	18092
query_1	TRUE	0.0082014	103	2716	29	0.0106775	0.281553	GO:0046928	GO:BP	regulation of neurotransmitter secretion	18092
query_1	TRUE	0.0082014	209	2716	50	0.0184094	0.239234	GO:1901888	GO:BP	regulation of cell junction assembly	18092
query_1	TRUE	0.008296	394	2716	84	0.0309278	0.213198	GO:0009306	GO:BP	protein secretion	18092
query_1	TRUE	0.00841067	576	2716	116	0.0427099	0.201389	GO:0002009	GO:BP	morphogenesis of an epithelium	18092
query_1	TRUE	0.00841067	553	2716	112	0.0412371	0.202532	GO:1901652	GO:BP	response to peptide	18092
query_1	TRUE	0.00863679	168	2716	42	0.0154639	0.25	GO:0048515	GO:BP	spermatid differentiation	18092
query_1	TRUE	0.00867126	236	2716	55	0.0202504	0.233051	GO:0007160	GO:BP	cell-matrix adhesion	18092
query_1	TRUE	0.00876829	652	2716	129	0.0474963	0.197853	GO:0120035	GO:BP	regulation of plasma membrane bounded cell projection organization	18092
query_1	TRUE	0.0087787	194	2716	47	0.0173049	0.242268	GO:0015718	GO:BP	monocarboxylic acid transport	18092
query_1	TRUE	0.00896353	80	2716	24	0.00883652	0.3	GO:0007422	GO:BP	peripheral nervous system development	18092
query_1	TRUE	0.00908927	894	2716	170	0.062592	0.190157	GO:0019953	GO:BP	sexual reproduction	18092
query_1	TRUE	0.0092339	49	2716	17	0.0062592	0.346939	GO:0007157	GO:BP	heterophilic cell-cell adhesion via plasma membrane cell adhesion molecules	18092
query_1	TRUE	0.0092339	49	2716	17	0.0062592	0.346939	GO:0086009	GO:BP	membrane repolarization	18092
query_1	TRUE	0.00927534	4	2716	4	0.00147275	1	GO:0060665	GO:BP	regulation of branching involved in salivary gland morphogenesis by mesenchymal-epithelial signaling	18092
query_1	TRUE	0.00927534	4	2716	4	0.00147275	1	GO:0032431	GO:BP	activation of phospholipase A2 activity	18092
query_1	TRUE	0.00927534	4	2716	4	0.00147275	1	GO:0018916	GO:BP	nitrobenzene metabolic process	18092
query_1	TRUE	0.00927694	1062	2716	198	0.0729013	0.186441	GO:0022603	GO:BP	regulation of anatomical structure morphogenesis	18092
query_1	TRUE	0.00929367	18	2716	9	0.0033137	0.5	GO:0034587	GO:BP	piRNA metabolic process	18092
query_1	TRUE	0.00929367	18	2716	9	0.0033137	0.5	GO:0042448	GO:BP	progesterone metabolic process	18092
query_1	TRUE	0.00938247	221	2716	52	0.0191458	0.235294	GO:0050679	GO:BP	positive regulation of epithelial cell proliferation	18092
query_1	TRUE	0.00941983	85	2716	25	0.00920471	0.294118	GO:0021954	GO:BP	central nervous system neuron development	18092
query_1	TRUE	0.00956802	169	2716	42	0.0154639	0.248521	GO:0001764	GO:BP	neuron migration	18092
query_1	TRUE	0.00965488	1009	2716	189	0.0695876	0.187314	GO:0019725	GO:BP	cellular homeostasis	18092
query_1	TRUE	0.00980394	29	2716	12	0.00441826	0.413793	GO:0031069	GO:BP	hair follicle morphogenesis	18092
query_1	TRUE	0.00980394	29	2716	12	0.00441826	0.413793	GO:0001964	GO:BP	startle response	18092
query_1	TRUE	0.00981898	114	2716	31	0.0114138	0.27193	GO:0001676	GO:BP	long-chain fatty acid metabolic process	18092
query_1	TRUE	0.00984682	76	2716	23	0.00846834	0.302632	GO:0086003	GO:BP	cardiac muscle cell contraction	18092
query_1	TRUE	0.0098633	908	2716	172	0.0633284	0.189427	GO:0044070	GO:BP	regulation of anion transport	18092
query_1	TRUE	0.00994798	41	2716	15	0.00552283	0.365854	GO:0001941	GO:BP	postsynaptic membrane organization	18092
query_1	TRUE	0.00994798	41	2716	15	0.00552283	0.365854	GO:0009187	GO:BP	cyclic nucleotide metabolic process	18092
query_1	TRUE	0.0100017	129	2716	34	0.0125184	0.263566	GO:0022612	GO:BP	gland morphogenesis	18092
query_1	TRUE	0.0100017	67	2716	21	0.00773196	0.313433	GO:0048645	GO:BP	animal organ formation	18092
query_1	TRUE	0.0100017	206	2716	49	0.0180412	0.237864	GO:0045664	GO:BP	regulation of neuron differentiation	18092
query_1	TRUE	0.0100017	185	2716	45	0.0165685	0.243243	GO:0051897	GO:BP	positive regulation of protein kinase B signaling	18092
query_1	TRUE	0.0100017	33	2716	13	0.00478645	0.393939	GO:0034369	GO:BP	plasma lipoprotein particle remodeling	18092
query_1	TRUE	0.0100017	33	2716	13	0.00478645	0.393939	GO:0034368	GO:BP	protein-lipid complex remodeling	18092
query_1	TRUE	0.0100017	33	2716	13	0.00478645	0.393939	GO:0048566	GO:BP	embryonic digestive tract development	18092
query_1	TRUE	0.0100017	33	2716	13	0.00478645	0.393939	GO:0099068	GO:BP	postsynapse assembly	18092
query_1	TRUE	0.0100264	37	2716	14	0.00515464	0.378378	GO:0035137	GO:BP	hindlimb morphogenesis	18092
query_1	TRUE	0.0100538	414	2716	87	0.0320324	0.210145	GO:0044782	GO:BP	cilium organization	18092
query_1	TRUE	0.0100721	95	2716	27	0.00994109	0.284211	GO:0060993	GO:BP	kidney morphogenesis	18092
query_1	TRUE	0.0100721	180	2716	44	0.0162003	0.244444	GO:0060538	GO:BP	skeletal muscle organ development	18092
query_1	TRUE	0.0101941	403	2716	85	0.031296	0.210918	GO:0042692	GO:BP	muscle cell differentiation	18092
query_1	TRUE	0.0101941	201	2716	48	0.017673	0.238806	GO:0051216	GO:BP	cartilage development	18092
query_1	TRUE	0.0103037	364	2716	78	0.0287187	0.214286	GO:0031346	GO:BP	positive regulation of cell projection organization	18092
query_1	TRUE	0.0105075	381	2716	81	0.0298233	0.212598	GO:0051271	GO:BP	negative regulation of cellular component movement	18092
query_1	TRUE	0.0107456	72	2716	22	0.00810015	0.305556	GO:0045669	GO:BP	positive regulation of osteoblast differentiation	18092
query_1	TRUE	0.0109087	337	2716	73	0.0268778	0.216617	GO:0008202	GO:BP	steroid metabolic process	18092
query_1	TRUE	0.0109087	9	2716	6	0.00220913	0.666667	GO:0019227	GO:BP	neuronal action potential propagation	18092
query_1	TRUE	0.0109087	9	2716	6	0.00220913	0.666667	GO:1990504	GO:BP	dense core granule exocytosis	18092
query_1	TRUE	0.0109087	9	2716	6	0.00220913	0.666667	GO:0098870	GO:BP	action potential propagation	18092
query_1	TRUE	0.0110839	223	2716	52	0.0191458	0.233184	GO:0009612	GO:BP	response to mechanical stimulus	18092
query_1	TRUE	0.0111924	181	2716	44	0.0162003	0.243094	GO:0048469	GO:BP	cell maturation	18092
query_1	TRUE	0.0112076	50	2716	17	0.0062592	0.34	GO:0008038	GO:BP	neuron recognition	18092
query_1	TRUE	0.0112076	130	2716	34	0.0125184	0.261538	GO:0048706	GO:BP	embryonic skeletal system development	18092
query_1	TRUE	0.0113405	3242	2716	547	0.201399	0.168723	GO:0007166	GO:BP	cell surface receptor signaling pathway	18092
query_1	TRUE	0.0114394	12	2716	7	0.00257732	0.583333	GO:0006069	GO:BP	ethanol oxidation	18092
query_1	TRUE	0.0116253	171	2716	42	0.0154639	0.245614	GO:0015698	GO:BP	inorganic anion transport	18092
query_1	TRUE	0.0118409	59	2716	19	0.00699558	0.322034	GO:0001658	GO:BP	branching involved in ureteric bud morphogenesis	18092
query_1	TRUE	0.0118468	68	2716	21	0.00773196	0.308824	GO:0050918	GO:BP	positive chemotaxis	18092
query_1	TRUE	0.0120169	161	2716	40	0.0147275	0.248447	GO:0030509	GO:BP	BMP signaling pathway	18092
query_1	TRUE	0.0120169	101	2716	28	0.0103093	0.277228	GO:0008585	GO:BP	female gonad development	18092
query_1	TRUE	0.0121205	82	2716	24	0.00883652	0.292683	GO:0014032	GO:BP	neural crest cell development	18092
query_1	TRUE	0.0124369	26	2716	11	0.00405007	0.423077	GO:0050927	GO:BP	positive regulation of positive chemotaxis	18092
query_1	TRUE	0.0124763	111	2716	30	0.0110457	0.27027	GO:0033138	GO:BP	positive regulation of peptidyl-serine phosphorylation	18092
query_1	TRUE	0.0127569	126	2716	33	0.0121502	0.261905	GO:0016079	GO:BP	synaptic vesicle exocytosis	18092
query_1	TRUE	0.0129146	55	2716	18	0.00662739	0.327273	GO:0045668	GO:BP	negative regulation of osteoblast differentiation	18092
query_1	TRUE	0.0129196	230	2716	53	0.019514	0.230435	GO:0050803	GO:BP	regulation of synapse structure or activity	18092
query_1	TRUE	0.0130278	855	2716	162	0.0596465	0.189474	GO:0001934	GO:BP	positive regulation of protein phosphorylation	18092
query_1	TRUE	0.013074	193	2716	46	0.0169367	0.238342	GO:0048639	GO:BP	positive regulation of developmental growth	18092
query_1	TRUE	0.013074	64	2716	20	0.00736377	0.3125	GO:0046622	GO:BP	positive regulation of organ growth	18092
query_1	TRUE	0.0131757	34	2716	13	0.00478645	0.382353	GO:0007202	GO:BP	activation of phospholipase C activity	18092
query_1	TRUE	0.0131757	34	2716	13	0.00478645	0.382353	GO:0046320	GO:BP	regulation of fatty acid oxidation	18092
query_1	TRUE	0.0135582	78	2716	23	0.00846834	0.294872	GO:0072028	GO:BP	nephron morphogenesis	18092
query_1	TRUE	0.0135582	78	2716	23	0.00846834	0.294872	GO:0061333	GO:BP	renal tubule morphogenesis	18092
query_1	TRUE	0.0136206	430	2716	89	0.0327688	0.206977	GO:0043588	GO:BP	skin development	18092
query_1	TRUE	0.0138515	19	2716	9	0.0033137	0.473684	GO:0098856	GO:BP	intestinal lipid absorption	18092
query_1	TRUE	0.0139194	51	2716	17	0.0062592	0.333333	GO:0051932	GO:BP	synaptic transmission, GABAergic	18092
query_1	TRUE	0.0140274	499	2716	101	0.037187	0.202405	GO:0001667	GO:BP	ameboidal-type cell migration	18092
query_1	TRUE	0.0141857	615	2716	121	0.0445508	0.196748	GO:0040017	GO:BP	positive regulation of locomotion	18092
query_1	TRUE	0.014349	313	2716	68	0.0250368	0.217252	GO:0048511	GO:BP	rhythmic process	18092
query_1	TRUE	0.0150448	47	2716	16	0.00589102	0.340426	GO:0120163	GO:BP	negative regulation of cold-induced thermogenesis	18092
query_1	TRUE	0.0152475	74	2716	22	0.00810015	0.297297	GO:0072078	GO:BP	nephron tubule morphogenesis	18092
query_1	TRUE	0.0153188	158	2716	39	0.0143594	0.246835	GO:0007612	GO:BP	learning	18092
query_1	TRUE	0.0153347	466	2716	95	0.0349779	0.203863	GO:0043434	GO:BP	response to peptide hormone	18092
query_1	TRUE	0.0155215	3459	2716	579	0.213181	0.167389	GO:0010033	GO:BP	response to organic substance	18092
query_1	TRUE	0.0158277	65	2716	20	0.00736377	0.307692	GO:0046530	GO:BP	photoreceptor cell differentiation	18092
query_1	TRUE	0.0158395	56	2716	18	0.00662739	0.321429	GO:0071825	GO:BP	protein-lipid complex subunit organization	18092
query_1	TRUE	0.0159454	404	2716	84	0.0309278	0.207921	GO:0040013	GO:BP	negative regulation of locomotion	18092
query_1	TRUE	0.0159503	143	2716	36	0.0132548	0.251748	GO:0006720	GO:BP	isoprenoid metabolic process	18092
query_1	TRUE	0.0159503	43	2716	15	0.00552283	0.348837	GO:1901381	GO:BP	positive regulation of potassium ion transmembrane transport	18092
query_1	TRUE	0.0162129	108	2716	29	0.0106775	0.268519	GO:0010522	GO:BP	regulation of calcium ion transport into cytosol	18092
query_1	TRUE	0.0162592	133	2716	34	0.0125184	0.255639	GO:0014066	GO:BP	regulation of phosphatidylinositol 3-kinase signaling	18092
query_1	TRUE	0.0167402	164	2716	40	0.0147275	0.243902	GO:1902904	GO:BP	negative regulation of supramolecular fiber organization	18092
query_1	TRUE	0.0168022	39	2716	14	0.00515464	0.358974	GO:0044060	GO:BP	regulation of endocrine process	18092
query_1	TRUE	0.0168388	16	2716	8	0.00294551	0.5	GO:2000846	GO:BP	regulation of corticosteroid hormone secretion	18092
query_1	TRUE	0.0168388	16	2716	8	0.00294551	0.5	GO:0050872	GO:BP	white fat cell differentiation	18092
query_1	TRUE	0.0168388	16	2716	8	0.00294551	0.5	GO:0035864	GO:BP	response to potassium ion	18092
query_1	TRUE	0.0170584	879	2716	165	0.0607511	0.187713	GO:0048609	GO:BP	multicellular organismal reproductive process	18092
query_1	TRUE	0.0170706	27	2716	11	0.00405007	0.407407	GO:0045932	GO:BP	negative regulation of muscle contraction	18092
query_1	TRUE	0.0170706	27	2716	11	0.00405007	0.407407	GO:0050926	GO:BP	regulation of positive chemotaxis	18092
query_1	TRUE	0.0170706	27	2716	11	0.00405007	0.407407	GO:0060314	GO:BP	regulation of ryanodine-sensitive calcium-release channel activity	18092
query_1	TRUE	0.0171431	35	2716	13	0.00478645	0.371429	GO:0034367	GO:BP	protein-containing complex remodeling	18092
query_1	TRUE	0.0171431	35	2716	13	0.00478645	0.371429	GO:0032232	GO:BP	negative regulation of actin filament bundle assembly	18092
query_1	TRUE	0.0171431	35	2716	13	0.00478645	0.371429	GO:0035633	GO:BP	maintenance of blood-brain barrier	18092
query_1	TRUE	0.0171431	35	2716	13	0.00478645	0.371429	GO:0009954	GO:BP	proximal/distal pattern formation	18092
query_1	TRUE	0.0171431	89	2716	25	0.00920471	0.280899	GO:1901019	GO:BP	regulation of calcium ion transmembrane transporter activity	18092
query_1	TRUE	0.0172047	61	2716	19	0.00699558	0.311475	GO:0022029	GO:BP	telencephalon cell migration	18092
query_1	TRUE	0.0172047	578	2716	114	0.0419735	0.197232	GO:0030335	GO:BP	positive regulation of cell migration	18092
query_1	TRUE	0.0172264	31	2716	12	0.00441826	0.387097	GO:0019934	GO:BP	cGMP-mediated signaling	18092
query_1	TRUE	0.0172264	31	2716	12	0.00441826	0.387097	GO:0098664	GO:BP	G protein-coupled serotonin receptor signaling pathway	18092
query_1	TRUE	0.0172264	31	2716	12	0.00441826	0.387097	GO:0086019	GO:BP	cell-cell signaling involved in cardiac conduction	18092
query_1	TRUE	0.0172295	288	2716	63	0.0231959	0.21875	GO:0110053	GO:BP	regulation of actin filament organization	18092
query_1	TRUE	0.0174627	239	2716	54	0.0198822	0.225941	GO:0044706	GO:BP	multi-multicellular organism process	18092
query_1	TRUE	0.0177397	372	2716	78	0.0287187	0.209677	GO:2000146	GO:BP	negative regulation of cell motility	18092
query_1	TRUE	0.0180355	134	2716	34	0.0125184	0.253731	GO:0061041	GO:BP	regulation of wound healing	18092
query_1	TRUE	0.0183241	899	2716	168	0.0618557	0.186874	GO:0032504	GO:BP	multicellular organism reproduction	18092
query_1	TRUE	0.0183241	119	2716	31	0.0114138	0.260504	GO:0098661	GO:BP	inorganic anion transmembrane transport	18092
query_1	TRUE	0.0183241	114	2716	30	0.0110457	0.263158	GO:0099565	GO:BP	chemical synaptic transmission, postsynaptic	18092
query_1	TRUE	0.0185594	66	2716	20	0.00736377	0.30303	GO:0072171	GO:BP	mesonephric tubule morphogenesis	18092
query_1	TRUE	0.018625	160	2716	39	0.0143594	0.24375	GO:1903169	GO:BP	regulation of calcium ion transmembrane transport	18092
query_1	TRUE	0.018625	7	2716	5	0.00184094	0.714286	GO:0032430	GO:BP	positive regulation of phospholipase A2 activity	18092
query_1	TRUE	0.018625	7	2716	5	0.00184094	0.714286	GO:0003321	GO:BP	positive regulation of blood pressure by epinephrine-norepinephrine	18092
query_1	TRUE	0.018625	7	2716	5	0.00184094	0.714286	GO:0060592	GO:BP	mammary gland formation	18092
query_1	TRUE	0.018625	7	2716	5	0.00184094	0.714286	GO:0035634	GO:BP	response to stilbenoid	18092
query_1	TRUE	0.018625	7	2716	5	0.00184094	0.714286	GO:0071455	GO:BP	cellular response to hyperoxia	18092
query_1	TRUE	0.0186749	1478	2716	263	0.0968336	0.177943	GO:0051240	GO:BP	positive regulation of multicellular organismal process	18092
query_1	TRUE	0.0188604	197	2716	46	0.0169367	0.233503	GO:0050731	GO:BP	positive regulation of peptidyl-tyrosine phosphorylation	18092
query_1	TRUE	0.0191026	251	2716	56	0.0206186	0.223108	GO:0033002	GO:BP	muscle cell proliferation	18092
query_1	TRUE	0.0191324	13	2716	7	0.00257732	0.538462	GO:1904590	GO:BP	negative regulation of protein import	18092
query_1	TRUE	0.0191324	13	2716	7	0.00257732	0.538462	GO:0007494	GO:BP	midgut development	18092
query_1	TRUE	0.0191324	13	2716	7	0.00257732	0.538462	GO:0042308	GO:BP	negative regulation of protein import into nucleus	18092
query_1	TRUE	0.0198915	301	2716	65	0.0239323	0.215947	GO:0051146	GO:BP	striated muscle cell differentiation	18092
query_1	TRUE	0.0199433	20	2716	9	0.0033137	0.45	GO:0019373	GO:BP	epoxygenase P450 pathway	18092
query_1	TRUE	0.0199433	20	2716	9	0.0033137	0.45	GO:0043116	GO:BP	negative regulation of vascular permeability	18092
query_1	TRUE	0.0202299	1016	2716	187	0.0688513	0.184055	GO:0040007	GO:BP	growth	18092
query_1	TRUE	0.0202646	130	2716	33	0.0121502	0.253846	GO:0003231	GO:BP	cardiac ventricle development	18092
query_1	TRUE	0.0202646	130	2716	33	0.0121502	0.253846	GO:0048593	GO:BP	camera-type eye morphogenesis	18092
query_1	TRUE	0.0203954	105	2716	28	0.0103093	0.266667	GO:0045666	GO:BP	positive regulation of neuron differentiation	18092
query_1	TRUE	0.0203954	125	2716	32	0.011782	0.256	GO:0051928	GO:BP	positive regulation of calcium ion transport	18092
query_1	TRUE	0.0203954	105	2716	28	0.0103093	0.266667	GO:0060079	GO:BP	excitatory postsynaptic potential	18092
query_1	TRUE	0.0204479	76	2716	22	0.00810015	0.289474	GO:0072088	GO:BP	nephron epithelium morphogenesis	18092
query_1	TRUE	0.0204479	53	2716	17	0.0062592	0.320755	GO:0072132	GO:BP	mesenchyme morphogenesis	18092
query_1	TRUE	0.0204479	110	2716	29	0.0106775	0.263636	GO:0002062	GO:BP	chondrocyte differentiation	18092
query_1	TRUE	0.0204569	10	2716	6	0.00220913	0.6	GO:0070344	GO:BP	regulation of fat cell proliferation	18092
query_1	TRUE	0.0204569	10	2716	6	0.00220913	0.6	GO:0070341	GO:BP	fat cell proliferation	18092
query_1	TRUE	0.0206064	40	2716	14	0.00515464	0.35	GO:0003091	GO:BP	renal water homeostasis	18092
query_1	TRUE	0.0212352	409	2716	84	0.0309278	0.205379	GO:1901653	GO:BP	cellular response to peptide	18092
query_1	TRUE	0.0212604	81	2716	23	0.00846834	0.283951	GO:0031016	GO:BP	pancreas development	18092
query_1	TRUE	0.0213171	600	2716	117	0.0430781	0.195	GO:2000147	GO:BP	positive regulation of cell motility	18092
query_1	TRUE	0.0216566	36	2716	13	0.00478645	0.361111	GO:0007210	GO:BP	serotonin receptor signaling pathway	18092
query_1	TRUE	0.0216566	36	2716	13	0.00478645	0.361111	GO:0021955	GO:BP	central nervous system neuron axonogenesis	18092
query_1	TRUE	0.0217903	188	2716	44	0.0162003	0.234043	GO:0060401	GO:BP	cytosolic calcium ion transport	18092
query_1	TRUE	0.0218744	86	2716	24	0.00883652	0.27907	GO:0048864	GO:BP	stem cell development	18092
query_1	TRUE	0.0220108	167	2716	40	0.0147275	0.239521	GO:0110148	GO:BP	biomineralization	18092
query_1	TRUE	0.0223076	32	2716	12	0.00441826	0.375	GO:0071711	GO:BP	basement membrane organization	18092
query_1	TRUE	0.0223244	28	2716	11	0.00405007	0.392857	GO:0042501	GO:BP	serine phosphorylation of STAT protein	18092
query_1	TRUE	0.0223244	28	2716	11	0.00405007	0.392857	GO:0010575	GO:BP	positive regulation of vascular endothelial growth factor production	18092
query_1	TRUE	0.0223244	28	2716	11	0.00405007	0.392857	GO:0051953	GO:BP	negative regulation of amine transport	18092
query_1	TRUE	0.0226677	613	2716	119	0.0438144	0.194127	GO:0051272	GO:BP	positive regulation of cellular component movement	18092
query_1	TRUE	0.0226756	96	2716	26	0.0095729	0.270833	GO:0110149	GO:BP	regulation of biomineralization	18092
query_1	TRUE	0.0228175	72	2716	21	0.00773196	0.291667	GO:0045600	GO:BP	positive regulation of fat cell differentiation	18092
query_1	TRUE	0.022829	237	2716	53	0.019514	0.223629	GO:0045137	GO:BP	development of primary sexual characteristics	18092
query_1	TRUE	0.0229497	178	2716	42	0.0154639	0.235955	GO:0048659	GO:BP	smooth muscle cell proliferation	18092
query_1	TRUE	0.0229915	116	2716	30	0.0110457	0.258621	GO:0001938	GO:BP	positive regulation of endothelial cell proliferation	18092
query_1	TRUE	0.023464	152	2716	37	0.013623	0.243421	GO:0035107	GO:BP	appendage morphogenesis	18092
query_1	TRUE	0.023464	152	2716	37	0.013623	0.243421	GO:0035108	GO:BP	limb morphogenesis	18092
query_1	TRUE	0.0237886	77	2716	22	0.00810015	0.285714	GO:0050891	GO:BP	multicellular organismal water homeostasis	18092
query_1	TRUE	0.0240185	45	2716	15	0.00552283	0.333333	GO:0042596	GO:BP	fear response	18092
query_1	TRUE	0.0245528	400	2716	82	0.0301915	0.205	GO:0015711	GO:BP	organic anion transport	18092
query_1	TRUE	0.024557	184	2716	43	0.0158321	0.233696	GO:0048736	GO:BP	appendage development	18092
query_1	TRUE	0.024557	184	2716	43	0.0158321	0.233696	GO:0060173	GO:BP	limb development	18092
query_1	TRUE	0.0245882	54	2716	17	0.0062592	0.314815	GO:2000649	GO:BP	regulation of sodium ion transmembrane transporter activity	18092
query_1	TRUE	0.0245882	17	2716	8	0.00294551	0.470588	GO:0035930	GO:BP	corticosteroid hormone secretion	18092
query_1	TRUE	0.0245882	17	2716	8	0.00294551	0.470588	GO:0045986	GO:BP	negative regulation of smooth muscle contraction	18092
query_1	TRUE	0.0245882	17	2716	8	0.00294551	0.470588	GO:0046068	GO:BP	cGMP metabolic process	18092
query_1	TRUE	0.0246486	662	2716	127	0.0467599	0.191843	GO:0032787	GO:BP	monocarboxylic acid metabolic process	18092
query_1	TRUE	0.0247907	249	2716	55	0.0202504	0.220884	GO:0009636	GO:BP	response to toxic substance	18092
query_1	TRUE	0.0250663	87	2716	24	0.00883652	0.275862	GO:0150104	GO:BP	transport across blood-brain barrier	18092
query_1	TRUE	0.0254087	68	2716	20	0.00736377	0.294118	GO:0034332	GO:BP	adherens junction organization	18092
query_1	TRUE	0.0254087	68	2716	20	0.00736377	0.294118	GO:0051926	GO:BP	negative regulation of calcium ion transport	18092
query_1	TRUE	0.0256599	41	2716	14	0.00515464	0.341463	GO:0035136	GO:BP	forelimb morphogenesis	18092
query_1	TRUE	0.0256599	122	2716	31	0.0114138	0.254098	GO:0006690	GO:BP	icosanoid metabolic process	18092
query_1	TRUE	0.025819	117	2716	30	0.0110457	0.25641	GO:0030278	GO:BP	regulation of ossification	18092
query_1	TRUE	0.025819	117	2716	30	0.0110457	0.25641	GO:0030282	GO:BP	bone mineralization	18092
query_1	TRUE	0.0259447	107	2716	28	0.0103093	0.261682	GO:0150115	GO:BP	cell-substrate junction organization	18092
query_1	TRUE	0.0259447	107	2716	28	0.0103093	0.261682	GO:0031532	GO:BP	actin cytoskeleton reorganization	18092
query_1	TRUE	0.0264608	148	2716	36	0.0132548	0.243243	GO:0045598	GO:BP	regulation of fat cell differentiation	18092
query_1	TRUE	0.0266862	356	2716	74	0.0272459	0.207865	GO:0030336	GO:BP	negative regulation of cell migration	18092
query_1	TRUE	0.0267814	250	2716	55	0.0202504	0.22	GO:0006813	GO:BP	potassium ion transport	18092
query_1	TRUE	0.0268418	50	2716	16	0.00589102	0.32	GO:0060986	GO:BP	endocrine hormone secretion	18092
query_1	TRUE	0.0271822	37	2716	13	0.00478645	0.351351	GO:1905606	GO:BP	regulation of presynapse assembly	18092
query_1	TRUE	0.0271822	37	2716	13	0.00478645	0.351351	GO:0032228	GO:BP	regulation of synaptic transmission, GABAergic	18092
query_1	TRUE	0.0271822	37	2716	13	0.00478645	0.351351	GO:0003016	GO:BP	respiratory system process	18092
query_1	TRUE	0.0276665	21	2716	9	0.0033137	0.428571	GO:0071625	GO:BP	vocalization behavior	18092
query_1	TRUE	0.0276665	21	2716	9	0.0033137	0.428571	GO:0072111	GO:BP	cell proliferation involved in kidney development	18092
query_1	TRUE	0.0276665	21	2716	9	0.0033137	0.428571	GO:0051412	GO:BP	response to corticosterone	18092
query_1	TRUE	0.0276665	21	2716	9	0.0033137	0.428571	GO:0036303	GO:BP	lymph vessel morphogenesis	18092
query_1	TRUE	0.0277065	256	2716	56	0.0206186	0.21875	GO:0042593	GO:BP	glucose homeostasis	18092
query_1	TRUE	0.0279609	1251	2716	224	0.0824742	0.179057	GO:1901701	GO:BP	cellular response to oxygen-containing compound	18092
query_1	TRUE	0.0282155	128	2716	32	0.011782	0.25	GO:0035113	GO:BP	embryonic appendage morphogenesis	18092
query_1	TRUE	0.0282155	128	2716	32	0.011782	0.25	GO:0030326	GO:BP	embryonic limb morphogenesis	18092
query_1	TRUE	0.0282155	64	2716	19	0.00699558	0.296875	GO:0021885	GO:BP	forebrain cell migration	18092
query_1	TRUE	0.0282626	33	2716	12	0.00441826	0.363636	GO:0070050	GO:BP	neuron cellular homeostasis	18092
query_1	TRUE	0.0282626	33	2716	12	0.00441826	0.363636	GO:0042573	GO:BP	retinoic acid metabolic process	18092
query_1	TRUE	0.0282626	218	2716	49	0.0180412	0.224771	GO:0045216	GO:BP	cell-cell junction organization	18092
query_1	TRUE	0.0285219	88	2716	24	0.00883652	0.272727	GO:0010232	GO:BP	vascular transport	18092
query_1	TRUE	0.0288536	449	2716	90	0.033137	0.200445	GO:0007015	GO:BP	actin filament organization	18092
query_1	TRUE	0.0288536	25	2716	10	0.00368189	0.4	GO:0097164	GO:BP	ammonium ion metabolic process	18092
query_1	TRUE	0.0288536	403	2716	82	0.0301915	0.203474	GO:0042493	GO:BP	response to drug	18092
query_1	TRUE	0.0288536	25	2716	10	0.00368189	0.4	GO:0010842	GO:BP	retina layer formation	18092
query_1	TRUE	0.0288885	29	2716	11	0.00405007	0.37931	GO:0007214	GO:BP	gamma-aminobutyric acid signaling pathway	18092
query_1	TRUE	0.0288885	113	2716	29	0.0106775	0.256637	GO:0018958	GO:BP	phenol-containing compound metabolic process	18092
query_1	TRUE	0.0289497	98	2716	26	0.0095729	0.265306	GO:0001708	GO:BP	cell fate specification	18092
query_1	TRUE	0.0289716	103	2716	27	0.00994109	0.262136	GO:1901655	GO:BP	cellular response to ketone	18092
query_1	TRUE	0.0289716	55	2716	17	0.0062592	0.309091	GO:0030834	GO:BP	regulation of actin filament depolymerization	18092
query_1	TRUE	0.0289897	513	2716	101	0.037187	0.196881	GO:0060284	GO:BP	regulation of cell development	18092
query_1	TRUE	0.0292917	69	2716	20	0.00736377	0.289855	GO:0048662	GO:BP	negative regulation of smooth muscle cell proliferation	18092
query_1	TRUE	0.0293216	5	2716	4	0.00147275	0.8	GO:0035564	GO:BP	regulation of kidney size	18092
query_1	TRUE	0.0293216	257	2716	56	0.0206186	0.217899	GO:0033500	GO:BP	carbohydrate homeostasis	18092
query_1	TRUE	0.0293216	5	2716	4	0.00147275	0.8	GO:0051414	GO:BP	response to cortisol	18092
query_1	TRUE	0.0293216	5	2716	4	0.00147275	0.8	GO:0046069	GO:BP	cGMP catabolic process	18092
query_1	TRUE	0.0293216	14	2716	7	0.00257732	0.5	GO:0007512	GO:BP	adult heart development	18092
query_1	TRUE	0.0293216	14	2716	7	0.00257732	0.5	GO:0072578	GO:BP	neurotransmitter-gated ion channel clustering	18092
query_1	TRUE	0.0293216	14	2716	7	0.00257732	0.5	GO:0038166	GO:BP	angiotensin-activated signaling pathway	18092
query_1	TRUE	0.0293216	5	2716	4	0.00147275	0.8	GO:0071205	GO:BP	protein localization to juxtaparanode region of axon	18092
query_1	TRUE	0.0293216	5	2716	4	0.00147275	0.8	GO:0090185	GO:BP	negative regulation of kidney development	18092
query_1	TRUE	0.0293216	5	2716	4	0.00147275	0.8	GO:0097114	GO:BP	NMDA glutamate receptor clustering	18092
query_1	TRUE	0.0293216	165	2716	39	0.0143594	0.236364	GO:0031214	GO:BP	biomineral tissue development	18092
query_1	TRUE	0.0293216	5	2716	4	0.00147275	0.8	GO:0060509	GO:BP	type I pneumocyte differentiation	18092
query_1	TRUE	0.030126	219	2716	49	0.0180412	0.223744	GO:0050807	GO:BP	regulation of synapse organization	18092
query_1	TRUE	0.0303629	176	2716	41	0.0150957	0.232955	GO:0048660	GO:BP	regulation of smooth muscle cell proliferation	18092
query_1	TRUE	0.030808	60	2716	18	0.00662739	0.3	GO:0019369	GO:BP	arachidonic acid metabolic process	18092
query_1	TRUE	0.030808	462	2716	92	0.0338733	0.199134	GO:0010975	GO:BP	regulation of neuron projection development	18092
query_1	TRUE	0.0309471	42	2716	14	0.00515464	0.333333	GO:0072210	GO:BP	metanephric nephron development	18092
query_1	TRUE	0.0309471	42	2716	14	0.00515464	0.333333	GO:0001990	GO:BP	regulation of systemic arterial blood pressure by hormone	18092
query_1	TRUE	0.031364	124	2716	31	0.0114138	0.25	GO:0042471	GO:BP	ear morphogenesis	18092
query_1	TRUE	0.0322114	114	2716	29	0.0106775	0.254386	GO:0050905	GO:BP	neuromuscular process	18092
query_1	TRUE	0.0324828	94	2716	25	0.00920471	0.265957	GO:0070167	GO:BP	regulation of biomineral tissue development	18092
query_1	TRUE	0.0324828	145	2716	35	0.0128866	0.241379	GO:0032355	GO:BP	response to estradiol	18092
query_1	TRUE	0.032546	800	2716	149	0.0548601	0.18625	GO:0008285	GO:BP	negative regulation of cell population proliferation	18092
query_1	TRUE	0.032546	65	2716	19	0.00699558	0.292308	GO:0060675	GO:BP	ureteric bud morphogenesis	18092
query_1	TRUE	0.0334095	38	2716	13	0.00478645	0.342105	GO:0099174	GO:BP	regulation of presynapse organization	18092
query_1	TRUE	0.0334095	38	2716	13	0.00478645	0.342105	GO:0051955	GO:BP	regulation of amino acid transport	18092
query_1	TRUE	0.034058	11	2716	6	0.00220913	0.545455	GO:0046549	GO:BP	retinal cone cell development	18092
query_1	TRUE	0.034058	11	2716	6	0.00220913	0.545455	GO:0042670	GO:BP	retinal cone cell differentiation	18092
query_1	TRUE	0.034058	11	2716	6	0.00220913	0.545455	GO:0035865	GO:BP	cellular response to potassium ion	18092
query_1	TRUE	0.034058	11	2716	6	0.00220913	0.545455	GO:0060287	GO:BP	epithelial cilium movement involved in determination of left/right asymmetry	18092
query_1	TRUE	0.034058	946	2716	173	0.0636966	0.182875	GO:0000165	GO:BP	MAPK cascade	18092
query_1	TRUE	0.034058	11	2716	6	0.00220913	0.545455	GO:0007191	GO:BP	adenylate cyclase-activating dopamine receptor signaling pathway	18092
query_1	TRUE	0.034253	56	2716	17	0.0062592	0.303571	GO:0001755	GO:BP	neural crest cell migration	18092
query_1	TRUE	0.0344211	130	2716	32	0.011782	0.246154	GO:0043500	GO:BP	muscle adaptation	18092
query_1	TRUE	0.0346933	18	2716	8	0.00294551	0.444444	GO:0061298	GO:BP	retina vasculature development in camera-type eye	18092
query_1	TRUE	0.0349962	75	2716	21	0.00773196	0.28	GO:0030500	GO:BP	regulation of bone mineralization	18092
query_1	TRUE	0.0353866	34	2716	12	0.00441826	0.352941	GO:0097106	GO:BP	postsynaptic density organization	18092
query_1	TRUE	0.0353866	34	2716	12	0.00441826	0.352941	GO:0019228	GO:BP	neuronal action potential	18092
query_1	TRUE	0.036133	8	2716	5	0.00184094	0.625	GO:0098700	GO:BP	neurotransmitter loading into synaptic vesicle	18092
query_1	TRUE	0.036133	8	2716	5	0.00184094	0.625	GO:0014866	GO:BP	skeletal myofibril assembly	18092
query_1	TRUE	0.036133	8	2716	5	0.00184094	0.625	GO:0001542	GO:BP	ovulation from ovarian follicle	18092
query_1	TRUE	0.036133	8	2716	5	0.00184094	0.625	GO:0048793	GO:BP	pronephros development	18092
query_1	TRUE	0.036347	110	2716	28	0.0103093	0.254545	GO:0032414	GO:BP	positive regulation of ion transmembrane transporter activity	18092
query_1	TRUE	0.036347	110	2716	28	0.0103093	0.254545	GO:0019233	GO:BP	sensory perception of pain	18092
query_1	TRUE	0.0366276	105	2716	27	0.00994109	0.257143	GO:0042472	GO:BP	inner ear morphogenesis	18092
query_1	TRUE	0.0367663	30	2716	11	0.00405007	0.366667	GO:0007263	GO:BP	nitric oxide mediated signal transduction	18092
query_1	TRUE	0.0367663	30	2716	11	0.00405007	0.366667	GO:0035640	GO:BP	exploration behavior	18092
query_1	TRUE	0.0367663	30	2716	11	0.00405007	0.366667	GO:0099560	GO:BP	synaptic membrane adhesion	18092
query_1	TRUE	0.0367663	227	2716	50	0.0184094	0.220264	GO:0072330	GO:BP	monocarboxylic acid biosynthetic process	18092
query_1	TRUE	0.0367663	930	2716	170	0.062592	0.182796	GO:0051050	GO:BP	positive regulation of transport	18092
query_1	TRUE	0.0369859	22	2716	9	0.0033137	0.409091	GO:0035929	GO:BP	steroid hormone secretion	18092
query_1	TRUE	0.0369859	189	2716	43	0.0158321	0.227513	GO:0001936	GO:BP	regulation of endothelial cell proliferation	18092
query_1	TRUE	0.0371969	157	2716	37	0.013623	0.235669	GO:0045834	GO:BP	positive regulation of lipid metabolic process	18092
query_1	TRUE	0.0375239	26	2716	10	0.00368189	0.384615	GO:0035235	GO:BP	ionotropic glutamate receptor signaling pathway	18092
query_1	TRUE	0.0377687	52	2716	16	0.00589102	0.307692	GO:0090102	GO:BP	cochlea development	18092
query_1	TRUE	0.0381149	233	2716	51	0.0187776	0.218884	GO:0048738	GO:BP	cardiac muscle tissue development	18092
query_1	TRUE	0.0381149	222	2716	49	0.0180412	0.220721	GO:0009952	GO:BP	anterior/posterior pattern specification	18092
query_1	TRUE	0.0391591	261	2716	56	0.0206186	0.214559	GO:0051896	GO:BP	regulation of protein kinase B signaling	18092
query_1	TRUE	0.0392671	71	2716	20	0.00736377	0.28169	GO:0061035	GO:BP	regulation of cartilage development	18092
query_1	TRUE	0.0394161	206	2716	46	0.0169367	0.223301	GO:0001935	GO:BP	endothelial cell proliferation	18092
query_1	TRUE	0.0406452	57	2716	17	0.0062592	0.298246	GO:0043113	GO:BP	receptor clustering	18092
query_1	TRUE	0.0406818	3	2716	3	0.00110457	1	GO:0010159	GO:BP	specification of animal organ position	18092
query_1	TRUE	0.0406818	3	2716	3	0.00110457	1	GO:0006210	GO:BP	thymine catabolic process	18092
query_1	TRUE	0.0406818	101	2716	26	0.0095729	0.257426	GO:0007044	GO:BP	cell-substrate junction assembly	18092
query_1	TRUE	0.0406818	3	2716	3	0.00110457	1	GO:0006208	GO:BP	pyrimidine nucleobase catabolic process	18092
query_1	TRUE	0.0406818	3	2716	3	0.00110457	1	GO:0006579	GO:BP	amino-acid betaine catabolic process	18092
query_1	TRUE	0.0406818	3	2716	3	0.00110457	1	GO:0072277	GO:BP	metanephric glomerular capillary formation	18092
query_1	TRUE	0.0406818	3	2716	3	0.00110457	1	GO:0055096	GO:BP	low-density lipoprotein particle mediated signaling	18092
query_1	TRUE	0.0406818	39	2716	13	0.00478645	0.333333	GO:0071709	GO:BP	membrane assembly	18092
query_1	TRUE	0.0406818	318	2716	66	0.0243004	0.207547	GO:0042063	GO:BP	gliogenesis	18092
query_1	TRUE	0.0406818	3	2716	3	0.00110457	1	GO:1904633	GO:BP	regulation of glomerular visceral epithelial cell apoptotic process	18092
query_1	TRUE	0.0406818	3	2716	3	0.00110457	1	GO:0072138	GO:BP	mesenchymal cell proliferation involved in ureteric bud development	18092
query_1	TRUE	0.0406818	3	2716	3	0.00110457	1	GO:0055095	GO:BP	lipoprotein particle mediated signaling	18092
query_1	TRUE	0.0406818	3	2716	3	0.00110457	1	GO:0072276	GO:BP	metanephric glomerulus vasculature morphogenesis	18092
query_1	TRUE	0.0406818	86	2716	23	0.00846834	0.267442	GO:0030104	GO:BP	water homeostasis	18092
query_1	TRUE	0.0406818	111	2716	28	0.0103093	0.252252	GO:0043266	GO:BP	regulation of potassium ion transport	18092
query_1	TRUE	0.0406818	3	2716	3	0.00110457	1	GO:0048807	GO:BP	female genitalia morphogenesis	18092
query_1	TRUE	0.0406818	3	2716	3	0.00110457	1	GO:0070350	GO:BP	regulation of white fat cell proliferation	18092
query_1	TRUE	0.0406818	3	2716	3	0.00110457	1	GO:1903210	GO:BP	glomerular visceral epithelial cell apoptotic process	18092
query_1	TRUE	0.0406818	3	2716	3	0.00110457	1	GO:0019859	GO:BP	thymine metabolic process	18092
query_1	TRUE	0.0406818	3	2716	3	0.00110457	1	GO:1904635	GO:BP	positive regulation of glomerular visceral epithelial cell apoptotic process	18092
query_1	TRUE	0.0406818	3	2716	3	0.00110457	1	GO:0072275	GO:BP	metanephric glomerulus morphogenesis	18092
query_1	TRUE	0.0406818	3	2716	3	0.00110457	1	GO:0070343	GO:BP	white fat cell proliferation	18092
query_1	TRUE	0.0408194	96	2716	25	0.00920471	0.260417	GO:0006942	GO:BP	regulation of striated muscle contraction	18092
query_1	TRUE	0.0410181	48	2716	15	0.00552283	0.3125	GO:0042551	GO:BP	neuron maturation	18092
query_1	TRUE	0.0410181	48	2716	15	0.00552283	0.3125	GO:0043330	GO:BP	response to exogenous dsRNA	18092
query_1	TRUE	0.0410181	48	2716	15	0.00552283	0.3125	GO:0060443	GO:BP	mammary gland morphogenesis	18092
query_1	TRUE	0.0414077	307	2716	64	0.0235641	0.208469	GO:0010720	GO:BP	positive regulation of cell development	18092
query_1	TRUE	0.0417433	387	2716	78	0.0287187	0.20155	GO:1902903	GO:BP	regulation of supramolecular fiber organization	18092
query_1	TRUE	0.0418886	240	2716	52	0.0191458	0.216667	GO:1903792	GO:BP	negative regulation of anion transport	18092
query_1	TRUE	0.0429548	15	2716	7	0.00257732	0.466667	GO:1904251	GO:BP	regulation of bile acid metabolic process	18092
query_1	TRUE	0.0434495	67	2716	19	0.00699558	0.283582	GO:0006940	GO:BP	regulation of smooth muscle contraction	18092
query_1	TRUE	0.0434495	35	2716	12	0.00441826	0.342857	GO:1901020	GO:BP	negative regulation of calcium ion transmembrane transporter activity	18092
query_1	TRUE	0.0434495	35	2716	12	0.00441826	0.342857	GO:0010464	GO:BP	regulation of mesenchymal cell proliferation	18092
query_1	TRUE	0.0434495	35	2716	12	0.00441826	0.342857	GO:0042462	GO:BP	eye photoreceptor cell development	18092
query_1	TRUE	0.0436385	235	2716	51	0.0187776	0.217021	GO:0010001	GO:BP	glial cell differentiation	18092
query_1	TRUE	0.0436994	143	2716	34	0.0125184	0.237762	GO:0007586	GO:BP	digestion	18092
query_1	TRUE	0.0436994	224	2716	49	0.0180412	0.21875	GO:0071805	GO:BP	potassium ion transmembrane transport	18092
query_1	TRUE	0.0446322	72	2716	20	0.00736377	0.277778	GO:0003208	GO:BP	cardiac ventricle morphogenesis	18092
query_1	TRUE	0.0447678	280	2716	59	0.0217231	0.210714	GO:0007281	GO:BP	germ cell development	18092
query_1	TRUE	0.0447678	11531	2716	1793	0.660162	0.155494	GO:0050794	GO:BP	regulation of cellular process	18092
query_1	TRUE	0.0447678	394	2716	79	0.0290869	0.200508	GO:0060271	GO:BP	cilium assembly	18092
query_1	TRUE	0.0452005	623	2716	118	0.0434462	0.189406	GO:0090087	GO:BP	regulation of peptide transport	18092
query_1	TRUE	0.0452372	107	2716	27	0.00994109	0.252336	GO:0051963	GO:BP	regulation of synapse assembly	18092
query_1	TRUE	0.045332	77	2716	21	0.00773196	0.272727	GO:2001259	GO:BP	positive regulation of cation channel activity	18092
query_1	TRUE	0.0455967	1472	2716	257	0.0946244	0.174592	GO:2000026	GO:BP	regulation of multicellular organismal development	18092
query_1	TRUE	0.0458148	82	2716	22	0.00810015	0.268293	GO:0035924	GO:BP	cellular response to vascular endothelial growth factor stimulus	18092
query_1	TRUE	0.0458148	82	2716	22	0.00810015	0.268293	GO:0008344	GO:BP	adult locomotory behavior	18092
query_1	TRUE	0.0459133	31	2716	11	0.00405007	0.354839	GO:0061036	GO:BP	positive regulation of cartilage development	18092
query_1	TRUE	0.0459133	31	2716	11	0.00405007	0.354839	GO:0060292	GO:BP	long-term synaptic depression	18092
query_1	TRUE	0.045921	87	2716	23	0.00846834	0.264368	GO:0002028	GO:BP	regulation of sodium ion transport	18092
query_1	TRUE	0.045921	87	2716	23	0.00846834	0.264368	GO:0070509	GO:BP	calcium ion import	18092
query_1	TRUE	0.0466199	149	2716	35	0.0128866	0.234899	GO:0007189	GO:BP	adenylate cyclase-activating G protein-coupled receptor signaling pathway	18092
query_1	TRUE	0.0468255	128	2716	31	0.0114138	0.242188	GO:0001952	GO:BP	regulation of cell-matrix adhesion	18092
query_1	TRUE	0.0469578	19	2716	8	0.00294551	0.421053	GO:0097107	GO:BP	postsynaptic density assembly	18092
query_1	TRUE	0.0469578	19	2716	8	0.00294551	0.421053	GO:0061484	GO:BP	hematopoietic stem cell homeostasis	18092
query_1	TRUE	0.0469578	19	2716	8	0.00294551	0.421053	GO:0055119	GO:BP	relaxation of cardiac muscle	18092
query_1	TRUE	0.0469578	19	2716	8	0.00294551	0.421053	GO:2000831	GO:BP	regulation of steroid hormone secretion	18092
query_1	TRUE	0.0469578	19	2716	8	0.00294551	0.421053	GO:0017121	GO:BP	plasma membrane phospholipid scrambling	18092
query_1	TRUE	0.0469578	19	2716	8	0.00294551	0.421053	GO:0006704	GO:BP	glucocorticoid biosynthetic process	18092
query_1	TRUE	0.0469578	19	2716	8	0.00294551	0.421053	GO:0010544	GO:BP	negative regulation of platelet activation	18092
query_1	TRUE	0.0476441	27	2716	10	0.00368189	0.37037	GO:0010996	GO:BP	response to auditory stimulus	18092
query_1	TRUE	0.0480334	2812	2716	469	0.17268	0.166785	GO:0071310	GO:BP	cellular response to organic substance	18092
query_1	TRUE	0.0481594	23	2716	9	0.0033137	0.391304	GO:0043586	GO:BP	tongue development	18092
query_1	TRUE	0.0481594	23	2716	9	0.0033137	0.391304	GO:0030539	GO:BP	male genitalia development	18092
query_1	TRUE	0.0481594	23	2716	9	0.0033137	0.391304	GO:0071379	GO:BP	cellular response to prostaglandin stimulus	18092
query_1	TRUE	0.0481594	23	2716	9	0.0033137	0.391304	GO:0098698	GO:BP	postsynaptic specialization assembly	18092
query_1	TRUE	0.0481594	231	2716	50	0.0184094	0.21645	GO:0008406	GO:BP	gonad development	18092
query_1	TRUE	0.0481594	23	2716	9	0.0033137	0.391304	GO:0055093	GO:BP	response to hyperoxia	18092
query_1	TRUE	0.0481594	384	2716	77	0.0283505	0.200521	GO:0018108	GO:BP	peptidyl-tyrosine phosphorylation	18092
query_1	TRUE	0.0482226	118	2716	29	0.0106775	0.245763	GO:0032411	GO:BP	positive regulation of transporter activity	18092
query_1	TRUE	0.0482226	118	2716	29	0.0106775	0.245763	GO:0046620	GO:BP	regulation of organ growth	18092
query_1	TRUE	0.0482379	287	2716	60	0.0220913	0.209059	GO:0043491	GO:BP	protein kinase B signaling	18092
query_1	TRUE	0.0483338	49	2716	15	0.00552283	0.306122	GO:0042461	GO:BP	photoreceptor cell development	18092
query_1	TRUE	0.048662	40	2716	13	0.00478645	0.325	GO:0001662	GO:BP	behavioral fear response	18092
query_1	TRUE	1.93592e-47	5663	2837	1191	0.41981	0.210313	GO:0005886	GO:CC	plasma membrane	18963
query_1	TRUE	3.71481e-47	5786	2837	1209	0.426154	0.208953	GO:0071944	GO:CC	cell periphery	18963
query_1	TRUE	1.22345e-28	2255	2837	532	0.187522	0.23592	GO:0120025	GO:CC	plasma membrane bounded cell projection	18963
query_1	TRUE	5.41916e-28	2352	2837	547	0.192809	0.232568	GO:0042995	GO:CC	cell projection	18963
query_1	TRUE	1.52715e-26	1728	2837	426	0.150159	0.246528	GO:0031226	GO:CC	intrinsic component of plasma membrane	18963
query_1	TRUE	1.02897e-24	1645	2837	404	0.142404	0.245593	GO:0005887	GO:CC	integral component of plasma membrane	18963
query_1	TRUE	1.77131e-23	5857	2837	1117	0.393726	0.190712	GO:0031224	GO:CC	intrinsic component of membrane	18963
query_1	TRUE	3.36001e-21	5702	2837	1080	0.380684	0.189407	GO:0016021	GO:CC	integral component of membrane	18963
query_1	TRUE	3.19773e-18	564	2837	169	0.05957	0.299645	GO:0031012	GO:CC	extracellular matrix	18963
query_1	TRUE	1.606e-17	1399	2837	332	0.117025	0.237312	GO:0043005	GO:CC	neuron projection	18963
query_1	TRUE	2.66231e-17	1255	2837	304	0.107155	0.242231	GO:0098590	GO:CC	plasma membrane region	18963
query_1	TRUE	3.7245e-17	2131	2837	463	0.163201	0.217269	GO:0030054	GO:CC	cell junction	18963
query_1	TRUE	1.50174e-16	424	2837	134	0.047233	0.316038	GO:0062023	GO:CC	collagen-containing extracellular matrix	18963
query_1	TRUE	2.33018e-16	1382	2837	324	0.114205	0.234443	GO:0045202	GO:CC	synapse	18963
query_1	TRUE	2.58529e-14	394	2837	122	0.0430032	0.309645	GO:0097060	GO:CC	synaptic membrane	18963
query_1	TRUE	1.05914e-13	1014	2837	245	0.0863588	0.241617	GO:0099081	GO:CC	supramolecular polymer	18963
query_1	TRUE	1.22477e-13	231	2837	83	0.0292563	0.359307	GO:0030016	GO:CC	myofibril	18963
query_1	TRUE	2.2496e-13	1006	2837	242	0.0853014	0.240557	GO:0099512	GO:CC	supramolecular fiber	18963
query_1	TRUE	2.2496e-13	242	2837	85	0.0299612	0.35124	GO:0043292	GO:CC	contractile fiber	18963
query_1	TRUE	2.2496e-13	209	2837	77	0.0271413	0.368421	GO:0030017	GO:CC	sarcomere	18963
query_1	TRUE	1.37525e-12	328	2837	103	0.036306	0.314024	GO:1902495	GO:CC	transmembrane transporter complex	18963
query_1	TRUE	1.36256e-11	339	2837	103	0.036306	0.303835	GO:1990351	GO:CC	transporter complex	18963
query_1	TRUE	7.68257e-11	678	2837	170	0.0599225	0.250737	GO:0005929	GO:CC	cilium	18963
query_1	TRUE	1.36636e-10	229	2837	76	0.0267889	0.331878	GO:0034703	GO:CC	cation channel complex	18963
query_1	TRUE	1.36636e-10	305	2837	93	0.0327811	0.304918	GO:0034702	GO:CC	ion channel complex	18963
query_1	TRUE	1.69798e-10	288	2837	89	0.0313712	0.309028	GO:0045211	GO:CC	postsynaptic membrane	18963
query_1	TRUE	8.75059e-10	922	2837	212	0.0747268	0.229935	GO:0009986	GO:CC	cell surface	18963
query_1	TRUE	8.75059e-10	128	2837	50	0.0176243	0.390625	GO:0005930	GO:CC	axoneme	18963
query_1	TRUE	1.16599e-09	141	2837	53	0.0186817	0.375887	GO:0031674	GO:CC	I band	18963
query_1	TRUE	1.17016e-09	893	2837	206	0.0726119	0.230683	GO:0036477	GO:CC	somatodendritic compartment	18963
query_1	TRUE	1.48266e-09	130	2837	50	0.0176243	0.384615	GO:0097014	GO:CC	ciliary plasm	18963
query_1	TRUE	1.80431e-09	219	2837	71	0.0250264	0.324201	GO:0005882	GO:CC	intermediate filament	18963
query_1	TRUE	2.64118e-09	128	2837	49	0.0172718	0.382812	GO:0030018	GO:CC	Z disc	18963
query_1	TRUE	5.36164e-09	647	2837	157	0.0553401	0.242658	GO:0098794	GO:CC	postsynapse	18963
query_1	TRUE	1.58569e-08	176	2837	59	0.0207966	0.335227	GO:0099240	GO:CC	intrinsic component of synaptic membrane	18963
query_1	TRUE	2.52801e-08	650	2837	155	0.0546352	0.238462	GO:0030425	GO:CC	dendrite	18963
query_1	TRUE	3.1003e-08	652	2837	155	0.0546352	0.23773	GO:0097447	GO:CC	dendritic tree	18963
query_1	TRUE	3.57966e-08	97	2837	39	0.0137469	0.402062	GO:0045095	GO:CC	keratin filament	18963
query_1	TRUE	4.59093e-08	138	2837	49	0.0172718	0.355072	GO:0042383	GO:CC	sarcolemma	18963
query_1	TRUE	6.3454e-08	255	2837	75	0.0264364	0.294118	GO:0045111	GO:CC	intermediate filament cytoskeleton	18963
query_1	TRUE	9.05128e-08	162	2837	54	0.0190342	0.333333	GO:0099699	GO:CC	integral component of synaptic membrane	18963
query_1	TRUE	7.90038e-07	2302	2837	434	0.152978	0.188532	GO:0005856	GO:CC	cytoskeleton	18963
query_1	TRUE	1.73321e-06	26	2837	16	0.00563976	0.615385	GO:0000137	GO:CC	Golgi cis cisterna	18963
query_1	TRUE	1.82039e-06	1337	2837	269	0.0948185	0.201197	GO:0099080	GO:CC	supramolecular complex	18963
query_1	TRUE	2.00911e-06	666	2837	150	0.0528728	0.225225	GO:0030424	GO:CC	axon	18963
query_1	TRUE	4.2739e-06	614	2837	139	0.0489954	0.226384	GO:0044297	GO:CC	cell body	18963
query_1	TRUE	4.30514e-06	208	2837	60	0.0211491	0.288462	GO:0031514	GO:CC	motile cilium	18963
query_1	TRUE	4.30514e-06	539	2837	125	0.0440606	0.231911	GO:0043025	GO:CC	neuronal cell body	18963
query_1	TRUE	4.61557e-06	218	2837	62	0.0218541	0.284404	GO:0032838	GO:CC	plasma membrane bounded cell projection cytoplasm	18963
query_1	TRUE	7.5863e-06	17	2837	12	0.00422982	0.705882	GO:0001518	GO:CC	voltage-gated sodium channel complex	18963
query_1	TRUE	1.22256e-05	263	2837	70	0.024674	0.26616	GO:0099568	GO:CC	cytoplasmic region	18963
query_1	TRUE	1.25603e-05	15	2837	11	0.00387734	0.733333	GO:0005859	GO:CC	muscle myosin complex	18963
query_1	TRUE	1.81016e-05	543	2837	123	0.0433557	0.226519	GO:0098793	GO:CC	presynapse	18963
query_1	TRUE	1.85792e-05	368	2837	90	0.0317237	0.244565	GO:0016324	GO:CC	apical plasma membrane	18963
query_1	TRUE	2.14312e-05	103	2837	35	0.012337	0.339806	GO:0005604	GO:CC	basement membrane	18963
query_1	TRUE	2.14312e-05	443	2837	104	0.0366584	0.234763	GO:0045177	GO:CC	apical part of cell	18963
query_1	TRUE	2.76288e-05	126	2837	40	0.0140994	0.31746	GO:0099634	GO:CC	postsynaptic specialization membrane	18963
query_1	TRUE	2.79125e-05	158	2837	47	0.0165668	0.297468	GO:0042734	GO:CC	presynaptic membrane	18963
query_1	TRUE	3.12807e-05	373	2837	90	0.0317237	0.241287	GO:0098978	GO:CC	glutamatergic synapse	18963
query_1	TRUE	3.88622e-05	97	2837	33	0.011632	0.340206	GO:0098839	GO:CC	postsynaptic density membrane	18963
query_1	TRUE	6.03148e-05	775	2837	162	0.0571026	0.209032	GO:0099513	GO:CC	polymeric cytoskeletal fiber	18963
query_1	TRUE	6.03148e-05	86	2837	30	0.0105746	0.348837	GO:0098889	GO:CC	intrinsic component of presynaptic membrane	18963
query_1	TRUE	7.3971e-05	131	2837	40	0.0140994	0.305344	GO:0098936	GO:CC	intrinsic component of postsynaptic membrane	18963
query_1	TRUE	0.000112731	166	2837	47	0.0165668	0.283133	GO:0097730	GO:CC	non-motile cilium	18963
query_1	TRUE	0.000149566	130	2837	39	0.0137469	0.3	GO:0097729	GO:CC	9+2 motile cilium	18963
query_1	TRUE	0.000152303	77	2837	27	0.0095171	0.350649	GO:0099056	GO:CC	integral component of presynaptic membrane	18963
query_1	TRUE	0.000166227	53	2837	21	0.00740219	0.396226	GO:0060076	GO:CC	excitatory synapse	18963
query_1	TRUE	0.000166227	188	2837	51	0.0179767	0.271277	GO:0044309	GO:CC	neuron spine	18963
query_1	TRUE	0.000170407	699	2837	146	0.0514628	0.20887	GO:0098797	GO:CC	plasma membrane protein complex	18963
query_1	TRUE	0.000180403	374	2837	87	0.0306662	0.23262	GO:0098984	GO:CC	neuron to neuron synapse	18963
query_1	TRUE	0.00021571	185	2837	50	0.0176243	0.27027	GO:0043197	GO:CC	dendritic spine	18963
query_1	TRUE	0.000264031	22	2837	12	0.00422982	0.545455	GO:0032982	GO:CC	myosin filament	18963
query_1	TRUE	0.000310553	125	2837	37	0.0130419	0.296	GO:0099055	GO:CC	integral component of postsynaptic membrane	18963
query_1	TRUE	0.000328062	348	2837	81	0.0285513	0.232759	GO:0031253	GO:CC	cell projection membrane	18963
query_1	TRUE	0.000369025	174	2837	47	0.0165668	0.270115	GO:0031225	GO:CC	anchored component of membrane	18963
query_1	TRUE	0.00038155	26	2837	13	0.00458231	0.5	GO:0034706	GO:CC	sodium channel complex	18963
query_1	TRUE	0.000391315	350	2837	81	0.0285513	0.231429	GO:0032279	GO:CC	asymmetric synapse	18963
query_1	TRUE	0.000402625	165	2837	45	0.0158618	0.272727	GO:0098862	GO:CC	cluster of actin-based cell projections	18963
query_1	TRUE	0.00049046	20	2837	11	0.00387734	0.55	GO:0016460	GO:CC	myosin II complex	18963
query_1	TRUE	0.000507892	17	2837	10	0.00352485	0.588235	GO:0098688	GO:CC	parallel fiber to Purkinje cell synapse	18963
query_1	TRUE	0.000613928	344	2837	79	0.0278463	0.229651	GO:0014069	GO:CC	postsynaptic density	18963
query_1	TRUE	0.00063459	9813	2837	1564	0.551287	0.15938	GO:0016020	GO:CC	membrane	18963
query_1	TRUE	0.000714562	84	2837	27	0.0095171	0.321429	GO:0005901	GO:CC	caveola	18963
query_1	TRUE	0.000903005	39	2837	16	0.00563976	0.410256	GO:0031672	GO:CC	A band	18963
query_1	TRUE	0.000963899	81	2837	26	0.00916461	0.320988	GO:0098982	GO:CC	GABA-ergic synapse	18963
query_1	TRUE	0.000963899	420	2837	92	0.0324286	0.219048	GO:0009897	GO:CC	external side of plasma membrane	18963
query_1	TRUE	0.00124494	518	2837	109	0.0384209	0.210425	GO:0043235	GO:CC	receptor complex	18963
query_1	TRUE	0.00148954	370	2837	82	0.0289038	0.221622	GO:0099572	GO:CC	postsynaptic specialization	18963
query_1	TRUE	0.00158716	70	2837	23	0.00810716	0.328571	GO:0044304	GO:CC	main axon	18963
query_1	TRUE	0.00160742	19	2837	10	0.00352485	0.526316	GO:0090533	GO:CC	cation-transporting ATPase complex	18963
query_1	TRUE	0.0016991	66	2837	22	0.00775467	0.333333	GO:0031093	GO:CC	platelet alpha granule lumen	18963
query_1	TRUE	0.0017649	13	2837	8	0.00281988	0.615385	GO:0033270	GO:CC	paranode region of axon	18963
query_1	TRUE	0.0017649	84	2837	26	0.00916461	0.309524	GO:0098948	GO:CC	intrinsic component of postsynaptic specialization membrane	18963
query_1	TRUE	0.00187863	58	2837	20	0.0070497	0.344828	GO:0099146	GO:CC	intrinsic component of postsynaptic density membrane	18963
query_1	TRUE	0.00187863	4602	2837	765	0.269651	0.166232	GO:0005576	GO:CC	extracellular region	18963
query_1	TRUE	0.00187863	58	2837	20	0.0070497	0.344828	GO:0031526	GO:CC	brush border membrane	18963
query_1	TRUE	0.00187863	80	2837	25	0.00881213	0.3125	GO:0016528	GO:CC	sarcoplasm	18963
query_1	TRUE	0.00220689	90	2837	27	0.0095171	0.3	GO:0031091	GO:CC	platelet alpha granule	18963
query_1	TRUE	0.00220689	63	2837	21	0.00740219	0.333333	GO:0032589	GO:CC	neuron projection membrane	18963
query_1	TRUE	0.00258327	134	2837	36	0.0126895	0.268657	GO:0097731	GO:CC	9+0 non-motile cilium	18963
query_1	TRUE	0.00285622	120	2837	33	0.011632	0.275	GO:0036126	GO:CC	sperm flagellum	18963
query_1	TRUE	0.00355808	843	2837	162	0.0571026	0.192171	GO:0070161	GO:CC	anchoring junction	18963
query_1	TRUE	0.00371176	506	2837	104	0.0366584	0.205534	GO:0005911	GO:CC	cell-cell junction	18963
query_1	TRUE	0.0040412	513	2837	105	0.0370109	0.204678	GO:0015629	GO:CC	actin cytoskeleton	18963
query_1	TRUE	0.00457048	80	2837	24	0.00845964	0.3	GO:0099060	GO:CC	integral component of postsynaptic specialization membrane	18963
query_1	TRUE	0.0046484	25	2837	11	0.00387734	0.44	GO:0031430	GO:CC	M band	18963
query_1	TRUE	0.0046484	49	2837	17	0.00599225	0.346939	GO:0008328	GO:CC	ionotropic glutamate receptor complex	18963
query_1	TRUE	0.0046484	25	2837	11	0.00387734	0.44	GO:0098533	GO:CC	ATPase dependent transmembrane transport complex	18963
query_1	TRUE	0.00473245	4	2837	4	0.00140994	1	GO:0071953	GO:CC	elastic fiber	18963
query_1	TRUE	0.00473245	4	2837	4	0.00140994	1	GO:0036457	GO:CC	keratohyalin granule	18963
query_1	TRUE	0.00473945	109	2837	30	0.0105746	0.275229	GO:0005903	GO:CC	brush border	18963
query_1	TRUE	0.00532905	54	2837	18	0.00634473	0.333333	GO:0099061	GO:CC	integral component of postsynaptic density membrane	18963
query_1	TRUE	0.00532905	54	2837	18	0.00634473	0.333333	GO:0030315	GO:CC	T-tubule	18963
query_1	TRUE	0.00600878	12	2837	7	0.0024674	0.583333	GO:0005614	GO:CC	interstitial matrix	18963
query_1	TRUE	0.0073758	51	2837	17	0.00599225	0.333333	GO:0098878	GO:CC	neurotransmitter receptor complex	18963
query_1	TRUE	0.00841302	23	2837	10	0.00352485	0.434783	GO:0005858	GO:CC	axonemal dynein complex	18963
query_1	TRUE	0.00841302	56	2837	18	0.00634473	0.321429	GO:0030286	GO:CC	dynein complex	18963
query_1	TRUE	0.00841302	123	2837	32	0.0112795	0.260163	GO:0097733	GO:CC	photoreceptor cell cilium	18963
query_1	TRUE	0.00841302	43	2837	15	0.00528728	0.348837	GO:0032590	GO:CC	dendrite membrane	18963
query_1	TRUE	0.00841302	222	2837	51	0.0179767	0.22973	GO:0098858	GO:CC	actin-based cell projection	18963
query_1	TRUE	0.00915491	632	2837	123	0.0433557	0.19462	GO:0098552	GO:CC	side of membrane	18963
query_1	TRUE	0.0106261	71	2837	21	0.00740219	0.295775	GO:0034704	GO:CC	calcium channel complex	18963
query_1	TRUE	0.0115015	10	2837	6	0.00211491	0.6	GO:0034464	GO:CC	BBSome	18963
query_1	TRUE	0.0115576	336	2837	71	0.0250264	0.21131	GO:0045121	GO:CC	membrane raft	18963
query_1	TRUE	0.0124434	337	2837	71	0.0250264	0.210682	GO:0098857	GO:CC	membrane microdomain	18963
query_1	TRUE	0.01251	72	2837	21	0.00740219	0.291667	GO:0035869	GO:CC	ciliary transition zone	18963
query_1	TRUE	0.015637	78	2837	22	0.00775467	0.282051	GO:0048786	GO:CC	presynaptic active zone	18963
query_1	TRUE	0.0171242	69	2837	20	0.0070497	0.289855	GO:0005801	GO:CC	cis-Golgi network	18963
query_1	TRUE	0.0192904	94	2837	25	0.00881213	0.265957	GO:0001750	GO:CC	photoreceptor outer segment	18963
query_1	TRUE	0.0209148	11	2837	6	0.00211491	0.545455	GO:0005883	GO:CC	neurofilament	18963
query_1	TRUE	0.0211363	18	2837	8	0.00281988	0.444444	GO:0043083	GO:CC	synaptic cleft	18963
query_1	TRUE	0.0214311	249	2837	54	0.0190342	0.216867	GO:0016323	GO:CC	basolateral plasma membrane	18963
query_1	TRUE	0.0261858	3	2837	3	0.00105746	1	GO:0031004	GO:CC	potassium ion-transporting ATPase complex	18963
query_1	TRUE	0.0272725	15	2837	7	0.0024674	0.466667	GO:0033268	GO:CC	node of Ranvier	18963
query_1	TRUE	0.0272725	159	2837	37	0.0130419	0.232704	GO:0043204	GO:CC	perikaryon	18963
query_1	TRUE	0.0285771	44	2837	14	0.00493479	0.318182	GO:0032391	GO:CC	photoreceptor connecting cilium	18963
query_1	TRUE	0.0287815	92	2837	24	0.00845964	0.26087	GO:0005902	GO:CC	microvillus	18963
query_1	TRUE	0.0297237	19	2837	8	0.00281988	0.421053	GO:0043034	GO:CC	costamere	18963
query_1	TRUE	0.0297237	19	2837	8	0.00281988	0.421053	GO:0090665	GO:CC	glycoprotein complex	18963
query_1	TRUE	0.0297237	19	2837	8	0.00281988	0.421053	GO:0016010	GO:CC	dystrophin-associated glycoprotein complex	18963
query_1	TRUE	0.029875	118	2837	29	0.0102221	0.245763	GO:0044853	GO:CC	plasma membrane raft	18963
query_1	TRUE	0.0334707	12	2837	6	0.00211491	0.5	GO:0005890	GO:CC	sodium:potassium-exchanging ATPase complex	18963
query_1	TRUE	0.034115	45	2837	14	0.00493479	0.311111	GO:0005891	GO:CC	voltage-gated calcium channel complex	18963
query_1	TRUE	0.0364067	32	2837	11	0.00387734	0.34375	GO:0016342	GO:CC	catenin complex	18963
query_1	TRUE	0.0364067	32	2837	11	0.00387734	0.34375	GO:0048787	GO:CC	presynaptic active zone membrane	18963
query_1	TRUE	0.0385263	28	2837	10	0.00352485	0.357143	GO:0032281	GO:CC	AMPA glutamate receptor complex	18963
query_1	TRUE	0.0385263	9	2837	5	0.00176243	0.555556	GO:0097648	GO:CC	G protein-coupled receptor complex	18963
query_1	TRUE	0.0385263	16	2837	7	0.0024674	0.4375	GO:0043194	GO:CC	axon initial segment	18963
query_1	TRUE	0.0385263	9	2837	5	0.00176243	0.555556	GO:0008091	GO:CC	spectrin	18963
query_1	TRUE	0.0385263	16	2837	7	0.0024674	0.4375	GO:0099059	GO:CC	integral component of presynaptic active zone membrane	18963
query_1	TRUE	0.0401181	6	2837	4	0.00140994	0.666667	GO:0098985	GO:CC	asymmetric, glutamatergic, excitatory synapse	18963
query_1	TRUE	0.0475332	86	2837	22	0.00775467	0.255814	GO:0098685	GO:CC	Schaffer collateral - CA1 synapse	18963
query_1	TRUE	0.0476555	71	2837	19	0.00669722	0.267606	GO:0016529	GO:CC	sarcoplasmic reticulum	18963
query_1	TRUE	2.72032e-47	1477	2794	435	0.155691	0.294516	GO:0060089	GO:MF	molecular transducer activity	18694
query_1	TRUE	2.72032e-47	1477	2794	435	0.155691	0.294516	GO:0038023	GO:MF	signaling receptor activity	18694
query_1	TRUE	1.24755e-46	399	2794	182	0.0651396	0.45614	GO:0004984	GO:MF	olfactory receptor activity	18694
query_1	TRUE	4.96166e-46	1262	2794	386	0.138153	0.305864	GO:0004888	GO:MF	transmembrane signaling receptor activity	18694
query_1	TRUE	4.63849e-40	840	2794	280	0.100215	0.333333	GO:0004930	GO:MF	G protein-coupled receptor activity	18694
query_1	TRUE	2.99139e-12	722	2794	186	0.0665712	0.257618	GO:0005509	GO:MF	calcium ion binding	18694
query_1	TRUE	1.95915e-10	344	2794	103	0.0368647	0.299419	GO:0022836	GO:MF	gated channel activity	18694
query_1	TRUE	1.95915e-10	169	2794	63	0.0225483	0.372781	GO:0005201	GO:MF	extracellular matrix structural constituent	18694
query_1	TRUE	1.03798e-09	440	2794	121	0.0433071	0.275	GO:0005216	GO:MF	ion channel activity	18694
query_1	TRUE	1.03798e-09	489	2794	131	0.0468862	0.267894	GO:0015267	GO:MF	channel activity	18694
query_1	TRUE	1.08841e-09	490	2794	131	0.0468862	0.267347	GO:0022803	GO:MF	passive transmembrane transporter activity	18694
query_1	TRUE	1.1817e-08	93	2794	40	0.0143164	0.430108	GO:0005549	GO:MF	odorant binding	18694
query_1	TRUE	3.55732e-08	836	2794	192	0.0687187	0.229665	GO:0015318	GO:MF	inorganic molecular entity transmembrane transporter activity	18694
query_1	TRUE	2.16436e-07	343	2794	94	0.0336435	0.274052	GO:0005261	GO:MF	cation channel activity	18694
query_1	TRUE	2.718e-06	441	2794	110	0.0393701	0.249433	GO:0046873	GO:MF	metal ion transmembrane transporter activity	18694
query_1	TRUE	3.14339e-06	86	2794	34	0.0121689	0.395349	GO:0042562	GO:MF	hormone binding	18694
query_1	TRUE	4.9585e-06	168	2794	53	0.0189692	0.315476	GO:0008201	GO:MF	heparin binding	18694
query_1	TRUE	4.98309e-06	142	2794	47	0.0168218	0.330986	GO:0022834	GO:MF	ligand-gated channel activity	18694
query_1	TRUE	4.98309e-06	142	2794	47	0.0168218	0.330986	GO:0015276	GO:MF	ligand-gated ion channel activity	18694
query_1	TRUE	6.07357e-06	1081	2794	225	0.0805297	0.208141	GO:0022857	GO:MF	transmembrane transporter activity	18694
query_1	TRUE	6.87995e-06	157	2794	50	0.0178955	0.318471	GO:0015081	GO:MF	sodium ion transmembrane transporter activity	18694
query_1	TRUE	8.54116e-06	237	2794	67	0.02398	0.2827	GO:0005539	GO:MF	glycosaminoglycan binding	18694
query_1	TRUE	1.33361e-05	962	2794	202	0.0722978	0.209979	GO:0015075	GO:MF	ion transmembrane transporter activity	18694
query_1	TRUE	1.65939e-05	109	2794	38	0.0136006	0.348624	GO:0030594	GO:MF	neurotransmitter receptor activity	18694
query_1	TRUE	2.51235e-05	1190	2794	240	0.0858984	0.201681	GO:0005215	GO:MF	transporter activity	18694
query_1	TRUE	2.51235e-05	264	2794	71	0.0254116	0.268939	GO:1901681	GO:MF	sulfur compound binding	18694
query_1	TRUE	2.51235e-05	82	2794	31	0.0110952	0.378049	GO:0019199	GO:MF	transmembrane receptor protein kinase activity	18694
query_1	TRUE	2.71313e-05	1681	2794	323	0.115605	0.192148	GO:0005102	GO:MF	signaling receptor binding	18694
query_1	TRUE	4.04233e-05	23	2794	14	0.00501074	0.608696	GO:0005248	GO:MF	voltage-gated sodium channel activity	18694
query_1	TRUE	4.04233e-05	604	2794	135	0.0483178	0.22351	GO:0022890	GO:MF	inorganic cation transmembrane transporter activity	18694
query_1	TRUE	4.04233e-05	200	2794	57	0.0204009	0.285	GO:0005244	GO:MF	voltage-gated ion channel activity	18694
query_1	TRUE	4.68062e-05	201	2794	57	0.0204009	0.283582	GO:0022832	GO:MF	voltage-gated channel activity	18694
query_1	TRUE	4.81442e-05	445	2794	105	0.0375805	0.235955	GO:0003779	GO:MF	actin binding	18694
query_1	TRUE	5.04197e-05	119	2794	39	0.0139585	0.327731	GO:0005262	GO:MF	calcium channel activity	18694
query_1	TRUE	6.91727e-05	650	2794	142	0.0508232	0.218462	GO:0008324	GO:MF	cation transmembrane transporter activity	18694
query_1	TRUE	7.80501e-05	37	2794	18	0.00644238	0.486486	GO:0042805	GO:MF	actinin binding	18694
query_1	TRUE	9.13323e-05	48	2794	21	0.00751611	0.4375	GO:0008227	GO:MF	G protein-coupled amine receptor activity	18694
query_1	TRUE	9.70392e-05	995	2794	202	0.0722978	0.203015	GO:0008092	GO:MF	cytoskeletal protein binding	18694
query_1	TRUE	0.000210808	135	2794	41	0.0146743	0.303704	GO:0015085	GO:MF	calcium ion transmembrane transporter activity	18694
query_1	TRUE	0.000217767	17	2794	11	0.00393701	0.647059	GO:0005132	GO:MF	type I interferon receptor binding	18694
query_1	TRUE	0.000217767	43	2794	19	0.00680029	0.44186	GO:0008307	GO:MF	structural constituent of muscle	18694
query_1	TRUE	0.000293859	137	2794	41	0.0146743	0.29927	GO:0019838	GO:MF	growth factor binding	18694
query_1	TRUE	0.00030368	698	2794	147	0.0526127	0.210602	GO:0005198	GO:MF	structural molecule activity	18694
query_1	TRUE	0.00030368	44	2794	19	0.00680029	0.431818	GO:0005272	GO:MF	sodium channel activity	18694
query_1	TRUE	0.000636669	28	2794	14	0.00501074	0.5	GO:0051393	GO:MF	alpha-actinin binding	18694
query_1	TRUE	0.000677302	54	2794	21	0.00751611	0.388889	GO:0098531	GO:MF	ligand-activated transcription factor activity	18694
query_1	TRUE	0.000677302	54	2794	21	0.00751611	0.388889	GO:0004879	GO:MF	nuclear receptor activity	18694
query_1	TRUE	0.000722122	110	2794	34	0.0121689	0.309091	GO:0099094	GO:MF	ligand-gated cation channel activity	18694
query_1	TRUE	0.000722122	152	2794	43	0.0153901	0.282895	GO:0001653	GO:MF	peptide receptor activity	18694
query_1	TRUE	0.000791786	106	2794	33	0.011811	0.311321	GO:0004497	GO:MF	monooxygenase activity	18694
query_1	TRUE	0.000840194	63	2794	23	0.00823193	0.365079	GO:0004714	GO:MF	transmembrane receptor protein tyrosine kinase activity	18694
query_1	TRUE	0.000846046	55	2794	21	0.00751611	0.381818	GO:0003707	GO:MF	steroid hormone receptor activity	18694
query_1	TRUE	0.000846046	163	2794	45	0.0161059	0.276074	GO:0008083	GO:MF	growth factor activity	18694
query_1	TRUE	0.000862646	144	2794	41	0.0146743	0.284722	GO:0022843	GO:MF	voltage-gated cation channel activity	18694
query_1	TRUE	0.00106156	453	2794	100	0.035791	0.220751	GO:0004175	GO:MF	endopeptidase activity	18694
query_1	TRUE	0.0010922	52	2794	20	0.0071582	0.384615	GO:0017046	GO:MF	peptide hormone binding	18694
query_1	TRUE	0.00161457	148	2794	41	0.0146743	0.277027	GO:0005178	GO:MF	integrin binding	18694
query_1	TRUE	0.00161457	148	2794	41	0.0146743	0.277027	GO:0008528	GO:MF	G protein-coupled peptide receptor activity	18694
query_1	TRUE	0.00263209	5	2794	5	0.00178955	1	GO:0086007	GO:MF	voltage-gated calcium channel activity involved in cardiac muscle cell action potential	18694
query_1	TRUE	0.00263209	5	2794	5	0.00178955	1	GO:0038085	GO:MF	vascular endothelial growth factor binding	18694
query_1	TRUE	0.00326426	25	2794	12	0.00429492	0.48	GO:0070330	GO:MF	aromatase activity	18694
query_1	TRUE	0.00447823	10	2794	7	0.00250537	0.7	GO:0008331	GO:MF	high voltage-gated calcium channel activity	18694
query_1	TRUE	0.00464499	19	2794	10	0.0035791	0.526316	GO:0008569	GO:MF	ATP-dependent microtubule motor activity, minus-end-directed	18694
query_1	TRUE	0.00496233	75	2794	24	0.00858984	0.32	GO:0005230	GO:MF	extracellular ligand-gated ion channel activity	18694
query_1	TRUE	0.00496233	13	2794	8	0.00286328	0.615385	GO:0070679	GO:MF	inositol 1,4,5 trisphosphate binding	18694
query_1	TRUE	0.00496233	16	2794	9	0.00322119	0.5625	GO:0061778	GO:MF	intracellular chloride channel activity	18694
query_1	TRUE	0.00496233	16	2794	9	0.00322119	0.5625	GO:0005229	GO:MF	intracellular calcium activated chloride channel activity	18694
query_1	TRUE	0.00621195	46	2794	17	0.00608447	0.369565	GO:0005245	GO:MF	voltage-gated calcium channel activity	18694
query_1	TRUE	0.00621195	38	2794	15	0.00536865	0.394737	GO:0008395	GO:MF	steroid hydroxylase activity	18694
query_1	TRUE	0.00714044	20	2794	10	0.0035791	0.5	GO:0004745	GO:MF	retinol dehydrogenase activity	18694
query_1	TRUE	0.00714044	8	2794	6	0.00214746	0.75	GO:0101020	GO:MF	estrogen 16-alpha-hydroxylase activity	18694
query_1	TRUE	0.00717299	134	2794	36	0.0128848	0.268657	GO:0003774	GO:MF	motor activity	18694
query_1	TRUE	0.00822407	101	2794	29	0.0103794	0.287129	GO:0015108	GO:MF	chloride transmembrane transporter activity	18694
query_1	TRUE	0.00864297	69	2794	22	0.00787402	0.318841	GO:0005518	GO:MF	collagen binding	18694
query_1	TRUE	0.0102036	305	2794	68	0.0243379	0.222951	GO:0042277	GO:MF	peptide binding	18694
query_1	TRUE	0.0102036	61	2794	20	0.0071582	0.327869	GO:0022824	GO:MF	transmitter-gated ion channel activity	18694
query_1	TRUE	0.0102036	61	2794	20	0.0071582	0.327869	GO:0022835	GO:MF	transmitter-gated channel activity	18694
query_1	TRUE	0.0103221	44	2794	16	0.00572656	0.363636	GO:0022839	GO:MF	ion gated channel activity	18694
query_1	TRUE	0.0127462	4	2794	4	0.00143164	1	GO:0034875	GO:MF	caffeine oxidase activity	18694
query_1	TRUE	0.0127462	4	2794	4	0.00143164	1	GO:0004971	GO:MF	AMPA glutamate receptor activity	18694
query_1	TRUE	0.0127462	164	2794	41	0.0146743	0.25	GO:0072509	GO:MF	divalent inorganic cation transmembrane transporter activity	18694
query_1	TRUE	0.0127462	4	2794	4	0.00143164	1	GO:0038100	GO:MF	nodal binding	18694
query_1	TRUE	0.0127462	4	2794	4	0.00143164	1	GO:0033695	GO:MF	oxidoreductase activity, acting on CH or CH2 groups, quinone or similar compound as acceptor	18694
query_1	TRUE	0.0130376	76	2794	23	0.00823193	0.302632	GO:0001540	GO:MF	amyloid-beta binding	18694
query_1	TRUE	0.0130642	29	2794	12	0.00429492	0.413793	GO:0033612	GO:MF	receptor serine/threonine kinase binding	18694
query_1	TRUE	0.0144264	15	2794	8	0.00286328	0.533333	GO:0042043	GO:MF	neurexin family protein binding	18694
query_1	TRUE	0.0144264	15	2794	8	0.00286328	0.533333	GO:0030553	GO:MF	cGMP binding	18694
query_1	TRUE	0.0151405	22	2794	10	0.0035791	0.454545	GO:0030021	GO:MF	extracellular matrix structural constituent conferring compression resistance	18694
query_1	TRUE	0.0154259	648	2794	127	0.0454545	0.195988	GO:0008233	GO:MF	peptidase activity	18694
query_1	TRUE	0.0157157	395	2794	83	0.0297065	0.210127	GO:0015077	GO:MF	monovalent inorganic cation transmembrane transporter activity	18694
query_1	TRUE	0.0166161	26	2794	11	0.00393701	0.423077	GO:0042923	GO:MF	neuropeptide binding	18694
query_1	TRUE	0.018403	137	2794	35	0.0125268	0.255474	GO:0019955	GO:MF	cytokine binding	18694
query_1	TRUE	0.018403	210	2794	49	0.0175376	0.233333	GO:0051015	GO:MF	actin filament binding	18694
query_1	TRUE	0.018403	19	2794	9	0.00322119	0.473684	GO:0004970	GO:MF	ionotropic glutamate receptor activity	18694
query_1	TRUE	0.0209086	190	2794	45	0.0161059	0.236842	GO:0008237	GO:MF	metallopeptidase activity	18694
query_1	TRUE	0.0212856	23	2794	10	0.0035791	0.434783	GO:0070696	GO:MF	transmembrane receptor protein serine/threonine kinase binding	18694
query_1	TRUE	0.0223701	75	2794	22	0.00787402	0.293333	GO:0033293	GO:MF	monocarboxylic acid binding	18694
query_1	TRUE	0.0223701	75	2794	22	0.00787402	0.293333	GO:0005254	GO:MF	chloride channel activity	18694
query_1	TRUE	0.0223701	27	2794	11	0.00393701	0.407407	GO:0008066	GO:MF	glutamate receptor activity	18694
query_1	TRUE	0.0223701	31	2794	12	0.00429492	0.387097	GO:0099589	GO:MF	serotonin receptor activity	18694
query_1	TRUE	0.0223701	35	2794	13	0.00465283	0.371429	GO:1990939	GO:MF	ATP-dependent microtubule motor activity	18694
query_1	TRUE	0.0223701	31	2794	12	0.00429492	0.387097	GO:0004993	GO:MF	G protein-coupled serotonin receptor activity	18694
query_1	TRUE	0.0227323	109	2794	29	0.0103794	0.266055	GO:0004222	GO:MF	metalloendopeptidase activity	18694
query_1	TRUE	0.0237786	7	2794	5	0.00178955	0.714286	GO:0004024	GO:MF	alcohol dehydrogenase activity, zinc-dependent	18694
query_1	TRUE	0.0237786	7	2794	5	0.00178955	0.714286	GO:0004321	GO:MF	fatty-acyl-CoA synthase activity	18694
query_1	TRUE	0.0237786	150	2794	37	0.0132427	0.246667	GO:0046943	GO:MF	carboxylic acid transmembrane transporter activity	18694
query_1	TRUE	0.0237786	7	2794	5	0.00178955	0.714286	GO:0005021	GO:MF	vascular endothelial growth factor-activated receptor activity	18694
query_1	TRUE	0.0256332	10	2794	6	0.00214746	0.6	GO:0016725	GO:MF	oxidoreductase activity, acting on CH or CH2 groups	18694
query_1	TRUE	0.0256332	10	2794	6	0.00214746	0.6	GO:0047760	GO:MF	butyrate-CoA ligase activity	18694
query_1	TRUE	0.0256332	10	2794	6	0.00214746	0.6	GO:0004022	GO:MF	alcohol dehydrogenase (NAD+) activity	18694
query_1	TRUE	0.0256332	151	2794	37	0.0132427	0.245033	GO:0005342	GO:MF	organic acid transmembrane transporter activity	18694
query_1	TRUE	0.0256332	10	2794	6	0.00214746	0.6	GO:0004935	GO:MF	adrenergic receptor activity	18694
query_1	TRUE	0.0266686	36	2794	13	0.00465283	0.361111	GO:0016712	GO:MF	oxidoreductase activity, acting on paired donors, with incorporation or reduction of molecular oxygen, reduced flavin or flavoprotein as one donor, and incorporation of one atom of oxygen	18694
query_1	TRUE	0.0382223	144	2794	35	0.0125268	0.243056	GO:0020037	GO:MF	heme binding	18694
query_1	TRUE	0.0394742	5	2794	4	0.00143164	0.8	GO:0047086	GO:MF	ketosteroid monooxygenase activity	18694
query_1	TRUE	0.0394742	5	2794	4	0.00143164	0.8	GO:0004499	GO:MF	N,N-dimethylaniline monooxygenase activity	18694
query_1	TRUE	0.0394742	14	2794	7	0.00250537	0.5	GO:0047555	GO:MF	3',5'-cyclic-GMP phosphodiesterase activity	18694
query_1	TRUE	0.0394742	5	2794	4	0.00143164	0.8	GO:0004096	GO:MF	catalase activity	18694
query_1	TRUE	0.0415266	51	2794	16	0.00572656	0.313725	GO:0099529	GO:MF	neurotransmitter receptor activity involved in regulation of postsynaptic membrane potential	18694
query_1	TRUE	0.0424042	204	2794	46	0.0164639	0.22549	GO:0005516	GO:MF	calmodulin binding	18694
query_1	TRUE	0.0436615	38	2794	13	0.00465283	0.342105	GO:0019825	GO:MF	oxygen binding	18694
query_1	TRUE	0.0445039	11	2794	6	0.00214746	0.545455	GO:0032052	GO:MF	bile acid binding	18694
query_1	TRUE	0.0445039	11	2794	6	0.00214746	0.545455	GO:0018455	GO:MF	alcohol dehydrogenase [NAD(P)+] activity	18694
query_1	TRUE	0.0445039	11	2794	6	0.00214746	0.545455	GO:0097493	GO:MF	structural molecule activity conferring elasticity	18694
query_1	TRUE	0.0448429	460	2794	91	0.0325698	0.197826	GO:0008509	GO:MF	anion transmembrane transporter activity	18694
query_1	TRUE	0.0448429	18	2794	8	0.00286328	0.444444	GO:0034185	GO:MF	apolipoprotein binding	18694
query_1	TRUE	0.0448429	34	2794	12	0.00429492	0.352941	GO:0016229	GO:MF	steroid dehydrogenase activity	18694
query_1	TRUE	0.0464682	8	2794	5	0.00178955	0.625	GO:0047023	GO:MF	androsterone dehydrogenase activity	18694
query_1	TRUE	0.0472836	22	2794	9	0.00322119	0.409091	GO:0016849	GO:MF	phosphorus-oxygen lyase activity	18694
query_1	TRUE	0.0472911	66	2794	19	0.00680029	0.287879	GO:0098960	GO:MF	postsynaptic neurotransmitter receptor activity	18694
query_1	TRUE	7.97957e-05	1766	799	387	0.484355	0.219139	HP:0000006	HP	Autosomal dominant inheritance	4461
query_1	TRUE	0.000120701	100	799	41	0.0513141	0.41	HP:0005115	HP	Supraventricular arrhythmia	4461
query_1	TRUE	0.00257582	71	799	30	0.0375469	0.422535	HP:0001692	HP	Atrial arrhythmia	4461
query_1	TRUE	0.00467791	135	799	46	0.057572	0.340741	HP:0002686	HP	Prenatal maternal abnormality	4461
query_1	TRUE	0.00467791	15	799	11	0.0137672	0.733333	HP:0007979	HP	Gaze-evoked horizontal nystagmus	4461
query_1	TRUE	0.00914387	66	799	27	0.0337922	0.409091	HP:0005110	HP	Atrial fibrillation	4461
query_1	TRUE	0.023034	179	799	54	0.0675845	0.301676	HP:0000789	HP	Infertility	4461
query_1	TRUE	0.023034	104	799	36	0.0450563	0.346154	HP:0032016	HP	Abnormal sputum	4461
query_1	TRUE	0.042155	13	799	9	0.0112641	0.692308	HP:0011468	HP	Facial tics	4461
query_1	TRUE	0.042155	108	799	36	0.0450563	0.333333	HP:0011534	HP	Abnormal spatial orientation of the cardiac segments	4461
query_1	TRUE	0.044586	44	799	19	0.0237797	0.431818	HP:0004755	HP	Supraventricular tachycardia	4461
query_1	TRUE	1.91987e-06	411	1420	97	0.0683099	0.23601	HPA:0570791	HPA	testis; round or early spermatids[‚â•Low]	10596
query_1	TRUE	1.91987e-06	335	1420	83	0.0584507	0.247761	HPA:0570752	HPA	testis; elongated or late spermatids[‚â•Medium]	10596
query_1	TRUE	1.91987e-06	376	1420	90	0.0633803	0.239362	HPA:0570751	HPA	testis; elongated or late spermatids[‚â•Low]	10596
query_1	TRUE	2.37516e-06	363	1420	87	0.0612676	0.239669	HPA:0570761	HPA	testis; pachytene spermatocytes[‚â•Low]	10596
query_1	TRUE	2.79269e-06	333	1420	81	0.0570423	0.243243	HPA:0570792	HPA	testis; round or early spermatids[‚â•Medium]	10596
query_1	TRUE	2.79269e-06	312	1420	77	0.0542254	0.246795	HPA:0570781	HPA	testis; preleptotene spermatocytes[‚â•Low]	10596
query_1	TRUE	5.72354e-05	252	1420	62	0.043662	0.246032	HPA:0570753	HPA	testis; elongated or late spermatids[High]	10596
query_1	TRUE	0.000131679	298	1420	69	0.0485915	0.231544	HPA:0570811	HPA	testis; spermatogonia cells[‚â•Low]	10596
query_1	TRUE	0.0120279	15	1420	8	0.0056338	0.533333	HPA:0230332	HPA	hair; cells in internal root sheath[‚â•Medium]	10596
query_1	TRUE	0.0120279	15	1420	8	0.0056338	0.533333	HPA:0230331	HPA	hair; cells in internal root sheath[‚â•Low]	10596
query_1	TRUE	0.0139333	244	1420	52	0.0366197	0.213115	HPA:0570793	HPA	testis; round or early spermatids[High]	10596
query_1	TRUE	0.0139333	279	1420	58	0.0408451	0.207885	HPA:0570762	HPA	testis; pachytene spermatocytes[‚â•Medium]	10596
query_1	TRUE	0.0302805	52	1420	16	0.0112676	0.307692	HPA:0370000	HPA	pituitary gland	10596
query_1	TRUE	0.0480505	27	1420	10	0.00704225	0.37037	HPA:0100142	HPA	cerebral cortex; neuronal projections[‚â•Medium]	10596
query_1	TRUE	0.0480505	223	1420	46	0.0323944	0.206278	HPA:0570812	HPA	testis; spermatogonia cells[‚â•Medium]	10596
query_1	TRUE	0.0480505	31	1420	11	0.00774648	0.354839	HPA:0100141	HPA	cerebral cortex; neuronal projections[‚â•Low]	10596
query_1	TRUE	1.11103e-47	434	1283	197	0.153546	0.453917	KEGG:04740	KEGG	Olfactory transduction	7987
query_1	TRUE	2.08906e-09	68	1283	35	0.0272798	0.514706	KEGG:00982	KEGG	Drug metabolism - cytochrome P450	7987
query_1	TRUE	1.75036e-08	339	1283	100	0.0779423	0.294985	KEGG:04080	KEGG	Neuroactive ligand-receptor interaction	7987
query_1	TRUE	3.01279e-07	80	1283	35	0.0272798	0.4375	KEGG:05204	KEGG	Chemical carcinogenesis	7987
query_1	TRUE	1.06412e-06	73	1283	32	0.0249415	0.438356	KEGG:00980	KEGG	Metabolism of xenobiotics by cytochrome P450	7987
query_1	TRUE	2.88473e-06	216	1283	66	0.0514419	0.305556	KEGG:04024	KEGG	cAMP signaling pathway	7987
query_1	TRUE	8.08311e-06	165	1283	53	0.0413094	0.321212	KEGG:04022	KEGG	cGMP-PKG signaling pathway	7987
query_1	TRUE	8.08311e-06	95	1283	36	0.0280592	0.378947	KEGG:05414	KEGG	Dilated cardiomyopathy	7987
query_1	TRUE	1.76462e-05	102	1283	37	0.0288387	0.362745	KEGG:04972	KEGG	Pancreatic secretion	7987
query_1	TRUE	2.19055e-05	239	1283	68	0.0530008	0.284519	KEGG:04020	KEGG	Calcium signaling pathway	7987
query_1	TRUE	6.86666e-05	68	1283	27	0.0210444	0.397059	KEGG:00830	KEGG	Retinol metabolism	7987
query_1	TRUE	8.03386e-05	40	1283	19	0.014809	0.475	KEGG:05033	KEGG	Nicotine addiction	7987
query_1	TRUE	8.03386e-05	97	1283	34	0.0265004	0.350515	KEGG:04713	KEGG	Circadian entrainment	7987
query_1	TRUE	8.03386e-05	69	1283	27	0.0210444	0.391304	KEGG:04924	KEGG	Renin secretion	7987
query_1	TRUE	0.000102231	90	1283	32	0.0249415	0.355556	KEGG:04976	KEGG	Bile secretion	7987
query_1	TRUE	0.000102515	150	1283	46	0.0358535	0.306667	KEGG:04261	KEGG	Adrenergic signaling in cardiomyocytes	7987
query_1	TRUE	0.000106659	103	1283	35	0.0272798	0.339806	KEGG:04974	KEGG	Protein digestion and absorption	7987
query_1	TRUE	0.000130923	60	1283	24	0.0187062	0.4	KEGG:00140	KEGG	Steroid hormone biosynthesis	7987
query_1	TRUE	0.000138406	113	1283	37	0.0288387	0.327434	KEGG:04726	KEGG	Serotonergic synapse	7987
query_1	TRUE	0.000174538	89	1283	31	0.0241621	0.348315	KEGG:05032	KEGG	Morphine addiction	7987
query_1	TRUE	0.000219644	133	1283	41	0.0319564	0.308271	KEGG:04270	KEGG	Vascular smooth muscle contraction	7987
query_1	TRUE	0.000234561	51	1283	21	0.0163679	0.411765	KEGG:04913	KEGG	Ovarian steroidogenesis	7987
query_1	TRUE	0.000245526	55	1283	22	0.0171473	0.4	KEGG:04923	KEGG	Regulation of lipolysis in adipocytes	7987
query_1	TRUE	0.000341008	353	1283	86	0.0670304	0.243626	KEGG:04151	KEGG	PI3K-Akt signaling pathway	7987
query_1	TRUE	0.000341008	114	1283	36	0.0280592	0.315789	KEGG:04724	KEGG	Glutamatergic synapse	7987
query_1	TRUE	0.000680793	47	1283	19	0.014809	0.404255	KEGG:04973	KEGG	Carbohydrate digestion and absorption	7987
query_1	TRUE	0.00106979	85	1283	28	0.0218239	0.329412	KEGG:04610	KEGG	Complement and coagulation cascades	7987
query_1	TRUE	0.0012149	90	1283	29	0.0226033	0.322222	KEGG:05410	KEGG	Hypertrophic cardiomyopathy	7987
query_1	TRUE	0.00170205	35	1283	15	0.0116913	0.428571	KEGG:00350	KEGG	Tyrosine metabolism	7987
query_1	TRUE	0.00203334	200	1283	52	0.04053	0.26	KEGG:04510	KEGG	Focal adhesion	7987
query_1	TRUE	0.00227017	89	1283	28	0.0218239	0.314607	KEGG:04727	KEGG	GABAergic synapse	7987
query_1	TRUE	0.0022839	98	1283	30	0.0233827	0.306122	KEGG:04925	KEGG	Aldosterone synthesis and secretion	7987
query_1	TRUE	0.00245871	64	1283	22	0.0171473	0.34375	KEGG:04927	KEGG	Cortisol synthesis and secretion	7987
query_1	TRUE	0.00322751	78	1283	25	0.0194856	0.320513	KEGG:00983	KEGG	Drug metabolism - other enzymes	7987
query_1	TRUE	0.00346426	147	1283	40	0.0311769	0.272109	KEGG:04072	KEGG	Phospholipase D signaling pathway	7987
query_1	TRUE	0.00465364	528	1283	113	0.0880748	0.214015	KEGG:05200	KEGG	Pathways in cancer	7987
query_1	TRUE	0.00513847	85	1283	26	0.020265	0.305882	KEGG:04742	KEGG	Taste transduction	7987
query_1	TRUE	0.00739432	87	1283	26	0.020265	0.298851	KEGG:04260	KEGG	Cardiac muscle contraction	7987
query_1	TRUE	0.00813143	106	1283	30	0.0233827	0.283019	KEGG:04928	KEGG	Parathyroid hormone synthesis, secretion and action	7987
query_1	TRUE	0.00828701	154	1283	40	0.0311769	0.25974	KEGG:04921	KEGG	Oxytocin signaling pathway	7987
query_1	TRUE	0.0112445	113	1283	31	0.0241621	0.274336	KEGG:04725	KEGG	Cholinergic synapse	7987
query_1	TRUE	0.0118322	162	1283	41	0.0319564	0.253086	KEGG:04630	KEGG	JAK-STAT signaling pathway	7987
query_1	TRUE	0.0124988	148	1283	38	0.0296181	0.256757	KEGG:04723	KEGG	Retrograde endocannabinoid signaling	7987
query_1	TRUE	0.0124988	86	1283	25	0.0194856	0.290698	KEGG:04911	KEGG	Insulin secretion	7987
query_1	TRUE	0.018057	93	1283	26	0.020265	0.27957	KEGG:04970	KEGG	Salivary secretion	7987
query_1	TRUE	0.0191324	75	1283	22	0.0171473	0.293333	KEGG:03320	KEGG	PPAR signaling pathway	7987
query_1	TRUE	0.0191324	137	1283	35	0.0272798	0.255474	KEGG:04915	KEGG	Estrogen signaling pathway	7987
query_1	TRUE	0.0208817	128	1283	33	0.025721	0.257812	KEGG:04926	KEGG	Relaxin signaling pathway	7987
query_1	TRUE	0.0215792	293	1283	65	0.0506625	0.221843	KEGG:04060	KEGG	Cytokine-cytokine receptor interaction	7987
query_1	TRUE	0.0253397	77	1283	22	0.0171473	0.285714	KEGG:05412	KEGG	Arrhythmogenic right ventricular cardiomyopathy	7987
query_1	TRUE	0.0308597	69	1283	20	0.0155885	0.289855	KEGG:05031	KEGG	Amphetamine addiction	7987
query_1	TRUE	0.0311658	88	1283	24	0.0187062	0.272727	KEGG:04540	KEGG	Gap junction	7987
query_1	TRUE	0.0311658	88	1283	24	0.0187062	0.272727	KEGG:04512	KEGG	ECM-receptor interaction	7987
query_1	TRUE	0.0341272	118	1283	30	0.0233827	0.254237	KEGG:04935	KEGG	Growth hormone synthesis, secretion and action	7987
query_1	TRUE	0.0341272	43	1283	14	0.0109119	0.325581	KEGG:04975	KEGG	Fat digestion and absorption	7987
query_1	TRUE	0.0426902	181	1283	42	0.0327358	0.232044	KEGG:04360	KEGG	Axon guidance	7987
query_1	TRUE	0.0460706	49	1283	15	0.0116913	0.306122	KEGG:05030	KEGG	Cocaine addiction	7987
query_1	TRUE	0.0461258	36	1283	12	0.00935308	0.333333	KEGG:00500	KEGG	Starch and sucrose metabolism	7987
query_1	TRUE	0.0461258	131	1283	32	0.0249415	0.244275	KEGG:04728	KEGG	Dopaminergic synapse	7987
query_1	TRUE	0.0480465	45	1283	14	0.0109119	0.311111	KEGG:02010	KEGG	ABC transporters	7987
query_1	TRUE	4.45417e-43	2572	1990	583	0.292965	0.226672	MIRNA:hsa-miR-335-5p	MIRNA	hsa-miR-335-5p	14849
query_1	TRUE	0.0084953	452	1990	94	0.0472362	0.207965	MIRNA:hsa-miR-6867-5p	MIRNA	hsa-miR-6867-5p	14849
query_1	TRUE	0.0191787	411	1990	85	0.0427136	0.206813	MIRNA:hsa-miR-574-5p	MIRNA	hsa-miR-574-5p	14849
query_1	TRUE	4.96458e-49	522	1679	225	0.134008	0.431034	REAC:R-HSA-418555	REAC	G alpha (s) signalling events	10531
query_1	TRUE	3.56677e-45	380	1679	179	0.106611	0.471053	REAC:R-HSA-381753	REAC	Olfactory Signaling Pathway	10531
query_1	TRUE	1.14539e-39	1088	1679	343	0.204288	0.315257	REAC:R-HSA-388396	REAC	GPCR downstream signalling	10531
query_1	TRUE	4.46811e-37	1158	1679	352	0.209649	0.303972	REAC:R-HSA-372790	REAC	Signaling by GPCR	10531
query_1	TRUE	8.76974e-16	2687	1679	574	0.34187	0.213621	REAC:R-HSA-162582	REAC	Signal Transduction	10531
query_1	TRUE	2.06115e-08	205	1679	70	0.0416915	0.341463	REAC:R-HSA-397014	REAC	Muscle contraction	10531
query_1	TRUE	1.46192e-06	400	1679	108	0.064324	0.27	REAC:R-HSA-112316	REAC	Neuronal System	10531
query_1	TRUE	6.13756e-05	105	1679	38	0.0226325	0.361905	REAC:R-HSA-2672351	REAC	Stimuli-sensing channels	10531
query_1	TRUE	8.20356e-05	215	1679	63	0.0375223	0.293023	REAC:R-HSA-6805567	REAC	Keratinization	10531
query_1	TRUE	0.000112946	31	1679	17	0.0101251	0.548387	REAC:R-HSA-445095	REAC	Interaction between L1 and Ankyrins	10531
query_1	TRUE	0.000186397	86	1679	32	0.019059	0.372093	REAC:R-HSA-6794362	REAC	Protein-protein interactions at synapses	10531
query_1	TRUE	0.00019341	42	1679	20	0.0119119	0.47619	REAC:R-HSA-5576892	REAC	Phase 0 - rapid depolarisation	10531
query_1	TRUE	0.00037804	298	1679	78	0.0464562	0.261745	REAC:R-HSA-1474244	REAC	Extracellular matrix organization	10531
query_1	TRUE	0.00124724	137	1679	42	0.0250149	0.306569	REAC:R-HSA-5576891	REAC	Cardiac conduction	10531
query_1	TRUE	0.00127131	133	1679	41	0.0244193	0.308271	REAC:R-HSA-9660821	REAC	ADORA2B mediated anti-inflammatory cytokines production	10531
query_1	TRUE	0.00141407	217	1679	59	0.03514	0.271889	REAC:R-HSA-211859	REAC	Biological oxidations	10531
query_1	TRUE	0.00194923	105	1679	34	0.0202501	0.32381	REAC:R-HSA-211945	REAC	Phase I - Functionalization of compounds	10531
query_1	TRUE	0.00238506	1069	1679	218	0.129839	0.203929	REAC:R-HSA-1266738	REAC	Developmental Biology	10531
query_1	TRUE	0.00249753	42	1679	18	0.0107207	0.428571	REAC:R-HSA-375280	REAC	Amine ligand-binding receptors	10531
query_1	TRUE	0.00345084	259	1679	66	0.0393091	0.254826	REAC:R-HSA-112315	REAC	Transmission across Chemical Synapses	10531
query_1	TRUE	0.00363141	36	1679	16	0.00952948	0.444444	REAC:R-HSA-390522	REAC	Striated Muscle Contraction	10531
query_1	TRUE	0.0054278	459	1679	104	0.0619416	0.22658	REAC:R-HSA-500792	REAC	GPCR ligand binding	10531
query_1	TRUE	0.00665833	182	1679	49	0.029184	0.269231	REAC:R-HSA-983712	REAC	Ion channel transport	10531
query_1	TRUE	0.00698082	24	1679	12	0.00714711	0.5	REAC:R-HSA-8963743	REAC	Digestion and absorption	10531
query_1	TRUE	0.00733633	328	1679	78	0.0464562	0.237805	REAC:R-HSA-373076	REAC	Class A/1 (Rhodopsin-like receptors)	10531
query_1	TRUE	0.00733633	21	1679	11	0.00655152	0.52381	REAC:R-HSA-392154	REAC	Nitric oxide stimulates guanylate cyclase	10531
query_1	TRUE	0.0075196	15	1679	9	0.00536033	0.6	REAC:R-HSA-418457	REAC	cGMP effects	10531
query_1	TRUE	0.0075196	54	1679	20	0.0119119	0.37037	REAC:R-HSA-112040	REAC	G-protein mediated events	10531
query_1	TRUE	0.0083587	124	1679	36	0.0214413	0.290323	REAC:R-HSA-381426	REAC	Regulation of Insulin-like Growth Factor (IGF) transport and uptake by Insulin-like Growth Factor Binding Proteins (IGFBPs)	10531
query_1	TRUE	0.0083587	39	1679	16	0.00952948	0.410256	REAC:R-HSA-140877	REAC	Formation of Fibrin Clot (Clotting Cascade)	10531
query_1	TRUE	0.00896583	59	1679	21	0.0125074	0.355932	REAC:R-HSA-375165	REAC	NCAM signaling for neurite out-growth	10531
query_1	TRUE	0.00972367	10	1679	7	0.00416915	0.7	REAC:R-HSA-418890	REAC	Role of second messengers in netrin-1 signaling	10531
query_1	TRUE	0.0109612	60	1679	21	0.0125074	0.35	REAC:R-HSA-977443	REAC	GABA receptor activation	10531
query_1	TRUE	0.0109612	19	1679	10	0.00595593	0.526316	REAC:R-HSA-388844	REAC	Receptor-type tyrosine-protein phosphatases	10531
query_1	TRUE	0.0114418	16	1679	9	0.00536033	0.5625	REAC:R-HSA-9018677	REAC	Biosynthesis of DHA-derived SPMs	10531
query_1	TRUE	0.0135764	8	1679	6	0.00357356	0.75	REAC:R-HSA-189085	REAC	Digestion of dietary carbohydrate	10531
query_1	TRUE	0.0135764	53	1679	19	0.0113163	0.358491	REAC:R-HSA-112043	REAC	PLC beta mediated events	10531
query_1	TRUE	0.0135764	196	1679	50	0.0297796	0.255102	REAC:R-HSA-112314	REAC	Neurotransmitter receptors and postsynaptic signal transmission	10531
query_1	TRUE	0.0135764	8	1679	6	0.00357356	0.75	REAC:R-HSA-5632681	REAC	Ligand-receptor interactions	10531
query_1	TRUE	0.0135764	49	1679	18	0.0107207	0.367347	REAC:R-HSA-373752	REAC	Netrin-1 signaling	10531
query_1	TRUE	0.0155922	20	1679	10	0.00595593	0.5	REAC:R-HSA-8935690	REAC	Digestion	10531
query_1	TRUE	0.0175629	11	1679	7	0.00416915	0.636364	REAC:R-HSA-2534343	REAC	Interaction With Cumulus Cells And The Zona Pellucida	10531
query_1	TRUE	0.01816	14	1679	8	0.00476474	0.571429	REAC:R-HSA-170670	REAC	Adenylate cyclase inhibitory pathway	10531
query_1	TRUE	0.0181612	401	1679	89	0.0530077	0.221945	REAC:R-HSA-418594	REAC	G alpha (i) signalling events	10531
query_1	TRUE	0.0224181	4	1679	4	0.00238237	1	REAC:R-HSA-399710	REAC	Activation of AMPA receptors	10531
query_1	TRUE	0.0241452	56	1679	19	0.0113163	0.339286	REAC:R-HSA-6794361	REAC	Neurexins and neuroligins	10531
query_1	TRUE	0.0242714	119	1679	33	0.0196546	0.277311	REAC:R-HSA-373760	REAC	L1CAM interactions	10531
query_1	TRUE	0.0261648	18	1679	9	0.00536033	0.5	REAC:R-HSA-9018678	REAC	Biosynthesis of specialized proresolving mediators (SPMs)	10531
query_1	TRUE	0.0282442	9	1679	6	0.00357356	0.666667	REAC:R-HSA-390696	REAC	Adrenoceptors	10531
query_1	TRUE	0.0305355	12	1679	7	0.00416915	0.583333	REAC:R-HSA-71384	REAC	Ethanol oxidation	10531
query_1	TRUE	0.0305355	22	1679	10	0.00595593	0.454545	REAC:R-HSA-912694	REAC	Regulation of IFNA signaling	10531
query_1	TRUE	0.0305355	37	1679	14	0.0083383	0.378378	REAC:R-HSA-2129379	REAC	Molecules associated with elastic fibres	10531
query_1	TRUE	0.0305355	41	1679	15	0.00893389	0.365854	REAC:R-HSA-383280	REAC	Nuclear Receptor transcription pathway	10531
query_1	TRUE	0.0305355	107	1679	30	0.0178678	0.280374	REAC:R-HSA-163685	REAC	Integration of energy metabolism	10531
query_1	TRUE	0.0396819	38	1679	14	0.0083383	0.368421	REAC:R-HSA-445355	REAC	Smooth Muscle Contraction	10531
query_1	TRUE	0.0396819	42	1679	15	0.00893389	0.357143	REAC:R-HSA-419037	REAC	NCAM1 interactions	10531
query_1	TRUE	0.0423042	7	1679	5	0.00297796	0.714286	REAC:R-HSA-1247673	REAC	Erythrocytes take up oxygen and release carbon dioxide	10531
query_1	TRUE	0.0423042	16	1679	8	0.00476474	0.5	REAC:R-HSA-5083625	REAC	Defective GALNT3 causes familial hyperphosphatemic tumoral calcinosis (HFTC)	10531
query_1	TRUE	0.0423042	16	1679	8	0.00476474	0.5	REAC:R-HSA-5083636	REAC	Defective GALNT12 causes colorectal cancer 1 (CRCS1)	10531
query_1	TRUE	0.0423042	23	1679	10	0.00595593	0.434783	REAC:R-HSA-193368	REAC	Synthesis of bile acids and bile salts via 7alpha-hydroxycholesterol	10531
query_1	TRUE	0.0459771	43	1679	15	0.00893389	0.348837	REAC:R-HSA-991365	REAC	Activation of GABAB receptors	10531
query_1	TRUE	0.0459771	43	1679	15	0.00893389	0.348837	REAC:R-HSA-977444	REAC	GABA B receptor activation	10531
query_1	TRUE	0.0459771	78	1679	23	0.0136986	0.294872	REAC:R-HSA-422356	REAC	Regulation of insulin secretion	10531
query_1	TRUE	0.0467188	10	1679	6	0.00357356	0.6	REAC:R-HSA-170660	REAC	Adenylate cyclase activating pathway	10531
query_1	TRUE	0.0467188	718	1679	143	0.0851697	0.199164	REAC:R-HSA-382551	REAC	Transport of small molecules	10531
query_1	TRUE	0.0478465	65	1679	20	0.0119119	0.307692	REAC:R-HSA-3906995	REAC	Diseases associated with O-glycosylation of proteins	10531
query_1	TRUE	0.0478465	20	1679	9	0.00536033	0.45	REAC:R-HSA-438066	REAC	Unblocking of NMDA receptors, glutamate binding and activation	10531
query_1	TRUE	1.91397e-41	5064	3005	1092	0.363394	0.21564	TF:M02087_1	TF	Factor: CDX-2; motif: TTTATN; match class: 1	19728
query_1	TRUE	4.54692e-30	4494	3005	948	0.315474	0.210948	TF:M07270_1	TF	Factor: TEF-3; motif: GNTATTTTT; match class: 1	19728
query_1	TRUE	6.47537e-30	12160	3005	2142	0.712812	0.176151	TF:M02027_1	TF	Factor: PARP; motif: TTTCYN; match class: 1	19728
query_1	TRUE	4.94133e-28	3970	3005	848	0.282196	0.213602	TF:M01393_1	TF	Factor: Msx-2; motif: NNNGACYAATTAGYNNT; match class: 1	19728
query_1	TRUE	7.78351e-28	8372	3005	1565	0.520799	0.186933	TF:M01292_1	TF	Factor: HOXA13; motif: ATAAMA; match class: 1	19728
query_1	TRUE	3.09891e-27	7862	3005	1482	0.493178	0.188502	TF:M04556	TF	Factor: SRY; motif: AACAATNNNCATTGTT	19728
query_1	TRUE	3.97546e-26	4938	3005	1003	0.333777	0.203119	TF:M10088	TF	Factor: TBP; motif: MTATAAAARS	19728
query_1	TRUE	7.82383e-26	6131	3005	1198	0.398669	0.1954	TF:M04556_1	TF	Factor: SRY; motif: AACAATNNNCATTGTT; match class: 1	19728
query_1	TRUE	9.38164e-25	6129	3005	1192	0.396672	0.194485	TF:M10690_1	TF	Factor: HOXA7; motif: GYMATTAN; match class: 1	19728
query_1	TRUE	1.45958e-24	4748	3005	963	0.320466	0.202822	TF:M11932	TF	Factor: Oct3; motif: NNTTATGYWAATKARN	19728
query_1	TRUE	1.09515e-23	4679	3005	947	0.315141	0.202394	TF:M00252	TF	Factor: TATA; motif: STATAAAWRNNNNNN	19728
query_1	TRUE	1.10187e-23	10277	3005	1832	0.609651	0.178262	TF:M03560_1	TF	Factor: PMX1; motif: TAATHA; match class: 1	19728
query_1	TRUE	1.29445e-23	6623	3005	1265	0.420965	0.191001	TF:M11929	TF	Factor: POU3F1; motif: NTAATKWATGCNN	19728
query_1	TRUE	1.62945e-23	1825	3005	442	0.147088	0.242192	TF:M00672_1	TF	Factor: TEF; motif: ATGTTWAYATAA; match class: 1	19728
query_1	TRUE	1.72631e-23	5018	3005	1002	0.333444	0.199681	TF:M04557_1	TF	Factor: SRY; motif: TCAATAMCATTGA; match class: 1	19728
query_1	TRUE	2.05049e-23	5329	3005	1053	0.350416	0.197598	TF:M11896	TF	Factor: Oct-2; motif: NTATGCWAATN	19728
query_1	TRUE	2.48019e-23	3695	3005	777	0.258569	0.210284	TF:M08836	TF	Factor: OCT-2; motif: ATGMATATGCWAAT	19728
query_1	TRUE	4.09203e-23	10031	3005	1791	0.596007	0.178547	TF:M02087	TF	Factor: CDX-2; motif: TTTATN	19728
query_1	TRUE	1.88772e-22	12010	3005	2080	0.69218	0.173189	TF:M03564_1	TF	Factor: SATB1; motif: NTTTAT; match class: 1	19728
query_1	TRUE	2.29838e-22	6038	3005	1163	0.387022	0.192613	TF:M01124	TF	Factor: Oct-4; motif: ATTGWSWTGCWAAWN	19728
query_1	TRUE	6.01583e-22	5130	3005	1012	0.336772	0.197271	TF:M11909	TF	Factor: POU3F2; motif: NTATGCWAATKAG	19728
query_1	TRUE	7.83344e-22	4887	3005	971	0.323128	0.19869	TF:M01408	TF	Factor: Brn-3c; motif: NNTTATTAATKANKNC	19728
query_1	TRUE	8.74363e-22	5832	3005	1126	0.374709	0.193073	TF:M01654_1	TF	Factor: DRI1; motif: AATTAA; match class: 1	19728
query_1	TRUE	8.74363e-22	5832	3005	1126	0.374709	0.193073	TF:M03546_1	TF	Factor: Dlx-5; motif: AATTAN; match class: 1	19728
query_1	TRUE	1.68663e-21	3275	3005	695	0.231281	0.212214	TF:M04079	TF	Factor: POU3F2; motif: WTATGCWAATKA	19728
query_1	TRUE	3.20176e-21	4746	3005	944	0.314143	0.198904	TF:M07450	TF	Factor: HOXA9; motif: DTGATTTATKGY	19728
query_1	TRUE	3.35459e-21	3192	3005	679	0.225957	0.212719	TF:M11935	TF	Factor: Oct3; motif: NNWTATGYWAATKANN	19728
query_1	TRUE	8.08471e-21	6511	3005	1230	0.409318	0.188911	TF:M02097_1	TF	Factor: LHX3; motif: ATTAAW; match class: 1	19728
query_1	TRUE	1.4239e-20	2138	3005	488	0.162396	0.228251	TF:M00622_1	TF	Factor: C/EBPgamma; motif: YTBATTTCARAAW; match class: 1	19728
query_1	TRUE	1.431e-20	7079	3005	1319	0.438935	0.186326	TF:M03813_1	TF	Factor: BRN1; motif: HAATGCN; match class: 1	19728
query_1	TRUE	1.669e-20	4127	3005	836	0.278203	0.202568	TF:M00102	TF	Factor: CDP; motif: NWNATCGATTANYNN	19728
query_1	TRUE	2.9218e-20	3467	3005	722	0.240266	0.208249	TF:M04555_1	TF	Factor: SRY; motif: AACAATANCATTGTT; match class: 1	19728
query_1	TRUE	3.72562e-20	8320	3005	1511	0.502829	0.181611	TF:M01883	TF	Factor: IRF-4; motif: GAAARTA	19728
query_1	TRUE	4.11651e-20	8097	3005	1476	0.491181	0.18229	TF:M08976_1	TF	Factor: SRY; motif: AACAATNR; match class: 1	19728
query_1	TRUE	4.1214e-20	6253	3005	1184	0.39401	0.189349	TF:M11635	TF	Factor: Sox-10; motif: NACAATRNNNNYATTGTN	19728
query_1	TRUE	5.34331e-20	4748	3005	937	0.311814	0.197346	TF:M10033	TF	Factor: POU2F1; motif: ANKNRWATGSAAWYAW	19728
query_1	TRUE	5.34331e-20	11112	3005	1933	0.643261	0.173956	TF:M03555_1	TF	Factor: NFATc2; motif: GGAAAA; match class: 1	19728
query_1	TRUE	5.34331e-20	11112	3005	1933	0.643261	0.173956	TF:M01281_1	TF	Factor: NFATc2; motif: GGAAAA; match class: 1	19728
query_1	TRUE	5.34331e-20	11112	3005	1933	0.643261	0.173956	TF:M01886_1	TF	Factor: NFATc3; motif: GGAAAA; match class: 1	19728
query_1	TRUE	5.66741e-20	6973	3005	1298	0.431947	0.186147	TF:M00423	TF	Factor: FOXJ2; motif: AYMATAATATTTKN	19728
query_1	TRUE	6.74349e-20	3649	3005	751	0.249917	0.20581	TF:M10031_1	TF	Factor: ipf1; motif: TGATTGATK; match class: 1	19728
query_1	TRUE	7.77912e-20	11588	3005	2002	0.666223	0.172765	TF:M01230_1	TF	Factor: ZNF333; motif: ATAAT; match class: 1	19728
query_1	TRUE	8.00192e-20	6062	3005	1151	0.383028	0.189871	TF:M11950	TF	Factor: Pit-1; motif: NTAATGAKATGCRN	19728
query_1	TRUE	8.00192e-20	2948	3005	629	0.209318	0.213365	TF:M01883_1	TF	Factor: IRF-4; motif: GAAARTA; match class: 1	19728
query_1	TRUE	1.19363e-19	5766	3005	1102	0.366722	0.19112	TF:M01388_1	TF	Factor: Dlx-5; motif: NNRGYAATTRNYKNNN; match class: 1	19728
query_1	TRUE	1.26258e-19	7571	3005	1390	0.462562	0.183595	TF:M02112	TF	Factor: OC-2; motif: TCAATA	19728
query_1	TRUE	1.26258e-19	2755	3005	594	0.197671	0.215608	TF:M00423_1	TF	Factor: FOXJ2; motif: AYMATAATATTTKN; match class: 1	19728
query_1	TRUE	1.35986e-19	8033	3005	1462	0.486522	0.181999	TF:M08201	TF	Factor: CDP:HOXA13; motif: ATCGATYAYSYCRTAAA	19728
query_1	TRUE	1.35986e-19	3144	3005	662	0.2203	0.21056	TF:M08201_1	TF	Factor: CDP:HOXA13; motif: ATCGATYAYSYCRTAAA; match class: 1	19728
query_1	TRUE	2.53967e-19	3244	3005	678	0.225624	0.209001	TF:M04635	TF	Factor: TEF-5; motif: AAAAATAT	19728
query_1	TRUE	2.63655e-19	4170	3005	836	0.278203	0.20048	TF:M01878_1	TF	Factor: GATA-3; motif: AGATAA; match class: 1	19728
query_1	TRUE	3.64741e-19	5570	3005	1067	0.355075	0.191562	TF:M11585	TF	Factor: FOXJ2; motif: NNTGTTGTAAAYAN	19728
query_1	TRUE	3.85374e-19	1309	3005	326	0.108486	0.249045	TF:M11896_1	TF	Factor: Oct-2; motif: NTATGCWAATN; match class: 1	19728
query_1	TRUE	3.85374e-19	1523	3005	367	0.12213	0.240972	TF:M11950_1	TF	Factor: Pit-1; motif: NTAATGAKATGCRN; match class: 1	19728
query_1	TRUE	4.26721e-19	4392	3005	872	0.290183	0.198543	TF:M01321_1	TF	Factor: HOXC-8; motif: NNNNNGTAATTANNNT; match class: 1	19728
query_1	TRUE	5.65482e-19	3157	3005	661	0.219967	0.209376	TF:M11507	TF	Factor: CDP; motif: NTATTGATYR	19728
query_1	TRUE	8.36539e-19	3185	3005	665	0.221298	0.208791	TF:M09938	TF	Factor: GATA-3; motif: NNAGATAANAN	19728
query_1	TRUE	1.14623e-18	1757	3005	409	0.136106	0.232783	TF:M01124_1	TF	Factor: Oct-4; motif: ATTGWSWTGCWAAWN; match class: 1	19728
query_1	TRUE	1.14623e-18	2271	3005	503	0.167388	0.221488	TF:M07599_1	TF	Factor: beta-catenin; motif: CTTTGATN; match class: 1	19728
query_1	TRUE	1.17802e-18	6115	3005	1152	0.383361	0.188389	TF:M04328	TF	Factor: GSX2; motif: NNYMATTANN	19728
query_1	TRUE	1.27827e-18	5690	3005	1083	0.360399	0.190334	TF:M01420	TF	Factor: Ncx; motif: NAATNAATTAATAANWW	19728
query_1	TRUE	1.49162e-18	4119	3005	823	0.273877	0.199806	TF:M00349	TF	Factor: GATA-2; motif: ASAGATAANA	19728
query_1	TRUE	1.99182e-18	5642	3005	1074	0.357404	0.190358	TF:M01321	TF	Factor: HOXC-8; motif: NNNNNGTAATTANNNT	19728
query_1	TRUE	2.23718e-18	5601	3005	1067	0.355075	0.190502	TF:M11899	TF	Factor: Oct-2; motif: NTGCATATGCAN	19728
query_1	TRUE	2.65652e-18	4420	3005	872	0.290183	0.197285	TF:M03952	TF	Factor: CDP; motif: TRATCRATAN	19728
query_1	TRUE	2.96401e-18	5729	3005	1087	0.36173	0.189736	TF:M04349	TF	Factor: HOXB5; motif: NNYMATTANN	19728
query_1	TRUE	2.99421e-18	3429	3005	704	0.234276	0.205308	TF:M01275_1	TF	Factor: ipf1; motif: CATTAR; match class: 1	19728
query_1	TRUE	3.0761e-18	8744	3005	1563	0.520133	0.178751	TF:M01393	TF	Factor: Msx-2; motif: NNNGACYAATTAGYNNT	19728
query_1	TRUE	3.39326e-18	3954	3005	793	0.263894	0.200556	TF:M10750_1	TF	Factor: gsh-1; motif: NTMATNRN; match class: 1	19728
query_1	TRUE	3.39326e-18	4949	3005	959	0.319135	0.193777	TF:M01324	TF	Factor: BRN1; motif: NANNTATGCATAATNNA	19728
query_1	TRUE	5.21166e-18	1447	3005	348	0.115807	0.240498	TF:M10034_1	TF	Factor: Oct-2; motif: NYATGCAAATN; match class: 1	19728
query_1	TRUE	5.21166e-18	5801	3005	1097	0.365058	0.189105	TF:M11635_1	TF	Factor: Sox-10; motif: NACAATRNNNNYATTGTN; match class: 1	19728
query_1	TRUE	5.82556e-18	4879	3005	946	0.314809	0.193892	TF:M07120	TF	Factor: Oct-2; motif: NNNATTTGCATRT	19728
query_1	TRUE	7.42356e-18	7756	3005	1407	0.46822	0.181408	TF:M02265	TF	Factor: NFATc2; motif: TTTTCCA	19728
query_1	TRUE	8.69341e-18	1003	3005	261	0.0868552	0.260219	TF:M04063_1	TF	Factor: Pax-4; motif: SWAATWAN; match class: 1	19728
query_1	TRUE	9.01334e-18	2151	3005	477	0.158735	0.221757	TF:M01420_1	TF	Factor: Ncx; motif: NAATNAATTAATAANWW; match class: 1	19728
query_1	TRUE	9.48958e-18	5923	3005	1115	0.371048	0.188249	TF:M00672	TF	Factor: TEF; motif: ATGTTWAYATAA	19728
query_1	TRUE	9.63169e-18	1801	3005	413	0.137438	0.229317	TF:M11929_1	TF	Factor: POU3F1; motif: NTAATKWATGCNN; match class: 1	19728
query_1	TRUE	1.02176e-17	4167	3005	826	0.274875	0.198224	TF:M04073	TF	Factor: POU2F2; motif: NWTRMATATKCAWN	19728
query_1	TRUE	1.1298e-17	4558	3005	891	0.296506	0.19548	TF:M01884_1	TF	Factor: IRF-7; motif: AAGWGAA; match class: 1	19728
query_1	TRUE	1.49152e-17	7102	3005	1302	0.433278	0.183329	TF:M04555	TF	Factor: SRY; motif: AACAATANCATTGTT	19728
query_1	TRUE	1.8872e-17	4584	3005	894	0.297504	0.195026	TF:M00795	TF	Factor: Octamer; motif: TNATTTGCATN	19728
query_1	TRUE	1.99914e-17	3148	3005	651	0.216639	0.206798	TF:M01010_1	TF	Factor: HMGIY; motif: NNKKNAWTTTNYTNN; match class: 1	19728
query_1	TRUE	2.01912e-17	6416	3005	1192	0.396672	0.185786	TF:M11600	TF	Factor: TCF-1; motif: ASATCAAAG	19728
query_1	TRUE	2.38337e-17	4198	3005	829	0.275874	0.197475	TF:M03950	TF	Factor: CDP; motif: ATCGATNNNNNATCRAT	19728
query_1	TRUE	2.41677e-17	4306	3005	847	0.281864	0.196702	TF:M11571	TF	Factor: HNF-3alpha; motif: YTRWGTMAATATTTRCWYWN	19728
query_1	TRUE	2.80722e-17	1119	3005	282	0.0938436	0.252011	TF:M07120_1	TF	Factor: Oct-2; motif: NNNATTTGCATRT; match class: 1	19728
query_1	TRUE	3.22545e-17	5710	3005	1077	0.358403	0.188616	TF:M04327	TF	Factor: GSX1; motif: NNYMATTANN	19728
query_1	TRUE	3.43989e-17	5336	3005	1016	0.338103	0.190405	TF:M03559	TF	Factor: Pit-1; motif: NNWWATTCAT	19728
query_1	TRUE	3.62884e-17	7749	3005	1401	0.466223	0.180798	TF:M02025_1	TF	Factor: MEF-2C; motif: TATTTWT; match class: 1	19728
query_1	TRUE	3.7524e-17	6384	3005	1185	0.394343	0.18562	TF:M04715	TF	Factor: Oct-2; motif: ATTTGCA	19728
query_1	TRUE	3.92396e-17	7064	3005	1293	0.430283	0.183041	TF:M10065	TF	Factor: Sox-10; motif: MAANRRNNNCWTTGTT	19728
query_1	TRUE	5.58107e-17	5541	3005	1048	0.348752	0.189136	TF:M04327_1	TF	Factor: GSX1; motif: NNYMATTANN; match class: 1	19728
query_1	TRUE	5.79515e-17	3326	3005	679	0.225957	0.204149	TF:M01438	TF	Factor: ipf1; motif: NNRNTAATTAGYNCAN	19728
query_1	TRUE	5.86906e-17	9535	3005	1675	0.557404	0.175669	TF:M10031	TF	Factor: ipf1; motif: TGATTGATK	19728
query_1	TRUE	6.00674e-17	6889	3005	1264	0.420632	0.183481	TF:M00622	TF	Factor: C/EBPgamma; motif: YTBATTTCARAAW	19728
query_1	TRUE	6.03145e-17	4749	3005	918	0.305491	0.193304	TF:M00802	TF	Factor: Pit-1; motif: NMTTCATAAWTATWNMNA	19728
query_1	TRUE	6.65093e-17	2427	3005	522	0.17371	0.21508	TF:M02112_1	TF	Factor: OC-2; motif: TCAATA; match class: 1	19728
query_1	TRUE	6.74356e-17	3947	3005	784	0.260899	0.198632	TF:M04078	TF	Factor: POU3F2; motif: NWTGCATAAWTTA	19728
query_1	TRUE	6.7679e-17	7056	3005	1290	0.429285	0.182823	TF:M03581	TF	Factor: TBP; motif: NGNNTATAAAA	19728
query_1	TRUE	6.7679e-17	6377	3005	1182	0.393344	0.185354	TF:M12193	TF	Factor: GATA-3; motif: AGATAAGATCT	19728
query_1	TRUE	8.94776e-17	3257	3005	666	0.221631	0.204483	TF:M04069	TF	Factor: POU1F1; motif: AWTATGCWAATKAG	19728
query_1	TRUE	9.39819e-17	5330	3005	1012	0.336772	0.189869	TF:M10691	TF	Factor: HOXB6; motif: NTAATKRC	19728
query_1	TRUE	9.39819e-17	1930	3005	432	0.14376	0.223834	TF:M01408_1	TF	Factor: Brn-3c; motif: NNTTATTAATKANKNC; match class: 1	19728
query_1	TRUE	1.20492e-16	7671	3005	1385	0.460899	0.18055	TF:M01388	TF	Factor: Dlx-5; motif: NNRGYAATTRNYKNNN	19728
query_1	TRUE	1.2944e-16	1127	3005	281	0.0935108	0.249335	TF:M11932_1	TF	Factor: Oct3; motif: NNTTATGYWAATKARN; match class: 1	19728
query_1	TRUE	1.7625e-16	4087	3005	805	0.267887	0.196966	TF:M11913	TF	Factor: POU3F2; motif: TAATTANNNNNNTAATTA	19728
query_1	TRUE	1.80288e-16	9100	3005	1605	0.53411	0.176374	TF:M03854_1	TF	Factor: SRY; motif: TTGTTT; match class: 1	19728
query_1	TRUE	1.80288e-16	9100	3005	1605	0.53411	0.176374	TF:M03823_1	TF	Factor: FOXO1A; motif: AAACAA; match class: 1	19728
query_1	TRUE	1.93766e-16	10088	3005	1755	0.584027	0.173969	TF:M04557	TF	Factor: SRY; motif: TCAATAMCATTGA	19728
query_1	TRUE	2.89669e-16	10149	3005	1763	0.586689	0.173712	TF:M01878	TF	Factor: GATA-3; motif: AGATAA	19728
query_1	TRUE	2.89669e-16	5374	3005	1016	0.338103	0.189058	TF:M10864	TF	Factor: EVX1; motif: NTCATTAN	19728
query_1	TRUE	3.17223e-16	3710	3005	740	0.246256	0.199461	TF:M01452	TF	Factor: HOXA5; motif: ANGNTAATTANCNNAN	19728
query_1	TRUE	3.21195e-16	1768	3005	400	0.133111	0.226244	TF:M04715_1	TF	Factor: Oct-2; motif: ATTTGCA; match class: 1	19728
query_1	TRUE	3.41848e-16	10219	3005	1773	0.590017	0.1735	TF:M07270	TF	Factor: TEF-3; motif: GNTATTTTT	19728
query_1	TRUE	3.59538e-16	12037	3005	2043	0.679867	0.169727	TF:M01337_1	TF	Factor: HOXA3; motif: NNNNRNTAATTARY; match class: 1	19728
query_1	TRUE	4.23318e-16	8042	3005	1439	0.478869	0.178936	TF:M02116_1	TF	Factor: Sox-10; motif: NACAAWG; match class: 1	19728
query_1	TRUE	4.93936e-16	1185	3005	290	0.0965058	0.244726	TF:M11909_1	TF	Factor: POU3F2; motif: NTATGCWAATKAG; match class: 1	19728
query_1	TRUE	5.02629e-16	1051	3005	264	0.0878536	0.251189	TF:M00252_1	TF	Factor: TATA; motif: STATAAAWRNNNNNN; match class: 1	19728
query_1	TRUE	5.56761e-16	4939	3005	943	0.31381	0.190929	TF:M04360	TF	Factor: HOXD11; motif: NNYMATAAAA	19728
query_1	TRUE	5.67805e-16	3278	3005	665	0.221298	0.202868	TF:M01400	TF	Factor: Dlx-3; motif: NNNNNATAATTACMNNN	19728
query_1	TRUE	5.82113e-16	8023	3005	1435	0.477537	0.178861	TF:M10750	TF	Factor: gsh-1; motif: NTMATNRN	19728
query_1	TRUE	5.85578e-16	5154	3005	978	0.325458	0.189756	TF:M11632	TF	Factor: Sox-10; motif: AACAATRGNCYATTGTT	19728
query_1	TRUE	5.86313e-16	16381	3005	2651	0.882196	0.161834	TF:M02027	TF	Factor: PARP; motif: TTTCYN	19728
query_1	TRUE	6.05126e-16	1885	3005	420	0.139767	0.222812	TF:M08883_1	TF	Factor: FOXM1; motif: TRTTTATNN; match class: 1	19728
query_1	TRUE	8.72723e-16	1133	3005	279	0.0928453	0.246249	TF:M00802_1	TF	Factor: Pit-1; motif: NMTTCATAAWTATWNMNA; match class: 1	19728
query_1	TRUE	9.02084e-16	3532	3005	707	0.235275	0.20017	TF:M10705_1	TF	Factor: HoxA5; motif: GYMATTAS; match class: 1	19728
query_1	TRUE	9.02084e-16	3532	3005	707	0.235275	0.20017	TF:M10706	TF	Factor: HoxA5; motif: NYMATTAN	19728
query_1	TRUE	9.02084e-16	7744	3005	1390	0.462562	0.179494	TF:M07254	TF	Factor: Foxc1; motif: TTVYTTTNW	19728
query_1	TRUE	9.02084e-16	3532	3005	707	0.235275	0.20017	TF:M10703	TF	Factor: HoxA5; motif: NYAATTAN	19728
query_1	TRUE	9.02084e-16	8258	3005	1470	0.489185	0.178009	TF:M01010	TF	Factor: HMGIY; motif: NNKKNAWTTTNYTNN	19728
query_1	TRUE	9.02084e-16	3532	3005	707	0.235275	0.20017	TF:M10705	TF	Factor: HoxA5; motif: GYMATTAS	19728
query_1	TRUE	1.05486e-15	5707	3005	1066	0.354742	0.186788	TF:M09646	TF	Factor: Oct3; motif: NYWTTSWTATGCAAAT	19728
query_1	TRUE	1.05486e-15	3358	3005	677	0.225291	0.201608	TF:M07058	TF	Factor: POU2F1; motif: ATTTGCATN	19728
query_1	TRUE	1.24634e-15	3839	3005	758	0.252246	0.197447	TF:M04399	TF	Factor: MEOX2; motif: NSTAATTANN	19728
query_1	TRUE	1.2575e-15	4030	3005	790	0.262895	0.19603	TF:M04349_1	TF	Factor: HOXB5; motif: NNYMATTANN; match class: 1	19728
query_1	TRUE	1.51409e-15	2782	3005	577	0.192013	0.207405	TF:M00980	TF	Factor: TBP; motif: TTTATAN	19728
query_1	TRUE	1.5195e-15	5962	3005	1106	0.368053	0.185508	TF:M01462	TF	Factor: POU6F1; motif: NNNNATAATGAGSTNNN	19728
query_1	TRUE	1.77586e-15	5113	3005	968	0.32213	0.189321	TF:M10667	TF	Factor: NOTO; motif: NYMATTAN	19728
query_1	TRUE	2.46194e-15	2411	3005	511	0.17005	0.211945	TF:M02026_1	TF	Factor: MEF-2D; motif: WAAATAR; match class: 1	19728
query_1	TRUE	3.00959e-15	2272	3005	486	0.16173	0.213908	TF:M08822_1	TF	Factor: Msx-1; motif: WNGNAATTANV; match class: 1	19728
query_1	TRUE	3.19536e-15	6507	3005	1191	0.396339	0.183034	TF:M08404	TF	Factor: POU2F1:Gscl; motif: NNGATTANNTATKCANNNN	19728
query_1	TRUE	3.58619e-15	3429	3005	686	0.228286	0.200058	TF:M00464	TF	Factor: POU3F2; motif: TTATGYTAAT	19728
query_1	TRUE	3.91173e-15	5942	3005	1100	0.366057	0.185123	TF:M10701	TF	Factor: HOXB5; motif: GTCATTAN	19728
query_1	TRUE	8.3389e-15	6821	3005	1238	0.41198	0.181498	TF:M08822	TF	Factor: Msx-1; motif: WNGNAATTANV	19728
query_1	TRUE	8.52104e-15	3230	3005	650	0.216306	0.201238	TF:M01723	TF	Factor: SATB1; motif: AKWAWTAAHGRYMNWW	19728
query_1	TRUE	8.83821e-15	1386	3005	323	0.107488	0.233045	TF:M03559_1	TF	Factor: Pit-1; motif: NNWWATTCAT; match class: 1	19728
query_1	TRUE	9.73669e-15	5020	3005	948	0.315474	0.188845	TF:M01712_1	TF	Factor: CRX; motif: YTAATC; match class: 1	19728
query_1	TRUE	1.45479e-14	1932	3005	422	0.140433	0.218427	TF:M10065_1	TF	Factor: Sox-10; motif: MAANRRNNNCWTTGTT; match class: 1	19728
query_1	TRUE	1.45479e-14	1882	3005	413	0.137438	0.219447	TF:M08404_1	TF	Factor: POU2F1:Gscl; motif: NNGATTANNTATKCANNNN; match class: 1	19728
query_1	TRUE	1.68118e-14	3517	3005	697	0.231947	0.19818	TF:M11566	TF	Factor: HNF-3alpha; motif: NWRWGTMAAYAW	19728
query_1	TRUE	1.81442e-14	1102	3005	268	0.0891847	0.243194	TF:M10088_1	TF	Factor: TBP; motif: MTATAAAARS; match class: 1	19728
query_1	TRUE	2.23677e-14	2479	3005	518	0.172379	0.208955	TF:M10103	TF	Factor: TWIST; motif: MCATCTGKWWYYNATTA	19728
query_1	TRUE	2.3369e-14	6150	3005	1128	0.375374	0.183415	TF:M08203	TF	Factor: CDP:T-bet; motif: NTCACACNYYRATCRATM	19728
query_1	TRUE	2.3369e-14	4572	3005	872	0.290183	0.190726	TF:M00347	TF	Factor: GATA-1; motif: MNAGATAANR	19728
query_1	TRUE	2.7489e-14	3271	3005	654	0.217637	0.199939	TF:M04320	TF	Factor: EVX1; motif: NNTNATTANN	19728
query_1	TRUE	2.80607e-14	3936	3005	766	0.254908	0.194614	TF:M04279	TF	Factor: ALX3; motif: NNYAATTANN	19728
query_1	TRUE	3.55936e-14	1776	3005	392	0.130449	0.220721	TF:M10587	TF	Factor: Barx-2; motif: NWWAAYMATTAN	19728
query_1	TRUE	3.92196e-14	4496	3005	858	0.285524	0.190836	TF:M11899_1	TF	Factor: Oct-2; motif: NTGCATATGCAN; match class: 1	19728
query_1	TRUE	3.94933e-14	2174	3005	463	0.154077	0.212971	TF:M00137_1	TF	Factor: Oct-1; motif: NNNRTAATNANNN; match class: 1	19728
query_1	TRUE	4.40688e-14	3473	3005	687	0.228619	0.197812	TF:M04068	TF	Factor: POU1F1; motif: NNNATGMATAWTTAATN	19728
query_1	TRUE	5.73371e-14	2693	3005	553	0.184027	0.205347	TF:M04070	TF	Factor: POU2F1; motif: NWTATGCWAATN	19728
query_1	TRUE	5.92491e-14	4826	3005	911	0.303161	0.188769	TF:M04063	TF	Factor: Pax-4; motif: SWAATWAN	19728
query_1	TRUE	6.65838e-14	1978	3005	427	0.142097	0.215875	TF:M03581_1	TF	Factor: TBP; motif: NGNNTATAAAA; match class: 1	19728
query_1	TRUE	7.98628e-14	985	3005	243	0.0808652	0.246701	TF:M00795_1	TF	Factor: Octamer; motif: TNATTTGCATN; match class: 1	19728
query_1	TRUE	8.37327e-14	4558	3005	866	0.288186	0.189996	TF:M01362	TF	Factor: CART1; motif: NGNNYTAATTARTNNNN	19728
query_1	TRUE	8.37327e-14	1637	3005	365	0.121464	0.222969	TF:M01324_1	TF	Factor: BRN1; motif: NANNTATGCATAATNNA; match class: 1	19728
query_1	TRUE	9.24097e-14	3836	3005	746	0.248253	0.194473	TF:M04328_1	TF	Factor: GSX2; motif: NNYMATTANN; match class: 1	19728
query_1	TRUE	9.60697e-14	3308	3005	657	0.218636	0.198609	TF:M11911	TF	Factor: POU3F2; motif: NTAATGAKATGCAN	19728
query_1	TRUE	1.02323e-13	2294	3005	482	0.160399	0.210113	TF:M04442	TF	Factor: UNCX; motif: NTAATNNAATTAN	19728
query_1	TRUE	1.02629e-13	3380	3005	669	0.222629	0.197929	TF:M01464	TF	Factor: HOXA10; motif: NNNGYAATAAAATNNW	19728
query_1	TRUE	1.12117e-13	10849	3005	1849	0.615308	0.17043	TF:M03546	TF	Factor: Dlx-5; motif: AATTAN	19728
query_1	TRUE	1.12117e-13	3738	3005	729	0.242596	0.195024	TF:M11894	TF	Factor: Oct-2; motif: NNNATTATGCAW	19728
query_1	TRUE	1.12117e-13	10849	3005	1849	0.615308	0.17043	TF:M01654	TF	Factor: DRI1; motif: AATTAA	19728
query_1	TRUE	1.12295e-13	4140	3005	796	0.264892	0.192271	TF:M00210	TF	Factor: OCT-x; motif: CTNATTTGCATAY	19728
query_1	TRUE	1.12295e-13	3518	3005	692	0.230283	0.196703	TF:M01235	TF	Factor: ipf1; motif: NVSTAATTAC	19728
query_1	TRUE	1.25346e-13	2978	3005	600	0.199667	0.201478	TF:M00161	TF	Factor: Oct-1; motif: MKVATTTGCATATT	19728
query_1	TRUE	1.25346e-13	3354	3005	664	0.220965	0.197973	TF:M07428	TF	Factor: Six-3; motif: NWBTAATNYYWN	19728
query_1	TRUE	1.32774e-13	7087	3005	1271	0.422962	0.179342	TF:M04450	TF	Factor: VSX1; motif: NGCYAATTRNN	19728
query_1	TRUE	1.37485e-13	1654	3005	367	0.12213	0.221886	TF:M12193_1	TF	Factor: GATA-3; motif: AGATAAGATCT; match class: 1	19728
query_1	TRUE	1.49873e-13	1048	3005	254	0.0845258	0.242366	TF:M04360_1	TF	Factor: HOXD11; motif: NNYMATAAAA; match class: 1	19728
query_1	TRUE	1.56084e-13	6818	3005	1228	0.408652	0.180111	TF:M09930	TF	Factor: foxm1; motif: TGTTTRCTYWNN	19728
query_1	TRUE	1.59508e-13	4243	3005	812	0.270216	0.191374	TF:M00136	TF	Factor: Oct-1; motif: NNGAATATKCANNNN	19728
query_1	TRUE	1.69864e-13	5437	3005	1007	0.335108	0.185212	TF:M04335	TF	Factor: HMX3; motif: NNCAMTTAANN	19728
query_1	TRUE	1.70569e-13	823	3005	210	0.0698835	0.255164	TF:M08836_1	TF	Factor: OCT-2; motif: ATGMATATGCWAAT; match class: 1	19728
query_1	TRUE	1.70569e-13	4323	3005	825	0.274542	0.19084	TF:M04609	TF	Factor: AP-3; motif: TKGAAAKN	19728
query_1	TRUE	1.75556e-13	3508	3005	689	0.229285	0.196408	TF:M04611_1	TF	Factor: FOXM1; motif: NAGASTGATTA; match class: 1	19728
query_1	TRUE	1.75556e-13	3177	3005	633	0.210649	0.199245	TF:M11904	TF	Factor: POU3F2; motif: WTATGCWAATKAG	19728
query_1	TRUE	1.91922e-13	3255	3005	646	0.214975	0.198464	TF:M00109	TF	Factor: C/EBPbeta; motif: RNRTKDNGMAAKNN	19728
query_1	TRUE	1.95251e-13	1830	3005	398	0.132446	0.217486	TF:M10928	TF	Factor: Prop-1; motif: TAATTNNRTTA	19728
query_1	TRUE	2.2018e-13	4062	3005	781	0.2599	0.19227	TF:M08811	TF	Factor: FOXL2; motif: AGHCWAAAYAN	19728
query_1	TRUE	2.27745e-13	5685	3005	1046	0.348087	0.183993	TF:M00133	TF	Factor: Tst-1; motif: NNKGAATTAVAVTDN	19728
query_1	TRUE	2.34119e-13	4816	3005	905	0.301165	0.187915	TF:M11584	TF	Factor: FOXJ2; motif: NNTGTTGTAAAYAN	19728
query_1	TRUE	2.34529e-13	4639	3005	876	0.291514	0.188834	TF:M11632_1	TF	Factor: Sox-10; motif: AACAATRGNCYATTGTT; match class: 1	19728
query_1	TRUE	2.43736e-13	5007	3005	936	0.311481	0.186938	TF:M11567	TF	Factor: HNF-3alpha; motif: NWRTGTAAAYAN	19728
query_1	TRUE	2.43736e-13	4872	3005	914	0.30416	0.187603	TF:M03549	TF	Factor: GATA-4; motif: AGATAAN	19728
query_1	TRUE	2.46189e-13	9747	3005	1680	0.559068	0.172361	TF:M02086_1	TF	Factor: Cdx-1; motif: TTTATK; match class: 1	19728
query_1	TRUE	2.82859e-13	1779	3005	388	0.129118	0.2181	TF:M00489	TF	Factor: Nkx6-2; motif: NWADTAAWTANN	19728
query_1	TRUE	3.31175e-13	3099	3005	618	0.205657	0.199419	TF:M01412	TF	Factor: Msx-1; motif: NNNNANTAATTANTNN	19728
query_1	TRUE	3.48227e-13	1787	3005	389	0.129451	0.217683	TF:M00248	TF	Factor: Oct-1; motif: TNTATGBTAATT	19728
query_1	TRUE	3.71828e-13	6063	3005	1105	0.36772	0.182253	TF:M10034	TF	Factor: Oct-2; motif: NYATGCAAATN	19728
query_1	TRUE	4.10987e-13	5548	3005	1022	0.3401	0.184211	TF:M00805_1	TF	Factor: TCF-7; motif: TCAAAG; match class: 1	19728
query_1	TRUE	4.10987e-13	5548	3005	1022	0.3401	0.184211	TF:M03858_1	TF	Factor: TCF-3; motif: CTTTGA; match class: 1	19728
query_1	TRUE	4.53521e-13	4081	3005	782	0.260233	0.19162	TF:M08202	TF	Factor: CDP:HOXB13; motif: SYMRTAAANATYGATY	19728
query_1	TRUE	4.85032e-13	3686	3005	716	0.23827	0.194249	TF:M00991	TF	Factor: Cdx; motif: NAYNRHNARAKTHATAAA	19728
query_1	TRUE	4.88391e-13	2448	3005	505	0.168053	0.206291	TF:M04073_1	TF	Factor: POU2F2; motif: NWTRMATATKCAWN; match class: 1	19728
query_1	TRUE	4.95105e-13	6163	3005	1120	0.372712	0.18173	TF:M08928	TF	Factor: FOSB:JUND; motif: NNTNACTNATN	19728
query_1	TRUE	5.09313e-13	6101	3005	1110	0.369384	0.181937	TF:M11606	TF	Factor: LEF-1; motif: ASATCAAAG	19728
query_1	TRUE	5.16464e-13	8841	3005	1539	0.512146	0.174075	TF:M01275	TF	Factor: ipf1; motif: CATTAR	19728
query_1	TRUE	5.75951e-13	2508	3005	515	0.171381	0.205343	TF:M00138	TF	Factor: Oct-1; motif: NNNNNNNWATGCAAATNNNWNNA	19728
query_1	TRUE	6.46155e-13	1067	3005	255	0.0848586	0.238988	TF:M01438_1	TF	Factor: ipf1; motif: NNRNTAATTAGYNCAN; match class: 1	19728
query_1	TRUE	7.31989e-13	5952	3005	1085	0.361065	0.182292	TF:M11602	TF	Factor: TCF-1; motif: ASATCAAAG	19728
query_1	TRUE	8.42405e-13	9617	3005	1656	0.551082	0.172195	TF:M08520	TF	Factor: CDP:SRF; motif: NCCWTAYAAGGTMNKRATCRATN	19728
query_1	TRUE	8.98124e-13	4390	3005	831	0.276539	0.189294	TF:M01479	TF	Factor: POU6F1; motif: NNNNWTAATGAGSTNNN	19728
query_1	TRUE	9.42293e-13	10872	3005	1845	0.613977	0.169702	TF:M01884	TF	Factor: IRF-7; motif: AAGWGAA	19728
query_1	TRUE	1.05164e-12	5449	3005	1003	0.333777	0.18407	TF:M10704	TF	Factor: HoxA5; motif: RTCATTAN	19728
query_1	TRUE	1.05164e-12	5251	3005	971	0.323128	0.184917	TF:M03842	TF	Factor: POU3F1; motif: RNYBCATTTGCATTWCAA	19728
query_1	TRUE	1.1091e-12	2942	3005	588	0.195674	0.199864	TF:M11268	TF	Factor: JunD; motif: NATGASTCATS	19728
query_1	TRUE	1.26817e-12	958	3005	233	0.0775374	0.243215	TF:M03549_1	TF	Factor: GATA-4; motif: AGATAAN; match class: 1	19728
query_1	TRUE	1.46026e-12	2730	3005	551	0.183361	0.201832	TF:M00351	TF	Factor: GATA-3; motif: ANAGATMWWA	19728
query_1	TRUE	1.47402e-12	3783	3005	729	0.242596	0.192704	TF:M07257	TF	Factor: HOXA10; motif: TTATNNYWN	19728
query_1	TRUE	1.59183e-12	14195	3005	2329	0.775042	0.164072	TF:M03854	TF	Factor: SRY; motif: TTGTTT	19728
query_1	TRUE	1.59183e-12	14195	3005	2329	0.775042	0.164072	TF:M03823	TF	Factor: FOXO1A; motif: AAACAA	19728
query_1	TRUE	1.62365e-12	3911	3005	750	0.249584	0.191767	TF:M04256	TF	Factor: FOXO1; motif: GTAAACATGTTTAC	19728
query_1	TRUE	1.67494e-12	10752	3005	1825	0.607321	0.169736	TF:M10690	TF	Factor: HOXA7; motif: GYMATTAN	19728
query_1	TRUE	1.67633e-12	1349	3005	306	0.10183	0.226835	TF:M11606_1	TF	Factor: LEF-1; motif: ASATCAAAG; match class: 1	19728
query_1	TRUE	1.70972e-12	1601	3005	352	0.117138	0.219863	TF:M00421_1	TF	Factor: MEIS1B:HOXA9; motif: TGACASTTTWAYRR; match class: 1	19728
query_1	TRUE	1.79221e-12	3268	3005	642	0.213644	0.19645	TF:M10858_1	TF	Factor: En-2; motif: NTCRTTARN; match class: 1	19728
query_1	TRUE	1.8445e-12	4611	3005	865	0.287854	0.187595	TF:M07376	TF	Factor: beta-catenin; motif: CTTTGWTN	19728
query_1	TRUE	1.86234e-12	946	3005	230	0.0765391	0.243129	TF:M01400_1	TF	Factor: Dlx-3; motif: NNNNNATAATTACMNNN; match class: 1	19728
query_1	TRUE	1.86296e-12	4234	3005	803	0.267221	0.189655	TF:M11213	TF	Factor: AP-4; motif: AHCATRTGKT	19728
query_1	TRUE	1.95967e-12	4698	3005	879	0.292512	0.187101	TF:M10698	TF	Factor: HOXB5; motif: RTCRTTAN	19728
query_1	TRUE	1.95967e-12	4698	3005	879	0.292512	0.187101	TF:M10609	TF	Factor: Dlx-3; motif: NTCRTTAN	19728
query_1	TRUE	2.06764e-12	13921	3005	2289	0.76173	0.164428	TF:M03560	TF	Factor: PMX1; motif: TAATHA	19728
query_1	TRUE	2.54023e-12	4936	3005	917	0.305158	0.185778	TF:M10696	TF	Factor: HOXA6; motif: NGYMATTANN	19728
query_1	TRUE	2.66611e-12	2237	3005	464	0.154409	0.207421	TF:M10667_1	TF	Factor: NOTO; motif: NYMATTAN; match class: 1	19728
query_1	TRUE	2.72887e-12	4132	3005	785	0.261231	0.189981	TF:M11910	TF	Factor: POU3F2; motif: NTAATTTATGCRN	19728
query_1	TRUE	3.15715e-12	1498	3005	332	0.110483	0.221629	TF:M10691_1	TF	Factor: HOXB6; motif: NTAATKRC; match class: 1	19728
query_1	TRUE	3.26843e-12	4105	3005	780	0.259567	0.190012	TF:M00410	TF	Factor: Sox-9; motif: NNNNAACAATRGNN	19728
query_1	TRUE	3.36232e-12	7644	3005	1347	0.448253	0.176217	TF:M02026	TF	Factor: MEF-2D; motif: WAAATAR	19728
query_1	TRUE	3.38846e-12	1067	3005	252	0.0838602	0.236176	TF:M09623	TF	Factor: GATA-3; motif: NNAGATAANAW	19728
query_1	TRUE	3.39486e-12	2569	3005	521	0.173378	0.202803	TF:M08772_1	TF	Factor: HOXA6; motif: NYMATTAN; match class: 1	19728
query_1	TRUE	3.39486e-12	2691	3005	542	0.180366	0.201412	TF:M01872	TF	Factor: DBP; motif: TTWTGYAA	19728
query_1	TRUE	3.88433e-12	13886	3005	2282	0.759401	0.164338	TF:M08976	TF	Factor: SRY; motif: AACAATNR	19728
query_1	TRUE	4.19382e-12	13422	3005	2215	0.737105	0.165028	TF:M01292	TF	Factor: HOXA13; motif: ATAAMA	19728
query_1	TRUE	4.23033e-12	9092	3005	1570	0.522463	0.172679	TF:M03849_1	TF	Factor: Sox-4; motif: AACAAA; match class: 1	19728
query_1	TRUE	4.30309e-12	5280	3005	971	0.323128	0.183902	TF:M00291	TF	Factor: Freac-3; motif: NNNNNGTAAATAAACA	19728
query_1	TRUE	4.55702e-12	3528	3005	683	0.227288	0.193594	TF:M02115	TF	Factor: Prx2; motif: TYAWAKTAA	19728
query_1	TRUE	4.78314e-12	3499	3005	678	0.225624	0.19377	TF:M08948	TF	Factor: LEF-1; motif: NNNCTTTGAT	19728
query_1	TRUE	5.2007e-12	2558	3005	518	0.172379	0.202502	TF:M04344	TF	Factor: HOXA2; motif: NNTMATTANN	19728
query_1	TRUE	5.20577e-12	3716	3005	714	0.237604	0.192142	TF:M11604	TF	Factor: LEF-1; motif: ASATCAAAG	19728
query_1	TRUE	5.46008e-12	8041	3005	1407	0.46822	0.174978	TF:M07599	TF	Factor: beta-catenin; motif: CTTTGATN	19728
query_1	TRUE	6.17033e-12	1429	3005	318	0.105824	0.222533	TF:M01452_1	TF	Factor: HOXA5; motif: ANGNTAATTANCNNAN; match class: 1	19728
query_1	TRUE	7.04323e-12	3938	3005	750	0.249584	0.190452	TF:M04378	TF	Factor: IRX5; motif: NWACAYRACAWN	19728
query_1	TRUE	9.42409e-12	9405	3005	1615	0.537438	0.171717	TF:M04611	TF	Factor: FOXM1; motif: NAGASTGATTA	19728
query_1	TRUE	1.06072e-11	4743	3005	881	0.293178	0.185747	TF:M03548	TF	Factor: FOXL2; motif: TWAKACWAMTTT	19728
query_1	TRUE	1.11755e-11	1452	3005	321	0.106822	0.221074	TF:M01462_1	TF	Factor: POU6F1; motif: NNNNATAATGAGSTNNN; match class: 1	19728
query_1	TRUE	1.12588e-11	1825	3005	388	0.129118	0.212603	TF:M09639	TF	Factor: nanog; motif: NYWTTGWNATGCAAATN	19728
query_1	TRUE	1.27185e-11	2612	3005	525	0.174709	0.200995	TF:M07254_1	TF	Factor: Foxc1; motif: TTVYTTTNW; match class: 1	19728
query_1	TRUE	1.32946e-11	1290	3005	291	0.0968386	0.225581	TF:M07378	TF	Factor: cdx; motif: NNTTTATNN	19728
query_1	TRUE	1.44323e-11	3321	3005	645	0.214642	0.194219	TF:M10694	TF	Factor: HOXA6; motif: NGYMATTANN	19728
query_1	TRUE	1.53509e-11	3531	3005	680	0.22629	0.19258	TF:M10873	TF	Factor: alx3; motif: NYAATTAN	19728
query_1	TRUE	1.58776e-11	6679	3005	1190	0.396007	0.17817	TF:M00421	TF	Factor: MEIS1B:HOXA9; motif: TGACASTTTWAYRR	19728
query_1	TRUE	1.68083e-11	1298	3005	292	0.0971714	0.224961	TF:M00133_1	TF	Factor: Tst-1; motif: NNKGAATTAVAVTDN; match class: 1	19728
query_1	TRUE	1.70096e-11	4154	3005	783	0.260566	0.188493	TF:M10712	TF	Factor: HOXD4; motif: NYMATTAN	19728
query_1	TRUE	1.73211e-11	1540	3005	336	0.111814	0.218182	TF:M04075	TF	Factor: POU2F3; motif: ATGMATATKCAW	19728
query_1	TRUE	1.74596e-11	3396	3005	657	0.218636	0.193463	TF:M04347	TF	Factor: HOXB2; motif: NNTMATTANN	19728
query_1	TRUE	1.78938e-11	3510	3005	676	0.224958	0.192593	TF:M07278	TF	Factor: Dlx-3; motif: NTAATTNVN	19728
query_1	TRUE	1.80824e-11	1524	3005	333	0.110815	0.218504	TF:M04625_1	TF	Factor: PLZF; motif: ACTKTANNTN; match class: 1	19728
query_1	TRUE	1.89622e-11	4412	3005	825	0.274542	0.18699	TF:M01404	TF	Factor: HOXD13; motif: NNNYYAATAAAANNNN	19728
query_1	TRUE	1.94143e-11	2613	3005	524	0.174376	0.200536	TF:M00131	TF	Factor: HNF3beta; motif: KGNANTRTTTRYTTW	19728
query_1	TRUE	1.94692e-11	3812	3005	726	0.241597	0.190451	TF:M11633	TF	Factor: Sox-10; motif: AACAATGGNCCATTGTT	19728
query_1	TRUE	1.96723e-11	4145	3005	781	0.2599	0.18842	TF:M03872	TF	Factor: HNF-1beta; motif: GTTAATYATTAACY	19728
query_1	TRUE	1.98439e-11	684	3005	175	0.0582363	0.255848	TF:M02115_1	TF	Factor: Prx2; motif: TYAWAKTAA; match class: 1	19728
query_1	TRUE	2.09884e-11	4402	3005	823	0.273877	0.18696	TF:M08794_1	TF	Factor: MEL1; motif: GARGAT; match class: 1	19728
query_1	TRUE	2.19532e-11	1209	3005	275	0.0915141	0.227461	TF:M03842_1	TF	Factor: POU3F1; motif: RNYBCATTTGCATTWCAA; match class: 1	19728
query_1	TRUE	2.23844e-11	1367	3005	304	0.101165	0.222385	TF:M11585_1	TF	Factor: FOXJ2; motif: NNTGTTGTAAAYAN; match class: 1	19728
query_1	TRUE	2.26587e-11	1204	3005	274	0.0911814	0.227575	TF:M07046	TF	Factor: LEF-1; motif: ANNWWCAAAGN	19728
query_1	TRUE	2.26587e-11	3080	3005	603	0.200666	0.195779	TF:M11609	TF	Factor: LEF-1; motif: ASATCAAAG	19728
query_1	TRUE	2.32217e-11	9107	3005	1566	0.521131	0.171956	TF:M02006	TF	Factor: GATA-5; motif: TATCTN	19728
query_1	TRUE	2.44426e-11	3660	3005	700	0.232945	0.191257	TF:M00195	TF	Factor: Oct-1; motif: NNNNATGCAAATNAN	19728
query_1	TRUE	2.48548e-11	2379	3005	483	0.160732	0.203026	TF:M04072	TF	Factor: POU2F2; motif: NTATGCWAATN	19728
query_1	TRUE	2.52416e-11	4565	3005	849	0.282529	0.18598	TF:M04610	TF	Factor: CDP; motif: NNNNWGWYMAATR	19728
query_1	TRUE	2.52416e-11	3769	3005	718	0.238935	0.190501	TF:M11508	TF	Factor: CDP; motif: NNATYGATYN	19728
query_1	TRUE	2.59822e-11	2982	3005	586	0.195008	0.196512	TF:M04321	TF	Factor: EVX2; motif: NNTNATTANN	19728
query_1	TRUE	2.76072e-11	3226	3005	627	0.208652	0.194358	TF:M04446	TF	Factor: VAX1; motif: YTAATTAN	19728
query_1	TRUE	2.76072e-11	3226	3005	627	0.208652	0.194358	TF:M10673	TF	Factor: Emx-2; motif: YTAATTAN	19728
query_1	TRUE	2.87565e-11	1580	3005	342	0.11381	0.216456	TF:M11600_1	TF	Factor: TCF-1; motif: ASATCAAAG; match class: 1	19728
query_1	TRUE	2.95423e-11	2376	3005	482	0.160399	0.202862	TF:M01011	TF	Factor: HNF-1; motif: NNNNGNTAAWNATTAACYNNN	19728
query_1	TRUE	3.21777e-11	3973	3005	751	0.249917	0.189026	TF:M10941	TF	Factor: VSX1; motif: CYAATTRN	19728
query_1	TRUE	3.412e-11	9457	3005	1618	0.538436	0.17109	TF:M00148	TF	Factor: SRY; motif: AAACWAM	19728
query_1	TRUE	4.2113e-11	5833	3005	1052	0.350083	0.180353	TF:M11000	TF	Factor: LIM-1; motif: NYAATTAN	19728
query_1	TRUE	4.45824e-11	2475	3005	498	0.165724	0.201212	TF:M10871	TF	Factor: ARX; motif: NYAATTAN	19728
query_1	TRUE	4.45824e-11	2475	3005	498	0.165724	0.201212	TF:M10869	TF	Factor: Prrxl1; motif: YYAATTAN	19728
query_1	TRUE	4.45824e-11	2475	3005	498	0.165724	0.201212	TF:M04447	TF	Factor: VAX2; motif: YTAATTAN	19728
query_1	TRUE	4.99829e-11	1953	3005	407	0.135441	0.208397	TF:M04279_1	TF	Factor: ALX3; motif: NNYAATTANN; match class: 1	19728
query_1	TRUE	5.00209e-11	7650	3005	1338	0.445258	0.174902	TF:M09855	TF	Factor: FOXP1; motif: CTGTTTNYTYTKN	19728
query_1	TRUE	5.42899e-11	6854	3005	1213	0.403661	0.176977	TF:M00137	TF	Factor: Oct-1; motif: NNNRTAATNANNN	19728
query_1	TRUE	5.6853e-11	5846	3005	1053	0.350416	0.180123	TF:M11985	TF	Factor: NFATc2; motif: TTTTCCATGGAAAA	19728
query_1	TRUE	6.04378e-11	3882	3005	734	0.24426	0.189078	TF:M01137	TF	Factor: FOXO3A; motif: TRTAAACAANWN	19728
query_1	TRUE	6.05528e-11	4399	3005	819	0.272546	0.186179	TF:M00148_1	TF	Factor: SRY; motif: AAACWAM; match class: 1	19728
query_1	TRUE	6.19103e-11	2364	3005	478	0.159068	0.2022	TF:M01368	TF	Factor: Oct-2; motif: NNNTATGCAAATNNNN	19728
query_1	TRUE	6.39191e-11	1809	3005	381	0.126789	0.210614	TF:M00941	TF	Factor: MEF-2; motif: RGCTATWTTTAR	19728
query_1	TRUE	6.42698e-11	6801	3005	1204	0.400666	0.177033	TF:M08883	TF	Factor: FOXM1; motif: TRTTTATNN	19728
query_1	TRUE	6.43102e-11	6314	3005	1127	0.375042	0.178492	TF:M07419	TF	Factor: FOXP3; motif: NNNVAAACANWD	19728
query_1	TRUE	6.65171e-11	4072	3005	765	0.254576	0.187868	TF:M07301	TF	Factor: NFATc4; motif: NGGAAAAN	19728
query_1	TRUE	6.82114e-11	2026	3005	419	0.139434	0.206811	TF:M02265_1	TF	Factor: NFATc2; motif: TTTTCCA; match class: 1	19728
query_1	TRUE	7.13724e-11	3620	3005	690	0.229617	0.190608	TF:M11952	TF	Factor: Pit-1; motif: NTAATTTATGCRN	19728
query_1	TRUE	7.81519e-11	3161	3005	613	0.203993	0.193926	TF:M08902	TF	Factor: TCF7RELATED; motif: NANNWWCAAAGN	19728
query_1	TRUE	7.99768e-11	3460	3005	663	0.220632	0.191618	TF:M01362_1	TF	Factor: CART1; motif: NGNNYTAATTARTNNNN; match class: 1	19728
query_1	TRUE	7.99768e-11	3514	3005	672	0.223627	0.191235	TF:M07988	TF	Factor: EMX1; motif: NNTAATKANN	19728
query_1	TRUE	8.06778e-11	1801	3005	379	0.126123	0.210439	TF:M08375	TF	Factor: meis1:Prrxl1; motif: TGACANTAATTN	19728
query_1	TRUE	9.31193e-11	3643	3005	693	0.230616	0.190228	TF:M10717	TF	Factor: HOXC4; motif: NTMATTAN	19728
query_1	TRUE	9.36125e-11	1786	3005	376	0.125125	0.210526	TF:M00729	TF	Factor: Cdx-2; motif: ANANTTTTATKRCC	19728
query_1	TRUE	9.40464e-11	641	3005	164	0.0545757	0.25585	TF:M00464_1	TF	Factor: POU3F2; motif: TTATGYTAAT; match class: 1	19728
query_1	TRUE	9.42905e-11	4280	3005	798	0.265557	0.186449	TF:M12208	TF	Factor: GATA-6; motif: WGATAACGATCW	19728
query_1	TRUE	9.79456e-11	1357	3005	299	0.0995008	0.220339	TF:M11949_1	TF	Factor: Pit-1; motif: NTAATTTATKCGY; match class: 1	19728
query_1	TRUE	9.89902e-11	2482	3005	497	0.165391	0.200242	TF:M03874	TF	Factor: Hoxa9; motif: ATYAATDACATC	19728
query_1	TRUE	1.03139e-10	3603	3005	686	0.228286	0.190397	TF:M04082	TF	Factor: POU3F3; motif: WTNAATAWKNAW	19728
query_1	TRUE	1.06055e-10	1647	3005	351	0.116805	0.213115	TF:M08817_1	TF	Factor: HOXD13; motif: WNNAATAAWAY; match class: 1	19728
query_1	TRUE	1.13787e-10	3150	3005	610	0.202995	0.193651	TF:M11286	TF	Factor: Fra-1; motif: NATGAWTCAYN	19728
query_1	TRUE	1.20364e-10	2040	3005	420	0.139767	0.205882	TF:M07456	TF	Factor: HOX; motif: TTWATKNN	19728
query_1	TRUE	1.21236e-10	3062	3005	595	0.198003	0.194317	TF:M01868	TF	Factor: C/EBPepsilon; motif: HAANMTTKCNWMAC	19728
query_1	TRUE	1.23557e-10	3963	3005	745	0.24792	0.187989	TF:M01255	TF	Factor: ipf1; motif: RNWCATTAANWN	19728
query_1	TRUE	1.37511e-10	1019	3005	236	0.0785358	0.2316	TF:M10033_1	TF	Factor: POU2F1; motif: ANKNRWATGSAAWYAW; match class: 1	19728
query_1	TRUE	1.38345e-10	2751	3005	542	0.180366	0.197019	TF:M11958	TF	Factor: POU6F1; motif: NTAATGAKATGNNN	19728
query_1	TRUE	1.40074e-10	1854	3005	387	0.128785	0.208738	TF:M10147_1	TF	Factor: ZNF394; motif: NRARWRGAANNNAMWGNAAK; match class: 1	19728
query_1	TRUE	1.43571e-10	4835	3005	887	0.295175	0.183454	TF:M11897	TF	Factor: Oct-2; motif: NNNATTATGCAN	19728
query_1	TRUE	1.5624e-10	4327	3005	804	0.267554	0.18581	TF:M07038	TF	Factor: DBP; motif: TTRCATAANN	19728
query_1	TRUE	1.72905e-10	1948	3005	403	0.13411	0.206879	TF:M01357	TF	Factor: Pbx1; motif: NYAYMCATCAAWNWNNN	19728
query_1	TRUE	1.84395e-10	3105	3005	601	0.2	0.193559	TF:M02006_1	TF	Factor: GATA-5; motif: TATCTN; match class: 1	19728
query_1	TRUE	2.05904e-10	1939	3005	401	0.133444	0.206808	TF:M07298	TF	Factor: Msx-1; motif: AHAWWTSMYYCAATTAN	19728
query_1	TRUE	2.07122e-10	3280	3005	630	0.209651	0.192073	TF:M08520_1	TF	Factor: CDP:SRF; motif: NCCWTAYAAGGTMNKRATCRATN; match class: 1	19728
query_1	TRUE	2.28164e-10	4709	3005	865	0.287854	0.183691	TF:M07457	TF	Factor: Hoxa9; motif: NTTAAWTAMA	19728
query_1	TRUE	2.42421e-10	3879	3005	729	0.242596	0.187935	TF:M10713	TF	Factor: HOXD4; motif: RTCRTTAN	19728
query_1	TRUE	2.43252e-10	11176	3005	1870	0.622296	0.167323	TF:M01712	TF	Factor: CRX; motif: YTAATC	19728
query_1	TRUE	2.55305e-10	2773	3005	544	0.181032	0.196177	TF:M04312	TF	Factor: EMX1; motif: NNTAATTANN	19728
query_1	TRUE	2.59132e-10	2149	3005	437	0.145424	0.20335	TF:M03561	TF	Factor: POU2F1; motif: NNATTTGCATNN	19728
query_1	TRUE	2.61105e-10	3917	3005	735	0.244592	0.187644	TF:M10739	TF	Factor: HOXB2; motif: RTCATTAN	19728
query_1	TRUE	2.61105e-10	2603	3005	515	0.171381	0.197849	TF:M04633	TF	Factor: TCF-4; motif: NNWTCAAAGN	19728
query_1	TRUE	2.61105e-10	15872	3005	2549	0.848253	0.160597	TF:M03564	TF	Factor: SATB1; motif: NTTTAT	19728
query_1	TRUE	2.68507e-10	1648	3005	349	0.11614	0.211772	TF:M08928_1	TF	Factor: FOSB:JUND; motif: NNTNACTNATN; match class: 1	19728
query_1	TRUE	2.8014e-10	773	3005	188	0.0625624	0.243208	TF:M00347_1	TF	Factor: GATA-1; motif: MNAGATAANR; match class: 1	19728
query_1	TRUE	2.94544e-10	2128	3005	433	0.144093	0.203477	TF:M10703_1	TF	Factor: HoxA5; motif: NYAATTAN; match class: 1	19728
query_1	TRUE	2.97871e-10	1097	3005	249	0.0828619	0.226983	TF:M00291_1	TF	Factor: Freac-3; motif: NNNNNGTAAATAAACA; match class: 1	19728
query_1	TRUE	2.98373e-10	3269	3005	627	0.208652	0.191802	TF:M04450_1	TF	Factor: VSX1; motif: NGCYAATTRNN; match class: 1	19728
query_1	TRUE	3.03322e-10	4298	3005	797	0.265225	0.185435	TF:M10036	TF	Factor: Oct3; motif: CYWTTSWNATGCAAAT	19728
query_1	TRUE	3.428e-10	3158	3005	608	0.202329	0.192527	TF:M11930	TF	Factor: POU3F1; motif: NTAATGANATGCRN	19728
query_1	TRUE	3.64342e-10	3857	3005	724	0.240932	0.187711	TF:M11515	TF	Factor: DMRT1; motif: NNNNGCTACATN	19728
query_1	TRUE	3.70292e-10	3519	3005	668	0.222296	0.189827	TF:M11611	TF	Factor: LEF-1; motif: ASATCAAAG	19728
query_1	TRUE	3.86694e-10	4138	3005	770	0.25624	0.18608	TF:M09929	TF	Factor: FOXK1; motif: TGTTTNCNNT	19728
query_1	TRUE	3.91304e-10	2167	3005	439	0.14609	0.202584	TF:M09855_1	TF	Factor: FOXP1; motif: CTGTTTNYTYTKN; match class: 1	19728
query_1	TRUE	3.92228e-10	844	3005	201	0.0668885	0.238152	TF:M04610_1	TF	Factor: CDP; motif: NNNNWGWYMAATR; match class: 1	19728
query_1	TRUE	4.06175e-10	1242	3005	275	0.0915141	0.221417	TF:M01301	TF	Factor: MEF-2A; motif: YTAAAAATARCY	19728
query_1	TRUE	4.06175e-10	2185	3005	442	0.147088	0.202288	TF:M01431	TF	Factor: Barx-2; motif: TAANTAATTANTKNTN	19728
query_1	TRUE	4.17548e-10	5673	3005	1018	0.338769	0.179447	TF:M08817	TF	Factor: HOXD13; motif: WNNAATAAWAY	19728
query_1	TRUE	4.26368e-10	940	3005	219	0.0728785	0.232979	TF:M00102_1	TF	Factor: CDP; motif: NWNATCGATTANYNN; match class: 1	19728
query_1	TRUE	4.32707e-10	8537	3005	1467	0.488186	0.17184	TF:M04053	TF	Factor: NFATc1; motif: TTTTCCATGGAAAN	19728
query_1	TRUE	4.37366e-10	2140	3005	434	0.144426	0.202804	TF:M10679	TF	Factor: HPX42B; motif: NNYAATTANN	19728
query_1	TRUE	4.87355e-10	504	3005	134	0.0445923	0.265873	TF:M01723_1	TF	Factor: SATB1; motif: AKWAWTAAHGRYMNWW; match class: 1	19728
query_1	TRUE	4.92355e-10	3736	3005	703	0.233943	0.188169	TF:M07425	TF	Factor: Msx-2; motif: TAATTAN	19728
query_1	TRUE	4.93125e-10	3147	3005	605	0.201331	0.192247	TF:M00463	TF	Factor: POU3F2; motif: ATGMATWWATTCAT	19728
query_1	TRUE	5.0636e-10	3652	3005	689	0.229285	0.188664	TF:M11570	TF	Factor: HNF-3alpha; motif: CNYTAAGTAAACAAAN	19728
query_1	TRUE	5.0636e-10	1941	3005	399	0.132779	0.205564	TF:M07079	TF	Factor: Cdx-2; motif: NNGYMATAAAA	19728
query_1	TRUE	5.59636e-10	4091	3005	761	0.253245	0.186018	TF:M11264_1	TF	Factor: c-Jun; motif: NATGASTCATN; match class: 1	19728
query_1	TRUE	5.59636e-10	3660	3005	690	0.229617	0.188525	TF:M07035	TF	Factor: Beta-catenin; motif: GNNNNCTTTGWTGNY	19728
query_1	TRUE	5.91433e-10	2162	3005	437	0.145424	0.202128	TF:M01351	TF	Factor: hoxa9; motif: NCGGYCATWAAAWTANW	19728
query_1	TRUE	6.11014e-10	3698	3005	696	0.231614	0.18821	TF:M11908	TF	Factor: POU3F2; motif: TAATKAGNNNNTAATKA	19728
query_1	TRUE	6.15139e-10	2836	3005	552	0.183694	0.19464	TF:M10706_1	TF	Factor: HoxA5; motif: NYMATTAN; match class: 1	19728
query_1	TRUE	6.18175e-10	1620	3005	342	0.11381	0.211111	TF:M11571_1	TF	Factor: HNF-3alpha; motif: YTRWGTMAATATTTRCWYWN; match class: 1	19728
query_1	TRUE	6.29146e-10	2872	3005	558	0.185691	0.19429	TF:M00436	TF	Factor: ipf1; motif: GHNNTAATGACM	19728
query_1	TRUE	6.57004e-10	3627	3005	684	0.227621	0.188586	TF:M04384	TF	Factor: LBX2; motif: NNYAATTANN	19728
query_1	TRUE	6.66465e-10	2974	3005	575	0.191348	0.193342	TF:M10707	TF	Factor: HoxA5; motif: RTCATTAN	19728
query_1	TRUE	6.66465e-10	1259	3005	277	0.0921797	0.220016	TF:M11602_1	TF	Factor: TCF-1; motif: ASATCAAAG; match class: 1	19728
query_1	TRUE	7.74492e-10	2045	3005	416	0.138436	0.203423	TF:M01125	TF	Factor: Oct-4; motif: YWTTSTNATGCAAAT	19728
query_1	TRUE	7.74492e-10	4835	3005	881	0.293178	0.182213	TF:M12192	TF	Factor: GATA-3; motif: AGATAACGATCW	19728
query_1	TRUE	7.91898e-10	2983	3005	576	0.191681	0.193094	TF:M00095_1	TF	Factor: CDP; motif: CCAATAATCGAT; match class: 1	19728
query_1	TRUE	8.89022e-10	2736	3005	534	0.177704	0.195175	TF:M04317	TF	Factor: EN1; motif: TAATTRSNYAATTA	19728
query_1	TRUE	8.9356e-10	3985	3005	742	0.246922	0.186198	TF:M01307	TF	Factor: Oct3; motif: NATGCAANNN	19728
query_1	TRUE	8.9356e-10	1213	3005	268	0.0891847	0.22094	TF:M11567_1	TF	Factor: HNF-3alpha; motif: NWRTGTAAAYAN; match class: 1	19728
query_1	TRUE	8.94601e-10	1535	3005	326	0.108486	0.212378	TF:M03950_1	TF	Factor: CDP; motif: ATCGATNNNNNATCRAT; match class: 1	19728
query_1	TRUE	9.57346e-10	5580	3005	1000	0.332779	0.179211	TF:M11949	TF	Factor: Pit-1; motif: NTAATTTATKCGY	19728
query_1	TRUE	1.00093e-09	2269	3005	454	0.151082	0.200088	TF:M10663	TF	Factor: LBX2; motif: NYYAATTANN	19728
query_1	TRUE	1.0096e-09	1447	3005	310	0.103161	0.214236	TF:M09646_1	TF	Factor: Oct3; motif: NYWTTSWTATGCAAAT; match class: 1	19728
query_1	TRUE	1.02218e-09	806	3005	192	0.0638935	0.238213	TF:M10130	TF	Factor: ZNF214; motif: NCMTTYYTRWGSMNNTTGATGA	19728
query_1	TRUE	1.02372e-09	6558	3005	1155	0.384359	0.176121	TF:M03138_1	TF	Factor: Sox-10; motif: CWTTGT; match class: 1	19728
query_1	TRUE	1.02372e-09	6558	3005	1155	0.384359	0.176121	TF:M03857_1	TF	Factor: TCF-1; motif: CTTTGW; match class: 1	19728
query_1	TRUE	1.10358e-09	812	3005	193	0.0642263	0.237685	TF:M07603	TF	Factor: Dlx-3; motif: NNNYNAATTAAN	19728
query_1	TRUE	1.13225e-09	4051	3005	752	0.25025	0.185633	TF:M10716	TF	Factor: HOXA4; motif: RTMATTAN	19728
query_1	TRUE	1.22673e-09	2006	3005	408	0.135774	0.20339	TF:M11913_1	TF	Factor: POU3F2; motif: TAATTANNNNNNTAATTA; match class: 1	19728
query_1	TRUE	1.25128e-09	9099	3005	1549	0.515474	0.170238	TF:M07476	TF	Factor: Lhx8; motif: TGATTG	19728
query_1	TRUE	1.25386e-09	5424	3005	974	0.324126	0.179572	TF:M04300	TF	Factor: Dlx-2; motif: NYAATTAN	19728
query_1	TRUE	1.27557e-09	2784	3005	541	0.180033	0.194325	TF:M04354	TF	Factor: HOXC11; motif: NGYMATAAAAN	19728
query_1	TRUE	1.3552e-09	888	3005	207	0.0688852	0.233108	TF:M04317_1	TF	Factor: EN1; motif: TAATTRSNYAATTA; match class: 1	19728
query_1	TRUE	1.36931e-09	2187	3005	439	0.14609	0.200732	TF:M00160	TF	Factor: SRY; motif: NWWAACAAWANN	19728
query_1	TRUE	1.41216e-09	3407	3005	645	0.214642	0.189316	TF:M10710	TF	Factor: HOXD4; motif: RTCRTTAN	19728
query_1	TRUE	1.413e-09	8549	3005	1464	0.487188	0.171248	TF:M00095	TF	Factor: CDP; motif: CCAATAATCGAT	19728
query_1	TRUE	1.42002e-09	3215	3005	613	0.203993	0.190669	TF:M01356	TF	Factor: PMX2B; motif: NNNAATTAATTAANNNG	19728
query_1	TRUE	1.47961e-09	2328	3005	463	0.154077	0.198883	TF:M10526	TF	Factor: Blimp-1; motif: RRGNGAAAGNRANNN	19728
query_1	TRUE	1.85339e-09	2838	3005	549	0.182696	0.193446	TF:M04077	TF	Factor: POU3F1; motif: WTGMATAAWTNA	19728
query_1	TRUE	1.94837e-09	2934	3005	565	0.18802	0.19257	TF:M08726	TF	Factor: meis1:Sox-2; motif: TGACAKGTTAACAATGT	19728
query_1	TRUE	1.96407e-09	5804	3005	1033	0.34376	0.177981	TF:M07255	TF	Factor: Foxm1; motif: NTGTTTRT	19728
query_1	TRUE	1.9718e-09	2526	3005	496	0.165058	0.196358	TF:M04299	TF	Factor: Dlx-1; motif: NNTAATTANN	19728
query_1	TRUE	2.00984e-09	983	3005	224	0.0745424	0.227874	TF:M11584_1	TF	Factor: FOXJ2; motif: NNTGTTGTAAAYAN; match class: 1	19728
query_1	TRUE	2.04376e-09	3120	3005	596	0.198336	0.191026	TF:M11213_1	TF	Factor: AP-4; motif: AHCATRTGKT; match class: 1	19728
query_1	TRUE	2.09684e-09	1722	3005	357	0.118802	0.207317	TF:M07605	TF	Factor: LEF-1; motif: NANNWWCAAAGNN	19728
query_1	TRUE	2.24863e-09	4791	3005	870	0.289517	0.18159	TF:M04737	TF	Factor: HNF-3alpha; motif: WRWGTAAAC	19728
query_1	TRUE	2.30539e-09	2306	3005	458	0.152413	0.198612	TF:M01017	TF	Factor: Pbx-1; motif: NNATCAATCANN	19728
query_1	TRUE	2.40392e-09	1269	3005	276	0.0918469	0.217494	TF:M04335_1	TF	Factor: HMX3; motif: NNCAMTTAANN; match class: 1	19728
query_1	TRUE	2.48451e-09	937	3005	215	0.0715474	0.229456	TF:M04303	TF	Factor: Dlx-5; motif: NYAATTAN	19728
query_1	TRUE	2.48451e-09	937	3005	215	0.0715474	0.229456	TF:M10620	TF	Factor: Dlx-2; motif: NYAATTAN	19728
query_1	TRUE	2.48451e-09	937	3005	215	0.0715474	0.229456	TF:M10602	TF	Factor: Dlx-7; motif: NYAATTAN	19728
query_1	TRUE	2.48451e-09	937	3005	215	0.0715474	0.229456	TF:M10604	TF	Factor: Dlx-7; motif: NYAATTAN	19728
query_1	TRUE	2.48451e-09	937	3005	215	0.0715474	0.229456	TF:M10619	TF	Factor: Dlx-2; motif: NYAATTAN	19728
query_1	TRUE	2.66657e-09	1443	3005	307	0.102163	0.212751	TF:M04256_1	TF	Factor: FOXO1; motif: GTAAACATGTTTAC; match class: 1	19728
query_1	TRUE	2.75251e-09	2709	3005	526	0.175042	0.194168	TF:M12333	TF	Factor: ZBTB20; motif: NNAAYGTATRKN	19728
query_1	TRUE	2.95141e-09	3217	3005	611	0.203328	0.189929	TF:M11211	TF	Factor: AP-4; motif: ANCATATGNT	19728
query_1	TRUE	3.05742e-09	2340	3005	463	0.154077	0.197863	TF:M11286_1	TF	Factor: Fra-1; motif: NATGAWTCAYN; match class: 1	19728
query_1	TRUE	3.12633e-09	12851	3005	2108	0.701498	0.164034	TF:M02025	TF	Factor: MEF-2C; motif: TATTTWT	19728
query_1	TRUE	3.19093e-09	1113	3005	247	0.0821963	0.221923	TF:M09819_1	TF	Factor: SOX10; motif: NNAACAAAGNN; match class: 1	19728
query_1	TRUE	3.2108e-09	5898	3005	1046	0.348087	0.177348	TF:M04053_1	TF	Factor: NFATc1; motif: TTTTCCATGGAAAN; match class: 1	19728
query_1	TRUE	3.34603e-09	3891	3005	722	0.240266	0.185556	TF:M04249	TF	Factor: FOXJ3; motif: RTAAACAA	19728
query_1	TRUE	3.44203e-09	1396	3005	298	0.0991681	0.213467	TF:M10701_1	TF	Factor: HOXB5; motif: GTCATTAN; match class: 1	19728
query_1	TRUE	3.75095e-09	4377	3005	801	0.266556	0.183002	TF:M00346	TF	Factor: GATA-1; motif: NCWGATAACA	19728
query_1	TRUE	3.90084e-09	3548	3005	665	0.221298	0.18743	TF:M10685	TF	Factor: HOXB7; motif: NGYAATTANN	19728
query_1	TRUE	3.92106e-09	1353	3005	290	0.0965058	0.214339	TF:M11136	TF	Factor: NeuroD; motif: AAWTANNNYRMCATATGKY	19728
query_1	TRUE	4.0817e-09	530	3005	136	0.0452579	0.256604	TF:M11935_1	TF	Factor: Oct3; motif: NNWTATGYWAATKANN; match class: 1	19728
query_1	TRUE	4.0817e-09	2651	3005	515	0.171381	0.194266	TF:M04403	TF	Factor: MNX1; motif: NNYAATTAAN	19728
query_1	TRUE	4.11458e-09	4601	3005	837	0.278536	0.181917	TF:M11264	TF	Factor: c-Jun; motif: NATGASTCATN	19728
query_1	TRUE	4.28075e-09	3411	3005	642	0.213644	0.188215	TF:M00042	TF	Factor: Sox-5; motif: NNAACAATNN	19728
query_1	TRUE	4.2886e-09	11844	3005	1958	0.651581	0.165316	TF:M02097	TF	Factor: LHX3; motif: ATTAAW	19728
query_1	TRUE	4.30902e-09	627	3005	155	0.0515807	0.247209	TF:M09929_1	TF	Factor: FOXK1; motif: TGTTTNCNNT; match class: 1	19728
query_1	TRUE	4.35745e-09	3309	3005	625	0.207987	0.188879	TF:M11207	TF	Factor: AP-4; motif: ANCATATGNT	19728
query_1	TRUE	4.36687e-09	9166	3005	1554	0.517138	0.16954	TF:M10858	TF	Factor: En-2; motif: NTCRTTARN	19728
query_1	TRUE	4.46891e-09	3733	3005	695	0.231281	0.186177	TF:M11209	TF	Factor: AP-4; motif: ANCATATGNT	19728
query_1	TRUE	4.49803e-09	16231	3005	2590	0.861897	0.159571	TF:M03555	TF	Factor: NFATc2; motif: GGAAAA	19728
query_1	TRUE	4.49803e-09	16231	3005	2590	0.861897	0.159571	TF:M01281	TF	Factor: NFATc2; motif: GGAAAA	19728
query_1	TRUE	4.49803e-09	16231	3005	2590	0.861897	0.159571	TF:M01886	TF	Factor: NFATc3; motif: GGAAAA	19728
query_1	TRUE	4.56049e-09	2394	3005	471	0.156739	0.196742	TF:M11207_1	TF	Factor: AP-4; motif: ANCATATGNT; match class: 1	19728
query_1	TRUE	4.57829e-09	501	3005	130	0.0432612	0.259481	TF:M04069_1	TF	Factor: POU1F1; motif: AWTATGCWAATKAG; match class: 1	19728
query_1	TRUE	4.58417e-09	13128	3005	2147	0.714476	0.163544	TF:M03813	TF	Factor: BRN1; motif: HAATGCN	19728
query_1	TRUE	4.58824e-09	933	3005	213	0.0708819	0.228296	TF:M02909_1	TF	Factor: Sox-4; motif: NNNNNAATTGTTNNNNN; match class: 1	19728
query_1	TRUE	4.58824e-09	3661	3005	683	0.227288	0.186561	TF:M00294	TF	Factor: HFH8; motif: NNNTGTTTATNTR	19728
query_1	TRUE	4.84747e-09	4488	3005	818	0.272213	0.182264	TF:M11589	TF	Factor: FOXK1; motif: NNNGTAAACAN	19728
query_1	TRUE	5.00329e-09	4212	3005	773	0.257238	0.183523	TF:M00130	TF	Factor: FOXD3; motif: NAWTGTTTRTTT	19728
query_1	TRUE	5.33551e-09	3157	3005	599	0.199334	0.189737	TF:M00162	TF	Factor: Oct-1; motif: CWNAWTKWSATRYN	19728
query_1	TRUE	5.52598e-09	5554	3005	989	0.329118	0.17807	TF:M10147	TF	Factor: ZNF394; motif: NRARWRGAANNNAMWGNAAK	19728
query_1	TRUE	5.52598e-09	3951	3005	730	0.242928	0.184763	TF:M08405	TF	Factor: POU2F1:HOXB13; motif: NGMATATACCAATAAA	19728
query_1	TRUE	6.12409e-09	2635	3005	511	0.17005	0.193928	TF:M01211	TF	Factor: PARP; motif: YDRGAAAWAS	19728
query_1	TRUE	6.12409e-09	3298	3005	622	0.206988	0.188599	TF:M01385	TF	Factor: Pax-4; motif: WNNNYTAATTARYNSNN	19728
query_1	TRUE	6.22621e-09	729	3005	174	0.0579035	0.238683	TF:M03872_1	TF	Factor: HNF-1beta; motif: GTTAATYATTAACY; match class: 1	19728
query_1	TRUE	6.51536e-09	2365	3005	465	0.154742	0.196617	TF:M09976	TF	Factor: LHX2; motif: NNYTAATTRNNN	19728
query_1	TRUE	6.66044e-09	529	3005	135	0.0449251	0.255198	TF:M01464_1	TF	Factor: HOXA10; motif: NNNGYAATAAAATNNW; match class: 1	19728
query_1	TRUE	6.87063e-09	3186	3005	603	0.200666	0.189266	TF:M07076	TF	Factor: c-Jun:B-ATF; motif: RNWATGASTCA	19728
query_1	TRUE	6.92546e-09	12948	3005	2119	0.705158	0.163655	TF:M01808	TF	Factor: NMYC; motif: CAYCTG	19728
query_1	TRUE	7.1699e-09	1350	3005	288	0.0958403	0.213333	TF:M11000_1	TF	Factor: LIM-1; motif: NYAATTAN; match class: 1	19728
query_1	TRUE	7.30501e-09	4485	3005	816	0.271547	0.18194	TF:M02909	TF	Factor: Sox-4; motif: NNNNNAATTGTTNNNNN	19728
query_1	TRUE	7.50905e-09	2391	3005	469	0.156073	0.196152	TF:M11211_1	TF	Factor: AP-4; motif: ANCATATGNT; match class: 1	19728
query_1	TRUE	7.71461e-09	1753	3005	359	0.119468	0.204792	TF:M10892	TF	Factor: PMX2A; motif: SYAATTAN	19728
query_1	TRUE	7.71461e-09	1753	3005	359	0.119468	0.204792	TF:M10907	TF	Factor: SHOX; motif: NYAATTAN	19728
query_1	TRUE	7.71461e-09	1753	3005	359	0.119468	0.204792	TF:M10881	TF	Factor: Alx-4; motif: NYAATTAN	19728
query_1	TRUE	8.19464e-09	1481	3005	311	0.103494	0.209993	TF:M08203_1	TF	Factor: CDP:T-bet; motif: NTCACACNYYRATCRATM; match class: 1	19728
query_1	TRUE	8.43708e-09	2124	3005	423	0.140765	0.199153	TF:M04351	TF	Factor: HOXC10; motif: GYMATWAAAN	19728
query_1	TRUE	8.43708e-09	1783	3005	364	0.121131	0.20415	TF:M08001	TF	Factor: NFATC3; motif: WNTTTCCRNN	19728
query_1	TRUE	8.99487e-09	2577	3005	500	0.166389	0.194024	TF:M00744	TF	Factor: POU1F1; motif: ATGAATAAWT	19728
query_1	TRUE	9.09588e-09	1214	3005	263	0.0875208	0.216639	TF:M04300_1	TF	Factor: Dlx-2; motif: NYAATTAN; match class: 1	19728
query_1	TRUE	9.337e-09	2342	3005	460	0.153078	0.196413	TF:M10091	TF	Factor: TCF-1; motif: NNNMACATCAAAGNNN	19728
query_1	TRUE	9.38741e-09	634	3005	155	0.0515807	0.244479	TF:M11894_1	TF	Factor: Oct-2; motif: NNNATTATGCAW; match class: 1	19728
query_1	TRUE	9.62367e-09	12049	3005	1985	0.660566	0.164744	TF:M03858	TF	Factor: TCF-3; motif: CTTTGA	19728
query_1	TRUE	9.62367e-09	12049	3005	1985	0.660566	0.164744	TF:M00805	TF	Factor: TCF-7; motif: TCAAAG	19728
query_1	TRUE	1.06369e-08	4977	3005	894	0.297504	0.179626	TF:M02085	TF	Factor: Bcl-6; motif: NTTYCTAGRA	19728
query_1	TRUE	1.08501e-08	1183	3005	257	0.0855241	0.217244	TF:M00690	TF	Factor: AP-3; motif: TCYMMATT	19728
query_1	TRUE	1.13173e-08	1972	3005	396	0.13178	0.200811	TF:M00930	TF	Factor: Oct-1; motif: TNATTTGCATW	19728
query_1	TRUE	1.16571e-08	7522	3005	1296	0.431281	0.172295	TF:M09725	TF	Factor: DREF; motif: CTYYCWCTTCCY	19728
query_1	TRUE	1.32761e-08	3139	3005	593	0.197338	0.188914	TF:M01022	TF	Factor: LEF-1; motif: NWTCAAAGNN	19728
query_1	TRUE	1.52135e-08	946	3005	213	0.0708819	0.225159	TF:M11897_1	TF	Factor: Oct-2; motif: NNNATTATGCAN; match class: 1	19728
query_1	TRUE	1.52135e-08	2545	3005	493	0.16406	0.193713	TF:M10603_1	TF	Factor: Dlx-7; motif: NTCRTTAN; match class: 1	19728
query_1	TRUE	1.52135e-08	2545	3005	493	0.16406	0.193713	TF:M10612_1	TF	Factor: Dlx-5; motif: NTCRTTAN; match class: 1	19728
query_1	TRUE	1.52832e-08	3583	3005	666	0.221631	0.185878	TF:M09782	TF	Factor: POU5F1; motif: NNATGCAAANN	19728
query_1	TRUE	1.5336e-08	1066	3005	235	0.078203	0.22045	TF:M09596_1	TF	Factor: C/EBPalpha; motif: NRTTGTGCAAYNN; match class: 1	19728
query_1	TRUE	1.81277e-08	1806	3005	366	0.121797	0.202658	TF:M04288	TF	Factor: BARHL2; motif: NNTAATTGNN	19728
query_1	TRUE	1.84027e-08	2673	3005	514	0.171048	0.192293	TF:M10070	TF	Factor: Sox-9; motif: AANGGNNNCWTTGTTY	19728
query_1	TRUE	1.84027e-08	5496	3005	975	0.324459	0.177402	TF:M00770	TF	Factor: C/EBP; motif: NNNTKNNGNAAN	19728
query_1	TRUE	1.89155e-08	981	3005	219	0.0728785	0.223242	TF:M07450_1	TF	Factor: HOXA9; motif: DTGATTTATKGY; match class: 1	19728
query_1	TRUE	1.96299e-08	793	3005	184	0.0612313	0.23203	TF:M04078_1	TF	Factor: POU3F2; motif: NWTGCATAAWTTA; match class: 1	19728
query_1	TRUE	1.99514e-08	3105	3005	586	0.195008	0.188728	TF:M07476_1	TF	Factor: Lhx8; motif: TGATTG; match class: 1	19728
query_1	TRUE	2.08489e-08	1659	3005	340	0.113145	0.204943	TF:M07607	TF	Factor: NFATc3; motif: WGGAAAANN	19728
query_1	TRUE	2.16829e-08	810	3005	187	0.0622296	0.230864	TF:M11910_1	TF	Factor: POU3F2; motif: NTAATTTATGCRN; match class: 1	19728
query_1	TRUE	2.21361e-08	5576	3005	987	0.328453	0.177009	TF:M07268	TF	Factor: Sox-4; motif: BCWTTGT	19728
query_1	TRUE	2.4904e-08	5736	3005	1012	0.336772	0.17643	TF:M02079	TF	Factor: Isl2; motif: CTAATKR	19728
query_1	TRUE	2.55122e-08	3158	3005	594	0.197671	0.188094	TF:M10761	TF	Factor: MOX1; motif: NTCRTTAN	19728
query_1	TRUE	2.7596e-08	3250	3005	609	0.202662	0.187385	TF:M11633_1	TF	Factor: Sox-10; motif: AACAATGGNCCATTGTT; match class: 1	19728
query_1	TRUE	2.85694e-08	1698	3005	346	0.115141	0.203769	TF:M10772	TF	Factor: hoxd9; motif: GYMATAAAAN	19728
query_1	TRUE	2.88576e-08	5163	3005	920	0.306156	0.178191	TF:M01014	TF	Factor: SOX; motif: CTCTTTGTTANGA	19728
query_1	TRUE	3.02977e-08	2151	3005	424	0.141098	0.197118	TF:M07419_1	TF	Factor: FOXP3; motif: NNNVAAACANWD; match class: 1	19728
query_1	TRUE	3.10054e-08	15490	3005	2480	0.825291	0.160103	TF:M01230	TF	Factor: ZNF333; motif: ATAAT	19728
query_1	TRUE	3.17088e-08	2964	3005	561	0.186689	0.189271	TF:M00342	TF	Factor: Oct-1; motif: TATGCAAATN	19728
query_1	TRUE	3.18742e-08	3247	3005	608	0.202329	0.18725	TF:M04443	TF	Factor: UNCX; motif: NYAATTAN	19728
query_1	TRUE	3.35341e-08	3624	3005	670	0.222962	0.184879	TF:M00671	TF	Factor: TCF-4; motif: SCTTTGAW	19728
query_1	TRUE	3.3815e-08	1186	3005	255	0.0848586	0.215008	TF:M10704_1	TF	Factor: HoxA5; motif: RTCATTAN; match class: 1	19728
query_1	TRUE	3.58862e-08	1276	3005	271	0.090183	0.212382	TF:M00190_1	TF	Factor: C/EBP; motif: NNATTGCNNAANNN; match class: 1	19728
query_1	TRUE	3.67782e-08	6150	3005	1076	0.35807	0.174959	TF:M01808_1	TF	Factor: NMYC; motif: CAYCTG; match class: 1	19728
query_1	TRUE	3.70312e-08	472	3005	121	0.0402662	0.256356	TF:M11507_1	TF	Factor: CDP; motif: NTATTGATYR; match class: 1	19728
query_1	TRUE	3.70976e-08	956	3005	213	0.0708819	0.222803	TF:M03829	TF	Factor: HNF-6; motif: AATCAATA	19728
query_1	TRUE	3.80049e-08	4821	3005	864	0.287521	0.179216	TF:M01594	TF	Factor: TCF-3; motif: NCTTTGWTNTKYW	19728
query_1	TRUE	3.84099e-08	2675	3005	512	0.170383	0.191402	TF:M07104	TF	Factor: JunD; motif: NRTGASTCATN	19728
query_1	TRUE	3.872e-08	800	3005	184	0.0612313	0.23	TF:M10941_1	TF	Factor: VSX1; motif: CYAATTRN; match class: 1	19728
query_1	TRUE	3.98195e-08	3397	3005	632	0.210316	0.186047	TF:M12194	TF	Factor: GATA-3; motif: MGATAACGATCT	19728
query_1	TRUE	3.98195e-08	710	3005	167	0.055574	0.235211	TF:M07257_1	TF	Factor: HOXA10; motif: TTATNNYWN; match class: 1	19728
query_1	TRUE	4.08898e-08	1842	3005	370	0.123128	0.200869	TF:M01149	TF	Factor: DMRT4; motif: AATGTADCAAWTT	19728
query_1	TRUE	4.165e-08	544	3005	135	0.0449251	0.248162	TF:M11570_1	TF	Factor: HNF-3alpha; motif: CNYTAAGTAAACAAAN; match class: 1	19728
query_1	TRUE	4.55599e-08	1046	3005	229	0.0762063	0.218929	TF:M11330	TF	Factor: Hlf; motif: NGTTRYGYAANN	19728
query_1	TRUE	4.58416e-08	4627	3005	832	0.276872	0.179814	TF:M00293	TF	Factor: Freac-7; motif: WNNANATAAAYANNNN	19728
query_1	TRUE	4.61316e-08	2625	3005	503	0.167388	0.191619	TF:M12070	TF	Factor: CIZ; motif: TTTTNNNNNNNNNNNNNAAAAA	19728
query_1	TRUE	4.71736e-08	4541	3005	818	0.272213	0.180137	TF:M08773	TF	Factor: HOXA7; motif: NYMATTAN	19728
query_1	TRUE	4.7782e-08	5395	3005	955	0.317804	0.177016	TF:M00432	TF	Factor: TTF1; motif: ASTCAAGTRK	19728
query_1	TRUE	5.12103e-08	2794	3005	531	0.176705	0.19005	TF:M00790	TF	Factor: HNF-1; motif: WRGTTAATNATTAACNNN	19728
query_1	TRUE	5.15186e-08	1713	3005	347	0.115474	0.202569	TF:M10651	TF	Factor: HOX11L2; motif: YAATTGNNNNNNNNNCAATTN	19728
query_1	TRUE	5.44294e-08	5048	3005	899	0.299168	0.17809	TF:M08793_1	TF	Factor: MEL1; motif: GATGAG; match class: 1	19728
query_1	TRUE	5.46838e-08	2462	3005	475	0.15807	0.192933	TF:M04383_1	TF	Factor: LBX2; motif: CTNRANSTAATTA; match class: 1	19728
query_1	TRUE	5.5328e-08	3898	3005	713	0.237271	0.182914	TF:M08764	TF	Factor: HNF-3alpha; motif: WRWGTAAAYA	19728
query_1	TRUE	5.56901e-08	318	3005	89	0.0296173	0.279874	TF:M01872_1	TF	Factor: DBP; motif: TTWTGYAA; match class: 1	19728
query_1	TRUE	5.79856e-08	1016	3005	223	0.0742097	0.219488	TF:M10586	TF	Factor: Barx-2; motif: NWWAAYCATTAN	19728
query_1	TRUE	6.10645e-08	1127	3005	243	0.0808652	0.215617	TF:M03952_1	TF	Factor: CDP; motif: TRATCRATAN; match class: 1	19728
query_1	TRUE	6.18648e-08	2146	3005	421	0.1401	0.196179	TF:M09839	TF	Factor: ATF4; motif: ATTGCATCAT	19728
query_1	TRUE	6.27688e-08	4672	3005	838	0.278869	0.179366	TF:M08318_1	TF	Factor: GCMa:FOXO1A; motif: GTMAATAMGGGTRN; match class: 1	19728
query_1	TRUE	6.92862e-08	758	3005	175	0.0582363	0.230871	TF:M07376_1	TF	Factor: beta-catenin; motif: CTTTGWTN; match class: 1	19728
query_1	TRUE	7.04235e-08	844	3005	191	0.0635607	0.226303	TF:M01404_1	TF	Factor: HOXD13; motif: NNNYYAATAAAANNNN; match class: 1	19728
query_1	TRUE	7.08558e-08	5355	3005	947	0.315141	0.176844	TF:M11588	TF	Factor: FOXK1; motif: NWYGTAAAYAR	19728
query_1	TRUE	7.11337e-08	1546	3005	317	0.105491	0.205045	TF:M09930_1	TF	Factor: foxm1; motif: TGTTTRCTYWNN; match class: 1	19728
query_1	TRUE	7.36982e-08	3465	3005	641	0.213311	0.184993	TF:M04431	TF	Factor: PRRX1; motif: NYAATTAN	19728
query_1	TRUE	7.38717e-08	2652	3005	506	0.168386	0.190799	TF:M10657	TF	Factor: NKX6B; motif: NTMATTAW	19728
query_1	TRUE	7.44256e-08	632	3005	151	0.0502496	0.238924	TF:M01137_1	TF	Factor: FOXO3A; motif: TRTAAACAANWN; match class: 1	19728
query_1	TRUE	7.50384e-08	1382	3005	288	0.0958403	0.208394	TF:M04082_1	TF	Factor: POU3F3; motif: WTNAATAWKNAW; match class: 1	19728
query_1	TRUE	8.19533e-08	1571	3005	321	0.106822	0.204328	TF:M09953	TF	Factor: HOXB13; motif: TTTTATNGSN	19728
query_1	TRUE	8.54377e-08	3523	3005	650	0.216306	0.184502	TF:M10800	TF	Factor: HOXA10; motif: NGYMATAAANN	19728
query_1	TRUE	9.51153e-08	2089	3005	410	0.136439	0.196266	TF:M00135	TF	Factor: Oct-1; motif: NNNNWTATGCAAATNTNNN	19728
query_1	TRUE	9.51153e-08	6595	3005	1142	0.380033	0.173161	TF:M11626	TF	Factor: Sox-9; motif: NNNACAATRG	19728
query_1	TRUE	9.74686e-08	703	3005	164	0.0545757	0.233286	TF:M08482_1	TF	Factor: FOXO1A:HOXA10; motif: RWMAACANCRTWAA; match class: 1	19728
query_1	TRUE	9.75012e-08	8227	3005	1396	0.464559	0.169685	TF:M10612	TF	Factor: Dlx-5; motif: NTCRTTAN	19728
query_1	TRUE	9.75012e-08	8227	3005	1396	0.464559	0.169685	TF:M10603	TF	Factor: Dlx-7; motif: NTCRTTAN	19728
query_1	TRUE	9.79476e-08	7820	3005	1333	0.443594	0.17046	TF:M08772	TF	Factor: HOXA6; motif: NYMATTAN	19728
query_1	TRUE	1.03225e-07	2874	3005	542	0.180366	0.188587	TF:M04258	TF	Factor: FOXO3; motif: GTAAACATGTTTAC	19728
query_1	TRUE	1.07876e-07	4067	3005	738	0.245591	0.181461	TF:M11847_1	TF	Factor: GR; motif: RGWACATWATGTWCY; match class: 1	19728
query_1	TRUE	1.09974e-07	1168	3005	249	0.0828619	0.213185	TF:M04084	TF	Factor: POU3F4; motif: TGCATAAWTTA	19728
query_1	TRUE	1.11878e-07	2292	3005	444	0.147754	0.193717	TF:M03873	TF	Factor: HOXA10; motif: ANTTTATG	19728
query_1	TRUE	1.11878e-07	3590	3005	660	0.219634	0.183844	TF:M10802	TF	Factor: HOXA10; motif: NGYMATAAANN	19728
query_1	TRUE	1.16213e-07	1264	3005	266	0.0885191	0.210443	TF:M01412_1	TF	Factor: Msx-1; motif: NNNNANTAATTANTNN; match class: 1	19728
query_1	TRUE	1.21347e-07	1577	3005	321	0.106822	0.203551	TF:M07385	TF	Factor: Lhx2; motif: NYTAATTASNK	19728
query_1	TRUE	1.21491e-07	543	3005	133	0.0442596	0.244936	TF:M04079_1	TF	Factor: POU3F2; motif: WTATGCWAATKA; match class: 1	19728
query_1	TRUE	1.2819e-07	4609	3005	825	0.274542	0.178998	TF:M04514	TF	Factor: CPEB1; motif: AATAAAAA	19728
query_1	TRUE	1.34475e-07	4214	3005	761	0.253245	0.180589	TF:M11905	TF	Factor: POU3F2; motif: NTAATTTATGCGY	19728
query_1	TRUE	1.38963e-07	539	3005	132	0.0439268	0.244898	TF:M00294_1	TF	Factor: HFH8; motif: NNNTGTTTATNTR; match class: 1	19728
query_1	TRUE	1.47759e-07	649	3005	153	0.0509151	0.235747	TF:M09988	TF	Factor: meis1; motif: NTGATTKATKNN	19728
query_1	TRUE	1.50277e-07	1655	3005	334	0.111148	0.201813	TF:M08473	TF	Factor: FOXJ2:HOXB13; motif: TTTTATNDGNMAACA	19728
query_1	TRUE	1.56648e-07	7306	3005	1251	0.416306	0.171229	TF:M10541	TF	Factor: SUHW1; motif: TCTCTCCAGTRTGAATTCTCTGAT	19728
query_1	TRUE	1.59296e-07	1876	3005	372	0.123794	0.198294	TF:M04320_1	TF	Factor: EVX1; motif: NNTNATTANN; match class: 1	19728
query_1	TRUE	1.6046e-07	1173	3005	249	0.0828619	0.212276	TF:M07416	TF	Factor: Cdx-2; motif: NNNNNWTTTATNNN	19728
query_1	TRUE	1.61544e-07	3203	3005	595	0.198003	0.185763	TF:M09624	TF	Factor: GATA-6; motif: NNNAGATAAGAWAN	19728
query_1	TRUE	1.72318e-07	335	3005	91	0.0302829	0.271642	TF:M00980_1	TF	Factor: TBP; motif: TTTATAN; match class: 1	19728
query_1	TRUE	1.75848e-07	725	3005	167	0.055574	0.230345	TF:M01479_1	TF	Factor: POU6F1; motif: NNNNWTAATGAGSTNNN; match class: 1	19728
query_1	TRUE	1.78529e-07	2431	3005	466	0.155075	0.191691	TF:M10062	TF	Factor: SNF2L; motif: NMARGAAGMATN	19728
query_1	TRUE	1.80545e-07	2586	3005	492	0.163727	0.190255	TF:M12070_1	TF	Factor: CIZ; motif: TTTTNNNNNNNNNNNNNAAAAA; match class: 1	19728
query_1	TRUE	1.85962e-07	4519	3005	809	0.269218	0.179022	TF:M11985_1	TF	Factor: NFATc2; motif: TTTTCCATGGAAAA; match class: 1	19728
query_1	TRUE	1.87746e-07	1097	3005	235	0.078203	0.214221	TF:M12192_1	TF	Factor: GATA-3; motif: AGATAACGATCW; match class: 1	19728
query_1	TRUE	1.90372e-07	1607	3005	325	0.108153	0.20224	TF:M10744	TF	Factor: ipf1; motif: YTAATKRC	19728
query_1	TRUE	1.9381e-07	14420	3005	2320	0.772047	0.160888	TF:M02086	TF	Factor: Cdx-1; motif: TTTATK	19728
query_1	TRUE	1.96125e-07	673	3005	157	0.0522463	0.233284	TF:M00349_1	TF	Factor: GATA-2; motif: ASAGATAANA; match class: 1	19728
query_1	TRUE	1.96125e-07	823	3005	185	0.0615641	0.224787	TF:M01594_1	TF	Factor: TCF-3; motif: NCTTTGWTNTKYW; match class: 1	19728
query_1	TRUE	2.0028e-07	2469	3005	472	0.157072	0.191171	TF:M10681	TF	Factor: HPX42B; motif: NNYNATTANN	19728
query_1	TRUE	2.01524e-07	668	3005	156	0.0519135	0.233533	TF:M08838_1	TF	Factor: Sox-9; motif: MACARWGNNNYCNTTNW; match class: 1	19728
query_1	TRUE	2.01524e-07	1608	3005	325	0.108153	0.202114	TF:M03951_1	TF	Factor: CDP; motif: ATCGATNNNNNNATCRAT; match class: 1	19728
query_1	TRUE	2.01764e-07	6102	3005	1061	0.353078	0.173877	TF:M01653	TF	Factor: HMGIY; motif: NGWWATTN	19728
query_1	TRUE	2.19994e-07	1466	3005	300	0.0998336	0.204638	TF:M01431_1	TF	Factor: Barx-2; motif: TAANTAATTANTKNTN; match class: 1	19728
query_1	TRUE	2.20667e-07	1981	3005	389	0.129451	0.196365	TF:M04340	TF	Factor: HOXA10; motif: NGYMATAAAAN	19728
query_1	TRUE	2.23812e-07	1650	3005	332	0.110483	0.201212	TF:M11928	TF	Factor: POU3F1; motif: NTATGCWAATNNN	19728
query_1	TRUE	2.32227e-07	14218	3005	2290	0.762063	0.161063	TF:M02116	TF	Factor: Sox-10; motif: NACAAWG	19728
query_1	TRUE	2.351e-07	2496	3005	476	0.158403	0.190705	TF:M01385_1	TF	Factor: Pax-4; motif: WNNNYTAATTARYNSNN; match class: 1	19728
query_1	TRUE	2.37757e-07	1513	3005	308	0.102496	0.203569	TF:M00465	TF	Factor: POU6F1; motif: GCATAAWTTAT	19728
query_1	TRUE	2.3802e-07	3583	3005	656	0.218303	0.183087	TF:M09745	TF	Factor: HELIOS; motif: RNARRRGGAASTGARAN	19728
query_1	TRUE	2.53932e-07	1733	3005	346	0.115141	0.199654	TF:M11903	TF	Factor: POU2F3; motif: NNAYGCTNATS	19728
query_1	TRUE	2.56265e-07	6388	3005	1105	0.36772	0.172981	TF:M11334	TF	Factor: ATF-4; motif: GGATGATGTCATCC	19728
query_1	TRUE	2.69433e-07	1492	3005	304	0.101165	0.203753	TF:M01325	TF	Factor: LHX2; motif: WNNACTAATTAGNNNNN	19728
query_1	TRUE	2.82229e-07	243	3005	71	0.0236273	0.292181	TF:M01211_1	TF	Factor: PARP; motif: YDRGAAAWAS; match class: 1	19728
query_1	TRUE	3.00904e-07	1334	3005	276	0.0918469	0.206897	TF:M00407	TF	Factor: RSRFC4; motif: ANKCTAWAAATAGMHYN	19728
query_1	TRUE	3.07037e-07	2951	3005	551	0.183361	0.186716	TF:M08491	TF	Factor: HOXB13:TBR2; motif: ANGTGTNNMATAAAN	19728
query_1	TRUE	3.07772e-07	4000	3005	723	0.240599	0.18075	TF:M03951	TF	Factor: CDP; motif: ATCGATNNNNNNATCRAT	19728
query_1	TRUE	3.17491e-07	1015	3005	219	0.0728785	0.215764	TF:M04430	TF	Factor: Prop-1; motif: TAATYNAATTA	19728
query_1	TRUE	3.23554e-07	1512	3005	307	0.102163	0.203042	TF:M10891	TF	Factor: PMX2A; motif: NYAATTAN	19728
query_1	TRUE	3.40347e-07	3469	3005	636	0.211647	0.183338	TF:M11906	TF	Factor: POU3F2; motif: NTAATGAKATGCGN	19728
query_1	TRUE	3.47392e-07	1393	3005	286	0.0951747	0.205312	TF:M04348	TF	Factor: HOXB3; motif: NNYMATTANN	19728
query_1	TRUE	3.53831e-07	2510	3005	477	0.158735	0.19004	TF:M08816	TF	Factor: HOXD10; motif: TTTTATTM	19728
query_1	TRUE	3.67978e-07	1838	3005	363	0.120799	0.197497	TF:M11268_1	TF	Factor: JunD; motif: NATGASTCATS; match class: 1	19728
query_1	TRUE	3.73346e-07	653	3005	152	0.0505824	0.232772	TF:M04068_1	TF	Factor: POU1F1; motif: NNNATGMATAWTTAATN; match class: 1	19728
query_1	TRUE	3.88128e-07	1062	3005	227	0.0755408	0.213748	TF:M10011	TF	Factor: NKX6A; motif: GANWAATKRSNWWTTAATK	19728
query_1	TRUE	3.92593e-07	4414	3005	789	0.262562	0.178749	TF:M10615	TF	Factor: Dlx-5; motif: NTCRTTAN	19728
query_1	TRUE	3.94399e-07	2103	3005	408	0.135774	0.194009	TF:M01356_1	TF	Factor: PMX2B; motif: NNNAATTAATTAANNNG; match class: 1	19728
query_1	TRUE	4.03538e-07	2127	3005	412	0.137105	0.1937	TF:M09869	TF	Factor: ATF-4; motif: RNMTGATGCAAY	19728
query_1	TRUE	4.06459e-07	4938	3005	873	0.290516	0.176792	TF:M04334	TF	Factor: HMX2; motif: ANCAMTTAANN	19728
query_1	TRUE	4.14637e-07	596	3005	141	0.0469218	0.236577	TF:M07428_1	TF	Factor: Six-3; motif: NWBTAATNYYWN; match class: 1	19728
query_1	TRUE	4.1652e-07	549	3005	132	0.0439268	0.240437	TF:M04442_1	TF	Factor: UNCX; motif: NTAATNNAATTAN; match class: 1	19728
query_1	TRUE	4.1652e-07	772	3005	174	0.0579035	0.225389	TF:M07038_1	TF	Factor: DBP; motif: TTRCATAANN; match class: 1	19728
query_1	TRUE	4.22211e-07	518	3005	126	0.0419301	0.243243	TF:M11566_1	TF	Factor: HNF-3alpha; motif: NWRWGTMAAYAW; match class: 1	19728
query_1	TRUE	4.24045e-07	1080	3005	230	0.0765391	0.212963	TF:M10926	TF	Factor: Prop-1; motif: TAATTNNRTTA	19728
query_1	TRUE	4.44489e-07	735	3005	167	0.055574	0.227211	TF:M10873_1	TF	Factor: alx3; motif: NYAATTAN; match class: 1	19728
query_1	TRUE	4.46632e-07	4244	3005	761	0.253245	0.179312	TF:M08838	TF	Factor: Sox-9; motif: MACARWGNNNYCNTTNW	19728
query_1	TRUE	4.47488e-07	1569	3005	316	0.105158	0.201402	TF:M01235_1	TF	Factor: ipf1; motif: NVSTAATTAC; match class: 1	19728
query_1	TRUE	4.47721e-07	1176	3005	247	0.0821963	0.210034	TF:M04298	TF	Factor: Cdx-2; motif: GYMATAAAA	19728
query_1	TRUE	4.62757e-07	3924	3005	709	0.23594	0.180683	TF:M11555	TF	Factor: HFH2; motif: NNWAYRTAAACW	19728
query_1	TRUE	4.62757e-07	5211	3005	916	0.304825	0.175782	TF:M10816	TF	Factor: HOXC11; motif: NGYMATWAANN	19728
query_1	TRUE	4.73882e-07	1478	3005	300	0.0998336	0.202977	TF:M04321_1	TF	Factor: EVX2; motif: NNTNATTANN; match class: 1	19728
query_1	TRUE	4.73882e-07	5589	3005	976	0.324792	0.174629	TF:M00190	TF	Factor: C/EBP; motif: NNATTGCNNAANNN	19728
query_1	TRUE	5.07039e-07	715	3005	163	0.0542429	0.227972	TF:M04281	TF	Factor: ALX4; motif: NTAATYNAATTAN	19728
query_1	TRUE	5.07039e-07	1502	3005	304	0.101165	0.202397	TF:M08394	TF	Factor: PBX4:HOXA1; motif: NYNATMAATCA	19728
query_1	TRUE	5.25332e-07	2788	3005	522	0.17371	0.187231	TF:M01234	TF	Factor: ipf1; motif: AVCTAATGAG	19728
query_1	TRUE	5.35098e-07	3645	3005	663	0.220632	0.181893	TF:M09849	TF	Factor: TIF2; motif: ANANAGAWAAGN	19728
query_1	TRUE	5.57806e-07	1613	3005	323	0.107488	0.200248	TF:M11626_1	TF	Factor: Sox-9; motif: NNNACAATRG; match class: 1	19728
query_1	TRUE	5.58187e-07	3237	3005	596	0.198336	0.184121	TF:M10965	TF	Factor: ESX1L; motif: NYAATTAN	19728
query_1	TRUE	5.65653e-07	2240	3005	430	0.143095	0.191964	TF:M10822	TF	Factor: HOXA11; motif: NGYMATAAAAN	19728
query_1	TRUE	5.99903e-07	6165	3005	1066	0.354742	0.172912	TF:M04625	TF	Factor: PLZF; motif: ACTKTANNTN	19728
query_1	TRUE	6.2147e-07	3209	3005	591	0.196672	0.18417	TF:M10569	TF	Factor: HB9; motif: NTCRTTAN	19728
query_1	TRUE	6.3705e-07	2546	3005	481	0.160067	0.188924	TF:M01694	TF	Factor: YY2; motif: CCATTWN	19728
query_1	TRUE	6.56478e-07	788	3005	176	0.0585691	0.22335	TF:M10806	TF	Factor: HOXC10; motif: NGYMATAAAAN	19728
query_1	TRUE	7.12308e-07	4163	3005	746	0.248253	0.179198	TF:M09933	TF	Factor: FOXP1; motif: TNTGTTTMY	19728
query_1	TRUE	7.31376e-07	14327	3005	2301	0.765724	0.160606	TF:M03849	TF	Factor: Sox-4; motif: AACAAA	19728
query_1	TRUE	7.41985e-07	2585	3005	487	0.162063	0.188395	TF:M10535_1	TF	Factor: znf136; motif: CAAGAATWCTATAYCCAG; match class: 1	19728
query_1	TRUE	7.4513e-07	4967	3005	875	0.291181	0.176163	TF:M00912	TF	Factor: C/EBP; motif: NTTRCNNAANNN	19728
query_1	TRUE	7.5308e-07	13847	3005	2231	0.742429	0.161118	TF:M05405	TF	Factor: Zbtb44; motif: CKGTGA	19728
query_1	TRUE	7.57757e-07	2139	3005	412	0.137105	0.192613	TF:M11513	TF	Factor: DMRT5; motif: NNNNGWTACANT	19728
query_1	TRUE	7.67406e-07	2772	3005	518	0.172379	0.186869	TF:M10718	TF	Factor: HOXC4; motif: RTCRTTAN	19728
query_1	TRUE	7.77043e-07	752	3005	169	0.0562396	0.224734	TF:M08494	TF	Factor: HOXB13:OC-2; motif: NNNRTAAAWATYGATY	19728
query_1	TRUE	7.79366e-07	3269	3005	600	0.199667	0.183542	TF:M09879	TF	Factor: Cdx-2; motif: TTTNATTGCNNT	19728
query_1	TRUE	7.97781e-07	1055	3005	224	0.0745424	0.212322	TF:M10816_1	TF	Factor: HOXC11; motif: NGYMATWAANN; match class: 1	19728
query_1	TRUE	8.28788e-07	656	3005	151	0.0502496	0.230183	TF:M04609_1	TF	Factor: AP-3; motif: TKGAAAKN; match class: 1	19728
query_1	TRUE	8.34267e-07	3155	3005	581	0.193344	0.184152	TF:M04433	TF	Factor: PRRX2; motif: NYAATTAN	19728
query_1	TRUE	8.50277e-07	1742	3005	344	0.114476	0.197474	TF:M07255_1	TF	Factor: Foxm1; motif: NTGTTTRT; match class: 1	19728
query_1	TRUE	9.04046e-07	4380	3005	780	0.259567	0.178082	TF:M11554	TF	Factor: HFH2; motif: NYWAYRTAAACA	19728
query_1	TRUE	9.42113e-07	1147	3005	240	0.0798669	0.209241	TF:M04238	TF	Factor: FOXD2; motif: NRNWAATATTTAYN	19728
query_1	TRUE	9.63034e-07	2280	3005	435	0.144759	0.190789	TF:M11550	TF	Factor: FOXD2; motif: GYTRNGTMAACAN	19728
query_1	TRUE	1.04052e-06	2228	3005	426	0.141764	0.191203	TF:M09669	TF	Factor: TCF-4; motif: NNNCTTTGAWSTN	19728
query_1	TRUE	1.06088e-06	2401	3005	455	0.151414	0.189504	TF:M10693	TF	Factor: HOXB6; motif: NTAATKRC	19728
query_1	TRUE	1.12866e-06	1223	3005	253	0.084193	0.206868	TF:M10696_1	TF	Factor: HOXA6; motif: NGYMATTANN; match class: 1	19728
query_1	TRUE	1.12866e-06	1082	3005	228	0.0758735	0.210721	TF:M04312_1	TF	Factor: EMX1; motif: NNTAATTANN; match class: 1	19728
query_1	TRUE	1.13969e-06	2564	3005	482	0.160399	0.187988	TF:M00228	TF	Factor: VBP; motif: GTTACRTMAT	19728
query_1	TRUE	1.14666e-06	1911	3005	372	0.123794	0.194662	TF:M04081	TF	Factor: POU3F3; motif: WTGMATAAWTWA	19728
query_1	TRUE	1.15113e-06	3278	3005	600	0.199667	0.183038	TF:M01414_1	TF	Factor: NKX25; motif: NNANCCACTTRAAWTT; match class: 1	19728
query_1	TRUE	1.17869e-06	4207	3005	751	0.249917	0.178512	TF:M08482	TF	Factor: FOXO1A:HOXA10; motif: RWMAACANCRTWAA	19728
query_1	TRUE	1.19383e-06	746	3005	167	0.055574	0.223861	TF:M07076_1	TF	Factor: c-Jun:B-ATF; motif: RNWATGASTCA; match class: 1	19728
query_1	TRUE	1.24155e-06	2686	3005	502	0.167055	0.186895	TF:M11046	TF	Factor: CLOCK; motif: NNCAYGYGYN	19728
query_1	TRUE	1.25232e-06	2849	3005	529	0.17604	0.185679	TF:M10724	TF	Factor: HOXD8; motif: GYMATTAN	19728
query_1	TRUE	1.28081e-06	1157	3005	241	0.0801997	0.208297	TF:M11579_1	TF	Factor: foxl2; motif: NNYGTAAACAN; match class: 1	19728
query_1	TRUE	1.30864e-06	581	3005	136	0.0452579	0.234079	TF:M01307_1	TF	Factor: Oct3; motif: NATGCAANNN; match class: 1	19728
query_1	TRUE	1.31579e-06	2832	3005	526	0.175042	0.185734	TF:M03826	TF	Factor: HNF-1beta; motif: NNNYAAHCATTAACYN	19728
query_1	TRUE	1.34616e-06	2742	3005	511	0.17005	0.18636	TF:M00476	TF	Factor: FOXO4; motif: NNGTTGTTTACNTN	19728
query_1	TRUE	1.40726e-06	1164	3005	242	0.0805324	0.207904	TF:M02079_1	TF	Factor: Isl2; motif: CTAATKR; match class: 1	19728
query_1	TRUE	1.42045e-06	11042	3005	1812	0.602995	0.164101	TF:M08794	TF	Factor: MEL1; motif: GARGAT	19728
query_1	TRUE	1.44626e-06	874	3005	190	0.063228	0.217391	TF:M08801	TF	Factor: C/EBPepsilon; motif: MTTDCNNMAB	19728
query_1	TRUE	1.49993e-06	673	3005	153	0.0509151	0.22734	TF:M04431_1	TF	Factor: PRRX1; motif: NYAATTAN; match class: 1	19728
query_1	TRUE	1.50229e-06	2277	3005	433	0.144093	0.190162	TF:M11568	TF	Factor: HNF-3alpha; motif: NNYTAWGTAAACAAAN	19728
query_1	TRUE	1.51192e-06	1537	3005	307	0.102163	0.19974	TF:M10818	TF	Factor: HOXC11; motif: NGYMATAAAAN	19728
query_1	TRUE	1.5175e-06	2111	3005	405	0.134775	0.191852	TF:M10600_1	TF	Factor: Dlx-7; motif: NTCRTTAN; match class: 1	19728
query_1	TRUE	1.52209e-06	1987	3005	384	0.127787	0.193256	TF:M00006	TF	Factor: MEF-2A; motif: CTCTAAAAATAACYCY	19728
query_1	TRUE	1.54282e-06	1852	3005	361	0.120133	0.194924	TF:M07136	TF	Factor: TCF-4; motif: NNASATCAAAGNNN	19728
query_1	TRUE	1.55394e-06	442	3005	109	0.0362729	0.246606	TF:M11911_1	TF	Factor: POU3F2; motif: NTAATGAKATGCAN; match class: 1	19728
query_1	TRUE	1.65473e-06	1280	3005	262	0.087188	0.204687	TF:M11908_1	TF	Factor: POU3F2; motif: TAATKAGNNNNTAATKA; match class: 1	19728
query_1	TRUE	1.7068e-06	1071	3005	225	0.0748752	0.210084	TF:M09612	TF	Factor: EVX2; motif: TTTTATKRCNNN	19728
query_1	TRUE	1.78939e-06	1621	3005	321	0.106822	0.198026	TF:M07988_1	TF	Factor: EMX1; motif: NNTAATKANN; match class: 1	19728
query_1	TRUE	1.82392e-06	2162	3005	413	0.137438	0.191027	TF:M00350	TF	Factor: GATA-3; motif: NGAGATAANA	19728
query_1	TRUE	1.85662e-06	977	3005	208	0.069218	0.212897	TF:M00293_1	TF	Factor: Freac-7; motif: WNNANATAAAYANNNN; match class: 1	19728
query_1	TRUE	1.90355e-06	1460	3005	293	0.0975042	0.200685	TF:M11892	TF	Factor: Oct-2; motif: WTATGCAAATK	19728
query_1	TRUE	1.90355e-06	806	3005	177	0.0589018	0.219603	TF:M00302	TF	Factor: NFAT; motif: NANWGGAAAANN	19728
query_1	TRUE	1.90355e-06	2804	3005	520	0.173045	0.185449	TF:M11209_1	TF	Factor: AP-4; motif: ANCATATGNT; match class: 1	19728
query_1	TRUE	1.98243e-06	741	3005	165	0.0549085	0.222672	TF:M08202_1	TF	Factor: CDP:HOXB13; motif: SYMRTAAANATYGATY; match class: 1	19728
query_1	TRUE	2.01986e-06	612	3005	141	0.0469218	0.230392	TF:M04281_1	TF	Factor: ALX4; motif: NTAATYNAATTAN; match class: 1	19728
query_1	TRUE	2.09192e-06	3888	3005	697	0.231947	0.17927	TF:M11383	TF	Factor: ESE-1; motif: ACCAGGAAGTANNNNNNNAAWAA	19728
[truncated: 1,294 more rows]

## Sheet: Module1_DownInTumor_OPOSSUM
TF	JASPAR ID	Class	Family	Tax Group	IC	GC Content	Target gene hits	Target gene non-hits	Background gene hits	Background gene non-hits	Target TFBS hits	Target TFBS nucleotide rate	Background TFBS hits	Background TFBS nucleotide rate	Z-score	Fisher score
Pdx1	MA0132.1	Helix-Turn-Helix	Homeo	vertebrates	9.04	0.194	2304	1217	15507	9245	31342	0.0289	140973	0.0235	90.178	7.274
SRY	MA0084.1	Other Alpha-Helix	High Mobility Group	vertebrates	9.193	0.238	2231	1290	14714	10038	22480	0.031	101929	0.0255	89.95	12.304
Foxd3	MA0041.1	Winged Helix-Turn-Helix	Forkhead	vertebrates	12.945	0.223	1790	1731	11354	13398	11141	0.0205	49535	0.0165	80.051	17.804
FOXI1	MA0042.1	Winged Helix-Turn-Helix	Forkhead	vertebrates	13.183	0.263	1830	1691	11680	13072	11057	0.0204	49366	0.0165	78.213	16.657
Prrx2	MA0075.1	Helix-Turn-Helix	Homeo	vertebrates	9.063	0.027	2284	1237	15063	9689	27382	0.021	123270	0.0171	76.364	12.967
FOXA1	MA0148.1	Winged Helix-Turn-Helix	Forkhead	vertebrates	12.533	0.332	2048	1473	13355	11397	13813	0.0233	63112	0.0193	74.679	13.484
Sox5	MA0087.1	Other Alpha-Helix	High Mobility Group	vertebrates	10.831	0.199	2015	1506	13087	11665	16148	0.0173	72042	0.014	72.354	14.241
Foxa2	MA0047.2	Winged Helix-Turn-Helix	Forkhead	vertebrates	13.268	0.315	1841	1680	11656	13096	9640	0.0177	43535	0.0145	69.015	19.248
Gfi	MA0038.1	Zinc-coordinating	BetaBetaAlpha-zinc finger	vertebrates	9.47	0.391	2058	1463	13731	11021	14076	0.0216	65844	0.0183	62.901	7.685
FOXO3	MA0157.1	Winged Helix-Turn-Helix	Forkhead	vertebrates	11.734	0.298	2081	1440	13611	11141	15024	0.0184	69410	0.0154	62.4	13.013
TBP	MA0108.2	Beta-sheet	TATA-binding	vertebrates	10.086	0.377	1675	1846	10389	14363	7358	0.0169	33775	0.0141	61.922	22.283
CEBPA	MA0102.2	Zipper-Type	Leucine Zipper	vertebrates	8.712	0.358	1973	1548	12828	11924	12031	0.0166	55606	0.0139	59.041	13.392
FOXD1	MA0031.1	Winged Helix-Turn-Helix	Forkhead	vertebrates	11.926	0.275	2019	1502	13087	11665	13588	0.0167	62921	0.014	58.529	14.888
NKX3-1	MA0124.1	Helix-Turn-Helix	Homeo	vertebrates	11.127	0.179	1925	1596	12654	12098	14735	0.0158	68823	0.0134	54.199	10.057
Foxq1	MA0040.1	Winged Helix-Turn-Helix	Forkhead	vertebrates	14.07	0.202	1311	2210	8007	16745	4867	0.00821	22088	0.00675	45.619	18.949
SOX9	MA0077.1	Other Alpha-Helix	High Mobility Group	vertebrates	9.079	0.358	1767	1754	11417	13335	8788	0.0121	41403	0.0104	44.932	12.57
NFIL3	MA0025.1	Zipper-Type	Leucine Zipper	vertebrates	14.139	0.265	1166	2355	6731	18021	3541	0.00598	15828	0.00484	41.893	28.857
Lhx3	MA0135.1	Helix-Turn-Helix	Homeo	vertebrates	16.354	0.131	1026	2495	5806	18946	2808	0.0056	12758	0.00461	37.411	28.975
MEF2A	MA0052.1	Other Alpha-Helix	MADS	vertebrates	15.709	0.179	1228	2293	7006	17746	3436	0.00527	15631	0.00434	36.055	34.163
Tal1::Gata1	MA0140.1	Zipper-Type	Helix-Loop-Helix	vertebrates	11.297	0.451	1071	2450	6212	18540	2385	0.00659	11200	0.0056	33.701	24.836
HNF1A	MA0046.1	Helix-Turn-Helix	Homeo	vertebrates	15.548	0.259	623	2898	3044	21708	1024	0.0022	4352	0.00169	31.461	39.692
Pou5f1	MA0142.1	Helix-Turn-Helix	Homeo	vertebrates	14.808	0.308	648	2873	3402	21350	1182	0.00272	5205	0.00217	30.23	28.416
HNF1B	MA0153.1	Helix-Turn-Helix	Homeo	vertebrates	16.821	0.222	804	2717	4107	20645	1558	0.00287	6910	0.0023	30.06	42.237
TAL1::TCF3	MA0091.1	Zipper-Type	Helix-Loop-Helix	vertebrates	14.07	0.453	1255	2266	7491	17261	3091	0.00569	14681	0.0049	29.117	23.104
FOXF2	MA0030.1	Winged Helix-Turn-Helix	Forkhead	vertebrates	14.824	0.334	775	2746	4097	20655	1416	0.00304	6459	0.00251	26.979	33.277
HLF	MA0043.1	Zipper-Type	Leucine Zipper	vertebrates	11.147	0.394	956	2565	5508	19244	2128	0.00392	9969	0.00332	26.349	22.933
IRF1	MA0050.1	Winged Helix-Turn-Helix	IRF	vertebrates	16.008	0.383	1029	2492	6075	18677	2432	0.00448	11517	0.00384	26.319	20.06
Sox2	MA0143.1	Other Alpha-Helix	High Mobility Group	vertebrates	12.951	0.361	563	2958	2809	21943	863	0.00199	3844	0.0016	24.511	32.148
Ddit3::Cebpa	MA0019.1	Zipper-Type	Leucine Zipper	vertebrates	11.652	0.483	975	2546	5576	19176	2057	0.00379	9754	0.00325	23.99	24.992
Evi1	MA0029.1	Zinc-coordinating	BetaBetaAlpha-zinc finger	vertebrates	17.909	0.28	401	3120	1931	22821	569	0.00122	2457	0.000956	22.009	26.737
STAT1	MA0137.2	Ig-fold	Stat	vertebrates	13.119	0.452	1103	2418	6394	18358	2243	0.00516	10990	0.00458	21.994	25.9
NR3C1	MA0113.1	Zinc-coordinating	Hormone-nuclear Receptor	vertebrates	14.749	0.432	499	3022	2522	22230	696	0.00192	3161	0.00158	21.924	26.533
PBX1	MA0070.1	Helix-Turn-Helix	Homeo	vertebrates	14.641	0.31	731	2790	4107	20645	1412	0.0026	6634	0.00221	21.07	20.682
IRF2	MA0051.1	Winged Helix-Turn-Helix	IRF	vertebrates	21.134	0.412	194	3327	844	23908	220	0.000608	923	0.000462	17.339	19.613
Hand1::Tcfe2a	MA0092.1	Zipper-Type	Helix-Loop-Helix	vertebrates	10.144	0.507	1999	1522	13286	11466	10453	0.016	54768	0.0152	17.114	8.132
Nr2e3	MA0164.1	Zinc-coordinating	Hormone-nuclear Receptor	vertebrates	12.028	0.373	1037	2484	6354	18398	2520	0.00271	12287	0.00239	16.557	13.591
RORA_2	MA0072.1	Zinc-coordinating	Hormone-nuclear Receptor	vertebrates	17.425	0.369	644	2877	3571	21181	1048	0.00225	5079	0.00198	15.832	19.862
TEAD1	MA0090.1	Helix-Turn-Helix	Homeo	vertebrates	15.678	0.507	883	2638	5222	19530	1687	0.00311	8446	0.00282	13.966	16.502
SRF	MA0083.1	Other Alpha-Helix	MADS	vertebrates	17.965	0.466	209	3312	908	23844	238	0.000438	1019	0.00034	13.626	21.132
REST	MA0138.2	Zinc-coordinating	BetaBetaAlpha-zinc finger	vertebrates	23.134	0.596	57	3464	232	24520	59	0.00019	242	0.000141	10.489	8.192

## Sheet: Module2_UpInTumor_Genes
geneSymbol
GDF6
DRP2
LILRA5
AVPI1
GZMH
DNAJC5B
KCNAB2
TRGV8
GNGT2
EFCAB8
SMARCE1P2
SLC25A35
TPT1-AS1
AC079949.1
ISLR2
HMGN2P46
IGFL2
C8orf48
RP5-857K21.7
MTND5P11
MT-ND6
MT-ND5
MT-TE
MT-ND3
MTND4P12
MTND2P28
MT-ND2
MT-ATP8
MT-ND4
MT-ATP6
MT-CYB
MT-ND4L
MTATP6P1
MT-CO3
MT-CO2
MT-ND1
MT-CO1
hsa-mir-6723
RP5-857K21.11
MTND6P4
MT-TY
MTND1P23
MT-TL1
ERCC6-PGBD3
CD70
C19orf59
RP11-103H7.5
CD244
CCL18
ZNF22
MPP4
AMDHD1
KCNN2
HHIPL2
GPR171
RGS19
PDE6G
UNC93B7
PAM16
ATP1A3
CD33
CACNA2D4
MYOZ1
TMEM86A
SLC38A5
RP11-468E2.9
C14orf182
RP11-293G6__A.2
AC110781.3
RP11-793H13.8
GRIN2D
CLDN14
TEX29
HAPLN1
SRRM3
KCNE2
RP11-34P13.14
HAVCR1
SLC35G1
BEST1
SPRED3
RUNDC3A
AC126365.1
MLLT11
AC137932.6
RAB42
PLA1A
RAB39A
GOLGA5P1
C1orf200
LY86
ACTL10
GABRB2
CFL1P3
PTK7
FLJ00104
TTL
FIBCD1
U82695.9
ANKLE2
C1RL-AS1
RP11-215G15.4
CR1L
TRIM73
RP11-365F18.3
RP11-62H7.3
ALG1L
AVPR2
RP11-206L10.8
AC098831.4
RP11-1105G2.3
TMEM189-UBE2V1
KLF17
PSG5
PSG4
TM4SF4
VSIG10L
ACOT4
PXMP4
GPR110
PLEKHD1
COLEC10
RP11-288E14.2
NDUFA5P11
RP11-774O3.3
RBM43
ULK4P3
ULK4P2
LARP6
RP11-277I20.3
PRG4
ICA1L
CUBN
RP11-777F6.3
OSCP1
EAPP
TCEAL5
CAB39L
TTLL7
DENND2C
CNKSR2
CSRP2
TRDMT1
PCDH9
DTNA
KCNAB1
CREB5
ATL1
ADPRM
AK9
COL4A3
RP11-876N24.1
TDRD6
PLCE1
LRP2BP
CAPN3
RP11-356J5.5
DRAM1
APOBR
COA6
CENPH
PLEKHA8
APITD1
PCK2
MFSD9
PRKAR1AP
CCDC126
CCDC121
AK1
PPIAL4G
PPIAL4D
PPIAL4F
PPIAL4E
RP11-613M10.9
RP11-196G11.1
APOC4
AC005838.2
CEMP1
SNORD15A
SNHG1
SNORA8
SNORA18
SNHG15
SNORA41
SNORA72
SNORA46
SNORD94
SNORD9
SNORA77
RPL21P8
SNORA71D
SNORA38
SNORD3D
SNORD3C
SNORD3B-2
OVOL1
KREMEN2
RP11-468E2.5
MSANTD1
OSM
IER3
PIK3R3
CCDC64
PPP2R3B
DUSP9
RIPPLY3
LHFPL5
CLPSL1
BRCA1
PWWP2B
CHD7
GRHL2
ERBB3
PROM2
HMMR
CLSPN
SHCBP1
TIMM10
TFAP2C
PVRL4
GALNT6
CORO2A
MRPL14
KIF18A
PNP
FKBPL
C15orf37
TSTD1
NHLRC1
RP11-112H10.4
HDHD3
STEAP3-AS1
UBA52P5
RP11-609L3.1
GGCT
CHMP4C
FHP1
SRD5A3
DDX28
MT-TV
SLBP
LETM1
WHSC1
SH3BP2
MRPL4
CBX2
MSL3P1
MREG
BOLA3
COMMD8
RP11-757F18.3
PSD4
DEF6
ABCC3
SNORD12C
SLC38A1
RAC3
EME1
AC002069.5
TPD52
SEPHS2
PLEKHF2
COX6C
CERS6
KRT19
EML2
PPT1
G6PD
TIMM8A
MILR1
DERL3
IL1RN
C1orf106
FAM64A
CDC25A
RP11-615J4.4
RP11-592B15.3
KRT8P51
FAM84B
C5orf28
BRCC3
MRM1
NIPA1
CSTF2
MZT1
TWF2
METTL1
C12orf44
PTPRJ
HTATIP2
VGLL1
STX3
NCK2
MARK2
GATAD2A
SAPCD1
GABRD
NFYA
GSK3B
EEF1A2
DLX3
RFWD3
FAM110A
WNT3
FAM157A
S100P
PFKFB2
C17orf49
DECR2
C16orf13
RP11-350E12.5
RP11-290F20.3
MYBPH
WDR37
HRASLS
SNX8
NANP
RP13-254B10.1
SLC7A5
ADM2
GPRIN1
APEX2
TMEM79
TDRKH
S100A14
GSDMC
SFN
PERP
SH3BGRL3
LCP1
CTSZ
SDC1
RUNX1
MARVELD3
CTNNBIP1
CPA4
RAE1
CSTF1
KLRG2
DPF1
GPR19
DBNDD1
GPR158
HIST1H2BG
HIST1H2BF
HIST1H2AE
HIST1H2BK
HIST1H2BD
HIST1H2BE
HIST1H2BB
HIST1H3G
HIST1H2BI
H2AFX
HIST1H3H
HIST1H2BL
PAFAH1B3
HIST1H4A
HIST1H3D
HIST1H2BN
HIST1H3B
HIST1H2AB
HIST1H2BJ
HIST1H2AM
HIST1H2AH
HIST1H2AG
HIST1H2BO
HIST1H1B
HIST1H3C
UQCRH
MRPL11
REST
RCN2
PRIM2
TIMMDC1
C3orf17
WRNIP1
RACGAP1
CIT
POLQ
BUB1B
ZWINT
CDCA3
MKI67
CASC5
TOP2A
CENPF
ASPM
ARHGAP11A
CCNB2
CENPA
ARHGAP11B
KIFC1
KIF23
CENPE
EXO1
PRC1
FANCI
TICRR
MYBL2
CDCA8
BIRC5
PBK
CKAP2L
NUF2
BUB1
MELK
UHRF1
CCNB1
RRM2
MCM10
CEP55
CDK1
NEK2
SGOL1
KIF14
HMGA1
BAIAP2L1
EPCAM
NOP56
HMBS
POLR2H
MTHFD2
HELLS
FAM72B
FAM72A
RP13-104F24.1
FAM72D
ACAT2
RGS3
MCM5
GPN1
EPT1
CCDC117
TOPBP1
MTBP
SPC25
SKA1
DSN1
ZNF165
LRR1
UNG
DCAF7
RFC4
MCM3
MCM6
ACTL6A
DNMT1
STIL
ECT2
KIAA1524
CHEK1
PLK4
CDC7
TYMS
EZH2
KNTC1
CEP85
CHAF1B
NCAPG2
BRCA2
GSG2
NUP210
FANCD2
RP4-694A7.2
HYLS1
PATE4
PATE3
UBE2CP4
PMM2
GNG13
TBC1D7
NARF
VEGFA
MAP3K13
MFAP2
FSCN1
FOXP4
CTD-3193O13.9
ELAVL1
ARF1
MAGED1
SFXN5
C19orf57
FAM72C
GPC2
BIK
VAX2
NUDT5
CDC123
HSPA14
DHTKD1
SUV39H2
SMG5
FLAD1
B4GALT3
RCC2
PARP1
UCK2
DAP3
ZNF695
TMSB10
GEN1
TTLL4
MFI2
YOD1
LIN9
DNAH14
LRRC8B
CHML
STMN1
PFDN2
SOX11
FAM19A3
MCM8
FANCB
YEATS2-AS1
YEATS2
STIP1
C11orf84
CTPS1
SCRN1
FKBP14
RP4-607J23.2
LMO7
SCAMP5
FAM222A
SS18L2
TMEM39A
STXBP2
DCTN5
URB2
ARV1
RBM34
TRPT1
NEAT1
PTPMT1
CPT1B
SDSL
PRSS16
PPFIA4
HARBI1
SMIM13
REEP4
PYCR1
EIF4EBP1
CCDC150
TSPAN33
CDC42BPG
CAMSAP3
TRAPPC5
FOXI3
APOC2
CXCL16
C6orf132
FAM129B
CD82
TNFSF15
TMEM209
C9orf16
SUMO3
AIF1L
BACE2
UBE2Q2P2
GYLTL1B
SDF2L1
CISD1
DTYMK
TTC22
BSCL2
SORT1
CELSR2
PRKX
PANK1
PTPRF
IGSF9
MLK4
KIF1A
PRSS8
LINGO1
RP11-9E13.4
AL160471.6
SLC26A8
C2orf48
RP11-564D11.3
RP11-104H15.10
GPR137C
TFAP2A-AS1
ZNF571-AS1
TMEM89
RP11-297N6.4
RP11-1006G14.2
IBSP
C1orf100
RP11-263K19.6
AC004069.2
MC1R
GS1-293C5.1
TMEM139
FRMD5
SLC35F2
HMGA1P3
SLC16A1
HMGA1P1
TMEM251
MTX2
UBE2F
SKA2
MRPL42
RP3-368A4.5
BACH1-IT1
C14orf178
RP11-575G13.2
C18orf56
RP11-85F14.1
CTD-2510F5.2
PIGY
LYRM2
C1orf233
HNRNPA1P59
C6orf1
ENPP5
CTD-2302E22.3
BUD31
SNRPGP2
SNRPG
ZNF724P
RPL22L1
ACBD7
SCLY
RP11-159J3.1
ARNTL2
RTKN2
PSMG3
GEMIN6
NCAPG
LMNB1
MLF1IP
FAM111B
DTL
CDC6
CDCA2
ANLN
GTF2E1
HAUS2
GAR1
SNX10
SH3BP1
ORAI1
POLE3
TCFL5
STX10
TOMM22
SAMD1
ARMC6
BOLA2
DNMT3B
DIAPH3
LPCAT1
SLC25A10
OPN3
FHDC1
RP11-301G21.1
CCT5P1
LDHAP3
AC006483.5
CCDC85B
COX8A
CCDC124
SAYSD1
ISY1
STAC3
PFKFB4
GRPEL2
SYNE4
STX16-NPEPL1
CCS
TRPM2
RHBDF2
SLC50A1
PLEKHB2
FAM195A
MFSD3
FAM203A
FAM203B
TONSL
SLC52A2
KIFC3
APBA2
TRIM69
TRIB3
ASPHD2
SLC22A13
CTD-2517M14.5
PPP1R27
AC005534.8
RP11-7M8.2
CTD-2020K17.3
GPSM3
CD80
PTAFR
MYD88
LGALS9B
C1orf177
RP11-10J21.3
THEM6
OXLD1
MFSD5
ELOVL1
ESRRA
C11orf83
MRPL12
RNF220
RASGEF1A
MAD2L1BP
CRB3
TMEM129
MAFG
STRA13
ZBTB7B
MT-RNR1
PRR15L
RP11-25K21.6
SRXN1
LINC00843
TUSC2
KLHL35
CDK3
ZNF890P
C4orf46
RP1-117O3.2
CASC7
HAMP
EVI5L
CD6
LIMD2
ETV7
KIF21B
JAK3
FCGR1C
FCGR1B
PLEK
HCK
LYZ
EMR2
SAMSN1
NCF2
MSR1
LILRB2
FCER1G
FPR3
CD86
IKZF1
LRRC25
LAG3
FAM78A
CXorf21
RAP2B
LAT2
LILRB4
LAIR1
FERMT3
RAC2
CORO1A
IL2RB
SASH3
CCR1
LAP3
CTSS
ADAMDEC1
UBE2L6
HCST
GZMB
OLR1
CD300A
TREM2
UBASH3B
TNFSF13B
MYO1G
KYNU
SIRPB2
C19orf40
SIGLEC14
SDS
CDKN2D
RP11-700J17.1
SRCRB4D
CD5
TMEM186
AGTRAP
TMEM136
IPO4
IKZF2
SLC7A11
C12orf5
HK3
VOPP1
MRPS33
TMUB1
ARL2
RPPH1
RABAC1
R3HDM4
SERP1
RNF7
MTFP1
CYB561D1
GEMIN7
ZDHHC9
SLC39A14
QSOX1
SLC25A22
RPP25L
INSL3
LYPLA2
GALE
UBFD1
SMKR1
TMEM38A
FANCD2P2
ZDHHC23
HS6ST1
LRFN4
LRWD1
CTD-2630F21.1
NACC1
FARSA
STOML2
SLC25A5
JTB
APH1A
RP11-424C20.2
RAD54L
RCC1
E2F1
AURKB
KIF18B
GTSE1
LRRC37A9P
SAMD10
CDC25C
EXOSC4
SAC3D1
BRI3BP
TIMM17B
SKA3
HMGB3
PCNXL3
FKBP2
FRMD8
LAGE3
ISG15
MCM7
AP1S1
RPIA
PKMYT1
CENPM
C7orf43
OTUB1
ALG3
SRSF9
SLC25A39
CDK16
CAD
UBE2SP2
C11orf48
PTPN6
POLD1
TIMELESS
MARS
NCAPD2
FOXM1
MLF2
USP5
MRPL51
TPI1
GAPDH
TPI1P1
COPS7A
NDUFA9
LSM4
TMED9
SPINT2
SSR4
LMAN2
RP11-22P6.3
TMEM147
GPI
TIMM50
YIF1B
SIPA1L3
WDR62
NOP2
FOXP3
CHST2
BCL2L2-PABPN1
TRAIP
SMPDL3B
TMEM53
POLR2D
MFSD2A
ELOVL6
ASPHD1
NUAK2
ALKBH4
RFXANK
PGLS
SMUG1
TSPAN17
SLC37A4
PCCB
MED20
GAPDHP62
SLC35A2
POC1A
SLC2A5
CDR2L
ZDHHC12
FCHO1
SLC22A18
POLR3K
FUOM
IFI27L1
C9orf69
TUBB4A
PSPH
ENTHD2
HIST3H2BB
SPSB2
LAMP3
ILDR2
C11orf45
IL10
ZNF444
LRRC20
RP11-460N20.5
C1orf53
TMEM61
GSDMA
FAM166A
CPLX2
UNC13A
CAPN14
FSD1
TERT
C1orf134
SLC38A7
IL27RA
KCTD17
GINS3
ZNF365
LZTS1
SLA2
HTRA4
RELL2
PMAIP1
MCOLN2
KMO
IL1A
CHRNA5
CSPG5
GRHL3
CTSV
S100A7
GAL
S100A9
S100A8
PCSK1N
CELSR3
TTPAL
ORMDL1
PMCH
SSR3
ORAI2
C1orf210
C14orf119
ATP5J2-PTCD1
TMEM106C
RFC5
METTL23
RDM1
AC137932.1
AIM1L
RP11-110I1.12
HIST1H3F
HIST1H2BH
HIST1H3I
HIST1H2AJ
HIST1H2AI
HIST1H2AL
HIST1H4L
HIST1H2BM
HIST1H3A
TMEM185B
POLR1B
SLC44A2
SBK1
ASF1B
TMED3
ST14
PKP3
SLC39A11
ESRP2
TTLL12
TMEM63B
RP11-426L16.10
COPE
ADIPOR1
CLN6
RABIF
CIAPIN1
SNRPC
CSNK2B
PPP1R11
TMEM54
MAPK13
EMC8
TUBB
SLC39A7
UQCC2
NEU1
KIAA2013
ICMT
HN1
ALYREF
P4HB
TMEM104
ANAPC11
EIF4A3
ARHGDIA
NPLOC4
RCE1
CLPTM1L
SLC12A7
SYNGR3
DDA1
CCDC167
CABLES2
C8orf76
ZNRD1
GADD45GIP1
TBL2
MSH5
SLC52A3
MAGEF1
NUDT15
ESCO2
EFNA4
RAB26
FBXO41
CARD14
RP11-110G21.1
CTD-2517M22.17
ST20
AC083884.8
VAC14-AS1
TNFAIP8L2
AL359878.1
ASH1L-AS1
ABHD14A-ACY1
AC090945.1
RP11-424M22.1
LYPD2
TSC22D4
C2orf68
NSUN5P2
RP11-22B23.1
DDX12P
DDX11
PDIA5
NT5DC2
LIMK1
IKBKE
SLC12A8
TSEN54
NAT9
ZMYND19
HGS
DUS1L
LLGL2
EVPL
WDR34
TERC
TRAF2
TMEM132A
TET3
RTKN
RBBP8NL
NR2F6
GTF2IRD1
SPINT1
RAB11FIP4
SLC29A2
ANO9
AUP1
ELF3
AKT1
RAB43P1
PUS1
PABPC1L
XRCC2
LRP8
BEND3
TRIM65
MROH6
FAM213B
SLC16A3
ADAM8
SLX1A
MFSD10
DGKQ
C17orf62
P2RY6
DOK3
ABHD16B
SLC12A9
NUDT22
MGAT4B
YDJC
NDUFB7
UNC93B1
APEH
AC108938.2
AC013268.2
PTGES2
CARD9
MIIP
SIGLEC10
MAP1S
NDUFA7
NDOR1
UBL4A
KLF16
NUDT14
NTMT1
TK1
C1orf172
GTPBP3
ARHGEF16
MICALL2
LPAR2
MRPS12
ISOC2
POLR2L
COMTD1
C17orf89
METTL12
TMEM182
MRPL34
SNX15
GTF2H4
EXOSC5
CACFD1
NAIF1
FURIN
BRI3
AC016773.1
GPR157
TTYH3
TCF3
MAP4K2
TFR2
ASB7
CPNE7
C21orf67
ZNF316
SPOCD1
SIGLEC8
PRSS27
KIAA0196-AS1
PRDX4
KCTD5
RPS6KA1
PDIA6
CCT3
C1orf43
UBE2Q1
SCAMP3
LAMTOR2
GBA
UBQLN4
LMNB2
PSMD2
EIF4G1
INCENP
SPAG5
MCM4
CCNF
CHAF1A
BRMS1
PDIA4
HYOU1
F11R
IDH2
HIST2H3C
HIST2H3A
HIST2H3D
HIST2H2AA4
HIST2H2AA3
HIST2H4B
HIST2H4A
TARS
DNAJB11
GPT2
SKP2
BRIX1
SNRPF
CCT2
PGD
PSMC4
LSM14A
PITX1
SH2B2
TMEM206
SMAGP
HMGB3P6
ICAM3
COTL1
MMP9
USP41
USP18
CENPL
CCNE1
DLGAP5
CDC20
UBE2T
CDCA4
SLC11A1
IL4I1
TMEM102
RAD51AP1
PRR11
NDC80
FAM83D
TPX2
PTTG1
ESPL1
CDT1
TCF19
NMU
NMI
RP11-18B3.2
TXNDC17
TMEFF1
TREM1
GJB2
EFNA3
EFNA1
TAGLN2
CD24P4
2021-09-03
GTF3A
EPRS
BPNT1
INTS7
TGFBRAP1
LRRC8E
SLC22A1
TBL1XR1
ARPC5L
ZDHHC13
WDR53
HAUS8
SENP5
NCBP2
RP11-1035H13.3
SLC16A10
C18orf32
RP11-599J14.2
AP001469.5
PTPN7
ANKRD22
PAQR4
METTL13
IRAK1
FAM189B
APOA1BP
TACC3
ORC6
PPIF
STX6
ARPC5
POGK
C1orf85
TOMM5
C11orf82
NDC1
MRPL37
CKS1B
MRPL48
MEA1
UBE2C
DEPDC1
NCAPH
GINS1
NEIL3
CDKN3
DEPDC1B
TTK
IQGAP3
HJURP
PLK1
NUSAP1
KIF20A
MAD2L1
CDK5
THAP5P1
SPC24
KIAA0101
CDCA5
AUNIP
C15orf48
PSRC1
CDCA7
E2F2
KIF4A
KIF2C
RECQL4
PIF1
KIF15
NHSL1
GCNT1
MIR4435-1HG
ESM1
C5orf46
CAMK1D
ABL2
PDXK
CSTB
ZIC4
ZIC1
MMS22L
LINC00998
TMEM183A
LAD1
FAM83G
TMEM189
RFC2
NOD2
C1orf74
UBALD2
FAM104A
HPN-AS1
GPRIN2
RP11-144N1.4
PDK1
MYLK2
FA2H
NT5DC4
SLC36A1
RPP40
RP11-386G11.10
NXT2
WDHD1
H2AFV
PURB
KIAA1161
GSKIP
TPI1P2
CLEC18B
STRIP2
MTFR2
HLA-V
HCP5
AP003068.23
MACC1
IL18
NETO2
IPMK
GGH
FABP5
KLHDC7B
CXCL13
RAB15
CA2
TEX30
FUT3
CHI3L1
KRT81
GJB4
AP000295.9
NKX6-1
ARHGAP4
PSAT1
MYO10
NABP1
CEP72
PLAUR
ICAM1
IL8
BCL2A1
SRSF2
SBNO2
RELT
MYO9B
SAT1
IER5L
ZBED6CL
PLXNA3
NAA10
SLC10A3
RBBP9
BAX
ACN9
FAM53A
MTL5
HOMER3
CENPW
RN7SKP255
ARIH2OS
RP11-345J4.5
APOBEC3B
EEF1E1
DCLRE1B
C12orf45
PPIL1
XRCC4
CCDC137
CENPN
BRIP1
CENPO
PARPBP
KIF11
ASB16-AS1
AC067945.3
RP11-453E17.3
METTL8
OR2B6
OR2B2
RP5-1052M9.1
MIR635
VN1R1
RP11-174G6.5
RP11-211A18.1
SNHG16
MIR429
SPTBN2
MEX3A
DSP
ZNF239
SLC25A16
U47924.30
MIR563
YJEFN3
RP11-832N8.1
RP11-658F2.3
SLC25A5P1
NFE2L3
RANP6
RANP1
PABPC3
PABPC1P1
ATP5C1P1
SETP14
SET
SETP8
RP11-227D13.2
FZD6
SNORD78
GAS5
SMC4
GMPS
SPDL1
SRPK1
DNA2
USP1
RMI1
KIF20B
KPNA2
CKS2
GAS2L3
SGOL2
PAK1IP1
E2F3
PIGW
UHMK1
METTL18
MND1
CCNA2
PSMD14
CSE1L
SHFM1
PSMA4
ACTR3
SNRPD1
SMC2
RALA
PFDN4
GTF3C6
STRAP
DDX21
TIPRL
PDCD5
UCHL5
PSMD12
CACYBPP2
CACYBP
SRP9P1
SNRPEP4
SNRPEP2
XPOT
SMS
KCMF1
CKAP2
BORA
EML4
CMAS
ASUN
MTIF2
MSH2
RP11-417L14.1
MIR548AA1
RIPK2
HENMT1
C7orf25
TPMTP1
YBX1P10
YBX1P1
YBX1
RALBP1
CLEC7A
ARHGAP30
NUS1P1
NUS1
RP11-570P14.1
TSEN15
DNAJC21
DSG2
COX20
ZNF639
MCUR1
DESI2
ADSS
MEX3C
NAA50
CALU
HCCS
MRPL47
DCUN1D1
ATP13A3
YES1
PI4K2B
MSANTD3
SSX2IP
HOOK1
RP11-15L13.4
PPCS
ABRACL
LDHAP4
LDHA
SCD
PTP4A2
CDV3
TMX1
PSMA6
MRGBP
DSCC1
DAPP1
RANP2
DCAF13P1
YWHAB
PSMA5
PFDN6
RAD21
NRAS
ATP6V1C1
ENY2
DCAF13
CBX3
YWHAZ
AZIN1
NUDCD1
TMEM65
OCIAD2
HSPE1
SLMO2
PPA1
COX5A
DCUN1D5
CHRAC1
PSMB2
HPRT1
VBP1
ACTR2
MRPL15
E2F5
VAMP8
ESRP1
MAL2
STARD7
SNRPB
AAGAB
SQLE
MTERFD1
PSMA7
DERL1
PTDSS1
NDUFAF6
BZW2
RRP36
ENOPH1
PPAT
PAICS
RP11-395L14.17
ICT1
HEATR3
GSPT1
GPD2
PNO1
NOL11
NLN
MYBL1
DCK
MTCH2
CKAP5
TIMM17A
SNRPE
CMC2
APOO
YWHAZP5
YWHAZP2
YWHAZP3
POLR2K
TATDN1
NDUFB9
AC093106.5
S100A11P1
PHF20L1
NSMCE2
FAM49B
MRPL13
FAM91A1
TBC1D31
UBXN2B
SNRPA1
PDAP1
PUS7
GRSF1
MTHFD2P5
NUDT19
FKBP4
C11orf31
PABPC1
OLA1
MRS2
WDR3
TTF2
ZWILCH
FAM96A
MAZ
C20orf24
PIGX
RANGAP1
COLGALT1
DDX49
PPP1R14BP3
PPP1R14B
B4GALT2
RANBP1
DHCR7
CDK2AP1
SELRC1
MIEF1
ZNF598
POP1
KNOP1
TRAF7
DNAJA3
RTCA
RGS10
DNAJA1
CCDC58
HDGF
FDPS
PRCC
CHD1L
TARS2
AURKA
ATAD2
TAF4
SIKE1
GTPBP4
GOLPH3
TUFT1
RRS1
DKC1
UQCRFS1P1
UQCRFS1
PDCD2L
TRIM59
GMPSP1
GAPDHP72
GAPDHP60
RP11-543B16.2
PRELID1
AC016734.2
GAPDHP65
GAPDHP1
GAPDHP63
GAPDHP40
GAPDHP38
ZNF146
LSR
TPI1P4
AC016700.4
TIAM1
RP11-274J2.1
UPK3BL
MIR559
HMGA1P8
HMGA1P2
C15orf39
ARL4C
RP3-514P16.1
PRKCI
RP11-665C16.8
PKMP5
PKM
PLS1
MRPL33
MDK
RUSC1-AS1
RP5-1047A19.4
RP4-758J18.13
RP11-111M22.2
RP11-18I14.10
RP11-638I8.1
GUCY1B2
RP11-351E7.2
CTD-2340F8.1
AL162415.2
NOL5BP
GAPDHP64
RPLP0P2
RP11-344P13.3
CTB-167G5.3
TRAJ8
TRAJ27
TRAJ31
TRAJ23
TRAJ9
TRAJ30
TRAJ29
TRAJ43
TRAJ3
WARS
UBD
RNF213
HELZ2
SIGLEC1
IFIT3
IFI35
PARP12
OAS3
PARP9
PARP14
DTX3L
CXCR2P1
IFIH1
DDX58
MX1
IFI44
IFI44L
ZBP1
LPAR5
MX2
RSAD2
OAS1
CMPK2
RTP4
OASL
CXCL11
OAS2
IFI6
XXbac-B476C20.9
RP11-480A16.1
PARS2
MID1IP1
CCDC115
YRDC
SEC61G
NFKBIE
FADD
SRD5A1
NUDT1
RP11-390P2.2
RAVER1
MRPL2
EIF6
EBP
NAA40
SLC2A1
RBM38
PNKD
THEMIS2
RELB
NFKBID
TOMM40
QPCTL
SHKBP1
C17orf53
UBE2SP1
UBE2S
MBOAT7
NFKBIB
FAM214B
ALKBH6
BCL3
ZGPAT
RPP21
ZNF2
TMEM201
RP11-74C1.2
TSSC1
LEPREL4
DPP3
CHTF18
PLCXD1
POP7
MRPL17
RNF166
FBXL19
CMTM1
RP5-1180C10.2
RGS14
CCDC120
TSPO
CRELD2
MVD
PGP
EPN3
TMPPE
ORC1
BLM
E2F8
SLC25A19
NRM
C12orf49
SUSD4
BAK1
AURKAIP1
ZBTB9
RHPN1
ILDR1
PYCRL
ADCK5
RP4-778K6.3
TRIM11
RNF121
RBM12B-AS1
FOSL1P1
ZMYND15
RCCD1
DNAH10OS
SPRN
RP11-443B20.1
RP11-161H23.10
MDGA1
SERPINB8
ABCA7
EXOSC6
UTP23
RP11-450D21.1
BLOC1S6
ZHX1-C8ORF76
LSM1
GLRX2
CENPQ
FBXO45
VKORC1
LRRC42
RAD1
SLC25A44
IL1B
TUBB3
CEBPG
FBXO5
DLEU1
TAF1A
CCSAP
TROAP
TEAD4
KNSTRN
CENPI
FEN1
TRIP13
RNASEH2A
PCNA
CENPK
E2F7
TP53RK
SNRNP25
LSM2
WDYHV1
RPA3
H2BFS
UPP1
PLA2G7
WDR76
NXT1
OIP5
ISG20
S100A16
PKMP1
MST1R
LRRC45
ABCD1
TSTA3
GALK1
UAP1L1
SLC35C1
PPP1R35
AC004381.6
ZNF408
POGLUT1
WIBG
DENND1C
PTP4A3
PITPNM1
TNIP2
CPPED1
SLC15A3
DNASE1L1
FBXL15
FAM71E1
VWA1
ATAD3C
S100A2
NXPH4
AFAP1-AS1
TNF
KLK14
MYCN
LEF1
BOLL
AC015849.16
LIME1
FJX1
DEFB1
TRIM58
TANC2
NEK6
SGPL1
GPR141
EPHB2
MYCL
DMP1
OSBPL3
KCNE3
ANKS6
S100A13
RP1-102K2.8
LINC00176
AMN
XPR1
IL1RAP
PLAGL2
TRBV7-6
TRBV5-5
OR13H1
FASTKD1
EHHADH
CHCHD10
OXSM
C1orf147
INPPL1
CBS
RASSF7
SLC5A3
PFKP
SYK
DHCR24
ZBTB42
TNFAIP2
TNS3
CFB
GSDMD
REC8
FGF18
TMPRSS4
CXXC5
LAMA5
AGRN
SOX12
TPRN
SEMA3F
FLOT1
CP
HIGD1A
FAM162A
ICAM4
GXYLT1
PSMA6P2
METTL7B
TNFSF14
SKIL
NIPA2
LRRC41
ATXN7L3
PGM2L1
[truncated: 493 more rows]

## Sheet: Module2_UpInTumor_GO
query	significant	p_value	term_size	query_size	intersection_size	precision	recall	term_id	source	term_name	effective_domain_size
query_1	TRUE	0.00873342	11	539	8	0.0148423	0.727273	CORUM:7394	CORUM	CENP-H-I complex	3624
query_1	TRUE	0.00873342	77	539	26	0.0482375	0.337662	CORUM:320	CORUM	55S ribosome, mitochondrial	3624
query_1	TRUE	0.00873342	6	539	6	0.0111317	1	CORUM:387	CORUM	MCM complex	3624
query_1	TRUE	0.00943784	5	539	5	0.00927644	1	CORUM:157	CORUM	Condensin I complex	3624
query_1	TRUE	0.00943784	47	539	18	0.0333952	0.382979	CORUM:324	CORUM	39S ribosomal subunit, mitochondrial	3624
query_1	TRUE	0.00943784	5	539	5	0.00927644	1	CORUM:167	CORUM	Condensin I complex	3624
query_1	TRUE	0.00943784	7	539	6	0.0111317	0.857143	CORUM:159	CORUM	Condensin I-PARP-1-XRCC1 complex	3624
query_1	TRUE	0.00943784	5	539	5	0.00927644	1	CORUM:10	CORUM	Condensin I complex	3624
query_1	TRUE	0.0340585	6	539	5	0.00927644	0.833333	CORUM:6304	CORUM	DDX11-Ctf18-RFC complex	3624
query_1	TRUE	0.0340585	6	539	5	0.00927644	0.833333	CORUM:2797	CORUM	PCNA-CHL12-RFC2-5 complex	3624
query_1	TRUE	0.0340585	4	539	4	0.00742115	1	CORUM:2792	CORUM	MCM2-MCM4-MCM6-MCM7 complex	3624
query_1	TRUE	0.0340585	4	539	4	0.00742115	1	CORUM:127	CORUM	NDC80 kinetochore complex	3624
query_1	TRUE	0.0340585	4	539	4	0.00742115	1	CORUM:678	CORUM	GINS complex	3624
query_1	TRUE	0.0340585	4	539	4	0.00742115	1	CORUM:1118	CORUM	Chromosomal passenger complex CPC (INCENP, CDCA8, BIRC5, AURKB)	3624
query_1	TRUE	0.0340585	4	539	4	0.00742115	1	CORUM:1119	CORUM	Chromosomal passenger complex CPC (INCENP, CDCA8, BIRC5, AURKB)	3624
query_1	TRUE	0.0366679	15	539	8	0.0148423	0.533333	CORUM:1143	CORUM	SMN complex	3624
query_1	TRUE	2.73269e-33	1069	1830	246	0.134426	0.230122	GO:0000278	GO:BP	mitotic cell cycle	18092
query_1	TRUE	3.84188e-32	921	1830	220	0.120219	0.238871	GO:1903047	GO:BP	mitotic cell cycle process	18092
query_1	TRUE	3.11944e-25	1447	1830	280	0.153005	0.193504	GO:0022402	GO:BP	cell cycle process	18092
query_1	TRUE	3.11944e-25	1914	1830	343	0.187432	0.179206	GO:0007049	GO:BP	cell cycle	18092
query_1	TRUE	5.48857e-24	330	1830	104	0.0568306	0.315152	GO:0007059	GO:BP	chromosome segregation	18092
query_1	TRUE	2.92913e-23	300	1830	97	0.0530055	0.323333	GO:0140014	GO:BP	mitotic nuclear division	18092
query_1	TRUE	5.76029e-22	626	1830	151	0.0825137	0.241214	GO:0051301	GO:BP	cell division	18092
query_1	TRUE	2.25179e-20	451	1830	119	0.0650273	0.263858	GO:0000280	GO:BP	nuclear division	18092
query_1	TRUE	2.51818e-20	161	1830	64	0.0349727	0.397516	GO:0000070	GO:BP	mitotic sister chromatid segregation	18092
query_1	TRUE	1.42475e-19	189	1830	69	0.0377049	0.365079	GO:0000819	GO:BP	sister chromatid segregation	18092
query_1	TRUE	6.39598e-19	500	1830	124	0.0677596	0.248	GO:0048285	GO:BP	organelle fission	18092
query_1	TRUE	2.05528e-18	164	1830	62	0.0338798	0.378049	GO:0006261	GO:BP	DNA-dependent DNA replication	18092
query_1	TRUE	2.21826e-18	967	1830	193	0.105464	0.199586	GO:0006259	GO:BP	DNA metabolic process	18092
query_1	TRUE	6.94381e-18	269	1830	82	0.0448087	0.304833	GO:0098813	GO:BP	nuclear chromosome segregation	18092
query_1	TRUE	3.90716e-17	287	1830	84	0.0459016	0.292683	GO:0006260	GO:BP	DNA replication	18092
query_1	TRUE	5.27306e-17	611	1830	137	0.0748634	0.224223	GO:0044772	GO:BP	mitotic cell cycle phase transition	18092
query_1	TRUE	3.89308e-16	658	1830	142	0.0775956	0.215805	GO:0044770	GO:BP	cell cycle phase transition	18092
query_1	TRUE	4.35748e-13	189	1830	59	0.0322404	0.312169	GO:0007051	GO:BP	spindle organization	18092
query_1	TRUE	5.91198e-13	6767	1830	842	0.460109	0.124427	GO:0071840	GO:BP	cellular component organization or biogenesis	18092
query_1	TRUE	1.21695e-12	6576	1830	820	0.448087	0.124696	GO:0016043	GO:BP	cellular component organization	18092
query_1	TRUE	1.50671e-12	4115	1830	553	0.302186	0.134386	GO:0006996	GO:BP	organelle organization	18092
query_1	TRUE	5.17652e-12	1310	1830	219	0.119672	0.167176	GO:0002252	GO:BP	immune effector process	18092
query_1	TRUE	4.14024e-11	577	1830	117	0.0639344	0.202773	GO:0006281	GO:BP	DNA repair	18092
query_1	TRUE	4.45615e-11	719	1830	137	0.0748634	0.190542	GO:0002366	GO:BP	leukocyte activation involved in immune response	18092
query_1	TRUE	4.45615e-11	627	1830	124	0.0677596	0.197767	GO:0007346	GO:BP	regulation of mitotic cell cycle	18092
query_1	TRUE	5.13585e-11	150	1830	48	0.0262295	0.32	GO:1902850	GO:BP	microtubule cytoskeleton organization involved in mitosis	18092
query_1	TRUE	6.25445e-11	723	1830	137	0.0748634	0.189488	GO:0002263	GO:BP	cell activation involved in immune response	18092
query_1	TRUE	1.35571e-10	4199	1830	551	0.301093	0.131222	GO:0006950	GO:BP	response to stress	18092
query_1	TRUE	1.53676e-10	1246	1830	205	0.112022	0.164526	GO:0051726	GO:BP	regulation of cell cycle	18092
query_1	TRUE	1.89525e-10	889	1830	158	0.0863388	0.177728	GO:0006974	GO:BP	cellular response to DNA damage stimulus	18092
query_1	TRUE	2.07237e-10	140	1830	45	0.0245902	0.321429	GO:0000724	GO:BP	double-strand break repair via homologous recombination	18092
query_1	TRUE	2.44696e-10	1261	1830	206	0.112568	0.163362	GO:0051276	GO:BP	chromosome organization	18092
query_1	TRUE	2.90154e-10	121	1830	41	0.0224044	0.338843	GO:0007052	GO:BP	mitotic spindle organization	18092
query_1	TRUE	3.31523e-10	142	1830	45	0.0245902	0.316901	GO:0000725	GO:BP	recombinational repair	18092
query_1	TRUE	4.9678e-10	300	1830	72	0.0393443	0.24	GO:0006310	GO:BP	DNA recombination	18092
query_1	TRUE	5.23034e-10	539	1830	108	0.0590164	0.200371	GO:0043299	GO:BP	leukocyte degranulation	18092
query_1	TRUE	5.23034e-10	222	1830	59	0.0322404	0.265766	GO:0000075	GO:BP	cell cycle checkpoint	18092
query_1	TRUE	6.75158e-10	808	1830	145	0.079235	0.179455	GO:0010564	GO:BP	regulation of cell cycle process	18092
query_1	TRUE	9.38519e-10	317	1830	74	0.0404372	0.233438	GO:0046034	GO:BP	ATP metabolic process	18092
query_1	TRUE	9.38519e-10	1242	1830	201	0.109836	0.161836	GO:0034097	GO:BP	response to cytokine	18092
query_1	TRUE	1.44677e-09	556	1830	109	0.0595628	0.196043	GO:0002444	GO:BP	myeloid leukocyte mediated immunity	18092
query_1	TRUE	1.44677e-09	549	1830	108	0.0590164	0.196721	GO:0002275	GO:BP	myeloid cell activation involved in immune response	18092
query_1	TRUE	1.44677e-09	500	1830	101	0.0551913	0.202	GO:0042119	GO:BP	neutrophil activation	18092
query_1	TRUE	1.44677e-09	2126	1830	308	0.168306	0.144873	GO:0033554	GO:BP	cellular response to stress	18092
query_1	TRUE	2.21204e-09	1974	1830	289	0.157923	0.146403	GO:0043933	GO:BP	protein-containing complex subunit organization	18092
query_1	TRUE	2.38802e-09	498	1830	100	0.0546448	0.200803	GO:0002446	GO:BP	neutrophil mediated immunity	18092
query_1	TRUE	2.38802e-09	484	1830	98	0.0535519	0.202479	GO:0043312	GO:BP	neutrophil degranulation	18092
query_1	TRUE	2.38802e-09	337	1830	76	0.0415301	0.225519	GO:0045930	GO:BP	negative regulation of mitotic cell cycle	18092
query_1	TRUE	2.71631e-09	2326	1830	330	0.180328	0.141874	GO:0006955	GO:BP	immune response	18092
query_1	TRUE	2.89892e-09	507	1830	101	0.0551913	0.199211	GO:0036230	GO:BP	granulocyte activation	18092
query_1	TRUE	2.92015e-09	174	1830	49	0.026776	0.281609	GO:0002478	GO:BP	antigen processing and presentation of exogenous peptide antigen	18092
query_1	TRUE	3.08314e-09	487	1830	98	0.0535519	0.201232	GO:0002283	GO:BP	neutrophil activation involved in immune response	18092
query_1	TRUE	4.43898e-09	60	1830	26	0.0142077	0.433333	GO:0010965	GO:BP	regulation of mitotic sister chromatid separation	18092
query_1	TRUE	4.79602e-09	1510	1830	231	0.12623	0.15298	GO:0001775	GO:BP	cell activation	18092
query_1	TRUE	5.00515e-09	450	1830	92	0.0502732	0.204444	GO:1901990	GO:BP	regulation of mitotic cell cycle phase transition	18092
query_1	TRUE	5.78614e-09	65	1830	27	0.0147541	0.415385	GO:0044786	GO:BP	cell cycle DNA replication	18092
query_1	TRUE	6.8295e-09	1346	1830	210	0.114754	0.156018	GO:0045321	GO:BP	leukocyte activation	18092
query_1	TRUE	8.54794e-09	66	1830	27	0.0147541	0.409091	GO:0033045	GO:BP	regulation of sister chromatid segregation	18092
query_1	TRUE	1.01311e-08	491	1830	97	0.0530055	0.197556	GO:1901987	GO:BP	regulation of cell cycle phase transition	18092
query_1	TRUE	1.01311e-08	192	1830	51	0.0278689	0.265625	GO:0048002	GO:BP	antigen processing and presentation of peptide antigen	18092
query_1	TRUE	1.01311e-08	169	1830	47	0.0256831	0.278107	GO:0007093	GO:BP	mitotic cell cycle checkpoint	18092
query_1	TRUE	1.02094e-08	234	1830	58	0.031694	0.247863	GO:0019882	GO:BP	antigen processing and presentation	18092
query_1	TRUE	1.03661e-08	58	1830	25	0.0136612	0.431034	GO:0007091	GO:BP	metaphase/anaphase transition of mitotic cell cycle	18092
query_1	TRUE	1.15861e-08	1148	1830	184	0.100546	0.160279	GO:0071345	GO:BP	cellular response to cytokine stimulus	18092
query_1	TRUE	1.15861e-08	3322	1830	440	0.240437	0.13245	GO:0002376	GO:BP	immune system process	18092
query_1	TRUE	1.15861e-08	891	1830	151	0.0825137	0.169473	GO:0002443	GO:BP	leukocyte mediated immunity	18092
query_1	TRUE	1.15861e-08	673	1830	122	0.0666667	0.181278	GO:0002274	GO:BP	myeloid leukocyte activation	18092
query_1	TRUE	1.26588e-08	182	1830	49	0.026776	0.269231	GO:0019884	GO:BP	antigen processing and presentation of exogenous antigen	18092
query_1	TRUE	1.28833e-08	63	1830	26	0.0142077	0.412698	GO:0051306	GO:BP	mitotic sister chromatid separation	18092
query_1	TRUE	1.52084e-08	268	1830	63	0.0344262	0.235075	GO:0006302	GO:BP	double-strand break repair	18092
query_1	TRUE	1.67124e-08	82	1830	30	0.0163934	0.365854	GO:0051983	GO:BP	regulation of chromosome segregation	18092
query_1	TRUE	1.67564e-08	43	1830	21	0.0114754	0.488372	GO:0006270	GO:BP	DNA replication initiation	18092
query_1	TRUE	1.9412e-08	799	1830	138	0.0754098	0.172716	GO:0045055	GO:BP	regulated exocytosis	18092
query_1	TRUE	2.03603e-08	3562	1830	465	0.254098	0.130545	GO:0051641	GO:BP	cellular localization	18092
query_1	TRUE	2.11844e-08	60	1830	25	0.0136612	0.416667	GO:0044784	GO:BP	metaphase/anaphase transition of cell cycle	18092
query_1	TRUE	2.38295e-08	56	1830	24	0.0131148	0.428571	GO:0030071	GO:BP	regulation of mitotic metaphase/anaphase transition	18092
query_1	TRUE	2.84308e-08	152	1830	43	0.0234973	0.282895	GO:0006119	GO:BP	oxidative phosphorylation	18092
query_1	TRUE	2.91244e-08	812	1830	139	0.0759563	0.171182	GO:0019221	GO:BP	cytokine-mediated signaling pathway	18092
query_1	TRUE	3.18012e-08	94	1830	32	0.0174863	0.340426	GO:0051304	GO:BP	chromosome separation	18092
query_1	TRUE	3.30962e-08	280	1830	64	0.0349727	0.228571	GO:0044839	GO:BP	cell cycle G2/M phase transition	18092
query_1	TRUE	3.31699e-08	261	1830	61	0.0333333	0.233716	GO:0000086	GO:BP	G2/M transition of mitotic cell cycle	18092
query_1	TRUE	3.54108e-08	5398	1830	663	0.362295	0.122823	GO:0051234	GO:BP	establishment of localization	18092
query_1	TRUE	3.66786e-08	66	1830	26	0.0142077	0.393939	GO:1905818	GO:BP	regulation of chromosome separation	18092
query_1	TRUE	4.01292e-08	100	1830	33	0.0180328	0.33	GO:0042773	GO:BP	ATP synthesis coupled electron transport	18092
query_1	TRUE	5.13592e-08	58	1830	24	0.0131148	0.413793	GO:1902099	GO:BP	regulation of metaphase/anaphase transition of cell cycle	18092
query_1	TRUE	8.74907e-08	187	1830	48	0.0262295	0.256684	GO:0022900	GO:BP	electron transport chain	18092
query_1	TRUE	8.74907e-08	360	1830	75	0.0409836	0.208333	GO:0071103	GO:BP	DNA conformation change	18092
query_1	TRUE	8.74907e-08	274	1830	62	0.0338798	0.226277	GO:1901988	GO:BP	negative regulation of cell cycle phase transition	18092
query_1	TRUE	8.74907e-08	108	1830	34	0.0185792	0.314815	GO:0007088	GO:BP	regulation of mitotic nuclear division	18092
query_1	TRUE	9.76483e-08	921	1830	151	0.0825137	0.163952	GO:0006887	GO:BP	exocytosis	18092
query_1	TRUE	9.76483e-08	617	1830	111	0.0606557	0.179903	GO:0000226	GO:BP	microtubule cytoskeleton organization	18092
query_1	TRUE	1.0003e-07	647	1830	115	0.0628415	0.177743	GO:0045786	GO:BP	negative regulation of cell cycle	18092
query_1	TRUE	1.06751e-07	2840	1830	379	0.207104	0.133451	GO:0051649	GO:BP	establishment of localization in cell	18092
query_1	TRUE	1.06751e-07	60	1830	24	0.0131148	0.4	GO:0033260	GO:BP	nuclear DNA replication	18092
query_1	TRUE	1.10104e-07	219	1830	53	0.0289617	0.242009	GO:1902749	GO:BP	regulation of cell cycle G2/M phase transition	18092
query_1	TRUE	1.1693e-07	99	1830	32	0.0174863	0.323232	GO:0042775	GO:BP	mitochondrial ATP synthesis coupled electron transport	18092
query_1	TRUE	1.21026e-07	84	1830	29	0.015847	0.345238	GO:0031145	GO:BP	anaphase-promoting complex-dependent catabolic process	18092
query_1	TRUE	1.37788e-07	202	1830	50	0.0273224	0.247525	GO:0010389	GO:BP	regulation of G2/M transition of mitotic cell cycle	18092
query_1	TRUE	1.6918e-07	366	1830	75	0.0409836	0.204918	GO:0010948	GO:BP	negative regulation of cell cycle process	18092
query_1	TRUE	2.35461e-07	288	1830	63	0.0344262	0.21875	GO:0000082	GO:BP	G1/S transition of mitotic cell cycle	18092
query_1	TRUE	2.52943e-07	118	1830	35	0.0191257	0.29661	GO:0022904	GO:BP	respiratory electron transport chain	18092
query_1	TRUE	3.9816e-07	109	1830	33	0.0180328	0.302752	GO:1902750	GO:BP	negative regulation of cell cycle G2/M phase transition	18092
query_1	TRUE	4.32284e-07	104	1830	32	0.0174863	0.307692	GO:0006415	GO:BP	translational termination	18092
query_1	TRUE	4.52227e-07	1224	1830	186	0.101639	0.151961	GO:0033043	GO:BP	regulation of organelle organization	18092
query_1	TRUE	4.58602e-07	203	1830	49	0.026776	0.241379	GO:1903046	GO:BP	meiotic cell cycle process	18092
query_1	TRUE	4.62214e-07	1689	1830	242	0.13224	0.14328	GO:0065003	GO:BP	protein-containing complex assembly	18092
query_1	TRUE	5.0495e-07	314	1830	66	0.0360656	0.210191	GO:0044843	GO:BP	cell cycle G1/S phase transition	18092
query_1	TRUE	5.0495e-07	12	1830	10	0.00546448	0.833333	GO:0000727	GO:BP	double-strand break repair via break-induced replication	18092
query_1	TRUE	5.38657e-07	255	1830	57	0.0311475	0.223529	GO:1901991	GO:BP	negative regulation of mitotic cell cycle phase transition	18092
query_1	TRUE	6.90752e-07	80	1830	27	0.0147541	0.3375	GO:0042590	GO:BP	antigen processing and presentation of exogenous peptide antigen via MHC class I	18092
query_1	TRUE	1.11462e-06	62	1830	23	0.0125683	0.370968	GO:0051310	GO:BP	metaphase plate congression	18092
query_1	TRUE	1.19278e-06	87	1830	28	0.0153005	0.321839	GO:0070125	GO:BP	mitochondrial translational elongation	18092
query_1	TRUE	1.56795e-06	88	1830	28	0.0153005	0.318182	GO:0070126	GO:BP	mitochondrial translational termination	18092
query_1	TRUE	1.65839e-06	45	1830	19	0.0103825	0.422222	GO:0045839	GO:BP	negative regulation of mitotic nuclear division	18092
query_1	TRUE	1.65932e-06	3098	1830	400	0.218579	0.129116	GO:0006796	GO:BP	phosphate-containing compound metabolic process	18092
query_1	TRUE	2.05356e-06	548	1830	97	0.0530055	0.177007	GO:0006091	GO:BP	generation of precursor metabolites and energy	18092
query_1	TRUE	2.13397e-06	285	1830	60	0.0327869	0.210526	GO:0022409	GO:BP	positive regulation of cell-cell adhesion	18092
query_1	TRUE	2.29528e-06	3125	1830	402	0.219672	0.12864	GO:0006793	GO:BP	phosphorus metabolic process	18092
query_1	TRUE	2.63942e-06	1222	1830	182	0.0994536	0.148936	GO:0098542	GO:BP	defense response to other organism	18092
query_1	TRUE	2.83968e-06	80	1830	26	0.0142077	0.325	GO:0050000	GO:BP	chromosome localization	18092
query_1	TRUE	2.83968e-06	2157	1830	292	0.159563	0.135373	GO:0016310	GO:BP	phosphorylation	18092
query_1	TRUE	2.83968e-06	80	1830	26	0.0142077	0.325	GO:0051303	GO:BP	establishment of chromosome localization	18092
query_1	TRUE	2.87862e-06	118	1830	33	0.0180328	0.279661	GO:0051225	GO:BP	spindle assembly	18092
query_1	TRUE	2.87862e-06	75	1830	25	0.0136612	0.333333	GO:0002479	GO:BP	antigen processing and presentation of exogenous peptide antigen via MHC class I, TAP-dependent	18092
query_1	TRUE	3.48984e-06	23	1830	13	0.00710383	0.565217	GO:0051383	GO:BP	kinetochore organization	18092
query_1	TRUE	3.737e-06	97	1830	29	0.015847	0.298969	GO:0010972	GO:BP	negative regulation of G2/M transition of mitotic cell cycle	18092
query_1	TRUE	4.00853e-06	137	1830	36	0.0196721	0.262774	GO:0051783	GO:BP	regulation of nuclear division	18092
query_1	TRUE	4.56234e-06	39	1830	17	0.00928962	0.435897	GO:2000816	GO:BP	negative regulation of mitotic sister chromatid separation	18092
query_1	TRUE	4.56234e-06	39	1830	17	0.00928962	0.435897	GO:0033046	GO:BP	negative regulation of sister chromatid segregation	18092
query_1	TRUE	4.56234e-06	39	1830	17	0.00928962	0.435897	GO:0033048	GO:BP	negative regulation of mitotic sister chromatid segregation	18092
query_1	TRUE	5.93942e-06	53	1830	20	0.010929	0.377358	GO:0051784	GO:BP	negative regulation of nuclear division	18092
query_1	TRUE	6.09436e-06	227	1830	50	0.0273224	0.220264	GO:0043624	GO:BP	cellular protein complex disassembly	18092
query_1	TRUE	6.80118e-06	10855	1830	1201	0.656284	0.11064	GO:0044237	GO:BP	cellular metabolic process	18092
query_1	TRUE	6.92174e-06	40	1830	17	0.00928962	0.425	GO:0051985	GO:BP	negative regulation of chromosome segregation	18092
query_1	TRUE	6.92174e-06	40	1830	17	0.00928962	0.425	GO:1905819	GO:BP	negative regulation of chromosome separation	18092
query_1	TRUE	7.76845e-06	5259	1830	629	0.343716	0.119604	GO:0006810	GO:BP	transport	18092
query_1	TRUE	8.63516e-06	263	1830	55	0.0300546	0.209125	GO:0051321	GO:BP	meiotic cell cycle	18092
query_1	TRUE	8.97379e-06	69	1830	23	0.0125683	0.333333	GO:0032623	GO:BP	interleukin-2 production	18092
query_1	TRUE	1.05419e-05	113	1830	31	0.0169399	0.274336	GO:0032508	GO:BP	DNA duplex unwinding	18092
query_1	TRUE	1.17639e-05	2272	1830	301	0.164481	0.132482	GO:0044419	GO:BP	biological process involved in interspecies interaction between organisms	18092
query_1	TRUE	1.17639e-05	37	1830	16	0.00874317	0.432432	GO:0045841	GO:BP	negative regulation of mitotic metaphase/anaphase transition	18092
query_1	TRUE	1.25933e-05	187	1830	43	0.0234973	0.229947	GO:0140013	GO:BP	meiotic nuclear division	18092
query_1	TRUE	1.32903e-05	120	1830	32	0.0174863	0.266667	GO:0032392	GO:BP	DNA geometric change	18092
query_1	TRUE	1.40676e-05	999	1830	151	0.0825137	0.151151	GO:0045087	GO:BP	innate immune response	18092
query_1	TRUE	1.51805e-05	42	1830	17	0.00928962	0.404762	GO:0033047	GO:BP	regulation of mitotic sister chromatid segregation	18092
query_1	TRUE	1.5603e-05	241	1830	51	0.0278689	0.211618	GO:1903039	GO:BP	positive regulation of leukocyte cell-cell adhesion	18092
query_1	TRUE	1.75435e-05	38	1830	16	0.00874317	0.421053	GO:1902100	GO:BP	negative regulation of metaphase/anaphase transition of cell cycle	18092
query_1	TRUE	1.75435e-05	164	1830	39	0.0213115	0.237805	GO:0031570	GO:BP	DNA integrity checkpoint	18092
query_1	TRUE	1.93732e-05	99	1830	28	0.0153005	0.282828	GO:0034340	GO:BP	response to type I interferon	18092
query_1	TRUE	1.94802e-05	34	1830	15	0.00819672	0.441176	GO:0000083	GO:BP	regulation of transcription involved in G1/S transition of mitotic cell cycle	18092
query_1	TRUE	1.9609e-05	26	1830	13	0.00710383	0.5	GO:0022616	GO:BP	DNA strand elongation	18092
query_1	TRUE	2.08087e-05	570	1830	96	0.052459	0.168421	GO:0007005	GO:BP	mitochondrion organization	18092
query_1	TRUE	2.28644e-05	19	1830	11	0.00601093	0.578947	GO:0006271	GO:BP	DNA strand elongation involved in DNA replication	18092
query_1	TRUE	2.31781e-05	1450	1830	204	0.111475	0.14069	GO:0140352	GO:BP	export from cell	18092
query_1	TRUE	2.68607e-05	95	1830	27	0.0147541	0.284211	GO:0060337	GO:BP	type I interferon signaling pathway	18092
query_1	TRUE	2.68607e-05	95	1830	27	0.0147541	0.284211	GO:0071357	GO:BP	cellular response to type I interferon	18092
query_1	TRUE	2.70866e-05	136	1830	34	0.0185792	0.25	GO:0032543	GO:BP	mitochondrial translation	18092
query_1	TRUE	2.71423e-05	1110	1830	163	0.089071	0.146847	GO:0034622	GO:BP	cellular protein-containing complex assembly	18092
query_1	TRUE	2.97284e-05	439	1830	78	0.042623	0.177677	GO:0045785	GO:BP	positive regulation of cell adhesion	18092
query_1	TRUE	3.40367e-05	310	1830	60	0.0327869	0.193548	GO:0090068	GO:BP	positive regulation of cell cycle process	18092
query_1	TRUE	3.96505e-05	376	1830	69	0.0377049	0.183511	GO:0007159	GO:BP	leukocyte cell-cell adhesion	18092
query_1	TRUE	4.08148e-05	888	1830	135	0.0737705	0.152027	GO:0007017	GO:BP	microtubule-based process	18092
query_1	TRUE	4.3773e-05	1396	1830	196	0.107104	0.140401	GO:0032940	GO:BP	secretion by cell	18092
query_1	TRUE	4.52273e-05	1070	1830	157	0.0857923	0.146729	GO:0002684	GO:BP	positive regulation of immune system process	18092
query_1	TRUE	5.31343e-05	140	1830	34	0.0185792	0.242857	GO:0006414	GO:BP	translational elongation	18092
query_1	TRUE	5.50317e-05	1435	1830	200	0.10929	0.139373	GO:0007010	GO:BP	cytoskeleton organization	18092
query_1	TRUE	5.60442e-05	1538	1830	212	0.115847	0.137841	GO:0046903	GO:BP	secretion	18092
query_1	TRUE	5.81343e-05	6935	1830	796	0.434973	0.11478	GO:0051179	GO:BP	localization	18092
query_1	TRUE	5.98466e-05	166	1830	38	0.020765	0.228916	GO:0140053	GO:BP	mitochondrial gene expression	18092
query_1	TRUE	6.03908e-05	99	1830	27	0.0147541	0.272727	GO:0002474	GO:BP	antigen processing and presentation of peptide antigen via MHC class I	18092
query_1	TRUE	6.27405e-05	105	1830	28	0.0153005	0.266667	GO:0042102	GO:BP	positive regulation of T cell proliferation	18092
query_1	TRUE	6.3223e-05	51	1830	18	0.00983607	0.352941	GO:0090329	GO:BP	regulation of DNA-dependent DNA replication	18092
query_1	TRUE	6.79892e-05	449	1830	78	0.042623	0.173719	GO:0022407	GO:BP	regulation of cell-cell adhesion	18092
query_1	TRUE	6.80207e-05	2428	1830	313	0.171038	0.128913	GO:0050790	GO:BP	regulation of catalytic activity	18092
query_1	TRUE	7.78195e-05	194	1830	42	0.0229508	0.216495	GO:0045333	GO:BP	cellular respiration	18092
query_1	TRUE	8.22169e-05	47	1830	17	0.00928962	0.361702	GO:0007080	GO:BP	mitotic metaphase plate congression	18092
query_1	TRUE	8.694e-05	10057	1830	1111	0.607104	0.11047	GO:0006807	GO:BP	nitrogen compound metabolic process	18092
query_1	TRUE	9.61342e-05	189	1830	41	0.0224044	0.216931	GO:0038061	GO:BP	NIK/NF-kappaB signaling	18092
query_1	TRUE	0.000113428	48	1830	17	0.00928962	0.354167	GO:0046638	GO:BP	positive regulation of alpha-beta T cell differentiation	18092
query_1	TRUE	0.000116332	3459	1830	425	0.23224	0.122868	GO:0010033	GO:BP	response to organic substance	18092
query_1	TRUE	0.000126083	1844	1830	245	0.13388	0.132863	GO:0044093	GO:BP	positive regulation of molecular function	18092
query_1	TRUE	0.000132117	1645	1830	222	0.121311	0.134954	GO:0009607	GO:BP	response to biotic stimulus	18092
query_1	TRUE	0.000143445	219	1830	45	0.0245902	0.205479	GO:0050870	GO:BP	positive regulation of T cell activation	18092
query_1	TRUE	0.000149321	1831	1830	243	0.132787	0.132714	GO:0006952	GO:BP	defense response	18092
query_1	TRUE	0.000149549	128	1830	31	0.0169399	0.242188	GO:0008637	GO:BP	apoptotic mitochondrial changes	18092
query_1	TRUE	0.000158859	35	1830	14	0.00765027	0.4	GO:0071173	GO:BP	spindle assembly checkpoint	18092
query_1	TRUE	0.000158859	35	1830	14	0.00765027	0.4	GO:0031577	GO:BP	spindle checkpoint	18092
query_1	TRUE	0.000158859	35	1830	14	0.00765027	0.4	GO:0008608	GO:BP	attachment of spindle microtubules to kinetochore	18092
query_1	TRUE	0.000158859	35	1830	14	0.00765027	0.4	GO:0071174	GO:BP	mitotic spindle checkpoint	18092
query_1	TRUE	0.000158859	35	1830	14	0.00765027	0.4	GO:0007094	GO:BP	mitotic spindle assembly checkpoint	18092
query_1	TRUE	0.000168698	207	1830	43	0.0234973	0.207729	GO:0042098	GO:BP	T cell proliferation	18092
query_1	TRUE	0.000170289	408	1830	71	0.0387978	0.17402	GO:0045787	GO:BP	positive regulation of cell cycle	18092
query_1	TRUE	0.000174463	752	1830	115	0.0628415	0.152926	GO:0030155	GO:BP	regulation of cell adhesion	18092
query_1	TRUE	0.00017532	76	1830	22	0.0120219	0.289474	GO:0000281	GO:BP	mitotic cytokinesis	18092
query_1	TRUE	0.000177164	1610	1830	217	0.118579	0.134783	GO:0051707	GO:BP	response to other organism	18092
query_1	TRUE	0.00017993	105	1830	27	0.0147541	0.257143	GO:0070498	GO:BP	interleukin-1-mediated signaling pathway	18092
query_1	TRUE	0.000181895	60	1830	19	0.0103825	0.316667	GO:0001836	GO:BP	release of cytochrome c from mitochondria	18092
query_1	TRUE	0.000190258	1612	1830	217	0.118579	0.134615	GO:0043207	GO:BP	response to external biotic stimulus	18092
query_1	TRUE	0.000261177	177	1830	38	0.020765	0.214689	GO:0033209	GO:BP	tumor necrosis factor-mediated signaling pathway	18092
query_1	TRUE	0.000273293	940	1830	137	0.0748634	0.145745	GO:0016032	GO:BP	viral process	18092
query_1	TRUE	0.000276266	67	1830	20	0.010929	0.298507	GO:0090307	GO:BP	mitotic spindle assembly	18092
query_1	TRUE	0.000278345	2969	1830	368	0.201093	0.123947	GO:0065009	GO:BP	regulation of molecular function	18092
query_1	TRUE	0.000285594	16	1830	9	0.00491803	0.5625	GO:1902969	GO:BP	mitotic DNA replication	18092
query_1	TRUE	0.000285594	16	1830	9	0.00491803	0.5625	GO:0006268	GO:BP	DNA unwinding involved in DNA replication	18092
query_1	TRUE	0.000297805	114	1830	28	0.0153005	0.245614	GO:0090175	GO:BP	regulation of establishment of planar polarity	18092
query_1	TRUE	0.000297805	114	1830	28	0.0153005	0.245614	GO:0009141	GO:BP	nucleoside triphosphate metabolic process	18092
query_1	TRUE	0.000298086	7	1830	6	0.00327869	0.857143	GO:0010032	GO:BP	meiotic chromosome condensation	18092
query_1	TRUE	0.000298558	1485	1830	201	0.109836	0.135354	GO:0043085	GO:BP	positive regulation of catalytic activity	18092
query_1	TRUE	0.000310943	28	1830	12	0.00655738	0.428571	GO:0061620	GO:BP	glycolytic process through glucose-6-phosphate	18092
query_1	TRUE	0.00031483	2431	1830	308	0.168306	0.126697	GO:0051128	GO:BP	regulation of cellular component organization	18092
query_1	TRUE	0.00031589	334	1830	60	0.0327869	0.179641	GO:0032984	GO:BP	protein-containing complex disassembly	18092
query_1	TRUE	0.000326098	364	1830	64	0.0349727	0.175824	GO:0009615	GO:BP	response to virus	18092
query_1	TRUE	0.00033034	20	1830	10	0.00546448	0.5	GO:0006123	GO:BP	mitochondrial electron transport, cytochrome c to oxygen	18092
query_1	TRUE	0.00033034	20	1830	10	0.00546448	0.5	GO:0019646	GO:BP	aerobic electron transport chain	18092
query_1	TRUE	0.000354152	103	1830	26	0.0142077	0.252427	GO:0002504	GO:BP	antigen processing and presentation of peptide or polysaccharide antigen via MHC class II	18092
query_1	TRUE	0.000369785	63	1830	19	0.0103825	0.301587	GO:0002260	GO:BP	lymphocyte homeostasis	18092
query_1	TRUE	0.00038563	574	1830	91	0.0497268	0.158537	GO:0022411	GO:BP	cellular component disassembly	18092
query_1	TRUE	0.000385952	122	1830	29	0.015847	0.237705	GO:0032609	GO:BP	interferon-gamma production	18092
query_1	TRUE	0.000411602	110	1830	27	0.0147541	0.245455	GO:0060071	GO:BP	Wnt signaling pathway, planar cell polarity pathway	18092
query_1	TRUE	0.00042854	272	1830	51	0.0278689	0.1875	GO:0072331	GO:BP	signal transduction by p53 class mediator	18092
query_1	TRUE	0.000432703	5	1830	5	0.00273224	1	GO:0042262	GO:BP	DNA protection	18092
query_1	TRUE	0.000444133	48	1830	16	0.00874317	0.333333	GO:0043370	GO:BP	regulation of CD4-positive, alpha-beta T cell differentiation	18092
query_1	TRUE	0.000451447	29	1830	12	0.00655738	0.413793	GO:0061615	GO:BP	glycolytic process through fructose-6-phosphate	18092
query_1	TRUE	0.000477335	339	1830	60	0.0327869	0.176991	GO:1903037	GO:BP	regulation of leukocyte cell-cell adhesion	18092
query_1	TRUE	0.000491115	105	1830	26	0.0142077	0.247619	GO:0061640	GO:BP	cytoskeleton-dependent cytokinesis	18092
query_1	TRUE	0.000498509	17	1830	9	0.00491803	0.529412	GO:0000076	GO:BP	DNA replication checkpoint	18092
query_1	TRUE	0.000501655	143	1830	32	0.0174863	0.223776	GO:0050671	GO:BP	positive regulation of lymphocyte proliferation	18092
query_1	TRUE	0.00051383	8357	1830	931	0.508743	0.111404	GO:0044260	GO:BP	cellular macromolecule metabolic process	18092
query_1	TRUE	0.000516248	996	1830	142	0.0775956	0.14257	GO:0044403	GO:BP	biological process involved in symbiotic interaction	18092
query_1	TRUE	0.0005418	76	1830	21	0.0114754	0.276316	GO:1902036	GO:BP	regulation of hematopoietic stem cell differentiation	18092
query_1	TRUE	0.00054732	232	1830	45	0.0245902	0.193966	GO:0050670	GO:BP	regulation of lymphocyte proliferation	18092
query_1	TRUE	0.000548921	2172	1830	277	0.151366	0.127532	GO:0012501	GO:BP	programmed cell death	18092
query_1	TRUE	0.000556066	177	1830	37	0.0202186	0.20904	GO:0042129	GO:BP	regulation of T cell proliferation	18092
query_1	TRUE	0.000563042	65	1830	19	0.0103825	0.292308	GO:0046637	GO:BP	regulation of alpha-beta T cell differentiation	18092
query_1	TRUE	0.000563497	144	1830	32	0.0174863	0.222222	GO:0032946	GO:BP	positive regulation of mononuclear cell proliferation	18092
query_1	TRUE	0.000570069	88	1830	23	0.0125683	0.261364	GO:0009142	GO:BP	nucleoside triphosphate biosynthetic process	18092
query_1	TRUE	0.000570069	100	1830	25	0.0136612	0.25	GO:0002495	GO:BP	antigen processing and presentation of peptide antigen via MHC class II	18092
query_1	TRUE	0.000595347	151	1830	33	0.0180328	0.218543	GO:0001738	GO:BP	morphogenesis of a polarized epithelium	18092
query_1	TRUE	0.000598486	276	1830	51	0.0278689	0.184783	GO:1901293	GO:BP	nucleoside phosphate biosynthetic process	18092
query_1	TRUE	0.000618297	60	1830	18	0.00983607	0.3	GO:0032663	GO:BP	regulation of interleukin-2 production	18092
query_1	TRUE	0.000624111	3276	1830	398	0.217486	0.12149	GO:0044085	GO:BP	cellular component biogenesis	18092
query_1	TRUE	0.000629667	30	1830	12	0.00655738	0.4	GO:0043372	GO:BP	positive regulation of CD4-positive, alpha-beta T cell differentiation	18092
query_1	TRUE	0.000652177	234	1830	45	0.0245902	0.192308	GO:0032944	GO:BP	regulation of mononuclear cell proliferation	18092
query_1	TRUE	0.000654184	6780	1830	768	0.419672	0.113274	GO:1901564	GO:BP	organonitrogen compound metabolic process	18092
query_1	TRUE	0.000683184	14	1830	8	0.00437158	0.571429	GO:0051988	GO:BP	regulation of attachment of spindle microtubules to kinetochore	18092
query_1	TRUE	0.000683184	66	1830	19	0.0103825	0.287879	GO:0032729	GO:BP	positive regulation of interferon-gamma production	18092
query_1	TRUE	0.000726419	166	1830	35	0.0191257	0.210843	GO:0002819	GO:BP	regulation of adaptive immune response	18092
query_1	TRUE	0.000726419	214	1830	42	0.0229508	0.196262	GO:0002699	GO:BP	positive regulation of immune effector process	18092
query_1	TRUE	0.000756043	452	1830	74	0.0404372	0.163717	GO:0051656	GO:BP	establishment of organelle localization	18092
query_1	TRUE	0.000790745	90	1830	23	0.0125683	0.255556	GO:2001251	GO:BP	negative regulation of chromosome organization	18092
query_1	TRUE	0.000790745	90	1830	23	0.0125683	0.255556	GO:0034502	GO:BP	protein localization to chromosome	18092
query_1	TRUE	0.000790745	272	1830	50	0.0273224	0.183824	GO:0009165	GO:BP	nucleotide biosynthetic process	18092
query_1	TRUE	0.000790745	96	1830	24	0.0131148	0.25	GO:0019886	GO:BP	antigen processing and presentation of exogenous peptide antigen via MHC class II	18092
query_1	TRUE	0.000804194	18	1830	9	0.00491803	0.5	GO:0034501	GO:BP	protein localization to kinetochore	18092
query_1	TRUE	0.000804194	22	1830	10	0.00546448	0.454545	GO:0032069	GO:BP	regulation of nuclease activity	18092
query_1	TRUE	0.000823992	339	1830	59	0.0322404	0.174041	GO:0050863	GO:BP	regulation of T cell activation	18092
query_1	TRUE	0.000864062	8	1830	6	0.00327869	0.75	GO:1902299	GO:BP	pre-replicative complex assembly involved in cell cycle DNA replication	18092
query_1	TRUE	0.000864062	6563	1830	744	0.406557	0.113363	GO:0034641	GO:BP	cellular nitrogen compound metabolic process	18092
query_1	TRUE	0.000864062	8	1830	6	0.00327869	0.75	GO:0036388	GO:BP	pre-replicative complex assembly	18092
query_1	TRUE	0.000864062	109	1830	26	0.0142077	0.238532	GO:0032649	GO:BP	regulation of interferon-gamma production	18092
query_1	TRUE	0.000864062	8	1830	6	0.00327869	0.75	GO:0006267	GO:BP	pre-replicative complex assembly involved in nuclear cell cycle DNA replication	18092
query_1	TRUE	0.000924381	175	1830	36	0.0196721	0.205714	GO:0000910	GO:BP	cytokinesis	18092
query_1	TRUE	0.00104471	57	1830	17	0.00928962	0.298246	GO:0034508	GO:BP	centromere complex assembly	18092
query_1	TRUE	0.00104471	57	1830	17	0.00928962	0.298246	GO:0007062	GO:BP	sister chromatid cohesion	18092
query_1	TRUE	0.00104533	27	1830	11	0.00601093	0.407407	GO:0032201	GO:BP	telomere maintenance via semi-conservative replication	18092
query_1	TRUE	0.00104533	27	1830	11	0.00601093	0.407407	GO:0006735	GO:BP	NADH regeneration	18092
query_1	TRUE	0.00104533	27	1830	11	0.00601093	0.407407	GO:0061718	GO:BP	glucose catabolic process to pyruvate	18092
query_1	TRUE	0.00104533	27	1830	11	0.00601093	0.407407	GO:0061621	GO:BP	canonical glycolysis	18092
query_1	TRUE	0.00109644	298	1830	53	0.0289617	0.177852	GO:0046651	GO:BP	lymphocyte proliferation	18092
query_1	TRUE	0.0011346	52	1830	16	0.00874317	0.307692	GO:0019674	GO:BP	NAD metabolic process	18092
query_1	TRUE	0.00120137	23	1830	10	0.00546448	0.434783	GO:0071459	GO:BP	protein localization to chromosome, centromeric region	18092
query_1	TRUE	0.00120137	23	1830	10	0.00546448	0.434783	GO:0009147	GO:BP	pyrimidine nucleoside triphosphate metabolic process	18092
query_1	TRUE	0.00120137	157	1830	33	0.0180328	0.210191	GO:0070665	GO:BP	positive regulation of leukocyte proliferation	18092
query_1	TRUE	0.00120137	23	1830	10	0.00546448	0.434783	GO:0010499	GO:BP	proteasomal ubiquitin-independent protein catabolic process	18092
query_1	TRUE	0.00122248	1282	1830	173	0.0945355	0.134945	GO:0009628	GO:BP	response to abiotic stimulus	18092
query_1	TRUE	0.00127783	131	1830	29	0.015847	0.221374	GO:0061982	GO:BP	meiosis I cell cycle process	18092
query_1	TRUE	0.0012803	19	1830	9	0.00491803	0.473684	GO:0009148	GO:BP	pyrimidine nucleoside triphosphate biosynthetic process	18092
query_1	TRUE	0.00128164	81	1830	21	0.0114754	0.259259	GO:0043367	GO:BP	CD4-positive, alpha-beta T cell differentiation	18092
query_1	TRUE	0.00129436	151	1830	32	0.0174863	0.211921	GO:0002822	GO:BP	regulation of adaptive immune response based on somatic recombination of immune receptors built from immunoglobulin superfamily domains	18092
query_1	TRUE	0.00132335	112	1830	26	0.0142077	0.232143	GO:0006275	GO:BP	regulation of DNA replication	18092
query_1	TRUE	0.00133858	242	1830	45	0.0245902	0.18595	GO:0006323	GO:BP	DNA packaging	18092
query_1	TRUE	0.00137689	64	1830	18	0.00983607	0.28125	GO:0006521	GO:BP	regulation of cellular amino acid metabolic process	18092
query_1	TRUE	0.00137689	301	1830	53	0.0289617	0.17608	GO:0032943	GO:BP	mononuclear cell proliferation	18092
query_1	TRUE	0.00137689	228	1830	43	0.0234973	0.188596	GO:0050792	GO:BP	regulation of viral process	18092
query_1	TRUE	0.00141046	1046	1830	145	0.079235	0.138623	GO:0051338	GO:BP	regulation of transferase activity	18092
query_1	TRUE	0.00142992	132	1830	29	0.015847	0.219697	GO:0007098	GO:BP	centrosome cycle	18092
query_1	TRUE	0.00146898	550	1830	85	0.0464481	0.154545	GO:0006753	GO:BP	nucleoside phosphate metabolic process	18092
query_1	TRUE	0.00148902	76	1830	20	0.010929	0.263158	GO:0072395	GO:BP	signal transduction involved in cell cycle checkpoint	18092
query_1	TRUE	0.00151051	48	1830	15	0.00819672	0.3125	GO:0045005	GO:BP	DNA-dependent DNA replication maintenance of fidelity	18092
query_1	TRUE	0.00151051	280	1830	50	0.0273224	0.178571	GO:0033044	GO:BP	regulation of chromosome organization	18092
query_1	TRUE	0.00151893	495	1830	78	0.042623	0.157576	GO:0042110	GO:BP	T cell activation	18092
query_1	TRUE	0.00155273	208	1830	40	0.0218579	0.192308	GO:0002703	GO:BP	regulation of leukocyte mediated immunity	18092
query_1	TRUE	0.00155288	11998	1830	1288	0.703825	0.107351	GO:0008152	GO:BP	metabolic process	18092
query_1	TRUE	0.00157274	998	1830	139	0.0759563	0.139279	GO:0050776	GO:BP	regulation of immune response	18092
query_1	TRUE	0.00162219	698	1830	103	0.0562842	0.147564	GO:0044283	GO:BP	small molecule biosynthetic process	18092
query_1	TRUE	0.00170351	95	1830	23	0.0125683	0.242105	GO:0045132	GO:BP	meiotic chromosome segregation	18092
query_1	TRUE	0.00174615	89	1830	22	0.0120219	0.247191	GO:0001776	GO:BP	leukocyte homeostasis	18092
query_1	TRUE	0.00175173	6	1830	5	0.00273224	0.833333	GO:0000912	GO:BP	assembly of actomyosin apparatus involved in cytokinesis	18092
query_1	TRUE	0.00175173	6	1830	5	0.00273224	0.833333	GO:0000915	GO:BP	actomyosin contractile ring assembly	18092
query_1	TRUE	0.00175173	238	1830	44	0.0240437	0.184874	GO:0043903	GO:BP	regulation of biological process involved in symbiotic interaction	18092
query_1	TRUE	0.00179548	154	1830	32	0.0174863	0.207792	GO:0000077	GO:BP	DNA damage checkpoint	18092
query_1	TRUE	0.00181232	783	1830	113	0.0617486	0.144317	GO:0046649	GO:BP	lymphocyte activation	18092
query_1	TRUE	0.00181614	253	1830	46	0.0251366	0.181818	GO:0070663	GO:BP	regulation of leukocyte proliferation	18092
query_1	TRUE	0.00188402	49	1830	15	0.00819672	0.306122	GO:0090199	GO:BP	regulation of release of cytochrome c from mitochondria	18092
query_1	TRUE	0.00190476	328	1830	56	0.0306011	0.170732	GO:0070661	GO:BP	leukocyte proliferation	18092
query_1	TRUE	0.00194782	16	1830	8	0.00437158	0.5	GO:0009200	GO:BP	deoxyribonucleoside triphosphate metabolic process	18092
query_1	TRUE	0.00194782	16	1830	8	0.00437158	0.5	GO:0007076	GO:BP	mitotic chromosome condensation	18092
query_1	TRUE	0.00195694	3030	1830	366	0.2	0.120792	GO:0022607	GO:BP	cellular component assembly	18092
query_1	TRUE	0.00197547	291	1830	51	0.0278689	0.175258	GO:0015980	GO:BP	energy derivation by oxidation of organic compounds	18092
query_1	TRUE	0.00198174	9	1830	6	0.00327869	0.666667	GO:1900264	GO:BP	positive regulation of DNA-directed DNA polymerase activity	18092
query_1	TRUE	0.00198174	9	1830	6	0.00327869	0.666667	GO:1900262	GO:BP	regulation of DNA-directed DNA polymerase activity	18092
query_1	TRUE	0.00198174	9	1830	6	0.00327869	0.666667	GO:0046602	GO:BP	regulation of mitotic centrosome separation	18092
query_1	TRUE	0.00198615	90	1830	22	0.0120219	0.244444	GO:0060218	GO:BP	hematopoietic stem cell differentiation	18092
query_1	TRUE	0.00199383	10575	1830	1146	0.62623	0.108369	GO:0044238	GO:BP	primary metabolic process	18092
query_1	TRUE	0.00203282	375	1830	62	0.0338798	0.165333	GO:0045862	GO:BP	positive regulation of proteolysis	18092
query_1	TRUE	0.00205545	183	1830	36	0.0196721	0.196721	GO:0045619	GO:BP	regulation of lymphocyte differentiation	18092
query_1	TRUE	0.00206157	34	1830	12	0.00655738	0.352941	GO:0045589	GO:BP	regulation of regulatory T cell differentiation	18092
query_1	TRUE	0.00206157	39	1830	13	0.00710383	0.333333	GO:0031297	GO:BP	replication fork processing	18092
query_1	TRUE	0.00206157	34	1830	12	0.00655738	0.352941	GO:0009262	GO:BP	deoxyribonucleotide metabolic process	18092
query_1	TRUE	0.00214372	129	1830	28	0.0153005	0.217054	GO:0001736	GO:BP	establishment of planar polarity	18092
query_1	TRUE	0.00214372	129	1830	28	0.0153005	0.217054	GO:0007164	GO:BP	establishment of tissue polarity	18092
query_1	TRUE	0.0021526	5863	1830	666	0.363934	0.113594	GO:0048522	GO:BP	positive regulation of cellular process	18092
query_1	TRUE	0.00216692	300	1830	52	0.0284153	0.173333	GO:0097193	GO:BP	intrinsic apoptotic signaling pathway	18092
query_1	TRUE	0.00219633	542	1830	83	0.0453552	0.153137	GO:0009117	GO:BP	nucleotide metabolic process	18092
query_1	TRUE	0.0022287	136	1830	29	0.015847	0.213235	GO:0006165	GO:BP	nucleoside diphosphate phosphorylation	18092
query_1	TRUE	0.00234514	85	1830	21	0.0114754	0.247059	GO:0033238	GO:BP	regulation of cellular amine metabolic process	18092
query_1	TRUE	0.00246284	666	1830	98	0.0535519	0.147147	GO:0050865	GO:BP	regulation of cell activation	18092
query_1	TRUE	0.00253494	137	1830	29	0.015847	0.211679	GO:0046939	GO:BP	nucleotide phosphorylation	18092
query_1	TRUE	0.0026049	371	1830	61	0.0333333	0.16442	GO:0051052	GO:BP	regulation of DNA metabolic process	18092
query_1	TRUE	0.00264068	214	1830	40	0.0218579	0.186916	GO:0071456	GO:BP	cellular response to hypoxia	18092
query_1	TRUE	0.00264068	111	1830	25	0.0136612	0.225225	GO:0044774	GO:BP	mitotic DNA integrity checkpoint	18092
query_1	TRUE	0.00264671	30	1830	11	0.00601093	0.366667	GO:0009394	GO:BP	2'-deoxyribonucleotide metabolic process	18092
query_1	TRUE	0.00264671	92	1830	22	0.0120219	0.23913	GO:0045582	GO:BP	positive regulation of T cell differentiation	18092
query_1	TRUE	0.00264671	40	1830	13	0.00710383	0.325	GO:0043029	GO:BP	T cell homeostasis	18092
query_1	TRUE	0.00273207	2322	1830	287	0.156831	0.1236	GO:0008219	GO:BP	cell death	18092
query_1	TRUE	0.00281924	4	1830	4	0.00218579	1	GO:0007057	GO:BP	spindle assembly involved in female meiosis I	18092
query_1	TRUE	0.00283243	281	1830	49	0.026776	0.174377	GO:0006839	GO:BP	mitochondrial transport	18092
query_1	TRUE	0.00297496	201	1830	38	0.020765	0.189055	GO:0043487	GO:BP	regulation of RNA stability	18092
query_1	TRUE	0.00306098	173	1830	34	0.0185792	0.196532	GO:0051302	GO:BP	regulation of cell division	18092
query_1	TRUE	0.00308481	93	1830	22	0.0120219	0.236559	GO:1903557	GO:BP	positive regulation of tumor necrosis factor superfamily cytokine production	18092
query_1	TRUE	0.00313467	46	1830	14	0.00765027	0.304348	GO:0006734	GO:BP	NADH metabolic process	18092
query_1	TRUE	0.00313467	46	1830	14	0.00765027	0.304348	GO:0006220	GO:BP	pyrimidine nucleotide metabolic process	18092
query_1	TRUE	0.00315301	17165	1830	1768	0.96612	0.103	GO:0009987	GO:BP	cellular process	18092
query_1	TRUE	0.00318488	106	1830	24	0.0131148	0.226415	GO:0045621	GO:BP	positive regulation of lymphocyte differentiation	18092
query_1	TRUE	0.00328151	2193	1830	272	0.148634	0.124031	GO:0016192	GO:BP	vesicle-mediated transport	18092
query_1	TRUE	0.00330045	75	1830	19	0.0103825	0.253333	GO:0072401	GO:BP	signal transduction involved in DNA integrity checkpoint	18092
query_1	TRUE	0.00330045	75	1830	19	0.0103825	0.253333	GO:0072422	GO:BP	signal transduction involved in DNA damage checkpoint	18092
query_1	TRUE	0.00331171	126	1830	27	0.0147541	0.214286	GO:0007127	GO:BP	meiosis I	18092
query_1	TRUE	0.00336251	41	1830	13	0.00710383	0.317073	GO:0072528	GO:BP	pyrimidine-containing compound biosynthetic process	18092
query_1	TRUE	0.00353022	36	1830	12	0.00655738	0.333333	GO:2000516	GO:BP	positive regulation of CD4-positive, alpha-beta T cell activation	18092
query_1	TRUE	0.00353022	36	1830	12	0.00655738	0.333333	GO:0006007	GO:BP	glucose catabolic process	18092
query_1	TRUE	0.00369954	88	1830	21	0.0114754	0.238636	GO:0032465	GO:BP	regulation of cytokinesis	18092
query_1	TRUE	0.0038665	101	1830	23	0.0125683	0.227723	GO:0035710	GO:BP	CD4-positive, alpha-beta T cell activation	18092
query_1	TRUE	0.0038665	64	1830	17	0.00928962	0.265625	GO:0046635	GO:BP	positive regulation of alpha-beta T cell activation	18092
query_1	TRUE	0.0038665	64	1830	17	0.00928962	0.265625	GO:2000514	GO:BP	regulation of CD4-positive, alpha-beta T cell activation	18092
query_1	TRUE	0.0038716	47	1830	14	0.00765027	0.297872	GO:1901028	GO:BP	regulation of mitochondrial outer membrane permeabilization involved in apoptotic signaling pathway	18092
query_1	TRUE	0.0038716	47	1830	14	0.00765027	0.297872	GO:0031055	GO:BP	chromatin remodeling at centromere	18092
query_1	TRUE	0.0038716	47	1830	14	0.00765027	0.297872	GO:0030261	GO:BP	chromosome condensation	18092
query_1	TRUE	0.00393571	10	1830	6	0.00327869	0.6	GO:0044771	GO:BP	meiotic cell cycle phase transition	18092
query_1	TRUE	0.00403924	241	1830	43	0.0234973	0.178423	GO:0071453	GO:BP	cellular response to oxygen levels	18092
query_1	TRUE	0.00403924	183	1830	35	0.0191257	0.191257	GO:0002244	GO:BP	hematopoietic progenitor cell differentiation	18092
query_1	TRUE	0.00403924	95	1830	22	0.0120219	0.231579	GO:0002824	GO:BP	positive regulation of adaptive immune response based on somatic recombination of immune receptors built from immunoglobulin superfamily domains	18092
query_1	TRUE	0.00420163	363	1830	59	0.0322404	0.162534	GO:0010639	GO:BP	negative regulation of organelle organization	18092
query_1	TRUE	0.0042308	53	1830	15	0.00819672	0.283019	GO:0006336	GO:BP	DNA replication-independent nucleosome assembly	18092
query_1	TRUE	0.0042308	89	1830	21	0.0114754	0.235955	GO:1901532	GO:BP	regulation of hematopoietic progenitor cell differentiation	18092
query_1	TRUE	0.00424964	620	1830	91	0.0497268	0.146774	GO:0097190	GO:BP	apoptotic signaling pathway	18092
query_1	TRUE	0.00450364	77	1830	19	0.0103825	0.246753	GO:0009201	GO:BP	ribonucleoside triphosphate biosynthetic process	18092
query_1	TRUE	0.00450364	27	1830	10	0.00546448	0.37037	GO:0002825	GO:BP	regulation of T-helper 1 type immune response	18092
query_1	TRUE	0.00450364	427	1830	67	0.036612	0.156909	GO:0050867	GO:BP	positive regulation of cell activation	18092
query_1	TRUE	0.00450364	37	1830	12	0.00655738	0.324324	GO:0045066	GO:BP	regulatory T cell differentiation	18092
query_1	TRUE	0.00452766	7	1830	5	0.00273224	0.714286	GO:0044837	GO:BP	actomyosin contractile ring organization	18092
query_1	TRUE	0.00452766	7	1830	5	0.00273224	0.714286	GO:0043376	GO:BP	regulation of CD8-positive, alpha-beta T cell differentiation	18092
query_1	TRUE	0.00452766	18	1830	8	0.00437158	0.444444	GO:0051382	GO:BP	kinetochore assembly	18092
query_1	TRUE	0.00455815	5225	1830	595	0.325137	0.113876	GO:0044267	GO:BP	cellular protein metabolic process	18092
query_1	TRUE	0.00458877	32	1830	11	0.00601093	0.34375	GO:0019692	GO:BP	deoxyribose phosphate metabolic process	18092
query_1	TRUE	0.00465595	14	1830	7	0.00382514	0.5	GO:0007100	GO:BP	mitotic centrosome separation	18092
query_1	TRUE	0.00465595	14	1830	7	0.00382514	0.5	GO:0090594	GO:BP	inflammatory response to wounding	18092
query_1	TRUE	0.0047312	136	1830	28	0.0153005	0.205882	GO:0006282	GO:BP	regulation of DNA repair	18092
query_1	TRUE	0.0047312	2018	1830	251	0.137158	0.124381	GO:0006915	GO:BP	apoptotic process	18092
query_1	TRUE	0.00481335	143	1830	29	0.015847	0.202797	GO:0031023	GO:BP	microtubule organizing center organization	18092
query_1	TRUE	0.00489385	157	1830	31	0.0169399	0.197452	GO:0009132	GO:BP	nucleoside diphosphate metabolic process	18092
query_1	TRUE	0.0049291	1625	1830	207	0.113115	0.127385	GO:0002682	GO:BP	regulation of immune system process	18092
query_1	TRUE	0.00499943	690	1830	99	0.0540984	0.143478	GO:1901137	GO:BP	carbohydrate derivative biosynthetic process	18092
query_1	TRUE	0.00500162	632	1830	92	0.0502732	0.14557	GO:0055086	GO:BP	nucleobase-containing small molecule metabolic process	18092
query_1	TRUE	0.00502647	54	1830	15	0.00819672	0.277778	GO:0034724	GO:BP	DNA replication-independent nucleosome organization	18092
query_1	TRUE	0.00515223	43	1830	13	0.00710383	0.302326	GO:0034080	GO:BP	CENP-A containing nucleosome assembly	18092
query_1	TRUE	0.00515223	110	1830	24	0.0131148	0.218182	GO:0046632	GO:BP	alpha-beta T cell differentiation	18092
query_1	TRUE	0.00515223	78	1830	19	0.0103825	0.24359	GO:0061418	GO:BP	regulation of transcription from RNA polymerase II promoter in response to hypoxia	18092
query_1	TRUE	0.00515223	43	1830	13	0.00710383	0.302326	GO:0061641	GO:BP	CENP-A containing chromatin organization	18092
query_1	TRUE	0.00515223	78	1830	19	0.0103825	0.24359	GO:0070227	GO:BP	lymphocyte apoptotic process	18092
query_1	TRUE	0.00516907	186	1830	35	0.0191257	0.188172	GO:0071347	GO:BP	cellular response to interleukin-1	18092
query_1	TRUE	0.00531535	1477	1830	190	0.103825	0.128639	GO:0009057	GO:BP	macromolecule catabolic process	18092
query_1	TRUE	0.00532464	151	1830	30	0.0163934	0.198675	GO:0035567	GO:BP	non-canonical Wnt signaling pathway	18092
query_1	TRUE	0.00536149	117	1830	25	0.0136612	0.213675	GO:0043620	GO:BP	regulation of DNA-templated transcription in response to stress	18092
query_1	TRUE	0.00544243	91	1830	21	0.0114754	0.230769	GO:1901992	GO:BP	positive regulation of mitotic cell cycle phase transition	18092
query_1	TRUE	0.00580903	2812	1830	337	0.184153	0.119844	GO:0071310	GO:BP	cellular response to organic substance	18092
query_1	TRUE	0.00583036	111	1830	24	0.0131148	0.216216	GO:0002286	GO:BP	T cell activation involved in immune response	18092
query_1	TRUE	0.00591059	28	1830	10	0.00546448	0.357143	GO:0090200	GO:BP	positive regulation of release of cytochrome c from mitochondria	18092
query_1	TRUE	0.00597246	224	1830	40	0.0218579	0.178571	GO:0036294	GO:BP	cellular response to decreased oxygen levels	18092
query_1	TRUE	0.00600263	753	1830	106	0.0579235	0.14077	GO:0050778	GO:BP	positive regulation of immune response	18092
query_1	TRUE	0.00600846	55	1830	15	0.00819672	0.272727	GO:0070231	GO:BP	T cell apoptotic process	18092
query_1	TRUE	0.00600846	269	1830	46	0.0251366	0.171004	GO:0051607	GO:BP	defense response to virus	18092
query_1	TRUE	0.00600846	269	1830	46	0.0251366	0.171004	GO:0140546	GO:BP	defense response to symbiont	18092
query_1	TRUE	0.00605644	821	1830	114	0.0622951	0.138855	GO:0045859	GO:BP	regulation of protein kinase activity	18092
query_1	TRUE	0.00605644	1455	1830	187	0.102186	0.128522	GO:0080134	GO:BP	regulation of response to stress	18092
query_1	TRUE	0.0061454	441	1830	68	0.0371585	0.154195	GO:0001819	GO:BP	positive regulation of cytokine production	18092
query_1	TRUE	0.00618874	6466	1830	722	0.394536	0.111661	GO:0048518	GO:BP	positive regulation of biological process	18092
query_1	TRUE	0.00618874	92	1830	21	0.0114754	0.228261	GO:0009199	GO:BP	ribonucleoside triphosphate metabolic process	18092
query_1	TRUE	0.00618874	362	1830	58	0.031694	0.160221	GO:0043687	GO:BP	post-translational protein modification	18092
query_1	TRUE	0.00631831	44	1830	13	0.00710383	0.295455	GO:0042088	GO:BP	T-helper 1 type immune response	18092
query_1	TRUE	0.00633951	621	1830	90	0.0491803	0.144928	GO:0002694	GO:BP	regulation of leukocyte activation	18092
query_1	TRUE	0.00642912	146	1830	29	0.015847	0.19863	GO:0070507	GO:BP	regulation of microtubule cytoskeleton organization	18092
query_1	TRUE	0.00655257	196	1830	36	0.0196721	0.183673	GO:0071897	GO:BP	DNA biosynthetic process	18092
query_1	TRUE	0.00657566	363	1830	58	0.031694	0.15978	GO:0051169	GO:BP	nuclear transport	18092
query_1	TRUE	0.00660981	6267	1830	701	0.38306	0.111856	GO:1901576	GO:BP	organic substance biosynthetic process	18092
query_1	TRUE	0.00676917	340	1830	55	0.0300546	0.161765	GO:0006520	GO:BP	cellular amino acid metabolic process	18092
query_1	TRUE	0.00681146	50	1830	14	0.00765027	0.28	GO:0010569	GO:BP	regulation of double-strand break repair via homologous recombination	18092
query_1	TRUE	0.00681146	50	1830	14	0.00765027	0.28	GO:0070671	GO:BP	response to interleukin-12	18092
query_1	TRUE	0.0068167	901	1830	123	0.0672131	0.136515	GO:0098609	GO:BP	cell-cell adhesion	18092
query_1	TRUE	0.0068167	524	1830	78	0.042623	0.148855	GO:0051249	GO:BP	regulation of lymphocyte activation	18092
query_1	TRUE	0.00688429	39	1830	12	0.00655738	0.307692	GO:0009163	GO:BP	nucleoside biosynthetic process	18092
query_1	TRUE	0.00688429	39	1830	12	0.00655738	0.307692	GO:0032506	GO:BP	cytokinetic process	18092
query_1	TRUE	0.00701674	161	1830	31	0.0169399	0.192547	GO:0051250	GO:BP	negative regulation of lymphocyte activation	18092
query_1	TRUE	0.00703528	5924	1830	665	0.363388	0.112255	GO:0046483	GO:BP	heterocycle metabolic process	18092
query_1	TRUE	0.00703528	15	1830	7	0.00382514	0.466667	GO:0051299	GO:BP	centrosome separation	18092
query_1	TRUE	0.00703528	15	1830	7	0.00382514	0.466667	GO:0023035	GO:BP	CD40 signaling pathway	18092
query_1	TRUE	0.00703528	56	1830	15	0.00819672	0.267857	GO:0006120	GO:BP	mitochondrial electron transport, NADH to ubiquinone	18092
query_1	TRUE	0.00709929	436	1830	67	0.036612	0.15367	GO:0019693	GO:BP	ribose phosphate metabolic process	18092
query_1	TRUE	0.00717008	4245	1830	489	0.267213	0.115194	GO:0043412	GO:BP	macromolecule modification	18092
query_1	TRUE	0.0073048	24	1830	9	0.00491803	0.375	GO:0032753	GO:BP	positive regulation of interleukin-4 production	18092
query_1	TRUE	0.00731998	34	1830	11	0.00601093	0.323529	GO:0042908	GO:BP	xenobiotic transport	18092
query_1	TRUE	0.00736663	100	1830	22	0.0120219	0.22	GO:0002821	GO:BP	positive regulation of adaptive immune response	18092
query_1	TRUE	0.00754574	29	1830	10	0.00546448	0.344828	GO:0033561	GO:BP	regulation of water loss via skin	18092
query_1	TRUE	0.00755249	169	1830	32	0.0174863	0.189349	GO:0010821	GO:BP	regulation of mitochondrion organization	18092
query_1	TRUE	0.00771182	81	1830	19	0.0103825	0.234568	GO:0006353	GO:BP	DNA-templated transcription, termination	18092
query_1	TRUE	0.00812892	495	1830	74	0.0404372	0.149495	GO:0010498	GO:BP	proteasomal protein catabolic process	18092
query_1	TRUE	0.0083613	170	1830	32	0.0174863	0.188235	GO:1903555	GO:BP	regulation of tumor necrosis factor superfamily cytokine production	18092
query_1	TRUE	0.00841931	57	1830	15	0.00819672	0.263158	GO:0036297	GO:BP	interstrand cross-link repair	18092
query_1	TRUE	0.00843056	63	1830	16	0.00874317	0.253968	GO:0032613	GO:BP	interleukin-10 production	18092
query_1	TRUE	0.00843056	88	1830	20	0.010929	0.227273	GO:0060333	GO:BP	interferon-gamma-mediated signaling pathway	18092
query_1	TRUE	0.00851548	40	1830	12	0.00655738	0.3	GO:0042092	GO:BP	type 2 immune response	18092
query_1	TRUE	0.00851548	305	1830	50	0.0273224	0.163934	GO:0071356	GO:BP	cellular response to tumor necrosis factor	18092
query_1	TRUE	0.00851548	192	1830	35	0.0191257	0.182292	GO:0043488	GO:BP	regulation of mRNA stability	18092
query_1	TRUE	0.00873786	108	1830	23	0.0125683	0.212963	GO:0000018	GO:BP	regulation of DNA recombination	18092
query_1	TRUE	0.00892584	3438	1830	402	0.219672	0.116928	GO:0070887	GO:BP	cellular response to chemical stimulus	18092
query_1	TRUE	0.00897499	538	1830	79	0.0431694	0.14684	GO:0051493	GO:BP	regulation of cytoskeleton organization	18092
query_1	TRUE	0.00897499	95	1830	21	0.0114754	0.221053	GO:0031146	GO:BP	SCF-dependent proteasomal ubiquitin-dependent protein catabolic process	18092
query_1	TRUE	0.00918877	215	1830	38	0.020765	0.176744	GO:0070555	GO:BP	response to interleukin-1	18092
query_1	TRUE	0.00918877	8	1830	5	0.00273224	0.625	GO:0051256	GO:BP	mitotic spindle midzone assembly	18092
query_1	TRUE	0.00942365	150	1830	29	0.015847	0.193333	GO:0010212	GO:BP	response to ionizing radiation	18092
query_1	TRUE	0.00944429	89	1830	20	0.010929	0.224719	GO:2000779	GO:BP	regulation of double-strand break repair	18092
query_1	TRUE	0.00944429	5	1830	4	0.00218579	0.8	GO:0008315	GO:BP	G2/MI transition of meiotic cell cycle	18092
query_1	TRUE	0.00944429	5	1830	4	0.00218579	0.8	GO:0009082	GO:BP	branched-chain amino acid biosynthetic process	18092
query_1	TRUE	0.00944429	5	1830	4	0.00218579	0.8	GO:0033091	GO:BP	positive regulation of immature T cell proliferation	18092
query_1	TRUE	0.00944429	5	1830	4	0.00218579	0.8	GO:0032077	GO:BP	positive regulation of deoxyribonuclease activity	18092
query_1	TRUE	0.00944429	89	1830	20	0.010929	0.224719	GO:0002718	GO:BP	regulation of cytokine production involved in immune response	18092
query_1	TRUE	0.00944429	5	1830	4	0.00218579	0.8	GO:0106014	GO:BP	regulation of inflammatory response to wounding	18092
query_1	TRUE	0.00944429	1929	1830	238	0.130055	0.12338	GO:0044281	GO:BP	small molecule metabolic process	18092
query_1	TRUE	0.00944429	5	1830	4	0.00218579	0.8	GO:0015990	GO:BP	electron transport coupled proton transport	18092
query_1	TRUE	0.00944429	5	1830	4	0.00218579	0.8	GO:0015988	GO:BP	energy coupled proton transmembrane transport, against electrochemical gradient	18092
query_1	TRUE	0.00944429	5	1830	4	0.00218579	0.8	GO:0043378	GO:BP	positive regulation of CD8-positive, alpha-beta T cell differentiation	18092
query_1	TRUE	0.00951643	808	1830	111	0.0606557	0.137376	GO:0006954	GO:BP	inflammatory response	18092
query_1	TRUE	0.00960063	201	1830	36	0.0196721	0.179104	GO:0034341	GO:BP	response to interferon-gamma	18092
query_1	TRUE	0.00960063	109	1830	23	0.0125683	0.211009	GO:1901989	GO:BP	positive regulation of cell cycle phase transition	18092
query_1	TRUE	0.00961341	25	1830	9	0.00491803	0.36	GO:0061436	GO:BP	establishment of skin barrier	18092
query_1	TRUE	0.00962219	64	1830	16	0.00874317	0.25	GO:0002294	GO:BP	CD4-positive, alpha-beta T cell differentiation involved in immune response	18092
query_1	TRUE	0.00966819	58	1830	15	0.00819672	0.258621	GO:0097345	GO:BP	mitochondrial outer membrane permeabilization	18092
query_1	TRUE	0.00992075	96	1830	21	0.0114754	0.21875	GO:0032755	GO:BP	positive regulation of interleukin-6 production	18092
query_1	TRUE	0.00992075	96	1830	21	0.0114754	0.21875	GO:0090559	GO:BP	regulation of membrane permeability	18092
query_1	TRUE	0.0101942	137	1830	27	0.0147541	0.19708	GO:0042770	GO:BP	signal transduction in response to DNA damage	18092
query_1	TRUE	0.0103032	5766	1830	646	0.353005	0.112036	GO:0006139	GO:BP	nucleobase-containing compound metabolic process	18092
query_1	TRUE	0.0103294	16	1830	7	0.00382514	0.4375	GO:0046134	GO:BP	pyrimidine nucleoside biosynthetic process	18092
query_1	TRUE	0.0105183	2271	1830	275	0.150273	0.121092	GO:1901575	GO:BP	organic substance catabolic process	18092
query_1	TRUE	0.0105458	509	1830	75	0.0409836	0.147348	GO:0032103	GO:BP	positive regulation of response to external stimulus	18092
query_1	TRUE	0.0106416	90	1830	20	0.010929	0.222222	GO:0032760	GO:BP	positive regulation of tumor necrosis factor production	18092
query_1	TRUE	0.0107202	110	1830	23	0.0125683	0.209091	GO:0002367	GO:BP	cytokine production involved in immune response	18092
query_1	TRUE	0.0107708	166	1830	31	0.0169399	0.186747	GO:1903900	GO:BP	regulation of viral life cycle	18092
query_1	TRUE	0.0108231	1854	1830	229	0.125137	0.123517	GO:1901566	GO:BP	organonitrogen compound biosynthetic process	18092
query_1	TRUE	0.0108231	71	1830	17	0.00928962	0.239437	GO:0009123	GO:BP	nucleoside monophosphate metabolic process	18092
query_1	TRUE	0.0108231	676	1830	95	0.0519126	0.140533	GO:0051640	GO:BP	organelle localization	18092
query_1	TRUE	0.0108231	12	1830	6	0.00327869	0.5	GO:0051255	GO:BP	spindle midzone assembly	18092
query_1	TRUE	0.0109183	47	1830	13	0.00710383	0.276596	GO:0035722	GO:BP	interleukin-12-mediated signaling pathway	18092
query_1	TRUE	0.0109679	601	1830	86	0.0469945	0.143095	GO:0046700	GO:BP	heterocycle catabolic process	18092
query_1	TRUE	0.0109817	152	1830	29	0.015847	0.190789	GO:0045580	GO:BP	regulation of T cell differentiation	18092
query_1	TRUE	0.0111057	437	1830	66	0.0360656	0.15103	GO:1903131	GO:BP	mononuclear cell differentiation	18092
query_1	TRUE	0.0111057	65	1830	16	0.00874317	0.246154	GO:0002293	GO:BP	alpha-beta T cell differentiation involved in immune response	18092
query_1	TRUE	0.0111057	65	1830	16	0.00874317	0.246154	GO:0002287	GO:BP	alpha-beta T cell activation involved in immune response	18092
query_1	TRUE	0.0112066	36	1830	11	0.00601093	0.305556	GO:0045622	GO:BP	regulation of T-helper cell differentiation	18092
query_1	TRUE	0.0112066	36	1830	11	0.00601093	0.305556	GO:0045730	GO:BP	respiratory burst	18092
query_1	TRUE	0.0112162	59	1830	15	0.00819672	0.254237	GO:0051653	GO:BP	spindle localization	18092
query_1	TRUE	0.0113414	174	1830	32	0.0174863	0.183908	GO:0032675	GO:BP	regulation of interleukin-6 production	18092
query_1	TRUE	0.0113727	4027	1830	463	0.253005	0.114974	GO:0006464	GO:BP	cellular protein modification process	18092
query_1	TRUE	0.0113727	4027	1830	463	0.253005	0.114974	GO:0036211	GO:BP	protein modification process	18092
query_1	TRUE	0.0113931	104	1830	22	0.0120219	0.211538	GO:0002456	GO:BP	T cell mediated immunity	18092
query_1	TRUE	0.0113931	104	1830	22	0.0120219	0.211538	GO:0044773	GO:BP	mitotic DNA damage checkpoint	18092
query_1	TRUE	0.0116915	111	1830	23	0.0125683	0.207207	GO:0043618	GO:BP	regulation of transcription from RNA polymerase II promoter in response to stress	18092
query_1	TRUE	0.0116915	111	1830	23	0.0125683	0.207207	GO:0030330	GO:BP	DNA damage response, signal transduction by p53 class mediator	18092
query_1	TRUE	0.0116915	160	1830	30	0.0163934	0.1875	GO:1903708	GO:BP	positive regulation of hemopoiesis	18092
query_1	TRUE	0.0116915	160	1830	30	0.0163934	0.1875	GO:1902107	GO:BP	positive regulation of leukocyte differentiation	18092
query_1	TRUE	0.0117207	303	1830	49	0.026776	0.161716	GO:0045088	GO:BP	regulation of innate immune response	18092
query_1	TRUE	0.0117227	91	1830	20	0.010929	0.21978	GO:0009144	GO:BP	purine nucleoside triphosphate metabolic process	18092
query_1	TRUE	0.0117784	234	1830	40	0.0218579	0.17094	GO:2001020	GO:BP	regulation of response to DNA damage stimulus	18092
query_1	TRUE	0.0117784	234	1830	40	0.0218579	0.17094	GO:0030595	GO:BP	leukocyte chemotaxis	18092
query_1	TRUE	0.0118667	31	1830	10	0.00546448	0.322581	GO:0032673	GO:BP	regulation of interleukin-4 production	18092
query_1	TRUE	0.0118667	31	1830	10	0.00546448	0.322581	GO:0006221	GO:BP	pyrimidine nucleotide biosynthetic process	18092
query_1	TRUE	0.0121886	175	1830	32	0.0174863	0.182857	GO:0071706	GO:BP	tumor necrosis factor superfamily cytokine production	18092
query_1	TRUE	0.0121948	72	1830	17	0.00928962	0.236111	GO:0070192	GO:BP	chromosome organization involved in meiotic cell cycle	18092
query_1	TRUE	0.0121974	604	1830	86	0.0469945	0.142384	GO:0090407	GO:BP	organophosphate biosynthetic process	18092
query_1	TRUE	0.0121988	227	1830	39	0.0213115	0.171806	GO:0007163	GO:BP	establishment or maintenance of cell polarity	18092
query_1	TRUE	0.0121988	415	1830	63	0.0344262	0.151807	GO:0002696	GO:BP	positive regulation of leukocyte activation	18092
query_1	TRUE	0.0123994	273	1830	45	0.0245902	0.164835	GO:0042180	GO:BP	cellular ketone metabolic process	18092
query_1	TRUE	0.0124402	85	1830	19	0.0103825	0.223529	GO:0072527	GO:BP	pyrimidine-containing compound metabolic process	18092
query_1	TRUE	0.0124814	456	1830	68	0.0371585	0.149123	GO:0062012	GO:BP	regulation of small molecule metabolic process	18092
query_1	TRUE	0.01257	281	1830	46	0.0251366	0.163701	GO:0005996	GO:BP	monosaccharide metabolic process	18092
query_1	TRUE	0.01257	66	1830	16	0.00874317	0.242424	GO:1902686	GO:BP	mitochondrial outer membrane permeabilization involved in programmed cell death	18092
query_1	TRUE	0.0128004	6362	1830	706	0.385792	0.110971	GO:0009058	GO:BP	biosynthetic process	18092
query_1	TRUE	0.0129072	243	1830	41	0.0224044	0.168724	GO:0002833	GO:BP	positive regulation of response to biotic stimulus	18092
query_1	TRUE	0.0129072	360	1830	56	0.0306011	0.155556	GO:0006913	GO:BP	nucleocytoplasmic transport	18092
query_1	TRUE	0.0131577	5977	1830	666	0.363934	0.111427	GO:0006725	GO:BP	cellular aromatic compound metabolic process	18092
query_1	TRUE	0.0132103	606	1830	86	0.0469945	0.141914	GO:0044270	GO:BP	cellular nitrogen compound catabolic process	18092
query_1	TRUE	0.0134732	329	1830	52	0.0284153	0.158055	GO:0034612	GO:BP	response to tumor necrosis factor	18092
query_1	TRUE	0.0135891	37	1830	11	0.00601093	0.297297	GO:1901030	GO:BP	positive regulation of mitochondrial outer membrane permeabilization involved in apoptotic signaling pathway	18092
query_1	TRUE	0.0136061	206	1830	36	0.0196721	0.174757	GO:0051054	GO:BP	positive regulation of DNA metabolic process	18092
query_1	TRUE	0.0136307	99	1830	21	0.0114754	0.212121	GO:0046634	GO:BP	regulation of alpha-beta T cell activation	18092
query_1	TRUE	0.0138838	871	1830	117	0.0639344	0.134328	GO:0001816	GO:BP	cytokine production	18092
query_1	TRUE	0.0138838	73	1830	17	0.00928962	0.232877	GO:1905710	GO:BP	positive regulation of membrane permeability	18092
query_1	TRUE	0.0138838	73	1830	17	0.00928962	0.232877	GO:0002292	GO:BP	T cell differentiation involved in immune response	18092
query_1	TRUE	0.0140852	214	1830	37	0.0202186	0.172897	GO:0061013	GO:BP	regulation of mRNA catabolic process	18092
query_1	TRUE	0.0140852	6175	1830	686	0.374863	0.111093	GO:0044249	GO:BP	cellular biosynthetic process	18092
query_1	TRUE	0.0141848	1363	1830	173	0.0945355	0.126926	GO:1901565	GO:BP	organonitrogen compound catabolic process	18092
query_1	TRUE	0.0142519	17	1830	7	0.00382514	0.411765	GO:0000212	GO:BP	meiotic spindle organization	18092
query_1	TRUE	0.0143161	141	1830	27	0.0147541	0.191489	GO:0002687	GO:BP	positive regulation of leukocyte migration	18092
query_1	TRUE	0.0143507	120	1830	24	0.0131148	0.2	GO:0045931	GO:BP	positive regulation of mitotic cell cycle	18092
query_1	TRUE	0.0143507	120	1830	24	0.0131148	0.2	GO:0002705	GO:BP	positive regulation of leukocyte mediated immunity	18092
query_1	TRUE	0.0143583	67	1830	16	0.00874317	0.238806	GO:0032981	GO:BP	mitochondrial respiratory chain complex I assembly	18092
query_1	TRUE	0.0143583	192	1830	34	0.0185792	0.177083	GO:0009260	GO:BP	ribonucleotide biosynthetic process	18092
query_1	TRUE	0.0143583	67	1830	16	0.00874317	0.238806	GO:0010257	GO:BP	NADH dehydrogenase complex assembly	18092
query_1	TRUE	0.0143583	192	1830	34	0.0185792	0.177083	GO:0002285	GO:BP	lymphocyte activation involved in immune response	18092
query_1	TRUE	0.0144053	43	1830	12	0.00655738	0.27907	GO:1901659	GO:BP	glycosyl compound biosynthetic process	18092
query_1	TRUE	0.0144053	43	1830	12	0.00655738	0.27907	GO:0006284	GO:BP	base-excision repair	18092
query_1	TRUE	0.0145393	435	1830	65	0.0355191	0.149425	GO:0043161	GO:BP	proteasome-mediated ubiquitin-dependent protein catabolic process	18092
query_1	TRUE	0.0146392	32	1830	10	0.00546448	0.3125	GO:0032743	GO:BP	positive regulation of interleukin-2 production	18092
query_1	TRUE	0.0148017	1490	1830	187	0.102186	0.125503	GO:0032270	GO:BP	positive regulation of cellular protein metabolic process	18092
query_1	TRUE	0.0149085	49	1830	13	0.00710383	0.265306	GO:0071349	GO:BP	cellular response to interleukin-12	18092
query_1	TRUE	0.0149343	200	1830	35	0.0191257	0.175	GO:0046390	GO:BP	ribose phosphate biosynthetic process	18092
query_1	TRUE	0.0149931	100	1830	21	0.0114754	0.21	GO:1901264	GO:BP	carbohydrate derivative transport	18092
query_1	TRUE	0.0149931	156	1830	29	0.015847	0.185897	GO:0097530	GO:BP	granulocyte migration	18092
query_1	TRUE	0.0150961	292	1830	47	0.0256831	0.160959	GO:1902105	GO:BP	regulation of leukocyte differentiation	18092
query_1	TRUE	0.0153902	9	1830	5	0.00273224	0.555556	GO:0060700	GO:BP	regulation of ribonuclease activity	18092
query_1	TRUE	0.0153902	27	1830	9	0.00491803	0.333333	GO:0007064	GO:BP	mitotic sister chromatid cohesion	18092
query_1	TRUE	0.0153902	9	1830	5	0.00273224	0.555556	GO:0000022	GO:BP	mitotic spindle elongation	18092
query_1	TRUE	0.0153902	27	1830	9	0.00491803	0.333333	GO:0015949	GO:BP	nucleobase-containing small molecule interconversion	18092
query_1	TRUE	0.0153902	9	1830	5	0.00273224	0.555556	GO:0090306	GO:BP	spindle assembly involved in meiosis	18092
query_1	TRUE	0.0153955	22	1830	8	0.00437158	0.363636	GO:0007063	GO:BP	regulation of sister chromatid cohesion	18092
query_1	TRUE	0.0154708	114	1830	23	0.0125683	0.201754	GO:0002758	GO:BP	innate immune response-activating signal transduction	18092
query_1	TRUE	0.0156762	356	1830	55	0.0300546	0.154494	GO:0031349	GO:BP	positive regulation of defense response	18092
query_1	TRUE	0.0156762	1058	1830	138	0.0754098	0.130435	GO:0002520	GO:BP	immune system development	18092
query_1	TRUE	0.0158219	186	1830	33	0.0180328	0.177419	GO:0032635	GO:BP	interleukin-6 production	18092
query_1	TRUE	0.0158555	164	1830	30	0.0163934	0.182927	GO:0000723	GO:BP	telomere maintenance	18092
query_1	TRUE	0.0163396	68	1830	16	0.00874317	0.235294	GO:0035794	GO:BP	positive regulation of mitochondrial membrane permeability	18092
query_1	TRUE	0.0166291	3	1830	3	0.00163934	1	GO:0060672	GO:BP	epithelial cell morphogenesis involved in placental branching	18092
query_1	TRUE	0.0166291	3	1830	3	0.00163934	1	GO:0032632	GO:BP	interleukin-3 production	18092
query_1	TRUE	0.0166291	3	1830	3	0.00163934	1	GO:0009097	GO:BP	isoleucine biosynthetic process	18092
query_1	TRUE	0.0166291	3	1830	3	0.00163934	1	GO:0060671	GO:BP	epithelial cell differentiation involved in embryonic placenta development	18092
query_1	TRUE	0.0166822	1148	1830	148	0.0808743	0.12892	GO:1901135	GO:BP	carbohydrate derivative metabolic process	18092
query_1	TRUE	0.0169012	108	1830	22	0.0120219	0.203704	GO:0048524	GO:BP	positive regulation of viral process	18092
query_1	TRUE	0.0169012	62	1830	15	0.00819672	0.241935	GO:0018208	GO:BP	peptidyl-proline modification	18092
query_1	TRUE	0.0169012	62	1830	15	0.00819672	0.241935	GO:0042093	GO:BP	T-helper cell differentiation	18092
query_1	TRUE	0.016914	1237	1830	158	0.0863388	0.127728	GO:0044265	GO:BP	cellular macromolecule catabolic process	18092
query_1	TRUE	0.0170306	44	1830	12	0.00655738	0.272727	GO:0000413	GO:BP	protein peptidyl-prolyl isomerization	18092
query_1	TRUE	0.0170306	44	1830	12	0.00655738	0.272727	GO:0009124	GO:BP	nucleoside monophosphate biosynthetic process	18092
query_1	TRUE	0.0172914	382	1830	58	0.031694	0.151832	GO:0030098	GO:BP	lymphocyte differentiation	18092
query_1	TRUE	0.0173669	366	1830	56	0.0306011	0.153005	GO:0051251	GO:BP	positive regulation of lymphocyte activation	18092
query_1	TRUE	0.0175144	622	1830	87	0.047541	0.139871	GO:0019439	GO:BP	aromatic compound catabolic process	18092
query_1	TRUE	0.0177167	195	1830	34	0.0185792	0.174359	GO:0010565	GO:BP	regulation of cellular ketone metabolic process	18092
query_1	TRUE	0.0177167	195	1830	34	0.0185792	0.174359	GO:0002695	GO:BP	negative regulation of leukocyte activation	18092
query_1	TRUE	0.0183113	218	1830	37	0.0202186	0.169725	GO:0050866	GO:BP	negative regulation of cell activation	18092
query_1	TRUE	0.0184243	351	1830	54	0.0295082	0.153846	GO:0019058	GO:BP	viral life cycle	18092
query_1	TRUE	0.0184907	102	1830	21	0.0114754	0.205882	GO:0001909	GO:BP	leukocyte mediated cytotoxicity	18092
query_1	TRUE	0.0186844	166	1830	30	0.0163934	0.180723	GO:0032680	GO:BP	regulation of tumor necrosis factor production	18092
query_1	TRUE	0.0186968	523	1830	75	0.0409836	0.143403	GO:0050900	GO:BP	leukocyte migration	18092
query_1	TRUE	0.0193977	18	1830	7	0.00382514	0.388889	GO:0051782	GO:BP	negative regulation of cell division	18092
query_1	TRUE	0.0193977	18	1830	7	0.00382514	0.388889	GO:0046112	GO:BP	nucleobase biosynthetic process	18092
query_1	TRUE	0.0194727	89	1830	19	0.0103825	0.213483	GO:0009060	GO:BP	aerobic respiration	18092
query_1	TRUE	0.0194727	39	1830	11	0.00601093	0.282051	GO:0016572	GO:BP	histone phosphorylation	18092
query_1	TRUE	0.0194727	425	1830	63	0.0344262	0.148235	GO:0009259	GO:BP	ribonucleotide metabolic process	18092
query_1	TRUE	0.0194727	650	1830	90	0.0491803	0.138462	GO:1901361	GO:BP	organic cyclic compound catabolic process	18092
query_1	TRUE	0.0194727	28	1830	9	0.00491803	0.321429	GO:0060706	GO:BP	cell differentiation involved in embryonic placenta development	18092
query_1	TRUE	0.0194727	39	1830	11	0.00601093	0.282051	GO:0032633	GO:BP	interleukin-4 production	18092
query_1	TRUE	0.0194727	63	1830	15	0.00819672	0.238095	GO:0046365	GO:BP	monosaccharide catabolic process	18092
query_1	TRUE	0.0194727	39	1830	11	0.00601093	0.282051	GO:0090224	GO:BP	regulation of spindle organization	18092
query_1	TRUE	0.0195764	566	1830	80	0.0437158	0.141343	GO:0034655	GO:BP	nucleobase-containing compound catabolic process	18092
query_1	TRUE	0.0196946	189	1830	33	0.0180328	0.174603	GO:2000027	GO:BP	regulation of animal organ morphogenesis	18092
query_1	TRUE	0.020013	6	1830	4	0.00218579	0.666667	GO:0007056	GO:BP	spindle assembly involved in female meiosis	18092
query_1	TRUE	0.020013	6	1830	4	0.00218579	0.666667	GO:0072719	GO:BP	cellular response to cisplatin	18092
query_1	TRUE	0.020013	6	1830	4	0.00218579	0.666667	GO:0009186	GO:BP	deoxyribonucleoside diphosphate metabolic process	18092
query_1	TRUE	0.020013	57	1830	14	0.00765027	0.245614	GO:0019320	GO:BP	hexose catabolic process	18092
query_1	TRUE	0.020013	6	1830	4	0.00218579	0.666667	GO:0009211	GO:BP	pyrimidine deoxyribonucleoside triphosphate metabolic process	18092
query_1	TRUE	0.020013	6	1830	4	0.00218579	0.666667	GO:0009202	GO:BP	deoxyribonucleoside triphosphate biosynthetic process	18092
query_1	TRUE	0.020013	6	1830	4	0.00218579	0.666667	GO:2000348	GO:BP	regulation of CD40 signaling pathway	18092
query_1	TRUE	0.020013	258	1830	42	0.0229508	0.162791	GO:0019318	GO:BP	hexose metabolic process	18092
query_1	TRUE	0.0200288	45	1830	12	0.00655738	0.266667	GO:0002369	GO:BP	T cell cytokine production	18092
query_1	TRUE	0.0202176	103	1830	21	0.0114754	0.203883	GO:0032602	GO:BP	chemokine production	18092
query_1	TRUE	0.0203554	962	1830	126	0.0688525	0.130977	GO:0030097	GO:BP	hemopoiesis	18092
query_1	TRUE	0.020414	110	1830	22	0.0120219	0.2	GO:0002223	GO:BP	stimulatory C-type lectin receptor signaling pathway	18092
query_1	TRUE	0.0204601	410	1830	61	0.0333333	0.14878	GO:0002831	GO:BP	regulation of response to biotic stimulus	18092
query_1	TRUE	0.0209265	205	1830	35	0.0191257	0.170732	GO:0010952	GO:BP	positive regulation of peptidase activity	18092
query_1	TRUE	0.0209265	70	1830	16	0.00874317	0.228571	GO:1902108	GO:BP	regulation of mitochondrial membrane permeability involved in apoptotic process	18092
query_1	TRUE	0.0214729	560	1830	79	0.0431694	0.141071	GO:0002521	GO:BP	leukocyte differentiation	18092
query_1	TRUE	0.0216484	868	1830	115	0.0628415	0.132488	GO:0060341	GO:BP	regulation of cellular localization	18092
query_1	TRUE	0.0218557	198	1830	34	0.0185792	0.171717	GO:0022408	GO:BP	negative regulation of cell-cell adhesion	18092
query_1	TRUE	0.0219497	6218	1830	687	0.37541	0.110486	GO:1901360	GO:BP	organic cyclic compound metabolic process	18092
query_1	TRUE	0.0221203	64	1830	15	0.00819672	0.234375	GO:1902110	GO:BP	positive regulation of mitochondrial membrane permeability involved in apoptotic process	18092
query_1	TRUE	0.0221469	97	1830	20	0.010929	0.206186	GO:0010822	GO:BP	positive regulation of mitochondrion organization	18092
query_1	TRUE	0.0226948	118	1830	23	0.0125683	0.194915	GO:0006757	GO:BP	ATP generation from ADP	18092
query_1	TRUE	0.0227966	983	1830	128	0.0699454	0.130214	GO:0030163	GO:BP	protein catabolic process	18092
query_1	TRUE	0.0229046	14	1830	6	0.00327869	0.428571	GO:0001833	GO:BP	inner cell mass cell proliferation	18092
query_1	TRUE	0.0230676	58	1830	14	0.00765027	0.241379	GO:0006977	GO:BP	DNA damage response, signal transduction by p53 class mediator resulting in cell cycle arrest	18092
query_1	TRUE	0.023295	40	1830	11	0.00601093	0.275	GO:0000387	GO:BP	spliceosomal snRNP assembly	18092
query_1	TRUE	0.023295	40	1830	11	0.00601093	0.275	GO:0030866	GO:BP	cortical actin cytoskeleton organization	18092
query_1	TRUE	0.023414	147	1830	27	0.0147541	0.183673	GO:0030010	GO:BP	establishment of cell polarity	18092
query_1	TRUE	0.0235497	184	1830	32	0.0174863	0.173913	GO:1901796	GO:BP	regulation of signal transduction by p53 class mediator	18092
query_1	TRUE	0.0237342	46	1830	12	0.00655738	0.26087	GO:0032480	GO:BP	negative regulation of type I interferon production	18092
query_1	TRUE	0.0237342	46	1830	12	0.00655738	0.26087	GO:0032620	GO:BP	interleukin-17 production	18092
query_1	TRUE	0.0237342	1002	1830	130	0.0710383	0.129741	GO:0048534	GO:BP	hematopoietic or lymphoid organ development	18092
query_1	TRUE	0.0238182	71	1830	16	0.00874317	0.225352	GO:0009206	GO:BP	purine ribonucleoside triphosphate biosynthetic process	18092
query_1	TRUE	0.0240833	29	1830	9	0.00491803	0.310345	GO:0000027	GO:BP	ribosomal large subunit assembly	18092
query_1	TRUE	0.0244437	126	1830	24	0.0131148	0.190476	GO:0050868	GO:BP	negative regulation of T cell activation	18092
query_1	TRUE	0.0244437	10	1830	5	0.00273224	0.5	GO:0032070	GO:BP	regulation of deoxyribonuclease activity	18092
query_1	TRUE	0.0244437	10	1830	5	0.00273224	0.5	GO:0009113	GO:BP	purine nucleobase biosynthetic process	18092
query_1	TRUE	0.0244437	10	1830	5	0.00273224	0.5	GO:0002934	GO:BP	desmosome organization	18092
query_1	TRUE	0.0244437	10	1830	5	0.00273224	0.5	GO:0033314	GO:BP	mitotic DNA replication checkpoint	18092
query_1	TRUE	0.0244437	10	1830	5	0.00273224	0.5	GO:0007144	GO:BP	female meiosis I	18092
query_1	TRUE	0.0244437	10	1830	5	0.00273224	0.5	GO:0007042	GO:BP	lysosomal lumen acidification	18092
query_1	TRUE	0.0244437	10	1830	5	0.00273224	0.5	GO:0034447	GO:BP	very-low-density lipoprotein particle clearance	18092
query_1	TRUE	0.0244437	10	1830	5	0.00273224	0.5	GO:0051231	GO:BP	spindle elongation	18092
query_1	TRUE	0.0244437	126	1830	24	0.0131148	0.190476	GO:0046031	GO:BP	ADP metabolic process	18092
query_1	TRUE	0.0246	105	1830	21	0.0114754	0.2	GO:0045069	GO:BP	regulation of viral genome replication	18092
query_1	TRUE	0.0249666	170	1830	30	0.0163934	0.176471	GO:0032640	GO:BP	tumor necrosis factor production	18092
query_1	TRUE	0.0255141	19	1830	7	0.00382514	0.368421	GO:0002523	GO:BP	leukocyte migration involved in inflammatory response	18092
query_1	TRUE	0.0255141	19	1830	7	0.00382514	0.368421	GO:0070230	GO:BP	positive regulation of lymphocyte apoptotic process	18092
query_1	TRUE	0.0258152	141	1830	26	0.0142077	0.184397	GO:0009185	GO:BP	ribonucleoside diphosphate metabolic process	18092
query_1	TRUE	0.0260452	85	1830	18	0.00983607	0.211765	GO:0009205	GO:BP	purine ribonucleoside triphosphate metabolic process	18092
query_1	TRUE	0.0261362	59	1830	14	0.00765027	0.237288	GO:0045851	GO:BP	pH reduction	18092
query_1	TRUE	0.0261362	59	1830	14	0.00765027	0.237288	GO:0072431	GO:BP	signal transduction involved in mitotic G1 DNA damage checkpoint	18092
query_1	TRUE	0.0261362	59	1830	14	0.00765027	0.237288	GO:0007131	GO:BP	reciprocal meiotic recombination	18092
query_1	TRUE	0.0261362	59	1830	14	0.00765027	0.237288	GO:0140527	GO:BP	reciprocal homologous recombination	18092
query_1	TRUE	0.0261362	59	1830	14	0.00765027	0.237288	GO:1902400	GO:BP	intracellular signal transduction involved in G1 DNA damage checkpoint	18092
query_1	TRUE	0.0261362	216	1830	36	0.0196721	0.166667	GO:0006006	GO:BP	glucose metabolic process	18092
query_1	TRUE	0.0261362	35	1830	10	0.00546448	0.285714	GO:0031572	GO:BP	G2 DNA damage checkpoint	18092
query_1	TRUE	0.0261362	753	1830	101	0.0551913	0.13413	GO:0051129	GO:BP	negative regulation of cellular component organization	18092
query_1	TRUE	0.0261362	35	1830	10	0.00546448	0.285714	GO:0060236	GO:BP	regulation of mitotic spindle organization	18092
query_1	TRUE	0.026533	127	1830	24	0.0131148	0.188976	GO:1990266	GO:BP	neutrophil migration	18092
query_1	TRUE	0.0266113	72	1830	16	0.00874317	0.222222	GO:0009145	GO:BP	purine nucleoside triphosphate biosynthetic process	18092
query_1	TRUE	0.02684	99	1830	20	0.010929	0.20202	GO:0000079	GO:BP	regulation of cyclin-dependent protein serine/threonine kinase activity	18092
query_1	TRUE	0.02684	120	1830	23	0.0125683	0.191667	GO:0031109	GO:BP	microtubule polymerization or depolymerization	18092
query_1	TRUE	0.0268849	2868	1830	334	0.182514	0.116457	GO:0035556	GO:BP	intracellular signal transduction	18092
query_1	TRUE	0.0269428	113	1830	22	0.0120219	0.19469	GO:0002220	GO:BP	innate immune response activating cell surface receptor signaling pathway	18092
query_1	TRUE	0.0271133	209	1830	35	0.0191257	0.167464	GO:0045089	GO:BP	positive regulation of innate immune response	18092
query_1	TRUE	0.027214	41	1830	11	0.00601093	0.268293	GO:0006369	GO:BP	termination of RNA polymerase II transcription	18092
query_1	TRUE	0.0274062	47	1830	12	0.00655738	0.255319	GO:0002711	GO:BP	positive regulation of T cell mediated immunity	18092
query_1	TRUE	0.0277386	217	1830	36	0.0196721	0.165899	GO:0002685	GO:BP	regulation of leukocyte migration	18092
query_1	TRUE	0.028372	66	1830	15	0.00819672	0.227273	GO:0031571	GO:BP	mitotic G1 DNA damage checkpoint	18092
query_1	TRUE	0.028372	264	1830	42	0.0229508	0.159091	GO:0031334	GO:BP	positive regulation of protein-containing complex assembly	18092
query_1	TRUE	0.0290008	756	1830	101	0.0551913	0.133598	GO:0051603	GO:BP	proteolysis involved in cellular protein catabolic process	18092
query_1	TRUE	0.0291205	1027	1830	132	0.0721311	0.12853	GO:0019752	GO:BP	carboxylic acid metabolic process	18092
query_1	TRUE	0.0296017	2789	1830	325	0.177596	0.116529	GO:0008104	GO:BP	protein localization	18092
query_1	TRUE	0.0298588	931	1830	121	0.0661202	0.129968	GO:0043549	GO:BP	regulation of kinase activity	18092
query_1	TRUE	0.0298796	107	1830	21	0.0114754	0.196262	GO:0008630	GO:BP	intrinsic apoptotic signaling pathway in response to DNA damage	18092
query_1	TRUE	0.0298796	107	1830	21	0.0114754	0.196262	GO:0034404	GO:BP	nucleobase-containing small molecule biosynthetic process	18092
query_1	TRUE	0.0299919	60	1830	14	0.00765027	0.233333	GO:0032653	GO:BP	regulation of interleukin-10 production	18092
query_1	TRUE	0.0302924	818	1830	108	0.0590164	0.132029	GO:0044257	GO:BP	cellular protein catabolic process	18092
query_1	TRUE	0.0310799	1639	1830	200	0.10929	0.122026	GO:0055085	GO:BP	transmembrane transport	18092
query_1	TRUE	0.0315139	793	1830	105	0.057377	0.132409	GO:0001817	GO:BP	regulation of cytokine production	18092
query_1	TRUE	0.0317391	15	1830	6	0.00327869	0.4	GO:0051315	GO:BP	attachment of mitotic spindle microtubules to kinetochore	18092
query_1	TRUE	0.0317391	15	1830	6	0.00327869	0.4	GO:0009263	GO:BP	deoxyribonucleotide biosynthetic process	18092
query_1	TRUE	0.0317391	15	1830	6	0.00327869	0.4	GO:0002827	GO:BP	positive regulation of T-helper 1 type immune response	18092
query_1	TRUE	0.0317391	15	1830	6	0.00327869	0.4	GO:0009209	GO:BP	pyrimidine ribonucleoside triphosphate biosynthetic process	18092
query_1	TRUE	0.0317391	15	1830	6	0.00327869	0.4	GO:0035751	GO:BP	regulation of lysosomal lumen pH	18092
query_1	TRUE	0.0319319	151	1830	27	0.0147541	0.178808	GO:0046631	GO:BP	alpha-beta T cell activation	18092
query_1	TRUE	0.0320969	67	1830	15	0.00819672	0.223881	GO:0044783	GO:BP	G1 DNA damage checkpoint	18092
query_1	TRUE	0.0320969	181	1830	31	0.0169399	0.171271	GO:0071346	GO:BP	cellular response to interferon-gamma	18092
query_1	TRUE	0.0320969	67	1830	15	0.00819672	0.223881	GO:0072678	GO:BP	T cell migration	18092
query_1	TRUE	0.0320969	87	1830	18	0.00983607	0.206897	GO:0050672	GO:BP	negative regulation of lymphocyte proliferation	18092
query_1	TRUE	0.0320969	25	1830	8	0.00437158	0.32	GO:0008334	GO:BP	histone mRNA metabolic process	18092
query_1	TRUE	0.0320969	67	1830	15	0.00819672	0.223881	GO:0044819	GO:BP	mitotic G1/S transition checkpoint	18092
query_1	TRUE	0.0321534	306	1830	47	0.0256831	0.153595	GO:1903829	GO:BP	positive regulation of cellular protein localization	18092
query_1	TRUE	0.0324489	115	1830	22	0.0120219	0.191304	GO:0071887	GO:BP	leukocyte apoptotic process	18092
query_1	TRUE	0.0325763	371	1830	55	0.0300546	0.148248	GO:0001666	GO:BP	response to hypoxia	18092
query_1	TRUE	0.0328974	243	1830	39	0.0213115	0.160494	GO:0032886	GO:BP	regulation of microtubule-based process	18092
query_1	TRUE	0.0332155	20	1830	7	0.00382514	0.35	GO:0070242	GO:BP	thymocyte apoptotic process	18092
query_1	TRUE	0.0332155	159	1830	28	0.0153005	0.176101	GO:1902600	GO:BP	proton transmembrane transport	18092
query_1	TRUE	0.0333445	2091	1830	249	0.136066	0.119082	GO:0008283	GO:BP	cell population proliferation	18092
query_1	TRUE	0.0336138	220	1830	36	0.0196721	0.163636	GO:0043281	GO:BP	regulation of cysteine-type endopeptidase activity involved in apoptotic process	18092
query_1	TRUE	0.0339008	5806	1830	641	0.350273	0.110403	GO:0019538	GO:BP	protein metabolic process	18092
query_1	TRUE	0.0339533	61	1830	14	0.00765027	0.229508	GO:0072413	GO:BP	signal transduction involved in mitotic cell cycle checkpoint	18092
query_1	TRUE	0.0339533	61	1830	14	0.00765027	0.229508	GO:1902403	GO:BP	signal transduction involved in mitotic DNA integrity checkpoint	18092
query_1	TRUE	0.0339533	61	1830	14	0.00765027	0.229508	GO:1902402	GO:BP	signal transduction involved in mitotic DNA damage checkpoint	18092
query_1	TRUE	0.0339533	61	1830	14	0.00765027	0.229508	GO:0035825	GO:BP	homologous recombination	18092
query_1	TRUE	0.0342135	463	1830	66	0.0360656	0.142549	GO:0051090	GO:BP	regulation of DNA-binding transcription factor activity	18092
query_1	TRUE	0.0348732	81	1830	17	0.00928962	0.209877	GO:0046902	GO:BP	regulation of mitochondrial membrane permeability	18092
query_1	TRUE	0.0353328	145	1830	26	0.0142077	0.17931	GO:0070585	GO:BP	protein localization to mitochondrion	18092
query_1	TRUE	0.0353328	145	1830	26	0.0142077	0.17931	GO:0002700	GO:BP	regulation of production of molecular mediator of immune response	18092
query_1	TRUE	0.0356288	88	1830	18	0.00983607	0.204545	GO:0032945	GO:BP	negative regulation of mononuclear cell proliferation	18092
query_1	TRUE	0.035767	31	1830	9	0.00491803	0.290323	GO:0045577	GO:BP	regulation of B cell differentiation	18092
query_1	TRUE	0.035767	31	1830	9	0.00491803	0.290323	GO:0034377	GO:BP	plasma lipoprotein particle assembly	18092
query_1	TRUE	0.0362044	7	1830	4	0.00218579	0.571429	GO:0042938	GO:BP	dipeptide transport	18092
query_1	TRUE	0.0362044	7	1830	4	0.00218579	0.571429	GO:0032466	GO:BP	negative regulation of cytokinesis	18092
query_1	TRUE	0.0362044	7	1830	4	0.00218579	0.571429	GO:0035442	GO:BP	dipeptide transmembrane transport	18092
query_1	TRUE	0.0362044	7	1830	4	0.00218579	0.571429	GO:0051305	GO:BP	chromosome movement towards spindle pole	18092
query_1	TRUE	0.0362044	7	1830	4	0.00218579	0.571429	GO:0006771	GO:BP	riboflavin metabolic process	18092
query_1	TRUE	0.0362044	7	1830	4	0.00218579	0.571429	GO:0006549	GO:BP	isoleucine metabolic process	18092
query_1	TRUE	0.0365104	11	1830	5	0.00273224	0.454545	GO:0006054	GO:BP	N-acetylneuraminate metabolic process	18092
query_1	TRUE	0.0365104	11	1830	5	0.00273224	0.454545	GO:0043097	GO:BP	pyrimidine nucleoside salvage	18092
query_1	TRUE	0.0365104	11	1830	5	0.00273224	0.454545	GO:0008655	GO:BP	pyrimidine-containing compound salvage	18092
query_1	TRUE	0.0365104	11	1830	5	0.00273224	0.454545	GO:0035672	GO:BP	oligopeptide transmembrane transport	18092
query_1	TRUE	0.0365104	11	1830	5	0.00273224	0.454545	GO:0006563	GO:BP	L-serine metabolic process	18092
query_1	TRUE	0.036856	49	1830	12	0.00655738	0.244898	GO:0002820	GO:BP	negative regulation of adaptive immune response	18092
query_1	TRUE	0.0368709	253	1830	40	0.0218579	0.158103	GO:0065004	GO:BP	protein-DNA complex assembly	18092
query_1	TRUE	0.0368709	131	1830	24	0.0131148	0.183206	GO:0071621	GO:BP	granulocyte chemotaxis	18092
query_1	TRUE	0.0374266	75	1830	16	0.00874317	0.213333	GO:0006487	GO:BP	protein N-linked glycosylation	18092
query_1	TRUE	0.0374266	75	1830	16	0.00874317	0.213333	GO:0038034	GO:BP	signal transduction in absence of ligand	18092
query_1	TRUE	0.0374266	75	1830	16	0.00874317	0.213333	GO:0097192	GO:BP	extrinsic apoptotic signaling pathway in absence of ligand	18092
query_1	TRUE	0.0384687	117	1830	22	0.0120219	0.188034	GO:0006096	GO:BP	glycolytic process	18092
query_1	TRUE	0.0384687	117	1830	22	0.0120219	0.188034	GO:2000736	GO:BP	regulation of stem cell differentiation	18092
query_1	TRUE	0.0390322	139	1830	25	0.0136612	0.179856	GO:0046718	GO:BP	viral entry into host cell	18092
query_1	TRUE	0.0390322	139	1830	25	0.0136612	0.179856	GO:0009135	GO:BP	purine nucleoside diphosphate metabolic process	18092
query_1	TRUE	0.0390322	139	1830	25	0.0136612	0.179856	GO:0009179	GO:BP	purine ribonucleoside diphosphate metabolic process	18092
query_1	TRUE	0.0393223	103	1830	20	0.010929	0.194175	GO:1904029	GO:BP	regulation of cyclin-dependent protein kinase activity	18092
query_1	TRUE	0.0395681	154	1830	27	0.0147541	0.175325	GO:0006090	GO:BP	pyruvate metabolic process	18092
query_1	TRUE	0.0395681	215	1830	35	0.0191257	0.162791	GO:0072522	GO:BP	purine-containing compound biosynthetic process	18092
query_1	TRUE	0.0396202	1578	1830	192	0.104918	0.121673	GO:0051247	GO:BP	positive regulation of protein metabolic process	18092
query_1	TRUE	0.0399571	11403	1830	1207	0.659563	0.105849	GO:0071704	GO:BP	organic substance metabolic process	18092
query_1	TRUE	0.0405787	69	1830	15	0.00819672	0.217391	GO:0050766	GO:BP	positive regulation of phagocytosis	18092
query_1	TRUE	0.0407067	56	1830	13	0.00710383	0.232143	GO:0051452	GO:BP	intracellular pH reduction	18092
query_1	TRUE	0.0407143	620	1830	84	0.0459016	0.135484	GO:0010638	GO:BP	positive regulation of organelle organization	18092
query_1	TRUE	0.0415263	451	1830	64	0.0349727	0.141907	GO:0006163	GO:BP	purine nucleotide metabolic process	18092
query_1	TRUE	0.0425284	21	1830	7	0.00382514	0.333333	GO:0002544	GO:BP	chronic inflammatory response	18092
query_1	TRUE	0.0425284	170	1830	29	0.015847	0.170588	GO:0001906	GO:BP	cell killing	18092
query_1	TRUE	0.0425284	16	1830	6	0.00327869	0.375	GO:0034134	GO:BP	toll-like receptor 2 signaling pathway	18092
query_1	TRUE	0.0425284	16	1830	6	0.00327869	0.375	GO:0002830	GO:BP	positive regulation of type 2 immune response	18092
query_1	TRUE	0.0425284	21	1830	7	0.00382514	0.333333	GO:0043371	GO:BP	negative regulation of CD4-positive, alpha-beta T cell differentiation	18092
query_1	TRUE	0.043106	32	1830	9	0.00491803	0.28125	GO:2000515	GO:BP	negative regulation of CD4-positive, alpha-beta T cell activation	18092
query_1	TRUE	0.0435583	240	1830	38	0.020765	0.158333	GO:0038093	GO:BP	Fc receptor signaling pathway	18092
query_1	TRUE	0.0438071	178	1830	30	0.0163934	0.168539	GO:0032200	GO:BP	telomere organization	18092
query_1	TRUE	0.0443218	163	1830	28	0.0153005	0.171779	GO:0051092	GO:BP	positive regulation of NF-kappaB transcription factor activity	18092
query_1	TRUE	0.0443218	38	1830	10	0.00546448	0.263158	GO:0032733	GO:BP	positive regulation of interleukin-10 production	18092
query_1	TRUE	0.0443218	38	1830	10	0.00546448	0.263158	GO:0042769	GO:BP	DNA damage response, detection of DNA damage	18092
query_1	TRUE	0.0446397	411	1830	59	0.0322404	0.143552	GO:0009150	GO:BP	purine ribonucleotide metabolic process	18092
query_1	TRUE	0.0452656	4	1830	3	0.00163934	0.75	GO:0046075	GO:BP	dTTP metabolic process	18092
query_1	TRUE	0.0452656	4	1830	3	0.00163934	0.75	GO:0033092	GO:BP	positive regulation of immature T cell proliferation in thymus	18092
query_1	TRUE	0.0452656	4	1830	3	0.00163934	0.75	GO:0009189	GO:BP	deoxyribonucleoside diphosphate biosynthetic process	18092
query_1	TRUE	0.0452656	4	1830	3	0.00163934	0.75	GO:1905340	GO:BP	regulation of protein localization to kinetochore	18092
query_1	TRUE	0.0452656	4	1830	3	0.00163934	0.75	GO:0009051	GO:BP	pentose-phosphate shunt, oxidative branch	18092
query_1	TRUE	0.0452656	4	1830	3	0.00163934	0.75	GO:0033489	GO:BP	cholesterol biosynthetic process via desmosterol	18092
query_1	TRUE	0.0452656	4	1830	3	0.00163934	0.75	GO:0009212	GO:BP	pyrimidine deoxyribonucleoside triphosphate biosynthetic process	18092
query_1	TRUE	0.0452656	4	1830	3	0.00163934	0.75	GO:0033490	GO:BP	cholesterol biosynthetic process via lathosterol	18092
query_1	TRUE	0.0452656	4	1830	3	0.00163934	0.75	GO:1905342	GO:BP	positive regulation of protein localization to kinetochore	18092
query_1	TRUE	0.0452656	4	1830	3	0.00163934	0.75	GO:0032875	GO:BP	regulation of DNA endoreduplication	18092
query_1	TRUE	0.0452656	4	1830	3	0.00163934	0.75	GO:0032079	GO:BP	positive regulation of endodeoxyribonuclease activity	18092
query_1	TRUE	0.0452656	4	1830	3	0.00163934	0.75	GO:0006565	GO:BP	L-serine catabolic process	18092
query_1	TRUE	0.0452656	4	1830	3	0.00163934	0.75	GO:0006235	GO:BP	dTTP biosynthetic process	18092
query_1	TRUE	0.0452656	4	1830	3	0.00163934	0.75	GO:0071962	GO:BP	mitotic sister chromatid cohesion, centromeric	18092
query_1	TRUE	0.0452656	4	1830	3	0.00163934	0.75	GO:0030951	GO:BP	establishment or maintenance of microtubule cytoskeleton polarity	18092
query_1	TRUE	0.0452656	4	1830	3	0.00163934	0.75	GO:0097212	GO:BP	lysosomal membrane organization	18092
query_1	TRUE	0.0452656	141	1830	25	0.0136612	0.177305	GO:0072655	GO:BP	establishment of protein localization to mitochondrion	18092
query_1	TRUE	0.0457607	1494	1830	182	0.0994536	0.121821	GO:0007155	GO:BP	cell adhesion	18092
query_1	TRUE	0.045898	273	1830	42	0.0229508	0.153846	GO:0051091	GO:BP	positive regulation of DNA-binding transcription factor activity	18092
query_1	TRUE	0.0461755	179	1830	30	0.0163934	0.167598	GO:0009152	GO:BP	purine ribonucleotide biosynthetic process	18092
query_1	TRUE	0.046852	105	1830	20	0.010929	0.190476	GO:0033108	GO:BP	mitochondrial respiratory chain complex assembly	18092
query_1	TRUE	0.0477198	226	1830	36	0.0196721	0.159292	GO:0051651	GO:BP	maintenance of location in cell	18092
query_1	TRUE	0.0484896	27	1830	8	0.00437158	0.296296	GO:0010971	GO:BP	positive regulation of G2/M transition of mitotic cell cycle	18092
query_1	TRUE	0.0485847	250	1830	39	0.0213115	0.156	GO:0071216	GO:BP	cellular response to biotic stimulus	18092
query_1	TRUE	0.0486223	51	1830	12	0.00655738	0.235294	GO:0043303	GO:BP	mast cell degranulation	18092
query_1	TRUE	0.0486223	51	1830	12	0.00655738	0.235294	GO:0009161	GO:BP	ribonucleoside monophosphate metabolic process	18092
query_1	TRUE	0.0488152	472	1830	66	0.0360656	0.139831	GO:0009314	GO:BP	response to radiation	18092
query_1	TRUE	0.0494097	120	1830	22	0.0120219	0.183333	GO:0018107	GO:BP	peptidyl-threonine phosphorylation	18092
query_1	TRUE	1.6212e-30	11888	1915	1436	0.749869	0.120794	GO:0005737	GO:CC	cytoplasm	18963
query_1	TRUE	2.12211e-26	14764	1915	1673	0.873629	0.113316	GO:0005622	GO:CC	intracellular anatomical structure	18963
query_1	TRUE	6.25413e-25	11250	1915	1353	0.706527	0.120267	GO:0043231	GO:CC	intracellular membrane-bounded organelle	18963
query_1	TRUE	7.86086e-25	5468	1915	760	0.396867	0.13899	GO:0031974	GO:CC	membrane-enclosed lumen	18963
query_1	TRUE	7.86086e-25	5468	1915	760	0.396867	0.13899	GO:0043233	GO:CC	organelle lumen	18963
query_1	TRUE	4.62014e-23	5304	1915	734	0.38329	0.138386	GO:0070013	GO:CC	intracellular organelle lumen	18963
query_1	TRUE	8.63583e-22	12836	1915	1486	0.775979	0.115768	GO:0043227	GO:CC	membrane-bounded organelle	18963
query_1	TRUE	3.46916e-21	12431	1915	1446	0.755091	0.116322	GO:0043229	GO:CC	intracellular organelle	18963
query_1	TRUE	6.72295e-20	5231	1915	711	0.371279	0.13592	GO:0005829	GO:CC	cytosol	18963
query_1	TRUE	5.28965e-18	4343	1915	603	0.314883	0.138844	GO:0031981	GO:CC	nuclear lumen	18963
query_1	TRUE	9.03471e-17	196	1915	65	0.0339426	0.331633	GO:0000775	GO:CC	chromosome, centromeric region	18963
query_1	TRUE	9.26389e-17	3991	1915	557	0.290862	0.139564	GO:0005654	GO:CC	nucleoplasm	18963
query_1	TRUE	1.04533e-16	13974	1915	1566	0.817755	0.112065	GO:0043226	GO:CC	organelle	18963
query_1	TRUE	3.08163e-16	4326	1915	592	0.309138	0.136847	GO:0043232	GO:CC	intracellular non-membrane-bounded organelle	18963
query_1	TRUE	4.16291e-16	4333	1915	592	0.309138	0.136626	GO:0043228	GO:CC	non-membrane-bounded organelle	18963
query_1	TRUE	1.00525e-15	376	1915	95	0.0496084	0.25266	GO:0005819	GO:CC	spindle	18963
query_1	TRUE	4.81757e-15	947	1915	178	0.0929504	0.187962	GO:0005694	GO:CC	chromosome	18963
query_1	TRUE	7.00518e-15	114	1915	45	0.0234987	0.394737	GO:0000779	GO:CC	condensed chromosome, centromeric region	18963
query_1	TRUE	1.9487e-14	262	1915	73	0.0381201	0.278626	GO:0098687	GO:CC	chromosomal region	18963
query_1	TRUE	2.99072e-13	139	1915	48	0.0250653	0.345324	GO:0000776	GO:CC	kinetochore	18963
query_1	TRUE	9.8759e-13	212	1915	61	0.0318538	0.287736	GO:0000793	GO:CC	condensed chromosome	18963
query_1	TRUE	1.17236e-12	1666	1915	263	0.137337	0.157863	GO:0005739	GO:CC	mitochondrion	18963
query_1	TRUE	3.38404e-12	108	1915	40	0.0208877	0.37037	GO:0000777	GO:CC	condensed chromosome kinetochore	18963
query_1	TRUE	5.53004e-12	503	1915	106	0.0553525	0.210736	GO:0005743	GO:CC	mitochondrial inner membrane	18963
query_1	TRUE	6.46321e-12	7565	1915	914	0.477285	0.12082	GO:0005634	GO:CC	nucleus	18963
query_1	TRUE	1.1761e-11	271	1915	69	0.0360313	0.254613	GO:0098798	GO:CC	mitochondrial protein-containing complex	18963
query_1	TRUE	1.23983e-11	793	1915	146	0.0762402	0.184111	GO:0005740	GO:CC	mitochondrial envelope	18963
query_1	TRUE	1.46745e-11	1243	1915	205	0.10705	0.164924	GO:0031975	GO:CC	envelope	18963
query_1	TRUE	1.46745e-11	1243	1915	205	0.10705	0.164924	GO:0031967	GO:CC	organelle envelope	18963
query_1	TRUE	2.3568e-11	564	1915	113	0.0590078	0.200355	GO:0019866	GO:CC	organelle inner membrane	18963
query_1	TRUE	1.10567e-09	744	1915	133	0.0694517	0.178763	GO:0031966	GO:CC	mitochondrial membrane	18963
query_1	TRUE	3.2413e-09	137	1915	41	0.0214099	0.29927	GO:0072686	GO:CC	mitotic spindle	18963
query_1	TRUE	3.80293e-09	10	1915	10	0.00522193	1	GO:0071162	GO:CC	CMG complex	18963
query_1	TRUE	4.04197e-09	12	1915	11	0.00574413	0.916667	GO:0031261	GO:CC	DNA replication preinitiation complex	18963
query_1	TRUE	4.46641e-09	1283	1915	200	0.104439	0.155885	GO:0015630	GO:CC	microtubule cytoskeleton	18963
query_1	TRUE	1.08673e-08	5556	1915	680	0.355091	0.12239	GO:0032991	GO:CC	protein-containing complex	18963
query_1	TRUE	4.59476e-08	184	1915	47	0.0245431	0.255435	GO:0101002	GO:CC	ficolin-1-rich granule	18963
query_1	TRUE	5.23359e-08	167	1915	44	0.0229765	0.263473	GO:0000922	GO:CC	spindle pole	18963
query_1	TRUE	5.85864e-08	254	1915	58	0.0302872	0.228346	GO:0000228	GO:CC	nuclear chromosome	18963
query_1	TRUE	2.55211e-07	101	1915	31	0.016188	0.306931	GO:0070469	GO:CC	respirasome	18963
query_1	TRUE	7.2902e-07	163	1915	41	0.0214099	0.251534	GO:0070820	GO:CC	tertiary granule	18963
query_1	TRUE	8.84953e-07	938	1915	147	0.0767624	0.156716	GO:0005730	GO:CC	nucleolus	18963
query_1	TRUE	9.36159e-07	85	1915	27	0.0140992	0.317647	GO:0098803	GO:CC	respiratory chain complex	18963
query_1	TRUE	9.36159e-07	3619	1915	456	0.23812	0.126002	GO:0031090	GO:CC	organelle membrane	18963
query_1	TRUE	1.90372e-06	14	1915	10	0.00522193	0.714286	GO:0000940	GO:CC	condensed chromosome outer kinetochore	18963
query_1	TRUE	1.96417e-06	88	1915	27	0.0140992	0.306818	GO:0000313	GO:CC	organellar ribosome	18963
query_1	TRUE	1.96417e-06	88	1915	27	0.0140992	0.306818	GO:0005761	GO:CC	mitochondrial ribosome	18963
query_1	TRUE	3.35607e-06	124	1915	33	0.0172324	0.266129	GO:1904813	GO:CC	ficolin-1-rich granule lumen	18963
query_1	TRUE	4.13229e-06	12	1915	9	0.00469974	0.75	GO:0042555	GO:CC	MCM complex	18963
query_1	TRUE	4.13229e-06	18	1915	11	0.00574413	0.611111	GO:0000778	GO:CC	condensed nuclear chromosome kinetochore	18963
query_1	TRUE	5.46559e-06	71	1915	23	0.0120104	0.323944	GO:0005657	GO:CC	replication fork	18963
query_1	TRUE	6.79257e-06	146	1915	36	0.018799	0.246575	GO:0098800	GO:CC	inner mitochondrial membrane protein complex	18963
query_1	TRUE	6.99029e-06	184	1915	42	0.0219321	0.228261	GO:0030496	GO:CC	midbody	18963
query_1	TRUE	6.99029e-06	72	1915	23	0.0120104	0.319444	GO:0070821	GO:CC	tertiary granule membrane	18963
query_1	TRUE	8.54369e-06	89	1915	26	0.013577	0.292135	GO:0005746	GO:CC	mitochondrial respirasome	18963
query_1	TRUE	9.2832e-06	68	1915	22	0.0114883	0.323529	GO:0005876	GO:CC	spindle microtubule	18963
query_1	TRUE	2.34827e-05	1422	1915	198	0.103394	0.139241	GO:1902494	GO:CC	catalytic complex	18963
query_1	TRUE	2.591e-05	442	1915	77	0.0402089	0.174208	GO:0005874	GO:CC	microtubule	18963
query_1	TRUE	3.13504e-05	57	1915	19	0.00992167	0.333333	GO:0005762	GO:CC	mitochondrial large ribosomal subunit	18963
query_1	TRUE	3.13504e-05	57	1915	19	0.00992167	0.333333	GO:0000315	GO:CC	organellar large ribosomal subunit	18963
query_1	TRUE	3.49281e-05	855	1915	129	0.0673629	0.150877	GO:0030141	GO:CC	secretory granule	18963
query_1	TRUE	4.95673e-05	1337	1915	186	0.0971279	0.139117	GO:0099080	GO:CC	supramolecular complex	18963
query_1	TRUE	8.94605e-05	36	1915	14	0.0073107	0.388889	GO:0051233	GO:CC	spindle midzone	18963
query_1	TRUE	9.62862e-05	89	1915	24	0.0125326	0.269663	GO:0000794	GO:CC	condensed nuclear chromosome	18963
query_1	TRUE	0.000108163	2302	1915	294	0.153525	0.127715	GO:0005856	GO:CC	cytoskeleton	18963
query_1	TRUE	0.000117594	795	1915	119	0.062141	0.149686	GO:0005815	GO:CC	microtubule organizing center	18963
query_1	TRUE	0.000117594	7	1915	6	0.00313316	0.857143	GO:0000796	GO:CC	condensin complex	18963
query_1	TRUE	0.000153132	33	1915	13	0.00678851	0.393939	GO:0070069	GO:CC	cytochrome complex	18963
query_1	TRUE	0.000242482	39	1915	14	0.0073107	0.358974	GO:0043596	GO:CC	nuclear replication fork	18963
query_1	TRUE	0.000266347	158	1915	34	0.0177546	0.21519	GO:0042581	GO:CC	specific granule	18963
query_1	TRUE	0.000285324	1028	1915	145	0.075718	0.141051	GO:0099503	GO:CC	secretory vesicle	18963
query_1	TRUE	0.000291908	66	1915	19	0.00992167	0.287879	GO:0000502	GO:CC	proteasome complex	18963
query_1	TRUE	0.000312862	72	1915	20	0.0104439	0.277778	GO:1905369	GO:CC	endopeptidase complex	18963
query_1	TRUE	0.000361302	115	1915	27	0.0140992	0.234783	GO:1990204	GO:CC	oxidoreductase complex	18963
query_1	TRUE	0.00037647	8	1915	6	0.00313316	0.75	GO:0031298	GO:CC	replication fork protection complex	18963
query_1	TRUE	0.00037647	8	1915	6	0.00313316	0.75	GO:0031390	GO:CC	Ctf18 RFC-like complex	18963
query_1	TRUE	0.000388229	97	1915	24	0.0125326	0.247423	GO:0031970	GO:CC	organelle envelope lumen	18963
query_1	TRUE	0.0004852	130	1915	29	0.0151436	0.223077	GO:0140534	GO:CC	endoplasmic reticulum protein-containing complex	18963
query_1	TRUE	0.0004874	52	1915	16	0.00835509	0.307692	GO:0005871	GO:CC	kinesin complex	18963
query_1	TRUE	0.000491262	602	1915	92	0.0480418	0.152824	GO:0005813	GO:CC	centrosome	18963
query_1	TRUE	0.000533739	2437	1915	303	0.158225	0.124333	GO:0031410	GO:CC	cytoplasmic vesicle	18963
query_1	TRUE	0.000598066	2441	1915	303	0.158225	0.124129	GO:0097708	GO:CC	intracellular vesicle	18963
query_1	TRUE	0.000804383	6	1915	5	0.00261097	0.833333	GO:0032133	GO:CC	chromosome passenger complex	18963
query_1	TRUE	0.00088376	20	1915	9	0.00469974	0.45	GO:0045277	GO:CC	respiratory chain complex IV	18963
query_1	TRUE	0.00124507	775	1915	111	0.0579634	0.143226	GO:0099513	GO:CC	polymeric cytoskeletal fiber	18963
query_1	TRUE	0.00136945	4	1915	4	0.00208877	1	GO:0031617	GO:CC	NMS complex	18963
query_1	TRUE	0.00136945	4	1915	4	0.00208877	1	GO:0031262	GO:CC	Ndc80 complex	18963
query_1	TRUE	0.00136945	4	1915	4	0.00208877	1	GO:0000942	GO:CC	condensed nuclear chromosome outer kinetochore	18963
query_1	TRUE	0.00150319	1250	1915	166	0.0866841	0.1328	GO:0140513	GO:CC	nuclear protein-containing complex	18963
query_1	TRUE	0.00150319	305	1915	52	0.027154	0.170492	GO:0030667	GO:CC	secretory granule membrane	18963
query_1	TRUE	0.00150774	87	1915	21	0.0109661	0.241379	GO:0005758	GO:CC	mitochondrial intermembrane space	18963
query_1	TRUE	0.00154671	4071	1915	475	0.248042	0.116679	GO:0031982	GO:CC	vesicle	18963
query_1	TRUE	0.00182455	480	1915	74	0.0386423	0.154167	GO:0005759	GO:CC	mitochondrial matrix	18963
query_1	TRUE	0.00223665	2180	1915	269	0.14047	0.123394	GO:0070062	GO:CC	extracellular exosome	18963
query_1	TRUE	0.0022437	18	1915	8	0.00417755	0.444444	GO:0034719	GO:CC	SMN-Sm protein complex	18963
query_1	TRUE	0.0022437	96	1915	22	0.0114883	0.229167	GO:1905368	GO:CC	peptidase complex	18963
query_1	TRUE	0.00227061	14	1915	7	0.00365535	0.5	GO:1990023	GO:CC	mitotic spindle midzone	18963
query_1	TRUE	0.00227061	14	1915	7	0.00365535	0.5	GO:0034362	GO:CC	low-density lipoprotein particle	18963
query_1	TRUE	0.00275501	23	1915	9	0.00469974	0.391304	GO:0005839	GO:CC	proteasome core complex	18963
query_1	TRUE	0.00397485	24	1915	9	0.00469974	0.375	GO:0005732	GO:CC	sno(s)RNA-containing ribonucleoprotein complex	18963
query_1	TRUE	0.0043206	51	1915	14	0.0073107	0.27451	GO:0005747	GO:CC	mitochondrial respiratory chain complex I	18963
query_1	TRUE	0.0043206	51	1915	14	0.0073107	0.27451	GO:0030964	GO:CC	NADH dehydrogenase complex	18963
query_1	TRUE	0.0043206	51	1915	14	0.0073107	0.27451	GO:0045271	GO:CC	respiratory chain complex I	18963
query_1	TRUE	0.0043206	320	1915	52	0.027154	0.1625	GO:0034774	GO:CC	secretory granule lumen	18963
query_1	TRUE	0.00498701	46	1915	13	0.00678851	0.282609	GO:0009295	GO:CC	nucleoid	18963
query_1	TRUE	0.00498701	46	1915	13	0.00678851	0.282609	GO:0042645	GO:CC	mitochondrial nucleoid	18963
query_1	TRUE	0.00512935	5	1915	4	0.00208877	0.8	GO:0005638	GO:CC	lamin filament	18963
query_1	TRUE	0.00512935	5	1915	4	0.00208877	0.8	GO:0000939	GO:CC	condensed chromosome inner kinetochore	18963
query_1	TRUE	0.00556355	324	1915	52	0.027154	0.160494	GO:0060205	GO:CC	cytoplasmic vesicle lumen	18963
query_1	TRUE	0.00584182	693	1915	97	0.0506527	0.139971	GO:1990904	GO:CC	ribonucleoprotein complex	18963
query_1	TRUE	0.00632478	326	1915	52	0.027154	0.159509	GO:0031983	GO:CC	vesicle lumen	18963
query_1	TRUE	0.00944089	806	1915	109	0.0569191	0.135236	GO:1990234	GO:CC	transferase complex	18963
query_1	TRUE	0.0096617	13	1915	6	0.00313316	0.461538	GO:0005750	GO:CC	mitochondrial respiratory chain complex III	18963
query_1	TRUE	0.0096617	13	1915	6	0.00313316	0.461538	GO:0005885	GO:CC	Arp2/3 protein complex	18963
query_1	TRUE	0.0096617	13	1915	6	0.00313316	0.461538	GO:0008250	GO:CC	oligosaccharyltransferase complex	18963
query_1	TRUE	0.0096617	13	1915	6	0.00313316	0.461538	GO:0045275	GO:CC	respiratory chain complex III	18963
query_1	TRUE	0.0101274	3	1915	3	0.00156658	1	GO:0000811	GO:CC	GINS complex	18963
query_1	TRUE	0.0101274	3	1915	3	0.00156658	1	GO:0097149	GO:CC	centralspindlin complex	18963
query_1	TRUE	0.0128435	6	1915	4	0.00208877	0.666667	GO:0098892	GO:CC	extrinsic component of postsynaptic specialization membrane	18963
query_1	TRUE	0.013825	90	1915	19	0.00992167	0.211111	GO:0035579	GO:CC	specific granule membrane	18963
query_1	TRUE	0.0145318	2266	1915	270	0.140992	0.119153	GO:1903561	GO:CC	extracellular vesicle	18963
query_1	TRUE	0.0147085	14	1915	6	0.00313316	0.428571	GO:0005744	GO:CC	TIM23 mitochondrial import inner membrane translocase complex	18963
query_1	TRUE	0.0150307	2268	1915	270	0.140992	0.119048	GO:0043230	GO:CC	extracellular organelle	18963
query_1	TRUE	0.0155845	105	1915	21	0.0109661	0.2	GO:0048770	GO:CC	pigment granule	18963
query_1	TRUE	0.0155845	10	1915	5	0.00261097	0.5	GO:0005687	GO:CC	U4 snRNP	18963
query_1	TRUE	0.0155845	10	1915	5	0.00261097	0.5	GO:0070938	GO:CC	contractile ring	18963
query_1	TRUE	0.0155845	105	1915	21	0.0109661	0.2	GO:0042470	GO:CC	melanosome	18963
query_1	TRUE	0.0198421	60	1915	14	0.0073107	0.233333	GO:0101003	GO:CC	ficolin-1-rich granule membrane	18963
query_1	TRUE	0.0212155	15	1915	6	0.00313316	0.4	GO:0000800	GO:CC	lateral element	18963
query_1	TRUE	0.0213537	25	1915	8	0.00417755	0.32	GO:0022624	GO:CC	proteasome accessory complex	18963
query_1	TRUE	0.0213547	1326	1915	165	0.0861619	0.124434	GO:0098796	GO:CC	membrane protein complex	18963
query_1	TRUE	0.0215035	4633	1915	519	0.271018	0.112022	GO:0012505	GO:CC	endomembrane system	18963
query_1	TRUE	0.0219268	20	1915	7	0.00365535	0.35	GO:0042575	GO:CC	DNA polymerase complex	18963
query_1	TRUE	0.0236284	55	1915	13	0.00678851	0.236364	GO:1904724	GO:CC	tertiary granule lumen	18963
query_1	TRUE	0.0236284	245	1915	39	0.0203655	0.159184	GO:0005840	GO:CC	ribosome	18963
query_1	TRUE	0.0236284	7	1915	4	0.00208877	0.571429	GO:0005683	GO:CC	U7 snRNP	18963
query_1	TRUE	0.0236284	7	1915	4	0.00208877	0.571429	GO:0031597	GO:CC	cytosolic proteasome complex	18963
query_1	TRUE	0.0236284	9813	1915	1049	0.547781	0.106899	GO:0016020	GO:CC	membrane	18963
query_1	TRUE	0.0236284	7	1915	4	0.00208877	0.571429	GO:0016272	GO:CC	prefoldin complex	18963
query_1	TRUE	0.0237715	11	1915	5	0.00261097	0.454545	GO:0019774	GO:CC	proteasome core complex, beta-subunit complex	18963
query_1	TRUE	0.0237922	843	1915	110	0.0574413	0.130486	GO:0070161	GO:CC	anchoring junction	18963
query_1	TRUE	0.0254854	810	1915	106	0.0553525	0.130864	GO:0012506	GO:CC	vesicle membrane	18963
query_1	TRUE	0.0273995	21	1915	7	0.00365535	0.333333	GO:0034385	GO:CC	triglyceride-rich plasma lipoprotein particle	18963
query_1	TRUE	0.0273995	32	1915	9	0.00469974	0.28125	GO:0046540	GO:CC	U4/U6 x U5 tri-snRNP complex	18963
query_1	TRUE	0.0273995	21	1915	7	0.00365535	0.333333	GO:0034361	GO:CC	very-low-density lipoprotein particle	18963
query_1	TRUE	0.0273995	97	1915	19	0.00992167	0.195876	GO:0034451	GO:CC	centriolar satellite	18963
query_1	TRUE	0.0273995	32	1915	9	0.00469974	0.28125	GO:0097526	GO:CC	spliceosomal tri-snRNP complex	18963
query_1	TRUE	0.0273995	16	1915	6	0.00313316	0.375	GO:0045120	GO:CC	pronucleus	18963
query_1	TRUE	0.0273995	21	1915	7	0.00365535	0.333333	GO:0016327	GO:CC	apicolateral plasma membrane	18963
query_1	TRUE	0.0289814	119	1915	22	0.0114883	0.184874	GO:0015934	GO:CC	large ribosomal subunit	18963
query_1	TRUE	0.0292622	4	1915	3	0.00156658	0.75	GO:0061689	GO:CC	tricellular tight junction	18963
query_1	TRUE	0.0325783	165	1915	28	0.0146214	0.169697	GO:0005875	GO:CC	microtubule associated complex	18963
query_1	TRUE	0.0339864	12	1915	5	0.00261097	0.416667	GO:0005652	GO:CC	nuclear lamina	18963
query_1	TRUE	0.0339864	12	1915	5	0.00261097	0.416667	GO:0034709	GO:CC	methylosome	18963
query_1	TRUE	0.034571	22	1915	7	0.00365535	0.318182	GO:0005838	GO:CC	proteasome regulatory particle	18963
query_1	TRUE	0.0374314	709	1915	93	0.048564	0.131171	GO:0005764	GO:CC	lysosome	18963
query_1	TRUE	0.0374314	709	1915	93	0.048564	0.131171	GO:0000323	GO:CC	lytic vacuole	18963
query_1	TRUE	0.0379146	8	1915	4	0.00208877	0.5	GO:0008541	GO:CC	proteasome regulatory particle, lid subcomplex	18963
query_1	TRUE	0.0379146	8	1915	4	0.00208877	0.5	GO:0000172	GO:CC	ribonuclease MRP complex	18963
query_1	TRUE	0.0379146	28	1915	8	0.00417755	0.285714	GO:0005689	GO:CC	U12-type spliceosomal complex	18963
query_1	TRUE	0.0390467	191	1915	31	0.016188	0.162304	GO:0044391	GO:CC	ribosomal subunit	18963
query_1	TRUE	0.0424682	1014	1915	127	0.0663185	0.125247	GO:0099081	GO:CC	supramolecular polymer	18963
query_1	TRUE	0.0464561	29	1915	8	0.00417755	0.275862	GO:0005763	GO:CC	mitochondrial small ribosomal subunit	18963
query_1	TRUE	0.0464561	13	1915	5	0.00261097	0.384615	GO:0005751	GO:CC	mitochondrial respiratory chain complex IV	18963
query_1	TRUE	0.0464561	13	1915	5	0.00261097	0.384615	GO:0005736	GO:CC	RNA polymerase I complex	18963
query_1	TRUE	0.0464561	54	1915	12	0.00626632	0.222222	GO:0032154	GO:CC	cleavage furrow	18963
query_1	TRUE	0.0464561	29	1915	8	0.00417755	0.275862	GO:0000314	GO:CC	organellar small ribosomal subunit	18963
query_1	TRUE	0.0464561	18	1915	6	0.00313316	0.333333	GO:0005685	GO:CC	U1 snRNP	18963
query_1	TRUE	0.0480812	788	1915	101	0.0527415	0.128173	GO:0030659	GO:CC	cytoplasmic vesicle membrane	18963
query_1	TRUE	0.0480812	61	1915	13	0.00678851	0.213115	GO:0035580	GO:CC	specific granule lumen	18963
query_1	TRUE	0.0485095	762	1915	98	0.0511749	0.128609	GO:0140535	GO:CC	intracellular protein-containing complex	18963
query_1	TRUE	0.0497117	807	1915	103	0.0537859	0.127633	GO:0005773	GO:CC	vacuole	18963
query_1	TRUE	7.70698e-19	14752	1905	1658	0.870341	0.112392	GO:0005515	GO:MF	protein binding	18694
query_1	TRUE	6.11076e-08	209	1905	54	0.0283465	0.258373	GO:0140097	GO:MF	catalytic activity, acting on DNA	18694
query_1	TRUE	6.11076e-08	19	1905	14	0.00734908	0.736842	GO:0017116	GO:MF	single-stranded DNA helicase activity	18694
query_1	TRUE	4.22313e-07	5879	1905	717	0.376378	0.12196	GO:0003824	GO:MF	catalytic activity	18694
query_1	TRUE	1.02775e-06	1504	1905	223	0.11706	0.148271	GO:0005524	GO:MF	ATP binding	18694
query_1	TRUE	1.09774e-06	1850	1905	264	0.138583	0.142703	GO:0035639	GO:MF	purine ribonucleoside triphosphate binding	18694
query_1	TRUE	3.27456e-06	2173	1905	299	0.156955	0.137598	GO:1901265	GO:MF	nucleoside phosphate binding	18694
query_1	TRUE	3.94709e-06	2172	1905	298	0.15643	0.137201	GO:0000166	GO:MF	nucleotide binding	18694
query_1	TRUE	3.94709e-06	2286	1905	311	0.163255	0.136045	GO:0097367	GO:MF	carbohydrate derivative binding	18694
query_1	TRUE	4.19686e-06	17052	1905	1799	0.944357	0.105501	GO:0005488	GO:MF	binding	18694
query_1	TRUE	6.64984e-06	2424	1905	325	0.170604	0.134076	GO:0043168	GO:MF	anion binding	18694
query_1	TRUE	7.31602e-06	1580	1905	226	0.118635	0.143038	GO:0030554	GO:MF	adenyl nucleotide binding	18694
query_1	TRUE	8.47311e-06	1568	1905	224	0.117585	0.142857	GO:0032559	GO:MF	adenyl ribonucleotide binding	18694
query_1	TRUE	8.47311e-06	81	1905	26	0.0136483	0.320988	GO:0003678	GO:MF	DNA helicase activity	18694
query_1	TRUE	8.47311e-06	1935	1905	267	0.140157	0.137984	GO:0017076	GO:MF	purine nucleotide binding	18694
query_1	TRUE	9.19564e-06	1921	1905	265	0.139108	0.137949	GO:0032555	GO:MF	purine ribonucleotide binding	18694
query_1	TRUE	1.07239e-05	2507	1905	332	0.174278	0.132429	GO:0036094	GO:MF	small molecule binding	18694
query_1	TRUE	1.20857e-05	1938	1905	266	0.139633	0.137255	GO:0032553	GO:MF	ribonucleotide binding	18694
query_1	TRUE	2.30829e-05	376	1905	71	0.0372703	0.18883	GO:0015631	GO:MF	tubulin binding	18694
query_1	TRUE	2.32972e-05	272	1905	56	0.0293963	0.205882	GO:0008017	GO:MF	microtubule binding	18694
query_1	TRUE	2.78889e-05	169	1905	40	0.0209974	0.236686	GO:0016853	GO:MF	isomerase activity	18694
query_1	TRUE	5.28069e-05	23	1905	12	0.00629921	0.521739	GO:0003688	GO:MF	DNA replication origin binding	18694
query_1	TRUE	0.000137406	893	1905	135	0.0708661	0.151176	GO:0016462	GO:MF	pyrophosphatase activity	18694
query_1	TRUE	0.000161183	897	1905	135	0.0708661	0.150502	GO:0016818	GO:MF	hydrolase activity, acting on acid anhydrides, in phosphorus-containing anhydrides	18694
query_1	TRUE	0.000161183	897	1905	135	0.0708661	0.150502	GO:0016817	GO:MF	hydrolase activity, acting on acid anhydrides	18694
query_1	TRUE	0.00036131	27	1905	12	0.00629921	0.444444	GO:0016676	GO:MF	oxidoreductase activity, acting on a heme group of donors, oxygen as acceptor	18694
query_1	TRUE	0.00036131	27	1905	12	0.00629921	0.444444	GO:0004129	GO:MF	cytochrome-c oxidase activity	18694
query_1	TRUE	0.00036131	27	1905	12	0.00629921	0.444444	GO:0015002	GO:MF	heme-copper terminal oxidase activity	18694
query_1	TRUE	0.000553923	28	1905	12	0.00629921	0.428571	GO:0016675	GO:MF	oxidoreductase activity, acting on a heme group of donors	18694
query_1	TRUE	0.00073972	110	1905	27	0.0141732	0.245455	GO:0009055	GO:MF	electron transfer activity	18694
query_1	TRUE	0.00073972	167	1905	36	0.0188976	0.215569	GO:0004386	GO:MF	helicase activity	18694
query_1	TRUE	0.00073972	456	1905	76	0.039895	0.166667	GO:0016887	GO:MF	ATPase activity	18694
query_1	TRUE	0.000960441	1866	1905	244	0.128084	0.130761	GO:0019899	GO:MF	enzyme binding	18694
query_1	TRUE	0.00127149	840	1905	123	0.0645669	0.146429	GO:0017111	GO:MF	nucleoside-triphosphatase activity	18694
query_1	TRUE	0.00153507	960	1905	137	0.071916	0.142708	GO:0016772	GO:MF	transferase activity, transferring phosphorus-containing groups	18694
query_1	TRUE	0.00180446	2080	1905	266	0.139633	0.127885	GO:0042802	GO:MF	identical protein binding	18694
query_1	TRUE	0.00212562	47	1905	15	0.00787402	0.319149	GO:0050136	GO:MF	NADH dehydrogenase (quinone) activity	18694
query_1	TRUE	0.00212562	47	1905	15	0.00787402	0.319149	GO:0003954	GO:MF	NADH dehydrogenase activity	18694
query_1	TRUE	0.00212562	47	1905	15	0.00787402	0.319149	GO:0008137	GO:MF	NADH dehydrogenase (ubiquinone) activity	18694
query_1	TRUE	0.0027729	548	1905	85	0.0446194	0.155109	GO:0050839	GO:MF	cell adhesion molecule binding	18694
query_1	TRUE	0.00347314	20	1905	9	0.00472441	0.45	GO:0016018	GO:MF	cyclosporin A binding	18694
query_1	TRUE	0.00440355	50	1905	15	0.00787402	0.3	GO:0003955	GO:MF	NAD(P)H dehydrogenase (quinone) activity	18694
query_1	TRUE	0.00518909	4	1905	4	0.00209974	1	GO:0001730	GO:MF	2'-5'-oligoadenylate synthetase activity	18694
query_1	TRUE	0.00553879	118	1905	26	0.0136483	0.220339	GO:0003697	GO:MF	single-stranded DNA binding	18694
query_1	TRUE	0.00727687	76	1905	19	0.00997375	0.25	GO:0003777	GO:MF	microtubule motor activity	18694
query_1	TRUE	0.00727687	22	1905	9	0.00472441	0.409091	GO:0004529	GO:MF	exodeoxyribonuclease activity	18694
query_1	TRUE	0.00727687	10	1905	6	0.00314961	0.6	GO:0019864	GO:MF	IgG binding	18694
query_1	TRUE	0.00727687	22	1905	9	0.00472441	0.409091	GO:0016895	GO:MF	exodeoxyribonuclease activity, producing 5'-phosphomonoesters	18694
query_1	TRUE	0.0078127	53	1905	15	0.00787402	0.283019	GO:0016860	GO:MF	intramolecular oxidoreductase activity	18694
query_1	TRUE	0.0104361	23	1905	9	0.00472441	0.391304	GO:0004298	GO:MF	threonine-type endopeptidase activity	18694
query_1	TRUE	0.0149525	332	1905	54	0.0283465	0.162651	GO:0045296	GO:MF	cadherin binding	18694
query_1	TRUE	0.0164705	460	1905	70	0.0367454	0.152174	GO:0008509	GO:MF	anion transmembrane transporter activity	18694
query_1	TRUE	0.0166935	995	1905	134	0.0703412	0.134673	GO:0008092	GO:MF	cytoskeletal protein binding	18694
query_1	TRUE	0.0174145	8	1905	5	0.00262467	0.625	GO:0010997	GO:MF	anaphase-promoting complex binding	18694
query_1	TRUE	0.0174145	170	1905	32	0.0167979	0.188235	GO:0003735	GO:MF	structural constituent of ribosome	18694
query_1	TRUE	0.0174145	20	1905	8	0.00419948	0.4	GO:0043138	GO:MF	3'-5' DNA helicase activity	18694
query_1	TRUE	0.0176702	5	1905	4	0.00209974	0.8	GO:0048248	GO:MF	CXCR3 chemokine receptor binding	18694
query_1	TRUE	0.0176702	35	1905	11	0.00577428	0.314286	GO:1904680	GO:MF	peptide transmembrane transporter activity	18694
query_1	TRUE	0.0255723	42	1905	12	0.00629921	0.285714	GO:0001784	GO:MF	phosphotyrosine residue binding	18694
query_1	TRUE	0.0274141	60	1905	15	0.00787402	0.25	GO:0004536	GO:MF	deoxyribonuclease activity	18694
query_1	TRUE	0.0283169	37	1905	11	0.00577428	0.297297	GO:0000217	GO:MF	DNA secondary structure binding	18694
query_1	TRUE	0.03092	32	1905	10	0.00524934	0.3125	GO:0005164	GO:MF	tumor necrosis factor receptor binding	18694
query_1	TRUE	0.03092	55	1905	14	0.00734908	0.254545	GO:0008094	GO:MF	DNA-dependent ATPase activity	18694
query_1	TRUE	0.03092	9	1905	5	0.00262467	0.555556	GO:0003689	GO:MF	DNA clamp loader activity	18694
query_1	TRUE	0.03092	9	1905	5	0.00262467	0.555556	GO:0033170	GO:MF	protein-DNA loading ATPase activity	18694
query_1	TRUE	0.0322715	107	1905	22	0.0115486	0.205607	GO:0016651	GO:MF	oxidoreductase activity, acting on NAD(P)H	18694
query_1	TRUE	0.0336839	803	1905	109	0.0572178	0.135741	GO:0016301	GO:MF	kinase activity	18694
query_1	TRUE	0.0341873	136	1905	26	0.0136483	0.191176	GO:0043021	GO:MF	ribonucleoprotein complex binding	18694
query_1	TRUE	0.0341873	44	1905	12	0.00629921	0.272727	GO:0003755	GO:MF	peptidyl-prolyl cis-trans isomerase activity	18694
query_1	TRUE	0.0341873	62	1905	15	0.00787402	0.241935	GO:0016655	GO:MF	oxidoreductase activity, acting on NAD(P)H, quinone or similar compound as acceptor	18694
query_1	TRUE	0.0341873	56	1905	14	0.00734908	0.25	GO:0042887	GO:MF	amide transmembrane transporter activity	18694
query_1	TRUE	0.0341873	136	1905	26	0.0136483	0.191176	GO:0016779	GO:MF	nucleotidyltransferase activity	18694
query_1	TRUE	0.0376714	6	1905	4	0.00209974	0.666667	GO:0033220	GO:MF	ATPase-coupled amide-transporter activity	18694
query_1	TRUE	0.0376714	6	1905	4	0.00209974	0.666667	GO:0047631	GO:MF	ADP-ribose diphosphatase activity	18694
query_1	TRUE	0.0376714	6	1905	4	0.00209974	0.666667	GO:0023029	GO:MF	MHC class Ib protein binding	18694
query_1	TRUE	0.0408787	70	1905	16	0.00839895	0.228571	GO:0051540	GO:MF	metal cluster binding	18694
query_1	TRUE	0.0408787	70	1905	16	0.00839895	0.228571	GO:0051536	GO:MF	iron-sulfur cluster binding	18694
query_1	TRUE	0.0445745	104	1905	21	0.0110236	0.201923	GO:0051087	GO:MF	chaperone binding	18694
query_1	TRUE	0.0462996	763	1905	103	0.0540682	0.134993	GO:0019900	GO:MF	kinase binding	18694
query_1	TRUE	0.0471841	19	1905	7	0.00367454	0.368421	GO:0004550	GO:MF	nucleoside diphosphate kinase activity	18694
query_1	TRUE	0.0471841	24	1905	8	0.00419948	0.333333	GO:0042910	GO:MF	xenobiotic transmembrane transporter activity	18694
query_1	TRUE	0.0471841	19	1905	7	0.00367454	0.368421	GO:0016864	GO:MF	intramolecular oxidoreductase activity, transposing S-S bonds	18694
query_1	TRUE	0.0471841	19	1905	7	0.00367454	0.368421	GO:0003756	GO:MF	protein disulfide isomerase activity	18694
query_1	TRUE	0.0497937	1282	1905	162	0.0850394	0.126365	GO:0044877	GO:MF	protein-containing complex binding	18694
query_1	TRUE	7.61945e-07	479	512	100	0.195312	0.208768	HP:0011017	HP	Abnormal cellular physiology	4461
query_1	TRUE	7.61945e-07	495	512	102	0.199219	0.206061	HP:0025354	HP	Abnormal cellular phenotype	4461
query_1	TRUE	5.74314e-06	9	512	9	0.0175781	1	HP:0001112	HP	Leber optic atrophy	4461
query_1	TRUE	2.58728e-05	12	512	10	0.0195312	0.833333	HP:0000576	HP	Centrocecal scotoma	4461
query_1	TRUE	2.7784e-05	353	512	75	0.146484	0.212465	HP:0011893	HP	Abnormal leukocyte count	4461
query_1	TRUE	3.13733e-05	526	512	100	0.195312	0.190114	HP:0001903	HP	Anemia	4461
query_1	TRUE	3.13733e-05	527	512	100	0.195312	0.189753	HP:0032251	HP	Abnormal immune system morphology	4461
query_1	TRUE	3.13733e-05	507	512	97	0.189453	0.191321	HP:0001881	HP	Abnormal leukocyte morphology	4461
query_1	TRUE	3.13733e-05	507	512	97	0.189453	0.191321	HP:0010987	HP	Abnormal cellular immune system morphology	4461
query_1	TRUE	6.95256e-05	11	512	9	0.0175781	0.818182	HP:0007768	HP	Central retinal vessel vascular tortuosity	4461
query_1	TRUE	6.95256e-05	11	512	9	0.0175781	0.818182	HP:0000631	HP	Retinal arterial tortuosity	4461
query_1	TRUE	0.000111885	7	512	7	0.0136719	1	HP:0012766	HP	Widened cerebral subarachnoid space	4461
query_1	TRUE	0.000244745	569	512	102	0.199219	0.179262	HP:0001877	HP	Abnormal erythrocyte morphology	4461
query_1	TRUE	0.000244745	18	512	11	0.0214844	0.611111	HP:0001427	HP	Mitochondrial inheritance	4461
query_1	TRUE	0.000244745	49	512	19	0.0371094	0.387755	HP:0003220	HP	Abnormality of chromosome stability	4461
query_1	TRUE	0.000253673	165	512	41	0.0800781	0.248485	HP:0000093	HP	Proteinuria	4461
query_1	TRUE	0.000409195	19	512	11	0.0214844	0.578947	HP:0007763	HP	Retinal telangiectasia	4461
query_1	TRUE	0.000558386	23	512	12	0.0234375	0.521739	HP:0004309	HP	Ventricular preexcitation	4461
query_1	TRUE	0.000682416	178	512	42	0.0820312	0.235955	HP:0020129	HP	Abnormal urine protein level	4461
query_1	TRUE	0.000891511	174	512	41	0.0800781	0.235632	HP:0002031	HP	Abnormal esophagus morphology	4461
query_1	TRUE	0.000965152	32	512	14	0.0273438	0.4375	HP:0007924	HP	Slow decrease in visual acuity	4461
query_1	TRUE	0.00115056	41	512	16	0.03125	0.390244	HP:0012841	HP	Retinal vascular tortuosity	4461
query_1	TRUE	0.00129573	196	512	44	0.0859375	0.22449	HP:0002733	HP	Abnormality of the lymph nodes	4461
query_1	TRUE	0.00129573	25	512	12	0.0234375	0.48	HP:0010469	HP	Absent testis	4461
query_1	TRUE	0.00135642	42	512	16	0.03125	0.380952	HP:0003200	HP	Ragged-red muscle fibers	4461
query_1	TRUE	0.00135642	18	512	10	0.0195312	0.555556	HP:0012429	HP	Aplasia/Hypoplasia of the cerebral white matter	4461
query_1	TRUE	0.00135642	18	512	10	0.0195312	0.555556	HP:0200125	HP	Mitochondrial respiratory chain defects	4461
query_1	TRUE	0.00140094	9	512	7	0.0136719	0.777778	HP:0007327	HP	Mixed demyelinating and axonal polyneuropathy	4461
query_1	TRUE	0.00155849	15	512	9	0.0175781	0.6	HP:0002401	HP	Stroke-like episode	4461
query_1	TRUE	0.00155849	218	512	47	0.0917969	0.215596	HP:0001882	HP	Leukopenia	4461
query_1	TRUE	0.0015605	72	512	22	0.0429688	0.305556	HP:0002575	HP	Tracheoesophageal fistula	4461
query_1	TRUE	0.0015605	187	512	42	0.0820312	0.224599	HP:0002716	HP	Lymphadenopathy	4461
query_1	TRUE	0.00164589	157	512	37	0.0722656	0.235669	HP:0000340	HP	Sloping forehead	4461
query_1	TRUE	0.00221384	1195	512	178	0.347656	0.148954	HP:0001871	HP	Abnormality of blood and blood-forming tissues	4461
query_1	TRUE	0.00230633	23	512	11	0.0214844	0.478261	HP:0005522	HP	Pyridoxine-responsive sideroblastic anemia	4461
query_1	TRUE	0.00234042	54	512	18	0.0351562	0.333333	HP:0003737	HP	Mitochondrial myopathy	4461
query_1	TRUE	0.00234042	136	512	33	0.0644531	0.242647	HP:0040088	HP	Abnormal lymphocyte count	4461
query_1	TRUE	0.00308688	10	512	7	0.0136719	0.7	HP:0005157	HP	Concentric hypertrophic cardiomyopathy	4461
query_1	TRUE	0.00308688	32	512	13	0.0253906	0.40625	HP:0100587	HP	Abnormality of the preputium	4461
query_1	TRUE	0.00317787	207	512	44	0.0859375	0.21256	HP:0000572	HP	Visual loss	4461
query_1	TRUE	0.00317787	28	512	12	0.0234375	0.428571	HP:0100867	HP	Duodenal stenosis	4461
query_1	TRUE	0.00317787	28	512	12	0.0234375	0.428571	HP:0012848	HP	Small intestinal stenosis	4461
query_1	TRUE	0.00408973	17	512	9	0.0175781	0.529412	HP:0007159	HP	Fluctuations in consciousness	4461
query_1	TRUE	0.00408973	242	512	49	0.0957031	0.202479	HP:0001639	HP	Hypertrophic cardiomyopathy	4461
query_1	TRUE	0.00418842	910	512	140	0.273438	0.153846	HP:0001392	HP	Abnormality of the liver	4461
query_1	TRUE	0.00418842	123	512	30	0.0585938	0.243902	HP:0002354	HP	Memory impairment	4461
query_1	TRUE	0.0043395	1102	512	164	0.320312	0.14882	HP:0002012	HP	Abnormality of the abdominal organs	4461
query_1	TRUE	0.0043395	106	512	27	0.0527344	0.254717	HP:0001876	HP	Pancytopenia	4461
query_1	TRUE	0.0043395	154	512	35	0.0683594	0.227273	HP:0004332	HP	Abnormal lymphocyte morphology	4461
query_1	TRUE	0.0043395	25	512	11	0.0214844	0.44	HP:0010293	HP	Aplasia/Hypoplasia of the uvula	4461
query_1	TRUE	0.00561579	11	512	7	0.0136719	0.636364	HP:0003572	HP	Low plasma citrulline	4461
query_1	TRUE	0.00561579	11	512	7	0.0136719	0.636364	HP:0100611	HP	Multiple glomerular cysts	4461
query_1	TRUE	0.00567143	30	512	12	0.0234375	0.4	HP:0100760	HP	Clubbing of toes	4461
query_1	TRUE	0.00617973	26	512	11	0.0214844	0.423077	HP:0000590	HP	Progressive external ophthalmoplegia	4461
query_1	TRUE	0.00659038	35	512	13	0.0253906	0.371429	HP:0002135	HP	Basal ganglia calcification	4461
query_1	TRUE	0.00659038	35	512	13	0.0253906	0.371429	HP:0000408	HP	Progressive sensorineural hearing impairment	4461
query_1	TRUE	0.00806362	15	512	8	0.015625	0.533333	HP:0011990	HP	Abnormality of neutrophil physiology	4461
query_1	TRUE	0.00806362	15	512	8	0.015625	0.533333	HP:0000816	HP	Abnormality of Krebs cycle metabolism	4461
query_1	TRUE	0.00855957	66	512	19	0.0371094	0.287879	HP:0003800	HP	Muscle abnormality related to mitochondrial dysfunction	4461
query_1	TRUE	0.0086818	77	512	21	0.0410156	0.272727	HP:0002246	HP	Abnormal duodenum morphology	4461
query_1	TRUE	0.00886607	19	512	9	0.0175781	0.473684	HP:0001716	HP	Wolff-Parkinson-White syndrome	4461
query_1	TRUE	0.00886607	23	512	10	0.0195312	0.434783	HP:0004389	HP	Intestinal pseudo-obstruction	4461
query_1	TRUE	0.00943136	12	512	7	0.0136719	0.583333	HP:0025268	HP	Stuttering	4461
query_1	TRUE	0.00943136	32	512	12	0.0234375	0.375	HP:0002572	HP	Episodic vomiting	4461
query_1	TRUE	0.00943136	12	512	7	0.0136719	0.583333	HP:0001345	HP	Psychotic mentation	4461
query_1	TRUE	0.00943136	32	512	12	0.0234375	0.375	HP:0000622	HP	Blurred vision	4461
query_1	TRUE	0.00943136	233	512	46	0.0898438	0.197425	HP:0002250	HP	Abnormal large intestine morphology	4461
query_1	TRUE	0.0115569	108	512	26	0.0507812	0.240741	HP:0025454	HP	Abnormal CSF metabolite level	4461
query_1	TRUE	0.0115569	311	512	57	0.111328	0.18328	HP:0010974	HP	Abnormal myeloid leukocyte morphology	4461
query_1	TRUE	0.012433	20	512	9	0.0175781	0.45	HP:0031434	HP	Abnormal speech prosody	4461
query_1	TRUE	0.012433	20	512	9	0.0175781	0.45	HP:0005116	HP	Arterial tortuosity	4461
query_1	TRUE	0.012433	33	512	12	0.0234375	0.363636	HP:0001924	HP	Sideroblastic anemia	4461
query_1	TRUE	0.0138693	43	512	14	0.0273438	0.325581	HP:0001730	HP	Progressive hearing impairment	4461
query_1	TRUE	0.0144782	98	512	24	0.046875	0.244898	HP:0002863	HP	Myelodysplasia	4461
query_1	TRUE	0.0150307	1330	512	188	0.367188	0.141353	HP:0010978	HP	Abnormality of immune system physiology	4461
query_1	TRUE	0.0154745	135	512	30	0.0585938	0.222222	HP:0002778	HP	Abnormal trachea morphology	4461
query_1	TRUE	0.0154745	70	512	19	0.0371094	0.271429	HP:0002381	HP	Aphasia	4461
query_1	TRUE	0.0156219	13	512	7	0.0136719	0.538462	HP:0003648	HP	Lacticaciduria	4461
query_1	TRUE	0.0156219	13	512	7	0.0136719	0.538462	HP:0007067	HP	Distal peripheral sensory neuropathy	4461
query_1	TRUE	0.0159731	76	512	20	0.0390625	0.263158	HP:0001733	HP	Pancreatitis	4461
query_1	TRUE	0.0159731	220	512	43	0.0839844	0.195455	HP:0005372	HP	Abnormality of B cell physiology	4461
query_1	TRUE	0.0162398	44	512	14	0.0273438	0.318182	HP:0000813	HP	Bicornuate uterus	4461
query_1	TRUE	0.0163359	289	512	53	0.103516	0.183391	HP:0001911	HP	Abnormal granulocyte morphology	4461
query_1	TRUE	0.0163521	82	512	21	0.0410156	0.256098	HP:0006501	HP	Aplasia/Hypoplasia of the radius	4461
query_1	TRUE	0.0164631	17	512	8	0.015625	0.470588	HP:0004885	HP	Episodic respiratory distress	4461
query_1	TRUE	0.0164631	248	512	47	0.0917969	0.189516	HP:0001874	HP	Abnormality of neutrophils	4461
query_1	TRUE	0.0164631	17	512	8	0.015625	0.470588	HP:0012707	HP	Elevated brain lactate level by MRS	4461
query_1	TRUE	0.0166663	162	512	34	0.0664062	0.209877	HP:0010972	HP	Anemia of inadequate production	4461
query_1	TRUE	0.0175071	222	512	43	0.0839844	0.193694	HP:0000953	HP	Hyperpigmentation of the skin	4461
query_1	TRUE	0.0175071	55	512	16	0.03125	0.290909	HP:0000544	HP	External ophthalmoplegia	4461
query_1	TRUE	0.0180373	10	512	6	0.0117188	0.6	HP:0011267	HP	Microtia, third degree	4461
query_1	TRUE	0.0180373	157	512	33	0.0644531	0.210191	HP:0012103	HP	Abnormality of the mitochondrion	4461
query_1	TRUE	0.0180373	40	512	13	0.0253906	0.325	HP:0008316	HP	Abnormal mitochondria in muscle tissue	4461
query_1	TRUE	0.0180373	40	512	13	0.0253906	0.325	HP:0007874	HP	Almond-shaped palpebral fissure	4461
query_1	TRUE	0.0180373	50	512	15	0.0292969	0.3	HP:0000630	HP	Abnormal retinal artery morphology	4461
query_1	TRUE	0.0180373	113	512	26	0.0507812	0.230088	HP:0000010	HP	Recurrent urinary tract infections	4461
query_1	TRUE	0.0180373	101	512	24	0.046875	0.237624	HP:0000529	HP	Progressive visual loss	4461
query_1	TRUE	0.0198441	1651	512	225	0.439453	0.136281	HP:0002715	HP	Abnormality of the immune system	4461
query_1	TRUE	0.0199716	90	512	22	0.0429688	0.244444	HP:0002490	HP	Increased CSF lactate	4461
query_1	TRUE	0.0199716	158	512	33	0.0644531	0.208861	HP:0000172	HP	Abnormality of the uvula	4461
query_1	TRUE	0.0199716	90	512	22	0.0429688	0.244444	HP:0030085	HP	Abnormal CSF lactate level	4461
query_1	TRUE	0.020646	133	512	29	0.0566406	0.218045	HP:0003287	HP	Abnormality of mitochondrial metabolism	4461
query_1	TRUE	0.0208276	22	512	9	0.0175781	0.409091	HP:0004948	HP	Vascular tortuosity	4461
query_1	TRUE	0.0211981	14	512	7	0.0136719	0.5	HP:0009939	HP	Mandibular aplasia	4461
query_1	TRUE	0.0211981	14	512	7	0.0136719	0.5	HP:0011965	HP	Abnormal circulating citrulline concentration	4461
query_1	TRUE	0.0214982	219	512	42	0.0820312	0.191781	HP:0010701	HP	Abnormal immunoglobulin level	4461
query_1	TRUE	0.0214982	288	512	52	0.101562	0.180556	HP:0001945	HP	Fever	4461
query_1	TRUE	0.0214982	18	512	8	0.015625	0.444444	HP:0025045	HP	Abnormal brain lactate level by MRS	4461
query_1	TRUE	0.0225032	57	512	16	0.03125	0.280702	HP:0007565	HP	Multiple cafe-au-lait spots	4461
query_1	TRUE	0.0240436	27	512	10	0.0195312	0.37037	HP:0011027	HP	Abnormal fallopian tube morphology	4461
query_1	TRUE	0.0243653	248	512	46	0.0898438	0.185484	HP:0005368	HP	Abnormality of humoral immunity	4461
query_1	TRUE	0.0251371	148	512	31	0.0605469	0.209459	HP:0012145	HP	Abnormality of multiple cell lineages in the bone marrow	4461
query_1	TRUE	0.0254008	716	512	109	0.212891	0.152235	HP:0410042	HP	Abnormal liver morphology	4461
query_1	TRUE	0.0278856	162	512	33	0.0644531	0.203704	HP:0003128	HP	Lactic acidosis	4461
query_1	TRUE	0.0285209	11	512	6	0.0117188	0.545455	HP:0009892	HP	Anotia	4461
query_1	TRUE	0.0308586	483	512	78	0.152344	0.161491	HP:0001637	HP	Abnormal myocardium morphology	4461
query_1	TRUE	0.0309073	48	512	14	0.0273438	0.291667	HP:0000114	HP	Proximal tubulopathy	4461
query_1	TRUE	0.0313447	28	512	10	0.0195312	0.357143	HP:0040012	HP	Chromosome breakage	4461
query_1	TRUE	0.0316314	15	512	7	0.0136719	0.466667	HP:0100027	HP	Recurrent pancreatitis	4461
query_1	TRUE	0.0319886	43	512	13	0.0253906	0.302326	HP:0000751	HP	Personality changes	4461
query_1	TRUE	0.033355	119	512	26	0.0507812	0.218487	HP:0001888	HP	Lymphopenia	4461
query_1	TRUE	0.0334034	5	512	4	0.0078125	0.8	HP:0000371	HP	Acute otitis media	4461
query_1	TRUE	0.0334034	5	512	4	0.0078125	0.8	HP:0200124	HP	Chronic hepatitis due to cryptosporidium infection	4461
query_1	TRUE	0.0334034	5	512	4	0.0078125	0.8	HP:0007041	HP	Chronic lymphocytic meningitis	4461
query_1	TRUE	0.0334444	113	512	25	0.0488281	0.221239	HP:0010783	HP	Erythema	4461
query_1	TRUE	0.0336676	246	512	45	0.0878906	0.182927	HP:0031409	HP	Abnormal lymphocyte physiology	4461
query_1	TRUE	0.0340069	8	512	5	0.00976562	0.625	HP:0004791	HP	Esophageal ulceration	4461
query_1	TRUE	0.035366	139	512	29	0.0566406	0.208633	HP:0002997	HP	Abnormality of the ulna	4461
query_1	TRUE	0.0365316	609	512	94	0.183594	0.154351	HP:0012211	HP	Abnormal renal physiology	4461
query_1	TRUE	0.0369399	206	512	39	0.0761719	0.18932	HP:0100736	HP	Abnormal soft palate morphology	4461
query_1	TRUE	0.0371005	1691	512	227	0.443359	0.13424	HP:0000079	HP	Abnormality of the urinary system	4461
query_1	TRUE	0.0384537	29	512	10	0.0195312	0.344828	HP:0010794	HP	Impaired visuospatial constructive cognition	4461
query_1	TRUE	0.0390556	489	512	78	0.152344	0.159509	HP:0002921	HP	Abnormality of the cerebrospinal fluid	4461
query_1	TRUE	0.0390556	735	512	110	0.214844	0.14966	HP:0002719	HP	Recurrent infections	4461
query_1	TRUE	0.0403678	277	512	49	0.0957031	0.176895	HP:0012732	HP	Anorectal anomaly	4461
query_1	TRUE	0.040448	320	512	55	0.107422	0.171875	HP:0001873	HP	Thrombocytopenia	4461
query_1	TRUE	0.0432703	12	512	6	0.0117188	0.5	HP:0200123	HP	Chronic hepatitis	4461
query_1	TRUE	0.0444043	45	512	13	0.0253906	0.288889	HP:0200005	HP	Abnormal shape of the palpebral fissure	4461
query_1	TRUE	0.0444043	45	512	13	0.0253906	0.288889	HP:0025615	HP	Abscess	4461
query_1	TRUE	0.0447293	56	512	15	0.0292969	0.267857	HP:0001138	HP	Optic neuropathy	4461
query_1	TRUE	0.0468867	62	512	16	0.03125	0.258065	HP:0006495	HP	Aplasia/Hypoplasia of the ulna	4461
query_1	TRUE	0.0468867	62	512	16	0.03125	0.258065	HP:3000036	HP	Abnormality of head blood vessel	4461
query_1	TRUE	0.0468867	337	512	57	0.111328	0.169139	HP:0011873	HP	Abnormal platelet count	4461
query_1	TRUE	0.0477027	136	512	28	0.0546875	0.205882	HP:0012091	HP	Abnormality of pancreas physiology	4461
query_1	TRUE	0.048268	51	512	14	0.0273438	0.27451	HP:0002174	HP	Postural tremor	4461
query_1	TRUE	0.0489538	916	512	132	0.257812	0.144105	HP:0011277	HP	Abnormality of the urinary system physiology	4461
query_1	TRUE	1.56417e-28	7557	1261	1065	0.844568	0.140929	HPA:0600000	HPA	tonsil	10596
query_1	TRUE	1.81413e-28	6333	1261	937	0.743061	0.147955	HPA:0310000	HPA	lymph node	10596
query_1	TRUE	8.31295e-26	5908	1261	881	0.698652	0.14912	HPA:0600441	HPA	tonsil; non-germinal center cells[‚â•Low]	10596
query_1	TRUE	8.54437e-25	5871	1261	873	0.692308	0.148697	HPA:0310441	HPA	lymph node; non-germinal center cells[‚â•Low]	10596
query_1	TRUE	2.38922e-22	7514	1261	1041	0.825535	0.138541	HPA:0030000	HPA	appendix	10596
query_1	TRUE	1.98185e-20	5795	1261	848	0.672482	0.146333	HPA:0600431	HPA	tonsil; germinal center cells[‚â•Low]	10596
query_1	TRUE	5.24093e-19	4927	1261	741	0.587629	0.150396	HPA:0310431	HPA	lymph node; germinal center cells[‚â•Low]	10596
query_1	TRUE	1.43334e-18	4241	1261	656	0.520222	0.15468	HPA:0530721	HPA	spleen; cells in white pulp[‚â•Low]	10596
query_1	TRUE	2.0489e-16	5716	1261	822	0.651864	0.143807	HPA:0530000	HPA	spleen	10596
query_1	TRUE	1.59005e-15	3962	1261	608	0.482157	0.153458	HPA:0600432	HPA	tonsil; germinal center cells[‚â•Medium]	10596
query_1	TRUE	3.7742e-15	6556	1261	911	0.722443	0.138957	HPA:0470681	HPA	skin 2; epidermal cells[‚â•Low]	10596
query_1	TRUE	3.7742e-15	6556	1261	911	0.722443	0.138957	HPA:0470000	HPA	skin 2	10596
query_1	TRUE	1.38588e-14	3848	1261	589	0.46709	0.153067	HPA:0310442	HPA	lymph node; non-germinal center cells[‚â•Medium]	10596
query_1	TRUE	1.50003e-14	3210	1261	508	0.402855	0.158255	HPA:0310432	HPA	lymph node; germinal center cells[‚â•Medium]	10596
query_1	TRUE	1.55061e-14	6290	1261	878	0.696273	0.139587	HPA:0040000	HPA	bone marrow	10596
query_1	TRUE	1.55061e-14	6290	1261	878	0.696273	0.139587	HPA:0040081	HPA	bone marrow; hematopoietic cells[‚â•Low]	10596
query_1	TRUE	2.24698e-14	4952	1261	722	0.572561	0.1458	HPA:0030071	HPA	appendix; lymphoid tissue[‚â•Low]	10596
query_1	TRUE	3.37923e-14	4038	1261	610	0.483743	0.151065	HPA:0600442	HPA	tonsil; non-germinal center cells[‚â•Medium]	10596
query_1	TRUE	3.37923e-14	7083	1261	964	0.764473	0.136101	HPA:0030051	HPA	appendix; glandular cells[‚â•Low]	10596
query_1	TRUE	1.14319e-13	6482	1261	895	0.709754	0.138075	HPA:0190000	HPA	esophagus	10596
query_1	TRUE	1.14319e-13	6482	1261	895	0.709754	0.138075	HPA:0600221	HPA	tonsil; squamous epithelial cells[‚â•Low]	10596
query_1	TRUE	1.14319e-13	6482	1261	895	0.709754	0.138075	HPA:0190221	HPA	esophagus; squamous epithelial cells[‚â•Low]	10596
query_1	TRUE	2.55982e-13	7550	1261	1010	0.800952	0.133775	HPA:0150051	HPA	duodenum; glandular cells[‚â•Low]	10596
query_1	TRUE	2.55982e-13	7550	1261	1010	0.800952	0.133775	HPA:0150000	HPA	duodenum	10596
query_1	TRUE	2.66261e-13	7124	1261	964	0.764473	0.135317	HPA:0300000	HPA	lung	10596
query_1	TRUE	3.08114e-13	6718	1261	919	0.728787	0.136797	HPA:0110000	HPA	cervix, uterine	10596
query_1	TRUE	3.27384e-13	7360	1261	989	0.784298	0.134375	HPA:0130051	HPA	colon; glandular cells[‚â•Low]	10596
query_1	TRUE	2.5943e-12	4104	1261	608	0.482157	0.148148	HPA:0040082	HPA	bone marrow; hematopoietic cells[‚â•Medium]	10596
query_1	TRUE	3.46111e-12	7441	1261	993	0.78747	0.13345	HPA:0400000	HPA	rectum	10596
query_1	TRUE	3.46111e-12	7441	1261	993	0.78747	0.13345	HPA:0400051	HPA	rectum; glandular cells[‚â•Low]	10596
query_1	TRUE	2.10658e-11	7383	1261	983	0.77954	0.133144	HPA:0550000	HPA	stomach 2	10596
query_1	TRUE	2.10658e-11	7383	1261	983	0.77954	0.133144	HPA:0550051	HPA	stomach 2; glandular cells[‚â•Low]	10596
query_1	TRUE	3.42444e-11	6428	1261	876	0.694687	0.136279	HPA:0150052	HPA	duodenum; glandular cells[‚â•Medium]	10596
query_1	TRUE	3.49584e-11	7192	1261	961	0.762094	0.133621	HPA:0380000	HPA	placenta	10596
query_1	TRUE	3.91486e-11	6627	1261	898	0.712133	0.135506	HPA:0300411	HPA	lung; macrophages[‚â•Low]	10596
query_1	TRUE	4.09592e-11	6074	1261	835	0.662173	0.137471	HPA:0330000	HPA	oral mucosa	10596
query_1	TRUE	4.09592e-11	6074	1261	835	0.662173	0.137471	HPA:0330221	HPA	oral mucosa; squamous epithelial cells[‚â•Low]	10596
query_1	TRUE	4.90065e-11	7092	1261	949	0.752577	0.133813	HPA:0610000	HPA	urinary bladder	10596
query_1	TRUE	4.90065e-11	7092	1261	949	0.752577	0.133813	HPA:0610831	HPA	urinary bladder; urothelial cells[‚â•Low]	10596
query_1	TRUE	5.66122e-11	5156	1261	727	0.576527	0.141001	HPA:0530711	HPA	spleen; cells in red pulp[‚â•Low]	10596
[truncated: 1,682 more rows]

## Sheet: Module2_UpInTumor_OPOSSUM
TF	JASPAR ID	Class	Family	Tax Group	IC	GC Content	Target gene hits	Target gene non-hits	Background gene hits	Background gene non-hits	Target TFBS hits	Target TFBS nucleotide rate	Background TFBS hits	Background TFBS nucleotide rate	Z-score	Fisher score
[truncated: 38 more rows]
