# Supplementary material for: Analysis of matched primary and recurrent BRCA1/2 mutation-associated tumors identifies recurrence-specific drivers
Source: Research Square preprint supplement (doi:10.21203/rs.3.rs-745248/v1), 2021-08-30
Supplement: Supplementary file 15 [file fed33891ebeb19512fcd188d.xlsx]

## Sheet: TCGABreast_gBRCA
TCGA Tumor	Tumor Type	Tumor Group	Build of tumor + germline bam	Germline mutation gene	Germline mutation
TCGA-A1-A0SH-01A	Breast	gBRCA1/2	GRCh38	BRCA1	c.T181G:p.C61G
TCGA-A2-A0D2-01A	Breast	gBRCA1/2	GRCh38	BRCA1	c.5137delG:p.V1713X
TCGA-A2-A0T0-01A	Breast	gBRCA1/2	GRCh38	BRCA2	c.6942_6945del:p.T2314fs
TCGA-A2-A25E-01A	Breast	gBRCA1/2	GRCh38	BRCA2	c.C9294G:p.Y3098X
TCGA-A7-A4SE-01A	Breast	gBRCA1/2	GRCh38	BRCA1	c.G1054T:p.E352X
TCGA-A8-A097-01A	Breast	gBRCA1/2	GRCh38	BRCA2	c.657_658del:p.T219fs
TCGA-A8-A09A-01A	Breast	gBRCA1/2	GRCh38	BRCA2	c.G5857T:p.E1953X
TCGA-A8-A09W-01A	Breast	gBRCA1/2	GRCh38	BRCA2	c.G4552T:p.E1518X
TCGA-AC-A3BB-01A	Breast	gBRCA1/2	GRCh38	BRCA2	c.657_658del:p.T219fs
TCGA-AN-A0AL-01A	Breast	gBRCA1/2	GRCh38	BRCA1	c.5265dupC:p.Q1756fs
TCGA-AN-A0FL-01A	Breast	gBRCA1/2	GRCh38	BRCA1	c.4035delA:p.E1345fs
TCGA-AN-A0FX-01A	Breast	gBRCA1/2	GRCh38	BRCA1	c.C3967T:p.Q1323X
TCGA-AO-A03V-01A	Breast	gBRCA1/2	GRCh38	BRCA2	c.5946delT:p.S1982fs
TCGA-AO-A124-01A	Breast	gBRCA1/2	GRCh38	BRCA1	c.68_69del:p.E23fs
TCGA-AR-A1AM-01A	Breast	gBRCA1/2	GRCh38	BRCA1	c.4065_4068del:p.N1355fs
TCGA-AR-A24Q-01A	Breast	gBRCA1/2	GRCh38	BRCA1	c.923delG:p.S308fs
TCGA-AR-A2LN-01A	Breast	gBRCA1/2	GRCh38	BRCA2	c.8533_8534del:p.R2845fs
TCGA-B6-A0RG-01A	Breast	gBRCA1/2	GRCh38	BRCA2	c.5345_5346del:p.Q1782fs
TCGA-BH-A0AZ-01A	Breast	gBRCA1/2	GRCh38	BRCA2	c.C5864A:p.S1955X
TCGA-BH-A0B4-01A	Breast	gBRCA1/2	GRCh38	BRCA2	c.8203dupC:p.P2735fs
TCGA-BH-A1FN-01A	Breast	gBRCA1/2	GRCh38	BRCA2	c.2806_2809del:p.K936fs
TCGA-C8-A12K-01A	Breast	gBRCA1/2	GRCh38	BRCA1	c.C5095T:p.R1699W
TCGA-D8-A147-01A	Breast	gBRCA1/2	GRCh38	BRCA1	c.T181G:p.C61G
TCGA-D8-A1JD-01A	Breast	gBRCA1/2	GRCh38	BRCA2	c.6847delC:p.P2283fs
TCGA-E2-A14Z-01A	Breast	gBRCA1/2	GRCh38	BRCA1	c.594-2A>C
TCGA-E2-A15S-01A	Breast	gBRCA1/2	GRCh38	BRCA2	c.1262delA:p.Q421fs
TCGA-E9-A1NE-01A	Breast	gBRCA1/2	GRCh38	BRCA2	c.3975_3976insTGCT:p.T1325fs
TCGA-E9-A22E-01A	Breast	gBRCA1/2	GRCh38	BRCA1	c.5265dupC:p.Q1756fs
TCGA-E9-A22G-01A	Breast	gBRCA1/2	GRCh38	BRCA1	c.5265dupC:p.Q1756fs
TCGA-E9-A244-01A	Breast	gBRCA1/2	GRCh38	BRCA1	c.4035delA:p.E1345fs
TCGA-E9-A3QA-01A	Breast	gBRCA1/2	GRCh38	BRCA1	c.5265dupC:p.Q1756fs
TCGA-EW-A1P4-01A	Breast	gBRCA1/2	GRCh38	BRCA1	c.1881_1884del:p.V627fs
TCGA-EW-A1P7-01A	Breast	gBRCA1/2	GRCh38	BRCA2	c.6482_6485del:p.D2161fs
TCGA-EW-A1PD-01A	Breast	gBRCA1/2	GRCh38	BRCA2	c.767_771del:p.T256fs
TCGA-HN-A2NL-01A	Breast	gBRCA1/2	GRCh38	BRCA2	c.6642delT:p.T2214fs
TCGA-BH-A0BZ-01A	Breast	gBRCA1/2	GRCh37	BRCA2	c.9089insA:p.T3030fs
TCGA-E2-A14N-01A	Breast	gBRCA1/2	GRCh37	BRCA1	c.328dupA:p.K110fs

## Sheet: TCGABreast_HR-WT
TCGA Tumor	Tumor Type	Tumor Group	Build of tumor + germline bam	gBRCA1/2 mutation	Somatic BRCA1/2 loss	Germline or somatic mutation in HR gene
TCGA-A1-A0SD-01A	Breast	HR-WT	GRCh38	FALSE	FALSE	FALSE
TCGA-A1-A0SE-01A	Breast	HR-WT	GRCh38	FALSE	FALSE	FALSE
TCGA-A1-A0SF-01A	Breast	HR-WT	GRCh38	FALSE	FALSE	FALSE
TCGA-A1-A0SJ-01A	Breast	HR-WT	GRCh38	FALSE	FALSE	FALSE
TCGA-A1-A0SM-01A	Breast	HR-WT	GRCh38	FALSE	FALSE	FALSE
TCGA-A1-A0SN-01A	Breast	HR-WT	GRCh38	FALSE	FALSE	FALSE
TCGA-A1-A0SP-01A	Breast	HR-WT	GRCh38	FALSE	FALSE	FALSE
TCGA-A1-A0SQ-01A	Breast	HR-WT	GRCh38	FALSE	FALSE	FALSE
TCGA-A2-A04N-01A	Breast	HR-WT	GRCh38	FALSE	FALSE	FALSE
TCGA-A2-A04Q-01A	Breast	HR-WT	GRCh38	FALSE	FALSE	FALSE
TCGA-A2-A04U-01A	Breast	HR-WT	GRCh38	FALSE	FALSE	FALSE
TCGA-A2-A04V-01A	Breast	HR-WT	GRCh38	FALSE	FALSE	FALSE
TCGA-A2-A04W-01A	Breast	HR-WT	GRCh38	FALSE	FALSE	FALSE
TCGA-A2-A04X-01A	Breast	HR-WT	GRCh38	FALSE	FALSE	FALSE
TCGA-A2-A04Y-01A	Breast	HR-WT	GRCh38	FALSE	FALSE	FALSE
TCGA-A2-A0CK-01A	Breast	HR-WT	GRCh38	FALSE	FALSE	FALSE
TCGA-A2-A0CL-01A	Breast	HR-WT	GRCh38	FALSE	FALSE	FALSE
TCGA-A2-A0CM-01A	Breast	HR-WT	GRCh38	FALSE	FALSE	FALSE
TCGA-A2-A0CO-01A	Breast	HR-WT	GRCh38	FALSE	FALSE	FALSE
TCGA-A2-A0CQ-01A	Breast	HR-WT	GRCh38	FALSE	FALSE	FALSE
TCGA-A2-A0CR-01A	Breast	HR-WT	GRCh38	FALSE	FALSE	FALSE
TCGA-A2-A0CS-01A	Breast	HR-WT	GRCh38	FALSE	FALSE	FALSE
TCGA-A2-A0CT-01A	Breast	HR-WT	GRCh38	FALSE	FALSE	FALSE
TCGA-A2-A0CU-01A	Breast	HR-WT	GRCh38	FALSE	FALSE	FALSE
TCGA-A2-A0CV-01A	Breast	HR-WT	GRCh38	FALSE	FALSE	FALSE
TCGA-A2-A0CW-01A	Breast	HR-WT	GRCh38	FALSE	FALSE	FALSE
TCGA-A2-A0CX-01A	Breast	HR-WT	GRCh38	FALSE	FALSE	FALSE
TCGA-A2-A0D0-01A	Breast	HR-WT	GRCh38	FALSE	FALSE	FALSE
TCGA-A2-A0D1-01A	Breast	HR-WT	GRCh38	FALSE	FALSE	FALSE
TCGA-A2-A0D3-01A	Breast	HR-WT	GRCh38	FALSE	FALSE	FALSE
TCGA-A2-A0D4-01A	Breast	HR-WT	GRCh38	FALSE	FALSE	FALSE
TCGA-A2-A0EM-01A	Breast	HR-WT	GRCh38	FALSE	FALSE	FALSE
TCGA-A2-A0EN-01A	Breast	HR-WT	GRCh38	FALSE	FALSE	FALSE
TCGA-A2-A0EO-01A	Breast	HR-WT	GRCh38	FALSE	FALSE	FALSE
TCGA-A2-A0EP-01A	Breast	HR-WT	GRCh38	FALSE	FALSE	FALSE
TCGA-A2-A0EQ-01A	Breast	HR-WT	GRCh38	FALSE	FALSE	FALSE
TCGA-A2-A0ER-01A	Breast	HR-WT	GRCh38	FALSE	FALSE	FALSE
TCGA-A2-A0ES-01A	Breast	HR-WT	GRCh38	FALSE	FALSE	FALSE
TCGA-A2-A0EU-01A	Breast	HR-WT	GRCh38	FALSE	FALSE	FALSE
TCGA-A2-A0EV-01A	Breast	HR-WT	GRCh38	FALSE	FALSE	FALSE
TCGA-A2-A0EW-01A	Breast	HR-WT	GRCh38	FALSE	FALSE	FALSE
TCGA-A2-A0EX-01A	Breast	HR-WT	GRCh38	FALSE	FALSE	FALSE
TCGA-A2-A0EY-01A	Breast	HR-WT	GRCh38	FALSE	FALSE	FALSE
TCGA-A2-A0SV-01A	Breast	HR-WT	GRCh38	FALSE	FALSE	FALSE
TCGA-A2-A0SX-01A	Breast	HR-WT	GRCh38	FALSE	FALSE	FALSE
TCGA-A2-A0SY-01A	Breast	HR-WT	GRCh38	FALSE	FALSE	FALSE
TCGA-A2-A0T1-01A	Breast	HR-WT	GRCh38	FALSE	FALSE	FALSE
TCGA-A2-A0T3-01A	Breast	HR-WT	GRCh38	FALSE	FALSE	FALSE
TCGA-A2-A0T4-01A	Breast	HR-WT	GRCh38	FALSE	FALSE	FALSE
TCGA-A2-A0T5-01A	Breast	HR-WT	GRCh38	FALSE	FALSE	FALSE
TCGA-A2-A0YC-01A	Breast	HR-WT	GRCh38	FALSE	FALSE	FALSE
TCGA-A2-A0YD-01A	Breast	HR-WT	GRCh38	FALSE	FALSE	FALSE
TCGA-A2-A0YE-01A	Breast	HR-WT	GRCh38	FALSE	FALSE	FALSE
TCGA-A2-A0YF-01A	Breast	HR-WT	GRCh38	FALSE	FALSE	FALSE
TCGA-A2-A0YG-01A	Breast	HR-WT	GRCh38	FALSE	FALSE	FALSE
TCGA-A2-A0YH-01A	Breast	HR-WT	GRCh38	FALSE	FALSE	FALSE
TCGA-A2-A0YI-01A	Breast	HR-WT	GRCh38	FALSE	FALSE	FALSE
TCGA-A2-A0YJ-01A	Breast	HR-WT	GRCh38	FALSE	FALSE	FALSE
TCGA-A2-A0YK-01A	Breast	HR-WT	GRCh38	FALSE	FALSE	FALSE
TCGA-A2-A0YL-01A	Breast	HR-WT	GRCh38	FALSE	FALSE	FALSE
TCGA-A2-A0YM-01A	Breast	HR-WT	GRCh38	FALSE	FALSE	FALSE
TCGA-A2-A0YT-01A	Breast	HR-WT	GRCh38	FALSE	FALSE	FALSE
TCGA-A2-A1FV-01A	Breast	HR-WT	GRCh38	FALSE	FALSE	FALSE
TCGA-A2-A1FW-01A	Breast	HR-WT	GRCh38	FALSE	FALSE	FALSE
TCGA-A2-A1FX-01A	Breast	HR-WT	GRCh38	FALSE	FALSE	FALSE
TCGA-A2-A1FZ-01A	Breast	HR-WT	GRCh38	FALSE	FALSE	FALSE
TCGA-A2-A1G0-01A	Breast	HR-WT	GRCh38	FALSE	FALSE	FALSE
TCGA-A2-A1G1-01A	Breast	HR-WT	GRCh38	FALSE	FALSE	FALSE
TCGA-A2-A1G4-01A	Breast	HR-WT	GRCh38	FALSE	FALSE	FALSE
TCGA-A2-A25C-01A	Breast	HR-WT	GRCh38	FALSE	FALSE	FALSE
TCGA-A2-A25F-01A	Breast	HR-WT	GRCh38	FALSE	FALSE	FALSE
TCGA-A2-A3KD-01A	Breast	HR-WT	GRCh38	FALSE	FALSE	FALSE
TCGA-A2-A3XS-01A	Breast	HR-WT	GRCh38	FALSE	FALSE	FALSE
TCGA-A2-A3XT-01A	Breast	HR-WT	GRCh38	FALSE	FALSE	FALSE
TCGA-A2-A3XU-01A	Breast	HR-WT	GRCh38	FALSE	FALSE	FALSE
TCGA-A2-A3XV-01A	Breast	HR-WT	GRCh38	FALSE	FALSE	FALSE
TCGA-A2-A3XW-01A	Breast	HR-WT	GRCh38	FALSE	FALSE	FALSE
TCGA-A2-A3XX-01A	Breast	HR-WT	GRCh38	FALSE	FALSE	FALSE
TCGA-A2-A3XY-01A	Breast	HR-WT	GRCh38	FALSE	FALSE	FALSE
TCGA-A2-A3XZ-01A	Breast	HR-WT	GRCh38	FALSE	FALSE	FALSE
TCGA-A2-A4RX-01A	Breast	HR-WT	GRCh38	FALSE	FALSE	FALSE
TCGA-A2-A4RY-01A	Breast	HR-WT	GRCh38	FALSE	FALSE	FALSE
TCGA-A2-A4S0-01A	Breast	HR-WT	GRCh38	FALSE	FALSE	FALSE
TCGA-A2-A4S1-01A	Breast	HR-WT	GRCh38	FALSE	FALSE	FALSE
TCGA-A2-A4S3-01A	Breast	HR-WT	GRCh38	FALSE	FALSE	FALSE
TCGA-A7-A0CD-01A	Breast	HR-WT	GRCh38	FALSE	FALSE	FALSE
TCGA-A7-A0CG-01A	Breast	HR-WT	GRCh38	FALSE	FALSE	FALSE
TCGA-A7-A0D9-01A	Breast	HR-WT	GRCh38	FALSE	FALSE	FALSE
TCGA-A7-A13D-01B	Breast	HR-WT	GRCh38	FALSE	FALSE	FALSE
TCGA-A7-A13G-01A	Breast	HR-WT	GRCh38	FALSE	FALSE	FALSE
TCGA-A7-A13H-01A	Breast	HR-WT	GRCh38	FALSE	FALSE	FALSE
TCGA-A7-A26E-01A	Breast	HR-WT	GRCh38	FALSE	FALSE	FALSE
TCGA-A7-A26F-01A	Breast	HR-WT	GRCh38	FALSE	FALSE	FALSE
TCGA-A7-A26G-01A	Breast	HR-WT	GRCh38	FALSE	FALSE	FALSE
TCGA-A7-A26I-01A	Breast	HR-WT	GRCh38	FALSE	FALSE	FALSE
TCGA-A7-A26J-01A	Breast	HR-WT	GRCh38	FALSE	FALSE	FALSE
TCGA-A7-A2KD-01A	Breast	HR-WT	GRCh38	FALSE	FALSE	FALSE
TCGA-A7-A3IY-01A	Breast	HR-WT	GRCh38	FALSE	FALSE	FALSE
TCGA-A7-A3IZ-01A	Breast	HR-WT	GRCh38	FALSE	FALSE	FALSE
TCGA-A7-A3J0-01A	Breast	HR-WT	GRCh38	FALSE	FALSE	FALSE
TCGA-A7-A3J1-01A	Breast	HR-WT	GRCh38	FALSE	FALSE	FALSE
TCGA-A7-A425-01A	Breast	HR-WT	GRCh38	FALSE	FALSE	FALSE
TCGA-A7-A426-01A	Breast	HR-WT	GRCh38	FALSE	FALSE	FALSE
TCGA-A7-A4SA-01A	Breast	HR-WT	GRCh38	FALSE	FALSE	FALSE
TCGA-A7-A4SD-01A	Breast	HR-WT	GRCh38	FALSE	FALSE	FALSE
TCGA-A7-A4SF-01A	Breast	HR-WT	GRCh38	FALSE	FALSE	FALSE
TCGA-A7-A5ZX-01A	Breast	HR-WT	GRCh38	FALSE	FALSE	FALSE
TCGA-A8-A06O-01A	Breast	HR-WT	GRCh38	FALSE	FALSE	FALSE
TCGA-A8-A06P-01A	Breast	HR-WT	GRCh38	FALSE	FALSE	FALSE
TCGA-A8-A06Q-01A	Breast	HR-WT	GRCh38	FALSE	FALSE	FALSE
TCGA-A8-A06T-01A	Breast	HR-WT	GRCh38	FALSE	FALSE	FALSE
TCGA-A8-A06U-01A	Breast	HR-WT	GRCh38	FALSE	FALSE	FALSE
TCGA-A8-A06Z-01A	Breast	HR-WT	GRCh38	FALSE	FALSE	FALSE
TCGA-A8-A075-01A	Breast	HR-WT	GRCh38	FALSE	FALSE	FALSE
TCGA-A8-A076-01A	Breast	HR-WT	GRCh38	FALSE	FALSE	FALSE
TCGA-A8-A07B-01A	Breast	HR-WT	GRCh38	FALSE	FALSE	FALSE
TCGA-A8-A07F-01A	Breast	HR-WT	GRCh38	FALSE	FALSE	FALSE
TCGA-A8-A07G-01A	Breast	HR-WT	GRCh38	FALSE	FALSE	FALSE
TCGA-A8-A07I-01A	Breast	HR-WT	GRCh38	FALSE	FALSE	FALSE
TCGA-A8-A07J-01A	Breast	HR-WT	GRCh38	FALSE	FALSE	FALSE
TCGA-A8-A07O-01A	Breast	HR-WT	GRCh38	FALSE	FALSE	FALSE
TCGA-A8-A07W-01A	Breast	HR-WT	GRCh38	FALSE	FALSE	FALSE
TCGA-A8-A07Z-01A	Breast	HR-WT	GRCh38	FALSE	FALSE	FALSE
TCGA-A8-A081-01A	Breast	HR-WT	GRCh38	FALSE	FALSE	FALSE
TCGA-A8-A08B-01A	Breast	HR-WT	GRCh38	FALSE	FALSE	FALSE
TCGA-A8-A08C-01A	Breast	HR-WT	GRCh38	FALSE	FALSE	FALSE
TCGA-A8-A08F-01A	Breast	HR-WT	GRCh38	FALSE	FALSE	FALSE
TCGA-A8-A08G-01A	Breast	HR-WT	GRCh38	FALSE	FALSE	FALSE
TCGA-A8-A08H-01A	Breast	HR-WT	GRCh38	FALSE	FALSE	FALSE
TCGA-A8-A08O-01A	Breast	HR-WT	GRCh38	FALSE	FALSE	FALSE
TCGA-A8-A08S-01A	Breast	HR-WT	GRCh38	FALSE	FALSE	FALSE
TCGA-A8-A08T-01A	Breast	HR-WT	GRCh38	FALSE	FALSE	FALSE
TCGA-A8-A08X-01A	Breast	HR-WT	GRCh38	FALSE	FALSE	FALSE
TCGA-A8-A08Z-01A	Breast	HR-WT	GRCh38	FALSE	FALSE	FALSE
TCGA-A8-A090-01A	Breast	HR-WT	GRCh38	FALSE	FALSE	FALSE
TCGA-A8-A091-01A	Breast	HR-WT	GRCh38	FALSE	FALSE	FALSE
TCGA-A8-A092-01A	Breast	HR-WT	GRCh38	FALSE	FALSE	FALSE
TCGA-A8-A093-01A	Breast	HR-WT	GRCh38	FALSE	FALSE	FALSE
TCGA-A8-A094-01A	Breast	HR-WT	GRCh38	FALSE	FALSE	FALSE
TCGA-A8-A095-01A	Breast	HR-WT	GRCh38	FALSE	FALSE	FALSE
TCGA-A8-A096-01A	Breast	HR-WT	GRCh38	FALSE	FALSE	FALSE
TCGA-A8-A099-01A	Breast	HR-WT	GRCh38	FALSE	FALSE	FALSE
TCGA-A8-A09C-01A	Breast	HR-WT	GRCh38	FALSE	FALSE	FALSE
TCGA-A8-A09D-01A	Breast	HR-WT	GRCh38	FALSE	FALSE	FALSE
TCGA-A8-A09E-01A	Breast	HR-WT	GRCh38	FALSE	FALSE	FALSE
TCGA-A8-A09G-01A	Breast	HR-WT	GRCh38	FALSE	FALSE	FALSE
TCGA-A8-A09I-01A	Breast	HR-WT	GRCh38	FALSE	FALSE	FALSE
TCGA-A8-A09K-01A	Breast	HR-WT	GRCh38	FALSE	FALSE	FALSE
TCGA-A8-A09Q-01A	Breast	HR-WT	GRCh38	FALSE	FALSE	FALSE
TCGA-A8-A09T-01A	Breast	HR-WT	GRCh38	FALSE	FALSE	FALSE
TCGA-A8-A09X-01A	Breast	HR-WT	GRCh38	FALSE	FALSE	FALSE
TCGA-A8-A09Z-01A	Breast	HR-WT	GRCh38	FALSE	FALSE	FALSE
TCGA-A8-A0A1-01A	Breast	HR-WT	GRCh38	FALSE	FALSE	FALSE
TCGA-A8-A0A2-01A	Breast	HR-WT	GRCh38	FALSE	FALSE	FALSE
TCGA-A8-A0A4-01A	Breast	HR-WT	GRCh38	FALSE	FALSE	FALSE
TCGA-A8-A0A6-01A	Breast	HR-WT	GRCh38	FALSE	FALSE	FALSE
TCGA-A8-A0A7-01A	Breast	HR-WT	GRCh38	FALSE	FALSE	FALSE
TCGA-A8-A0A9-01A	Breast	HR-WT	GRCh38	FALSE	FALSE	FALSE
TCGA-A8-A0AB-01A	Breast	HR-WT	GRCh38	FALSE	FALSE	FALSE
TCGA-A8-A0AD-01A	Breast	HR-WT	GRCh38	FALSE	FALSE	FALSE
TCGA-AC-A23E-01A	Breast	HR-WT	GRCh38	FALSE	FALSE	FALSE
TCGA-AC-A23G-01A	Breast	HR-WT	GRCh38	FALSE	FALSE	FALSE
TCGA-AC-A2B8-01A	Breast	HR-WT	GRCh38	FALSE	FALSE	FALSE
TCGA-AC-A2BK-01A	Breast	HR-WT	GRCh38	FALSE	FALSE	FALSE
TCGA-AC-A2BM-01A	Breast	HR-WT	GRCh38	FALSE	FALSE	FALSE
TCGA-AC-A2FB-01A	Breast	HR-WT	GRCh38	FALSE	FALSE	FALSE
TCGA-AC-A2FF-01A	Breast	HR-WT	GRCh38	FALSE	FALSE	FALSE
TCGA-AC-A2FG-01A	Breast	HR-WT	GRCh38	FALSE	FALSE	FALSE
TCGA-AC-A2FK-01A	Breast	HR-WT	GRCh38	FALSE	FALSE	FALSE
TCGA-AC-A2FM-01A	Breast	HR-WT	GRCh38	FALSE	FALSE	FALSE
TCGA-AC-A2FO-01A	Breast	HR-WT	GRCh38	FALSE	FALSE	FALSE
TCGA-AC-A2QH-01A	Breast	HR-WT	GRCh38	FALSE	FALSE	FALSE
TCGA-AC-A2QI-01A	Breast	HR-WT	GRCh38	FALSE	FALSE	FALSE
TCGA-AC-A2QJ-01A	Breast	HR-WT	GRCh38	FALSE	FALSE	FALSE
TCGA-AC-A3EH-01A	Breast	HR-WT	GRCh38	FALSE	FALSE	FALSE
TCGA-AC-A3HN-01A	Breast	HR-WT	GRCh38	FALSE	FALSE	FALSE
TCGA-AC-A3OD-01B	Breast	HR-WT	GRCh38	FALSE	FALSE	FALSE
TCGA-AC-A3QP-01A	Breast	HR-WT	GRCh38	FALSE	FALSE	FALSE
TCGA-AC-A3TM-01A	Breast	HR-WT	GRCh38	FALSE	FALSE	FALSE
TCGA-AC-A3TN-01A	Breast	HR-WT	GRCh38	FALSE	FALSE	FALSE
TCGA-AC-A3W5-01A	Breast	HR-WT	GRCh38	FALSE	FALSE	FALSE
TCGA-AC-A3W7-01A	Breast	HR-WT	GRCh38	FALSE	FALSE	FALSE
TCGA-AC-A3YI-01A	Breast	HR-WT	GRCh38	FALSE	FALSE	FALSE
TCGA-AC-A3YJ-01A	Breast	HR-WT	GRCh38	FALSE	FALSE	FALSE
TCGA-AC-A5EH-01A	Breast	HR-WT	GRCh38	FALSE	FALSE	FALSE
TCGA-AC-A5XS-01A	Breast	HR-WT	GRCh38	FALSE	FALSE	FALSE
TCGA-AC-A5XU-01A	Breast	HR-WT	GRCh38	FALSE	FALSE	FALSE
TCGA-AC-A62X-01A	Breast	HR-WT	GRCh38	FALSE	FALSE	FALSE
TCGA-AC-A62Y-01A	Breast	HR-WT	GRCh38	FALSE	FALSE	FALSE
TCGA-AN-A03X-01A	Breast	HR-WT	GRCh38	FALSE	FALSE	FALSE
TCGA-AN-A03Y-01A	Breast	HR-WT	GRCh38	FALSE	FALSE	FALSE
TCGA-AN-A04A-01A	Breast	HR-WT	GRCh38	FALSE	FALSE	FALSE
TCGA-AN-A04C-01A	Breast	HR-WT	GRCh38	FALSE	FALSE	FALSE
TCGA-AN-A0AJ-01A	Breast	HR-WT	GRCh38	FALSE	FALSE	FALSE
TCGA-AN-A0AM-01A	Breast	HR-WT	GRCh38	FALSE	FALSE	FALSE
TCGA-AN-A0AR-01A	Breast	HR-WT	GRCh38	FALSE	FALSE	FALSE
TCGA-AN-A0AT-01A	Breast	HR-WT	GRCh38	FALSE	FALSE	FALSE
TCGA-AN-A0FF-01A	Breast	HR-WT	GRCh38	FALSE	FALSE	FALSE
TCGA-AN-A0FJ-01A	Breast	HR-WT	GRCh38	FALSE	FALSE	FALSE
TCGA-AN-A0FK-01A	Breast	HR-WT	GRCh38	FALSE	FALSE	FALSE
TCGA-AN-A0FS-01A	Breast	HR-WT	GRCh38	FALSE	FALSE	FALSE
TCGA-AN-A0FT-01A	Breast	HR-WT	GRCh38	FALSE	FALSE	FALSE
TCGA-AN-A0FV-01A	Breast	HR-WT	GRCh38	FALSE	FALSE	FALSE
TCGA-AN-A0FW-01A	Breast	HR-WT	GRCh38	FALSE	FALSE	FALSE
TCGA-AN-A0FY-01A	Breast	HR-WT	GRCh38	FALSE	FALSE	FALSE
TCGA-AN-A0FZ-01A	Breast	HR-WT	GRCh38	FALSE	FALSE	FALSE
TCGA-AN-A0XN-01A	Breast	HR-WT	GRCh38	FALSE	FALSE	FALSE
TCGA-AN-A0XO-01A	Breast	HR-WT	GRCh38	FALSE	FALSE	FALSE
TCGA-AN-A0XP-01A	Breast	HR-WT	GRCh38	FALSE	FALSE	FALSE
TCGA-AN-A0XR-01A	Breast	HR-WT	GRCh38	FALSE	FALSE	FALSE
TCGA-AN-A0XS-01A	Breast	HR-WT	GRCh38	FALSE	FALSE	FALSE
TCGA-AN-A0XT-01A	Breast	HR-WT	GRCh38	FALSE	FALSE	FALSE
TCGA-AN-A0XV-01A	Breast	HR-WT	GRCh38	FALSE	FALSE	FALSE
TCGA-AO-A03P-01A	Breast	HR-WT	GRCh38	FALSE	FALSE	FALSE
TCGA-AO-A03R-01A	Breast	HR-WT	GRCh38	FALSE	FALSE	FALSE
TCGA-AO-A03T-01A	Breast	HR-WT	GRCh38	FALSE	FALSE	FALSE
TCGA-AO-A0J3-01A	Breast	HR-WT	GRCh38	FALSE	FALSE	FALSE
TCGA-AO-A0J4-01A	Breast	HR-WT	GRCh38	FALSE	FALSE	FALSE
TCGA-AO-A0J5-01A	Breast	HR-WT	GRCh38	FALSE	FALSE	FALSE
TCGA-AO-A0J6-01A	Breast	HR-WT	GRCh38	FALSE	FALSE	FALSE
TCGA-AO-A0J7-01A	Breast	HR-WT	GRCh38	FALSE	FALSE	FALSE
TCGA-AO-A0J8-01A	Breast	HR-WT	GRCh38	FALSE	FALSE	FALSE
TCGA-AO-A0J9-01A	Breast	HR-WT	GRCh38	FALSE	FALSE	FALSE
TCGA-AO-A0JC-01A	Breast	HR-WT	GRCh38	FALSE	FALSE	FALSE
TCGA-AO-A0JD-01A	Breast	HR-WT	GRCh38	FALSE	FALSE	FALSE
TCGA-AO-A0JE-01A	Breast	HR-WT	GRCh38	FALSE	FALSE	FALSE
TCGA-AO-A0JF-01A	Breast	HR-WT	GRCh38	FALSE	FALSE	FALSE
TCGA-AO-A0JI-01A	Breast	HR-WT	GRCh38	FALSE	FALSE	FALSE
TCGA-AO-A0JJ-01A	Breast	HR-WT	GRCh38	FALSE	FALSE	FALSE
TCGA-AO-A12A-01A	Breast	HR-WT	GRCh38	FALSE	FALSE	FALSE
TCGA-AO-A12D-01A	Breast	HR-WT	GRCh38	FALSE	FALSE	FALSE
TCGA-AO-A12F-01A	Breast	HR-WT	GRCh38	FALSE	FALSE	FALSE
TCGA-AO-A12H-01A	Breast	HR-WT	GRCh38	FALSE	FALSE	FALSE
TCGA-AO-A1KP-01A	Breast	HR-WT	GRCh38	FALSE	FALSE	FALSE
TCGA-AO-A1KR-01A	Breast	HR-WT	GRCh38	FALSE	FALSE	FALSE
TCGA-AO-A1KS-01A	Breast	HR-WT	GRCh38	FALSE	FALSE	FALSE
TCGA-AO-A1KT-01A	Breast	HR-WT	GRCh38	FALSE	FALSE	FALSE
TCGA-AQ-A04H-01B	Breast	HR-WT	GRCh38	FALSE	FALSE	FALSE
TCGA-AQ-A04J-01A	Breast	HR-WT	GRCh38	FALSE	FALSE	FALSE
TCGA-AQ-A0Y5-01A	Breast	HR-WT	GRCh38	FALSE	FALSE	FALSE
TCGA-AQ-A1H2-01A	Breast	HR-WT	GRCh38	FALSE	FALSE	FALSE
TCGA-AQ-A1H3-01A	Breast	HR-WT	GRCh38	FALSE	FALSE	FALSE
TCGA-AQ-A54N-01A	Breast	HR-WT	GRCh38	FALSE	FALSE	FALSE
TCGA-AQ-A54O-01A	Breast	HR-WT	GRCh38	FALSE	FALSE	FALSE
TCGA-AR-A0TS-01A	Breast	HR-WT	GRCh38	FALSE	FALSE	FALSE
TCGA-AR-A0TX-01A	Breast	HR-WT	GRCh38	FALSE	FALSE	FALSE
TCGA-AR-A0TY-01A	Breast	HR-WT	GRCh38	FALSE	FALSE	FALSE
TCGA-AR-A0U0-01A	Breast	HR-WT	GRCh38	FALSE	FALSE	FALSE
TCGA-AR-A0U2-01A	Breast	HR-WT	GRCh38	FALSE	FALSE	FALSE
TCGA-AR-A0U3-01A	Breast	HR-WT	GRCh38	FALSE	FALSE	FALSE
TCGA-AR-A1AH-01A	Breast	HR-WT	GRCh38	FALSE	FALSE	FALSE
TCGA-AR-A1AI-01A	Breast	HR-WT	GRCh38	FALSE	FALSE	FALSE
TCGA-AR-A1AJ-01A	Breast	HR-WT	GRCh38	FALSE	FALSE	FALSE
TCGA-AR-A1AK-01A	Breast	HR-WT	GRCh38	FALSE	FALSE	FALSE
TCGA-AR-A1AL-01A	Breast	HR-WT	GRCh38	FALSE	FALSE	FALSE
TCGA-AR-A1AN-01A	Breast	HR-WT	GRCh38	FALSE	FALSE	FALSE
TCGA-AR-A1AP-01A	Breast	HR-WT	GRCh38	FALSE	FALSE	FALSE
TCGA-AR-A1AQ-01A	Breast	HR-WT	GRCh38	FALSE	FALSE	FALSE
TCGA-AR-A1AR-01A	Breast	HR-WT	GRCh38	FALSE	FALSE	FALSE
TCGA-AR-A1AS-01A	Breast	HR-WT	GRCh38	FALSE	FALSE	FALSE
TCGA-AR-A1AU-01A	Breast	HR-WT	GRCh38	FALSE	FALSE	FALSE
TCGA-AR-A1AV-01A	Breast	HR-WT	GRCh38	FALSE	FALSE	FALSE
TCGA-AR-A1AW-01A	Breast	HR-WT	GRCh38	FALSE	FALSE	FALSE
TCGA-AR-A24L-01A	Breast	HR-WT	GRCh38	FALSE	FALSE	FALSE
TCGA-AR-A24R-01A	Breast	HR-WT	GRCh38	FALSE	FALSE	FALSE
TCGA-AR-A24T-01A	Breast	HR-WT	GRCh38	FALSE	FALSE	FALSE
TCGA-AR-A24U-01A	Breast	HR-WT	GRCh38	FALSE	FALSE	FALSE
TCGA-AR-A24V-01A	Breast	HR-WT	GRCh38	FALSE	FALSE	FALSE
TCGA-AR-A24X-01A	Breast	HR-WT	GRCh38	FALSE	FALSE	FALSE
TCGA-AR-A24Z-01A	Breast	HR-WT	GRCh38	FALSE	FALSE	FALSE
TCGA-AR-A250-01A	Breast	HR-WT	GRCh38	FALSE	FALSE	FALSE
TCGA-AR-A252-01A	Breast	HR-WT	GRCh38	FALSE	FALSE	FALSE
TCGA-AR-A254-01A	Breast	HR-WT	GRCh38	FALSE	FALSE	FALSE
TCGA-AR-A256-01A	Breast	HR-WT	GRCh38	FALSE	FALSE	FALSE
TCGA-AR-A2LJ-01A	Breast	HR-WT	GRCh38	FALSE	FALSE	FALSE
TCGA-AR-A2LK-01A	Breast	HR-WT	GRCh38	FALSE	FALSE	FALSE
TCGA-AR-A2LL-01A	Breast	HR-WT	GRCh38	FALSE	FALSE	FALSE
TCGA-AR-A2LM-01A	Breast	HR-WT	GRCh38	FALSE	FALSE	FALSE
TCGA-AR-A2LO-01A	Breast	HR-WT	GRCh38	FALSE	FALSE	FALSE
TCGA-AR-A2LQ-01A	Breast	HR-WT	GRCh38	FALSE	FALSE	FALSE
TCGA-AR-A2LR-01A	Breast	HR-WT	GRCh38	FALSE	FALSE	FALSE
TCGA-AR-A5QM-01A	Breast	HR-WT	GRCh38	FALSE	FALSE	FALSE
TCGA-AR-A5QN-01A	Breast	HR-WT	GRCh38	FALSE	FALSE	FALSE
TCGA-AR-A5QP-01A	Breast	HR-WT	GRCh38	FALSE	FALSE	FALSE
TCGA-AR-A5QQ-01A	Breast	HR-WT	GRCh38	FALSE	FALSE	FALSE
TCGA-B6-A0I1-01A	Breast	HR-WT	GRCh38	FALSE	FALSE	FALSE
TCGA-B6-A0I2-01A	Breast	HR-WT	GRCh38	FALSE	FALSE	FALSE
TCGA-B6-A0I5-01A	Breast	HR-WT	GRCh38	FALSE	FALSE	FALSE
TCGA-B6-A0I9-01A	Breast	HR-WT	GRCh38	FALSE	FALSE	FALSE
TCGA-B6-A0IB-01A	Breast	HR-WT	GRCh38	FALSE	FALSE	FALSE
TCGA-B6-A0IC-01A	Breast	HR-WT	GRCh38	FALSE	FALSE	FALSE
TCGA-B6-A0IE-01A	Breast	HR-WT	GRCh38	FALSE	FALSE	FALSE
TCGA-B6-A0IH-01A	Breast	HR-WT	GRCh38	FALSE	FALSE	FALSE
TCGA-B6-A0IK-01A	Breast	HR-WT	GRCh38	FALSE	FALSE	FALSE
TCGA-B6-A0IM-01A	Breast	HR-WT	GRCh38	FALSE	FALSE	FALSE
TCGA-B6-A0IN-01A	Breast	HR-WT	GRCh38	FALSE	FALSE	FALSE
TCGA-B6-A0RE-01A	Breast	HR-WT	GRCh38	FALSE	FALSE	FALSE
TCGA-B6-A0RH-01A	Breast	HR-WT	GRCh38	FALSE	FALSE	FALSE
TCGA-B6-A0RI-01A	Breast	HR-WT	GRCh38	FALSE	FALSE	FALSE
TCGA-B6-A0RN-01A	Breast	HR-WT	GRCh38	FALSE	FALSE	FALSE
TCGA-B6-A0RO-01A	Breast	HR-WT	GRCh38	FALSE	FALSE	FALSE
TCGA-B6-A0RP-01A	Breast	HR-WT	GRCh38	FALSE	FALSE	FALSE
TCGA-B6-A0RQ-01A	Breast	HR-WT	GRCh38	FALSE	FALSE	FALSE
TCGA-B6-A0RT-01A	Breast	HR-WT	GRCh38	FALSE	FALSE	FALSE
TCGA-B6-A0RU-01A	Breast	HR-WT	GRCh38	FALSE	FALSE	FALSE
TCGA-B6-A0WT-01A	Breast	HR-WT	GRCh38	FALSE	FALSE	FALSE
TCGA-B6-A0WV-01A	Breast	HR-WT	GRCh38	FALSE	FALSE	FALSE
TCGA-B6-A0WX-01A	Breast	HR-WT	GRCh38	FALSE	FALSE	FALSE
TCGA-B6-A0WY-01A	Breast	HR-WT	GRCh38	FALSE	FALSE	FALSE
TCGA-B6-A0WZ-01A	Breast	HR-WT	GRCh38	FALSE	FALSE	FALSE
TCGA-B6-A0X0-01A	Breast	HR-WT	GRCh38	FALSE	FALSE	FALSE
TCGA-B6-A0X4-01A	Breast	HR-WT	GRCh38	FALSE	FALSE	FALSE
TCGA-B6-A0X5-01A	Breast	HR-WT	GRCh38	FALSE	FALSE	FALSE
TCGA-B6-A1KC-01B	Breast	HR-WT	GRCh38	FALSE	FALSE	FALSE
TCGA-B6-A1KF-01A	Breast	HR-WT	GRCh38	FALSE	FALSE	FALSE
TCGA-B6-A1KN-01A	Breast	HR-WT	GRCh38	FALSE	FALSE	FALSE
TCGA-B6-A2IU-01A	Breast	HR-WT	GRCh38	FALSE	FALSE	FALSE
TCGA-B6-A400-01A	Breast	HR-WT	GRCh38	FALSE	FALSE	FALSE
TCGA-B6-A401-01A	Breast	HR-WT	GRCh38	FALSE	FALSE	FALSE
TCGA-B6-A402-01A	Breast	HR-WT	GRCh38	FALSE	FALSE	FALSE
TCGA-B6-A408-01A	Breast	HR-WT	GRCh38	FALSE	FALSE	FALSE
TCGA-B6-A409-01A	Breast	HR-WT	GRCh38	FALSE	FALSE	FALSE
TCGA-B6-A40B-01A	Breast	HR-WT	GRCh38	FALSE	FALSE	FALSE
TCGA-B6-A40C-01A	Breast	HR-WT	GRCh38	FALSE	FALSE	FALSE
TCGA-BH-A0AU-01A	Breast	HR-WT	GRCh38	FALSE	FALSE	FALSE
TCGA-BH-A0AV-01A	Breast	HR-WT	GRCh38	FALSE	FALSE	FALSE
TCGA-BH-A0AW-01A	Breast	HR-WT	GRCh38	FALSE	FALSE	FALSE
TCGA-BH-A0AY-01A	Breast	HR-WT	GRCh38	FALSE	FALSE	FALSE
TCGA-BH-A0B0-01A	Breast	HR-WT	GRCh38	FALSE	FALSE	FALSE
TCGA-BH-A0B3-01A	Breast	HR-WT	GRCh38	FALSE	FALSE	FALSE
TCGA-BH-A0B5-01A	Breast	HR-WT	GRCh38	FALSE	FALSE	FALSE
TCGA-BH-A0B6-01A	Breast	HR-WT	GRCh38	FALSE	FALSE	FALSE
TCGA-BH-A0B7-01A	Breast	HR-WT	GRCh38	FALSE	FALSE	FALSE
TCGA-BH-A0BA-01A	Breast	HR-WT	GRCh38	FALSE	FALSE	FALSE
TCGA-BH-A0BC-01A	Breast	HR-WT	GRCh38	FALSE	FALSE	FALSE
TCGA-BH-A0BD-01A	Breast	HR-WT	GRCh38	FALSE	FALSE	FALSE
TCGA-BH-A0BF-01A	Breast	HR-WT	GRCh38	FALSE	FALSE	FALSE
TCGA-BH-A0BJ-01A	Breast	HR-WT	GRCh38	FALSE	FALSE	FALSE
TCGA-BH-A0BL-01A	Breast	HR-WT	GRCh38	FALSE	FALSE	FALSE
TCGA-BH-A0BO-01A	Breast	HR-WT	GRCh38	FALSE	FALSE	FALSE
TCGA-BH-A0BP-01A	Breast	HR-WT	GRCh38	FALSE	FALSE	FALSE
TCGA-BH-A0BS-01A	Breast	HR-WT	GRCh38	FALSE	FALSE	FALSE
TCGA-BH-A0BT-01A	Breast	HR-WT	GRCh38	FALSE	FALSE	FALSE
TCGA-BH-A0BV-01A	Breast	HR-WT	GRCh38	FALSE	FALSE	FALSE
TCGA-BH-A0BW-01A	Breast	HR-WT	GRCh38	FALSE	FALSE	FALSE
TCGA-BH-A0C0-01A	Breast	HR-WT	GRCh38	FALSE	FALSE	FALSE
TCGA-BH-A0C1-01B	Breast	HR-WT	GRCh38	FALSE	FALSE	FALSE
TCGA-BH-A0C3-01A	Breast	HR-WT	GRCh38	FALSE	FALSE	FALSE
TCGA-BH-A0C7-01B	Breast	HR-WT	GRCh38	FALSE	FALSE	FALSE
TCGA-BH-A0DD-01A	Breast	HR-WT	GRCh38	FALSE	FALSE	FALSE
TCGA-BH-A0DE-01A	Breast	HR-WT	GRCh38	FALSE	FALSE	FALSE
TCGA-BH-A0DG-01A	Breast	HR-WT	GRCh38	FALSE	FALSE	FALSE
TCGA-BH-A0DH-01A	Breast	HR-WT	GRCh38	FALSE	FALSE	FALSE
TCGA-BH-A0DI-01A	Breast	HR-WT	GRCh38	FALSE	FALSE	FALSE
TCGA-BH-A0DK-01A	Breast	HR-WT	GRCh38	FALSE	FALSE	FALSE
TCGA-BH-A0DL-01A	Breast	HR-WT	GRCh38	FALSE	FALSE	FALSE
TCGA-BH-A0DO-01B	Breast	HR-WT	GRCh38	FALSE	FALSE	FALSE
TCGA-BH-A0DP-01A	Breast	HR-WT	GRCh38	FALSE	FALSE	FALSE
TCGA-BH-A0DQ-01A	Breast	HR-WT	GRCh38	FALSE	FALSE	FALSE
TCGA-BH-A0DS-01A	Breast	HR-WT	GRCh38	FALSE	FALSE	FALSE
TCGA-BH-A0DT-01A	Breast	HR-WT	GRCh38	FALSE	FALSE	FALSE
TCGA-BH-A0DV-01A	Breast	HR-WT	GRCh38	FALSE	FALSE	FALSE
TCGA-BH-A0DX-01A	Breast	HR-WT	GRCh38	FALSE	FALSE	FALSE
TCGA-BH-A0DZ-01A	Breast	HR-WT	GRCh38	FALSE	FALSE	FALSE
TCGA-BH-A0E0-01A	Breast	HR-WT	GRCh38	FALSE	FALSE	FALSE
TCGA-BH-A0E1-01A	Breast	HR-WT	GRCh38	FALSE	FALSE	FALSE
TCGA-BH-A0E7-01A	Breast	HR-WT	GRCh38	FALSE	FALSE	FALSE
TCGA-BH-A0E9-01B	Breast	HR-WT	GRCh38	FALSE	FALSE	FALSE
TCGA-BH-A0EA-01A	Breast	HR-WT	GRCh38	FALSE	FALSE	FALSE
TCGA-BH-A0EE-01A	Breast	HR-WT	GRCh38	FALSE	FALSE	FALSE
TCGA-BH-A0EI-01A	Breast	HR-WT	GRCh38	FALSE	FALSE	FALSE
TCGA-BH-A0GY-01A	Breast	HR-WT	GRCh38	FALSE	FALSE	FALSE
TCGA-BH-A0GZ-01A	Breast	HR-WT	GRCh38	FALSE	FALSE	FALSE
TCGA-BH-A0H0-01A	Breast	HR-WT	GRCh38	FALSE	FALSE	FALSE
TCGA-BH-A0H3-01A	Breast	HR-WT	GRCh38	FALSE	FALSE	FALSE
TCGA-BH-A0H5-01A	Breast	HR-WT	GRCh38	FALSE	FALSE	FALSE
TCGA-BH-A0H6-01A	Breast	HR-WT	GRCh38	FALSE	FALSE	FALSE
TCGA-BH-A0H7-01A	Breast	HR-WT	GRCh38	FALSE	FALSE	FALSE
TCGA-BH-A0HI-01A	Breast	HR-WT	GRCh38	FALSE	FALSE	FALSE
TCGA-BH-A0HK-01A	Breast	HR-WT	GRCh38	FALSE	FALSE	FALSE
TCGA-BH-A0HO-01A	Breast	HR-WT	GRCh38	FALSE	FALSE	FALSE
TCGA-BH-A0HP-01A	Breast	HR-WT	GRCh38	FALSE	FALSE	FALSE
TCGA-BH-A0HQ-01A	Breast	HR-WT	GRCh38	FALSE	FALSE	FALSE
TCGA-BH-A0HU-01A	Breast	HR-WT	GRCh38	FALSE	FALSE	FALSE
TCGA-BH-A0HX-01A	Breast	HR-WT	GRCh38	FALSE	FALSE	FALSE
TCGA-BH-A0HY-01A	Breast	HR-WT	GRCh38	FALSE	FALSE	FALSE
TCGA-BH-A0RX-01A	Breast	HR-WT	GRCh38	FALSE	FALSE	FALSE
TCGA-BH-A0W3-01A	Breast	HR-WT	GRCh38	FALSE	FALSE	FALSE
TCGA-BH-A0W5-01A	Breast	HR-WT	GRCh38	FALSE	FALSE	FALSE
TCGA-BH-A0W7-01A	Breast	HR-WT	GRCh38	FALSE	FALSE	FALSE
TCGA-BH-A18F-01A	Breast	HR-WT	GRCh38	FALSE	FALSE	FALSE
TCGA-BH-A18H-01A	Breast	HR-WT	GRCh38	FALSE	FALSE	FALSE
TCGA-BH-A18I-01A	Breast	HR-WT	GRCh38	FALSE	FALSE	FALSE
TCGA-BH-A18J-01A	Breast	HR-WT	GRCh38	FALSE	FALSE	FALSE
TCGA-BH-A18K-01A	Breast	HR-WT	GRCh38	FALSE	FALSE	FALSE
TCGA-BH-A18L-01A	Breast	HR-WT	GRCh38	FALSE	FALSE	FALSE
TCGA-BH-A18N-01A	Breast	HR-WT	GRCh38	FALSE	FALSE	FALSE
TCGA-BH-A18P-01A	Breast	HR-WT	GRCh38	FALSE	FALSE	FALSE
TCGA-BH-A18Q-01A	Breast	HR-WT	GRCh38	FALSE	FALSE	FALSE
TCGA-BH-A18S-01A	Breast	HR-WT	GRCh38	FALSE	FALSE	FALSE
TCGA-BH-A18T-01A	Breast	HR-WT	GRCh38	FALSE	FALSE	FALSE
TCGA-BH-A18U-01A	Breast	HR-WT	GRCh38	FALSE	FALSE	FALSE
TCGA-BH-A18V-01A	Breast	HR-WT	GRCh38	FALSE	FALSE	FALSE
TCGA-BH-A1EN-01A	Breast	HR-WT	GRCh38	FALSE	FALSE	FALSE
TCGA-BH-A1EO-01A	Breast	HR-WT	GRCh38	FALSE	FALSE	FALSE
TCGA-BH-A1ES-01A	Breast	HR-WT	GRCh38	FALSE	FALSE	FALSE
TCGA-BH-A1EV-01A	Breast	HR-WT	GRCh38	FALSE	FALSE	FALSE
TCGA-BH-A1EW-01A	Breast	HR-WT	GRCh38	FALSE	FALSE	FALSE
TCGA-BH-A1EX-01A	Breast	HR-WT	GRCh38	FALSE	FALSE	FALSE
TCGA-BH-A1EY-01A	Breast	HR-WT	GRCh38	FALSE	FALSE	FALSE
TCGA-BH-A1F5-01A	Breast	HR-WT	GRCh38	FALSE	FALSE	FALSE
TCGA-BH-A1F6-01A	Breast	HR-WT	GRCh38	FALSE	FALSE	FALSE
TCGA-BH-A1F8-01A	Breast	HR-WT	GRCh38	FALSE	FALSE	FALSE
TCGA-BH-A1FC-01A	Breast	HR-WT	GRCh38	FALSE	FALSE	FALSE
TCGA-BH-A1FD-01A	Breast	HR-WT	GRCh38	FALSE	FALSE	FALSE
TCGA-BH-A1FE-01A	Breast	HR-WT	GRCh38	FALSE	FALSE	FALSE
TCGA-BH-A1FG-01A	Breast	HR-WT	GRCh38	FALSE	FALSE	FALSE
TCGA-BH-A1FJ-01A	Breast	HR-WT	GRCh38	FALSE	FALSE	FALSE
TCGA-BH-A1FL-01A	Breast	HR-WT	GRCh38	FALSE	FALSE	FALSE
TCGA-BH-A1FR-01A	Breast	HR-WT	GRCh38	FALSE	FALSE	FALSE
TCGA-BH-A201-01A	Breast	HR-WT	GRCh38	FALSE	FALSE	FALSE
TCGA-BH-A204-01A	Breast	HR-WT	GRCh38	FALSE	FALSE	FALSE
TCGA-BH-A208-01A	Breast	HR-WT	GRCh38	FALSE	FALSE	FALSE
TCGA-BH-A28Q-01A	Breast	HR-WT	GRCh38	FALSE	FALSE	FALSE
TCGA-BH-A42T-01A	Breast	HR-WT	GRCh38	FALSE	FALSE	FALSE
TCGA-BH-A42V-01A	Breast	HR-WT	GRCh38	FALSE	FALSE	FALSE
TCGA-BH-A5IZ-01A	Breast	HR-WT	GRCh38	FALSE	FALSE	FALSE
TCGA-BH-A5J0-01A	Breast	HR-WT	GRCh38	FALSE	FALSE	FALSE
TCGA-C8-A12L-01A	Breast	HR-WT	GRCh38	FALSE	FALSE	FALSE
TCGA-C8-A12M-01A	Breast	HR-WT	GRCh38	FALSE	FALSE	FALSE
TCGA-C8-A12N-01A	Breast	HR-WT	GRCh38	FALSE	FALSE	FALSE
TCGA-C8-A12O-01A	Breast	HR-WT	GRCh38	FALSE	FALSE	FALSE
TCGA-C8-A12P-01A	Breast	HR-WT	GRCh38	FALSE	FALSE	FALSE
TCGA-C8-A12Q-01A	Breast	HR-WT	GRCh38	FALSE	FALSE	FALSE
TCGA-C8-A12T-01A	Breast	HR-WT	GRCh38	FALSE	FALSE	FALSE
TCGA-C8-A12U-01A	Breast	HR-WT	GRCh38	FALSE	FALSE	FALSE
TCGA-C8-A12W-01A	Breast	HR-WT	GRCh38	FALSE	FALSE	FALSE
TCGA-C8-A12X-01A	Breast	HR-WT	GRCh38	FALSE	FALSE	FALSE
TCGA-C8-A12Y-01A	Breast	HR-WT	GRCh38	FALSE	FALSE	FALSE
TCGA-C8-A12Z-01A	Breast	HR-WT	GRCh38	FALSE	FALSE	FALSE
TCGA-C8-A130-01A	Breast	HR-WT	GRCh38	FALSE	FALSE	FALSE
TCGA-C8-A132-01A	Breast	HR-WT	GRCh38	FALSE	FALSE	FALSE
TCGA-C8-A134-01A	Breast	HR-WT	GRCh38	FALSE	FALSE	FALSE
TCGA-C8-A135-01A	Breast	HR-WT	GRCh38	FALSE	FALSE	FALSE
TCGA-C8-A137-01A	Breast	HR-WT	GRCh38	FALSE	FALSE	FALSE
TCGA-C8-A138-01A	Breast	HR-WT	GRCh38	FALSE	FALSE	FALSE
TCGA-C8-A1HE-01A	Breast	HR-WT	GRCh38	FALSE	FALSE	FALSE
TCGA-C8-A1HG-01A	Breast	HR-WT	GRCh38	FALSE	FALSE	FALSE
TCGA-C8-A1HI-01A	Breast	HR-WT	GRCh38	FALSE	FALSE	FALSE
TCGA-C8-A1HJ-01A	Breast	HR-WT	GRCh38	FALSE	FALSE	FALSE
TCGA-C8-A1HK-01A	Breast	HR-WT	GRCh38	FALSE	FALSE	FALSE
TCGA-C8-A1HL-01A	Breast	HR-WT	GRCh38	FALSE	FALSE	FALSE
TCGA-C8-A1HN-01A	Breast	HR-WT	GRCh38	FALSE	FALSE	FALSE
TCGA-C8-A26V-01A	Breast	HR-WT	GRCh38	FALSE	FALSE	FALSE
TCGA-C8-A26W-01A	Breast	HR-WT	GRCh38	FALSE	FALSE	FALSE
TCGA-C8-A26Z-01A	Breast	HR-WT	GRCh38	FALSE	FALSE	FALSE
TCGA-C8-A273-01A	Breast	HR-WT	GRCh38	FALSE	FALSE	FALSE
TCGA-C8-A275-01A	Breast	HR-WT	GRCh38	FALSE	FALSE	FALSE
TCGA-C8-A278-01A	Breast	HR-WT	GRCh38	FALSE	FALSE	FALSE
TCGA-C8-A27A-01A	Breast	HR-WT	GRCh38	FALSE	FALSE	FALSE
TCGA-C8-A27B-01A	Breast	HR-WT	GRCh38	FALSE	FALSE	FALSE
TCGA-C8-A3M7-01A	Breast	HR-WT	GRCh38	FALSE	FALSE	FALSE
TCGA-C8-A3M8-01A	Breast	HR-WT	GRCh38	FALSE	FALSE	FALSE
TCGA-D8-A13Z-01A	Breast	HR-WT	GRCh38	FALSE	FALSE	FALSE
TCGA-D8-A140-01A	Breast	HR-WT	GRCh38	FALSE	FALSE	FALSE
TCGA-D8-A142-01A	Breast	HR-WT	GRCh38	FALSE	FALSE	FALSE
TCGA-D8-A143-01A	Breast	HR-WT	GRCh38	FALSE	FALSE	FALSE
TCGA-D8-A145-01A	Breast	HR-WT	GRCh38	FALSE	FALSE	FALSE
TCGA-D8-A146-01A	Breast	HR-WT	GRCh38	FALSE	FALSE	FALSE
TCGA-D8-A1J9-01A	Breast	HR-WT	GRCh38	FALSE	FALSE	FALSE
TCGA-D8-A1JA-01A	Breast	HR-WT	GRCh38	FALSE	FALSE	FALSE
TCGA-D8-A1JE-01A	Breast	HR-WT	GRCh38	FALSE	FALSE	FALSE
TCGA-D8-A1JG-01B	Breast	HR-WT	GRCh38	FALSE	FALSE	FALSE
TCGA-D8-A1JH-01A	Breast	HR-WT	GRCh38	FALSE	FALSE	FALSE
TCGA-D8-A1JJ-01A	Breast	HR-WT	GRCh38	FALSE	FALSE	FALSE
TCGA-D8-A1JK-01A	Breast	HR-WT	GRCh38	FALSE	FALSE	FALSE
TCGA-D8-A1JL-01A	Breast	HR-WT	GRCh38	FALSE	FALSE	FALSE
TCGA-D8-A1JM-01A	Breast	HR-WT	GRCh38	FALSE	FALSE	FALSE
TCGA-D8-A1JN-01A	Breast	HR-WT	GRCh38	FALSE	FALSE	FALSE
TCGA-D8-A1JS-01A	Breast	HR-WT	GRCh38	FALSE	FALSE	FALSE
TCGA-D8-A1JT-01A	Breast	HR-WT	GRCh38	FALSE	FALSE	FALSE
TCGA-D8-A1X5-01A	Breast	HR-WT	GRCh38	FALSE	FALSE	FALSE
TCGA-D8-A1X7-01A	Breast	HR-WT	GRCh38	FALSE	FALSE	FALSE
TCGA-D8-A1XA-01A	Breast	HR-WT	GRCh38	FALSE	FALSE	FALSE
TCGA-D8-A1XF-01A	Breast	HR-WT	GRCh38	FALSE	FALSE	FALSE
TCGA-D8-A1XG-01A	Breast	HR-WT	GRCh38	FALSE	FALSE	FALSE
TCGA-D8-A27P-01A	Breast	HR-WT	GRCh38	FALSE	FALSE	FALSE
TCGA-D8-A27T-01A	Breast	HR-WT	GRCh38	FALSE	FALSE	FALSE
TCGA-D8-A3Z5-01A	Breast	HR-WT	GRCh38	FALSE	FALSE	FALSE
TCGA-D8-A3Z6-01A	Breast	HR-WT	GRCh38	FALSE	FALSE	FALSE
TCGA-D8-A4Z1-01A	Breast	HR-WT	GRCh38	FALSE	FALSE	FALSE
TCGA-E2-A10A-01A	Breast	HR-WT	GRCh38	FALSE	FALSE	FALSE
TCGA-E2-A14O-01A	Breast	HR-WT	GRCh38	FALSE	FALSE	FALSE
TCGA-E2-A14P-01A	Breast	HR-WT	GRCh38	FALSE	FALSE	FALSE
TCGA-E2-A14Q-01A	Breast	HR-WT	GRCh38	FALSE	FALSE	FALSE
TCGA-E2-A14S-01A	Breast	HR-WT	GRCh38	FALSE	FALSE	FALSE
TCGA-E2-A14T-01A	Breast	HR-WT	GRCh38	FALSE	FALSE	FALSE
TCGA-E2-A14V-01A	Breast	HR-WT	GRCh38	FALSE	FALSE	FALSE
TCGA-E2-A14X-01A	Breast	HR-WT	GRCh38	FALSE	FALSE	FALSE
TCGA-E2-A14Y-01A	Breast	HR-WT	GRCh38	FALSE	FALSE	FALSE
TCGA-E2-A150-01A	Breast	HR-WT	GRCh38	FALSE	FALSE	FALSE
TCGA-E2-A152-01A	Breast	HR-WT	GRCh38	FALSE	FALSE	FALSE
TCGA-E2-A153-01A	Breast	HR-WT	GRCh38	FALSE	FALSE	FALSE
TCGA-E2-A154-01A	Breast	HR-WT	GRCh38	FALSE	FALSE	FALSE
TCGA-E2-A155-01A	Breast	HR-WT	GRCh38	FALSE	FALSE	FALSE
TCGA-E2-A156-01A	Breast	HR-WT	GRCh38	FALSE	FALSE	FALSE
TCGA-E2-A158-01A	Breast	HR-WT	GRCh38	FALSE	FALSE	FALSE
TCGA-E2-A159-01A	Breast	HR-WT	GRCh38	FALSE	FALSE	FALSE
TCGA-E2-A15A-01A	Breast	HR-WT	GRCh38	FALSE	FALSE	FALSE
TCGA-E2-A15C-01A	Breast	HR-WT	GRCh38	FALSE	FALSE	FALSE
TCGA-E2-A15D-01A	Breast	HR-WT	GRCh38	FALSE	FALSE	FALSE
TCGA-E2-A15G-01A	Breast	HR-WT	GRCh38	FALSE	FALSE	FALSE
TCGA-E2-A15H-01A	Breast	HR-WT	GRCh38	FALSE	FALSE	FALSE
TCGA-E2-A15J-01A	Breast	HR-WT	GRCh38	FALSE	FALSE	FALSE
TCGA-E2-A15K-01A	Breast	HR-WT	GRCh38	FALSE	FALSE	FALSE
TCGA-E2-A15L-01A	Breast	HR-WT	GRCh38	FALSE	FALSE	FALSE
TCGA-E2-A15M-01A	Breast	HR-WT	GRCh38	FALSE	FALSE	FALSE
TCGA-E2-A15O-01A	Breast	HR-WT	GRCh38	FALSE	FALSE	FALSE
TCGA-E2-A15P-01A	Breast	HR-WT	GRCh38	FALSE	FALSE	FALSE
TCGA-E2-A15R-01A	Breast	HR-WT	GRCh38	FALSE	FALSE	FALSE
TCGA-E2-A15T-01A	Breast	HR-WT	GRCh38	FALSE	FALSE	FALSE
TCGA-E2-A1AZ-01A	Breast	HR-WT	GRCh38	FALSE	FALSE	FALSE
TCGA-E2-A1B0-01A	Breast	HR-WT	GRCh38	FALSE	FALSE	FALSE
TCGA-E2-A1B1-01A	Breast	HR-WT	GRCh38	FALSE	FALSE	FALSE
TCGA-E2-A1B4-01A	Breast	HR-WT	GRCh38	FALSE	FALSE	FALSE
TCGA-E2-A1B5-01A	Breast	HR-WT	GRCh38	FALSE	FALSE	FALSE
TCGA-E2-A1B6-01A	Breast	HR-WT	GRCh38	FALSE	FALSE	FALSE
TCGA-E2-A1BC-01A	Breast	HR-WT	GRCh38	FALSE	FALSE	FALSE
TCGA-E2-A1BD-01A	Breast	HR-WT	GRCh38	FALSE	FALSE	FALSE
TCGA-E2-A1IF-01A	Breast	HR-WT	GRCh38	FALSE	FALSE	FALSE
TCGA-E2-A1IG-01A	Breast	HR-WT	GRCh38	FALSE	FALSE	FALSE
TCGA-E2-A1II-01A	Breast	HR-WT	GRCh38	FALSE	FALSE	FALSE
TCGA-E2-A1IJ-01A	Breast	HR-WT	GRCh38	FALSE	FALSE	FALSE
TCGA-E2-A1IK-01A	Breast	HR-WT	GRCh38	FALSE	FALSE	FALSE
TCGA-E2-A1IL-01A	Breast	HR-WT	GRCh38	FALSE	FALSE	FALSE
TCGA-E2-A1IN-01A	Breast	HR-WT	GRCh38	FALSE	FALSE	FALSE
TCGA-E2-A1IO-01A	Breast	HR-WT	GRCh38	FALSE	FALSE	FALSE
TCGA-E2-A1IU-01A	Breast	HR-WT	GRCh38	FALSE	FALSE	FALSE
TCGA-E2-A1L6-01A	Breast	HR-WT	GRCh38	FALSE	FALSE	FALSE
TCGA-E2-A1L7-01A	Breast	HR-WT	GRCh38	FALSE	FALSE	FALSE
TCGA-E2-A1L8-01A	Breast	HR-WT	GRCh38	FALSE	FALSE	FALSE
TCGA-E2-A1L9-01A	Breast	HR-WT	GRCh38	FALSE	FALSE	FALSE
TCGA-E2-A1LA-01A	Breast	HR-WT	GRCh38	FALSE	FALSE	FALSE
TCGA-E2-A1LB-01A	Breast	HR-WT	GRCh38	FALSE	FALSE	FALSE
TCGA-E2-A1LE-01A	Breast	HR-WT	GRCh38	FALSE	FALSE	FALSE
TCGA-E2-A1LG-01A	Breast	HR-WT	GRCh38	FALSE	FALSE	FALSE
TCGA-E2-A1LH-01A	Breast	HR-WT	GRCh38	FALSE	FALSE	FALSE
TCGA-E2-A1LI-01A	Breast	HR-WT	GRCh38	FALSE	FALSE	FALSE
TCGA-E2-A1LK-01A	Breast	HR-WT	GRCh38	FALSE	FALSE	FALSE
TCGA-E2-A2P5-01A	Breast	HR-WT	GRCh38	FALSE	FALSE	FALSE
TCGA-E2-A2P6-01A	Breast	HR-WT	GRCh38	FALSE	FALSE	FALSE
TCGA-E2-A56Z-01A	Breast	HR-WT	GRCh38	FALSE	FALSE	FALSE
TCGA-E2-A570-01A	Breast	HR-WT	GRCh38	FALSE	FALSE	FALSE
TCGA-E2-A574-01A	Breast	HR-WT	GRCh38	FALSE	FALSE	FALSE
TCGA-E9-A1N4-01A	Breast	HR-WT	GRCh38	FALSE	FALSE	FALSE
TCGA-E9-A1N5-01A	Breast	HR-WT	GRCh38	FALSE	FALSE	FALSE
TCGA-E9-A1N8-01A	Breast	HR-WT	GRCh38	FALSE	FALSE	FALSE
TCGA-E9-A1N9-01A	Breast	HR-WT	GRCh38	FALSE	FALSE	FALSE
TCGA-E9-A1NA-01A	Breast	HR-WT	GRCh38	FALSE	FALSE	FALSE
TCGA-E9-A1NF-01A	Breast	HR-WT	GRCh38	FALSE	FALSE	FALSE
TCGA-E9-A1NG-01A	Breast	HR-WT	GRCh38	FALSE	FALSE	FALSE
TCGA-E9-A1NI-01A	Breast	HR-WT	GRCh38	FALSE	FALSE	FALSE
TCGA-E9-A1R0-01A	Breast	HR-WT	GRCh38	FALSE	FALSE	FALSE
TCGA-E9-A1R3-01A	Breast	HR-WT	GRCh38	FALSE	FALSE	FALSE
TCGA-E9-A1R4-01A	Breast	HR-WT	GRCh38	FALSE	FALSE	FALSE
TCGA-E9-A1R5-01A	Breast	HR-WT	GRCh38	FALSE	FALSE	FALSE
TCGA-E9-A1R6-01A	Breast	HR-WT	GRCh38	FALSE	FALSE	FALSE
TCGA-E9-A1R7-01A	Breast	HR-WT	GRCh38	FALSE	FALSE	FALSE
TCGA-E9-A1RA-01A	Breast	HR-WT	GRCh38	FALSE	FALSE	FALSE
TCGA-E9-A1RB-01A	Breast	HR-WT	GRCh38	FALSE	FALSE	FALSE
TCGA-E9-A1RC-01A	Breast	HR-WT	GRCh38	FALSE	FALSE	FALSE
TCGA-E9-A1RF-01A	Breast	HR-WT	GRCh38	FALSE	FALSE	FALSE
TCGA-E9-A1RG-01A	Breast	HR-WT	GRCh38	FALSE	FALSE	FALSE
TCGA-E9-A1RH-01A	Breast	HR-WT	GRCh38	FALSE	FALSE	FALSE
TCGA-E9-A226-01A	Breast	HR-WT	GRCh38	FALSE	FALSE	FALSE
TCGA-E9-A227-01A	Breast	HR-WT	GRCh38	FALSE	FALSE	FALSE
TCGA-E9-A228-01A	Breast	HR-WT	GRCh38	FALSE	FALSE	FALSE
TCGA-E9-A229-01A	Breast	HR-WT	GRCh38	FALSE	FALSE	FALSE
TCGA-E9-A22A-01A	Breast	HR-WT	GRCh38	FALSE	FALSE	FALSE
TCGA-E9-A22B-01A	Breast	HR-WT	GRCh38	FALSE	FALSE	FALSE
TCGA-E9-A22H-01A	Breast	HR-WT	GRCh38	FALSE	FALSE	FALSE
TCGA-E9-A243-01A	Breast	HR-WT	GRCh38	FALSE	FALSE	FALSE
TCGA-E9-A245-01A	Breast	HR-WT	GRCh38	FALSE	FALSE	FALSE
TCGA-E9-A247-01A	Breast	HR-WT	GRCh38	FALSE	FALSE	FALSE
TCGA-E9-A249-01A	Breast	HR-WT	GRCh38	FALSE	FALSE	FALSE
TCGA-E9-A24A-01A	Breast	HR-WT	GRCh38	FALSE	FALSE	FALSE
TCGA-E9-A2JT-01A	Breast	HR-WT	GRCh38	FALSE	FALSE	FALSE
TCGA-E9-A3X8-01A	Breast	HR-WT	GRCh38	FALSE	FALSE	FALSE
TCGA-E9-A54X-01A	Breast	HR-WT	GRCh38	FALSE	FALSE	FALSE
TCGA-E9-A54Y-01A	Breast	HR-WT	GRCh38	FALSE	FALSE	FALSE
TCGA-E9-A5FL-01A	Breast	HR-WT	GRCh38	FALSE	FALSE	FALSE
TCGA-E9-A5UO-01A	Breast	HR-WT	GRCh38	FALSE	FALSE	FALSE
TCGA-E9-A5UP-01A	Breast	HR-WT	GRCh38	FALSE	FALSE	FALSE
TCGA-EW-A1IW-01A	Breast	HR-WT	GRCh38	FALSE	FALSE	FALSE
TCGA-EW-A1IX-01A	Breast	HR-WT	GRCh38	FALSE	FALSE	FALSE
TCGA-EW-A1J1-01A	Breast	HR-WT	GRCh38	FALSE	FALSE	FALSE
TCGA-EW-A1J2-01A	Breast	HR-WT	GRCh38	FALSE	FALSE	FALSE
TCGA-EW-A1J3-01A	Breast	HR-WT	GRCh38	FALSE	FALSE	FALSE
TCGA-EW-A1J5-01A	Breast	HR-WT	GRCh38	FALSE	FALSE	FALSE
TCGA-EW-A1J6-01A	Breast	HR-WT	GRCh38	FALSE	FALSE	FALSE
TCGA-EW-A1OY-01A	Breast	HR-WT	GRCh38	FALSE	FALSE	FALSE
TCGA-EW-A1OZ-01A	Breast	HR-WT	GRCh38	FALSE	FALSE	FALSE
TCGA-EW-A1P0-01A	Breast	HR-WT	GRCh38	FALSE	FALSE	FALSE
TCGA-EW-A1P3-01A	Breast	HR-WT	GRCh38	FALSE	FALSE	FALSE
TCGA-EW-A1P5-01A	Breast	HR-WT	GRCh38	FALSE	FALSE	FALSE
TCGA-EW-A1P6-01A	Breast	HR-WT	GRCh38	FALSE	FALSE	FALSE
TCGA-EW-A1P8-01A	Breast	HR-WT	GRCh38	FALSE	FALSE	FALSE
TCGA-EW-A1PA-01A	Breast	HR-WT	GRCh38	FALSE	FALSE	FALSE
TCGA-EW-A1PB-01A	Breast	HR-WT	GRCh38	FALSE	FALSE	FALSE
TCGA-EW-A1PC-01B	Breast	HR-WT	GRCh38	FALSE	FALSE	FALSE
TCGA-EW-A1PH-01A	Breast	HR-WT	GRCh38	FALSE	FALSE	FALSE
TCGA-EW-A2FR-01A	Breast	HR-WT	GRCh38	FALSE	FALSE	FALSE
TCGA-EW-A2FS-01A	Breast	HR-WT	GRCh38	FALSE	FALSE	FALSE
TCGA-EW-A2FW-01A	Breast	HR-WT	GRCh38	FALSE	FALSE	FALSE
TCGA-EW-A3E8-01B	Breast	HR-WT	GRCh38	FALSE	FALSE	FALSE
TCGA-EW-A3U0-01A	Breast	HR-WT	GRCh38	FALSE	FALSE	FALSE
TCGA-GI-A2C8-01A	Breast	HR-WT	GRCh38	FALSE	FALSE	FALSE
TCGA-GM-A2D9-01A	Breast	HR-WT	GRCh38	FALSE	FALSE	FALSE
TCGA-GM-A2DA-01A	Breast	HR-WT	GRCh38	FALSE	FALSE	FALSE
TCGA-GM-A2DC-01A	Breast	HR-WT	GRCh38	FALSE	FALSE	FALSE
TCGA-GM-A2DF-01A	Breast	HR-WT	GRCh38	FALSE	FALSE	FALSE
TCGA-GM-A2DI-01A	Breast	HR-WT	GRCh38	FALSE	FALSE	FALSE
TCGA-GM-A2DK-01A	Breast	HR-WT	GRCh38	FALSE	FALSE	FALSE
TCGA-GM-A2DN-01A	Breast	HR-WT	GRCh38	FALSE	FALSE	FALSE
TCGA-GM-A3NW-01A	Breast	HR-WT	GRCh38	FALSE	FALSE	FALSE
TCGA-GM-A3NY-01A	Breast	HR-WT	GRCh38	FALSE	FALSE	FALSE
TCGA-GM-A3XG-01A	Breast	HR-WT	GRCh38	FALSE	FALSE	FALSE
TCGA-GM-A3XN-01A	Breast	HR-WT	GRCh38	FALSE	FALSE	FALSE
TCGA-GM-A4E0-01A	Breast	HR-WT	GRCh38	FALSE	FALSE	FALSE
TCGA-GM-A5PV-01A	Breast	HR-WT	GRCh38	FALSE	FALSE	FALSE
TCGA-GM-A5PX-01A	Breast	HR-WT	GRCh38	FALSE	FALSE	FALSE
TCGA-HN-A2OB-01A	Breast	HR-WT	GRCh38	FALSE	FALSE	FALSE
TCGA-JL-A3YW-01A	Breast	HR-WT	GRCh38	FALSE	FALSE	FALSE
TCGA-JL-A3YX-01A	Breast	HR-WT	GRCh38	FALSE	FALSE	FALSE
TCGA-LL-A440-01A	Breast	HR-WT	GRCh38	FALSE	FALSE	FALSE
TCGA-LL-A50Y-01A	Breast	HR-WT	GRCh38	FALSE	FALSE	FALSE
TCGA-LL-A5YL-01A	Breast	HR-WT	GRCh38	FALSE	FALSE	FALSE
TCGA-LL-A5YM-01A	Breast	HR-WT	GRCh38	FALSE	FALSE	FALSE
TCGA-LL-A5YO-01A	Breast	HR-WT	GRCh38	FALSE	FALSE	FALSE
TCGA-LL-A5YP-01A	Breast	HR-WT	GRCh38	FALSE	FALSE	FALSE
TCGA-LQ-A4E4-01A	Breast	HR-WT	GRCh38	FALSE	FALSE	FALSE
TCGA-MS-A51U-01A	Breast	HR-WT	GRCh38	FALSE	FALSE	FALSE
TCGA-OK-A5Q2-01A	Breast	HR-WT	GRCh38	FALSE	FALSE	FALSE
TCGA-OL-A5D6-01A	Breast	HR-WT	GRCh38	FALSE	FALSE	FALSE
TCGA-OL-A5D7-01A	Breast	HR-WT	GRCh38	FALSE	FALSE	FALSE
TCGA-OL-A5D8-01A	Breast	HR-WT	GRCh38	FALSE	FALSE	FALSE
TCGA-OL-A5DA-01A	Breast	HR-WT	GRCh38	FALSE	FALSE	FALSE
TCGA-OL-A5RV-01A	Breast	HR-WT	GRCh38	FALSE	FALSE	FALSE
TCGA-OL-A5RZ-01A	Breast	HR-WT	GRCh38	FALSE	FALSE	FALSE
TCGA-OL-A5S0-01A	Breast	HR-WT	GRCh38	FALSE	FALSE	FALSE
TCGA-OL-A66H-01A	Breast	HR-WT	GRCh38	FALSE	FALSE	FALSE
TCGA-OL-A66I-01A	Breast	HR-WT	GRCh38	FALSE	FALSE	FALSE
TCGA-OL-A66J-01A	Breast	HR-WT	GRCh38	FALSE	FALSE	FALSE
TCGA-OL-A66K-01A	Breast	HR-WT	GRCh38	FALSE	FALSE	FALSE
TCGA-PE-A5DE-01A	Breast	HR-WT	GRCh38	FALSE	FALSE	FALSE
TCGA-S3-AA10-01A	Breast	HR-WT	GRCh38	FALSE	FALSE	FALSE
TCGA-WT-AB44-01A	Breast	HR-WT	GRCh38	FALSE	FALSE	FALSE

## Sheet: TCGAOvarian_gBRCA
TCGA Tumor	Tumor Type	Tumor Group	Build of tumor + germline bam	Germline mutation gene	Germline mutation
TCGA-04-1336-01A	Ovarian	gBRCA1/2	GRCh38	BRCA2	p.T1738fs
TCGA-04-1367-01A	Ovarian	gBRCA1/2	GRCh38	BRCA2	c.G880T:p.E294X
TCGA-09-2045-01A	Ovarian	gBRCA1/2	GRCh38	BRCA1	c.5335delC:p.Q1779fs
TCGA-09-2051-01A	Ovarian	gBRCA1/2	GRCh38	BRCA1	c.5265dupC:p.Q1756fs
TCGA-10-0931-01A	Ovarian	gBRCA1/2	GRCh38	BRCA1	c.68_69del:p.E23fs
TCGA-13-0726-01A	Ovarian	gBRCA1/2	GRCh38	BRCA2	c.A7180T:p.R2394X
TCGA-13-0887-01A	Ovarian	gBRCA1/2	GRCh38	BRCA1	c.68_69del:p.E23fs
TCGA-13-0893-01B	Ovarian	gBRCA1/2	GRCh38	BRCA1	c.1507_1508insATAAATTAAA:p.K503fs
TCGA-13-0894-01B	Ovarian	gBRCA1/2	GRCh38	BRCA1	c.C3403T:p.Q1135X
TCGA-13-0903-01A	Ovarian	gBRCA1/2	GRCh38	BRCA1	c.1510delC:p.R504fs
TCGA-13-0913-01A	Ovarian	gBRCA1/2	GRCh38	BRCA2	c.5569_5573del:p.E1857fs
TCGA-13-1404-01A	Ovarian	gBRCA1/2	GRCh38	BRCA1	c.G1115A:p.W372X
TCGA-13-1488-01A	Ovarian	gBRCA1/2	GRCh38	BRCA1	c.C2138G:p.S713X
TCGA-13-1498-01A	Ovarian	gBRCA1/2	GRCh38	BRCA2	c.5946delT:p.S1982fs
TCGA-13-1499-01A	Ovarian	gBRCA1/2	GRCh38	BRCA2	c.5946delT:p.S1982fs
TCGA-13-1512-01A	Ovarian	gBRCA1/2	GRCh38	BRCA1	c.2475delC:p.D825fs
TCGA-20-1685-01A	Ovarian	gBRCA1/2	GRCh38	BRCA2	c.5946delT:p.S1982fs
TCGA-20-1687-01A	Ovarian	gBRCA1/2	GRCh38	BRCA1	c.3756delAGAC:p.S1253fs
TCGA-23-1021-01B	Ovarian	gBRCA1/2	GRCh38	BRCA2	c.A6037T:p.K2013X
TCGA-23-1027-01A	Ovarian	gBRCA1/2	GRCh38	BRCA1	c.68_69del:p.E23fs
TCGA-23-1029-01B	Ovarian	gBRCA1/2	GRCh38	BRCA2	c.5946delT:p.S1982fs
TCGA-23-1114-01B	Ovarian	gBRCA1/2	GRCh38	BRCA2	c.5946delT:p.S1982fs
TCGA-23-1118-01A	Ovarian	gBRCA1/2	GRCh38	BRCA1	c.68_69del:p.E23fs
TCGA-23-1122-01A	Ovarian	gBRCA1/2	GRCh38	BRCA1	c.5265dupC:p.Q1756fs
TCGA-23-2077-01A	Ovarian	gBRCA1/2	GRCh38	BRCA1	c.5265dupC:p.Q1756fs
TCGA-23-2078-01A	Ovarian	gBRCA1/2	GRCh38	BRCA1	c.68_69del:p.E23fs
TCGA-23-2079-01A	Ovarian	gBRCA1/2	GRCh38	BRCA1	c.68_69del:p.E23fs
TCGA-23-2081-01A	Ovarian	gBRCA1/2	GRCh38	BRCA1	c.5265dupC:p.Q1756fs
TCGA-23-2084-01A	Ovarian	gBRCA1/2	GRCh38	BRCA2	c.5946delT:p.S1982fs
TCGA-24-0975-01B	Ovarian	gBRCA1/2	GRCh38	BRCA2	c.631+2T>G
TCGA-24-1103-01A	Ovarian	gBRCA1/2	GRCh38	BRCA1	c.T190G:p.C64G
TCGA-24-1417-01A	Ovarian	gBRCA1/2	GRCh38	BRCA2	c.5112_5115del:p.R1704fs
TCGA-24-1463-01A	Ovarian	gBRCA1/2	GRCh38	BRCA2	c.1806dupA:p.G602fs
TCGA-24-1470-01A	Ovarian	gBRCA1/2	GRCh38	BRCA1	c.5030_5033del:p.T1677fs
TCGA-24-1849-01A	Ovarian	gBRCA1/2	GRCh38	BRCA2	c.C4889G:p.S1630X
TCGA-24-2024-01A	Ovarian	gBRCA1/2	GRCh38	BRCA2	c.5128_5131del:p.Y1710fs
TCGA-24-2267-01A	Ovarian	gBRCA1/2	GRCh38	BRCA1	c.C5095T:p.R1699W
TCGA-24-2280-01A	Ovarian	gBRCA1/2	GRCh38	BRCA2	c.5946delT:p.S1982fs
TCGA-24-2288-01A	Ovarian	gBRCA1/2	GRCh38	BRCA2	c.657_658del:p.T219fs
TCGA-24-2293-01A	Ovarian	gBRCA1/2	GRCh38	BRCA2	c.C7558T:p.R2520X
TCGA-24-2298-01A	Ovarian	gBRCA1/2	GRCh38	BRCA1	c.4182_4183insTC:p.Q1395fs
TCGA-25-1314-01A	Ovarian	gBRCA1/2	GRCh38	BRCA2	c.5211_5214del:p.D1737fs
TCGA-25-2392-01A	Ovarian	gBRCA1/2	GRCh38	BRCA1	c.4035delA:p.E1345fs
TCGA-25-2401-01A	Ovarian	gBRCA1/2	GRCh38	BRCA1	c.5265dupC:p.Q1756fs
TCGA-25-2404-01A	Ovarian	gBRCA1/2	GRCh38	BRCA2	c.1025delA:p.E342fs
TCGA-29-1688-01A	Ovarian	gBRCA1/2	GRCh38	BRCA1	c.3756delAGAC:p.S1253fs
TCGA-29-1691-01A	Ovarian	gBRCA1/2	GRCh38	BRCA1	c.G5363T:p.G1788V
TCGA-29-1696-01A	Ovarian	gBRCA1/2	GRCh38	BRCA1	c.514delC:p.Q172fs
TCGA-29-1764-01A	Ovarian	gBRCA1/2	GRCh38	BRCA2	c.3846_3847del:p.T1282fs
TCGA-29-1770-01A	Ovarian	gBRCA1/2	GRCh38	BRCA1	c.2457delC:p.S819fs
TCGA-29-1775-01A	Ovarian	gBRCA1/2	GRCh38	BRCA1	c.68_69del:p.E23fs
TCGA-29-1781-01A	Ovarian	gBRCA1/2	GRCh38	BRCA1	c.2475delC:p.D825fs
TCGA-29-1784-01A	Ovarian	gBRCA1/2	GRCh38	BRCA2	c.6402_6406del:p.N2134fs
TCGA-42-2582-01A	Ovarian	gBRCA1/2	GRCh38	BRCA1	c.1213delA:p.S405fs
TCGA-42-2589-01A	Ovarian	gBRCA1/2	GRCh38	BRCA1	c.4065_4068del:p.N1355fs
TCGA-57-1993-01A	Ovarian	gBRCA1/2	GRCh38	BRCA1	c.G2389T:p.E797X
TCGA-59-2348-01A	Ovarian	gBRCA1/2	GRCh38	BRCA1	c.G2389T:p.E797X
TCGA-59-2350-01A	Ovarian	gBRCA1/2	GRCh38	BRCA2	c.5946delT:p.S1982fs
TCGA-59-2351-01A	Ovarian	gBRCA1/2	GRCh38	BRCA2	c.5946delT:p.S1982fs
TCGA-59-A5PD-01A	Ovarian	gBRCA1/2	GRCh38	BRCA2	c.3604delA:p.K1202fs
TCGA-61-2003-01A	Ovarian	gBRCA1/2	GRCh38	BRCA1	c.G5445A:p.W1815X
TCGA-61-2008-01A	Ovarian	gBRCA1/2	GRCh38	BRCA1	c.G5445A:p.W1815X
TCGA-61-2104-01A	Ovarian	gBRCA1/2	GRCh38	BRCA1	c.1961delA:p.K654fs
TCGA-61-2109-01A	Ovarian	gBRCA1/2	GRCh38	BRCA1	c.1961delA:p.K654fs
TCGA-61-2610-02A	Ovarian	gBRCA1/2	GRCh38	BRCA1	c.2214_2215insCT:p.K739fs
TCGA-04-1356-01A	Ovarian	gBRCA1/2	GRCh37	BRCA1	p.N723fs
TCGA-13-0793-01A	Ovarian	gBRCA1/2	GRCh37	BRCA2	p.G3086fs
TCGA-13-0883-01A	Ovarian	gBRCA1/2	GRCh37	BRCA1	c.5265dupC:p.Q1756fs
TCGA-13-0886-01A	Ovarian	gBRCA1/2	GRCh37	BRCA2	p.S1982fs

## Sheet: TCGAOvarian_HR-WT
TCGA Tumor	Tumor Type	Tumor Group	Build of tumor + germline bam	gBRCA1/2 mutation	Somatic BRCA1/2 loss	Germline or somatic mutation in HR gene
TCGA-04-1342-01A	Ovarian	HR-WT	GRCh38	FALSE	FALSE	FALSE
TCGA-04-1343-01A	Ovarian	HR-WT	GRCh38	FALSE	FALSE	FALSE
TCGA-04-1346-01A	Ovarian	HR-WT	GRCh38	FALSE	FALSE	FALSE
TCGA-04-1347-01A	Ovarian	HR-WT	GRCh38	FALSE	FALSE	FALSE
TCGA-04-1348-01A	Ovarian	HR-WT	GRCh38	FALSE	FALSE	FALSE
TCGA-04-1349-01A	Ovarian	HR-WT	GRCh38	FALSE	FALSE	FALSE
TCGA-04-1361-01A	Ovarian	HR-WT	GRCh38	FALSE	FALSE	FALSE
TCGA-04-1542-01A	Ovarian	HR-WT	GRCh38	FALSE	FALSE	FALSE
TCGA-09-0364-01A	Ovarian	HR-WT	GRCh38	FALSE	FALSE	FALSE
TCGA-09-0366-01A	Ovarian	HR-WT	GRCh38	FALSE	FALSE	FALSE
TCGA-09-0369-01A	Ovarian	HR-WT	GRCh38	FALSE	FALSE	FALSE
TCGA-09-1670-01A	Ovarian	HR-WT	GRCh38	FALSE	FALSE	FALSE
TCGA-09-1673-01A	Ovarian	HR-WT	GRCh38	FALSE	FALSE	FALSE
TCGA-09-1674-01A	Ovarian	HR-WT	GRCh38	FALSE	FALSE	FALSE
TCGA-09-2049-01D	Ovarian	HR-WT	GRCh38	FALSE	FALSE	FALSE
TCGA-09-2053-01C	Ovarian	HR-WT	GRCh38	FALSE	FALSE	FALSE
TCGA-10-0926-01A	Ovarian	HR-WT	GRCh38	FALSE	FALSE	FALSE
TCGA-10-0927-01A	Ovarian	HR-WT	GRCh38	FALSE	FALSE	FALSE
TCGA-10-0930-01A	Ovarian	HR-WT	GRCh38	FALSE	FALSE	FALSE
TCGA-10-0933-01A	Ovarian	HR-WT	GRCh38	FALSE	FALSE	FALSE
TCGA-10-0934-01A	Ovarian	HR-WT	GRCh38	FALSE	FALSE	FALSE
TCGA-10-0935-01A	Ovarian	HR-WT	GRCh38	FALSE	FALSE	FALSE
TCGA-13-0717-01A	Ovarian	HR-WT	GRCh38	FALSE	FALSE	FALSE
TCGA-13-0723-01A	Ovarian	HR-WT	GRCh38	FALSE	FALSE	FALSE
TCGA-13-0724-01A	Ovarian	HR-WT	GRCh38	FALSE	FALSE	FALSE
TCGA-13-0755-01A	Ovarian	HR-WT	GRCh38	FALSE	FALSE	FALSE
TCGA-13-0760-01A	Ovarian	HR-WT	GRCh38	FALSE	FALSE	FALSE
TCGA-13-0791-01A	Ovarian	HR-WT	GRCh38	FALSE	FALSE	FALSE
TCGA-13-0795-01A	Ovarian	HR-WT	GRCh38	FALSE	FALSE	FALSE
TCGA-13-0800-01A	Ovarian	HR-WT	GRCh38	FALSE	FALSE	FALSE
TCGA-13-0804-01A	Ovarian	HR-WT	GRCh38	FALSE	FALSE	FALSE
TCGA-13-0807-01B	Ovarian	HR-WT	GRCh38	FALSE	FALSE	FALSE
TCGA-13-0884-01B	Ovarian	HR-WT	GRCh38	FALSE	FALSE	FALSE
TCGA-13-0889-01A	Ovarian	HR-WT	GRCh38	FALSE	FALSE	FALSE
TCGA-13-0891-01A	Ovarian	HR-WT	GRCh38	FALSE	FALSE	FALSE
TCGA-13-0897-01A	Ovarian	HR-WT	GRCh38	FALSE	FALSE	FALSE
TCGA-13-0899-01A	Ovarian	HR-WT	GRCh38	FALSE	FALSE	FALSE
TCGA-13-0904-01A	Ovarian	HR-WT	GRCh38	FALSE	FALSE	FALSE
TCGA-13-0905-01B	Ovarian	HR-WT	GRCh38	FALSE	FALSE	FALSE
TCGA-13-0910-01A	Ovarian	HR-WT	GRCh38	FALSE	FALSE	FALSE
TCGA-13-0911-01A	Ovarian	HR-WT	GRCh38	FALSE	FALSE	FALSE
TCGA-13-0912-01A	Ovarian	HR-WT	GRCh38	FALSE	FALSE	FALSE
TCGA-13-0919-01A	Ovarian	HR-WT	GRCh38	FALSE	FALSE	FALSE
TCGA-13-0920-01A	Ovarian	HR-WT	GRCh38	FALSE	FALSE	FALSE
TCGA-13-0924-01A	Ovarian	HR-WT	GRCh38	FALSE	FALSE	FALSE
TCGA-13-1403-01A	Ovarian	HR-WT	GRCh38	FALSE	FALSE	FALSE
TCGA-13-1405-01A	Ovarian	HR-WT	GRCh38	FALSE	FALSE	FALSE
TCGA-13-1409-01A	Ovarian	HR-WT	GRCh38	FALSE	FALSE	FALSE
TCGA-13-1410-01A	Ovarian	HR-WT	GRCh38	FALSE	FALSE	FALSE
TCGA-13-1411-01A	Ovarian	HR-WT	GRCh38	FALSE	FALSE	FALSE
TCGA-13-1412-01A	Ovarian	HR-WT	GRCh38	FALSE	FALSE	FALSE
TCGA-13-1477-01A	Ovarian	HR-WT	GRCh38	FALSE	FALSE	FALSE
TCGA-13-1482-01A	Ovarian	HR-WT	GRCh38	FALSE	FALSE	FALSE
TCGA-13-1483-01A	Ovarian	HR-WT	GRCh38	FALSE	FALSE	FALSE
TCGA-13-1484-01A	Ovarian	HR-WT	GRCh38	FALSE	FALSE	FALSE
TCGA-13-1487-01A	Ovarian	HR-WT	GRCh38	FALSE	FALSE	FALSE
TCGA-13-1491-01A	Ovarian	HR-WT	GRCh38	FALSE	FALSE	FALSE
TCGA-13-1492-01A	Ovarian	HR-WT	GRCh38	FALSE	FALSE	FALSE
TCGA-13-1495-01A	Ovarian	HR-WT	GRCh38	FALSE	FALSE	FALSE
TCGA-13-1496-01A	Ovarian	HR-WT	GRCh38	FALSE	FALSE	FALSE
TCGA-13-1497-01A	Ovarian	HR-WT	GRCh38	FALSE	FALSE	FALSE
TCGA-13-1501-01A	Ovarian	HR-WT	GRCh38	FALSE	FALSE	FALSE
TCGA-13-1504-01A	Ovarian	HR-WT	GRCh38	FALSE	FALSE	FALSE
TCGA-13-1505-01A	Ovarian	HR-WT	GRCh38	FALSE	FALSE	FALSE
TCGA-13-1506-01A	Ovarian	HR-WT	GRCh38	FALSE	FALSE	FALSE
TCGA-13-1507-01A	Ovarian	HR-WT	GRCh38	FALSE	FALSE	FALSE
TCGA-13-1509-01A	Ovarian	HR-WT	GRCh38	FALSE	FALSE	FALSE
TCGA-13-1510-01A	Ovarian	HR-WT	GRCh38	FALSE	FALSE	FALSE
TCGA-13-1511-01A	Ovarian	HR-WT	GRCh38	FALSE	FALSE	FALSE
TCGA-13-2060-01A	Ovarian	HR-WT	GRCh38	FALSE	FALSE	FALSE
TCGA-13-A5FT-01A	Ovarian	HR-WT	GRCh38	FALSE	FALSE	FALSE
TCGA-20-0987-01A	Ovarian	HR-WT	GRCh38	FALSE	FALSE	FALSE
TCGA-20-0990-01A	Ovarian	HR-WT	GRCh38	FALSE	FALSE	FALSE
TCGA-20-0991-01A	Ovarian	HR-WT	GRCh38	FALSE	FALSE	FALSE
TCGA-20-1683-01A	Ovarian	HR-WT	GRCh38	FALSE	FALSE	FALSE
TCGA-20-1684-01A	Ovarian	HR-WT	GRCh38	FALSE	FALSE	FALSE
TCGA-23-1022-01A	Ovarian	HR-WT	GRCh38	FALSE	FALSE	FALSE
TCGA-23-1031-01A	Ovarian	HR-WT	GRCh38	FALSE	FALSE	FALSE
TCGA-23-1032-01A	Ovarian	HR-WT	GRCh38	FALSE	FALSE	FALSE
TCGA-23-1110-01A	Ovarian	HR-WT	GRCh38	FALSE	FALSE	FALSE
TCGA-23-1111-01A	Ovarian	HR-WT	GRCh38	FALSE	FALSE	FALSE
TCGA-23-1116-01A	Ovarian	HR-WT	GRCh38	FALSE	FALSE	FALSE
TCGA-23-1117-01A	Ovarian	HR-WT	GRCh38	FALSE	FALSE	FALSE
TCGA-23-1123-01A	Ovarian	HR-WT	GRCh38	FALSE	FALSE	FALSE
TCGA-23-1124-01A	Ovarian	HR-WT	GRCh38	FALSE	FALSE	FALSE
TCGA-23-1809-01A	Ovarian	HR-WT	GRCh38	FALSE	FALSE	FALSE
TCGA-23-2072-01A	Ovarian	HR-WT	GRCh38	FALSE	FALSE	FALSE
TCGA-24-0966-01A	Ovarian	HR-WT	GRCh38	FALSE	FALSE	FALSE
TCGA-24-0970-01B	Ovarian	HR-WT	GRCh38	FALSE	FALSE	FALSE
TCGA-24-0979-01A	Ovarian	HR-WT	GRCh38	FALSE	FALSE	FALSE
TCGA-24-0980-01A	Ovarian	HR-WT	GRCh38	FALSE	FALSE	FALSE
TCGA-24-0982-01A	Ovarian	HR-WT	GRCh38	FALSE	FALSE	FALSE
TCGA-24-1413-01A	Ovarian	HR-WT	GRCh38	FALSE	FALSE	FALSE
TCGA-24-1416-01A	Ovarian	HR-WT	GRCh38	FALSE	FALSE	FALSE
TCGA-24-1418-01A	Ovarian	HR-WT	GRCh38	FALSE	FALSE	FALSE
TCGA-24-1419-01A	Ovarian	HR-WT	GRCh38	FALSE	FALSE	FALSE
TCGA-24-1422-01A	Ovarian	HR-WT	GRCh38	FALSE	FALSE	FALSE
TCGA-24-1424-01A	Ovarian	HR-WT	GRCh38	FALSE	FALSE	FALSE
TCGA-24-1425-01A	Ovarian	HR-WT	GRCh38	FALSE	FALSE	FALSE
TCGA-24-1426-01A	Ovarian	HR-WT	GRCh38	FALSE	FALSE	FALSE
TCGA-24-1431-01A	Ovarian	HR-WT	GRCh38	FALSE	FALSE	FALSE
TCGA-24-1434-01A	Ovarian	HR-WT	GRCh38	FALSE	FALSE	FALSE
TCGA-24-1436-01A	Ovarian	HR-WT	GRCh38	FALSE	FALSE	FALSE
TCGA-24-1464-01A	Ovarian	HR-WT	GRCh38	FALSE	FALSE	FALSE
TCGA-24-1466-01A	Ovarian	HR-WT	GRCh38	FALSE	FALSE	FALSE
TCGA-24-1467-01A	Ovarian	HR-WT	GRCh38	FALSE	FALSE	FALSE
TCGA-24-1469-01A	Ovarian	HR-WT	GRCh38	FALSE	FALSE	FALSE
TCGA-24-1471-01A	Ovarian	HR-WT	GRCh38	FALSE	FALSE	FALSE
TCGA-24-1474-01A	Ovarian	HR-WT	GRCh38	FALSE	FALSE	FALSE
TCGA-24-1549-01A	Ovarian	HR-WT	GRCh38	FALSE	FALSE	FALSE
TCGA-24-1550-01A	Ovarian	HR-WT	GRCh38	FALSE	FALSE	FALSE
TCGA-24-1551-01A	Ovarian	HR-WT	GRCh38	FALSE	FALSE	FALSE
TCGA-24-1552-01A	Ovarian	HR-WT	GRCh38	FALSE	FALSE	FALSE
TCGA-24-1562-01A	Ovarian	HR-WT	GRCh38	FALSE	FALSE	FALSE
TCGA-24-1563-01A	Ovarian	HR-WT	GRCh38	FALSE	FALSE	FALSE
TCGA-24-1565-01A	Ovarian	HR-WT	GRCh38	FALSE	FALSE	FALSE
TCGA-24-1603-01A	Ovarian	HR-WT	GRCh38	FALSE	FALSE	FALSE
TCGA-24-1616-01A	Ovarian	HR-WT	GRCh38	FALSE	FALSE	FALSE
TCGA-24-1842-01A	Ovarian	HR-WT	GRCh38	FALSE	FALSE	FALSE
TCGA-24-1843-01A	Ovarian	HR-WT	GRCh38	FALSE	FALSE	FALSE
TCGA-24-1844-01A	Ovarian	HR-WT	GRCh38	FALSE	FALSE	FALSE
TCGA-24-1850-01A	Ovarian	HR-WT	GRCh38	FALSE	FALSE	FALSE
TCGA-24-2019-01A	Ovarian	HR-WT	GRCh38	FALSE	FALSE	FALSE
TCGA-24-2030-01A	Ovarian	HR-WT	GRCh38	FALSE	FALSE	FALSE
TCGA-24-2033-01A	Ovarian	HR-WT	GRCh38	FALSE	FALSE	FALSE
TCGA-24-2036-01A	Ovarian	HR-WT	GRCh38	FALSE	FALSE	FALSE
TCGA-24-2038-01A	Ovarian	HR-WT	GRCh38	FALSE	FALSE	FALSE
TCGA-24-2254-01A	Ovarian	HR-WT	GRCh38	FALSE	FALSE	FALSE
TCGA-24-2260-01A	Ovarian	HR-WT	GRCh38	FALSE	FALSE	FALSE
TCGA-24-2261-01A	Ovarian	HR-WT	GRCh38	FALSE	FALSE	FALSE
TCGA-24-2262-01A	Ovarian	HR-WT	GRCh38	FALSE	FALSE	FALSE
TCGA-24-2271-01A	Ovarian	HR-WT	GRCh38	FALSE	FALSE	FALSE
TCGA-24-2281-01A	Ovarian	HR-WT	GRCh38	FALSE	FALSE	FALSE
TCGA-24-2289-01A	Ovarian	HR-WT	GRCh38	FALSE	FALSE	FALSE
TCGA-24-2290-01A	Ovarian	HR-WT	GRCh38	FALSE	FALSE	FALSE
TCGA-25-1312-01A	Ovarian	HR-WT	GRCh38	FALSE	FALSE	FALSE
TCGA-25-1313-01A	Ovarian	HR-WT	GRCh38	FALSE	FALSE	FALSE
TCGA-25-1315-01A	Ovarian	HR-WT	GRCh38	FALSE	FALSE	FALSE
TCGA-25-1316-01A	Ovarian	HR-WT	GRCh38	FALSE	FALSE	FALSE
TCGA-25-1319-01A	Ovarian	HR-WT	GRCh38	FALSE	FALSE	FALSE
TCGA-25-1321-01A	Ovarian	HR-WT	GRCh38	FALSE	FALSE	FALSE
TCGA-25-1322-01A	Ovarian	HR-WT	GRCh38	FALSE	FALSE	FALSE
TCGA-25-1323-01A	Ovarian	HR-WT	GRCh38	FALSE	FALSE	FALSE
TCGA-25-1328-01A	Ovarian	HR-WT	GRCh38	FALSE	FALSE	FALSE
TCGA-25-1329-01A	Ovarian	HR-WT	GRCh38	FALSE	FALSE	FALSE
TCGA-25-2042-01A	Ovarian	HR-WT	GRCh38	FALSE	FALSE	FALSE
TCGA-25-2391-01A	Ovarian	HR-WT	GRCh38	FALSE	FALSE	FALSE
TCGA-25-2393-01A	Ovarian	HR-WT	GRCh38	FALSE	FALSE	FALSE
TCGA-25-2396-01A	Ovarian	HR-WT	GRCh38	FALSE	FALSE	FALSE
TCGA-25-2398-01A	Ovarian	HR-WT	GRCh38	FALSE	FALSE	FALSE
TCGA-25-2400-01A	Ovarian	HR-WT	GRCh38	FALSE	FALSE	FALSE
TCGA-25-2408-01A	Ovarian	HR-WT	GRCh38	FALSE	FALSE	FALSE
TCGA-29-1690-01A	Ovarian	HR-WT	GRCh38	FALSE	FALSE	FALSE
TCGA-29-1695-01A	Ovarian	HR-WT	GRCh38	FALSE	FALSE	FALSE
TCGA-29-1697-01A	Ovarian	HR-WT	GRCh38	FALSE	FALSE	FALSE
TCGA-29-1698-01A	Ovarian	HR-WT	GRCh38	FALSE	FALSE	FALSE
TCGA-29-1699-01A	Ovarian	HR-WT	GRCh38	FALSE	FALSE	FALSE
TCGA-29-1701-01A	Ovarian	HR-WT	GRCh38	FALSE	FALSE	FALSE
TCGA-29-1702-01A	Ovarian	HR-WT	GRCh38	FALSE	FALSE	FALSE
TCGA-29-1705-01A	Ovarian	HR-WT	GRCh38	FALSE	FALSE	FALSE
TCGA-29-1710-01A	Ovarian	HR-WT	GRCh38	FALSE	FALSE	FALSE
TCGA-29-1711-01A	Ovarian	HR-WT	GRCh38	FALSE	FALSE	FALSE
TCGA-29-1761-01A	Ovarian	HR-WT	GRCh38	FALSE	FALSE	FALSE
TCGA-29-1763-01A	Ovarian	HR-WT	GRCh38	FALSE	FALSE	FALSE
TCGA-29-1778-01A	Ovarian	HR-WT	GRCh38	FALSE	FALSE	FALSE
TCGA-29-1783-01A	Ovarian	HR-WT	GRCh38	FALSE	FALSE	FALSE
TCGA-29-1785-01A	Ovarian	HR-WT	GRCh38	FALSE	FALSE	FALSE
TCGA-30-1853-01A	Ovarian	HR-WT	GRCh38	FALSE	FALSE	FALSE
TCGA-30-1855-01A	Ovarian	HR-WT	GRCh38	FALSE	FALSE	FALSE
TCGA-30-1891-01A	Ovarian	HR-WT	GRCh38	FALSE	FALSE	FALSE
TCGA-31-1950-01A	Ovarian	HR-WT	GRCh38	FALSE	FALSE	FALSE
TCGA-31-1953-01A	Ovarian	HR-WT	GRCh38	FALSE	FALSE	FALSE
TCGA-59-2352-01A	Ovarian	HR-WT	GRCh38	FALSE	FALSE	FALSE
TCGA-59-2354-01A	Ovarian	HR-WT	GRCh38	FALSE	FALSE	FALSE
TCGA-59-2363-01A	Ovarian	HR-WT	GRCh38	FALSE	FALSE	FALSE
TCGA-61-1727-01A	Ovarian	HR-WT	GRCh38	FALSE	FALSE	FALSE
TCGA-61-1728-01A	Ovarian	HR-WT	GRCh38	FALSE	FALSE	FALSE
TCGA-61-1734-01B	Ovarian	HR-WT	GRCh38	FALSE	FALSE	FALSE
TCGA-61-1736-01B	Ovarian	HR-WT	GRCh38	FALSE	FALSE	FALSE
TCGA-61-1737-01A	Ovarian	HR-WT	GRCh38	FALSE	FALSE	FALSE
TCGA-61-1738-01A	Ovarian	HR-WT	GRCh38	FALSE	FALSE	FALSE
TCGA-61-1740-01A	Ovarian	HR-WT	GRCh38	FALSE	FALSE	FALSE
TCGA-61-1913-01A	Ovarian	HR-WT	GRCh38	FALSE	FALSE	FALSE
TCGA-61-1919-01A	Ovarian	HR-WT	GRCh38	FALSE	FALSE	FALSE
TCGA-61-1995-01A	Ovarian	HR-WT	GRCh38	FALSE	FALSE	FALSE
TCGA-61-1998-01A	Ovarian	HR-WT	GRCh38	FALSE	FALSE	FALSE
TCGA-61-2000-01A	Ovarian	HR-WT	GRCh38	FALSE	FALSE	FALSE
TCGA-61-2002-01A	Ovarian	HR-WT	GRCh38	FALSE	FALSE	FALSE
TCGA-61-2009-01A	Ovarian	HR-WT	GRCh38	FALSE	FALSE	FALSE
TCGA-61-2016-01A	Ovarian	HR-WT	GRCh38	FALSE	FALSE	FALSE
TCGA-61-2088-01A	Ovarian	HR-WT	GRCh38	FALSE	FALSE	FALSE
TCGA-61-2092-01A	Ovarian	HR-WT	GRCh38	FALSE	FALSE	FALSE
TCGA-61-2094-01A	Ovarian	HR-WT	GRCh38	FALSE	FALSE	FALSE
TCGA-61-2101-01A	Ovarian	HR-WT	GRCh38	FALSE	FALSE	FALSE
TCGA-61-2102-01A	Ovarian	HR-WT	GRCh38	FALSE	FALSE	FALSE
TCGA-61-2110-01A	Ovarian	HR-WT	GRCh38	FALSE	FALSE	FALSE
TCGA-61-2111-01A	Ovarian	HR-WT	GRCh38	FALSE	FALSE	FALSE
TCGA-61-2113-01A	Ovarian	HR-WT	GRCh38	FALSE	FALSE	FALSE

## Sheet: HR_genes
Genes involved in homologous recombination
ATM
ATR
BARD1
BLM
BRCA1
BRCA2
BRIP1
CDK12
CHEK1
CHEK2
FAAP20
FAAP24
FANCA
FANCB
FANCC
FANCD2
FANCE
FANCF
FANCG
FANCI
FANCL
FANCM
GEN1
LIG1
MDC1
MRE11
NBN
PALB2
POLD2
POLD3
POLD4
RAD50
RAD51
RAD51B
RAD51C
RAD51D
RAD52
RAD54B
RAD54L
RBBP8
SHFM1
TOP3A
TOP3B
XRCC2
XRCC3
